# Supplementary material for: Immunization With the CSF-470 Vaccine Plus BCG and rhGM-CSF Induced in a Cutaneous Melanoma Patient a TCRβ Repertoire Found at Vaccination Site and Tumor Infiltrating Lymphocytes That Persisted in Blood
Source: Front Immunol. 2019 Sep 18;10:2213. doi: 10.3389/fimmu.2019.02213 (PMC6759869; doi:10.3389/fimmu.2019.02213)
Supplement: Supplementary Table 3 — PBMC-POST-3 productive rearrangements. [file Table_3.XLSX]

## Sheet: 045-PBMC-POST-3
Rearrangement	Amino_acid	Templates	Productive_frequency	v_resolved	d_resolved	j_resolved																																									sample_tags	fraction_productive	order_name
CACGCCCTGCAGCCAGAAGACTCAGCCCTGTATCTCTGCGCCGGAACTGAACCAGGGTTGGAGAGGACTGAAGCTTTCTTTGGACAA	CAGTEPGLERTEAFF	447	0.00513728	TCRBV04-01*01	TCRBD01-01*01	TCRBJ01-01*01
CTACACGCCCTGCAGCCAGAAGACTCAGCCCTGTATCTCTGCGCCAGCAGCCAGTTCGGGGGGGCTTACGAGCAGTACTTCGGGCCG	CASSQFGGAYEQYF	425	0.00488444	TCRBV04-01*01	TCRBD02-01*01	TCRBJ02-07*01
ATCCGCTCACCAGGCCTGGGGGACGCAGCCATGTACCTGTGTGCCACCAGCAGAGGACAGGGCCGTACACCCCTCCACTTTGGGAAC	CATSRGQGRTPLHF	391	0.00449368	TCRBV15-01*01	TCRBD01-01*01	TCRBJ01-06*01
CTCAAGATCCAGCCTGCAAAGCTTGAGGACTCGGCCGTGTATCTCTGTGCCAGCAGCTTATATGGGGGAGAGCAGTACTTCGGGCCG	CASSLYGGEQYF	345	0.00396502	TCRBV11-02*02		TCRBJ02-07*01
CTGCAGCCAGAAGACTCGGCCCTGTATCTCTGTGCCAGCAGCCAACAAGCAGGACAGGCCTATAATTCACCCCTCCACTTTGGGAAC	CASSQQAGQAYNSPLHF	275	0.00316052	TCRBV04-02*01	TCRBD01-01*01	TCRBJ01-06*01
ATCCTGGAGTCGCCCAGCCCCAACCAGACCTCTCTGTACTTCTGTGCCAGCAGTTTCGGCGGGAGAACTGAAGCTTTCTTTGGACAA	CASSFGGRTEAFF	267	0.00306858	TCRBV27-01*01	TCRBD02-01*02	TCRBJ01-01*01
ACGTTGGCGTCTGCTGTACCCTCTCAGACATCTGTGTACTTCTGTGCCAGCAGTGAGTCTAGCACAGATACGCAGTATTTTGGCCCA	CASSESSTDTQYF	248	0.00285021	TCRBV06-04	TCRBD02-01	TCRBJ02-03*01
CACCTACACACCCTGCAGCCAGAAGACTCGGCCCTGTATCTCTGCGCCAGCAGCTCCGGGACGGACTACGAGCAGTACTTCGGGCCG	CASSSGTDYEQYF	232	0.00266633	TCRBV04-03*01		TCRBJ02-07*01
AGGATCCAGCAGGTAGTGCGAGGAGATTCGGCAGCTTATTTCTGTGCCAGCTCACCGGTAGTACGTCATGGCTACACCTTCGGTTCG	CASSPVVRHGYTF	220	0.00252842	TCRBV18-01*01	TCRBD02-01	TCRBJ01-02*01
AACGCCTTGGAGCTGGACGACTCGGCCCTGTATCTCTGTGCCAGCAGCTTGCAGACTAGCGGGTTCTACGAGCAGTACTTCGGGCCG	CASSLQTSGFYEQYF	189	0.00217214	TCRBV05-04*01	TCRBD02-01	TCRBJ02-07*01
AATGTGAGCACCTTGGAGCTGGGGGACTCGGCCCTTTATCTTTGCGCCAGCAGCGACCGTATGAACACTGAAGCTTTCTTTGGACAA	CASSDRMNTEAFF	158	0.00181586	TCRBV05-01*01		TCRBJ01-01*01
AACCTGAGCTCTCTGGAGCTGGGGGACTCAGCTTTGTATTTCTGTGCCATCGACCTTGGGGGGAACACTGAAGCTTTCTTTGGACAA	CAIDLGGNTEAFF	150	0.00172392	TCRBV09-01		TCRBJ01-01*01
CCCTCAGAACCCAGGGACTCAGCTGTGTATTTTTGTGCTAGTGGTTTGGGTGGCGACAGGGGGAAGTACGAGCAGTACTTCGGGCCG	CASGLGGDRGKYEQYF	148	0.00170093	TCRBV12-05*01	TCRBD01-01*01	TCRBJ02-07*01
ATCCAGCCCTCAGAACCCAGGGACTCAGCTGTGTATTTTTGTGCTAGTGGTGAGCTGGGGGGGGCGACTGAAGCTTTCTTTGGACAA	CASGELGGATEAFF	146	0.00167795	TCRBV12-05*01	TCRBD02-01*01	TCRBJ01-01*01
CGCACAGAGCAGGGGGACTCGGCCATGTATCTCTGTGCCAGCAGCTCCTCCCTCGACATCCTCGCCGGGGAGCTGTTTTTTGGAGAA	CASSSSLDILAGELFF	143	0.00164347	TCRBV07-09	TCRBD01-01*01	TCRBJ02-02*01
CTGTCGGCTGCTCCCTCCCAGACATCTGTGTACTTCTGTGCCAGCAGTTACGTTCAGGGGGTTTCCTACGAGCAGTACTTCGGGCCG	CASSYVQGVSYEQYF	136	0.00156302	TCRBV06-05*01	TCRBD01-01*01	TCRBJ02-07*01
GTGAGCACCTTGGAGCTGGGGGACTCGGCCCTTTATCTTTGCGCCAGCAGCTGGGGACAGGGGGCCGGGGAGCTGTTTTTTGGAGAA	CASSWGQGAGELFF	130	0.00149406	TCRBV05-01*01	TCRBD01-01*01	TCRBJ02-02*01
ATCCAGCGCACAGAGCAGGGGGACTCGGCCATGTATCTCTGTGCCAGCAGGGACTCCTTGGGGACCTATGGCTACACCTTCGGTTCG	CASRDSLGTYGYTF	116	0.00133316	TCRBV07-09		TCRBJ01-02*01
CCTGCAGAACTGGAGGATTCTGGAGTTTATTTCTGTGCCAGCAGCCAAGAGGACGGCGGGCCCACAGATACGCAGTATTTTGGCCCA	CASSQEDGGPTDTQYF	95	0.00109182	TCRBV14-01*01	TCRBD02-01	TCRBJ02-03*01
TTGGAGCTGGGGGACTCGGCCCTTTATCTTTGCGCCAGCAGCTCCGCTCTAGCGGGGGAACGCTCCTACGAGCAGTACTTCGGGCCG	CASSSALAGERSYEQYF	95	0.00109182	TCRBV05-01*01	TCRBD02-01*01	TCRBJ02-07*01
ACATCGGCCCAAAAGAACCCGACAGCTTTCTATCTCTGTGCCAGTAGTGAGACAGGGGGCGTTAGTCAGCCCCAGCATTTTGGTGAT	CASSETGGVSQPQHF	79	0.000907931	TCRBV19-01	TCRBD01-01*01	TCRBJ01-05*01
CTGAACATGAGCTCCTTGGAGCTGGGGGACTCAGCCCTGTACTTCTGTGCCAGCAGCTCTGACAGTACGGTCCACACCTTCGGTTCG	CASSSDSTVHTF	75	0.00086196	TCRBV13-01*01	TCRBD01-01*01	TCRBJ01-02*01
GTGACCAGTGCCCATCCTGAAGACAGCAGCTTCTACATCTGCAGTGCTAGAGATCTGCAGGGGGCTAGAGAGCAGTACTTCGGGCCG	CSARDLQGAREQYF	74	0.000850467	TCRBV20	TCRBD01-01*01	TCRBJ02-07*01
CCCAGCCCCAACCAGACCTCTCTGTACTTCTGTGCCAGCAGTTTATCTCGTACAGGACAGGGGGCGCGGGAGCAGTACTTCGGGCCG	CASSLSRTGQGAREQYF	73	0.000838974	TCRBV27-01*01	TCRBD01-01*01	TCRBJ02-07*01
GTGAGCACCTTGGAGCTGGGGGACTCGGCCCTTTATCTTTGCGCCAGCAGCTTGACCGGGGCCTCAGAGACCCAGTACTTCGGGCCA	CASSLTGASETQYF	71	0.000815989	TCRBV05-01*01		TCRBJ02-05*01
GCAAAGCTTGAGGACTCGGCCGTGTATCTCTGTGCCAGCAGCTTAGGTCGGACAGGTCGGCTTGGCGACGAGCAGTACTTCGGGCCG	CASSLGRTGRLGDEQYF	68	0.00078151	TCRBV11-02*02	TCRBD01-01*01	TCRBJ02-07*01
ATCCAGCCCTCAGAACCCAGGGACTCAGCTGTGTACTTCTGTGCCAGCAGCCTCGGGAAGGGGCCATCGCCCCAGCATTTTGGTGAT	CASSLGKGPSPQHF	64	0.000735539	TCRBV12		TCRBJ01-05*01
ATCCAGCCCTCAGAACCCAGGGACTCAGCTGTGTACTTCTGTGCCAGCAGTTTGACAGGCACTAACTATGGCTACACCTTCGGTTCG	CASSLTGTNYGYTF	63	0.000724046	TCRBV12	TCRBD01-01*01	TCRBJ01-02*01
CTGGAGTCGCCCAGCCCCAACCAGACCTCTCTGTACTTCTGTGCCAGCAGTGTGGACAGGGGGCCCAATGAGCAGTTCTTCGGGCCA	CASSVDRGPNEQFF	61	0.000701061	TCRBV27-01*01	TCRBD01-01*01	TCRBJ02-01*01
ATCCTGGAGTCGCCCAGCCCCAACCAGACCTCTCTGTACTTCTGTGCCAGCAGTTACGGACTCGGTGAAAAACTGTTTTTTGGCAGT	CASSYGLGEKLFF	61	0.000701061	TCRBV27-01*01	TCRBD02-01	TCRBJ01-04*01
AGGCTGCTGTCGGCTGCTCCCTCCCAGACATCTGTGTACTTCTGTGCCAGCAGACACAGGGACTCCTACGAGCAGTACTTCGGGCCG	CASRHRDSYEQYF	60	0.000689568	TCRBV06-05*01	TCRBD01-01*01	TCRBJ02-07*01
GCCCAAAAGAACCCGACAGCTTTCTATCTCTGTGCCAGTAGTATAGGGGCCGGGGGCCCGAACACCGGGGAGCTGTTTTTTGGAGAA	CASSIGAGGPNTGELFF	60	0.000689568	TCRBV19-01		TCRBJ02-02*01
CAGCAGGTAGTGCGAGGAGATTCGGCAGCTTATTTCTGTGCCAGCTCACCTACAGGGTGGGGAAACACTGAAGCTTTCTTTGGACAA	CASSPTGWGNTEAFF	59	0.000678075	TCRBV18-01*01	TCRBD01-01*01	TCRBJ01-01*01
ACTGTGACATCGGCCCAAAAGAACCCGACAGCTTTCTATCTCTGTGCCACCCGGGGGACAGGGGATGAAAAACTGTTTTTTGGCAGT	CATRGTGDEKLFF	56	0.000643597	TCRBV19-01	TCRBD01-01*01	TCRBJ01-04*01
CCTGCAAAGCTTGAGGACTCGGCCGTGTATCTCTGTGCCAGCAGCACCCGGGACCCGAGCTCTGGAAACACCATATATTTTGGAGAG	CASSTRDPSSGNTIYF	55	0.000632104	TCRBV11-02*02		TCRBJ01-03*01
CAGCCCTCAGAACCCAGGGACTCAGCTGTGTACTTCTGTGCCAGCAGCCGGACAGGGGCGGGAGGAAACACCATATATTTTGGAGAG	CASSRTGAGGNTIYF	54	0.000620611	TCRBV12	TCRBD01-01*01	TCRBJ01-03*01
TCCCTGGAGCTTGGTGACTCTGCTGTGTATTTCTGTGCCAGCAGCCCATGGGTGGGGGGGGCCAAGAATGAGCAGTTCTTCGGGCCA	CASSPWVGGAKNEQFF	53	0.000609118	TCRBV03	TCRBD02-01*01	TCRBJ02-01*01
ACAGTGACCAGTGCCCATCCTGAAGACAGCAGCTTCTACATCTGCAGTGCTAGGGGTAGGGATAGAGTAGGCTACACCTTCGGTTCG	CSARGRDRVGYTF	51	0.000586133	TCRBV20		TCRBJ01-02*01
ATCCAGCCTGCAAAGCTTGAGGACTCGGCCGTGTATCTCTGTGCCAGCAGCTTGCCGGGACAGGGATACGAGCAGTACTTCGGGCCG	CASSLPGQGYEQYF	49	0.000563147	TCRBV11-02*02	TCRBD01-01*01	TCRBJ02-07*01
TCCCTGGAGCTTGGTGACTCTGCTGTGTATTTCTGTGCCAGCAGCCCTTGGAGCGGGGGGGCGAAAAACGAGCAGTACTTCGGGCCG	CASSPWSGGAKNEQYF	48	0.000551654	TCRBV03	TCRBD02-01*01	TCRBJ02-07*01
CTGGAGTCGGCTGCTCCCTCCCAGACATCTGTGTACTTCTGTGCCAGCAGTGAGACCCCGGACACCGGGGAGCTGTTTTTTGGAGAA	CASSETPDTGELFF	47	0.000540162	TCRBV06-01*01		TCRBJ02-02*01
AAGATCCAGCGCACACAGCAGGAGGACTCCGCCGTGTATCTCTGTGCCAGCAGACCGGACAGAAACACTGAAGCTTTCTTTGGACAA	CASRPDRNTEAFF	47	0.000540162	TCRBV07-08*01	TCRBD01-01*01	TCRBJ01-01*01
CTGGAGTCCGCCAGCACCAACCAGACATCTATGTACCTCTGTGCCAGCAGATCAGACCTTACGGGCACTGAAGCTTTCTTTGGACAA	CASRSDLTGTEAFF	47	0.000540162	TCRBV28-01*01	TCRBD02-01	TCRBJ01-01*01
CTGGAGTCGGCTGCTCCCTCCCAGACATCTGTGTACTTCTGTGCCAGCAGCTCCGGGACAGGGATTTCACCCCTCCACTTTGGGAAC	CASSSGTGISPLHF	46	0.000528669	TCRBV06-01*01	TCRBD01-01*01	TCRBJ01-06*01
AACGCCTTGGAGCTGGACGACTCGGCCCTGTATCTCTGTGCCAGCAGCCGCGTTGGCGGGGGGGCCTACGAGCAGTACTTCGGGCCG	CASSRVGGGAYEQYF	45	0.000517176	TCRBV05-04*01	TCRBD02-01*01	TCRBJ02-07*01
CTGTCGGCTGCTCCCTCCCAGACATCTGTGTACTTCTGTGCCAGCAGATCCCCGGGACAGGGGAACACTGAAGCTTTCTTTGGACAA	CASRSPGQGNTEAFF	43	0.00049419	TCRBV06-05*01	TCRBD01-01*01	TCRBJ01-01*01
GTGACATCGGCCCAAAAGAACCCGACAGCTTTCTATCTCTGTGCCAGTAGTATGGGCCAGGGGGGAACTGAAGCTTTCTTTGGACAA	CASSMGQGGTEAFF	42	0.000482698	TCRBV19-01	TCRBD01-01*01	TCRBJ01-01*01
ACGTTGGCGTCTGCTGTACCCTCTCAGACATCTGTGTACTTCTGTGCCAGCAGTATGGGGTTCGATCAGCCCCAGCATTTTGGTGAT	CASSMGFDQPQHF	41	0.000471205	TCRBV06-04		TCRBJ01-05*01
CAGCAGGTAGTGCGAGGAGATTCGGCAGCTTATTTCTGTGCCAGCTCCCCCCTAGGGGGGTGGGGATACGAGCAGTACTTCGGGCCG	CASSPLGGWGYEQYF	41	0.000471205	TCRBV18-01*01		TCRBJ02-07*01
ATCAATTCCCTGGAGCTTGGTGACTCTGCTGTGTATTTCTGTGCCAGCAGCCTGGCCGGGACTCCCTACGAGCAGTACTTCGGGCCG	CASSLAGTPYEQYF	40	0.000459712	TCRBV03	TCRBD02-01	TCRBJ02-07*01
GAGTCTGCCATCCCCAACCAGACAGCTCTTTACTTCTGTGCCACCAGGACGGGGGACAGGGACCTCAGTGAGCAGTTCTTCGGGCCA	CATRTGDRDLSEQFF	40	0.000459712	TCRBV24	TCRBD01-01*01	TCRBJ02-01*01
CTGGAGTCGCCCAGCCCCAACCAGACCTCTCTGTACTTCTGTGCCAGCAGTTTCGGCGGGGATAATGAAAAACTGTTTTTTGGCAGT	CASSFGGDNEKLFF	39	0.000448219	TCRBV27-01*01	TCRBD02-01*01	TCRBJ01-04*01
CGCACACAGCAGGAGGACTCGGCCGTGTATCTCTGTGCCAGCAGCTTAGCCCCTGGAGCGCCGGGTGGGGAGCAGTACTTCGGGCCG	CASSLAPGAPGGEQYF	39	0.000448219	TCRBV07-02*01	TCRBD02-01	TCRBJ02-07*01
CCCTCAGAACCCAGGGACTCAGCTGTGTACTTCTGTGCCAGCAGACCTGACGCCGGGGGGGCGCGCACTGAAGCTTTCTTTGGACAA	CASRPDAGGARTEAFF	39	0.000448219	TCRBV12	TCRBD02-01*01	TCRBJ01-01*01
ACAGTGACCAGTGCCCATCCTGAAGACAGCAGCTTCTACATCTGCAGTGCTAGGACGGGGGGCCGTCAGCCCCAGCATTTTGGTGAT	CSARTGGRQPQHF	39	0.000448219	TCRBV20	TCRBD02-01*01	TCRBJ01-05*01
AACCTTCACCTACACGCCCTGCAGCCAGAAGACTCAGCCCTGTATCTCTGCGCCAGCACTCAAGGGACTGGCTACACCTTCGGTTCG	CASTQGTGYTF	36	0.000413741	TCRBV04-01*01		TCRBJ01-02*01
ACTGTGACATCGGCCCAAAAGAACCCGACAGCTTTCTATCTCTGTGCCACCACCCCGGGGGCGGCCGGGGAGCTGTTTTTTGGAGAA	CATTPGAAGELFF	35	0.000402248	TCRBV19-01		TCRBJ02-02*01
ATCCAGCGCACACAGCAGGAGGACTCGGCCGTGTATCTCTGTGCCAGCAGCTTACAGGCCGGGGGGCGGGAGCAGTACTTCGGGCCG	CASSLQAGGREQYF	34	0.000390755	TCRBV07-02*01	TCRBD02-01*01	TCRBJ02-07*01
CTACACGCCCTGCAGCCAGAAGACTCAGCCCTGTATCTCTGCGCCAGCAGCCAAGGTGGGCCCCTGAATGAGCAGTTCTTCGGGCCA	CASSQGGPLNEQFF	32	0.00036777	TCRBV04-01*01	TCRBD01-01*01	TCRBJ02-01*01
GCGTCTGCTGTACCCTCTCAGACATCTGTGTACTTCTGTGCCAGCAGTGACGGGGCAGGAACGTACAATGAGCAGTTCTTCGGGCCA	CASSDGAGTYNEQFF	32	0.00036777	TCRBV06-04	TCRBD01-01*01	TCRBJ02-01*01
ACAGTGACCAGTGCCCATCCTGAAGACAGCAGCTTCTACATCTGCAGTGCCATCTGGACAGGGGGCGATGGCTACACCTTCGGTTCG	CSAIWTGGDGYTF	32	0.00036777	TCRBV20	TCRBD01-01*01	TCRBJ01-02*01
GTGACCAGTGCCCATCCTGAAGACAGCAGCTTCTACATCTGCAGTGCTAGAGATCAGGGGGTCTTAAATGAAGCTTTCTTTGGACAA	CSARDQGVLNEAFF	32	0.00036777	TCRBV20	TCRBD01-01*01	TCRBJ01-01*01
AGGCTGGAGTTGGCTGCTCCCTCCCAGACATCTGTGTACTTCTGTGCCAGCATCAAAGGGAGTGGGGCTGAAGCTTTCTTTGGACAA	CASIKGSGAEAFF	31	0.000356277	TCRBV06-06	TCRBD02-01*02	TCRBJ01-01*01
CAGCCTGCAGAACTGGAGGATTCTGGAGTTTATTTCTGTGCCAGCAGCCAAAGGGTTAACGGTAATGAAAAACTGTTTTTTGGCAGT	CASSQRVNGNEKLFF	31	0.000356277	TCRBV14-01*01		TCRBJ01-04*01
ACAGAGCAGGGGGACTCGGCCATGTATCTCTGTGCCAGCAGCTTAGTTGGACAGGGGGCGTCTAACTATGGCTACACCTTCGGTTCG	CASSLVGQGASNYGYTF	31	0.000356277	TCRBV07-09	TCRBD01-01*01	TCRBJ01-02*01
CACATCAATTCCCTGGAGCTTGGTGACTCTGCTGTGTATTTCTGTGCCAGCAGCCAAGGGGAAACCTACGAGCAGTACTTCGGGCCG	CASSQGETYEQYF	31	0.000356277	TCRBV03		TCRBJ02-07*01
CTGGAGTCCGCCAGCACCAACCAGACATCTATGTACCTCTGTGCCAGCAGTGGCTTGGGATCTCATTACGAGCAGTACTTCGGGCCG	CASSGLGSHYEQYF	30	0.000344784	TCRBV28-01*01		TCRBJ02-07*01
ACCAGTGCCCATCCTGAAGACAGCAGCTTCTACATCTGCAGTGCTAGATTATGGGAGGGGGGGGACCACGAGCAGTACTTCGGGCCG	CSARLWEGGDHEQYF	30	0.000344784	TCRBV20	TCRBD02-01	TCRBJ02-07*01
AGCTCTCTGGAGCTGGGGGACTCAGCTTTGTATTTCTGTGCCAGCAGCGCCGACAGGGCTACCTACAATGAGCAGTTCTTCGGGCCA	CASSADRATYNEQFF	29	0.000333291	TCRBV09-01	TCRBD01-01*01	TCRBJ02-01*01
ATCCTGAGGATCCAGCAGGTAGTGCGAGGAGATTCGGCAGCTTATTTCTGTGCCAGCTCAAGCGGAGACGGCTACACCTTCGGTTCG	CASSSGDGYTF	29	0.000333291	TCRBV18-01*01	TCRBD02-01	TCRBJ01-02*01
TCTGAGATGAATGTGAGCACCTTGGAGCTGGGGGACTCGGCCCTTTATCTTTGCGCCAGGCACCCCCCCTGCCACACCTTCGGTTCG	CARHPPCHTF	29	0.000333291	TCRBV05-01*01		TCRBJ01-02*01
AGCACCTTGGAGCTGGGGGACTCGGCCCTTTATCTTTGCGCCAGCAGCTTGGGGACTTACGCGAACTATGGCTACACCTTCGGTTCG	CASSLGTYANYGYTF	29	0.000333291	TCRBV05-01*01	TCRBD02-01	TCRBJ01-02*01
ACCAGCTCCCAGACATCTGTGTACTTCTGTGCCATCAGTGAGGTTCCGGGACTGAGCTCCTATAATTCACCCCTCCACTTTGGGAAC	CAISEVPGLSSYNSPLHF	29	0.000333291	TCRBV10-03*01	TCRBD02-01	TCRBJ01-06*01
CAGCCTGCAAAGCTTGAGGACTCGGCCGTGTATCTCTGTGCCAGCGGGGGAAGAGGGCGACTTGCCTACGAGCAGTACTTCGGGCCG	CASGGRGRLAYEQYF	29	0.000333291	TCRBV11-02*02		TCRBJ02-07*01
ACTGTGACATCGGCCCAAAAGAACCCGACAGCTTTCTATCTCTGTGCCAGTAGTATAGTGTTGCGGGATGAGCAGTTCTTCGGGCCA	CASSIVLRDEQFF	29	0.000333291	TCRBV19-01	TCRBD02-01	TCRBJ02-01*01
ATCCAGCCCTCAGAACCCAGGGACTCAGCTGTGTACTTCTGTGCCAGCAGTCCAGGGCTCTCTGGAAACACCATATATTTTGGAGAG	CASSPGLSGNTIYF	29	0.000333291	TCRBV12	TCRBD01-01*01	TCRBJ01-03*01
CTGAAGATCCGGTCCACAAAGCTGGAGGACTCAGCCATGTACTTCTGTGCCAGCAGCCCCCTCGGAAACACCATATATTTTGGAGAG	CASSPLGNTIYF	28	0.000321798	TCRBV02-01*01	TCRBD02-01	TCRBJ01-03*01
GTGACCAGTGCCCATCCTGAAGACAGCAGCTTCTACATCTGCAGTGCTAGGGGGGACAGGGACCTTTACGAGCAGTACTTCGGGCCG	CSARGDRDLYEQYF	28	0.000321798	TCRBV20	TCRBD01-01*01	TCRBJ02-07*01
CTGAGCTCTCTGGAGCTGGGGGACTCAGCTTTGTATTTCTGTGCCAGCAGCACCGCGGGGGGGCCTAGAGAGCAGTACTTCGGGCCG	CASSTAGGPREQYF	27	0.000310306	TCRBV09-01	TCRBD02-01*01	TCRBJ02-07*01
ACTCTGGAGTCCGCTACCAGCTCCCAGACATCTGTGTACTTCTGTGCCATCAGTGGGGACAGCTCCAATGAGCAGTTCTTCGGGCCA	CAISGDSSNEQFF	27	0.000310306	TCRBV10-03*01	TCRBD01-01*01	TCRBJ02-01*01
CTGATCCTGGAGTCGCCCAGCCCCAACCAGACCTCTCTGTACTTCTGTGCCAGCAGTTTATCAGGCCAGCCCCAGCATTTTGGTGAT	CASSLSGQPQHF	27	0.000310306	TCRBV27-01*01		TCRBJ01-05*01
GTGACCAGTGCCCATCCTGAAGACAGCAGCTTCTACATCTGCAGTGCTAGAGGCGACGGGTTATCCTACGAGCAGTACTTCGGGCCG	CSARGDGLSYEQYF	27	0.000310306	TCRBV20	TCRBD02-01	TCRBJ02-07*01
CTGGAGTCGGCTGCTCCCTCCCAGACATCTGTGTACTTCTGTGCCAGCAGTGCAGACAGGCCCCCGCTGCCCCAGCATTTTGGTGAT	CASSADRPPLPQHF	26	0.000298813	TCRBV06-01*01	TCRBD01-01*01	TCRBJ01-05*01
TCCACAAAGCTGGAGGACTCAGCCATGTACTTCTGTGCCAGCAGGGCACAGGGGTCCGGGGTCAATCAGCCCCAGCATTTTGGTGAT	CASRAQGSGVNQPQHF	26	0.000298813	TCRBV02-01*01	TCRBD01-01*01	TCRBJ01-05*01
CGGTCCACAAAGCTGGAGGACTCAGCCATGTACTTCTGTGCCAGCAGTGAGGGCAGGGGGCATTACTATGGCTACACCTTCGGTTCG	CASSEGRGHYYGYTF	26	0.000298813	TCRBV02-01*01	TCRBD01-01*01	TCRBJ01-02*01
AGGCTGCTGTCGGCTGCTCCCTCCCAGACATCTGTGTACTTCTGTGCCAGCAGTTACTACGGGGGAGAGACCCAGTACTTCGGGCCA	CASSYYGGETQYF	26	0.000298813	TCRBV06-05*01	TCRBD02-01*01	TCRBJ02-05*01
AATTCCCTGGAGCTTGGTGACTCTGCTGTGTATTTCTGTGCCAGCAGCCAAGGGGACAGGGGAGCGTACGAGCAGTACTTCGGGCCG	CASSQGDRGAYEQYF	26	0.000298813	TCRBV03	TCRBD01-01*01	TCRBJ02-07*01
GTGAACGCCTTGTTGCTGGGGGACTCGGCCCTCTATCTCTGTGCCAGCAGCTCAACCAATCTGAACACTGAAGCTTTCTTTGGACAA	CASSSTNLNTEAFF	25	0.00028732	TCRBV05-06*01		TCRBJ01-01*01
CTGTCGGCTGCTCCCTCCCAGACATCTGTGTACTTCTGTGCCAGCAGGCAACAGGGCAACTATAATTCACCCCTCCACTTTGGGAAC	CASRQQGNYNSPLHF	25	0.00028732	TCRBV06-05*01	TCRBD01-01*01	TCRBJ01-06*01
GAGTCGCCCAGCCCCAACCAGACCTCTCTGTACTTCTGTGCCAGCATGCCGGGAGTGGGTTGGTACAATGAGCAGTTCTTCGGGCCA	CASMPGVGWYNEQFF	25	0.00028732	TCRBV27-01*01	TCRBD02-01*02	TCRBJ02-01*01
CTGGAGTCGCCCAGCCCCAACCAGACCTCTCTGTACTTCTGTGCCAGCAGTCCCCGGTGGGGGACTCACCCCCAGCATTTTGGTGAT	CASSPRWGTHPQHF	25	0.00028732	TCRBV27-01*01	TCRBD02-01	TCRBJ01-05*01
AGTGCCCATCCTGAAGACAGCAGCTTCTACATCTGCAGTGCTAGTTACGGGACAGCTACTAGCACAGATACGCAGTATTTTGGCCCA	CSASYGTATSTDTQYF	25	0.00028732	TCRBV20	TCRBD01-01*01	TCRBJ02-03*01
CTACACACCCTGCAGCCAGAAGACTCGGCCCTGTATCTCTGCGCCAGCAGCCAAGATTTAGGGGACACTGAAGCTTTCTTTGGACAA	CASSQDLGDTEAFF	24	0.000275827	TCRBV04-03*01	TCRBD01-01*01	TCRBJ01-01*01
CAGCGCACAGAGCAGGGGGACTCGGCCATGTATCTCTGTGCCAGCAGCTTAGGTACAGGGGTTTACACTGAAGCTTTCTTTGGACAA	CASSLGTGVYTEAFF	24	0.000275827	TCRBV07-09	TCRBD01-01*01	TCRBJ01-01*01
ACGTTGGCGTCTGCTGTACCCTCTCAGACATCTGTGTACTTCTGTGCCAGCAGTGACTCGGGGACAGATACGCAGTATTTTGGCCCA	CASSDSGTDTQYF	24	0.000275827	TCRBV06-04		TCRBJ02-03*01
ACCAACCAGACATCTATGTACCTCTGTGCCAGCAGTCCCACGCGACAGCGGGGGGGTTGGCCGTACAATGAGCAGTTCTTCGGGCCA	CASSPTRQRGGWPYNEQFF	24	0.000275827	TCRBV28-01*01	TCRBD02-01*01	TCRBJ02-01*01
ACCAGTGCCCATCCTGAAGACAGCAGCTTCTACATCTGCAGTGCTAGGGCCTTAGCGGGGGACTCCTACGAGCAGTACTTCGGGCCG	CSARALAGDSYEQYF	24	0.000275827	TCRBV20	TCRBD02-01*01	TCRBJ02-07*01
CTGAAGATCCAGCCCTCAGAACCCAGGGACTCAGCTGTGTACTTCTGTGCCAGCACCCCTGGGGGGTACGAGCAGTACTTCGGGCCG	CASTPGGYEQYF	24	0.000275827	TCRBV12	TCRBD02-01*01	TCRBJ02-07*01
GCCCTGCAGCCAGAAGACTCAGCCCTGTATCTCTGCGCCAGCAGCCAAGCACCGACAGGGGTCACCGGGGAGCTGTTTTTTGGAGAA	CASSQAPTGVTGELFF	23	0.000264334	TCRBV04-01*01	TCRBD01-01*01	TCRBJ02-02*01
ACTCTCAAGATCCAGCCTGCAGAGCTTGGGGACTCGGCCATGTATCTCTGTGCCAGCAGCGAAACGGGGGCCAAGTTCTTCGGGCCA	CASSETGAKFF	23	0.000264334	TCRBV11-01*01		TCRBJ02-01*01
ATCCTGGAGTCGCCCAGCCCCAACCAGACCTCTCTGTACTTCTGTGCCAGCAGTTTCCAAGGTCCGGAAGGCTACACCTTCGGTTCG	CASSFQGPEGYTF	23	0.000264334	TCRBV27-01*01		TCRBJ01-02*01
ACGATCCAGCGCACACAGCAGGAGGACTCGGCCGTGTATCTCTGTGCCAGCAGTGCCTGGGAAAACTATGGCTACACCTTCGGTTCG	CASSAWENYGYTF	23	0.000264334	TCRBV07-02*01		TCRBJ01-02*01
AAGATCCAGCCTGCAAAGCTTGAGGACTCGGCCGTGTATCTCTGTGCCAGCAGCTTGATAGGCAACTATGGCTACACCTTCGGTTCG	CASSLIGNYGYTF	23	0.000264334	TCRBV11-02*02		TCRBJ01-02*01
GTGACCAGTGCCCATCCTGAAGACAGCAGCTTCTACATCTGCAGTGCCACGCGGGGTTCGACTAACTATGGCTACACCTTCGGTTCG	CSATRGSTNYGYTF	23	0.000264334	TCRBV20	TCRBD02-01*01	TCRBJ01-02*01
AGTGCCCATCCTGAAGACAGCAGCTTCTACATCTGCAGTGCTAGGCCTGTGGGCCCCGTCCTCAATCAGCCCCAGCATTTTGGTGAT	CSARPVGPVLNQPQHF	23	0.000264334	TCRBV20	TCRBD01-01*01	TCRBJ01-05*01
TCCCTAGAGTCTGCCATCCCCAACCAGACAGCTCTTTACTTCTGTGCCACCAGGAAAGACAGGAACACTGAAGCTTTCTTTGGACAA	CATRKDRNTEAFF	23	0.000264334	TCRBV24	TCRBD01-01*01	TCRBJ01-01*01
CAGCCAGAAGACTCGGCCCTGTATCTCTGTGCCAGCAGCCTCGGAGGGATAGCGGGGGCTGGCTCCTACGAGCAGTACTTCGGGCCG	CASSLGGIAGAGSYEQYF	22	0.000252842	TCRBV04-02*01	TCRBD02-01*01	TCRBJ02-07*01
CGCACAGAGCAGCGGGACTCGGCCATGTATCGCTGTGCCAGCAGCTTCGGGGCTTCAACCTCTGGAAACACCATATATTTTGGAGAG	CASSFGASTSGNTIYF	22	0.000252842	TCRBV07-06*01		TCRBJ01-03*01
CACGCCCTGCAGCCAGAAGACTCAGCCCTGTATCTCTGCGCCAGCAGCCTTGGGACAGGCCTTAATTCACCCCTCCACTTTGGGAAC	CASSLGTGLNSPLHF	22	0.000252842	TCRBV04-01*01	TCRBD01-01*01	TCRBJ01-06*01
GCCTTGGAGCTGGACGACTCGGCCCTGTATCTCTGTGCCAGCACCTATACAGGGGGCAAACGAAATGAAAAACTGTTTTTTGGCAGT	CASTYTGGKRNEKLFF	22	0.000252842	TCRBV05-04*01	TCRBD01-01*01	TCRBJ01-04*01
ATCCAGCGCACAGAGCAGGGGGACTCGGCCATGTATCTCTGTGCCAGCAGCTTAGATGGCTGGAGAGCCGAAGCTTTCTTTGGACAA	CASSLDGWRAEAFF	22	0.000252842	TCRBV07-09	TCRBD02-01*02	TCRBJ01-01*01
AATGTGAGCACCTTGGAGCTGGGGGACTCGGCCCTTTATCTTTGCGCCAGCAGCGTGGGACAGGGCTACGAGCAGTACTTCGGGCCG	CASSVGQGYEQYF	22	0.000252842	TCRBV05-01*01	TCRBD01-01*01	TCRBJ02-07*01
ACCAGTGCCCATCCTGAAGACAGCAGCTTCTACATCTGCAGTGCTAGCCGGAGTAGATTCGAGAATTCACCCCTCCACTTTGGGAAC	CSASRSRFENSPLHF	22	0.000252842	TCRBV20	TCRBD02-01*02	TCRBJ01-06*01
GCTCCCTCCCAAACATCTGTGTACTTCTGTGCCAGCACCTTTTCCCGAGACAGGGACGCTGGGGCCAACGTCCTGACTTTCGGGGCC	CASTFSRDRDAGANVLTF	22	0.000252842	TCRBV06	TCRBD01-01*01	TCRBJ02-06*01
CTGGGGGACGCAGCCATGTACCTGTGTGCCACCAGCAGAGATCCCACAGGGCCCACCTCTGGGGCCAACGTCCTGACTTTCGGGGCC	CATSRDPTGPTSGANVLTF	21	0.000241349	TCRBV15-01*01	TCRBD01-01*01	TCRBJ02-06*01
GCCCTGCAGCCAGAAGACTCAGCCCTGTATCTCTGCGCCAGCAGCCCGGGACAGGCGAGCTCCTACAATGAGCAGTTCTTCGGGCCA	CASSPGQASSYNEQFF	21	0.000241349	TCRBV04-01*01	TCRBD01-01*01	TCRBJ02-01*01
AGGCTGCTGTCGGCTGCTCCCTCCCAGACATCTGTGTACTTCTGTGCCAGCAGTTCTTTTCAGGGCACTGAAGCTTTCTTTGGACAA	CASSSFQGTEAFF	21	0.000241349	TCRBV06-05*01	TCRBD01-01*01	TCRBJ01-01*01
CTGCTGTCGGCTGCTCCCTCCCAGACATCTGTGTACTTCTGTGCCAGCAGCCCAGGACAGTATAATTCACCCCTCCACTTTGGGAAC	CASSPGQYNSPLHF	21	0.000241349	TCRBV06-05*01	TCRBD01-01*01	TCRBJ01-06*01
CGCACAGAGCAGGGGGACTCGGCCATGTATCTCTGTGCCAGCAGCTTGGGAAGCGGGGGGACCACCGGGGAGCTGTTTTTTGGAGAA	CASSLGSGGTTGELFF	21	0.000241349	TCRBV07-09	TCRBD02-01*01	TCRBJ02-02*01
ACCTTGGAGATCCAGCGCACAGAGCAGGGGGACTCGGCCATGTATCTCTGTGCCAGCAGCTTAAACAATGAGCAGTTCTTCGGGCCA	CASSLNNEQFF	21	0.000241349	TCRBV07-09		TCRBJ02-01*01
ACTGTGACATCGGCCCAAAAGAACCCGACAGCTTTCTATCTCTGTGCCAGTAGTCCTGGGTCTAACTATGGCTACACCTTCGGTTCG	CASSPGSNYGYTF	21	0.000241349	TCRBV19-01		TCRBJ01-02*01
AATTCCCTGGAGCTTGGTGACTCTGCTGTGTATTTCTGTGCCAGCAGTTATGCAGGGGGCTCTGGAAACACCATATATTTTGGAGAG	CASSYAGGSGNTIYF	21	0.000241349	TCRBV03	TCRBD01-01*01	TCRBJ01-03*01
AATTCCCTGGAGCTTGGTGACTCTGCTGTGTATTTCTGTGCCAGCAGCCAAGTCCAGGCGTCTGGAAACACCATATATTTTGGAGAG	CASSQVQASGNTIYF	21	0.000241349	TCRBV03	TCRBD01-01*01	TCRBJ01-03*01
CTGGGGTTGGAGTCGGCTGCTCCCTCCCAAACATCTGTGTACTTCTGTGCCAGCAGCACAGGGGTCTCACCCCTCCACTTTGGGAAC	CASSTGVSPLHF	21	0.000241349	TCRBV06	TCRBD01-01*01	TCRBJ01-06*01
ATCCAGCCCTCAGAACCCAGGGACTCAGCTGTGTACTTCTGTGCCAGCAGTTTATGGCAAGTCAATCAGCCCCAGCATTTTGGTGAT	CASSLWQVNQPQHF	21	0.000241349	TCRBV12	TCRBD01-01*01	TCRBJ01-05*01
AATGCCTTGGAGCTGGAGGACTCGGCCCTGTATCTCTGTGCCAGCAGCTTGTTCGGAGCCCCTGAGACTGAAGCTTTCTTTGGACAA	CASSLFGAPETEAFF	20	0.000229856	TCRBV05-08*01	TCRBD02-01*02	TCRBJ01-01*01
CACACCCTGCAGCCAGAAGACTCGGCCCTGTATCTCTGCGCCAGCAGCCAAGATCGGGGCCCCTCCTACGAGCAGTACTTCGGGCCG	CASSQDRGPSYEQYF	20	0.000229856	TCRBV04-03*01		TCRBJ02-07*01
GCTACCCGCTCCCAGACATCTGTGTATTTCTGCGCCAGCAGTGAGGCGCCATCCGGGACAGTGAACACTGAAGCTTTCTTTGGACAA	CASSEAPSGTVNTEAFF	20	0.000229856	TCRBV10-02*01	TCRBD01-01*01	TCRBJ01-01*01
CTGGAGTCCGCCAGCACCAACCAGACATCTATGTACCTCTGTGCCAGCAGCAAAACAGGGGGAAGTACTGAAGCTTTCTTTGGACAA	CASSKTGGSTEAFF	20	0.000229856	TCRBV28-01*01	TCRBD01-01*01	TCRBJ01-01*01
CGCACACAGCAGGAGGACTCGGCCGTGTATCTCTGTGCCAGCAGCTACGGACTAGCGGGGAATGCAGATACGCAGTATTTTGGCCCA	CASSYGLAGNADTQYF	20	0.000229856	TCRBV07-02*01	TCRBD02-01*01	TCRBJ02-03*01
ATCCAGCCCTCAGAACCCAGGGACTCAGCTGTGTACTTCTGTGCCAGCAGTTTAGGCGCAGGGATTTCGCCCCAGCATTTTGGTGAT	CASSLGAGISPQHF	20	0.000229856	TCRBV12	TCRBD01-01*01	TCRBJ01-05*01
ACCAGTGCCCATCCTGAAGACAGCAGCTTCTACATCTGCAGTGCTCCGGGACAGGGTACAATGAACACTGAAGCTTTCTTTGGACAA	CSAPGQGTMNTEAFF	20	0.000229856	TCRBV20	TCRBD01-01*01	TCRBJ01-01*01
CTGAAGATCCGGTCCACAAAGCTGGAGGACTCAGCCATGTACTTCTGTGCCAGCAGTGATCCCGGGTTCGGCTACACCTTCGGTTCG	CASSDPGFGYTF	19	0.000218363	TCRBV02-01*01	TCRBD02-01	TCRBJ01-02*01
CGGTCCACAAAGCTGGAGGACTCAGCCATGTACTTCTGTGCCAGCCTACCTACTAGCGACATCTACAATGAGCAGTTCTTCGGGCCA	CASLPTSDIYNEQFF	19	0.000218363	TCRBV02-01*01	TCRBD02-01	TCRBJ02-01*01
GTGAGCACCTTGGAGCTGGGGGACTCGGCCCTTTATCTTTGCGCCAGCAGCAGGACAGGGGAGGTCTACGAGCAGTACTTCGGGCCG	CASSRTGEVYEQYF	19	0.000218363	TCRBV05-01*01	TCRBD01-01*01	TCRBJ02-07*01
CTGGAGTCGCCCAGCCCCAACCAGACCTCTCTGTACTTCTGTGCCAGCAGTCCAGTCGACAGTTTAGAGACCCAGTACTTCGGGCCA	CASSPVDSLETQYF	19	0.000218363	TCRBV27-01*01	TCRBD01-01*01	TCRBJ02-05*01
TCGCCCAGCCCCAACCAGACCTCTCTGTACTTCTGTGCCAGCAGTTTGTGGTATCCCTCCTATAATTCACCCCTCCACTTTGGGAAC	CASSLWYPSYNSPLHF	19	0.000218363	TCRBV27-01*01		TCRBJ01-06*01
ACAGTGACCAGTGCCCATCCTGAAGACAGCAGCTTCTACATCTGCAGTGCTAGAGGGGTGGTGGACACTGAAGCTTTCTTTGGACAA	CSARGVVDTEAFF	19	0.000218363	TCRBV20		TCRBJ01-01*01
CTGGAGCTTGGTGACTCTGCTGTGTATTTCTGTGCCAGCAGCAACTACGAAGGACTAGCGTCCCCAGATACGCAGTATTTTGGCCCA	CASSNYEGLASPDTQYF	19	0.000218363	TCRBV03	TCRBD02-01	TCRBJ02-03*01
CTTCACCTACACACCCTGCAGCCAGAAGACTCGGCCCTGTATCTCTGTGCCAGCAGCCAAGTTGGGGATACGCAGTATTTTGGCCCA	CASSQVGDTQYF	18	0.00020687	TCRBV04-02*01		TCRBJ02-03*01
CACACCCTGCAGCCAGAAGACTCGGCCCTGTATCTCTGCGCCAGCAAATCCGGGACCCCGGATCCCCACGAGCAGTACTTCGGGCCG	CASKSGTPDPHEQYF	18	0.00020687	TCRBV04-03*01		TCRBJ02-07*01
CTGAGCTCTCTGGAGCTGGGGGACTCAGCTTTGTATTTCTGTGCCAGCAGCGTAGATGGCGCTAATCAGCCCCAGCATTTTGGTGAT	CASSVDGANQPQHF	18	0.00020687	TCRBV09-01		TCRBJ01-05*01
CTGAGCTCTCTGGAGCTGGGGGACTCAGCTTTGTATTTCTGTGCCAGCAGCGTAAGCGACAGTATGAATGAGCAGTTCTTCGGGCCA	CASSVSDSMNEQFF	18	0.00020687	TCRBV09-01	TCRBD01-01*01	TCRBJ02-01*01
AACGCCTTGGAGCTGGACGACTCGGCCCTGTATCTCTGTGCCAGCAGCCACTCGGGGGGAGGTAATGAAAAACTGTTTTTTGGCAGT	CASSHSGGGNEKLFF	18	0.00020687	TCRBV05-04*01	TCRBD02-01*01	TCRBJ01-04*01
GAGTTGGCTGCTCCCTCCCAGACATCTGTGTACTTCTGTGCCAGCATAGGGTCCCTACTTTTGAACACTGAAGCTTTCTTTGGACAA	CASIGSLLLNTEAFF	18	0.00020687	TCRBV06-06		TCRBJ01-01*01
GCAGAACTGGAGGATTCTGGAGTTTATTTCTGTGCCAGCAGCCCCAGATTTTCGGGGACAGGGGTCCACGAGCAGTACTTCGGGCCG	CASSPRFSGTGVHEQYF	18	0.00020687	TCRBV14-01*01	TCRBD01-01*01	TCRBJ02-07*01
CTGGAGTCAGCTACCCGCTCCCAGACATCTGTGTATTTCTGCGCCAGCAGTGAGGCAGAGAATAATTCACCCCTCCACTTTGGGAAC	CASSEAENNSPLHF	18	0.00020687	TCRBV10-02*01		TCRBJ01-06*01
CGCACAGAGCAGGGGGACTCGGCCATGTATCTCTGTGCCAGCAGCTTAGCATTGGTACAGGGGGCTGGAAAACTGTTTTTTGGCAGT	CASSLALVQGAGKLFF	18	0.00020687	TCRBV07-09	TCRBD01-01*01	TCRBJ01-04*01
ATCCAGCGCACAGAGCAGGGGGACTCGGCCATGTATCTCTGTGCCAGCAGCCCCGTCTCTGGGGCCAACGTCCTGACTTTCGGGGCC	CASSPVSGANVLTF	18	0.00020687	TCRBV07-09	TCRBD02-01	TCRBJ02-06*01
ATCCTGGAGTCGCCCAGCCCCAACCAGACCTCTCTGTACTTCTGTGCCAGCAGTTTTGATACAGGGTTTGGCTACACCTTCGGTTCG	CASSFDTGFGYTF	18	0.00020687	TCRBV27-01*01	TCRBD01-01*01	TCRBJ01-02*01
ACGATCCAGCGCACACAGCAGGAGGACTCGGCCGTGTATCTCTGTGCCAGCAGCTCCGGGACAGGGTATGGCTACACCTTCGGTTCG	CASSSGTGYGYTF	18	0.00020687	TCRBV07-02*01	TCRBD01-01*01	TCRBJ01-02*01
AATTCCCTGGAGCTTGGTGACTCTGCTGTGTATTTCTGTGCCAGCAGCCCTGACAGGGCTGCCGGAAACACCATATATTTTGGAGAG	CASSPDRAAGNTIYF	18	0.00020687	TCRBV03	TCRBD01-01*01	TCRBJ01-03*01
ACAGTGACCAGTGCCCATCCTGAAGACAGCAGCTTCTACATCTGCAGTGCCTCAGGGAATAGGAACACTGAAGCTTTCTTTGGACAA	CSASGNRNTEAFF	18	0.00020687	TCRBV20	TCRBD01-01*01	TCRBJ01-01*01
GTGAGTGCCTTGGAGCTGGGGGACTCGGCCCTGTATCTCTGTGCCAGAAGCTGCCGGGACAGGATCTCCGAGCAGTACTTCGGGCCG	CARSCRDRISEQYF	17	0.000195378	TCRBV05-03	TCRBD01-01*01	TCRBJ02-07*01
GCCTTGTTGCTGGGGGACTCGGCCCTCTATCTCTGTGCCAGCAGCTTGAAACCGGGACTTTTACAAGAGACCCAGTACTTCGGGCCA	CASSLKPGLLQETQYF	17	0.000195378	TCRBV05-06*01	TCRBD02-01	TCRBJ02-05*01
AGGCTGGAGTCGGCTGCTCCCTCCCAGACATCTGTGTACTTCTGTGCCAGCAGTGTGGTACAGGGGCCCGAGCAGTACTTCGGGCCG	CASSVVQGPEQYF	17	0.000195378	TCRBV06-01*01	TCRBD01-01*01	TCRBJ02-07*01
CTCACTCTGGAGTCAGCTACCCGCTCCCAGACATCTGTGTATTTCTGCGCCAGCAGTTCCGAAAATCAGCCCCAGCATTTTGGTGAT	CASSSENQPQHF	17	0.000195378	TCRBV10-02*01		TCRBJ01-05*01
ACCTTGGAGCTGGGGGACTCGGCCCTTTATCTTTGCGCCAGCATCCCACTTCCAGGGGACTCAGGGTTCGGCTACACCTTCGGTTCG	CASIPLPGDSGFGYTF	17	0.000195378	TCRBV05-01*01		TCRBJ01-02*01
CTGGAGTCCGCCAGCACCAACCAGACATCTATGTACCTCTGTGCCAGCAGACCGCAACAGGGGAGTTCACCCCTCCACTTTGGGAAC	CASRPQQGSSPLHF	17	0.000195378	TCRBV28-01*01	TCRBD01-01*01	TCRBJ01-06*01
ATCCAGCGCACACAGCAGGAGGACTCGGCCGTGTATCTCTGTGCCAGCAGCTTAGGCGACACGAAGGCGCGAGCTTTCTTTGGACAA	CASSLGDTKARAFF	17	0.000195378	TCRBV07-02*01	TCRBD01-01*01	TCRBJ01-01*01
GCCCAAAAGAACCCGACAGCTTTCTATCTCTGTGCCAGTAGTATGGCTGGGACAGGGGTAGGGAATTCACCCCTCCACTTTGGGAAC	CASSMAGTGVGNSPLHF	17	0.000195378	TCRBV19-01	TCRBD01-01*01	TCRBJ01-06*01
CCTCTCACTGTGACATCGGCCCAAAAGAACCCGACAGCTTTCTATCTCTGTGCCAGTAGTATGTCTGTTACGCAGTATTTTGGCCCA	CASSMSVTQYF	17	0.000195378	TCRBV19-01	TCRBD02-01	TCRBJ02-03*01
ACATCGGCCCAAAAGAACCCGACAGCTTTCTATCTCTGTGCCAGTAGTATAGCGGGGGGGCACACCGGGGAGCTGTTTTTTGGAGAA	CASSIAGGHTGELFF	17	0.000195378	TCRBV19-01	TCRBD02-01*01	TCRBJ02-02*01
CAGCCAGAAGACTCGGCCCTGTATCTCTGCGCCAGCAGCCCGGGACTAGCGGGGGGCCCGGACACCGGGGAGCTGTTTTTTGGAGAA	CASSPGLAGGPDTGELFF	16	0.000183885	TCRBV04-03*01	TCRBD02-01*01	TCRBJ02-02*01
TCTCTGGAGCTGGGGGACTCAGCTTTGTATTTCTGTGCCAGCAGCGCATTCGTAGCGGGGGCAAACAATGAGCAGTTCTTCGGGCCA	CASSAFVAGANNEQFF	16	0.000183885	TCRBV09-01	TCRBD02-01*01	TCRBJ02-01*01
CTGGAGTCGGCTGCTCCCTCCCAGACATCTGTGTACTTCTGTGCCAGCAGTGTCGGACAGGGGGCCTACGGCTACACCTTCGGTTCG	CASSVGQGAYGYTF	16	0.000183885	TCRBV06-01*01	TCRBD01-01*01	TCRBJ01-02*01
CAGCAGGTAGTGCGAGGAGATTCGGCAGCTTATTTCTGTGCCAGCTCACCAACAAGGGGAGCAGCCTACGAGCAGTACTTCGGGCCG	CASSPTRGAAYEQYF	16	0.000183885	TCRBV18-01*01		TCRBJ02-07*01
CTGCTGTCGGCTGCTCCCTCCCAGACATCTGTGTACTTCTGTGCCAGCAGAAACGGTCTTCCGCCCCGGGAGCAGTACTTCGGGCCG	CASRNGLPPREQYF	16	0.000183885	TCRBV06-05*01	TCRBD02-01	TCRBJ02-07*01
AGGCTGCTGTCGGCTGCTCCCTCCCAGACATCTGTGTACTTCTGTGCCAGCAACCCGGCGGGGAGGAACGAGCAGTACTTCGGGCCG	CASNPAGRNEQYF	16	0.000183885	TCRBV06-05*01	TCRBD02-01	TCRBJ02-07*01
ACTCTGACAGTGACCAGTGCCCATCCTGAAGACAGCAGCTTCTACATCTGCAGTTTGAGGACAGTGTATGGCTACACCTTCGGTTCG	CSLRTVYGYTF	16	0.000183885	TCRBV20-01*01	TCRBD01-01*01	TCRBJ01-02*01
GAGATCCAGCGCACAGAGCAGGGGGACTCGGCCATGTATCTCTGTGCCAGCAGCTTTCAACAGGACACTGAAGCTTTCTTTGGACAA	CASSFQQDTEAFF	16	0.000183885	TCRBV07-09	TCRBD01-01*01	TCRBJ01-01*01
GTGAGCACCTTGGAGCTGGGGGACTCGGCCCTTTATCTTTGCGCCAGCAGCTTGTTAGGGCAGAATTCACCCCTCCACTTTGGGAAC	CASSLLGQNSPLHF	16	0.000183885	TCRBV05-01*01		TCRBJ01-06*01
ACTGTGAGCAACATGAGCCCTGAAGACAGCAGCATATATCTCTGCAGCGTTGAAGGAACGGGGTTTCCTGGCTACACCTTCGGTTCG	CSVEGTGFPGYTF	16	0.000183885	TCRBV29-01*01	TCRBD02-01*01	TCRBJ01-02*01
GTGAGCAACATGAGCCCTGAAGACAGCAGCATATATCTCTGCAGCGTTGTTGGTAGCGGGGGTGGAGAGACCCAGTACTTCGGGCCA	CSVVGSGGGETQYF	16	0.000183885	TCRBV29-01*01	TCRBD02-01*01	TCRBJ02-05*01
ACTGTGAGCAACATGAGCCCTGAAGACAGCAGCATATATCTCTGCAGCGTTACGGACTCTGGGGCCAACGTCCTGACTTTCGGGGCC	CSVTDSGANVLTF	16	0.000183885	TCRBV29-01*01		TCRBJ02-06*01
ACGATCCAGCGCACACAGCAGGAGGACTCGGCCGTGTATCTCTGTGCCAGCAGCCAAGGGACTAGATATGAGCAGTTCTTCGGGCCA	CASSQGTRYEQFF	16	0.000183885	TCRBV07-02*01	TCRBD02-01	TCRBJ02-01*01
TCGGCCCAAAAGAACCCGACAGCTTTCTATCTCTGTGCCAGTAGTCCGCCTACCTGGACAGGACATTCACCCCTCCACTTTGGGAAC	CASSPPTWTGHSPLHF	16	0.000183885	TCRBV19-01	TCRBD01-01*01	TCRBJ01-06*01
ACATCGGCCCAAAAGAACCCGACAGCTTTCTATCTCTGTGCCAGTAGAACAGACCCAGGGCCTAATGAAAAACTGTTTTTTGGCAGT	CASRTDPGPNEKLFF	16	0.000183885	TCRBV19-01	TCRBD01-01*01	TCRBJ01-04*01
AACATGAGCTCCTTGGAGCTGGGGGACTCAGCCCTGTACTTCTGTGCCAGCAGCACGACAGGGATCACTGAAGCTTTCTTTGGACAA	CASSTTGITEAFF	16	0.000183885	TCRBV13-01*01	TCRBD01-01*01	TCRBJ01-01*01
ATCAATTCCCTGGAGCTTGGTGACTCTGCTGTGTATTTCTGTGCCAGCAGCCAAGTTACCAGGGGTGAGACCCAGTACTTCGGGCCA	CASSQVTRGETQYF	16	0.000183885	TCRBV03	TCRBD01-01*01	TCRBJ02-05*01
ATCCAGCCCTCAGAACCCAGGGACTCAGCTGTGTACTTCTGTGCCAGCAGTCGGACAGGCCTGGGCTACGAGCAGTACTTCGGGCCG	CASSRTGLGYEQYF	16	0.000183885	TCRBV12	TCRBD01-01*01	TCRBJ02-07*01
CAGCCCTCAGAACCCAGGGACTCAGCTGTGTACTTCTGTGCCAGCACCGGGGGGGTGTCTACTCGGGAGACCCAGTACTTCGGGCCA	CASTGGVSTRETQYF	16	0.000183885	TCRBV12	TCRBD02-01*01	TCRBJ02-05*01
CTGGGGTTGGAGTCGGCTGCTCCCTCCCAAACATCTGTGTACTTCTGTGCCAGCAGCCGTTCGGGCGATGGCTACACCTTCGGTTCG	CASSRSGDGYTF	16	0.000183885	TCRBV06		TCRBJ01-02*01
CCGCTCAGGCTGGAGTTGGCTGCTCCCTCCCAGACATCTGTGTACTTCTGTGCCAGCCTTGCTGGCAATGAGCAGTTCTTCGGGCCA	CASLAGNEQFF	15	0.000172392	TCRBV06-06		TCRBJ02-01*01
CTGAAGGTGCAGCCTGCAGAACTGGAGGATTCTGGAGTTTATTTCTGTGCCAGCAGCCACAGGGGAAACACCATATATTTTGGAGAG	CASSHRGNTIYF	15	0.000172392	TCRBV14-01*01	TCRBD01-01*01	TCRBJ01-03*01
AACGCCTTGGAGCTGGACGACTCGGCCCTGTATCTCTGTGCCAGCAGAAGACAGGGACAAGGAGGCTCACCCCTCCACTTTGGGAAC	CASRRQGQGGSPLHF	15	0.000172392	TCRBV05-04*01	TCRBD01-01*01	TCRBJ01-06*01
CTGTCGGCTGCTCCCTCCCAGACATCTGTGTACTTCTGTGCCAGCAGTTACGGGCCAGAAGCCAAAAACATTCAGTACTTCGGCGCC	CASSYGPEAKNIQYF	15	0.000172392	TCRBV06-05*01	TCRBD01-01*01	TCRBJ02-04*01
CTGGAGTCGCCCAGCCCCAACCAGACCTCTCTGTACTTCTGTGCCAGCAGCCTCGGGGGGTCATACAATGAGCAGTTCTTCGGGCCA	CASSLGGSYNEQFF	15	0.000172392	TCRBV27-01*01	TCRBD02-01*01	TCRBJ02-01*01
CAGCGCACACAGCAGGAGGACTCGGCCGTGTATCTCTGTGCCAGCAGCTTAGACGGCGGGCGATATTCACCCCTCCACTTTGGGAAC	CASSLDGGRYSPLHF	15	0.000172392	TCRBV07-02*01	TCRBD02-01	TCRBJ01-06*01
CACATCAATTCCCTGGAGCTTGGTGACTCTGCTGTGTATTTCTGTGCCAGCAGCCTCGGACAGAATTCACCCCTCCACTTTGGGAAC	CASSLGQNSPLHF	15	0.000172392	TCRBV03	TCRBD01-01*01	TCRBJ01-06*01
CAGCCCTCAGAACCCAGGGACTCAGCTGTGTACTTCTGTGCCAGCAGTAGAAGCGGGGGGAAATACAATGAGCAGTTCTTCGGGCCA	CASSRSGGKYNEQFF	15	0.000172392	TCRBV12	TCRBD02-01*01	TCRBJ02-01*01
AATCTTCACATCAATTCCCTGGAGCTTGGTGACTCTGCTGTGTATTTCTGTGCCAGCAGCCAAATGGATGGCTACACCTTCGGTTCG	CASSQMDGYTF	15	0.000172392	TCRBV03		TCRBJ01-02*01
GTGACCAGTGCCCATCCTGAAGACAGCAGCTTCTACATCTGCAGTGCTTCTCCGACTAGCGGGATAAAGACCCAGTACTTCGGGCCA	CSASPTSGIKTQYF	15	0.000172392	TCRBV20	TCRBD02-01*02	TCRBJ02-05*01
GCTGCTCCCTCCCAAACATCTGTGTACTTCTGTGCCAGCAGTCGCGCAATCGGCGGGGGGGCCTTAAACGAGCAGTACTTCGGGCCG	CASSRAIGGGALNEQYF	15	0.000172392	TCRBV06	TCRBD02-01*01	TCRBJ02-07*01
CTGGAGCTGGGGGACTCAGCTTTGTATTTCTGTGCCAGCAGCGTATCCGCCCGGGGGGCAGGGGACTATGGCTACACCTTCGGTTCG	CASSVSARGAGDYGYTF	14	0.000160899	TCRBV09-01	TCRBD02-01*01	TCRBJ01-02*01
GAGCTGAATGTGAACGCCTTGGAGCTGGACGACTCGGCCCTGTATCTCTGTGCCAGCGGAGAGAACACTGAAGCTTTCTTTGGACAA	CASGENTEAFF	14	0.000160899	TCRBV05-04*01	TCRBD02-01*02	TCRBJ01-01*01
AATGTGAACGCCTTGGAGCTGGACGACTCGGCCCTGTATCTCTGTGCCAGCAGCGCGGGGACAGCGGTTGGCTACACCTTCGGTTCG	CASSAGTAVGYTF	14	0.000160899	TCRBV05-04*01	TCRBD01-01*01	TCRBJ01-02*01
AGGCTGGAGTCGGCTGCTCCCTCCCAGACATCTGTGTACTTCTGTGCCAGCAGTTATATGTCCAACTATGGCTACACCTTCGGTTCG	CASSYMSNYGYTF	14	0.000160899	TCRBV06-01*01	TCRBD02-01	TCRBJ01-02*01
AAGATCCAGCGCACAGAGCGGGGGGACTCAGCCGTGTATCTCTGTGCCAGCAGCAATTCCGGGACAGTGCAGCAGTACTTCGGGCCG	CASSNSGTVQQYF	14	0.000160899	TCRBV07-03*01	TCRBD01-01*01	TCRBJ02-07*01
TTGGCGTCTGCTGTACCCTCTCAGACATCTGTGTACTTCTGTGCCAGCAGTGAACAGGGGGACACAGATACGCAGTATTTTGGCCCA	CASSEQGDTDTQYF	14	0.000160899	TCRBV06-04	TCRBD01-01*01	TCRBJ02-03*01
ACGTTGGCGTCTGCTGTACCCTCTCAGACATCTGTGTACTTCTGTGCCAGCAGTGAGTATAGCAATCAGCCCCAGCATTTTGGTGAT	CASSEYSNQPQHF	14	0.000160899	TCRBV06-04	TCRBD02-01	TCRBJ01-05*01
TCGGCTGCTCCCTCCCAGACATCTGTGTACTTCTGTGCCAGCAGTTATGTCAGGACAGGGGGCAACTATGGCTACACCTTCGGTTCG	CASSYVRTGGNYGYTF	14	0.000160899	TCRBV06-05*01	TCRBD01-01*01	TCRBJ01-02*01
TTGGAGATCCAGCGCACAGAGCAGGGGGACTCGGCCATGTATCTCTGTGCCAGCAGCTTAACAAGCGGTGAGCAGTTCTTCGGGCCA	CASSLTSGEQFF	14	0.000160899	TCRBV07-09	TCRBD02-01	TCRBJ02-01*01
ATCCAGCGCACAGAGCAGGGGGACTCGGCCATGTATCTCTGTGCCAGCAGCCCCCAGGGAAGTTCTTCACCCCTCCACTTTGGGAAC	CASSPQGSSSPLHF	14	0.000160899	TCRBV07-09	TCRBD01-01*01	TCRBJ01-06*01
ATCCAGCGCACAGAGCAGGGGGACTCGGCCATGTATCTCTGTGCCAGCAGCCCTGGTGTAGGAATAGATACGCAGTATTTTGGCCCA	CASSPGVGIDTQYF	14	0.000160899	TCRBV07-09		TCRBJ02-03*01
ATCCAGGCTACGAAGCTTGAGGATTCAGCAGTGTATTTTTGTGCCAGCATTACCGGGACGGAAACTTACGAGCAGTACTTCGGGCCG	CASITGTETYEQYF	14	0.000160899	TCRBV16-01		TCRBJ02-07*01
AGCACCTTGGAGCTGGGGGACTCGGCCCTTTATCTTTGCGCCAGCAGCACCGGGACATCCCTCGGGTACGAGCAGTACTTCGGGCCG	CASSTGTSLGYEQYF	14	0.000160899	TCRBV05-01*01	TCRBD01-01*01	TCRBJ02-07*01
GACTCGGCCCTTTATCTTTGCGCCAGCAGCTTGCCCCCGCGAGGGCTAGCGGGGGGCAAGAACACCGGGGAGCTGTTTTTTGGAGAA	CASSLPPRGLAGGKNTGELFF	14	0.000160899	TCRBV05-01*01	TCRBD02-01*01	TCRBJ02-02*01
AGCACCTTGGAGCTGGGGGACTCGGCCCTTTATCTTTGCGCCAGCAGCCCCGGACAGGGGTTAAACACTGAAGCTTTCTTTGGACAA	CASSPGQGLNTEAFF	14	0.000160899	TCRBV05-01*01	TCRBD01-01*01	TCRBJ01-01*01
ACTGTGAGCAACATGAGCCCTGAAGACAGCAGCATATATCTCTGCAGCGCTGGAGGACAGGGCGCCCATGGCTACACCTTCGGTTCG	CSAGGQGAHGYTF	14	0.000160899	TCRBV29-01*01	TCRBD01-01*01	TCRBJ01-02*01
TCGGCCCAAAAGAACCCGACAGCTTTCTATCTCTGTGCCAGTAGTATAACCGGGACTAGCGGGGCGGATGAGCAGTTCTTCGGGCCA	CASSITGTSGADEQFF	14	0.000160899	TCRBV19-01	TCRBD02-01*01	TCRBJ02-01*01
ACCCTGGAGTCTGCCAGGCCCTCACATACCTCTCAGTACCTCTGTGCCAGCAGTGAGGGCGGAAACTATGGCTACACCTTCGGTTCG	CASSEGGNYGYTF	14	0.000160899	TCRBV25-01*01		TCRBJ01-02*01
TCCCTGGAGCTTGGTGACTCTGCTGTGTATTTCTGTGCCAGCAGCCAACGCCGGGGGGCCTACACAGATACGCAGTATTTTGGCCCA	CASSQRRGAYTDTQYF	14	0.000160899	TCRBV03	TCRBD02-01*01	TCRBJ02-03*01
ACCAGTGCCCATCCTGAAGACAGCAGCTTCTACATCTGCAGTGCTATTCCCGGGACAGGGATGAACACTGAAGCTTTCTTTGGACAA	CSAIPGTGMNTEAFF	14	0.000160899	TCRBV20	TCRBD01-01*01	TCRBJ01-01*01
GTGACCAGTGCCCATCCTGAAGACAGCAGCTTCTACATCTGCAGTGCTAGGATGCCGACGGAGAACACTGAAGCTTTCTTTGGACAA	CSARMPTENTEAFF	14	0.000160899	TCRBV20		TCRBJ01-01*01
CACATCAATTCCCTGGAGCTTGGTGACTCTGCTGTGTATTTCTGTGCCAGCAGCTATAGACAGCCCGACGAGCAGTACTTCGGGCCG	CASSYRQPDEQYF	14	0.000160899	TCRBV03	TCRBD01-01*01	TCRBJ02-07*01
ATCCGCTCACCAGGCCTGGGGGACGCAGCCATGTACCTGTGTGCCACCAGCAGAAGCAGGGAGGGCACTGAAGCTTTCTTTGGACAA	CATSRSREGTEAFF	13	0.000149406	TCRBV15-01*01	TCRBD02-01*02	TCRBJ01-01*01
TTGTTGCTGGGGGACTCGGCCCTGTATCTCTGTGCCAGCAGCTTGGTGGCCAGCGGAACGTTCGGCGGGGAGCTGTTTTTTGGAGAA	CASSLVASGTFGGELFF	13	0.000149406	TCRBV05-05*01	TCRBD02-01	TCRBJ02-02*01
AATGTGAACGCCTTGTTGCTGGGGGACTCGGCCCTCTATCTCTGTGCCAGCAGCTTAAGCGGCTCCTACGAGCAGTACTTCGGGCCG	CASSLSGSYEQYF	13	0.000149406	TCRBV05-06*01	TCRBD02-01	TCRBJ02-07*01
GCCCTGCAGCCAGAAGACTCAGCCCTGTATCTCTGCGCCAGCAGCCAATCGGGACCGATCTCTGGAAACACCATATATTTTGGAGAG	CASSQSGPISGNTIYF	13	0.000149406	TCRBV04-01*01		TCRBJ01-03*01
CACGCCCTGCAGCCAGAAGACTCAGCCCTGTATCTCTGCGCCAGCAGCCAACTAGACACGAACACCGGGGAGCTGTTTTTTGGAGAA	CASSQLDTNTGELFF	13	0.000149406	TCRBV04-01*01		TCRBJ02-02*01
AGCTCTCTGGAGCTGGGGGACTCAGCTTTGTATTTCTGTGCCAGCAGCCCGATGGGGACAACTAATGAAAAACTGTTTTTTGGCAGT	CASSPMGTTNEKLFF	13	0.000149406	TCRBV09-01		TCRBJ01-04*01
CTGTCGGCTGCTCCCTCCCAGACATCTGTGTACTTCTGTGCCAGCAGTTACGGGGCGGGACTCTCCTACGAGCAGTACTTCGGGCCG	CASSYGAGLSYEQYF	13	0.000149406	TCRBV06-05*01	TCRBD02-01	TCRBJ02-07*01
TCCACAAAGCTGGAGGACTCAGCCATGTACTTCTGTGCCAGCAGACAACAGGGGGCCGGCATCAATCAGCCCCAGCATTTTGGTGAT	CASRQQGAGINQPQHF	13	0.000149406	TCRBV02-01*01	TCRBD01-01*01	TCRBJ01-05*01
CAGCGCACACAGCAGGAGGACTCCGCCGTGTATCTCTGTGCCAGCAGCCCTAGAAATTGGAGGCTCTATGGCTACACCTTCGGTTCG	CASSPRNWRLYGYTF	13	0.000149406	TCRBV07-08*01	TCRBD02-01*02	TCRBJ01-02*01
CAGGTAGTGCGAGGAGATTCGGCAGCTTATTTCTGTGCCAGCTCACAGAGACTAACCTTAAACACCGGGGAGCTGTTTTTTGGAGAA	CASSQRLTLNTGELFF	13	0.000149406	TCRBV18-01*01	TCRBD02-01	TCRBJ02-02*01
TCCACTCTGACAGTGACCAGTGCCCATCCTGAAGACAGCAGCTTCTACATCTGCAGTGCTAGTTACGATGAAGCTTTCTTTGGACAA	CSASYDEAFF	13	0.000149406	TCRBV20-01*01		TCRBJ01-01*01
ACGATTCAGCGCACAGAGCAGCGGGACTCAGCCATGTATCGCTGTGCCAGCAGCGTAGACAGGGACTCTGAAGCTTTCTTTGGACAA	CASSVDRDSEAFF	13	0.000149406	TCRBV07-07*01		TCRBJ01-01*01
TCCCTGATTCTGGAGTCCGCCAGCACCAACCAGACATCTATGTACCTCTGTGCCAGCAGTAACATCACTGAAGCTTTCTTTGGACAA	CASSNITEAFF	13	0.000149406	TCRBV28-01*01	TCRBD01-01*01	TCRBJ01-01*01
CTGGAGTCGCCCAGCCCCAACCAGACCTCTCTGTACTTCTGTGCCAGCAGTTTAGGGGGACAGAACTACGAGCAGTACTTCGGGCCG	CASSLGGQNYEQYF	13	0.000149406	TCRBV27-01*01	TCRBD01-01*01	TCRBJ02-07*01
GAGTCGCCCAGCCCCAACCAGACCTCTCTGTACTTCTGTGCCAGCAGTCGGCAGGGGGCGCACACCGGGGAGCTGTTTTTTGGAGAA	CASSRQGAHTGELFF	13	0.000149406	TCRBV27-01*01	TCRBD01-01*01	TCRBJ02-02*01
GTGAGCAACATGAGCCCTGAAGACAGCAGCATATATCTCTGCAGCGTTGAAGGACCCGATGCGGGGTTGGAGCAGTACTTCGGGCCG	CSVEGPDAGLEQYF	13	0.000149406	TCRBV29-01*01	TCRBD02-01*01	TCRBJ02-07*01
ACGATCCAGCGCACACAGCAGGAGGACTCGGCCGTGTATCTCTGTGCCAGCAGCCCAGGCCCGACCCCACCCCTCCACTTTGGGAAC	CASSPGPTPPLHF	13	0.000149406	TCRBV07-02*01	TCRBD01-01*01	TCRBJ01-06*01
ATCCAGCGCACACAGCAGGAGGACTCGGCCGTGTATCTCTGTGCCAGCAGCCCGCCAGGGAGGGGCACTGAAGCTTTCTTTGGACAA	CASSPPGRGTEAFF	13	0.000149406	TCRBV07-02*01	TCRBD02-01*02	TCRBJ01-01*01
TCGGCCCAAAAGAACCCGACAGCTTTCTATCTCTGTGCCAGTAGTATGGTAGGGACAGGGGACACCGGGGAGCTGTTTTTTGGAGAA	CASSMVGTGDTGELFF	13	0.000149406	TCRBV19-01	TCRBD01-01*01	TCRBJ02-02*01
ACATCGGCCCAAAAGAACCCGACAGCTTTCTATCTCTGTGCCAGTAGTATGGGACTAGCGCAGTCAAGGGAGCAGTTCTTCGGGCCA	CASSMGLAQSREQFF	13	0.000149406	TCRBV19-01	TCRBD02-01	TCRBJ02-01*01
ATCCAGCCCTCAGAACCCAGGGACTCAGCTGTGTACTTCTGTGCCAGCAGTATTCTGGGTAGCAATCAGCCCCAGCATTTTGGTGAT	CASSILGSNQPQHF	13	0.000149406	TCRBV12		TCRBJ01-05*01
CTGGAGCTTGGTGACTCTGCTGTGTATTTCTGTGCCAGCAGCCAAGATTGGACGGGAAGAGGAAATGAAAAACTGTTTTTTGGCAGT	CASSQDWTGRGNEKLFF	13	0.000149406	TCRBV03	TCRBD02-01*02	TCRBJ01-04*01
ATCCAGCCCTCAGAACCCAGGGACTCAGCTGTGTACTTCTGTGCCAGCGGGGGGTCAACGGGGCTTAATGAGCAGTTCTTCGGGCCA	CASGGSTGLNEQFF	13	0.000149406	TCRBV12	TCRBD02-01*01	TCRBJ02-01*01
GCTCCCTCCCAAACATCTGTGTACTTCTGTGCCAGCAGTTACTCGAGTGGGACAGGGGGCCTGAACACTGAAGCTTTCTTTGGACAA	CASSYSSGTGGLNTEAFF	13	0.000149406	TCRBV06	TCRBD01-01*01	TCRBJ01-01*01
ACAGTGACCAGTGCCCATCCTGAAGACAGCAGCTTCTACATCTGCAGTGCTAGTCTGTTAGTCACAGATACGCAGTATTTTGGCCCA	CSASLLVTDTQYF	13	0.000149406	TCRBV20	TCRBD02-01	TCRBJ02-03*01
CTTCACATCAATTCCCTGGAGCTTGGTGACTCTGCTGTGTATTTCTGTGCCAGCAGCCGCAGGGGCCACGAGCAGTACTTCGGGCCG	CASSRRGHEQYF	13	0.000149406	TCRBV03	TCRBD01-01*01	TCRBJ02-07*01
AATGTGAACGCCTTGTTGCTGGGGGACTCGGCCCTGTATCTCTGTGCCAGCAGCTTATTGGGGAGGCCACCCCTCCACTTTGGGAAC	CASSLLGRPPLHF	12	0.000137914	TCRBV05-05*01	TCRBD02-01*02	TCRBJ01-06*01
CTGGAGTCGGCTGCTCCCTCCCAGACATCTGTGTACTTCTGTGCCAGCAGTGAATGGCAGGGGGGGGCTGAAGCTTTCTTTGGACAA	CASSEWQGGAEAFF	12	0.000137914	TCRBV06-01*01		TCRBJ01-01*01
GCCTTGTTGCTGGGGGACTCGGCCCTCTATCTCTGTGCCAGCAGCACACTCTCGGGACAGGAGACTTCACCCCTCCACTTTGGGAAC	CASSTLSGQETSPLHF	12	0.000137914	TCRBV05-06*01	TCRBD01-01*01	TCRBJ01-06*01
CACGCCCTGCAGCCAGAAGACTCAGCCCTGTATCTCTGCGCCAGCAGCCAAGCTGCGACTAGCGGCTACGAGCAGTACTTCGGGCCG	CASSQAATSGYEQYF	12	0.000137914	TCRBV04-01*01	TCRBD02-01	TCRBJ02-07*01
ATCCAGCCTGCAGAGCTTGGGGACTCGGCCATGTATCTCTGTGCCAGCAGCCACAGGGGGAATAATTCACCCCTCCACTTTGGGAAC	CASSHRGNNSPLHF	12	0.000137914	TCRBV11-01*01	TCRBD01-01*01	TCRBJ01-06*01
CTGGAGTCGGCTGCTCCCTCCCAGACATCTGTGTACTTCTGTGCCAGCAGTGGGGACAGTGGGAATTCACCCCTCCACTTTGGGAAC	CASSGDSGNSPLHF	12	0.000137914	TCRBV06-01*01	TCRBD01-01*01	TCRBJ01-06*01
ACTCTGGAGTCTGCTGCCTCCTCCCAGACATCTGTATATTTCTGCGCCAGCAGTCTAACAGGGGGATCTGGCTACACCTTCGGTTCG	CASSLTGGSGYTF	12	0.000137914	TCRBV10-01	TCRBD01-01*01	TCRBJ01-02*01
CCGCTCAGGCTGGAGTTGGCTGCTCCCTCCCAGACATCTGTGTACTTCTGTGCCAGCAGCTTGGCCCAGAAAGCTTTCTTTGGACAA	CASSLAQKAFF	12	0.000137914	TCRBV06-06	TCRBD01-01*01	TCRBJ01-01*01
ATCCGGTCCACAAAGCTGGAGGACTCAGCCATGTACTTCTGTGCCAGCAGTGGAGGGGTTATTAATGAAAAACTGTTTTTTGGCAGT	CASSGGVINEKLFF	12	0.000137914	TCRBV02-01*01		TCRBJ01-04*01
AAGATCCGGTCCACAAAGCTGGAGGACTCAGCCATGTACTTCTGTGCCAGCAGTCAAGGGGAGAACACTGAAGCTTTCTTTGGACAA	CASSQGENTEAFF	12	0.000137914	TCRBV02-01*01		TCRBJ01-01*01
ACTCTGAAGGTGCAGCCTGCAGAACTGGAGGATTCTGGAGTTTATTTCTGTGCCAGCAGCCAGGACAATGAGCAGTTCTTCGGGCCA	CASSQDNEQFF	12	0.000137914	TCRBV14-01*01		TCRBJ02-01*01
CGGTCCACAAAGCTGGAGGACTCAGCCATGTACTTCTGTGCCAGCAGGGAAAGCGGGGGGGAGGTAGATACGCAGTATTTTGGCCCA	CASRESGGEVDTQYF	12	0.000137914	TCRBV02-01*01	TCRBD02-01*01	TCRBJ02-03*01
AGGCTGCTGTCGGCTGCTCCCTCCCAGACATCTGTGTACTTCTGTGCCAGCAGTTACTCCTATCAAGAGACCCAGTACTTCGGGCCA	CASSYSYQETQYF	12	0.000137914	TCRBV06-05*01	TCRBD02-01	TCRBJ02-05*01
TTGGAGCTGGGGGACTCGGCCCTTTATCTTTGCGCCAGCAGCACCTCTACCGGGGCCCAGGGAACCTACGAGCAGTACTTCGGGCCG	CASSTSTGAQGTYEQYF	12	0.000137914	TCRBV05-01*01		TCRBJ02-07*01
TTGGAGCTGGGGGACTCGGCCCTTTATCTTTGCGCCAGCAGCTTGGACCTTCCGGGACAGCCCAATTCACCCCTCCACTTTGGGAAC	CASSLDLPGQPNSPLHF	12	0.000137914	TCRBV05-01*01	TCRBD01-01*01	TCRBJ01-06*01
CTGGAGTCGCCCAGCCCCAACCAGACCTCTCTGTACTTCTGTGCCAATCAAAGGGACAGGCCTACCTACGAGCAGTACTTCGGGCCG	CANQRDRPTYEQYF	12	0.000137914	TCRBV27-01*01	TCRBD01-01*01	TCRBJ02-07*01
CTGACGATCCAGCGCACACAGCAGGAGGACTCGGCCGTGTATCTCTGTGCCAGCAGCTTAGCGGGGCCGGAGCAGTACTTCGGGCCG	CASSLAGPEQYF	12	0.000137914	TCRBV07-02*01	TCRBD01-01*01	TCRBJ02-07*01
ACTCTGACTGTGAGCAACATGAGCCCTGAAGACAGCAGCATATATCTCTGCAGCGTGGACGACAGGGGTGAGGCTTTCTTTGGACAA	CSVDDRGEAFF	12	0.000137914	TCRBV29-01*01	TCRBD01-01*01	TCRBJ01-01*01
GTGAGCAACATGAGCCCTGAAGACAGCAGCATATATCTCTGCAGCGTTGAGGGCAAACAGGGCCACTATGGCTACACCTTCGGTTCG	CSVEGKQGHYGYTF	12	0.000137914	TCRBV29-01*01	TCRBD01-01*01	TCRBJ01-02*01
ACGATCCAGCGCACACAGCAGGAGGACTCGGCCGTGTATCTCTGTGCCAGCAGACTGGAGGACACCGGGGAGCTGTTTTTTGGAGAA	CASRLEDTGELFF	12	0.000137914	TCRBV07-02*01	TCRBD02-01*02	TCRBJ02-02*01
CAGCCTGCAAAGCTTGAGGACTCGGCCGTGTATCTCTGTGCCAGCAGCTTAGATCATCACGGACTCTACGAGCAGTACTTCGGGCCG	CASSLDHHGLYEQYF	12	0.000137914	TCRBV11-02*02	TCRBD02-01	TCRBJ02-07*01
AAGATCCAGCCTGCAAAGCTTGAGGACTCGGCCGTGTATCTCTGTGCCAGCAGCTTAGGCCCTAATTCACCCCTCCACTTTGGGAAC	CASSLGPNSPLHF	12	0.000137914	TCRBV11-02*02		TCRBJ01-06*01
ATCCAGCCTGCAAAGCTTGAGGACTCGGCCGTGTATCTCTGTGCCAGCAGCGCCGGGACACCTGGGGAGACCCAGTACTTCGGGCCA	CASSAGTPGETQYF	12	0.000137914	TCRBV11-02*02	TCRBD01-01*01	TCRBJ02-05*01
ACATCGGCCCAAAAGAACCCGACAGCTTTCTATCTCTGTGCCAGTAGTATGACAGGGGGCCGAAATTCACCCCTCCACTTTGGGAAC	CASSMTGGRNSPLHF	12	0.000137914	TCRBV19-01	TCRBD01-01*01	TCRBJ01-06*01
AATTCCCTGGAGCTTGGTGACTCTGCTGTGTATTTCTGTGCCAGCAGCCAAGGGTATCGGGAGAATTCACCCCTCCACTTTGGGAAC	CASSQGYRENSPLHF	12	0.000137914	TCRBV03	TCRBD02-01*02	TCRBJ01-06*01
ACCAGTGCCCATCCTGAAGACAGCAGCTTCTACATCTGCAGTGCTAGAGTAGCGGGGGCCAGCCGCTACGAGCAGTACTTCGGGCCG	CSARVAGASRYEQYF	12	0.000137914	TCRBV20	TCRBD02-01*01	TCRBJ02-07*01
CTGAAGATCCAGCCCTCAGAACCCAGGGACTCAGCTGTGTACTTCTGTGCCAGCAGTTTATCGAGTGGTGGCTACACCTTCGGTTCG	CASSLSSGGYTF	12	0.000137914	TCRBV12	TCRBD02-01*02	TCRBJ01-02*01
ACAGTGACCAGTGCCCATCCTGAAGACAGCAGCTTCTACATCTGCAGTGCTAGAGAGGGAAGCACCGGGGAGCTGTTTTTTGGAGAA	CSAREGSTGELFF	12	0.000137914	TCRBV20		TCRBJ02-02*01
GAAGACTCAGCCCTGTATCTCTGCGCCAGCAGCCAAGACCCGGGACTAGCGGGGGGCGCGAACACCGGGGAGCTGTTTTTTGGAGAA	CASSQDPGLAGGANTGELFF	11	0.000126421	TCRBV04-01*01	TCRBD02-01*01	TCRBJ02-02*01
AACCTGAGCTCTCTGGAGCTGGGGGACTCAGCTTTGTATTTCTGTGCCAGCAGCGCTACGGTATCCGATACGCAGTATTTTGGCCCA	CASSATVSDTQYF	11	0.000126421	TCRBV09-01	TCRBD02-01	TCRBJ02-03*01
CTGAGCTCTCTGGAGCTGGGGGACTCAGCTTTGTATTTCTGTGCCAGCAGCGTAGGGGCAGGGGGCTACGAGCAGTACTTCGGGCCG	CASSVGAGGYEQYF	11	0.000126421	TCRBV09-01	TCRBD01-01*01	TCRBJ02-07*01
GAGTCGGCTGCTCCCTCCCAGACATCTGTGTACTTCTGTGCCAGCAGGACAGGGGGCTCTGGGGCCAACGTCCTGACTTTCGGGGCC	CASRTGGSGANVLTF	11	0.000126421	TCRBV06-01*01	TCRBD01-01*01	TCRBJ02-06*01
CAGCGCACAGAGCGGGGGGACTCAGCCGTGTATCTCTGTGCCAGCAGCCTCTCTCTGGGGGACACCGGGGAGCTGTTTTTTGGAGAA	CASSLSLGDTGELFF	11	0.000126421	TCRBV07-03*01		TCRBJ02-02*01
TCTGCTGCCTCCTCCCAGACATCTGTATATTTCTGCGCCAGCAGTGACCTTCCGAGGGAGGGCACAGATACGCAGTATTTTGGCCCA	CASSDLPREGTDTQYF	11	0.000126421	TCRBV10-01	TCRBD02-01*02	TCRBJ02-03*01
AAGATCCGGTCCACAAAGCTGGAGGACTCAGCCATGTACTTCTGTGCCAGAGGACAGGGAGGATCCTACGAGCAGTACTTCGGGCCG	CARGQGGSYEQYF	11	0.000126421	TCRBV02-01*01	TCRBD01-01*01	TCRBJ02-07*01
AAGATCCGGTCCACAAAGCTGGAGGACTCAGCCATGTACTTCTGTGCCAGCAGTGACGAGGGGTGGTATGGCTACACCTTCGGTTCG	CASSDEGWYGYTF	11	0.000126421	TCRBV02-01*01		TCRBJ01-02*01
ACGTTGGCGTCTGCTGTACCCTCTCAGACATCTGTGTACTTCTGTGCCAGCGGGGGGGCGGGCACAGATACGCAGTATTTTGGCCCA	CASGGAGTDTQYF	11	0.000126421	TCRBV06-04	TCRBD02-01*01	TCRBJ02-03*01
TTGGCGTCTGCTGTACCCTCTCAGACATCTGTGTACTTCTGTGCCAGCAGTGACTCTCAGGGCACAGATACGCAGTATTTTGGCCCA	CASSDSQGTDTQYF	11	0.000126421	TCRBV06-04	TCRBD01-01*01	TCRBJ02-03*01
AATGTGAGCACCTTGGAGCTGGGGGACTCGGCCCTTTATCTTTGCGCCAGCAGCATAGCGGGGGACAATGAGCAGTTCTTCGGGCCA	CASSIAGDNEQFF	11	0.000126421	TCRBV05-01*01	TCRBD02-01*01	TCRBJ02-01*01
AGGATCCAGCAGGTAGTGCGAGGAGATTCGGCAGCTTATTTCTGTGCCAGCTCATTGGACTTGAACACTGAAGCTTTCTTTGGACAA	CASSLDLNTEAFF	11	0.000126421	TCRBV18-01*01	TCRBD02-01	TCRBJ01-01*01
AGGATCCAGCAGGTAGTGCGAGGAGATTCGGCAGCTTATTTCTGTGCCAGCTCACCGCGGGGAGACAATGAGCAGTTCTTCGGGCCA	CASSPRGDNEQFF	11	0.000126421	TCRBV18-01*01	TCRBD02-01*01	TCRBJ02-01*01
CGCACAGAGCAGGGGGACTCGGCCATGTATCTCTGTGCCAGCAGCCCGGGACAGGGGGTTTTAGTTGATGGCTACACCTTCGGTTCG	CASSPGQGVLVDGYTF	11	0.000126421	TCRBV07-09	TCRBD01-01*01	TCRBJ01-02*01
ATCCAGCGCACAGAGCAGGGGGACTCGGCCATGTATCTCTGTGCCAGCAGCTTAGCGGCCAGCCAGACTGAAGCTTTCTTTGGACAA	CASSLAASQTEAFF	11	0.000126421	TCRBV07-09		TCRBJ01-01*01
CAGCGCACAGAGCAGCGGGACTCAGCCATGTATCGCTGTGCCAGCAGCTTACCCGGACAGATTAATCAGCCCCAGCATTTTGGTGAT	CASSLPGQINQPQHF	11	0.000126421	TCRBV07-07*01	TCRBD01-01*01	TCRBJ01-05*01
CTGGAGTCCGCTACCAGCTCCCAGACATCTGTGTACTTCTGTGCCATCAGTGAGTCAGAGGGATCACGCGAGCAGTACTTCGGGCCG	CAISESEGSREQYF	11	0.000126421	TCRBV10-03*01	TCRBD02-01*02	TCRBJ02-07*01
GAGTCCGCTACCAGCTCCCAGACATCTGTGTACTTCTGTGCCATCAGTGAGGCACAGGGTAAAAGCGCTGAAGCTTTCTTTGGACAA	CAISEAQGKSAEAFF	11	0.000126421	TCRBV10-03*01	TCRBD01-01*01	TCRBJ01-01*01
ACATTCTCAACTCTGACTGTGAGCAACATGAGCCCTGAAGACAGCAGCATATATCTCTGCAGCGTTCTCGGAGCTTTCTTTGGACAA	CSVLGAFF	11	0.000126421	TCRBV29-01*01	TCRBD02-01	TCRBJ01-01*01
AGCAACATGAGCCCTGAAGACAGCAGCATATATCTCTGCAGCGTTGAAGACTGGACCCTAACGGGCACTGAAGCTTTCTTTGGACAA	CSVEDWTLTGTEAFF	11	0.000126421	TCRBV29-01*01		TCRBJ01-01*01
ACCCTGGAGTCTGCCAGGCCCTCACATACCTCTCAGTACCTCTGTGCCAGCGGGGACAGGGGGCCGGGTACGCAGTATTTTGGCCCA	CASGDRGPGTQYF	11	0.000126421	TCRBV25-01*01	TCRBD01-01*01	TCRBJ02-03*01
ATGAGCTCCTTGGAGCTGGGGGACTCAGCCCTGTACTTCTGTGCCAGCAGCTTAGGTGGGACTTGGGGCGAGCAGTACTTCGGGCCG	CASSLGGTWGEQYF	11	0.000126421	TCRBV13-01*01	TCRBD02-01	TCRBJ02-07*01
CTTCACATCAATTCCCTGGAGCTTGGTGACTCTGCTGTGTATTTCTGTGCCAGCAGCCGAAGGGGGCACGAGCAGTACTTCGGGCCG	CASSRRGHEQYF	11	0.000126421	TCRBV03	TCRBD01-01*01	TCRBJ02-07*01
AATTCCCTGGAGCTTGGTGACTCTGCTGTGTATTTCTGTGCCAGCAGCCAAGTAGGACAGGGGAACACTGAAGCTTTCTTTGGACAA	CASSQVGQGNTEAFF	11	0.000126421	TCRBV03	TCRBD01-01*01	TCRBJ01-01*01
ACAGTGACCAGTGCCCATCCTGAAGACAGCAGCTTCTACATCTGCAGTGCCCGGAGACAGGTGAACACTGAAGCTTTCTTTGGACAA	CSARRQVNTEAFF	11	0.000126421	TCRBV20	TCRBD01-01*01	TCRBJ01-01*01
TCCCTGGAGCTTGGTGACTCTGCTGTGTATTTCTGTGCCAGCAGCCAAGACAGACTAGCGGGGGGGGAGACCCAGTACTTCGGGCCA	CASSQDRLAGGETQYF	11	0.000126421	TCRBV03	TCRBD02-01*01	TCRBJ02-05*01
GCCCATCCTGAAGACAGCAGCTTCTACATCTGCAGTGCCGGAAGACCGGGGGTGGCGATGGGCAATCAGCCCCAGCATTTTGGTGAT	CSAGRPGVAMGNQPQHF	11	0.000126421	TCRBV20	TCRBD02-01*01	TCRBJ01-05*01
ATCCAGCCCTCAGAACCCAGGGACTCAGCTGTGTACTTCTGTGCCAGCAGTGGCTCGGACACCGACTACGAGCAGTACTTCGGGCCG	CASSGSDTDYEQYF	11	0.000126421	TCRBV12	TCRBD01-01*01	TCRBJ02-07*01
AGTGCCCATCCTGAAGACAGCAGCTTCTACATCTGCAGTGCTAGAGATGAAGGACAGGGTGTTACCGGGGAGCTGTTTTTTGGAGAA	CSARDEGQGVTGELFF	11	0.000126421	TCRBV20	TCRBD01-01*01	TCRBJ02-02*01
CCCTCAGAACCCAGGGACTCAGCTGTGTACTTCTGTGCCAGCAGTTTTTTTCCAGGGGGGAACACCGGGGAGCTGTTTTTTGGAGAA	CASSFFPGGNTGELFF	11	0.000126421	TCRBV12	TCRBD01-01*01	TCRBJ02-02*01
AAGATCCAGCCCTCAGAACCCAGGGACTCAGCTGTGTACTTCTGTGCCAGCAGTTTCTTGGGAGCCGGGGAGCTGTTTTTTGGAGAA	CASSFLGAGELFF	11	0.000126421	TCRBV12	TCRBD02-01*02	TCRBJ02-02*01
ACCCTGCAGCCAGAAGACTCGGCCCTGTATCTCTGTGCCAGCAGCCAAGATGAAGACAGAATCACAGATACGCAGTATTTTGGCCCA	CASSQDEDRITDTQYF	10	0.000114928	TCRBV04-02*01	TCRBD01-01*01	TCRBJ02-03*01
CTGCAGCCAGAAGACTCGGCCCTGTATCTCTGCGCCAGCAGCCAAGGTGGTAGTGGGACAGATAATGAAAAACTGTTTTTTGGCAGT	CASSQGGSGTDNEKLFF	10	0.000114928	TCRBV04-03*01	TCRBD01-01*01	TCRBJ01-04*01
CACACCCTGCAGCCAGAAGACTCGGCCCTGTATCTCTGCGCCAGCAGCCAAGATTCCGGGACAGCTTACGAGCAGTACTTCGGGCCG	CASSQDSGTAYEQYF	10	0.000114928	TCRBV04-03*01	TCRBD01-01*01	TCRBJ02-07*01
AACGCCTTGTTGCTGGGGGACTCGGCCCTGTATCTCTGTGCCAGCAGACCCCGGACAAACTCTGGAAACACCATATATTTTGGAGAG	CASRPRTNSGNTIYF	10	0.000114928	TCRBV05-05*01	TCRBD01-01*01	TCRBJ01-03*01
GTGAACGCCTTGTTGCTGGGGGACTCGGCCCTCTATCTCTGTGCCAGCAGCTGGGACAGGGGTTCCTATGGCTACACCTTCGGTTCG	CASSWDRGSYGYTF	10	0.000114928	TCRBV05-06*01	TCRBD01-01*01	TCRBJ01-02*01
CACGCCCTGCAGCCAGAAGACTCAGCCCTGTATCTCTGCGCCAGCAGCCAAGAAGCCCAGGTGAACACTGAAGCTTTCTTTGGACAA	CASSQEAQVNTEAFF	10	0.000114928	TCRBV04-01*01	TCRBD01-01*01	TCRBJ01-01*01
AACCTTCACCTACACGCCCTGCAGCCAGAAGACTCAGCCCTGTATCTCTGCGCCAGCAGCCAAGGGCAGGGGCAGTACTTCGGGCCG	CASSQGQGQYF	10	0.000114928	TCRBV04-01*01	TCRBD01-01*01	TCRBJ02-07*01
CTGGAGCTGGGGGACTCAGCTTTGTATTTCTGTGCCAGCAGCGTGGCCAGAGGGACTAGCGGGGCAGATACGCAGTATTTTGGCCCA	CASSVARGTSGADTQYF	10	0.000114928	TCRBV09-01	TCRBD02-01*01	TCRBJ02-03*01
TCTCTGGAGCTGGGGGACTCAGCTTTGTATTTCTGTGCCAGCAGCCCCTCGACCGGGACAGGCTCCTACGAGCAGTACTTCGGGCCG	CASSPSTGTGSYEQYF	10	0.000114928	TCRBV09-01	TCRBD01-01*01	TCRBJ02-07*01
GAGTCGGCTGCTCCCTCCCAGACATCTGTGTACTTCTGTGCCAGCATCATCTCGGCCACCTCCTACAATGAGCAGTTCTTCGGGCCA	CASIISATSYNEQFF	10	0.000114928	TCRBV06-01*01		TCRBJ02-01*01
CAGCGCACAGAGCGGGGGGACTCAGCCGTGTATCTCTGTGCCAGCAGCTTAGGACTTTCGGGTCCAGATACGCAGTATTTTGGCCCA	CASSLGLSGPDTQYF	10	0.000114928	TCRBV07-03*01	TCRBD02-01	TCRBJ02-03*01
CAGCGCACAGAGCGGGGGGACTCAGCCGTGTATCTCTGTGCCAGCAGCTTCGGGACACAGAACACCGGGGAGCTGTTTTTTGGAGAA	CASSFGTQNTGELFF	10	0.000114928	TCRBV07-03*01	TCRBD01-01*01	TCRBJ02-02*01
GAGTCTGCTGCCTCCTCCCAGACATCTGTATATTTCTGCGCCAGCAGTGAGTCGGTAGACATTGGCACTGAAGCTTTCTTTGGACAA	CASSESVDIGTEAFF	10	0.000114928	TCRBV10-01	TCRBD01-01*01	TCRBJ01-01*01
CGGTCCACAAAGCTGGAGGACTCAGCCATGTACTTCTGTGCCAGCATGCCCGGGTCGTCTTATCGCGGGGAGCTGTTTTTTGGAGAA	CASMPGSSYRGELFF	10	0.000114928	TCRBV02-01*01	TCRBD02-01	TCRBJ02-02*01
TCCACAAAGCTGGAGGACTCAGCCATGTACTTCTGTGCCAGCAGTGAAGGGAGACCGGTCTCTGGAAACACCATATATTTTGGAGAG	CASSEGRPVSGNTIYF	10	0.000114928	TCRBV02-01*01	TCRBD02-01*02	TCRBJ01-03*01
CTGTCGGCTGCTCCCTCCCAGACATCTGTGTACTTCTGTGCCAGCAGTTACAATCGGGGCGGTAATGAAAAACTGTTTTTTGGCAGT	CASSYNRGGNEKLFF	10	0.000114928	TCRBV06-05*01		TCRBJ01-04*01
AAGATCCGGTCCACAAAGCTGGAGGACTCAGCCATGTACTTCTGTGCCAGCAGTGAATCCCACACCGGGGAGCTGTTTTTTGGAGAA	CASSESHTGELFF	10	0.000114928	TCRBV02-01*01		TCRBJ02-02*01
GCGTCTGCTGTACCCTCTCAGACATCTGTGTACTTCTGTGCCAGCAGTGGACTAGCGGGGGGGCTCAATGAGCAGTTCTTCGGGCCA	CASSGLAGGLNEQFF	10	0.000114928	TCRBV06-04	TCRBD02-01*01	TCRBJ02-01*01
GCGTCTGCTGTACCCTCTCAGACATCTGTGTACTTCTGTGCCAGCAGTGACTCGAGGAGTCATAATTCACCCCTCCACTTTGGGAAC	CASSDSRSHNSPLHF	10	0.000114928	TCRBV06-04	TCRBD02-01*02	TCRBJ01-06*01
CGCACACAGCAGGAGGACTCCGCCGTGTATCTCTGTGCCAGCAGCTTGGCAGGGTATGTTAGCAATCAGCCCCAGCATTTTGGTGAT	CASSLAGYVSNQPQHF	10	0.000114928	TCRBV07-08*01	TCRBD01-01*01	TCRBJ01-05*01
GTAGTGCGAGGAGATTCGGCAGCTTATTTCTGTGCCAGCTCACCAAATACGGGACTGAACTCTGGAAACACCATATATTTTGGAGAG	CASSPNTGLNSGNTIYF	10	0.000114928	TCRBV18-01*01	TCRBD02-01	TCRBJ01-03*01
GTAGTGCGAGGAGATTCGGCAGCTTATTTCTGTGCCAGCTCACCGTGGGCCACCGGGACAGCGAAAAACACCATATATTTTGGAGAG	CASSPWATGTAKNTIYF	10	0.000114928	TCRBV18-01*01	TCRBD01-01*01	TCRBJ01-03*01
ATCCAGCAGGTAGTGCGAGGAGATTCGGCAGCTTATTTCTGTGCCAGCTCACCACCGGCCAGGGTCCACGAGCAGTACTTCGGGCCG	CASSPPARVHEQYF	10	0.000114928	TCRBV18-01*01	TCRBD01-01*01	TCRBJ02-07*01
ATCCAGCAGGTAGTGCGAGGAGATTCGGCAGCTTATTTCTGTGCCAGCTCACGACGTGGGGGGCTTACTGAAGCTTTCTTTGGACAA	CASSRRGGLTEAFF	10	0.000114928	TCRBV18-01*01		TCRBJ01-01*01
GTAGTGCGAGGAGATTCGGCAGCTTATTTCTGTGCCAGCTCACCCCCCGGCAGCGGGGGGTCCACAGATACGCAGTATTTTGGCCCA	CASSPPGSGGSTDTQYF	10	0.000114928	TCRBV18-01*01	TCRBD02-01*01	TCRBJ02-03*01
ATCCAGCGCACAGAGCAGGGGGACTCGGCCATGTATCTCTGTGCCAGCAGCCTACACGCAACTAATGAAAAACTGTTTTTTGGCAGT	CASSLHATNEKLFF	10	0.000114928	TCRBV07-09		TCRBJ01-04*01
AGCACCTTGGAGCTGGGGGACTCGGCCCTTTATCTTTGCGCCAGCAGCCCGGGACAGACCTTTGGCAATGAGCAGTTCTTCGGGCCA	CASSPGQTFGNEQFF	10	0.000114928	TCRBV05-01*01	TCRBD01-01*01	TCRBJ02-01*01
GTGAGCACCTTGGAGCTGGGGGACTCGGCCCTTTATCTTTGCGCCAGCAGCTTGCAGGGTATGAACTATGGCTACACCTTCGGTTCG	CASSLQGMNYGYTF	10	0.000114928	TCRBV05-01*01	TCRBD01-01*01	TCRBJ01-02*01
ATTCTGGAGTCCGCCAGCACCAACCAGACATCTATGTACCTCTGTGCCAGCAGCCAGACAGGGATCTTTGGCTACACCTTCGGTTCG	CASSQTGIFGYTF	10	0.000114928	TCRBV28-01*01	TCRBD01-01*01	TCRBJ01-02*01
GAGTCCGCTACCAGCTCCCAGACATCTGTGTACTTCTGTGCCATCAGTGAAAGGCAGGGGGCTGGGGAGACCCAGTACTTCGGGCCA	CAISERQGAGETQYF	10	0.000114928	TCRBV10-03*01	TCRBD01-01*01	TCRBJ02-05*01
CTGGAGTCCGCTACCAGCTCCCAGACATCTGTGTACTTCTGTGCCATCAGTTCTTCCCCGGTGAACACTGAAGCTTTCTTTGGACAA	CAISSSPVNTEAFF	10	0.000114928	TCRBV10-03*01	TCRBD02-01	TCRBJ01-01*01
CTGATCCTGGAGTCGCCCAGCCCCAACCAGACCTCTCTGTACTTCTGTGCCAGCAGTTCCCTTAATGAAAAACTGTTTTTTGGCAGT	CASSSLNEKLFF	10	0.000114928	TCRBV27-01*01	TCRBD02-01	TCRBJ01-04*01
ACTGTGAGCAACATGAGCCCTGAAGACAGCAGCATATATCTCTGCAGCGCCAGACTAGGAAGCTCCTACGAGCAGTACTTCGGGCCG	CSARLGSSYEQYF	10	0.000114928	TCRBV29-01*01	TCRBD02-01	TCRBJ02-07*01
CTCAAGATCCAGCCTGCAAAGCTTGAGGACTCGGCCGTGTATCTCTGTGCCAGCGCGGGGGACGACTCCGAGCAGTACTTCGGGCCG	CASAGDDSEQYF	10	0.000114928	TCRBV11-02*02	TCRBD02-01*01	TCRBJ02-07*01
AAGATCCAGCCTGCAAAGCTTGAGGACTCGGCCGTGTATCTCTGTGCCAGCAGCAAGGGACAGTCCTACGAGCAGTACTTCGGGCCG	CASSKGQSYEQYF	10	0.000114928	TCRBV11-02*02	TCRBD01-01*01	TCRBJ02-07*01
GTGACATCGGCCCAAAAGAACCCGACAGCTTTCTATCTCTGTGCCAGTAGTATCGGGCCGGATGGAAACACCATATATTTTGGAGAG	CASSIGPDGNTIYF	10	0.000114928	TCRBV19-01		TCRBJ01-03*01
CTGACCCTGGAGTCTGCCAGGCCCTCACATACCTCTCAGTACCTCTGTGCCAGCAGTGATTCGACAGTTTTCCAGTACTTCGGGCCG	CASSDSTVFQYF	10	0.000114928	TCRBV25-01*01	TCRBD01-01*01	TCRBJ02-07*01
AACATGAGCTCCTTGGAGCTGGGGGACTCAGCCCTGTACTTCTGTGCCAGCAGCTCGGACAGCGGACCTGAAGCTTTCTTTGGACAA	CASSSDSGPEAFF	10	0.000114928	TCRBV13-01*01	TCRBD01-01*01	TCRBJ01-01*01
ATCAATTCCCTGGAGCTTGGTGACTCTGCTGTGTATTTCTGTGCCAGCAGCCCGGGGGAGTTCTACAATGAGCAGTTCTTCGGGCCA	CASSPGEFYNEQFF	10	0.000114928	TCRBV03	TCRBD02-01*01	TCRBJ02-01*01
ATCAATTCCCTGGAGCTTGGTGACTCTGCTGTGTATTTCTGTGCCAGCAGCCGGGGACTAGAACAAAACATTCAGTACTTCGGCGCC	CASSRGLEQNIQYF	10	0.000114928	TCRBV03	TCRBD02-01	TCRBJ02-04*01
TCCCTGGAGCTTGGTGACTCTGCTGTGTATTTCTGTGCCAGCAGCCATCGACAGGGGGCTAGACCTTATGGCTACACCTTCGGTTCG	CASSHRQGARPYGYTF	10	0.000114928	TCRBV03	TCRBD01-01*01	TCRBJ01-02*01
ATCCAGCCCTCAGAACCCAGGGACTCAGCTGTGTACTTCTGTGCCAGCACCTCGGGGACTCATCTCGGGAAACTGTTTTTTGGCAGT	CASTSGTHLGKLFF	10	0.000114928	TCRBV12	TCRBD02-01	TCRBJ01-04*01
CTGACAGTGACCAGTGCCCATCCTGAAGACAGCAGCTTCTACATCTGCAGTGCAAACAGGGGACGGGGTGAAGCTTTCTTTGGACAA	CSANRGRGEAFF	10	0.000114928	TCRBV20	TCRBD01-01*01	TCRBJ01-01*01
ACCAGTGCCCATCCTGAAGACAGCAGCTTCTACATCTGCAGTGCCCGCCCCGGGGGGGATGCTTATTCACCCCTCCACTTTGGGAAC	CSARPGGDAYSPLHF	10	0.000114928	TCRBV20	TCRBD02-01*01	TCRBJ01-06*01
CACATCAATTCCCTGGAGCTTGGTGACTCTGCTGTGTATTTCTGTGCCAGCAGCCCGCAGGCGAATCAGCCCCAGCATTTTGGTGAT	CASSPQANQPQHF	10	0.000114928	TCRBV03	TCRBD01-01*01	TCRBJ01-05*01
ACCAGTGCCCATCCTGAAGACAGCAGCTTCTACATCTGCAGTGCTAGAGATCTCCGACAAGCCGAAGAGACCCAGTACTTCGGGCCA	CSARDLRQAEETQYF	10	0.000114928	TCRBV20	TCRBD01-01*01	TCRBJ02-05*01
CTGGAGCTTGGTGACTCTGCTGTGTATTTCTGTGCCAGCAGCCAAGAGGGAGGGGTCTCTGGGGCCAACGTCCTGACTTTCGGGGCC	CASSQEGGVSGANVLTF	10	0.000114928	TCRBV03	TCRBD02-01*02	TCRBJ02-06*01
ATCAATTCCCTGGAGCTTGGTGACTCTGCTGTGTATTTCTGTGCCAGCAGCAGAGGGGACCGAGCCTACGAGCAGTACTTCGGGCCG	CASSRGDRAYEQYF	10	0.000114928	TCRBV03		TCRBJ02-07*01
GCTGCTCCCTCCCAGACATCTGTGTACTTCTGTGCCAGCAGTTACACAGTACAGGGAGGGAGCACAGATACGCAGTATTTTGGCCCA	CASSYTVQGGSTDTQYF	10	0.000114928	TCRBV06	TCRBD02-01*02	TCRBJ02-03*01
TCCCTGTCCCTAGAGTCTGCCATCCCCAACCAGACAGCTCTTTACTTCTGTGCCACCAGTGATTTTGAGACCCAGTACTTCGGGCCA	CATSDFETQYF	10	0.000114928	TCRBV24		TCRBJ02-05*01
AGTGCCCATCCTGAAGACAGCAGCTTCTACATCTGCAGTGCCGCCGGCGGGACAGGGTCGTCCTACAATGAGCAGTTCTTCGGGCCA	CSAAGGTGSSYNEQFF	10	0.000114928	TCRBV20	TCRBD01-01*01	TCRBJ02-01*01
ATCCAGCCCTCAGAACCCAGGGACTCAGCTGTGTACTTCTGTGCCAGCAGTGTCCCGGGTTCCCAAGAGACCCAGTACTTCGGGCCA	CASSVPGSQETQYF	10	0.000114928	TCRBV12	TCRBD02-01	TCRBJ02-05*01
GTGACCAGTGCCCATCCTGAAGACAGCAGCTTCTACATCTGCAGTGCTAGGGAACAGGTGGGCGGTGAAAAACTGTTTTTTGGCAGT	CSAREQVGGEKLFF	10	0.000114928	TCRBV20	TCRBD01-01*01	TCRBJ01-04*01
GCTGCTCCCTCCCAGACATCTGTGTACTTCTGTGCCAGCAGTTACTCAGGCAGGGTTGGAACCAAAAACATTCAGTACTTCGGCGCC	CASSYSGRVGTKNIQYF	10	0.000114928	TCRBV06	TCRBD01-01*01	TCRBJ02-04*01
ACAGTGACCAGTGCCCATCCTGAAGACAGCAGCTTCTACATCTGCAGTGCTTGGGACGGTAACAACTATGGCTACACCTTCGGTTCG	CSAWDGNNYGYTF	10	0.000114928	TCRBV20		TCRBJ01-02*01
ACCCTGCAGCCAGAAGACTCGGCCCTGTATCTCTGTGCCAGCAGCCAATCAGACAGGTTGATGGGCGGGGAGCTGTTTTTTGGAGAA	CASSQSDRLMGGELFF	9	0.000103435	TCRBV04-02*01	TCRBD01-01*01	TCRBJ02-02*01
ACGATCCAGCGCACAGAGCAGCGGGACTCGGCCATGTATCGCTGTGCCAGCAGCGCCGGACAGGGTGGAGGAGCTTTCTTTGGACAA	CASSAGQGGGAFF	9	0.000103435	TCRBV07-06*01	TCRBD01-01*01	TCRBJ01-01*01
GCCTTGTTGCTGGGGGACTCGGCCCTGTATCTCTGTGCCAGCAGCTCAGGACTAGCGGGGCCTACAGATACGCAGTATTTTGGCCCA	CASSSGLAGPTDTQYF	9	0.000103435	TCRBV05-05*01	TCRBD02-01*01	TCRBJ02-03*01
CACACCCTGCAGCCAGAAGACTCGGCCCTGTATCTCTGCGCCAGCAGCCAAGAAGACGACCGACTCGGTGAAGCTTTCTTTGGACAA	CASSQEDDRLGEAFF	9	0.000103435	TCRBV04-03*01	TCRBD02-01	TCRBJ01-01*01
TCTCTGGAGCTGGGGGACTCAGCTTTGTATTTCTGTGCCAGCAGCAGACAACAGGGTTTAGTAAACACTGAAGCTTTCTTTGGACAA	CASSRQQGLVNTEAFF	9	0.000103435	TCRBV09-01	TCRBD01-01*01	TCRBJ01-01*01
AGCTCTCTGGAGCTGGGGGACTCAGCTTTGTATTTCTGTGCCAGCAGCGAGGGACAGGGACGTTCCTACGAGCAGTACTTCGGGCCG	CASSEGQGRSYEQYF	9	0.000103435	TCRBV09-01	TCRBD01-01*01	TCRBJ02-07*01
GCCTTGGAGCTGGACGACTCGGCCCTGTATCTCTGTGCCAGCAGCGCACCCGGGACAGGGGATTCAGAGACCCAGTACTTCGGGCCA	CASSAPGTGDSETQYF	9	0.000103435	TCRBV05-04*01	TCRBD01-01*01	TCRBJ02-05*01
AACGCCTTGGAGCTGGACGACTCGGCCCTGTATCTCTGTGCCAGCAGCTCCAAAATAACAAACACCGGGGAGCTGTTTTTTGGAGAA	CASSSKITNTGELFF	9	0.000103435	TCRBV05-04*01	TCRBD01-01*01	TCRBJ02-02*01
AGGCTGGAGTCGGCTGCTCCCTCCCAGACATCTGTGTACTTCTGTGCCAGCAAGGACTACCTCCTCTACGAGCAGTACTTCGGGCCG	CASKDYLLYEQYF	9	0.000103435	TCRBV06-01*01	TCRBD02-01	TCRBJ02-07*01
GAGTCGGCTGCTCCCTCCCAGACATCTGTGTACTTCTGTGCCAGCATCCAAAGGGGGGGCGCAGGCTATGGCTACACCTTCGGTTCG	CASIQRGGAGYGYTF	9	0.000103435	TCRBV06-01*01	TCRBD02-01*01	TCRBJ01-02*01
ATCCAGCGCACAGAGCGGGGGGACTCAGCCGTGTATCTCTGTGCCAGCAGCCCTAACGCGAACACTGGGGAGCTGTTTTTTGGAGAA	CASSPNANTGELFF	9	0.000103435	TCRBV07-03*01		TCRBJ02-02*01
GAGTTGGCTGCTCCCTCCCAGACATCTGTGTACTTCTGTGCCAGCAGTTACGACGGGACAGGGAACTATGGCTACACCTTCGGTTCG	CASSYDGTGNYGYTF	9	0.000103435	TCRBV06-06	TCRBD01-01*01	TCRBJ01-02*01
AAGCTGGAGGACTCAGCCATGTACTTCTGTGCCAGCAGTGAGAGCGGCAGGGCCCCGGGCGCTGGAAACACCATATATTTTGGAGAG	CASSESGRAPGAGNTIYF	9	0.000103435	TCRBV02-01*01		TCRBJ01-03*01
CGGTCCACAAAGCTGGAGGACTCAGCCATGTACTTCTGTGCCAGTAACACAGGTCCCGGGCTTGGTTACGAGCAGTACTTCGGGCCG	CASNTGPGLGYEQYF	9	0.000103435	TCRBV02-01*01	TCRBD01-01*01	TCRBJ02-07*01
ATCCGGTCCACAAAGCTGGAGGACTCAGCCATGTACTTCTGTGCCAGCGGTGCAGGGGCGCAGGTTGAAAAACTGTTTTTTGGCAGT	CASGAGAQVEKLFF	9	0.000103435	TCRBV02-01*01	TCRBD01-01*01	TCRBJ01-04*01
ATCCGGTCCACAAAGCTGGAGGACTCAGCCATGTACTTCTGTGCCAGCAGTGAATACATGGGGGGAAACACCATATATTTTGGAGAG	CASSEYMGGNTIYF	9	0.000103435	TCRBV02-01*01		TCRBJ01-03*01
GCAGAACTGGAGGATTCTGGAGTTTATTTCTGTGCCAGCAGCCAAACTAGAGGGCAGGCTTCCGTTTCACCCCTCCACTTTGGGAAC	CASSQTRGQASVSPLHF	9	0.000103435	TCRBV14-01*01	TCRBD02-01	TCRBJ01-06*01
CAGCAGGTAGTGCGAGGAGATTCGGCAGCTTATTTCTGTGCCAGCTCACTGACAGGGATGCCCTACAATGAGCAGTTCTTCGGGCCA	CASSLTGMPYNEQFF	9	0.000103435	TCRBV18-01*01	TCRBD01-01*01	TCRBJ02-01*01
ATCCAGCAGGTAGTGCGAGGAGATTCGGCAGCTTATTTCTGTGCCAGCTCACCACAGGGACGGGAAAATGAGCAGTTCTTCGGGCCA	CASSPQGRENEQFF	9	0.000103435	TCRBV18-01*01		TCRBJ02-01*01
CGGTCCACAAAGCTGGAGGACTCAGCCATGTACTTCTGTGCCAGCAGTGGGACAGGGAGGGTCCATCAGCCCCAGCATTTTGGTGAT	CASSGTGRVHQPQHF	9	0.000103435	TCRBV02-01*01	TCRBD01-01*01	TCRBJ01-05*01
CGCACACAGCAGGAGGACTCCGCCGTGTATCTCTGTGCCAGCAGCTTAGCTAGTGGCCAGGGGGCTTACGAGCAGTACTTCGGGCCG	CASSLASGQGAYEQYF	9	0.000103435	TCRBV07-08*01	TCRBD01-01*01	TCRBJ02-07*01
CTGGAGTCAGCTACCCGCTCCCAGACATCTGTGTATTTCTGCGCCAGCAGTGGCAGGGGGCAGGGTCAGCCCCAGCATTTTGGTGAT	CASSGRGQGQPQHF	9	0.000103435	TCRBV10-02*01	TCRBD01-01*01	TCRBJ01-05*01
CAGCAGGTAGTGCGAGGAGATTCGGCAGCTTATTTCTGTGCCAGCTCACCACGGCGGACAGGGGATGAAAAACTGTTTTTTGGCAGT	CASSPRRTGDEKLFF	9	0.000103435	TCRBV18-01*01	TCRBD01-01*01	TCRBJ01-04*01
CAGGTAGTGCGAGGAGATTCGGCAGCTTATTTCTGTGCCAGCTCACCACCGGGGGAAGATAGCAATCAGCCCCAGCATTTTGGTGAT	CASSPPGEDSNQPQHF	9	0.000103435	TCRBV18-01*01		TCRBJ01-05*01
CAGCAGGTAGTGCGAGGAGATTCGGCAGCTTATTTCTGTGCCAGCTCACCAAGGGGCGGGGGGAACTACGAGCAGTACTTCGGGCCG	CASSPRGGGNYEQYF	9	0.000103435	TCRBV18-01*01	TCRBD02-01*01	TCRBJ02-07*01
AGGATCCAGCAGGTAGTGCGAGGAGATTCGGCAGCTTATTTCTGTGCCAGCACACGGGACGGGATCACTGAAGCTTTCTTTGGACAA	CASTRDGITEAFF	9	0.000103435	TCRBV18-01*01		TCRBJ01-01*01
TCGGCTGCTCCCTCCCAGACATCTGTGTACTTCTGTGCCAGCAGTTACGTCCGGACAGGGGGAGGCTATGGCTACACCTTCGGTTCG	CASSYVRTGGGYGYTF	9	0.000103435	TCRBV06-05*01	TCRBD01-01*01	TCRBJ01-02*01
AGGCTGCTGTCGGCTGCTCCCTCCCAGACATCTGTGTACTTCTGTGCCAGCAGTTACCCCGGGGACTATGGCTACACCTTCGGTTCG	CASSYPGDYGYTF	9	0.000103435	TCRBV06-05*01	TCRBD02-01*01	TCRBJ01-02*01
TCGGCTGCTCCCTCCCAGACATCTGTGTACTTCTGTGCCAGCAGTTACTCCAGGACAGGGGGCTCGTATGGCTACACCTTCGGTTCG	CASSYSRTGGSYGYTF	9	0.000103435	TCRBV06-05*01	TCRBD01-01*01	TCRBJ01-02*01
ACTCTGACAGTGACCAGTGCCCATCCTGAAGACAGCAGCTTCTACATCTGCAGTGCTAGACCCACAGGGGAAGCTTTCTTTGGACAA	CSARPTGEAFF	9	0.000103435	TCRBV20-01*01	TCRBD01-01*01	TCRBJ01-01*01
CAGCGCACAGAGCAGGGGGACTCGGCCATGTATCTCTGTGCCAGCAGCTTAGAGAGGCTACTCTACAATGAGCAGTTCTTCGGGCCA	CASSLERLLYNEQFF	9	0.000103435	TCRBV07-09	TCRBD02-01*02	TCRBJ02-01*01
AATGTGAGCACCTTGGAGCTGGGGGACTCGGCCCTTTATCTTTGCGCCAGCAGCTACGCGGGGTCCTACGAGCAGTACTTCGGGCCG	CASSYAGSYEQYF	9	0.000103435	TCRBV05-01*01	TCRBD02-01*01	TCRBJ02-07*01
GTGAGCACCTTGGAGCTGGGGGACTCGGCCCTTTATCTTTGCGCCAGCTCCCTAGCGGGGGGGCCAAACGAGCAGTACTTCGGGCCG	CASSLAGGPNEQYF	9	0.000103435	TCRBV05-01*01	TCRBD02-01*01	TCRBJ02-07*01
ACCAACCAGACATCTATGTACCTCTGTGCCAGCAGTACAACCGAGGGGGCGCGGTTACCGTACCAAGAGACCCAGTACTTCGGGCCA	CASSTTEGARLPYQETQYF	9	0.000103435	TCRBV28-01*01	TCRBD01-01*01	TCRBJ02-05*01
GAGTCCGCCAGCACCAACCAGACATCTATGTACCTCTGTGCCAGCAGTGGCTGGGTGAACTCTGGAAACACCATATATTTTGGAGAG	CASSGWVNSGNTIYF	9	0.000103435	TCRBV28-01*01		TCRBJ01-03*01
CTGATCCTGGAGTCGCCCAGCCCCAACCAGACCTCTCTGTACTTCTGTGCCAGCAGTGCTTTCACAGATACGCAGTATTTTGGCCCA	CASSAFTDTQYF	9	0.000103435	TCRBV27-01*01		TCRBJ02-03*01
CTGGAGTCGCCCAGCCCCAACCAGACCTCTCTGTACTTCTGTGCCAGCAGTCGTCTAGCGGGGGATGATTCTCAGTATTTTGGCCCA	CASSRLAGDDSQYF	9	0.000103435	TCRBV27-01*01	TCRBD02-01*01	TCRBJ02-03*01
ACGGAGTCAGGGGACACAGCACTGTATTTCTGTGCCAGCAGCGCTGCACCTCTGGGGGGCGTGAATCAGCCCCAGCATTTTGGTGAT	CASSAAPLGGVNQPQHF	9	0.000103435	TCRBV21-01*01		TCRBJ01-05*01
GAGATCCAGTCCACGGAGTCAGGGGACACAGCACTGTATTTCTGTGCCGCATCCCGGGACATAAGAAACACCATATATTTTGGAGAG	CAASRDIRNTIYF	9	0.000103435	TCRBV21-01*01	TCRBD01-01*01	TCRBJ01-03*01
ACCTTGGAGATCCAGTCCACGGAGTCAGGGGACACAGCACTGTATTTCTGTGCCAGCAGCAACAACTACGAGCAGTACTTCGGGCCG	CASSNNYEQYF	9	0.000103435	TCRBV21-01*01	TCRBD01-01*01	TCRBJ02-07*01
ACCTTGGAGATCCAGTCCACGGAGTCAGGGGACACAGCACTGTATTTCTGTGCCAGCAGCAACGGGGGATGCTACACCTTCGGTTCG	CASSNGGCYTF	9	0.000103435	TCRBV21-01*01	TCRBD02-01*01	TCRBJ01-02*01
ATCCAGCGCACACAGCAGGAGGACTCGGCCGTGTATCTCTGTGCCAGCTCAAAGGACAGGGGAGAAGAGACCCAGTACTTCGGGCCA	CASSKDRGEETQYF	9	0.000103435	TCRBV07-02*01	TCRBD01-01*01	TCRBJ02-05*01
GTGAGCAACATGAGCCCTGAAGACAGCAGCATATATCTCTGCAGCGTGGATAAGTCCGATTGGGGCTATGGCTACACCTTCGGTTCG	CSVDKSDWGYGYTF	9	0.000103435	TCRBV29-01*01		TCRBJ01-02*01
ATCCAGCGCACACAGCAGGAGGACTCGGCCGTGTATCTCTGTGCCAGCAGTCCTCTTCGGACAGGGACAGGCTACACCTTCGGTTCG	CASSPLRTGTGYTF	9	0.000103435	TCRBV07-02*01	TCRBD01-01*01	TCRBJ01-02*01
CAGCAGGAGGACTCGGCCGTGTATCTCTGTGCCAGCAGCGGCAGTGGCGGGTGGGCTAGCGGTCGTAATGAGCAGTTCTTCGGGCCA	CASSGSGGWASGRNEQFF	9	0.000103435	TCRBV07-02*01	TCRBD02-01	TCRBJ02-01*01
CAGCGCACACAGCAGGAGGACTCGGCCGTGTATCTCTGTGCCAGCACCTCTCTTGGGACTAGCGTTAGTGAGCAGTACTTCGGGCCG	CASTSLGTSVSEQYF	9	0.000103435	TCRBV07-02*01	TCRBD02-01	TCRBJ02-07*01
CGCACACAGCAGGAGGACTCGGCCGTGTATCTCTGTGCCAGCAGCTTAACGTCAGGAGGCTCTGGAAACACCATATATTTTGGAGAG	CASSLTSGGSGNTIYF	9	0.000103435	TCRBV07-02*01	TCRBD02-01*02	TCRBJ01-03*01
ATCCAGCGCACACAGCAGGAGGACTCGGCCGTGTATCTCTGTGCCAGCAGCCCAGACTACTCCACAGATACGCAGTATTTTGGCCCA	CASSPDYSTDTQYF	9	0.000103435	TCRBV07-02*01	TCRBD02-01	TCRBJ02-03*01
ACGATCCAGCGCACACAGCAGGAGGACTCGGCCGTGTATCTCTGTGCCAGCAGCTTAGGGACAGGGAATGAAGCTTTCTTTGGACAA	CASSLGTGNEAFF	9	0.000103435	TCRBV07-02*01	TCRBD01-01*01	TCRBJ01-01*01
AAGATCCAGCCTGCAAAGCTTGAGGACTCGGCCGTGTATCTCTGTGCCAGCAGCTTAGGGTTTGCTGCTGAAGCTTTCTTTGGACAA	CASSLGFAAEAFF	9	0.000103435	TCRBV11-02*02		TCRBJ01-01*01
ATCCAGCCTGCAAAGCTTGAGGACTCGGCCGTGTATCTCTGTGCCAGCAGCGTCGGGACCACAGGGGAGACCCAGTACTTCGGGCCA	CASSVGTTGETQYF	9	0.000103435	TCRBV11-02*02	TCRBD01-01*01	TCRBJ02-05*01
CTCAAGATCCAGCCTGCAGAGCTTGGGGACTCGGCCGTGTATCTCTGTGCCAGCAGCTCAGTCACCGGGGAGCTGTTTTTTGGAGAA	CASSSVTGELFF	9	0.000103435	TCRBV11-03*01	TCRBD01-01*01	TCRBJ02-02*01
ACTGTGACATCGGCCCAAAAGAACCCGACAGCTTTCTATCTCTGTGCCAGTAGTGCCAGCTATGGAAACACCATATATTTTGGAGAG	CASSASYGNTIYF	9	0.000103435	TCRBV19-01		TCRBJ01-03*01
GTGACATCGGCCCAAAAGAACCCGACAGCTTTCTATCTCTGTGCCAGTACCCTCGCGGGATATAATTCACCCCTCCACTTTGGGAAC	CASTLAGYNSPLHF	9	0.000103435	TCRBV19-01	TCRBD02-01*02	TCRBJ01-06*01
GTGACATCGGCCCAAAAGAACCCGACAGCTTTCTATCTCTGTGCCAGTACCTCGACAGGGGAGGCTTCACCCCTCCACTTTGGGAAC	CASTSTGEASPLHF	9	0.000103435	TCRBV19-01	TCRBD01-01*01	TCRBJ01-06*01
ACTGTGACATCGGCCCAAAAGAACCCGACAGCTTTCTATCTCTGTGCCAGTAGTCCCAGGGAGGATTCACCCCTCCACTTTGGGAAC	CASSPREDSPLHF	9	0.000103435	TCRBV19-01	TCRBD02-01*02	TCRBJ01-06*01
ACCCTGGAGTCTGCCAGGCCCTCACATACCTCTCAGTACCTCTGTGCCAGCAGGGGGGAGTATAATTCACCCCTCCACTTTGGGAAC	CASRGEYNSPLHF	9	0.000103435	TCRBV25-01*01		TCRBJ01-06*01
AACATGAGCTCCTTGGAGCTGGGGGACTCAGCCCTGTACTTCTGTGCCAGCAGCTCGGAAGAGGGCTCTGAAGCTTTCTTTGGACAA	CASSSEEGSEAFF	9	0.000103435	TCRBV13-01*01	TCRBD02-01*02	TCRBJ01-01*01
ACCAGTGCCCATCCTGAAGACAGCAGCTTCTACATCTGCAGTGCTAGAGATAGGAAGGGGTGGGGAACTGAAGCTTTCTTTGGACAA	CSARDRKGWGTEAFF	9	0.000103435	TCRBV20	TCRBD01-01*01	TCRBJ01-01*01
GAACCCAGGGACTCAGCTGTGTACTTCTGTGCCAGCAGTCCGAGGAGGGAACAAGGGAGCTCTGGAAACACCATATATTTTGGAGAG	CASSPRREQGSSGNTIYF	9	0.000103435	TCRBV12	TCRBD02-01*02	TCRBJ01-03*01
AAGATCCAGCCCTCAGAACCCAGGGACTCAGCTGTGTACTTCTGTGCCAGCGGGGGGACCGCTGGGCAGCCCCAGCATTTTGGTGAT	CASGGTAGQPQHF	9	0.000103435	TCRBV12	TCRBD02-01*01	TCRBJ01-05*01
TCCCTGGAGCTTGGTGACTCTGCTGTGTATTTCTGTGCCAGCAGCCAAGACGTCACAAATAGCAATCAGCCCCAGCATTTTGGTGAT	CASSQDVTNSNQPQHF	9	0.000103435	TCRBV03	TCRBD01-01*01	TCRBJ01-05*01
GTGACCAGTGCCCATCCTGAAGACAGCAGCTTCTACATCTGCAGTGCTGGCCCCCCGGACAGGGCGACTGAAGCTTTCTTTGGACAA	CSAGPPDRATEAFF	9	0.000103435	TCRBV20	TCRBD01-01*01	TCRBJ01-01*01
GTGACCAGTGCCCATCCTGAAGACAGCAGCTTCTACATCTGCAGTGCCAGTCGCCAGGGTCGCAATCAGCCCCAGCATTTTGGTGAT	CSASRQGRNQPQHF	9	0.000103435	TCRBV20	TCRBD01-01*01	TCRBJ01-05*01
AGTGCCCATCCTGAAGACAGCAGCTTCTACATCTGCAGTGCTAGAGATAAGGGCCAGTCCTATAATTCACCCCTCCACTTTGGGAAC	CSARDKGQSYNSPLHF	9	0.000103435	TCRBV20		TCRBJ01-06*01
CTGACAGTGACCAGTGCCCATCCTGAAGACAGCAGCTTCTACATCTGCAGTGCTGCTCGGACAGACACTGAAGCTTTCTTTGGACAA	CSAARTDTEAFF	9	0.000103435	TCRBV20	TCRBD01-01*01	TCRBJ01-01*01
AAGATCCAGCCCTCAGAACCCAGGGACTCAGCTGTGTACTTCTGTGCCAGCAGAAGGGATAGCAATCAGCCCCAGCATTTTGGTGAT	CASRRDSNQPQHF	9	0.000103435	TCRBV12		TCRBJ01-05*01
GAACCCAGGGACTCAGCTGTGTACTTCTGTGCCAGCAGCACCCCGTTTGGAACGCATGGGGGGAGGACTGAAGCTTTCTTTGGACAA	CASSTPFGTHGGRTEAFF	9	0.000103435	TCRBV12	TCRBD02-01	TCRBJ01-01*01
AGTGCCCATCCTGAAGACAGCAGCTTCTACATCTGCAGTGCTAGCAGACTAGCGGGGGCTAGGAAAGAGACCCAGTACTTCGGGCCA	CSASRLAGARKETQYF	9	0.000103435	TCRBV20	TCRBD02-01*01	TCRBJ02-05*01
GAGTCGGCTGCTCCCTCCCAAACATCTGTGTACTTCTGTGCCAGCAGTTACAGGGGCTCTGGGGCCAACGTCCTGACTTTCGGGGCC	CASSYRGSGANVLTF	9	0.000103435	TCRBV06	TCRBD01-01*01	TCRBJ02-06*01
CTACACACCCTGCAGCCAGAAGACTCGGCCCTGTATCTCTGTGCCAGCAGCCAAGGGGGGGTCACAGATACGCAGTATTTTGGCCCA	CASSQGGVTDTQYF	8	9.19424e-05	TCRBV04-02*01	TCRBD02-01*01	TCRBJ02-03*01
ACCCTGCAGCCAGAAGACTCGGCCCTGTATCTCTGTGCCAGCAGCCAAGATCTTGGGGGACAGGGCCAGCCCCAGCATTTTGGTGAT	CASSQDLGGQGQPQHF	8	9.19424e-05	TCRBV04-02*01	TCRBD01-01*01	TCRBJ01-05*01
ACAGAGCAGCGGGACTCGGCCATGTATCGCTGTGCCAGCAGCTTAGGGACAGGGGCCTTCAGCAATCAGCCCCAGCATTTTGGTGAT	CASSLGTGAFSNQPQHF	8	9.19424e-05	TCRBV07-06*01	TCRBD01-01*01	TCRBJ01-05*01
CACCTACACACCCTGCAGCCAGAAGACTCGGCCCTGTATCTCTGCGCCAGCAGCCAAAACGGGGACAGTGAGCAGTTCTTCGGGCCA	CASSQNGDSEQFF	8	9.19424e-05	TCRBV04-03*01	TCRBD01-01*01	TCRBJ02-01*01
GCCTTGTTGCTGGGGGACTCGGCCCTCTATCTCTGTGCCAGCAGCCCTGGACAGGGGGCTGCTGGAAACACCATATATTTTGGAGAG	CASSPGQGAAGNTIYF	8	9.19424e-05	TCRBV05-06*01	TCRBD01-01*01	TCRBJ01-03*01
AATGTGAACGCCTTGTTGCTGGGGGACTCGGCCCTCTATCTCTGTGCCAGCAGCTTCCGGGGGATCACTGAAGCTTTCTTTGGACAA	CASSFRGITEAFF	8	9.19424e-05	TCRBV05-06*01	TCRBD02-01*01	TCRBJ01-01*01
AATGTGAACGCCTTGTTGCTGGGGGACTCGGCCCTCTATCTCTGTGCCAGCAGCTTGGGGCCGGGCCAGCCCCAGCATTTTGGTGAT	CASSLGPGQPQHF	8	9.19424e-05	TCRBV05-06*01		TCRBJ01-05*01
CTTCACCTACACGCCCTGCAGCCAGAAGACTCAGCCCTGTATCTCTGCGCCAGCAGCCAAAGTACAGATACGCAGTATTTTGGCCCA	CASSQSTDTQYF	8	9.19424e-05	TCRBV04-01*01		TCRBJ02-03*01
GCCCTGCAGCCAGAAGACTCAGCCCTGTATCTCTGCGCCAGCAGCCAAGTTCCGGGGGGCTACACCGGGGAGCTGTTTTTTGGAGAA	CASSQVPGGYTGELFF	8	9.19424e-05	TCRBV04-01*01	TCRBD02-01*01	TCRBJ02-02*01
GCCCTGCAGCCAGAAGACTCAGCCCTGTATCTCTGCGCCAGCAGCCGGTTTCCGGGGGCCGGTTACAATGAGCAGTTCTTCGGGCCA	CASSRFPGAGYNEQFF	8	9.19424e-05	TCRBV04-01*01		TCRBJ02-01*01
GAGTTGGCTGCTCCCTCCCAGACATCTGTGTACTTCTGTGCCAGCAGTTTACTAGCGGGGGGGCTCTCCGAGCAGTACTTCGGGCCG	CASSLLAGGLSEQYF	8	9.19424e-05	TCRBV06-06	TCRBD02-01*01	TCRBJ02-07*01
CGGTCCACAAAGCTGGAGGACTCAGCCATGTACTTCTGTGCCAGCAGTGATCGGACAGGGGGGAATCAGCCCCAGCATTTTGGTGAT	CASSDRTGGNQPQHF	8	9.19424e-05	TCRBV02-01*01	TCRBD01-01*01	TCRBJ01-05*01
GTGAACGCCTTGGAGCTGGACGACTCGGCCCTGTATCTCTGTGCCAGCAGCTTAGGGGGGGCAACCAATGAGCAGTTCTTCGGGCCA	CASSLGGATNEQFF	8	9.19424e-05	TCRBV05-04*01	TCRBD02-01*01	TCRBJ02-01*01
TCGGCTGCTCCCTCCCAGACATCTGTGTACTTCTGTGCCAGCAGTGAAGCCTGGGACAGGGGAATAAACGAGCAGTACTTCGGGCCG	CASSEAWDRGINEQYF	8	9.19424e-05	TCRBV06-01*01	TCRBD01-01*01	TCRBJ02-07*01
AGGCTGGAGTCGGCTGCTCCCTCCCAGACATCTGTGTACTTCTGTGCCAGCAGTGAAGGACAGAACTATGGCTACACCTTCGGTTCG	CASSEGQNYGYTF	8	9.19424e-05	TCRBV06-01*01	TCRBD01-01*01	TCRBJ01-02*01
AGGCTGGAGTCGGCTGCTCCCTCCCAGACATCTGTGTACTTCTGTGCCAGCGTAGCGGGCTCCTACAATGAGCAGTTCTTCGGGCCA	CASVAGSYNEQFF	8	9.19424e-05	TCRBV06-01*01	TCRBD02-01	TCRBJ02-01*01
TCGGCTGCTCCCTCCCAGACATCTGTGTACTTCTGTGCCAGCAGCGAAGGGTTAACTAGCGTGACAGATACGCAGTATTTTGGCCCA	CASSEGLTSVTDTQYF	8	9.19424e-05	TCRBV06-01*01	TCRBD02-01	TCRBJ02-03*01
ATCCAGCGCACAGAGCGGGGGGACTCAGCCGTGTATCTCTGTGCCAGCAGCTTATCCCAGGGAGACAATGAGCAGTTCTTCGGGCCA	CASSLSQGDNEQFF	8	9.19424e-05	TCRBV07-03*01		TCRBJ02-01*01
CTCAGGCTGGAGTTGGCTGCTCCCTCCCAGACATCTGTGTACTTCTGTGCCAGCAGTACTGGTGGGTACGAGCAGTACTTCGGGCCG	CASSTGGYEQYF	8	9.19424e-05	TCRBV06-06		TCRBJ02-07*01
ATCCGGTCCACAAAGCTGGAGGACTCAGCCATGTACTTCTGTGCCAGCAGTGAGGGCAGGGCTGGAAACACCATATATTTTGGAGAG	CASSEGRAGNTIYF	8	9.19424e-05	TCRBV02-01*01	TCRBD01-01*01	TCRBJ01-03*01
TTCACTCTGAAGATCCGGTCCACAAAGCTGGAGGACTCAGCCATGTACTTCTGTGCCAGCAGTGGGGGTGAGCAGTTCTTCGGGCCA	CASSGGEQFF	8	9.19424e-05	TCRBV02-01*01		TCRBJ02-01*01
AAGATCCGGTCCACAAAGCTGGAGGACTCAGCCATGTACTTCTGTGCCAGCAGTGAGGTGACGGACAATGAGCAGTTCTTCGGGCCA	CASSEVTDNEQFF	8	9.19424e-05	TCRBV02-01*01		TCRBJ02-01*01
AAGATCCGGTCCACAAAGCTGGAGGACTCAGCCATGTACTTCTGTGCCAGCAGTGAAGACAGGGTTTACGAGCAGTACTTCGGGCCG	CASSEDRVYEQYF	8	9.19424e-05	TCRBV02-01*01	TCRBD01-01*01	TCRBJ02-07*01
TCCACAAAGCTGGAGGACTCAGCCATGTACTTCTGTGCCAGCAGTGATGGAACAGGTCGCTCTGGAAACACCATATATTTTGGAGAG	CASSDGTGRSGNTIYF	8	9.19424e-05	TCRBV02-01*01	TCRBD01-01*01	TCRBJ01-03*01
ACTCTGAAGATCCGGTCCACAAAGCTGGAGGACTCAGCCATGTACTTCTGTGCCAGCAGCCCATCAGACGAGCAGTACTTCGGGCCG	CASSPSDEQYF	8	9.19424e-05	TCRBV02-01*01	TCRBD01-01*01	TCRBJ02-07*01
CTGGAGGATTCTGGAGTTTATTTCTGTGCCAGCAGCCAAGGGTCTCTCACACCGTTTTCTGGGGCCAACGTCCTGACTTTCGGGGCC	CASSQGSLTPFSGANVLTF	8	9.19424e-05	TCRBV14-01*01	TCRBD01-01*01	TCRBJ02-06*01
ACCTTGGAGCTGGGGGACTCGGCCCTTTATCTTTGCGCCAGCAGGCCCGGGACAGGAAGCATGAACACTGAAGCTTTCTTTGGACAA	CASRPGTGSMNTEAFF	8	9.19424e-05	TCRBV05-01*01	TCRBD01-01*01	TCRBJ01-01*01
ATCCAGCAGGTAGTGCGAGGAGATTCGGCAGCTTATTTCTGTGCCAGCTCACGACAGGCTTCAGAAGATGGCTACACCTTCGGTTCG	CASSRQASEDGYTF	8	9.19424e-05	TCRBV18-01*01	TCRBD01-01*01	TCRBJ01-02*01
ATCCGGTCCACAAAGCTGGAGGACTCAGCCATGTACTTCTGTGCCAGCAGTGGGGGCTACTCAAAGGAAAAACTGTTTTTTGGCAGT	CASSGGYSKEKLFF	8	9.19424e-05	TCRBV02-01*01	TCRBD01-01*01	TCRBJ01-04*01
TCCACAAAGCTGGAGGACTCAGCCATGTACTTCTGTGCCAGCAGTGAACGATGGGGCAGGAGGGCAGAGACCCAGTACTTCGGGCCA	CASSERWGRRAETQYF	8	9.19424e-05	TCRBV02-01*01	TCRBD02-01*02	TCRBJ02-05*01
ACGTTGGCGTCTGCTGTACCCTCTCAGACATCTGTGTACTTCTGTGCCAGCAGTGACACTAGCACAGATACGCAGTATTTTGGCCCA	CASSDTSTDTQYF	8	9.19424e-05	TCRBV06-04	TCRBD02-01	TCRBJ02-03*01
CTGTCGGCTGCTCCCTCCCAGACATCTGTGTACTTCTGTGCCAGCAGAGTCAGGGGCTCCTATAATTCACCCCTCCACTTTGGGAAC	CASRVRGSYNSPLHF	8	9.19424e-05	TCRBV06-05*01	TCRBD01-01*01	TCRBJ01-06*01
CCGCTCAGGCTGCTGTCGGCTGCTCCCTCCCAGACATCTGTGTACTTCTGTGCCAGCAGTCCCGGGGCCGGCTACACCTTCGGTTCG	CASSPGAGYTF	8	9.19424e-05	TCRBV06-05*01		TCRBJ01-02*01
CTGCTGTCGGCTGCTCCCTCCCAGACATCTGTGTACTTCTGTGCCAGCAGTTACCGGGACCCCTCCTACGAGCAGTACTTCGGGCCG	CASSYRDPSYEQYF	8	9.19424e-05	TCRBV06-05*01		TCRBJ02-07*01
TCCACTCTGACAGTGACCAGTGCCCATCCTGAAGACAGCAGCTTCTACATCTGCAGTGCCCATGGCCAAGGCTACACCTTCGGTTCG	CSAHGQGYTF	8	9.19424e-05	TCRBV20-01*01	TCRBD01-01*01	TCRBJ01-02*01
ATCCAGCGCACAGAGCAGGGGGACTCGGCCATGTATCTCTGTGCCAGCACAAAAGCGGGAATGAACACTGAAGCTTTCTTTGGACAA	CASTKAGMNTEAFF	8	9.19424e-05	TCRBV07-09	TCRBD02-01*02	TCRBJ01-01*01
ATCCAGCGCACAGAGCAGGGGGACTCGGCCATGTATCTCTGTGCCAGCAGCTCCCGACCCAGCTCCTACGAGCAGTACTTCGGGCCG	CASSSRPSSYEQYF	8	9.19424e-05	TCRBV07-09		TCRBJ02-07*01
CGCACAGAGCAGCGGGACTCAGCCATGTATCGCTGTGCCAGCAGCTCGGGACGGGCAGAATCGCAAGAGACCCAGTACTTCGGGCCA	CASSSGRAESQETQYF	8	9.19424e-05	TCRBV07-07*01		TCRBJ02-05*01
AGCACCTTGGAGCTGGGGGACTCGGCCCTTTATCTTTGCGCCAGCAGCTTGATGGCAGGGGCGGACAATGAGCAGTTCTTCGGGCCA	CASSLMAGADNEQFF	8	9.19424e-05	TCRBV05-01*01	TCRBD01-01*01	TCRBJ02-01*01
AGCACCTTGGAGCTGGGGGACTCGGCCCTTTATCTTTGCGCCAGCAGCTTGGACGGGCCACCCAATCAGCCCCAGCATTTTGGTGAT	CASSLDGPPNQPQHF	8	9.19424e-05	TCRBV05-01*01		TCRBJ01-05*01
CTGGAGTCCGCCAGCACCAACCAGACATCTATGTACCTCTGTGCCAGCACTTTGGGGGTTGGGAACACTGAAGCTTTCTTTGGACAA	CASTLGVGNTEAFF	8	9.19424e-05	TCRBV28-01*01		TCRBJ01-01*01
GAGTCGCCCAGCCCCAACCAGACCTCTCTGTACTTCTGTGCCAGCAGTTTAGTACCGGGCTTATGGAACATTCAGTACTTCGGCGCC	CASSLVPGLWNIQYF	8	9.19424e-05	TCRBV27-01*01		TCRBJ02-04*01
TCGCCCAGCCCCAACCAGACCTCTCTGTACTTCTGTGCCAGCAGTTTAACTGGGACTATCGACTACAATGAGCAGTTCTTCGGGCCA	CASSLTGTIDYNEQFF	8	9.19424e-05	TCRBV27-01*01	TCRBD02-01	TCRBJ02-01*01
CTGATCCTGGAGTCGCCCAGCCCCAACCAGACCTCTCTGTACTTCTGTGCCAGCAGTAACCCCCCCGCTGAGCAGTTCTTCGGGCCA	CASSNPPAEQFF	8	9.19424e-05	TCRBV27-01*01		TCRBJ02-01*01
CAGCGCACACAGCAGGAGGACTCGGCCGTGTATCTCTGTGCCAGCAGCCCGAGGACAGCGACGGGCGGGGAGCTGTTTTTTGGAGAA	CASSPRTATGGELFF	8	9.19424e-05	TCRBV07-02*01	TCRBD01-01*01	TCRBJ02-02*01
ACTCTGACGATCCAGCGCACACAGCAGGAGGACTCGGCCGTGTATCTCTGTGCCAGCCGGGACGGTGAAAAACTGTTTTTTGGCAGT	CASRDGEKLFF	8	9.19424e-05	TCRBV07-02*01		TCRBJ01-04*01
AGCAACATGAGCCCTGAAGACAGCAGCATATATCTCTGCAGCGTTGAGTTGGGGAGCTCTGGGGCCAACGTCCTGACTTTCGGGGCC	CSVELGSSGANVLTF	8	9.19424e-05	TCRBV29-01*01	TCRBD02-01*02	TCRBJ02-06*01
ATGAGCCCTGAAGACAGCAGCATATATCTCTGCAGCGGATCGACTAGCGGGGGGCCCTCCGCCTACAATGAGCAGTTCTTCGGGCCA	CSGSTSGGPSAYNEQFF	8	9.19424e-05	TCRBV29-01*01	TCRBD02-01*01	TCRBJ02-01*01
ACTGTGAGCAACATGAGCCCTGAAGACAGCAGCATATATCTCTGCAGCGTCCCCGGGACAGGGAACTACGAGCAGTACTTCGGGCCG	CSVPGTGNYEQYF	8	9.19424e-05	TCRBV29-01*01	TCRBD01-01*01	TCRBJ02-07*01
CTGACTGTGAGCAACATGAGCCCTGAAGACAGCAGCATATATCTCTGCAGCGTTGATCTACAGCAGAACGAGCAGTACTTCGGGCCG	CSVDLQQNEQYF	8	9.19424e-05	TCRBV29-01*01	TCRBD01-01*01	TCRBJ02-07*01
ACGATCCAGCGCACACAGCAGGAGGACTCGGCCGTGTATCTCTGTGCCAGCAGCGAAGGACAGGCCTATGGCTACACCTTCGGTTCG	CASSEGQAYGYTF	8	9.19424e-05	TCRBV07-02*01	TCRBD01-01*01	TCRBJ01-02*01
ATCCAGCCTGCAAAGCTTGAGGACTCGGCCGTGTATCTCTGTGCCAGCAGCTCCAATTGGGCCCTTTACGAGCAGTACTTCGGGCCG	CASSSNWALYEQYF	8	9.19424e-05	TCRBV11-02*02	TCRBD01-01*01	TCRBJ02-07*01
ACATCGGCCCAAAAGAACCCGACAGCTTTCTATCTCTGTGCCAGTAGACCAGGGAAACAGGGCCTCTATGGCTACACCTTCGGTTCG	CASRPGKQGLYGYTF	8	9.19424e-05	TCRBV19-01	TCRBD01-01*01	TCRBJ01-02*01
AAGATCCAGCCTGCAAAGCTTGAGGACTCGGCCGTGTATCTCTGTGCCAGCACCCGACAGCGCCAAGAGACCCAGTACTTCGGGCCA	CASTRQRQETQYF	8	9.19424e-05	TCRBV11-02*02	TCRBD01-01*01	TCRBJ02-05*01
AAGATCCAGCCTGCAAAGCTTGAGGACTCGGCCGTGTATCTCTGTGCCAGCAGCTTAGGATTCTCTGAGACCCAGTACTTCGGGCCA	CASSLGFSETQYF	8	9.19424e-05	TCRBV11-02*02		TCRBJ02-05*01
AAGATCCAGCCTGCAAAGCTTGAGGACTCGGCCGTGTATCTCTGTGCCAGCAGCTTATGGGAGGACTATGGCTACACCTTCGGTTCG	CASSLWEDYGYTF	8	9.19424e-05	TCRBV11-02*02	TCRBD02-01*02	TCRBJ01-02*01
CTCAAGATCCAGCCTGCAAAGCTTGAGGACTCGGCCGTGTATCTCTGTGCCAGCCGCGCGGCTAACTATGGCTACACCTTCGGTTCG	CASRAANYGYTF	8	9.19424e-05	TCRBV11-02*02	TCRBD02-01	TCRBJ01-02*01
ATCCAGCCTGCAAAGCTTGAGGACTCGGCCGTGTATCTCTGTGCCAGCAGCTCCAGGGGTGCTAACTATGGCTACACCTTCGGTTCG	CASSSRGANYGYTF	8	9.19424e-05	TCRBV11-02*02	TCRBD01-01*01	TCRBJ01-02*01
ACTGTGACATCGGCCCAAAAGAACCCGACAGCTTTCTATCTCTGTGCCAGTAGGTCCGACTTGAATCAGCCCCAGCATTTTGGTGAT	CASRSDLNQPQHF	8	9.19424e-05	TCRBV19-01	TCRBD02-01	TCRBJ01-05*01
ACATCGGCCCAAAAGAACCCGACAGCTTTCTATCTCTGTGCCAGTAGTATTGCGGGGGGGCACACCGGGGAGCTGTTTTTTGGAGAA	CASSIAGGHTGELFF	8	9.19424e-05	TCRBV19-01	TCRBD02-01*01	TCRBJ02-02*01
ACATCGGCCCAAAAGAACCCGACAGCTTTCTATCTCTGTGCCAGTAGTATAGGACTGGCCTCGGGGGAGGGCTACACCTTCGGTTCG	CASSIGLASGEGYTF	8	9.19424e-05	TCRBV19-01	TCRBD02-01*01	TCRBJ01-02*01
ACTGTGACATCGGCCCAAAAGAACCCGACAGCTTTCTATCTCTGTGCCACCCAGGTTATGCGGGGTCAGCCCCAGCATTTTGGTGAT	CATQVMRGQPQHF	8	9.19424e-05	TCRBV19-01	TCRBD02-01*01	TCRBJ01-05*01
GCCCAAAAGAACCCGACAGCTTTCTATCTCTGTGCCAGCCGGGACAGCTATCGTCTTCTCAGCAATCAGCCCCAGCATTTTGGTGAT	CASRDSYRLLSNQPQHF	8	9.19424e-05	TCRBV19-01	TCRBD01-01*01	TCRBJ01-05*01
AAGATCCAGCCCTCAGAACCCAGGGACTCAGCTGTGTATTTTTGTGCTAGTGGTTTGGTTGGGGACACTGAAGCTTTCTTTGGACAA	CASGLVGDTEAFF	8	9.19424e-05	TCRBV12-05*01		TCRBJ01-01*01
TCGGCCCAAAAGAACCCGACAGCTTTCTATCTCTGTGCCAGTAGTACTGACCGTCCAGGGGCGAGTCAGCCCCAGCATTTTGGTGAT	CASSTDRPGASQPQHF	8	9.19424e-05	TCRBV19-01	TCRBD01-01*01	TCRBJ01-05*01
AAGGAATCCTTTCCTCTCACTGTGACATCGGCCCAAAAGAACCCAGGGGTTCAAGGCTCCTATAATTCACCCCTCCACTTTGGGAAC	YNSPLHF	8	9.19424e-05	TCRBV19-01	TCRBD01-01*01	TCRBJ01-06*01
GTGACATCGGCCCAAAAGAACCCGACAGCTTTCTATCTCTGTGCCAGTAGTCAGGGGGCCACTGGAAACACCATATATTTTGGAGAG	CASSQGATGNTIYF	8	9.19424e-05	TCRBV19-01	TCRBD01-01*01	TCRBJ01-03*01
GAGTCTGCCAGGCCCTCACATACCTCTCAGTACCTCTGTGCCAGCAGTGAGAAGACAGGGGGCCGCGATGGCTACACCTTCGGTTCG	CASSEKTGGRDGYTF	8	9.19424e-05	TCRBV25-01*01	TCRBD01-01*01	TCRBJ01-02*01
ACCCTGGAGTCTGCCAGGCCCTCACATACCTCTCAGTACCTCTGTGCCAGCACCCGGGGGGGCGGCAATACGCAGTATTTTGGCCCA	CASTRGGGNTQYF	8	9.19424e-05	TCRBV25-01*01	TCRBD02-01*01	TCRBJ02-03*01
AACATGAGCTCCTTGGAGCTGGGGGACTCAGCCCTGTACTTCTGTGCCAGCAGCTTTCGGGTGAACACTGAAGCTTTCTTTGGACAA	CASSFRVNTEAFF	8	9.19424e-05	TCRBV13-01*01	TCRBD02-01	TCRBJ01-01*01
ACCAGTGCCCATCCTGAAGACAGCAGCTTCTACATCTGCAGTGCTAGAGATCCGGCAGGGGAGGCCTATGGCTACACCTTCGGTTCG	CSARDPAGEAYGYTF	8	9.19424e-05	TCRBV20		TCRBJ01-02*01
CACATCAATTCCCTGGAGCTTGGTGACTCTGCTGTGTATTTCTGTGCCAGCAGCCAAGATCCCAGAACACCCCTCCACTTTGGGAAC	CASSQDPRTPLHF	8	9.19424e-05	TCRBV03	TCRBD01-01*01	TCRBJ01-06*01
CTGAAGATCCAGCCCTCAGAACCCAGGGACTCAGCTGTGTACTTCTGTGCCAGCAGGATGGGTAGTCAGCCCCAGCATTTTGGTGAT	CASRMGSQPQHF	8	9.19424e-05	TCRBV12		TCRBJ01-05*01
GTGACCAGTGCCCATCCTGAAGACAGCAGCTTCTACATCTGCAGTGCTGGCGACAGTTCATCTAACTATGGCTACACCTTCGGTTCG	CSAGDSSSNYGYTF	8	9.19424e-05	TCRBV20	TCRBD01-01*01	TCRBJ01-02*01
TCGGCTGCTCCCTCCCAGACATCTGTGTACTTCTGTGCCAGCAGTCGTAAAATGGGACGGGTTAATTCACCCCTCCACTTTGGGAAC	CASSRKMGRVNSPLHF	8	9.19424e-05	TCRBV06		TCRBJ01-06*01
ACAGTGACCAGTGCCCATCCTGAAGACAGCAGCTTCTACATCTGCAGTGCGAGCCGGGGGAACACCGGGGAGCTGTTTTTTGGAGAA	CSASRGNTGELFF	8	9.19424e-05	TCRBV20	TCRBD02-01*01	TCRBJ02-02*01
CAGCCCTCAGAACCCAGGGACTCAGCTGTGTACTTCTGTGCCAGCAGTTTAGGGGGACAGAACAATCAGCCCCAGCATTTTGGTGAT	CASSLGGQNNQPQHF	8	9.19424e-05	TCRBV12	TCRBD01-01*01	TCRBJ01-05*01
ACCAGTGCCCATCCTGAAGACAGCAGCTTCTACATCTGCAGTGCTAGAGAAGGTAGCGGGGAGGGAAAGACCCAGTACTTCGGGCCA	CSAREGSGEGKTQYF	8	9.19424e-05	TCRBV20	TCRBD02-01*01	TCRBJ02-05*01
ACAGTGACCAGTGCCCATCCTGAAGACAGCAGCTTCTACATCTGCAGTGCTAGAGATTCGACGGACTATGGCTACACCTTCGGTTCG	CSARDSTDYGYTF	8	9.19424e-05	TCRBV20		TCRBJ01-02*01
TCCCTGGAGCTTGGTGACTCTGCTGTGTATTTCTGTGCCAGCAGCCGTACTAGCGGGGGGGCCACCGGGGAGCTGTTTTTTGGAGAA	CASSRTSGGATGELFF	8	9.19424e-05	TCRBV03	TCRBD02-01*01	TCRBJ02-02*01
AATTCCCTGGAGCTTGGTGACTCTGCTGTGTATTTCTGTGCCAGCAGCCACGTCCGGGCAACTGGAAACACCATATATTTTGGAGAG	CASSHVRATGNTIYF	8	9.19424e-05	TCRBV03		TCRBJ01-03*01
TCCCTGGAGCTTGGTGACTCTGCTGTGTATTTCTGTGCCAGCAGCCAGACCTTCCGCTCTGGGGCCAACGTCCTGACTTTCGGGGCC	CASSQTFRSGANVLTF	8	9.19424e-05	TCRBV03		TCRBJ02-06*01
ATCCAGCCCTCAGAACCCAGGGACTCAGCTGTGTACTTCTGTGCCAGCAGCGCCCAGGAAGAGGGAACTGAGCAGTTCTTCGGGCCA	CASSAQEEGTEQFF	8	9.19424e-05	TCRBV12	TCRBD02-01*02	TCRBJ02-01*01
ATCAATTCCCTGGAGCTTGGTGACTCTGCTGTGTATTTCTGTGCCAGCAGCCAGACGCCTAAAATCAATGAGCAGTTCTTCGGGCCA	CASSQTPKINEQFF	8	9.19424e-05	TCRBV03		TCRBJ02-01*01
ACCAGTGCCCATCCTGAAGACAGCAGCTTCTACATCTGCAGTGCTGGACTAGCGGGGGGGCCGGGGAATGAGCAGTTCTTCGGGCCA	CSAGLAGGPGNEQFF	8	9.19424e-05	TCRBV20	TCRBD02-01*01	TCRBJ02-01*01
CTGAAGATCCAGCCCTCAGAACCCAGGGACTCAGCTGTGTACTTCTGTGCCAGCAGTTTTTTTCCCTACGAGCAGTACTTCGGGCCG	CASSFFPYEQYF	8	9.19424e-05	TCRBV12		TCRBJ02-07*01
CTGAAGATCCAGCCCTCAGAACCCAGGGACTCAGCTGTGTACTTCTGTGCCAGCAGATCTACCAGTAGGGGCTACACCTTCGGTTCG	CASRSTSRGYTF	8	9.19424e-05	TCRBV12		TCRBJ01-02*01
ATCAATTCCCTGGAGCTTGGTGACTCTGCTGTGTATTTCTGTGCCAGCAGCTCGAGTAGCTCTGGAAACACCATATATTTTGGAGAG	CASSSSSSGNTIYF	8	9.19424e-05	TCRBV03	TCRBD02-01	TCRBJ01-03*01
GTGACCAGTGCCCATCCTGAAGACAGCAGCTTCTACATCTGCAGTGCTGGCCCAGGGGAAGGGAACACTGAAGCTTTCTTTGGACAA	CSAGPGEGNTEAFF	8	9.19424e-05	TCRBV20	TCRBD01-01*01	TCRBJ01-01*01
ATCCAGCCCTCAGAACCCAGGGACTCAGCTGTGTACTTCTGTGCCAGCAGGCGGGGGGCGGGGGCAGATACGCAGTATTTTGGCCCA	CASRRGAGADTQYF	8	9.19424e-05	TCRBV12	TCRBD02-01*01	TCRBJ02-03*01
TCCCTAGAGTCTGCCATCCCCAACCAGACAGCTCTTTACTTCTGTGCCACCAGTGGAGGGGGCAATCAGCCCCAGCATTTTGGTGAT	CATSGGGNQPQHF	8	9.19424e-05	TCRBV24		TCRBJ01-05*01
TCGGCTGCTCCCTCCCAGACATCTGTGTACTTCTGTGCCAGCAGTCCCGTCCCGGGGGGGCGGGCCGGGGAGCTGTTTTTTGGAGAA	CASSPVPGGRAGELFF	8	9.19424e-05	TCRBV06	TCRBD02-01*01	TCRBJ02-02*01
GCCCATCCTGAAGACAGCAGCTTCTACATCTGCAGTGCTAGAGATGGCGCGCGAGGGGCTTTCGATTCACCCCTCCACTTTGGGAAC	CSARDGARGAFDSPLHF	8	9.19424e-05	TCRBV20		TCRBJ01-06*01
CCCTCAGAACCCAGGGACTCAGCTGTGTACTTCTGTGCCAGCAGTTTAGGTATAGCGGAATTATACAATGAGCAGTTCTTCGGGCCA	CASSLGIAELYNEQFF	8	9.19424e-05	TCRBV12	TCRBD02-01	TCRBJ02-01*01
AAGATCCAGCCCTCAGAACCCAGGGACTCAGCTGTGTACTTCTGTGCCAGCACTAACGGGGCATTTAGCCAAGCTTTCTTTGGACAA	CASTNGAFSQAFF	8	9.19424e-05	TCRBV12		TCRBJ01-01*01
CAGCCCTCAGAACCCAGGGACTCAGCTGTGTACTTCTGTGCCAGCAGTCCGGCGGGGGACAGCTCCTACGAGCAGTACTTCGGGCCG	CASSPAGDSSYEQYF	8	9.19424e-05	TCRBV12		TCRBJ02-07*01
ATCCAGCCCTCAGAACCCAGGGACTCAGCTGTGTACTTCTGTGCCAGCAGTTTAGACCGGACAGGGGTCGAGCAGTACTTCGGGCCG	CASSLDRTGVEQYF	8	9.19424e-05	TCRBV12	TCRBD01-01*01	TCRBJ02-07*01
ACAGTGACCAGTGCCCATCCTGAAGACAGCAGCTTCTACATCTGCAGTGCTAGAGCTAGTCAGGTGAAAAGCTACACCTTCGGTTCG	CSARASQVKSYTF	8	9.19424e-05	TCRBV20		TCRBJ01-02*01
ACAGTGACCAGTGCCCATCCTGAAGACAGCAGCTTCTACATCTGCAGTGGCCCACAGGCGGGACGTGCTGAAGCTTTCTTTGGACAA	CSGPQAGRAEAFF	8	9.19424e-05	TCRBV20	TCRBD02-01*02	TCRBJ01-01*01
CTGACAGTGACCAGTGCCCATCCTGAAGACAGCAGCTTCTACATCTGCAGTGCTACCACCAGGGCCCCTGGCTACACCTTCGGTTCG	CSATTRAPGYTF	8	9.19424e-05	TCRBV20	TCRBD01-01*01	TCRBJ01-02*01
ACAGTGACCAGTGCCCATCCTGAAGACAGCAGCTTCTACATCTGCAGTGCTCCCGACAGTTGGAACACTGAAGCTTTCTTTGGACAA	CSAPDSWNTEAFF	8	9.19424e-05	TCRBV20	TCRBD01-01*01	TCRBJ01-01*01
TTGTTGCTAGGGGACTCGGCCCTCTATCTCTGTGCCAGCAGCTTGGCTTTCGGCAGGGGCAGGAACACTGAAGCTTTCTTTGGACAA	CASSLAFGRGRNTEAFF	7	8.04496e-05	TCRBV05-07*01	TCRBD01-01*01	TCRBJ01-01*01
CCAGAAGACTCGGCCCTGTATCTCTGTGCCAGCAGCCAACTACCGGGACTAGCGGGGGGCCTCCAAGAGACCCAGTACTTCGGGCCA	CASSQLPGLAGGLQETQYF	7	8.04496e-05	TCRBV04-02*01	TCRBD02-01*01	TCRBJ02-05*01
CTGACGATCCAGCGCACAGAGCAGCGGGACTCGGCCATGTATCGCTGTGCCAGCAGCTTGTTTCCCGGGGAGCTGTTTTTTGGAGAA	CASSLFPGELFF	7	8.04496e-05	TCRBV07-06*01		TCRBJ02-02*01
ACCCTGCAGCCAGAAGACTCGGCCCTGTATCTCTGCGCCAGCAGCCAAGTAGGGGCCCGTTTTAACTATGGCTACACCTTCGGTTCG	CASSQVGARFNYGYTF	7	8.04496e-05	TCRBV04-03*01	TCRBD01-01*01	TCRBJ01-02*01
CACCTACACACCCTGCAGCCAGAAGACTCGGCCCTGTATCTCTGCGCCAGCAGCCAAGGACAGAACTATGGCTACACCTTCGGTTCG	CASSQGQNYGYTF	7	8.04496e-05	TCRBV04-03*01	TCRBD01-01*01	TCRBJ01-02*01
GTGAACGCCTTGTTGCTGGGGGACTCGGCCCTGTATCTCTGTGCCAGCAGCTTGGCACAGGGGATGGATACGCAGTATTTTGGCCCA	CASSLAQGMDTQYF	7	8.04496e-05	TCRBV05-05*01	TCRBD01-01*01	TCRBJ02-03*01
CTGGAGTCGGCTGCTCCCTCCCAGACATCTGTGTACTTCTGTGCCAGCCGAAAAATTCAGGGTACCTACGAGCAGTACTTCGGGCCG	CASRKIQGTYEQYF	7	8.04496e-05	TCRBV06-01*01	TCRBD01-01*01	TCRBJ02-07*01
CTCAGGCTGGAGTCGGCTGCTCCCTCCCAGACATCTGTGTACTTCTGTGCCAGCAGAGGGCAATCCTACGAGCAGTACTTCGGGCCG	CASRGQSYEQYF	7	8.04496e-05	TCRBV06-01*01		TCRBJ02-07*01
AGGCTGGAGTCGGCTGCTCCCTCCCAGACATCTGTGTACTTCTGTGCCAGCTCGGCTAACAGGGTCAACGAGCAGTACTTCGGGCCG	CASSANRVNEQYF	7	8.04496e-05	TCRBV06-01*01	TCRBD01-01*01	TCRBJ02-07*01
GAGTCGGCTGCTCCCTCCCAGACATCTGTGTACTTCTGTGCCAGCAGTGAGAAGGTGGCAGGAAATCAGCCCCAGCATTTTGGTGAT	CASSEKVAGNQPQHF	7	8.04496e-05	TCRBV06-01*01	TCRBD01-01*01	TCRBJ01-05*01
GTGAACGCCTTGTTGCTGGGGGACTCGGCCCTCTATCTCTGTGCCAGCAGCCCTGGACAGGGGTGGCGGGAGCAGTACTTCGGGCCG	CASSPGQGWREQYF	7	8.04496e-05	TCRBV05-06*01	TCRBD01-01*01	TCRBJ02-07*01
CTGAATGTGAACGCCTTGTTGCTGGGGGACTCGGCCCTCTATCTCTGTGCCAGCAGCCCCCTGGGAAGGGGCTACACCTTCGGTTCG	CASSPLGRGYTF	7	8.04496e-05	TCRBV05-06*01		TCRBJ01-02*01
GCCTTGTTGCTGGGGGACTCGGCCCTCTATCTCTGTGCCAGCAGCCGGCGGCTGTCGGGGGCCCAAGAGACCCAGTACTTCGGGCCA	CASSRRLSGAQETQYF	7	8.04496e-05	TCRBV05-06*01		TCRBJ02-05*01
CACGCCCTGCAGCCAGAAGACTCAGCCCTGTATCTCTGCGCCAGCAGCCAAGTGGACAGCAACACCGGGGAGCTGTTTTTTGGAGAA	CASSQVDSNTGELFF	7	8.04496e-05	TCRBV04-01*01	TCRBD01-01*01	TCRBJ02-02*01
GCCCTGCAGCCAGAAGACTCAGCCCTGTATCTCTGCGCCAGCAGCCGGGGACAGGGGAGCGGTGGAAACACCATATATTTTGGAGAG	CASSRGQGSGGNTIYF	7	8.04496e-05	TCRBV04-01*01	TCRBD01-01*01	TCRBJ01-03*01
CACGCCCTGCAGCCAGAAGACTCAGCCCTGTATCTCTGCGCCAGCAGCCAAGACGAGCAGGGTACCTACGAGCAGTACTTCGGGCCG	CASSQDEQGTYEQYF	7	8.04496e-05	TCRBV04-01*01	TCRBD01-01*01	TCRBJ02-07*01
GCCCTGCAGCCAGAAGACTCAGCCCTGTATCTCTGCGCCAGCAGCCAAGGACAGTCCTCTGGGGCCAACGTCCTGACTTTCGGGGCC	CASSQGQSSGANVLTF	7	8.04496e-05	TCRBV04-01*01	TCRBD01-01*01	TCRBJ02-06*01
CTGGAGTTGGCTGCTCCCTCCCAGACATCTGTGTACTTCTGTGCCAGCAGTCCACAGGGAATGGCCTACGAGCAGTACTTCGGGCCG	CASSPQGMAYEQYF	7	8.04496e-05	TCRBV06-06	TCRBD01-01*01	TCRBJ02-07*01
AAGATCCGGTCCACAAAGCTGGAGGACTCAGCCATGTACTTCTGTGCCAGCACGGGTCAAGTGGGCTACGAGCAGTACTTCGGGCCG	CASTGQVGYEQYF	7	8.04496e-05	TCRBV02-01*01	TCRBD02-01	TCRBJ02-07*01
AGCTCTCTGGAGCTGGGGGACTCAGCTTTGTATTTCTGTGCCAGCAGCGTAGTTGGGGGTTCTGGAAACACCATATATTTTGGAGAG	CASSVVGGSGNTIYF	7	8.04496e-05	TCRBV09-01		TCRBJ01-03*01
CTGAGCTCTCTGGAGCTGGGGGACTCAGCTTTGTATTTCTGTGCCAGCAGCGATTGGAGGGATAGCACTGAAGCTTTCTTTGGACAA	CASSDWRDSTEAFF	7	8.04496e-05	TCRBV09-01	TCRBD02-01*02	TCRBJ01-01*01
AGCTCTCTGGAGCTGGGGGACTCAGCTTTGTATTTCTGTGCCAGCAGCCCCTCGACAGGGGGGTATCAGCCCCAGCATTTTGGTGAT	CASSPSTGGYQPQHF	7	8.04496e-05	TCRBV09-01	TCRBD01-01*01	TCRBJ01-05*01
TTGGAGCTGGACGACTCGGCCCTGTATCTCTGTGCCAGCAGCTTGGGACAGGGTTGGGACTATAATTCACCCCTCCACTTTGGGAAC	CASSLGQGWDYNSPLHF	7	8.04496e-05	TCRBV05-04*01	TCRBD01-01*01	TCRBJ01-06*01
GTGAACGCCTTGGAGCTGGACGACTCGGCCCTGTATCTCTGTGCCAGCAGCTTAGGGGGCGCGGGTTCACCCCTCCACTTTGGGAAC	CASSLGGAGSPLHF	7	8.04496e-05	TCRBV05-04*01	TCRBD01-01*01	TCRBJ01-06*01
AACGCCTTGGAGCTGGACGACTCGGCCCTGTATCTCTGTGCCAGCATCGGGACAGGGGGCGAACCTTCACCCCTCCACTTTGGGAAC	CASIGTGGEPSPLHF	7	8.04496e-05	TCRBV05-04*01	TCRBD01-01*01	TCRBJ01-06*01
GAGTCGGCTGCTCCCTCCCAGACATCTGTGTACTTCTGTGCCAGCAGTGAATTAGCGGGGGGGCCAGATACGCAGTATTTTGGCCCA	CASSELAGGPDTQYF	7	8.04496e-05	TCRBV06-01*01	TCRBD02-01*01	TCRBJ02-03*01
CTCAGGCTGGAGTCGGCTGCTCCCTCCCAGACATCTGTGTACTTCTGTGCCAGCAGTGGAGTATCCTACGAGCAGTACTTCGGGCCG	CASSGVSYEQYF	7	8.04496e-05	TCRBV06-01*01	TCRBD02-01*02	TCRBJ02-07*01
CAGCGCACAGAGCGGGGGGACTCAGCCGTGTATCTCTGTGCCAGCAGCTTATCCGCCAGGGGGAACACTGAAGCTTTCTTTGGACAA	CASSLSARGNTEAFF	7	8.04496e-05	TCRBV07-03*01	TCRBD01-01*01	TCRBJ01-01*01
CGCACAGAGCGGGGGGACTCAGCCGTGTATCTCTGTGCCAGCAGCTTACTGCCCTCTTTTATGAACACTGAAGCTTTCTTTGGACAA	CASSLLPSFMNTEAFF	7	8.04496e-05	TCRBV07-03*01		TCRBJ01-01*01
CAGCGCACAGAGCAGGGGGACTCAGCCGTGTATCTCCGTGCCAGCAGGCCTCACAGGGGGCCGAGGAGTGAAGCTTTCTTTGGACAA	RASRPHRGPRSEAFF	7	8.04496e-05	TCRBV07-03*02	TCRBD01-01*01	TCRBJ01-01*01
CAGCGCACAGAGCGGGGGGACTCAGCCGTGTATCTCTGTGCCAGCAGCCAGGGACTAGCGGGGTGGCAGACCCAGTACTTCGGGCCA	CASSQGLAGWQTQYF	7	8.04496e-05	TCRBV07-03*01	TCRBD02-01*01	TCRBJ02-05*01
AAGATCCAGCGCACAGAGCGGGGGGACTCAGCCGTGTATCTCTGTGCCAGCAGCTTATCGGCGAACACTGAAGCTTTCTTTGGACAA	CASSLSANTEAFF	7	8.04496e-05	TCRBV07-03*01		TCRBJ01-01*01
CAGCGCACAGAGCGGGGGGACTCAGCCGTGTATCTCTGTGCCAGCAGCTTAACGGGGGATTACACAGATACGCAGTATTTTGGCCCA	CASSLTGDYTDTQYF	7	8.04496e-05	TCRBV07-03*01		TCRBJ02-03*01
ATCCGGTCCACAAAGCTGGAGGACTCAGCCATGTACTTCTGTGCCAGCAGTGAACTGCACGTCACCGGGGAGCTGTTTTTTGGAGAA	CASSELHVTGELFF	7	8.04496e-05	TCRBV02-01*01		TCRBJ02-02*01
CGGTCCACAAAGCTGGAGGACTCAGCCATGTACTTCTGTGCCAGCAGTTCTACTAGGGGACCAAGGGGTGAAGCTTTCTTTGGACAA	CASSSTRGPRGEAFF	7	8.04496e-05	TCRBV02-01*01		TCRBJ01-01*01
CTGAAGATCCGGTCCACAAAGCTGGAGGACTCAGCCATGTACTTCTGTGCCAGCCTCGGGGGCCTCTACGAGCAGTACTTCGGGCCG	CASLGGLYEQYF	7	8.04496e-05	TCRBV02-01*01		TCRBJ02-07*01
ATCCGGTCCACAAAGCTGGAGGACTCAGCCATGTACTTCTGTGCCAGCAGTGTTGGCAGCTCCTACAATGAGCAGTTCTTCGGGCCA	CASSVGSSYNEQFF	7	8.04496e-05	TCRBV02-01*01	TCRBD01-01*01	TCRBJ02-01*01
ATCCGGTCCACAAAGCTGGAGGACTCAGCCATGTACTTCTGTGCCAGCAGTGAGTTAAATAGCAATCAGCCCCAGCATTTTGGTGAT	CASSELNSNQPQHF	7	8.04496e-05	TCRBV02-01*01	TCRBD02-01	TCRBJ01-05*01
TCCACAAAGCTGGAGGACTCAGCCATGTACTTCTGTGCCAGCAGAGTCGACAGGACTGCAACTAATGAAAAACTGTTTTTTGGCAGT	CASRVDRTATNEKLFF	7	8.04496e-05	TCRBV02-01*01	TCRBD01-01*01	TCRBJ01-04*01
ATCCGGTCCACAAAGCTGGAGGACTCAGCCATGTACTTCTGTGCCAGCAGTGAATCTGGGGGGTTGGAGCCCCAGCATTTTGGTGAT	CASSESGGLEPQHF	7	8.04496e-05	TCRBV02-01*01	TCRBD02-01*01	TCRBJ01-05*01
ACAAAGCTGGAGGACTCAGCCATGTACTTCTGTGCCAGCAGTGAATTCCGGGGGACAGGTTCTGATTCACCCCTCCACTTTGGGAAC	CASSEFRGTGSDSPLHF	7	8.04496e-05	TCRBV02-01*01	TCRBD01-01*01	TCRBJ01-06*01
AAGATCCGGTCCACAAAGCTGGAGGACTCAGCCATGTACTTCTGTGCCAGCAAGCAGGACAGCTCCTACGAGCAGTACTTCGGGCCG	CASKQDSSYEQYF	7	8.04496e-05	TCRBV02-01*01	TCRBD01-01*01	TCRBJ02-07*01
TCCACAAAGCTGGAGGACTCAGCCATGTACTTCTGTGCCAGCAGTGCCCCCGACGGGGGGGCAACAGATACGCAGTATTTTGGCCCA	CASSAPDGGATDTQYF	7	8.04496e-05	TCRBV02-01*01	TCRBD02-01*01	TCRBJ02-03*01
GTGCAGCCTGCAGAACTGGAGGATTCTGGAGTTTATTTCTGTGCCAGCAGCCGAACCGGGACAGGGGATGAGCAGTTCTTCGGGCCA	CASSRTGTGDEQFF	7	8.04496e-05	TCRBV14-01*01	TCRBD01-01*01	TCRBJ02-01*01
AAGGTGCAGCCTGCAGAACTGGAGGATTCTGGAGTTTATTTCTGTGCCAGCAGCCTTTATTTTAATTCACCCCTCCACTTTGGGAAC	CASSLYFNSPLHF	7	8.04496e-05	TCRBV14-01*01	TCRBD02-01	TCRBJ01-06*01
GCAGAACTGGAGGATTCTGGAGTTTATTTCTGTGCCAGCAGCCAGGCTAGCGGGGGGGCTTATCCCTACGAGCAGTACTTCGGGCCG	CASSQASGGAYPYEQYF	7	8.04496e-05	TCRBV14-01*01	TCRBD02-01*01	TCRBJ02-07*01
GAGCTGAATGTGAACGCCTTGGAGCTGGACGACTCGGCCCTGTATCTCTGTGCCAGCAGCCGCCAAGAGACCCAGTACTTCGGGCCA	CASSRQETQYF	7	8.04496e-05	TCRBV05-04*01	TCRBD02-01	TCRBJ02-05*01
ATCCAGCAGGTAGTGCGAGGAGATTCGGCAGCTTATTTCTGTGCCAGCTCACCACAAAAGATCACCGGGGAGCTGTTTTTTGGAGAA	CASSPQKITGELFF	7	8.04496e-05	TCRBV18-01*01		TCRBJ02-02*01
CTGTCGGCTGCTCCCTCCCAGACATCTGTGTACTTCTGTGCCAGCAGTTACGTCGGGGGGCGAGGTACTGAAGCTTTCTTTGGACAA	CASSYVGGRGTEAFF	7	8.04496e-05	TCRBV06-05*01	TCRBD02-01*01	TCRBJ01-01*01
TCGGCTGCTCCCTCCCAGACATCTGTGTACTTCTGTGCCAGCAGTTACTCGAACAGTATGGGGGCCGGGGAGCTGTTTTTTGGAGAA	CASSYSNSMGAGELFF	7	8.04496e-05	TCRBV06-05*01		TCRBJ02-02*01
CTGAAGATCCGGTCCACAAAGCTGGAGGACTCAGCCATGTACTTCTGTGCCAGCAGCGTAAACGTTTACGAGCAGTACTTCGGGCCG	CASSVNVYEQYF	7	8.04496e-05	TCRBV02-01*01		TCRBJ02-07*01
CTCACGTTGGCGTCTGCTGTACCCTCTCAGACATCTGTGTACTTCTGTGCCAGCAGTGAAGGGACAGATACGCAGTATTTTGGCCCA	CASSEGTDTQYF	7	8.04496e-05	TCRBV06-04		TCRBJ02-03*01
ACGTTGGCGTCTGCTGTACCCTCTCAGACATCTGTGTACTTCTGTGCCAGCAGTGACTCCGACACCGGGGAGCTGTTTTTTGGAGAA	CASSDSDTGELFF	7	8.04496e-05	TCRBV06-04	TCRBD02-01	TCRBJ02-02*01
TCTGCTGTACCCTCTCAGACATCTGTGTACTTCTGTGCCAGCCTCCTTACTCCCGGGACTGAGAACACTGAAGCTTTCTTTGGACAA	CASLLTPGTENTEAFF	7	8.04496e-05	TCRBV06-04	TCRBD02-01	TCRBJ01-01*01
AGCACCTTGGAGCTGGGGGACTCGGCCCTTTATCTTTGCGCCAGCAACCGCGGGGGGAACTCCTACAATGAGCAGTTCTTCGGGCCA	CASNRGGNSYNEQFF	7	8.04496e-05	TCRBV05-01*01	TCRBD02-01*01	TCRBJ02-01*01
AATGTGAGCACCTTGGAGCTGGGGGACTCGGCCCTTTATCTTTGCGCCAGCAGCTTGCCTAGCCAAGAGACCCAGTACTTCGGGCCA	CASSLPSQETQYF	7	8.04496e-05	TCRBV05-01*01	TCRBD02-01	TCRBJ02-05*01
CTGAAGATCCAGCGCACACAGCAGGAGGACTCCGCCGTGTATCTCTGTGCCAGCAGCTTGCATCTGACTCAGCAGTTCTTCGGGCCA	CASSLHLTQQFF	7	8.04496e-05	TCRBV07-08*01	TCRBD02-01	TCRBJ02-01*01
AAGATCCAGCGCACACAGCAGGAGGACTCCGCCGTGTATCTCTGTGCCAGCAGCTTATCGGGCCCCGCCGAGCAGTACTTCGGGCCG	CASSLSGPAEQYF	7	8.04496e-05	TCRBV07-08*01		TCRBJ02-07*01
AAGATCCAGCGCACACAGCAGGAGGACTCCGCCGTGTATCTCTGTGCCAGCAGCTTAACAGGGGGCACTGAAGCTTTCTTTGGACAA	CASSLTGGTEAFF	7	8.04496e-05	TCRBV07-08*01	TCRBD01-01*01	TCRBJ01-01*01
CTGGAGTCAGCTACCCGCTCCCAGACATCTGTGTATTTCTGCGCCAGCAGTGACGGGGGGCTTAATTCACCCCTCCACTTTGGGAAC	CASSDGGLNSPLHF	7	8.04496e-05	TCRBV10-02*01	TCRBD02-01*01	TCRBJ01-06*01
AGGATCCAGCAGGTAGTGCGAGGAGATTCGGCAGCTTATTTCTGTGCCAGCTCACCCTTCGAGTCGCACGAGCAGTACTTCGGGCCG	CASSPFESHEQYF	7	8.04496e-05	TCRBV18-01*01	TCRBD02-01*02	TCRBJ02-07*01
CAGCAGGTAGTGCGAGGAGATTCGGCAGCTTATTTCTGTGCCAGCTCACCACCGGCTGAGACTGGAAACACCATATATTTTGGAGAG	CASSPPAETGNTIYF	7	8.04496e-05	TCRBV18-01*01		TCRBJ01-03*01
ATCCAGCAGGTAGTGCGAGGAGATTCGGCAGCTTATTTCTGTGCCAGCTCACCGGACAGGGCGATCAACGAGCAGTACTTCGGGCCG	CASSPDRAINEQYF	7	8.04496e-05	TCRBV18-01*01	TCRBD01-01*01	TCRBJ02-07*01
CTGAGGATCCAGCAGGTAGTGCGAGGAGATTCGGCAGCTTATTTCTGTGCCAGCTCATCAGTGAACACTGAAGCTTTCTTTGGACAA	CASSSVNTEAFF	7	8.04496e-05	TCRBV18-01*01	TCRBD01-01*01	TCRBJ01-01*01
CAGGTAGTGCGAGGAGATTCGGCAGCTTATTTCTGTGCCAGCTCACAGACTAGCGGGGGATACCAAGAGACCCAGTACTTCGGGCCA	CASSQTSGGYQETQYF	7	8.04496e-05	TCRBV18-01*01	TCRBD02-01*01	TCRBJ02-05*01
ATCCAGCAGGTAGTGCGAGGAGATTCGGCAGCTTATTTCTGTGCCAGCTCACAAGGACAGGGGTCCCACGAGCAGTACTTCGGGCCG	CASSQGQGSHEQYF	7	8.04496e-05	TCRBV18-01*01	TCRBD01-01*01	TCRBJ02-07*01
AGGATCCAGCAGGTAGTGCGAGGAGATTCGGCAGCTTATTTCTGTGCCAGCTCCCTGGGAGCGACCTACGAGCAGTACTTCGGGCCG	CASSLGATYEQYF	7	8.04496e-05	TCRBV18-01*01	TCRBD02-01*02	TCRBJ02-07*01
AGGCTGCTGTCGGCTGCTCCCTCCCAGACATCTGTGTACTTCTGTGCCAGCAGTCCCCCAGGCACAGATACGCAGTATTTTGGCCCA	CASSPPGTDTQYF	7	8.04496e-05	TCRBV06-05*01	TCRBD01-01*01	TCRBJ02-03*01
CTGCTGTCGGCTGCTCCCTCCCAGACATCTGTGTACTTCTGTGCCAGCAAAGGGACAGGGGGTAATCAGCCCCAGCATTTTGGTGAT	CASKGTGGNQPQHF	7	8.04496e-05	TCRBV06-05*01	TCRBD01-01*01	TCRBJ01-05*01
TCGGCTGCTCCCTCCCAGACATCTGTGTACTTCTGTGCCAGCAGTTACTCAGGGTTGGGTCCTGGAAACACCATATATTTTGGAGAG	CASSYSGLGPGNTIYF	7	8.04496e-05	TCRBV06-05*01		TCRBJ01-03*01
CTGCTGTCGGCTGCTCCCTCCCAGACATCTGTGTACTTCTGTGCCAGCAGTCGCAGGGGCACCCAAGAGACCCAGTACTTCGGGCCA	CASSRRGTQETQYF	7	8.04496e-05	TCRBV06-05*01	TCRBD01-01*01	TCRBJ02-05*01
CTGTCGGCTGCTCCCTCCCAGACATCTGTGTACTTCTGTGCCAGCAGTTACGTCCAGGGGGTTTCCTACGAGCAGTACTTCGGGCCG	CASSYVQGVSYEQYF	7	8.04496e-05	TCRBV06-05*01	TCRBD01-01*01	TCRBJ02-07*01
CCGCTCAGGCTGCTGTCGGCTGCTCCCTCCCAGACATCTGTGTACTTCTGTGCCACCGGACAGAACTACGAGCAGTACTTCGGGCCG	CATGQNYEQYF	7	8.04496e-05	TCRBV06-05*01	TCRBD01-01*01	TCRBJ02-07*01
CTGTCGGCTGCTCCCTCCCAGACATCTGTGTACTTCTGTGCCAGCAGTTACCGGGACAGGGGATTCTACGAGCAGTACTTCGGGCCG	CASSYRDRGFYEQYF	7	8.04496e-05	TCRBV06-05*01	TCRBD01-01*01	TCRBJ02-07*01
AGGCTGCTGTCGGCTGCTCCCTCCCAGACATCTGTGTACTTCTGTGCCAGCGGGGACAGAAGCAATCAGCCCCAGCATTTTGGTGAT	CASGDRSNQPQHF	7	8.04496e-05	TCRBV06-05*01	TCRBD01-01*01	TCRBJ01-05*01
CAGCGCACAGAGCAGGGGGACTCGGCCATGTATCTCTGTGCCAGCAGTTGGGGACAGGGGGTAAAAAATGAGCAGTTCTTCGGGCCA	CASSWGQGVKNEQFF	7	8.04496e-05	TCRBV07-09	TCRBD01-01*01	TCRBJ02-01*01
CAGCGCACAGAGCAGGGGGACTCGGCCATGTATCTCTGTGCCAGCAGCTCTACGACAGGGATGGCTGAAAAACTGTTTTTTGGCAGT	CASSSTTGMAEKLFF	7	8.04496e-05	TCRBV07-09	TCRBD01-01*01	TCRBJ01-04*01
ACCTTGGAGATCCAGCGCACAGAGCAGGGGGACTCGGCCATGTATCTCTGTGCCAGCAGCTCCCCCGCCGTAGACACCTTCGGTTCG	CASSSPAVDTF	7	8.04496e-05	TCRBV07-09	TCRBD02-01	TCRBJ01-02*01
GAGATCCAGCGCACAGAGCAGGGGGACTCGGCCATGTATCTCTGTGCCACCTCGGGGGCGAAGGGTAATGAGCAGTTCTTCGGGCCA	CATSGAKGNEQFF	7	8.04496e-05	TCRBV07-09		TCRBJ02-01*01
AGCACCTTGGAGCTGGGGGACTCGGCCCTTTATCTTTGCGCCAGCAGCTTTCAGGGGAATGAGAACAATGAGCAGTTCTTCGGGCCA	CASSFQGNENNEQFF	7	8.04496e-05	TCRBV05-01*01	TCRBD01-01*01	TCRBJ02-01*01
ACCTTGGAGCTGGGGGACTCGGCCCTTTATCTTTGCGCCAGCAGCTCCCAGACTAGCGGCCTTAAGGGGGAGCAGTTCTTCGGGCCA	CASSSQTSGLKGEQFF	7	8.04496e-05	TCRBV05-01*01	TCRBD02-01	TCRBJ02-01*01
AGCACCTTGGAGCTGGGGGACTCGGCCCTTTATCTTTGCGCCAGCAGCCCAATCATCCGGGACAATTCACCCCTCCACTTTGGGAAC	CASSPIIRDNSPLHF	7	8.04496e-05	TCRBV05-01*01		TCRBJ01-06*01
AATGTGAGCACCTTGGAGCTGGGGGACTCGGCCCTTTATCTTTGCGCCAGCAGCTTGGACCCTAACTATGGCTACACCTTCGGTTCG	CASSLDPNYGYTF	7	8.04496e-05	TCRBV05-01*01		TCRBJ01-02*01
ATTCTGGAGTCCGCCAGCACCAACCAGACATCTATGTACCTCTGTGCCAGCACCGGGGATCTCAATCAGCCCCAGCATTTTGGTGAT	CASTGDLNQPQHF	7	8.04496e-05	TCRBV28-01*01	TCRBD02-01*01	TCRBJ01-05*01
CTGGAGTCGCCCAGCCCCAACCAGACCTCTCTGTACTTCTGTGCCAGCAGTTTGGGGGGGTCCTACAATGAGCAGTTCTTCGGGCCA	CASSLGGSYNEQFF	7	8.04496e-05	TCRBV27-01*01	TCRBD02-01*01	TCRBJ02-01*01
CTCACTCTGGAGTCCGCTACCAGCTCCCAGACATCTGTGTACTTCTGTGCCATCAACAAACAGGGGGGCACCATATATTTTGGAGAG	CAINKQGGTIYF	7	8.04496e-05	TCRBV10-03*01	TCRBD01-01*01	TCRBJ01-03*01
CTGGAGTCCGCTACCAGCTCCCAGACATCTGTGTACTTCTGTGCCATCAGTGAGGGAAGGGACGCTGAAAAACTGTTTTTTGGCAGT	CAISEGRDAEKLFF	7	8.04496e-05	TCRBV10-03*01		TCRBJ01-04*01
GAGTCCGCTACCAGCTCCCAGACATCTGTGTACTTCTGTGCCATCAGTGAGTCTACACTAAGCAATCAGCCCCAGCATTTTGGTGAT	CAISESTLSNQPQHF	7	8.04496e-05	TCRBV10-03*01	TCRBD02-01	TCRBJ01-05*01
CCCAGCCCCAACCAGACCTCTCTGTACTTCTGTGCCAGCAGTTTATATCCCCCGGGACAGGGTGGCTACGAGCAGTACTTCGGGCCG	CASSLYPPGQGGYEQYF	7	8.04496e-05	TCRBV27-01*01	TCRBD01-01*01	TCRBJ02-07*01
TCGCCCAGCCCCAACCAGACCTCTCTGTACTTCTGTGCCAGCAGTTCTGGAGGGGCGCTTAACGAGGAGACCCAGTACTTCGGGCCA	CASSSGGALNEETQYF	7	8.04496e-05	TCRBV27-01*01	TCRBD02-01*02	TCRBJ02-05*01
CTGGAGTCGCCCAGCCCCAACCAGACCTCTCTGTACTTCTGTGCCAGCAGTTTCGGGGGACAGCACGAGACCCAGTACTTCGGGCCA	CASSFGGQHETQYF	7	8.04496e-05	TCRBV27-01*01	TCRBD01-01*01	TCRBJ02-05*01
CCCAACCAGACCTCTCTGTACTTCTGTGCCAGCAGTCCCGGACTAGCGGGGGCCGACCACGACTACAATGAGCAGTTCTTCGGGCCA	CASSPGLAGADHDYNEQFF	7	8.04496e-05	TCRBV27-01*01	TCRBD02-01*01	TCRBJ02-01*01
CTGGAGTCGCCCAGCCCCAACCAGACCTCTCTGTACTTCTGTGCCAGCAGCCCTGGGACAGGGGGCTCTGAAGCTTTCTTTGGACAA	CASSPGTGGSEAFF	7	8.04496e-05	TCRBV27-01*01	TCRBD01-01*01	TCRBJ01-01*01
GAGTCAGGGGACACAGCACTGTATTTCTGTGCCAGCAGCAAAAAGCCCCGCGGAACCCGACGAAACTACGAGCAGTACTTCGGGCCG	CASSKKPRGTRRNYEQYF	7	8.04496e-05	TCRBV21-01*01	TCRBD02-01	TCRBJ02-07*01
ACGGAGTCAGGGGACACAGCACTGTATTTCTGTGCCAGCAGCAAAGCCGGCGGCAGTTATAGCAATCAGCCCCAGCATTTTGGTGAT	CASSKAGGSYSNQPQHF	7	8.04496e-05	TCRBV21-01*01	TCRBD02-01	TCRBJ01-05*01
ATCCAGTCCACGGAGTCAGGGGACACAGCACTGTATTTCTGTGCCAGCAGCAAAGAAACAGTTTGCTACGAGCAGTACTTCGGGCCG	CASSKETVCYEQYF	7	8.04496e-05	TCRBV21-01*01	TCRBD01-01*01	TCRBJ02-07*01
TGTACCTTGGAGATCCAGTCCACGGAGTCAGGGGACACAGCACTGTATTTCTGTGCCAGCAGGGATTCACCCCTCCACTTTGGGAAC	CASRDSPLHF	7	8.04496e-05	TCRBV21-01*01		TCRBJ01-06*01
CAGCGCACACAGCAGGAGGACTCGGCCGTGTATCTCTGTGCCAGCAGCTACTACAGGGGTGGAAGCTATGGCTACACCTTCGGTTCG	CASSYYRGGSYGYTF	7	8.04496e-05	TCRBV07-02*01	TCRBD01-01*01	TCRBJ01-02*01
ATCCAGCGCACACAGCAGGAGGACTCGGCCGTGTATCTCTGTGCCAGCAGCGTAGGACTAAGCACAGATACGCAGTATTTTGGCCCA	CASSVGLSTDTQYF	7	8.04496e-05	TCRBV07-02*01	TCRBD02-01	TCRBJ02-03*01
CAGCGCACACAGCAGGAGGACTCGGCCGTGTATCTCTGTGCCAGCAGCCCGCGCATGATGCCAGGTGAAAAACTGTTTTTTGGCAGT	CASSPRMMPGEKLFF	7	8.04496e-05	TCRBV07-02*01	TCRBD01-01*01	TCRBJ01-04*01
CTGACTGTGAGCAACATGAGCCCTGAAGACAGCAGCATATATCTCTGCAGCGTTAATAGGGGGGGCACTGAAGCTTTCTTTGGACAA	CSVNRGGTEAFF	7	8.04496e-05	TCRBV29-01*01	TCRBD02-01*01	TCRBJ01-01*01
CTGACTGTGAGCAACATGAGCCCTGAAGACAGCAGCATATATCTCTGCAGCGTCGGACAGGGGGTAAAGACCCAGTACTTCGGGCCA	CSVGQGVKTQYF	7	8.04496e-05	TCRBV29-01*01	TCRBD01-01*01	TCRBJ02-05*01
GTGAGCAACATGAGCCCTGAAGACAGCAGCATATATCTCTGCAGCGTCCAGCCCGGGACAGTCTCCTACGAGCAGTACTTCGGGCCG	CSVQPGTVSYEQYF	7	8.04496e-05	TCRBV29-01*01	TCRBD01-01*01	TCRBJ02-07*01
ACTGTGAGCAACATGAGCCCTGAAGACAGCAGCATATATCTCTGCAGCGTCGGGGGACAGGCTAATGAAAAACTGTTTTTTGGCAGT	CSVGGQANEKLFF	7	8.04496e-05	TCRBV29-01*01	TCRBD01-01*01	TCRBJ01-04*01
CTGACTGTGAGCAACATGAGCCCTGAAGACAGCAGCATATATCTCTGCAGCGTTGAACAGTTACAAGAGACCCAGTACTTCGGGCCA	CSVEQLQETQYF	7	8.04496e-05	TCRBV29-01*01	TCRBD01-01*01	TCRBJ02-05*01
CAGCGCACACAGCAGGAGGACTCGGCCGTGTATCTCTGTGCCAGCAGGTCAGCCACCGGGACAGGGTATCCCCTCCACTTTGGGAAC	CASRSATGTGYPLHF	7	8.04496e-05	TCRBV07-02*01	TCRBD01-01*01	TCRBJ01-06*01
ATCCAGCGCACACAGCAGGAGGACTCGGCCGTGTATCTCTGTGCCAGCAGCTTGACAGGGGTGGGTGAAAAACTGTTTTTTGGCAGT	CASSLTGVGEKLFF	7	8.04496e-05	TCRBV07-02*01	TCRBD01-01*01	TCRBJ01-04*01
CCTGCAAAGCTTGAGGACTCGGCCGTGTATCTCTGTGCCAGCAGCTTAGATAGGAGACAGGGGGGATCACCCCTCCACTTTGGGAAC	CASSLDRRQGGSPLHF	7	8.04496e-05	TCRBV11-02*02	TCRBD01-01*01	TCRBJ01-06*01
CAGCCTGCAAAGCTTGAGGACTCGGCCGTGTATCTCTGTGCCAGCAGCTTCGCGGGACTAGCGGGGGTCGAGCAGTACTTCGGGCCG	CASSFAGLAGVEQYF	7	8.04496e-05	TCRBV11-02*02	TCRBD02-01*01	TCRBJ02-07*01
GAATCCTTTCCTCTCACTGTGACATCGGCCCAAAAGAACCCGACAGCTTTCTATCTCTGTGCCAGTAGTATCACCTTGTGGGGGCCG	CASSITLW	7	8.04496e-05	TCRBV19-01		TCRBJ02-07*01
GTGACATCGGCCCAAAAGAACCCGACAGCTTTCTATCTCTGTGCCAGTAGTATAGGACAGGGCCTCAATGAGCAGTTCTTCGGGCCA	CASSIGQGLNEQFF	7	8.04496e-05	TCRBV19-01	TCRBD01-01*01	TCRBJ02-01*01
GCAAAGCTTGAGGACTCGGCCGTGTATCTCTGTGCCAGCAGCTACGTCCCGGGACAGGGAGGGGGTGGAGAGCAGTACTTCGGGCCG	CASSYVPGQGGGGEQYF	7	8.04496e-05	TCRBV11-02*02	TCRBD01-01*01	TCRBJ02-07*01
AAGATCCAGCCTGCAAAGCTTGAGGACTCGGCCGTGTATCTCTGTGCCAGCCGCCCTAGCGGGGGCTCCCAGGAGTACTTCGGGCCG	CASRPSGGSQEYF	7	8.04496e-05	TCRBV11-02*02	TCRBD02-01*01	TCRBJ02-07*01
CCTGCAGAGCTTGGGGACTCGGCCGTGTATCTCTGTGCCAGCAGCCGACGGAGTGTCAGACCTAACTATGGCTACACCTTCGGTTCG	CASSRRSVRPNYGYTF	7	8.04496e-05	TCRBV11-03*01	TCRBD02-01*02	TCRBJ01-02*01
GTGACATCGGCCCAAAAGAACCCGACAGCTTTCTATCTCTGTGCCAGTAACCCCAAGGGCTGGAATCAGCCCCAGCATTTTGGTGAT	CASNPKGWNQPQHF	7	8.04496e-05	TCRBV19-01		TCRBJ01-05*01
CCTCTCACTGTGACATCGGCCCAAAAGAACCCGACAGCTTTCTATCTCTGTGCCACCACCCTGACCGGGGAGCTGTTTTTTGGAGAA	CATTLTGELFF	7	8.04496e-05	TCRBV19-01		TCRBJ02-02*01
ACATCGGCCCAAAAGAACCCGACAGCTTTCTATCTCTGTGCCAGTAGTATAGGTGGCCCTAGAGCAGATACGCAGTATTTTGGCCCA	CASSIGGPRADTQYF	7	8.04496e-05	TCRBV19-01	TCRBD02-01	TCRBJ02-03*01
ACATCGGCCCAAAAGAACCCGACAGCTTTCTATCTCTGTGCCAGTCGTTATAGCGGGGGCCACGACAATGAGCAGTTCTTCGGGCCA	CASRYSGGHDNEQFF	7	8.04496e-05	TCRBV19-01	TCRBD02-01*01	TCRBJ02-01*01
CTCACTGTGACATCGGCCCAAAAGAACCCGACAGCTTTCTATCTCTGTGCCAGTAGTACTGGTTTTGTTGGCTACACCTTCGGTTCG	CASSTGFVGYTF	7	8.04496e-05	TCRBV19-01		TCRBJ01-02*01
ACATCGGCCCAAAAGAACCCGACAGCTTTCTATCTCTGTGCCAGTAGTATTTGGGGGGCAGGGCAACAGCCCCAGCATTTTGGTGAT	CASSIWGAGQQPQHF	7	8.04496e-05	TCRBV19-01		TCRBJ01-05*01
GTGACATCGGCCCAAAAGAACCCGACAGCTTTCTATCTCTGTGCCAGTAGCCCGGTGACAGGGTCCGGGGAGCTGTTTTTTGGAGAA	CASSPVTGSGELFF	7	8.04496e-05	TCRBV19-01	TCRBD01-01*01	TCRBJ02-02*01
ACTGTGACATCGGCCCAAAAGAACCCGACAGCTTTCTATCTCTGTGCCAGTATCAGGGAGGCGAACACTGAAGCTTTCTTTGGACAA	CASIREANTEAFF	7	8.04496e-05	TCRBV19-01	TCRBD02-01*02	TCRBJ01-01*01
TTAAATCTTCACATCAATTCCCTGGAGCTTGGTGACTCTGCTGTGTATTTCTGTGCCAGCAGCAGCTACGAGCAGTACTTCGGGCCG	CASSSYEQYF	7	8.04496e-05	TCRBV03		TCRBJ02-07*01
AGTGCCCATCCTGAAGACAGCAGCTTCTACATCTGCAGTGCTAGAGATCCCGACAGGGGAGACTCCTCACCCCTCCACTTTGGGAAC	CSARDPDRGDSSPLHF	7	8.04496e-05	TCRBV20	TCRBD01-01*01	TCRBJ01-06*01
AGTGCCCATCCTGAAGACAGCAGCTTCTACATCTGCAGTGCTAGAGATGCGGTACAGGGGGGGACCGGGGAGCTGTTTTTTGGAGAA	CSARDAVQGGTGELFF	7	8.04496e-05	TCRBV20	TCRBD01-01*01	TCRBJ02-02*01
GGTGACTCTGCTGTGTATTTCTGTGCCAGCAGCTCCTCCTATCCAGGACAGGGAGGACTGTCCGGAAACACCATATATTTTGGAGAG	CASSSSYPGQGGLSGNTIYF	7	8.04496e-05	TCRBV03	TCRBD01-01*01	TCRBJ01-03*01
AAGATCCAGCCCTCAGAACCCAGGGACTCAGCTGTGTACTTCTGTGCCAGCAGTTATATCCCGAACACTGAAGCTTTCTTTGGACAA	CASSYIPNTEAFF	7	8.04496e-05	TCRBV12	TCRBD02-01	TCRBJ01-01*01
AATTCCCTGGAGCTTGGTGACTCTGCTGTGTATTTCTGTGCCAGCAGCCCGACCGGGACTAGCACAGATACGCAGTATTTTGGCCCA	CASSPTGTSTDTQYF	7	8.04496e-05	TCRBV03	TCRBD02-01	TCRBJ02-03*01
CATCCTGAAGACAGCAGCTTCTACATCTGCAGTGCTAGAGACCCCCTAGCGGGGGCGCCTCTCGGGGAGACCCAGTACTTCGGGCCA	CSARDPLAGAPLGETQYF	7	8.04496e-05	TCRBV20	TCRBD02-01*01	TCRBJ02-05*01
AGTGCCCATCCTGAAGACAGCAGCTTCTACATCTGCAGTGCTAGAGATCGGGACGGGGGTTCCCAAGAGACCCAGTACTTCGGGCCA	CSARDRDGGSQETQYF	7	8.04496e-05	TCRBV20	TCRBD02-01*01	TCRBJ02-05*01
AGTGCCCATCCTGAAGACAGCAGCTTCTACATCTGCAGTGCCATACTCGGGACAGGGGGCCGCGGGGAGACCCAGTACTTCGGGCCA	CSAILGTGGRGETQYF	7	8.04496e-05	TCRBV20	TCRBD01-01*01	TCRBJ02-05*01
CTGACAGTGACCAGTGCCCATCCTGAAGACAGCAGCTTCTACATCTGCAGTGCTAGAGTACCCGGCAATGAGCAGTTCTTCGGGCCA	CSARVPGNEQFF	7	8.04496e-05	TCRBV20	TCRBD02-01	TCRBJ02-01*01
GAGTCGGCTGCTCCCTCCCAAACATCTGTGTACTTCTGTGCCAGCTTTAATACCCGACCCGGCAAGGGTACGCAGTATTTTGGCCCA	CASFNTRPGKGTQYF	7	8.04496e-05	TCRBV06		TCRBJ02-03*01
CTGGAGCTTGGTGACTCTGCTGTGTATTTCTGTGCCAGCAGCCAACTTAGCGGGGGCGGGACCAAAAACATTCAGTACTTCGGCGCC	CASSQLSGGGTKNIQYF	7	8.04496e-05	TCRBV03	TCRBD02-01*01	TCRBJ02-04*01
CAGCCCTCAGAACCCAGGGACTCAGCTGTGTACTTCTGTGCCAGCAGTTTATGGGCCAGCGGGGGGAGTGAGCAGTTCTTCGGGCCA	CASSLWASGGSEQFF	7	8.04496e-05	TCRBV12	TCRBD02-01*01	TCRBJ02-01*01
TCCCTGGAGCTTGGTGACTCTGCTGTGTATTTCTGTGCCAGCAGCCGATTGGGGGGGCAAAATTCCGGCGAGCAGTACTTCGGGCCG	CASSRLGGQNSGEQYF	7	8.04496e-05	TCRBV03	TCRBD02-01*01	TCRBJ02-07*01
ACCAGTGCCCATCCTGAAGACAGCAGCTTCTACATCTGCAGTGCTAGAGATCCCAGGGGCTCTGGAAACACCATATATTTTGGAGAG	CSARDPRGSGNTIYF	7	8.04496e-05	TCRBV20	TCRBD01-01*01	TCRBJ01-03*01
CACATCAATTCCCTGGAGCTTGGTGACTCTGCTGTGTATTTCTGTGCCAGCAGCGATTCGATCCTCTATGGCTACACCTTCGGTTCG	CASSDSILYGYTF	7	8.04496e-05	TCRBV03		TCRBJ01-02*01
GCCCATCCTGAAGACAGCAGCTTCTACATCTGCAGTGCTAGAGATACAGGGACTCCCAATTCCTACAATGAGCAGTTCTTCGGGCCA	CSARDTGTPNSYNEQFF	7	8.04496e-05	TCRBV20		TCRBJ02-01*01
AAGATCCAGCCCTCAGAACCCAGGGACTCAGCTGTGTACTTCTGTGCCACTCCCGGAGCCCGGCATTCACCCCTCCACTTTGGGAAC	CATPGARHSPLHF	7	8.04496e-05	TCRBV12	TCRBD02-01*02	TCRBJ01-06*01
TCCCTAGAGTCTGCCATCCCCAACCAGACAGCTCTTTACTTCTGTGCCACCAGTGAGGGGGGAAATCAGCCCCAGCATTTTGGTGAT	CATSEGGNQPQHF	7	8.04496e-05	TCRBV24	TCRBD02-01*01	TCRBJ01-05*01
ACCAGTGCCCATCCTGAAGACAGCAGCTTCTACATCTGCAGTGCTACCCCCCGGACAGGGATCAATCAGCCCCAGCATTTTGGTGAT	CSATPRTGINQPQHF	7	8.04496e-05	TCRBV20	TCRBD01-01*01	TCRBJ01-05*01
GTGACCAGTGCCCATCCTGAAGACAGCAGCTTCTACATCTGCAGTGCAATAGTGGGACTCCGAGCCACTGAAGCTTTCTTTGGACAA	CSAIVGLRATEAFF	7	8.04496e-05	TCRBV20	TCRBD02-01	TCRBJ01-01*01
GTGACCAGTGCCCATCCTGAAGACAGCAGCTTCTACATCTGCAGTGCTAGAGGTGGGGGGTCCTACAATGAGCAGTTCTTCGGGCCA	CSARGGGSYNEQFF	7	8.04496e-05	TCRBV20	TCRBD02-01*01	TCRBJ02-01*01
AGTGCCCATCCTGAAGACAGCAGCTTCTACATCTGCAGTGCTAGAAGGAAGGGGTACCAAACCTACAATGAGCAGTTCTTCGGGCCA	CSARRKGYQTYNEQFF	7	8.04496e-05	TCRBV20	TCRBD01-01*01	TCRBJ02-01*01
GTGACCAGTGCCCATCCTGAAGACAGCAGCTTCTACATCTGCAGTGCTAGAGATTCTAGCGGGGTTTGGACGCAGTATTTTGGCCCA	CSARDSSGVWTQYF	7	8.04496e-05	TCRBV20	TCRBD02-01*01	TCRBJ02-03*01
AAGATCCAGCCCTCAGAACCCAGGGACTCAGCTGTGTACTTCTGTGCCAGCGGGATGCAGGGGAGGTTTGGCTACACCTTCGGTTCG	CASGMQGRFGYTF	7	8.04496e-05	TCRBV12		TCRBJ01-02*01
GCTCCCTCCCAGACATCTGTGTACTTCTGTGCCAGCAGTTACATCAACCCAGGGGGCAGGGCTGGAAACACCATATATTTTGGAGAG	CASSYINPGGRAGNTIYF	7	8.04496e-05	TCRBV06	TCRBD01-01*01	TCRBJ01-03*01
ACAGTGACCAGTGCCCATCCTGAAGACAGCAGCTTCTACATCTGCAGTGCTAAGTCCCTAAAGGGCACTGAAGCTTTCTTTGGACAA	CSAKSLKGTEAFF	7	8.04496e-05	TCRBV20		TCRBJ01-01*01
GCTGCTCCCTCCCAGACATCTGTGTACTTCTGTGCCAGCAGCCCACAGACTCTCGGACAGGGGGCAGGCGAGCAGTACTTCGGGCCG	CASSPQTLGQGAGEQYF	7	8.04496e-05	TCRBV06	TCRBD01-01*01	TCRBJ02-07*01
CTACACACCCTGCAGCCAGAAGACTCGGCCCTGTATCTCTGTGCCAGCTCTAGCGGGGGGGCCGGGGAGACCCAGTACTTCGGGCCA	CASSSGGAGETQYF	6	6.89568e-05	TCRBV04-02*01	TCRBD02-01*01	TCRBJ02-05*01
CTACACACCCTGCAGCCAGAAGACTCGGCCCTGTATCTCTGTGCCAGCAGCCAAGATGGCAGCACAGATACGCAGTATTTTGGCCCA	CASSQDGSTDTQYF	6	6.89568e-05	TCRBV04-02*01	TCRBD01-01*01	TCRBJ02-03*01
CTGCAGCCAGAAGACTCGGCCCTGTATCTCTGTGCCAGCAGCCAAGGTCAGGTGGGCGGCCCTTACAATGAGCAGTTCTTCGGGCCA	CASSQGQVGGPYNEQFF	6	6.89568e-05	TCRBV04-02*01		TCRBJ02-01*01
ACGATCCAGCGCACAGAGCAGCGGGACTCGGCCATGTATCGCTGTGCCAGCAGCTTAGAACACGACTATGGCTACACCTTCGGTTCG	CASSLEHDYGYTF	6	6.89568e-05	TCRBV07-06*01	TCRBD01-01*01	TCRBJ01-02*01
CGCTCACCAGGCCTGGGGGACGCAGCCATGTACCTGTGTGCCACCAGCACACGGACTAGGAACACCGGGGAGCTGTTTTTTGGAGAA	CATSTRTRNTGELFF	6	6.89568e-05	TCRBV15-01*01	TCRBD02-01	TCRBJ02-02*01
CACACCCTGCAGCCAGAAGACTCGGCCCTGTATCTCTGCGCCAGCAGCCAATTCACAGGGGGCCGCAATGAGCAGTTCTTCGGGCCA	CASSQFTGGRNEQFF	6	6.89568e-05	TCRBV04-03*01	TCRBD01-01*01	TCRBJ02-01*01
CTACACACCCTGCAGCCAGAAGACTCGGCCCTGTATCTCTGCGCCAGCAGCCAGTTCGGGGGGGCTTACGAGCAGTACTTCGGGCCG	CASSQFGGAYEQYF	6	6.89568e-05	TCRBV04-03*01	TCRBD02-01*01	TCRBJ02-07*01
CACACCCTGCAGCCAGAAGACTCGGCCCTGTATCTCTGCGCCGGAACTGAACCAGGGTTGGAGAGGACTGAAGCTTTCTTTGGACAA	CAGTEPGLERTEAFF	6	6.89568e-05	TCRBV04-03*01	TCRBD01-01*01	TCRBJ01-01*01
AACGCCTTGTTGCTGGGGGACTCGGCCCTGTATCTCTGTGCCAGCACCGTCGGACAGGGGATTTCCTACGAGCAGTACTTCGGGCCG	CASTVGQGISYEQYF	6	6.89568e-05	TCRBV05-05*01	TCRBD01-01*01	TCRBJ02-07*01
CTGAGCTCTCTGGAGCTGGGGGACTCAGCTTTGTATTTCTGTGCCAGCAGCGTAACGGGACAGCGTGAAAAACTGTTTTTTGGCAGT	CASSVTGQREKLFF	6	6.89568e-05	TCRBV09-01	TCRBD01-01*01	TCRBJ01-04*01
TCTCTGGAGCTGGGGGACTCAGCTTTGTATTTCTGTGCCAGCAGCCCAGGCAGAGGTTTTACCTACAATGAGCAGTTCTTCGGGCCA	CASSPGRGFTYNEQFF	6	6.89568e-05	TCRBV09-01		TCRBJ02-01*01
AGCTCTCTGGAGCTGGGGGACTCAGCTTTGTATTTCTGTGCCAGCAGCACATCCGGGACAGATTACAATGAGCAGTTCTTCGGGCCA	CASSTSGTDYNEQFF	6	6.89568e-05	TCRBV09-01	TCRBD01-01*01	TCRBJ02-01*01
CTGGAGTCGGCTGCTCCCTCCCAGACATCTGTGTACTTCTGTGCCAGTGAGCGTGAAGGGGAGGCCACTGAAGCTTTCTTTGGACAA	CASEREGEATEAFF	6	6.89568e-05	TCRBV06-01*01	TCRBD02-01*02	TCRBJ01-01*01
GAGTCGGCTGCTCCCTCCCAGACATCTGTGTACTTCTGTGCCAGCAGTCTTGGACAGGGGAACACCGGGGAGCTGTTTTTTGGAGAA	CASSLGQGNTGELFF	6	6.89568e-05	TCRBV06-01*01	TCRBD01-01*01	TCRBJ02-02*01
TCGCTCAGGCTGGAGTCGGCTGCTCCCTCCCAGACATCTGTGTACTTCTGTGCCGCCGACAGGGTCTATGGCTACACCTTCGGTTCG	CAADRVYGYTF	6	6.89568e-05	TCRBV06-01*01	TCRBD01-01*01	TCRBJ01-02*01
GCCTTGGAGCTGGAGGACTCGGCCCTGTATCTCTGTGCCAGCAGCTCCTCACTTGGATCTAGCACAGATACGCAGTATTTTGGCCCA	CASSSSLGSSTDTQYF	6	6.89568e-05	TCRBV05-08*01		TCRBJ02-03*01
GTGAACGCCTTGTTGCTGGGGGACTCGGCCCTCTATCTCTGTGCCAGCAGCTTGTTACAGGGAGGGTCACCCCTCCACTTTGGGAAC	CASSLLQGGSPLHF	6	6.89568e-05	TCRBV05-06*01	TCRBD02-01*02	TCRBJ01-06*01
GCCCTGCAGCCAGAAGACTCAGCCCTGTATCTCTGCGCCAGCAGCCAAGCTTCCTGGGGGGCTGGCTATGGCTACACCTTCGGTTCG	CASSQASWGAGYGYTF	6	6.89568e-05	TCRBV04-01*01		TCRBJ01-02*01
CTGCAGCCAGAAGACTCAGCCCTGTATCTCTGCGCCAGCAGCCAAGATGCGAGACAGGGGGTACCCTACGAGCAGTACTTCGGGCCG	CASSQDARQGVPYEQYF	6	6.89568e-05	TCRBV04-01*01	TCRBD01-01*01	TCRBJ02-07*01
CACCTACACGCCCTGCAGCCAGAAGACTCAGCCCTGTATCTCTGCGCCAGCAGCTCCGGGACGGACTACGAGCAGTACTTCGGGCCG	CASSSGTDYEQYF	6	6.89568e-05	TCRBV04-01*01		TCRBJ02-07*01
CTTCACCTACACGCCCTGCAGCCAGAAGACTCAGCCCTGTATCTCTGCGCCAGCAGCCAAATTGGCCAACCCCAGCATTTTGGTGAT	CASSQIGQPQHF	6	6.89568e-05	TCRBV04-01*01	TCRBD01-01*01	TCRBJ01-05*01
CTACACGCCCTGCAGCCAGAAGACTCAGCCCTGTATCTCTGCGCCAGCAGCCATGTTACAGCAAACACTGAAGCTTTCTTTGGACAA	CASSHVTANTEAFF	6	6.89568e-05	TCRBV04-01*01	TCRBD01-01*01	TCRBJ01-01*01
CAGCCAGAAGACTCAGCCCTGTATCTCTGCGCCAGCAGCCAAGGAGGGGGGCAGGGGTTAACGAACACTGAAGCTTTCTTTGGACAA	CASSQGGGQGLTNTEAFF	6	6.89568e-05	TCRBV04-01*01		TCRBJ01-01*01
AGGCTGGAGTTGGCTGCTCCCTCCCAGACATCTGTGTACTTCTGTGCCAGCGGGGGACAGGACTACAATGAGCAGTTCTTCGGGCCA	CASGGQDYNEQFF	6	6.89568e-05	TCRBV06-06	TCRBD01-01*01	TCRBJ02-01*01
ATCCGGTCCACAAAGCTGGAGGACTCAGCCATGTACTTCTGTGCCAGCAGTGATGAACAGAGGTCCTACGAGCAGTACTTCGGGCCG	CASSDEQRSYEQYF	6	6.89568e-05	TCRBV02-01*01		TCRBJ02-07*01
AGCTCTCTGGAGCTGGGGGACTCAGCTTTGTATTTCTGTGCCAGCAGCGTTGGAGCGGGGGGGAGTAATGAGCAGTTCTTCGGGCCA	CASSVGAGGSNEQFF	6	6.89568e-05	TCRBV09-01	TCRBD02-01*01	TCRBJ02-01*01
CTGAGCTCTCTGGAGCTGGGGGACTCAGCTTTGTATTTCTGTGCCAGCAGCGCTCTTCGTAGCGGGGATACGCAGTATTTTGGCCCA	CASSALRSGDTQYF	6	6.89568e-05	TCRBV09-01	TCRBD02-01	TCRBJ02-03*01
CTGAGCTCTCTGGAGCTGGGGGACTCAGCTTTGTATTTCTGTGCCAGCAGCGTAGGAGGTAGCGGCAATGAGCAGTTCTTCGGGCCA	CASSVGGSGNEQFF	6	6.89568e-05	TCRBV09-01	TCRBD02-01	TCRBJ02-01*01
CTGAGCTCTCTGGAGCTGGGGGACTCAGCTTTGTATTTCTGTGCCAGCAGCGTAGGGACTCTCCAAGAGACCCAGTACTTCGGGCCA	CASSVGTLQETQYF	6	6.89568e-05	TCRBV09-01	TCRBD02-01	TCRBJ02-05*01
CTGAGCTCTCTGGAGCTGGGGGACTCAGCTTTGTATTTCTGTGCCAGCAGCGTCAGGGAGAGGCGTGAAAAACTGTTTTTTGGCAGT	CASSVRERREKLFF	6	6.89568e-05	TCRBV09-01		TCRBJ01-04*01
TCTCTGGAGCTGGGGGACTCAGCTTTGTATTTCTGTGCCAGCAGCGTAGGGTCTCCCGGTGGGGGAAACACCATATATTTTGGAGAG	CASSVGSPGGGNTIYF	6	6.89568e-05	TCRBV09-01		TCRBJ01-03*01
AGCTCTCTGGAGCTGGGGGACTCAGCTTTGTATTTCTGTGCCAGCAGCGTAACCACAGGGACAAATGAAAAACTGTTTTTTGGCAGT	CASSVTTGTNEKLFF	6	6.89568e-05	TCRBV09-01	TCRBD01-01*01	TCRBJ01-04*01
ATCCAGCCTGCAGAGCTTGGGGACTCGGCCATGTATCTCTGTGCCAGCAGCTTAACCGCCTACCCAGGGCAAGCTTTCTTTGGACAA	CASSLTAYPGQAFF	6	6.89568e-05	TCRBV11-01*01	TCRBD01-01*01	TCRBJ01-01*01
CAGCCTGCAGAGCTTGGGGACTCGGCCATGTATCTCTGTGCCAGCAGCTTAGCGCTTAGGCCCGGCACTGAAGCTTTCTTTGGACAA	CASSLALRPGTEAFF	6	6.89568e-05	TCRBV11-01*01		TCRBJ01-01*01
GAGCTTGGGGACTCGGCCATGTATCTCTGTGCCAGCAGCTCCCCTAGGGGGGGGGCTAGCGGTTACAATGAGCAGTTCTTCGGGCCA	CASSSPRGGASGYNEQFF	6	6.89568e-05	TCRBV11-01*01	TCRBD02-01	TCRBJ02-01*01
AACGCCTTGGAGCTGGACGACTCGGCCCTGTATCTCTGTGCCAGCAGGAACGGCGGGACGGCACCCTACGAGCAGTACTTCGGGCCG	CASRNGGTAPYEQYF	6	6.89568e-05	TCRBV05-04*01	TCRBD02-01*02	TCRBJ02-07*01
AACGCCTTGGAGCTGGACGACTCGGCCCTGTATCTCTGTGCCAGCAGCTTGGCAGGGGACTCCTACAATGAGCAGTTCTTCGGGCCA	CASSLAGDSYNEQFF	6	6.89568e-05	TCRBV05-04*01	TCRBD01-01*01	TCRBJ02-01*01
TTGGAGCTGGACGACTCGGCCCTGTATCTCTGTGCCAGCAGCCAACAAGCAGGACAGGCCTATAATTCACCCCTCCACTTTGGGAAC	CASSQQAGQAYNSPLHF	6	6.89568e-05	TCRBV05-04*01	TCRBD01-01*01	TCRBJ01-06*01
GCCTTGGAGCTGGACGACTCGGCCCTGTATCTCTGTGCCAGCAGCTGGGGGGGGAGACAGCATCGGGACACCATATATTTTGGAGAG	CASSWGGRQHRDTIYF	6	6.89568e-05	TCRBV05-04*01	TCRBD02-01*01	TCRBJ01-03*01
AATGTGAACGCCTTGGAGCTGGACGACTCGGCCCTGTATCTCTGTGCCAGCAGCTCAAGACTGGGCTACGAGCAGTACTTCGGGCCG	CASSSRLGYEQYF	6	6.89568e-05	TCRBV05-04*01	TCRBD02-01	TCRBJ02-07*01
GAGTCGGCTGCTCCCTCCCAGACATCTGTGTACTTCTGTGCCAGCAGTGCCACAGGGGTCCATTCCTACGAGCAGTACTTCGGGCCG	CASSATGVHSYEQYF	6	6.89568e-05	TCRBV06-01*01	TCRBD01-01*01	TCRBJ02-07*01
CTGGAGTCGGCTGCTCCCTCCCAGACATCTGTGTACTTCTGTGCCAGCAGCACAGGGATTGGTAACTATGGCTACACCTTCGGTTCG	CASSTGIGNYGYTF	6	6.89568e-05	TCRBV06-01*01	TCRBD01-01*01	TCRBJ01-02*01
AAGATCCAGCGCACAGAGCGGGGGGACTCAGCCGTGTATCTCTGTGCCAGCAGCGCTACAGGGAATTCACCCCTCCACTTTGGGAAC	CASSATGNSPLHF	6	6.89568e-05	TCRBV07-03*01	TCRBD01-01*01	TCRBJ01-06*01
GAGTCTGCTGCCTCCTCCCAGACATCTGTATATTTCTGCGCCAGCAGTGAGTACAGGGGGCTCGCCGGGGAGCTGTTTTTTGGAGAA	CASSEYRGLAGELFF	6	6.89568e-05	TCRBV10-01	TCRBD01-01*01	TCRBJ02-02*01
GAGTCTGCTGCCTCCTCCCAGACATCTGTATATTTCTGCGCCAGCAGTGAGTCGGCGCGGTGGACAGATACGCAGTATTTTGGCCCA	CASSESARWTDTQYF	6	6.89568e-05	TCRBV10-01	TCRBD02-01	TCRBJ02-03*01
CTGCTGTCGGCTGCTCCCTCCCAGACATCTGTGTACTTCTGTGCCAGCAGTAGCTCGACAGGGGCATATGGCTACACCTTCGGTTCG	CASSSSTGAYGYTF	6	6.89568e-05	TCRBV06-05*01	TCRBD01-01*01	TCRBJ01-02*01
AGGCTGGAGTTGGCTGCTCCCTCCCAGACATCTGTGTACTTCTGTGCCAGCAGACACAGGGACTCCTACGAGCAGTACTTCGGGCCG	CASRHRDSYEQYF	6	6.89568e-05	TCRBV06-06	TCRBD01-01*01	TCRBJ02-07*01
GAGTTGGCTGCTCCCTCCCAGACATCTGTGTACTTCTGTGCCAGCAGTTACGTTCAGGGGGTTTCCTACGAGCAGTACTTCGGGCCG	CASSYVQGVSYEQYF	6	6.89568e-05	TCRBV06-06	TCRBD01-01*01	TCRBJ02-07*01
CTGGAGTTGGCTGCTCCCTCCCAGACATCTGTGTACTTCTGTGCCGGGCGGAGTATCACTTCCACCGGGGAGCTGTTTTTTGGAGAA	CAGRSITSTGELFF	6	6.89568e-05	TCRBV06-06		TCRBJ02-02*01
AAGATCCGGTCCACAAAGCTGGAGGACTCAGCCATGTACTTCTGTGCCAGCAGTCAGGGGGAGATGACTGAAGCTTTCTTTGGACAA	CASSQGEMTEAFF	6	6.89568e-05	TCRBV02-01*01	TCRBD01-01*01	TCRBJ01-01*01
CGGTCCACAAAGCTGGAGGACTCAGCCATGTACTTCTGTGCCAGCAGTGAGGATGCAGGGCGCCAAGAGACCCAGTACTTCGGGCCA	CASSEDAGRQETQYF	6	6.89568e-05	TCRBV02-01*01	TCRBD01-01*01	TCRBJ02-05*01
CGGTCCACAAAGCTGGAGGACTCAGCCATGTACTTCTGTGCCAGCAGTGACCAGGGGAGAAAGATTGCTCAAGCTTTCTTTGGACAA	CASSDQGRKIAQAFF	6	6.89568e-05	TCRBV02-01*01	TCRBD01-01*01	TCRBJ01-01*01
CTGAAGATCCGGTCCACAAAGCTGGAGGACTCAGCCATGTACTTCTGTGCCAGCAGTGAGGAGGTTCAGCCCCAGCATTTTGGTGAT	CASSEEVQPQHF	6	6.89568e-05	TCRBV02-01*01	TCRBD02-01*02	TCRBJ01-05*01
AAGATCCGGTCCACAAAGCTGGAGGACTCAGCCATGTACTTCTGTGCCAGCAGTAGTCAGGGGAACACTGAAGCTTTCTTTGGACAA	CASSSQGNTEAFF	6	6.89568e-05	TCRBV02-01*01	TCRBD01-01*01	TCRBJ01-01*01
CGGTCCACAAAGCTGGAGGACTCAGCCATGTACTTCTGTGCCAGCAGTGTATGGCGGGGGAACACAGATACGCAGTATTTTGGCCCA	CASSVWRGNTDTQYF	6	6.89568e-05	TCRBV02-01*01	TCRBD02-01*01	TCRBJ02-03*01
AAGGTGCAGCCTGCAGAACTGGAGGATTCTGGAGTTTATTTCTGTGCCAGCAGCCAAGGAGGGGTCACTGAAGCTTTCTTTGGACAA	CASSQGGVTEAFF	6	6.89568e-05	TCRBV14-01*01		TCRBJ01-01*01
AAGGTGCAGCCTGCAGAACTGGAGGATTCTGGAGTTTATTTCTGTGCCAGCAGCCCCTGGGGGTTTTGGGGCTACACCTTCGGTTCG	CASSPWGFWGYTF	6	6.89568e-05	TCRBV14-01*01		TCRBJ01-02*01
GCAGAACTGGAGGATTCTGGAGTTTATTTCTGTGCCAGCAGCCACATCAGGACGGTTAGTAAGGTCTATGGCTACACCTTCGGTTCG	CASSHIRTVSKVYGYTF	6	6.89568e-05	TCRBV14-01*01		TCRBJ01-02*01
GTGCAGCCTGCAGAACTGGAGGATTCTGGAGTTTATTTCTGTGCCAGCAGCCAAGGTGTAAGATCCGTGACCCAGTACTTCGGGCCA	CASSQGVRSVTQYF	6	6.89568e-05	TCRBV14-01*01		TCRBJ02-05*01
GTGAACGCCTTGGAGCTGGACGACTCGGCCCTGTATCTCTGTGCCAGCAGCGAGCCGACGGGCACAGATACGCAGTATTTTGGCCCA	CASSEPTGTDTQYF	6	6.89568e-05	TCRBV05-04*01		TCRBJ02-03*01
CTCAGGCTGCTGTCGGCTGCTCCCTCCCAGACATCTGTGTACTTCTGTGCCAGCCGGGACAGGGTATACGAGCAGTACTTCGGGCCG	CASRDRVYEQYF	6	6.89568e-05	TCRBV06-05*01	TCRBD01-01*01	TCRBJ02-07*01
AGGCTGCTGTCGGCTGCTCCCTCCCAGACATCTGTGTACTTCTGTGCCAGCAGTTCGGACAGGCGTGGGCCCCTCCACTTTGGGAAC	CASSSDRRGPLHF	6	6.89568e-05	TCRBV06-05*01	TCRBD01-01*01	TCRBJ01-06*01
GAGATCCAGCGCACAGAGCAGGGGGACTCGGCCATGTATCTCTGTGCCAGCAGCTTGAACAGGGACCGAGGCTACACCTTCGGTTCG	CASSLNRDRGYTF	6	6.89568e-05	TCRBV07-09	TCRBD01-01*01	TCRBJ01-02*01
TCCACAAAGCTGGAGGACTCAGCCATGTACTTCTGTGCCAGCAGTGAGGGGAGGGCCAACTCTGGAAACACCATATATTTTGGAGAG	CASSEGRANSGNTIYF	6	6.89568e-05	TCRBV02-01*01	TCRBD02-01*02	TCRBJ01-03*01
CGGTCCACAAAGCTGGAGGACTCAGCCATGTACTTCTGTGCCAGCGGGGACAAGAGCTCTGGGGCCAACGTCCTGACTTTCGGGGCC	CASGDKSSGANVLTF	6	6.89568e-05	TCRBV02-01*01	TCRBD01-01*01	TCRBJ02-06*01
ACTCTGAAGATCCGGTCCACAAAGCTGGAGGACTCAGCCATGTACTTCTGTGCCAGCACTGCGTGGGAACGAGCTTTCTTTGGACAA	CASTAWERAFF	6	6.89568e-05	TCRBV02-01*01		TCRBJ01-01*01
AAGATCCGGTCCACAAAGCTGGAGGACTCAGCCATGTACTTCTGTGCCAGCAGTGAAGCGTTTCTCTACGAGCAGTACTTCGGGCCG	CASSEAFLYEQYF	6	6.89568e-05	TCRBV02-01*01	TCRBD02-01	TCRBJ02-07*01
AAGATCCGGTCCACAAAGCTGGAGGACTCAGCCATGTACTTCTGTGCCAGCAGGATACAGGGATACTATGGCTACACCTTCGGTTCG	CASRIQGYYGYTF	6	6.89568e-05	TCRBV02-01*01	TCRBD01-01*01	TCRBJ01-02*01
ATCCGGTCCACAAAGCTGGAGGACTCAGCCATGTACTTCTGTGCCAGCAGTGTTCAGCTTAGCAATCAGCCCCAGCATTTTGGTGAT	CASSVQLSNQPQHF	6	6.89568e-05	TCRBV02-01*01		TCRBJ01-05*01
TTGGCGTCTGCTGTACCCTCTCAGACATCTGTGTACTTCTGTGCCAGCAGTGATGGCGGGGGCGCAGATACGCAGTATTTTGGCCCA	CASSDGGGADTQYF	6	6.89568e-05	TCRBV06-04	TCRBD02-01*01	TCRBJ02-03*01
GTACCCTCTCAGACATCTGTGTACTTCTGTGCCAGCAGTGACACGGGACTAGCGGGGGAAAACACCGGGGAGCTGTTTTTTGGAGAA	CASSDTGLAGENTGELFF	6	6.89568e-05	TCRBV06-04	TCRBD02-01*01	TCRBJ02-02*01
ACCTTGGAGCTGGGGGACTCGGCCCTTTATCTTTGCGCCAGCAGTCCCGGGACGGGCCCAACTAATGAAAAACTGTTTTTTGGCAGT	CASSPGTGPTNEKLFF	6	6.89568e-05	TCRBV05-01*01		TCRBJ01-04*01
AATGTGAGCACCTTGGAGCTGGGGGACTCGGCCCTTTATCTTTGCGCCAGCAGCTTGTATAATGATGAAAAACTGTTTTTTGGCAGT	CASSLYNDEKLFF	6	6.89568e-05	TCRBV05-01*01	TCRBD02-01	TCRBJ01-04*01
AGCACCTTGGAGCTGGGGGACTCGGCCCTTTATCTTTGCGCCAGCAGCCCCCTTACAGGCGGTCACTATGGCTACACCTTCGGTTCG	CASSPLTGGHYGYTF	6	6.89568e-05	TCRBV05-01*01	TCRBD01-01*01	TCRBJ01-02*01
ACCTTGGAGCTGGGGGACTCGGCCCTTTATCTTTGCGCCAGCAGCTTGGGCGGGGGTCTTCGCACCGGGGAGCTGTTTTTTGGAGAA	CASSLGGGLRTGELFF	6	6.89568e-05	TCRBV05-01*01	TCRBD02-01*01	TCRBJ02-02*01
AAGATCCAGCGCACACAGCAGGAGGACTCCGCCGTGTATCTCTGTGCCAGCAGCCGCACCGGGGGATACGAGCAGTACTTCGGGCCG	CASSRTGGYEQYF	6	6.89568e-05	TCRBV07-08*01	TCRBD02-01*01	TCRBJ02-07*01
ACTCTGGAGTCAGCTACCCGCTCCCAGACATCTGTGTATTTCTGCGCCAGCAGTGTTCGGAGGGCAGATACGCAGTATTTTGGCCCA	CASSVRRADTQYF	6	6.89568e-05	TCRBV10-02*01	TCRBD02-01*02	TCRBJ02-03*01
GAGTCAGCTACCCGCTCCCAGACATCTGTGTATTTCTGCGCCAGCAGGCAAGGGACAGGGGGCAACTACGAGCAGTACTTCGGGCCG	CASRQGTGGNYEQYF	6	6.89568e-05	TCRBV10-02*01	TCRBD01-01*01	TCRBJ02-07*01
CAGGTAGTGCGAGGAGATTCGGCAGCTTATTTCTGTGCCAGCTCACCACCGTCCAGCGGGGGGGCAAAGACCCAGTACTTCGGGCCA	CASSPPSSGGAKTQYF	6	6.89568e-05	TCRBV18-01*01	TCRBD02-01*01	TCRBJ02-05*01
GTGCGAGGAGATTCGGCAGCTTATTTCTGTGCCAGCTCACAGGGGGCTCGCGGTTACCCCATGAACACTGAAGCTTTCTTTGGACAA	CASSQGARGYPMNTEAFF	6	6.89568e-05	TCRBV18-01*01	TCRBD01-01*01	TCRBJ01-01*01
GTAGTGCGAGGAGATTCGGCAGCTTATTTCTGTGCCAGCTCACCGAAAAACTTCCCGACAGGGAACTATGGCTACACCTTCGGTTCG	CASSPKNFPTGNYGYTF	6	6.89568e-05	TCRBV18-01*01	TCRBD01-01*01	TCRBJ01-02*01
AGGATCCAGCAGGTAGTGCGAGGAGATTCGGCAGCTTATTTCTGTGCCAGCTCCCCGGGGGGGCTCGGAGAACTGTTTTTTGGCAGT	CASSPGGLGELFF	6	6.89568e-05	TCRBV18-01*01	TCRBD02-01*01	TCRBJ01-04*01
CTGTCGGCTGCTCCCTCCCAGACATCTGTGTACTTCTGTGCCAGCGTACAGGGGGCATGGTCGAACACTGAAGCTTTCTTTGGACAA	CASVQGAWSNTEAFF	6	6.89568e-05	TCRBV06-05*01	TCRBD01-01*01	TCRBJ01-01*01
GAGTCGGCTGCTCCCTCCCAGACATCTGTGTACTTCTGTGCCAGCAGTTACGTTCAGGGGGTTTCCTACGAGCAGTACTTCGGGCCG	CASSYVQGVSYEQYF	6	6.89568e-05	TCRBV06-05*01	TCRBD01-01*01	TCRBJ02-07*01
AGGCTGCTGTCGGCTGCTCCCTCCCAGACATCTGTGTACTTCTGTGCCAGCAGTTACTCGGAGAACACTGAAGCTTTCTTTGGACAA	CASSYSENTEAFF	6	6.89568e-05	TCRBV06-05*01		TCRBJ01-01*01
CTGCTGTCGGCTGCTCCCTCCCAGACATCTGTGTACTTCTGTGCCAGCAGCTATCGCTCTGACGGGACTGAAGCTTTCTTTGGACAA	CASSYRSDGTEAFF	6	6.89568e-05	TCRBV06-05*01	TCRBD02-01	TCRBJ01-01*01
CTGTCGGCTGCTCCCTCCCAGACATCTGTGTACTTCTGTGCCAGCAGTTACTCGACGGGCCTTAACTATGGCTACACCTTCGGTTCG	CASSYSTGLNYGYTF	6	6.89568e-05	TCRBV06-05*01		TCRBJ01-02*01
CTGTCGGCTGCTCCCTCCCAGACATCTGTGTACTTCTGTGCCAGCAGTTACGGGAAGGGGTCGGCTCAGCCCCAGCATTTTGGTGAT	CASSYGKGSAQPQHF	6	6.89568e-05	TCRBV06-05*01	TCRBD01-01*01	TCRBJ01-05*01
CTGCTGTCGGCTGCTCCCTCCCAGACATCTGTGTACTTCTGTGCCAGCAGAGCCGACAGCTACACCGGGGAGCTGTTTTTTGGAGAA	CASRADSYTGELFF	6	6.89568e-05	TCRBV06-05*01	TCRBD01-01*01	TCRBJ02-02*01
TCGGCTGCTCCCTCCCAGACATCTGTGTACTTCTGTGCCAGCAGTTACAGACAGGGGGGGCTGAGTGAAAAACTGTTTTTTGGCAGT	CASSYRQGGLSEKLFF	6	6.89568e-05	TCRBV06-05*01	TCRBD01-01*01	TCRBJ01-04*01
AGGCTGCTGTCGGCTGCTCCCTCCCAGACATCTGTGTACTTCTGTGCCAGCAGTGTGACAGGGGTGAAGACCCAGTACTTCGGGCCA	CASSVTGVKTQYF	6	6.89568e-05	TCRBV06-05*01	TCRBD01-01*01	TCRBJ02-05*01
ACTCTGACAGTGACCAGTGCCCATCCTGAAGACAGCAGCTTCTACATCTGCAGTGCTGACGAACGGGAGACCCAGTACTTCGGGCCA	CSADERETQYF	6	6.89568e-05	TCRBV20-01*01		TCRBJ02-05*01
ACTCTGACAGTGACCAGTGCCCATCCTGAAGACAGCAGCTTCTACATCTGCAGTGCAGGGGGAACCTACGAGCAGTACTTCGGGCCG	CSAGGTYEQYF	6	6.89568e-05	TCRBV20-01*01	TCRBD01-01*01	TCRBJ02-07*01
CAGCGCACAGAGCAGGGGGACTCGGCCATGTATCTCTGTGCCAGCAGCTTGGGGACCCTAGCCAAAAACATTCAGTACTTCGGCGCC	CASSLGTLAKNIQYF	6	6.89568e-05	TCRBV07-09		TCRBJ02-04*01
ACAGAGCAGGGGGACTCGGCCATGTATCTCTGTGCCAGCAGCCTAAAACTGGCGATGGCCCCTGGGGAGACCCAGTACTTCGGGCCA	CASSLKLAMAPGETQYF	6	6.89568e-05	TCRBV07-09		TCRBJ02-05*01
ACAGAGCAGGGGGACTCGGCCATGTATCTCTGTGCCAGCAGCTCGCCATCTAGCGGGGGGGCCACAGATACGCAGTATTTTGGCCCA	CASSSPSSGGATDTQYF	6	6.89568e-05	TCRBV07-09	TCRBD02-01*01	TCRBJ02-03*01
ACCTTGGAGATCCAGCGCACAGAGCAGGGGGACTCGGCCATGTATCTCTGTGCCAGCAGTTCAGGGTCCACCATATATTTTGGAGAG	CASSSGSTIYF	6	6.89568e-05	TCRBV07-09	TCRBD01-01*01	TCRBJ01-03*01
ATCCAGCGCACAGAGCAGGGGGACTCGGCCATGTATCTCTGTGCCAGCAGCCCACTCAATCGAGTCGACGGCTACACCTTCGGTTCG	CASSPLNRVDGYTF	6	6.89568e-05	TCRBV07-09		TCRBJ01-02*01
CGCACAGAGCAGGGGGACTCGGCCATGTATCTCTGTGCCAGCAGCCTTAATTCTGTCTACTCTGGAAACACCATATATTTTGGAGAG	CASSLNSVYSGNTIYF	6	6.89568e-05	TCRBV07-09	TCRBD02-01	TCRBJ01-03*01
GAGATCCAGCGCACAGAGCAGGGGGACTCGGCCATGTATCTCTGTGCCAGCAGCTCCGGGTGGGAGGTGAAACAGTTCTTCGGGCCA	CASSSGWEVKQFF	6	6.89568e-05	TCRBV07-09	TCRBD02-01*02	TCRBJ02-01*01
TTGGAGATCCAGCGCACAGAGCAGGGGGACTCGGCCATGTATCTCTGTGCCAGCAGCGTCGACAATCAGCCCCAGCATTTTGGTGAT	CASSVDNQPQHF	6	6.89568e-05	TCRBV07-09		TCRBJ01-05*01
CAGCGCACAGAGCAGGGGGACTCGGCCATGTATCTCTGTGCCAGCAGCTGGGGGACTAGCGGGGGTGAGACCCAGTACTTCGGGCCA	CASSWGTSGGETQYF	6	6.89568e-05	TCRBV07-09	TCRBD02-01*01	TCRBJ02-05*01
CGCACAGAGCAGGGGGACTCGGCCATGTATCTCTGTGCCAGCCCCTTTTATTCCCAGCACGACACCGGGGAGCTGTTTTTTGGAGAA	CASPFYSQHDTGELFF	6	6.89568e-05	TCRBV07-09		TCRBJ02-02*01
ATCCAGCGCACAGAGCAGGGGGACTCGGCCATGTATCTCTGTGCCAGCAGCTTTTCGGACGGGGGATACGAGCAGTACTTCGGGCCG	CASSFSDGGYEQYF	6	6.89568e-05	TCRBV07-09	TCRBD02-01*01	TCRBJ02-07*01
GAGATCCAGCGCACAGAGCAGGGGGACTCGGCCATGTATCTCTGTGCCAGCAGCGCCCGGGACCTCTATGGCTACACCTTCGGTTCG	CASSARDLYGYTF	6	6.89568e-05	TCRBV07-09		TCRBJ01-02*01
ATCCAGCGCACAGAGCAGGGGGACTCGGCCATGTATCTCTGTGCCAGCAGCTTAGGGCAGGGGAACACTGAAGCTTTCTTTGGACAA	CASSLGQGNTEAFF	6	6.89568e-05	TCRBV07-09	TCRBD01-01*01	TCRBJ01-01*01
TTGGAGATCCAGCGCACAGAGCAGGGGGACTCGGCCATGTATCTCTGTGCCAGCAGCCCAGACTCCGGCGGGCAGTACTTCGGGCCG	CASSPDSGGQYF	6	6.89568e-05	TCRBV07-09	TCRBD02-01	TCRBJ02-07*01
CGCACAGAGCAGCGGGACTCAGCCATGTATCGCTGTGCCAGCAGCTTAGGTCTAGCGGGGGGGTCCCACGAGCAGTACTTCGGGCCG	CASSLGLAGGSHEQYF	6	6.89568e-05	TCRBV07-07*01	TCRBD02-01*01	TCRBJ02-07*01
ATCCAGGCTACGAAGCTTGAGGATTCAGCAGTGTATTTTTGTGCCAGCAGTCCCCTGACAGCCAACTATGGCTACACCTTCGGTTCG	CASSPLTANYGYTF	6	6.89568e-05	TCRBV16-01	TCRBD01-01*01	TCRBJ01-02*01
TTGGAGCTGGGGGACTCGGCCCTTTATCTTTGCGCCAGCAGCCCGACAGGGGACCCCCTATGGAACACTGAAGCTTTCTTTGGACAA	CASSPTGDPLWNTEAFF	6	6.89568e-05	TCRBV05-01*01	TCRBD01-01*01	TCRBJ01-01*01
AATGTGAGCACCTTGGAGCTGGGGGACTCGGCCCTTTATCTTTGCGCCAGCAGCTTGGAGGGGGCCTACGAGCAGTACTTCGGGCCG	CASSLEGAYEQYF	6	6.89568e-05	TCRBV05-01*01	TCRBD01-01*01	TCRBJ02-07*01
AGCACCTTGGAGCTGGGGGACTCGGCCCTTTATCTTTGCGCCAGCAGCTTGGACGGGGGGCTATACAATGAGCAGTTCTTCGGGCCA	CASSLDGGLYNEQFF	6	6.89568e-05	TCRBV05-01*01	TCRBD02-01*01	TCRBJ02-01*01
GTGAGCACCTTGGAGCTGGGGGACTCGGCCCTTTATCTTTGCGCCAGCAGCTCCGGGGGAACTAATGAAAAACTGTTTTTTGGCAGT	CASSSGGTNEKLFF	6	6.89568e-05	TCRBV05-01*01	TCRBD02-01*01	TCRBJ01-04*01
TTGGAGCTGGGGGACTCGGCCCTTTATCTTTGCGCCAGCAGCTTGTTGCAGGGCAAAGGCAAAAATTCACCCCTCCACTTTGGGAAC	CASSLLQGKGKNSPLHF	6	6.89568e-05	TCRBV05-01*01	TCRBD01-01*01	TCRBJ01-06*01
AATGTGAGCACCTTGGAGCTGGGGGACTCGGCCCTTTATCTTTGCGCCAGCAGCCCCTCCGGGTGGAATGGCTACACCTTCGGTTCG	CASSPSGWNGYTF	6	6.89568e-05	TCRBV05-01*01	TCRBD02-01	TCRBJ01-02*01
GTGAGCACCTTGGAGCTGGGGGACTCGGCCCTTTATCTTTGCGCCAGCAGCTTACAGGGTACTAATGAAAAACTGTTTTTTGGCAGT	CASSLQGTNEKLFF	6	6.89568e-05	TCRBV05-01*01	TCRBD01-01*01	TCRBJ01-04*01
AATGTGAGCACCTTGGAGCTGGGGGACTCGGCCCTTTATCTTTGCGCCAGCAGCCACCGGGACGCCAATGAGCAGTTCTTCGGGCCA	CASSHRDANEQFF	6	6.89568e-05	TCRBV05-01*01		TCRBJ02-01*01
ATGAATGTGAGCACCTTGGAGCTGGGGGACTCGGCCCTTTATCTTTGCGCCAGCAGCTTGGCCGTTCAGCCCCAGCATTTTGGTGAT	CASSLAVQPQHF	6	6.89568e-05	TCRBV05-01*01	TCRBD02-01	TCRBJ01-05*01
AATGTGAGCACCTTGGAGCTGGGGGACTCGGCCCTTTATCTTTGCGCCAGCAGCCCACTCGTCGCCTACGAGCAGTACTTCGGGCCG	CASSPLVAYEQYF	6	6.89568e-05	TCRBV05-01*01	TCRBD02-01	TCRBJ02-07*01
CTGGAGTCCGCCAGCACCAACCAGACATCTATGTACCTCTGTGCCAGCAGTTTTTCGGGGGGAAAAGAGACCCAGTACTTCGGGCCA	CASSFSGGKETQYF	6	6.89568e-05	TCRBV28-01*01	TCRBD02-01*01	TCRBJ02-05*01
CTCACTCTGGAGTCCGCTACCAGCTCCCAGACATCTGTGTACTTCTGTGCCATCAGCTCCGGGCTCTATGGCTACACCTTCGGTTCG	CAISSGLYGYTF	6	6.89568e-05	TCRBV10-03*01		TCRBJ01-02*01
TCCGCTACCAGCTCCCAGACATCTGTGTACTTCTGTGCCATCAGTGAGTCAGGGCTCCGGGCAGCCGGGGAGCTGTTTTTTGGAGAA	CAISESGLRAAGELFF	6	6.89568e-05	TCRBV10-03*01		TCRBJ02-02*01
AGCTCCCAGACATCTGTGTACTTCTGTGCCATCAGTGATTTGGGGGGGGTATTCGGGTTTATGAACACTGAAGCTTTCTTTGGACAA	CAISDLGGVFGFMNTEAFF	6	6.89568e-05	TCRBV10-03*01	TCRBD02-01*01	TCRBJ01-01*01
CTGGAGTCGCCCAGCCCCAACCAGACCTCTCTGTACTTCTGTGCCAGCAGTTTTTTAGGGACTAATGAAAAACTGTTTTTTGGCAGT	CASSFLGTNEKLFF	6	6.89568e-05	TCRBV27-01*01		TCRBJ01-04*01
CCCAGCCCCAACCAGACCTCTCTGTACTTCTGTGCCAGCAGTTCCCGACAGGGGGCTCTTTTGTGGGAGACCCAGTACTTCGGGCCA	CASSSRQGALLWETQYF	6	6.89568e-05	TCRBV27-01*01	TCRBD01-01*01	TCRBJ02-05*01
CTGGAGTCGCCCAGCCCCAACCAGACCTCTCTGTACTTCTGTGCCAGCAGTTTAAGGCCAGCCCGGACTGAAGCTTTCTTTGGACAA	CASSLRPARTEAFF	6	6.89568e-05	TCRBV27-01*01		TCRBJ01-01*01
TCGCCCAGCCCCAACCAGACCTCTCTGTACTTCTGTGCCAGCAGCCTGGACAAGTCCGCAGCTAACTATGGCTACACCTTCGGTTCG	CASSLDKSAANYGYTF	6	6.89568e-05	TCRBV27-01*01	TCRBD01-01*01	TCRBJ01-02*01
CTGGAGTCGCCCAGCCCCAACCAGACCTCTCTGTACTTCTGTGCCAGCCGCTCTGGACAGGCAAACTATGGCTACACCTTCGGTTCG	CASRSGQANYGYTF	6	6.89568e-05	TCRBV27-01*01	TCRBD01-01*01	TCRBJ01-02*01
TCGCCCAGCCCCAACCAGACCTCTCTGTACTTCTGTGCCAGCAGACGGACAGGGGAGATTGGTAATTCACCCCTCCACTTTGGGAAC	CASRRTGEIGNSPLHF	6	6.89568e-05	TCRBV27-01*01	TCRBD01-01*01	TCRBJ01-06*01
GAGTCGCCCAGCCCCAACCAGACCTCTCTGTACTTCTGTGCCAGCAGTTTATCAGGCACTCAGGGTAGCGAGCAGTACTTCGGGCCG	CASSLSGTQGSEQYF	6	6.89568e-05	TCRBV27-01*01	TCRBD01-01*01	TCRBJ02-07*01
CTGATCCTGGAGTCGCCCAGCCCCAACCAGACCTCTCTGTACTTCTGTGCCAGCAGTACGATACAGGGGCTGGAGTATTTTGGCCCA	CASSTIQGLEYF	6	6.89568e-05	TCRBV27-01*01	TCRBD01-01*01	TCRBJ02-03*01
ATCCTGGAGTCGCCCAGCCCCAACCAGACCTCTCTGTACTTCTGTGCCAGCAGTTCCGAGCCCTACAATGAGCAGTTCTTCGGGCCA	CASSSEPYNEQFF	6	6.89568e-05	TCRBV27-01*01	TCRBD02-01	TCRBJ02-01*01
CTGGAGTCGCCCAGCCCCAACCAGACCTCTCTGTACTTCTGTGCCAGCAGTTTCGGGACGGGGCGGGAGACCCAGTACTTCGGGCCA	CASSFGTGRETQYF	6	6.89568e-05	TCRBV27-01*01		TCRBJ02-05*01
CTGGAGTCGCCCAGCCCCAACCAGACCTCTCTGTACTTCTGTGCCAGCAGCCCATCGGGGGGTTTTTGGGGCTACACCTTCGGTTCG	CASSPSGGFWGYTF	6	6.89568e-05	TCRBV27-01*01	TCRBD02-01*01	TCRBJ01-02*01
CTGGAGTCGCCCAGCCCCAACCAGACCTCTCTGTACTTCTGTGCCAGCAGTTTATCAGGGACTTGGCAGCCCCAGCATTTTGGTGAT	CASSLSGTWQPQHF	6	6.89568e-05	TCRBV27-01*01	TCRBD02-01	TCRBJ01-05*01
TGTACCTTGGAGATCCAGTCCACGGAGTCAGGGGACACAGCACTGTATTTCTGTGCCAGCAGCGGAGACGAGCAGTACTTCGGGCCG	CASSGDEQYF	6	6.89568e-05	TCRBV21-01*01	TCRBD02-01*02	TCRBJ02-07*01
CAGCGCACACAGCAGGAGGACTCGGCCGTGTATCTCTGTGCCAGCAGCTCTGGGACAGGGGGCCGGAGTGAGCAGTTCTTCGGGCCA	CASSSGTGGRSEQFF	6	6.89568e-05	TCRBV07-02*01	TCRBD01-01*01	TCRBJ02-01*01
ACGATCCAGCGCACACAGCAGGAGGACTCGGCCGTGTATCTCTGTGCCAGCAGCTACAGCTCTGGAAACACCATATATTTTGGAGAG	CASSYSSGNTIYF	6	6.89568e-05	TCRBV07-02*01	TCRBD01-01*01	TCRBJ01-03*01
CAGCGCACACAGCAGGAGGACTCGGCCGTGTATCTCTGTGCCAGCAGCTTAGGGGGGGGTAACAATCAGCCCCAGCATTTTGGTGAT	CASSLGGGNNQPQHF	6	6.89568e-05	TCRBV07-02*01	TCRBD02-01*01	TCRBJ01-05*01
ACACAGCAGGAGGACTCGGCCGTGTATCTCTGTGCCAGCAGCCCAAGTGGGGCTAGCGGGAGCCTACAAGGGCAGTTCTTCGGGCCA	CASSPSGASGSLQGQFF	6	6.89568e-05	TCRBV07-02*01	TCRBD02-01*02	TCRBJ02-01*01
ATCCAGCGCACACAGCAGGAGGACTCGGCCGTGTATCTCTGTGCCAGCAGCGCGGACAGCTCGAGGAACATTCAGTACTTCGGCGCC	CASSADSSRNIQYF	6	6.89568e-05	TCRBV07-02*01	TCRBD01-01*01	TCRBJ02-04*01
CTGACGATCCAGCGCACACAGCAGGAGGACTCGGCCGTGTATCTCTGTGCCAGCAGCTTATATGGGGGAGAGCAGTACTTCGGGCCG	CASSLYGGEQYF	6	6.89568e-05	TCRBV07-02*01		TCRBJ02-07*01
ATCCAGCGCACACAGCAGGAGGACTCGGCCGTGTATCTCTGTGCCAGCAGCGTGTGGGACAGCGCCTACGAGCAGTACTTCGGGCCG	CASSVWDSAYEQYF	6	6.89568e-05	TCRBV07-02*01	TCRBD01-01*01	TCRBJ02-07*01
ACACAGCAGGAGGACTCGGCCGTGTATCTCTGTGCCAGCAGCTTAGAAGGGACTAGCGGGGGATACAATGAGCAGTTCTTCGGGCCA	CASSLEGTSGGYNEQFF	6	6.89568e-05	TCRBV07-02*01	TCRBD02-01*01	TCRBJ02-01*01
ACTGTGAGCAACATGAGCCCTGAAGACAGCAGCATATATCTCTGCAGCGGGAAACAGGGGGTGGACACTGAAGCTTTCTTTGGACAA	CSGKQGVDTEAFF	6	6.89568e-05	TCRBV29-01*01	TCRBD01-01*01	TCRBJ01-01*01
CTGACTGTGAGCAACATGAGCCCTGAAGACAGCAGCATATATCTCTGCAGCGTTTCAGGGGTGAACACTGAAGCTTTCTTTGGACAA	CSVSGVNTEAFF	6	6.89568e-05	TCRBV29-01*01	TCRBD01-01*01	TCRBJ01-01*01
CGCACACAGCAGGAGGACTCGGCCGTGTATCTCTGTGCCAGCAGCCCCGGGACAGGGGGTAGAATTTCACCCCTCCACTTTGGGAAC	CASSPGTGGRISPLHF	6	6.89568e-05	TCRBV07-02*01	TCRBD01-01*01	TCRBJ01-06*01
CAGCCTGCAAAGCTTGAGGACTCGGCCGTGTATCTCTGTGCCAGCAGCTCACTCCAGGGTACAGGTCAGCCCCAGCATTTTGGTGAT	CASSSLQGTGQPQHF	6	6.89568e-05	TCRBV11-02*02	TCRBD01-01*01	TCRBJ01-05*01
TCGGCCCAAAAGAACCCGACAGCTTTCTATCTCTGTGCCAGTAGTATTAAGGGGGCAGGGGGCAGCTATGGCTACACCTTCGGTTCG	CASSIKGAGGSYGYTF	6	6.89568e-05	TCRBV19-01	TCRBD01-01*01	TCRBJ01-02*01
CCTGCAAAGCTTGAGGACTCGGCCGTGTATCTCTGTGCCAGCAGCCCTCAGGGGCGGGGGAGCCAAGAGACCCAGTACTTCGGGCCA	CASSPQGRGSQETQYF	6	6.89568e-05	TCRBV11-02*02	TCRBD02-01*01	TCRBJ02-05*01
CAGCCTGCAAAGCTTGAGGACTCGGCCGTGTATCTCTGTGCCAGCAGCTTAGACCGGTTCTCTGGAAACACCATATATTTTGGAGAG	CASSLDRFSGNTIYF	6	6.89568e-05	TCRBV11-02*02	TCRBD02-01	TCRBJ01-03*01
CAGCCTGCAAAGCTTGAGGACTCGGCCGTGTATCTCTGTGCCAGCAGCCCCGGACAGGGAGTCTACTACGAGCAGTACTTCGGGCCG	CASSPGQGVYYEQYF	6	6.89568e-05	TCRBV11-02*02	TCRBD01-01*01	TCRBJ02-07*01
AAGATCCAGCCTGCAAAGCTTGAGGACTCGGCCGTGTATCTCTGTGCCAGCAGCTTAGATCCCCTTCAGCCCCAGCATTTTGGTGAT	CASSLDPLQPQHF	6	6.89568e-05	TCRBV11-02*02	TCRBD02-01	TCRBJ01-05*01
CAGCCTGCAGAGCTTGGGGACTCGGCCGTGTATCTCTGTGCCAGCAGCCGAACGACAGACTTCGGAGATACGCAGTATTTTGGCCCA	CASSRTTDFGDTQYF	6	6.89568e-05	TCRBV11-03*01	TCRBD01-01*01	TCRBJ02-03*01
ACATCGGCCCAAAAGAACCCGACAGCTTTCTATCTCTGTGCCAGCTCGACGGAACAGGGGGCGTTTGAAAAACTGTTTTTTGGCAGT	CASSTEQGAFEKLFF	6	6.89568e-05	TCRBV19-01	TCRBD01-01*01	TCRBJ01-04*01
CTCACTGTGACATCGGCCCAAAAGAACCCGACAGCTTTCTATCTCTGTGCCAGTAGTATTGAGGGCTACACCATATATTTTGGAGAG	CASSIEGYTIYF	6	6.89568e-05	TCRBV19-01	TCRBD02-01*02	TCRBJ01-03*01
ACATCGGCCCAAAAGAACCCGACAGCTTTCTATCTCTGTGCCAGTAGTATGAGTAACAGATACACCGGGGAGCTGTTTTTTGGAGAA	CASSMSNRYTGELFF	6	6.89568e-05	TCRBV19-01	TCRBD01-01*01	TCRBJ02-02*01
CAAAAGAACCCGACAGCTTTCTATCTCTGTGCCAGTAGTGTGGGTCGACTAGCGGGGGGGAACACCGGGGAGCTGTTTTTTGGAGAA	CASSVGRLAGGNTGELFF	6	6.89568e-05	TCRBV19-01	TCRBD02-01*01	TCRBJ02-02*01
ACATCGGCCCAAAAGAACCCGACAGCTTTCTATCTCTGTGCCAGTAGTATAATGAGGGGGGACACAGATACGCAGTATTTTGGCCCA	CASSIMRGDTDTQYF	6	6.89568e-05	TCRBV19-01		TCRBJ02-03*01
GTGACATCGGCCCAAAAGAACCCGACAGCTTTCTATCTCTGTGCCAGTAGTATCAACAGGGTCGGAAATGAGCAGTTCTTCGGGCCA	CASSINRVGNEQFF	6	6.89568e-05	TCRBV19-01	TCRBD01-01*01	TCRBJ02-01*01
ACTGTGACATCGGCCCAAAAGAACCCGACAGCTTTCTATCTCTGTGCCAGTAGCAAAGACGGGGAGGGGACCCAGTACTTCGGGCCA	CASSKDGEGTQYF	6	6.89568e-05	TCRBV19-01	TCRBD02-01*02	TCRBJ02-05*01
CTCAAGATCCAGCCTGCAGAGCTTGGGGACTCGGCCGTGTATCTCTGTGCCAGCAGCTTATATGGGGGAGAGCAGTACTTCGGGCCG	CASSLYGGEQYF	6	6.89568e-05	TCRBV11-03*01		TCRBJ02-07*01
ATCCAGCCCTCAGAACCCAGGGACTCAGCTGTGTATTTTTGTGCTAGTGCCCCGGGACAGGTCTACAATGAGCAGTTCTTCGGGCCA	CASAPGQVYNEQFF	6	6.89568e-05	TCRBV12-05*01	TCRBD01-01*01	TCRBJ02-01*01
ATCCAGCCCTCAGAACCCAGGGACTCAGCTGTGTATTTTTGTGCTAGTGGTTTGGTACCAACTTCCTGGGAGCTGTTTTTTGGAGAA	CASGLVPTSWELFF	6	6.89568e-05	TCRBV12-05*01	TCRBD02-01	TCRBJ02-02*01
CAGCCCTCAGAACCCAGGGACTCAGCTGTGTATTTTTGTGCTAGTGATCATCCACGGGGGTGGGACACTGAAGCTTTCTTTGGACAA	CASDHPRGWDTEAFF	6	6.89568e-05	TCRBV12-05*01	TCRBD02-01*01	TCRBJ01-01*01
CTGACCCTGGAGTCTGCCAGGCCCTCACATACCTCTCAGTACCTCTGTGCCAGCAGTGGGAACACAGATACGCAGTATTTTGGCCCA	CASSGNTDTQYF	6	6.89568e-05	TCRBV25-01*01		TCRBJ02-03*01
CTGAACATGAGCTCCTTGGAGCTGGGGGACTCAGCCCTGTACTTCTGTGCCAGCAGCTTAGATACAGATACGCAGTATTTTGGCCCA	CASSLDTDTQYF	6	6.89568e-05	TCRBV13-01*01		TCRBJ02-03*01
GCTGCTCCCTCCCAAACATCTGTGTACTTCTGTGCCAGCAGTTATAATCCGGGTAGGGGAGGGGTGACTGAAGCTTTCTTTGGACAA	CASSYNPGRGGVTEAFF	6	6.89568e-05	TCRBV06	TCRBD02-01*02	TCRBJ01-01*01
CTGACAGTGACCAGTGCCCATCCTGAAGACAGCAGCTTCTACATCTGCAGTGCTAGGGCGGGGAATCAGCCCCAGCATTTTGGTGAT	CSARAGNQPQHF	6	6.89568e-05	TCRBV20	TCRBD02-01*01	TCRBJ01-05*01
ATCCAGCCCTCAGAACCCAGGGACTCAGCTGTGTACTTCTGTGCCAGCAGTCCGGGACTTTCCTCCTACGAGCAGTACTTCGGGCCG	CASSPGLSSYEQYF	6	6.89568e-05	TCRBV12	TCRBD02-01	TCRBJ02-07*01
TCCCTGGAGCTTGGTGACTCTGCTGTGTATTTCTGTGCCAGCAGCCGCACCGTCGGAGCGGAAACAGATACGCAGTATTTTGGCCCA	CASSRTVGAETDTQYF	6	6.89568e-05	TCRBV03	TCRBD02-01	TCRBJ02-03*01
CTGAAGATCCAGCCCTCAGAACCCAGGGACTCAGCTGTGTACTTCTGTGCCAGCAGTTTAGCTGGAAACACCATATATTTTGGAGAG	CASSLAGNTIYF	6	6.89568e-05	TCRBV12		TCRBJ01-03*01
CTTCACATCAATTCCCTGGAGCTTGGTGACTCTGCTGTGTATTTCTGTGCCAGCGGGACAGGTAACACTGAAGCTTTCTTTGGACAA	CASGTGNTEAFF	6	6.89568e-05	TCRBV03	TCRBD01-01*01	TCRBJ01-01*01
CACATCAATTCCCTGGAGCTTGGTGACTCTGCTGTGTATTTCTGTGCCAGCAGCCAAGGGGGTGGAAACACCATATATTTTGGAGAG	CASSQGGGNTIYF	6	6.89568e-05	TCRBV03		TCRBJ01-03*01
TCCCTAGAGTCTGCCATCCCCAACCAGACAGCTCTTTACTTCTGTGCCCCGATGGGACGGGTCAAGTTCGAGCAGTACTTCGGGCCG	CAPMGRVKFEQYF	6	6.89568e-05	TCRBV24		TCRBJ02-07*01
GTGACCAGTGCCCATCCTGAAGACAGCAGCTTCTACATCTGCAGTGCCTCACCTAGCGGGGGGAACTACGAGCAGTACTTCGGGCCG	CSASPSGGNYEQYF	6	6.89568e-05	TCRBV20	TCRBD02-01*01	TCRBJ02-07*01
GTGACCAGTGCCCATCCTGAAGACAGCAGCTTCTACATCTGCAGTGCTAGACTAGCGGGGGGGCAAGAGACCCAGTACTTCGGGCCA	CSARLAGGQETQYF	6	6.89568e-05	TCRBV20	TCRBD02-01*01	TCRBJ02-05*01
AATTCCCTGGAGCTTGGTGACTCTGCTGTGTATTTCTGTGCCAGCAGCCCGGTGGGTAGCGGAACCTACGAGCAGTACTTCGGGCCG	CASSPVGSGTYEQYF	6	6.89568e-05	TCRBV03	TCRBD02-01	TCRBJ02-07*01
TCAGAACCCAGGGACTCAGCTGTGTACTTCTGTGCCAGCAGTTTGAGGACAGATCCCACATTGAGGGATGGCTACACCTTCGGTTCG	CASSLRTDPTLRDGYTF	6	6.89568e-05	TCRBV12	TCRBD01-01*01	TCRBJ01-02*01
ACCAGTGCCCATCCTGAAGACAGCAGCTTCTACATCTGCAGTGCTAGAGATGCGGCTAGCCGATCCAATGAGCAGTTCTTCGGGCCA	CSARDAASRSNEQFF	6	6.89568e-05	TCRBV20	TCRBD02-01	TCRBJ02-01*01
ACAGTGACCAGTGCCCATCCTGAAGACAGCAGCTTCTACATCTGCAGTGCTGGGACAGGGAATGATTCACCCCTCCACTTTGGGAAC	CSAGTGNDSPLHF	6	6.89568e-05	TCRBV20	TCRBD01-01*01	TCRBJ01-06*01
GAGTCGGCTGCTCCCTCCCAAACATCTGTGTACTTCTGTGCCAGCAGTTACTATACCGGAGGGAATCAGCCCCAGCATTTTGGTGAT	CASSYYTGGNQPQHF	6	6.89568e-05	TCRBV06	TCRBD02-01*02	TCRBJ01-05*01
TTGGAGTCGGCTGCTCCCTCCCAAACATCTGTGTACTTCTGTGCCAGCAGGAGACAGGGGGTTCCCTACGAGCAGTACTTCGGGCCG	CASRRQGVPYEQYF	6	6.89568e-05	TCRBV06	TCRBD01-01*01	TCRBJ02-07*01
ACAGTGACCAGTGCCCATCCTGAAGACAGCAGCTTCTACATCTGCAGTGCTAGAGCCGGGGCAGATCAGCCCCAGCATTTTGGTGAT	CSARAGADQPQHF	6	6.89568e-05	TCRBV20		TCRBJ01-05*01
ATCAATTCCCTGGAGCTTGGTGACTCTGCTGTGTATTTCTGTGCCAGCAGCCAAGAGGGACAGGGTTGGGGCTACACCTTCGGTTCG	CASSQEGQGWGYTF	6	6.89568e-05	TCRBV03	TCRBD01-01*01	TCRBJ01-02*01
ATCCAGCCCTCAGAACCCAGGGACTCAGCTGTGTACTTCTGTGCCAGCAGACCACCGGACCGTTTCACTGAAGCTTTCTTTGGACAA	CASRPPDRFTEAFF	6	6.89568e-05	TCRBV12		TCRBJ01-01*01
GGGTTGGAGTCGGCTGCTCCCTCCCAAACATCTGTGTACTTCTGTGCCAGCACCGACAGCAGCACAGATACGCAGTATTTTGGCCCA	CASTDSSTDTQYF	6	6.89568e-05	TCRBV06	TCRBD01-01*01	TCRBJ02-03*01
AAGATCCAGCCCTCAGAACCCAGGGACTCAGCTGTGTACTTCTGTGCCAGCAGTCCGGACAGGGGTCAGCCCCAGCATTTTGGTGAT	CASSPDRGQPQHF	6	6.89568e-05	TCRBV12	TCRBD01-01*01	TCRBJ01-05*01
GAGTCGGCTGCTCCCTCCCAAACATCTGTGTACTTCTGTGCCAGCAGTTACGTTCAGGGGGTTTCCTACGAGCAGTACTTCGGGCCG	CASSYVQGVSYEQYF	6	6.89568e-05	TCRBV06	TCRBD01-01*01	TCRBJ02-07*01
CCCTCCCAAACATCTGTGTACTTCTGTGCCAGCAGTTACTGGACGCCGCGGTCTGTCAGGGAATCCGGGGAGCTGTTTTTTGGAGAA	CASSYWTPRSVRESGELFF	6	6.89568e-05	TCRBV06	TCRBD01-01*01	TCRBJ02-02*01
GAACCCAGGGACTCAGCTGTGTACTTCTGTGCCAGCAGTTTTCAACCACTAGCGGGGGCCTCCTACAATGAGCAGTTCTTCGGGCCA	CASSFQPLAGASYNEQFF	6	6.89568e-05	TCRBV12	TCRBD02-01*01	TCRBJ02-01*01
GCTCCCTCCCAGACATCTGTGTACTTCTGTGCCAGCAGTTACTCCCGGCCTAGCGGGGGGATAAACAATGAGCAGTTCTTCGGGCCA	CASSYSRPSGGINNEQFF	6	6.89568e-05	TCRBV06	TCRBD02-01*01	TCRBJ02-01*01
CTGACAGTGACCAGTGCCCATCCTGAAGACAGCAGCTTCTACATCTGCAGTGCTAGAGATCTTTCAGATACGCAGTATTTTGGCCCA	CSARDLSDTQYF	6	6.89568e-05	TCRBV20	TCRBD02-01	TCRBJ02-03*01
TCCCTGGAGCTTGGTGACTCTGCTGTGTATTTCTGTGCCAGCAGCCAAGATCATCCCAGGGGACCGTCACCCCTCCACTTTGGGAAC	CASSQDHPRGPSPLHF	6	6.89568e-05	TCRBV03	TCRBD01-01*01	TCRBJ01-06*01
TCCCTAGAGTCTGCCATCCCCAACCAGACAGCTCTTTACTTCTGTGCCACCAGTAGTGCGTACCAAGAGACCCAGTACTTCGGGCCA	CATSSAYQETQYF	6	6.89568e-05	TCRBV24	TCRBD02-01	TCRBJ02-05*01
ATCAATTCCCTGGAGCTTGGTGACTCTGCTGTGTATTTCTGTGCCAGCAGCCAACGGGACAACCTCCCTGGGCAGTACTTCGGGCCG	CASSQRDNLPGQYF	6	6.89568e-05	TCRBV03	TCRBD01-01*01	TCRBJ02-07*01
TCCCTGGAGCTTGGTGACTCTGCTGTGTATTTCTGTGCCAGCAGCCCACCGGGACTTATTACTCATTCACCCCTCCACTTTGGGAAC	CASSPPGLITHSPLHF	6	6.89568e-05	TCRBV03	TCRBD02-01	TCRBJ01-06*01
CCCTCAGAACCCAGGGACTCAGCTGTGTACTTCTGTGCCAGCAGTTTACAGGGACTAGCACCCCTCGATGAGCAGTTCTTCGGGCCA	CASSLQGLAPLDEQFF	6	6.89568e-05	TCRBV12	TCRBD02-01	TCRBJ02-01*01
CTTCACATCAATTCCCTGGAGCTTGGTGACTCTGCTGTGTATTTCTGTGCCAGTGGCCTCTCCTACAATGAGCAGTTCTTCGGGCCA	CASGLSYNEQFF	6	6.89568e-05	TCRBV03	TCRBD01-01*01	TCRBJ02-01*01
CTGCTGGGGTTGGAGTCGGCTGCTCCCTCCCAAACATCTGTGTACTTCTGTGCCAGCAGTCATGGGGTCACCCAGTACTTCGGGCCA	CASSHGVTQYF	6	6.89568e-05	TCRBV06		TCRBJ02-05*01
GCTCCCTCCCAAACATCTGTGTACTTCTGTGCCAGCAACCCCGGACAGAAAAAAAGCTCCTATAATTCACCCCTCCACTTTGGGAAC	CASNPGQKKSSYNSPLHF	6	6.89568e-05	TCRBV06	TCRBD01-01*01	TCRBJ01-06*01
AGTGCCCATCCTGAAGACAGCAGCTTCTACATCTGCAGTGCTAGAGGTGCTAGCGGGGGGCCAAGTTACGAGCAGTACTTCGGGCCG	CSARGASGGPSYEQYF	6	6.89568e-05	TCRBV20	TCRBD02-01*01	TCRBJ02-07*01
CTGACAGTGACCAGTGCCCATCCTGAAGACAGCAGCTTCTACATCTGCAGTACCCGACAGGGAGGCTATGGCTACACCTTCGGTTCG	CSTRQGGYGYTF	6	6.89568e-05	TCRBV20	TCRBD01-01*01	TCRBJ01-02*01
CTGAAGATCCAGCCCTCAGAACCCAGGGACTCAGCTGTGTACTTCTGTGCCAGCAGTTTAAACGTCTACGAGCAGTACTTCGGGCCG	CASSLNVYEQYF	6	6.89568e-05	TCRBV12		TCRBJ02-07*01
CTTCACATCAATTCCCTGGAGCTTGGTGACTCTGCTGTGTATTTCTGTGCCAGCAGCCTACGTAACTACGAGCAGTACTTCGGGCCG	CASSLRNYEQYF	6	6.89568e-05	TCRBV03		TCRBJ02-07*01
ACAGTGACCAGTGCCCATCCTGAAGACAGCAGCTTCTACATCTGCAGTGCTACCGCCGGGACCCAGAATGAGCAGTTCTTCGGGCCA	CSATAGTQNEQFF	6	6.89568e-05	TCRBV20		TCRBJ02-01*01
ACAGTGACCAGTGCCCATCCTGAAGACAGCAGCTTCTACATCTGCAGTGCTAGGTACGGACTCCAAGAGACCCAGTACTTCGGGCCA	CSARYGLQETQYF	6	6.89568e-05	TCRBV20	TCRBD02-01	TCRBJ02-05*01
AAGATCCAGCCCTCAGAACCCAGGGACTCAGCTGTGTACTTCTGTGCCAGCAGCCCCCGGGGGGGCTACGAGCAGTACTTCGGGCCG	CASSPRGGYEQYF	6	6.89568e-05	TCRBV12	TCRBD02-01*01	TCRBJ02-07*01
GTGACCAGTGCCCATCCTGAAGACAGCAGCTTCTACATCTGCAGTGCTAGATCTTTGAGGGAAATAGATACGCAGTATTTTGGCCCA	CSARSLREIDTQYF	6	6.89568e-05	TCRBV20	TCRBD02-01*02	TCRBJ02-03*01
ATCCAGCCCTCAGAACCCAGGGACTCAGCTGTGTACTTCTGTGCCAGCAGGGGACAGGGGGCAGGGTACGAGCAGTACTTCGGGCCG	CASRGQGAGYEQYF	6	6.89568e-05	TCRBV12	TCRBD01-01*01	TCRBJ02-07*01
CACACCCTGCAGCCAGAAGACTCGGCCCTGTATCTCTGTGCCAGCAGCCAAGAGGTCCAGTATCAGTCCGAGCAGTACTTCGGGCCG	CASSQEVQYQSEQYF	5	5.7464e-05	TCRBV04-02*01	TCRBD01-01*01	TCRBJ02-07*01
CTTCACCTACACACCCTGCAGCCAGAAGACTCGGCCCTGTATCTCTGTGCCAGCAGCCAATGGGGGGAGACCCAGTACTTCGGGCCA	CASSQWGETQYF	5	5.7464e-05	TCRBV04-02*01		TCRBJ02-05*01
TTGTTGCTGGGGGACTCGGCCCTCTATCTCTGTGCCAGCAGCTTGTCCGCTCAGGGCCTGGGAAATCAGCCCCAGCATTTTGGTGAT	CASSLSAQGLGNQPQHF	5	5.7464e-05	TCRBV05-06*01	TCRBD01-01*01	TCRBJ01-05*01
GTGAACGCCTTGTTGCTGGGGGACTCGGCCCTCTATCTCTGTGCCAGCAGCTTGTCCCTAGAACGCAATGAGCAGTTCTTCGGGCCA	CASSLSLERNEQFF	5	5.7464e-05	TCRBV05-06*01	TCRBD02-01	TCRBJ02-01*01
CAGCGCACAGAGCAGCGGGACTCGGCCATGTATCGCTGTGCCAGCAGCTTAGAACTAGCGGGTGGGGATACGCAGTATTTTGGCCCA	CASSLELAGGDTQYF	5	5.7464e-05	TCRBV07-06*01	TCRBD02-01	TCRBJ02-03*01
ACGATCCAGCGCACAGAGCAGCGGGACTCGGCCATGTATCGCTGTGCCAGCAGCCCGAATTGGGGAGAGACCCAGTACTTCGGGCCA	CASSPNWGETQYF	5	5.7464e-05	TCRBV07-06*01		TCRBJ02-05*01
CTTGACATCCGCTCACCAGGCCTGGGGGACGCAGCCATGTACCTGTGTGCCACCAGCAGAGATCAAAGTGGCTACACCTTCGGTTCG	CATSRDQSGYTF	5	5.7464e-05	TCRBV15-01*01		TCRBJ01-02*01
TCACCAGGCCTGGGGGACGCAGCCATGTACCTGTGTGCCACCAGCCGGCGTAGACAGACCTCTGGAAACACCATATATTTTGGAGAG	CATSRRRQTSGNTIYF	5	5.7464e-05	TCRBV15-01*01	TCRBD01-01*01	TCRBJ01-03*01
ATCCGCTCACCAGGCCTGGGGGACGCAGCCATGTACCTGTGTGCCACCAGCGGCGACACCTACACCGGGGAGCTGTTTTTTGGAGAA	CATSGDTYTGELFF	5	5.7464e-05	TCRBV15-01*01	TCRBD01-01*01	TCRBJ02-02*01
CGCTCACCAGGCCTGGGGGACGCAGCCATGTACCTGTGTGCCACCAGCAGAGGTAGCGGGGGGGCAGATACGCAGTATTTTGGCCCA	CATSRGSGGADTQYF	5	5.7464e-05	TCRBV15-01*01	TCRBD02-01*01	TCRBJ02-03*01
CGCTCACCAGGCCTGGGGGACGCAGCCATGTACCTGTGTGCCACCAGCCCGAAAGGACAGCGATTTAATGAGCAGTTCTTCGGGCCA	CATSPKGQRFNEQFF	5	5.7464e-05	TCRBV15-01*01	TCRBD01-01*01	TCRBJ02-01*01
CACACCCTGCAGCCAGAAGACTCGGCCCTGTATCTCTGCGCCAGCAGCCAAGAAGAGGGAAGCTCCTACGAGCAGTACTTCGGGCCG	CASSQEEGSSYEQYF	5	5.7464e-05	TCRBV04-03*01	TCRBD02-01*02	TCRBJ02-07*01
CTTCACCTACACACCCTGCAGCCAGAAGACTCGGCCCTGTATCTCTGCGCCAGCAAGGGGGGCACAGATACGCAGTATTTTGGCCCA	CASKGGTDTQYF	5	5.7464e-05	TCRBV04-03*01	TCRBD01-01*01	TCRBJ02-03*01
CTACACACCCTGCAGCCAGAAGACTCGGCCCTGTATCTCTGCGCCAGCAGCCGGCAACAGGGGGCGGATACGCAGTATTTTGGCCCA	CASSRQQGADTQYF	5	5.7464e-05	TCRBV04-03*01	TCRBD01-01*01	TCRBJ02-03*01
CTACACACCCTGCAGCCAGAAGACTCGGCCCTGTATCTCTGCGCCAGCAGCCAGAACCAGGGGTTGGAGACCCAGTACTTCGGGCCA	CASSQNQGLETQYF	5	5.7464e-05	TCRBV04-03*01	TCRBD01-01*01	TCRBJ02-05*01
ACCCTGCAGCCAGAAGACTCGGCCCTGTATCTCTGCGCCAGCAGCCCAGACGTAGCGGGGGGGTTAGGTGAGCAGTTCTTCGGGCCA	CASSPDVAGGLGEQFF	5	5.7464e-05	TCRBV04-03*01	TCRBD02-01*01	TCRBJ02-01*01
AACGCCTTGTTGCTGGGGGACTCGGCCCTGTATCTCTGTGCCAGCAGCTTGCAGACTAGCGGGTTCTACGAGCAGTACTTCGGGCCG	CASSLQTSGFYEQYF	5	5.7464e-05	TCRBV05-05*01	TCRBD02-01	TCRBJ02-07*01
TTGCTGGGGGACTCGGCCCTGTATCTCTGTGCCAGCAGCTTGACGAGGACAGGGGGCAAAAAGGGTCAGCCCCAGCATTTTGGTGAT	CASSLTRTGGKKGQPQHF	5	5.7464e-05	TCRBV05-05*01	TCRBD01-01*01	TCRBJ01-05*01
CTGAATGTGAACGCCTTGTTGCTGGGGGACTCGGCCCTGTATCTCTGTGCCAGCAGCGGAGATGGAGCTGAGCAGTTCTTCGGGCCA	CASSGDGAEQFF	5	5.7464e-05	TCRBV05-05*01	TCRBD02-01*02	TCRBJ02-01*01
CTGAGCTCTCTGGAGCTGGGGGACTCAGCTTTGTATTTCTGTGCCAGCAGCCCCAGGACAGTGCTCTCACCCCTCCACTTTGGGAAC	CASSPRTVLSPLHF	5	5.7464e-05	TCRBV09-01	TCRBD01-01*01	TCRBJ01-06*01
TCTCTGGAGCTGGGGGACTCAGCTTTGTATTTCTGTGCCAGCAGCGCAGACCCCCTACCTAAAGGCTATGGCTACACCTTCGGTTCG	CASSADPLPKGYGYTF	5	5.7464e-05	TCRBV09-01		TCRBJ01-02*01
GTGAGTGCCTTGGAGCTGGGGGACTCGGCCCTGTATCTCTGTGCCAGAAGCACCCGGGACACCCAAGAGACCCAGTACTTCGGGCCA	CARSTRDTQETQYF	5	5.7464e-05	TCRBV05-03	TCRBD01-01*01	TCRBJ02-05*01
GAGTCGGCTGCTCCCTCCCAGACATCTGTGTACTTCTGTGCCAGCAGTGCTAGCGGGGGGGCCTCCGGGGAGCTGTTTTTTGGAGAA	CASSASGGASGELFF	5	5.7464e-05	TCRBV06-01*01	TCRBD02-01*01	TCRBJ02-02*01
GAGTCGGCTGCTCCCTCCCAGACATCTGTGTACTTCTGTGCCAGCAGTGGGGAGGGGGCCGTCGGCTACGAGCAGTACTTCGGGCCG	CASSGEGAVGYEQYF	5	5.7464e-05	TCRBV06-01*01		TCRBJ02-07*01
TCGCTCAGGCTGGAGTCGGCTGCTCCCTCCCAGACATCTGTGTACTTCTGTGCCAGCAAAATCGTGACTGAAGCTTTCTTTGGACAA	CASKIVTEAFF	5	5.7464e-05	TCRBV06-01*01	TCRBD02-01	TCRBJ01-01*01
CTGGAGTCGGCTGCTCCCTCCCAGACATCTGTGTACTTCTGTGCCAGCAGTGAAAGTAGGGGTTTGGATGGCTACACCTTCGGTTCG	CASSESRGLDGYTF	5	5.7464e-05	TCRBV06-01*01	TCRBD01-01*01	TCRBJ01-02*01
GAGTCGGCTGCTCCCTCCCAGACATCTGTGTACTTCTGTGCCAGCAGATCCCCGGGACAGGGGAACACTGAAGCTTTCTTTGGACAA	CASRSPGQGNTEAFF	5	5.7464e-05	TCRBV06-01*01	TCRBD01-01*01	TCRBJ01-01*01
TCGGCTGCTCCCTCCCAGACATCTGTGTACTTCTGTGCCAGCAGTGAATATGGGTCCCTAGCCAAAAACATTCAGTACTTCGGCGCC	CASSEYGSLAKNIQYF	5	5.7464e-05	TCRBV06-01*01		TCRBJ02-04*01
AGGCTGGAGTCGGCTGCTCCCTCCCAGACATCTGTGTACTTCTGTGCCAGCAGACACAGGGACTCCTACGAGCAGTACTTCGGGCCG	CASRHRDSYEQYF	5	5.7464e-05	TCRBV06-01*01	TCRBD01-01*01	TCRBJ02-07*01
GTGAACGCCTTGTTGCTGGGGGACTCGGCCCTCTATCTCTGTGCCAGCAGCTCGATCGACGGCCCAGATGAGCAGTTCTTCGGGCCA	CASSSIDGPDEQFF	5	5.7464e-05	TCRBV05-06*01		TCRBJ02-01*01
GAGCTGAATGTGAACGCCTTGTTGCTGGGGGACTCGGCCCTCTATCTCTGTGCCAGCAGCTCAGGAGAAAAACTGTTTTTTGGCAGT	CASSSGEKLFF	5	5.7464e-05	TCRBV05-06*01	TCRBD01-01*01	TCRBJ01-04*01
AACGCCTTGTTGCTGGGGGACTCGGCCCTCTATCTCTGTGCCAGCAGCCCCGGGACAGGGTTCACAGATACGCAGTATTTTGGCCCA	CASSPGTGFTDTQYF	5	5.7464e-05	TCRBV05-06*01	TCRBD01-01*01	TCRBJ02-03*01
AATGTGAACGCCTTGTTGCTGGGGGACTCGGCCCTCTATCTCTGTGCCAGCAGCTTGGGGACACTCCATACGCAGTATTTTGGCCCA	CASSLGTLHTQYF	5	5.7464e-05	TCRBV05-06*01	TCRBD01-01*01	TCRBJ02-03*01
CTGAATGTGAACGCCTTGTTGCTGGGGGACTCGGCCCTCTATCTCTGTGCCAGCGGTCTTACTGGAAACACCATATATTTTGGAGAG	CASGLTGNTIYF	5	5.7464e-05	TCRBV05-06*01		TCRBJ01-03*01
GTGAACGCCTTGTTGCTGGGGGACTCGGCCCTCTATCTCTGTGCCAGCAGCGTACGACAGGGGATCGGGGAGCTGTTTTTTGGAGAA	CASSVRQGIGELFF	5	5.7464e-05	TCRBV05-06*01	TCRBD01-01*01	TCRBJ02-02*01
GCCTTGTTGCTGGGGGACTCGGCCCTCTATCTCTGTGCCAGCAGCTCCCAAGGAGGCAGGGCTATCTATGGCTACACCTTCGGTTCG	CASSSQGGRAIYGYTF	5	5.7464e-05	TCRBV05-06*01		TCRBJ01-02*01
GTGAACGCCTTGTTGCTGGGGGACTCGGCCCTCTATCTCTGTGCCAGCAGTCCAAGCGGGTCCAGCAACGAGCAGTACTTCGGGCCG	CASSPSGSSNEQYF	5	5.7464e-05	TCRBV05-06*01	TCRBD02-01	TCRBJ02-07*01
AATGTGAACGCCTTGTTGCTGGGGGACTCGGCCCTCTATCTCTGTGCCAGCAGCTCGGGACTCGACTACGAGCAGTACTTCGGGCCG	CASSSGLDYEQYF	5	5.7464e-05	TCRBV05-06*01	TCRBD02-01	TCRBJ02-07*01
GCCCTGCAGCCAGAAGACTCAGCCCTGTATCTCTGCGCCAGCAGCCAAAGGACAGGACCCAACCCCTACGAGCAGTACTTCGGGCCG	CASSQRTGPNPYEQYF	5	5.7464e-05	TCRBV04-01*01	TCRBD01-01*01	TCRBJ02-07*01
CACGCCCTGCAGCCAGAAGACTCAGCCCTGTATCTCTGCGCCAGCAGCCAGTATAGCGGGGCGACAGATACGCAGTATTTTGGCCCA	CASSQYSGATDTQYF	5	5.7464e-05	TCRBV04-01*01	TCRBD02-01*01	TCRBJ02-03*01
GCCCTGCAGCCAGAAGACTCAGCCCTGTATCTCTGCGCCAGCAGCCGCCTACAGGGGGCTTCGGGAAACACCATATATTTTGGAGAG	CASSRLQGASGNTIYF	5	5.7464e-05	TCRBV04-01*01	TCRBD01-01*01	TCRBJ01-03*01
CACGCCCTGCAGCCAGAAGACTCAGCCCTGTATCTCTGCGCCAGCAGCCAAGCCCAGACTAGTATGGAGACCCAGTACTTCGGGCCA	CASSQAQTSMETQYF	5	5.7464e-05	TCRBV04-01*01	TCRBD02-01	TCRBJ02-05*01
CTACACGCCCTGCAGCCAGAAGACTCAGCCCTGTATCTCTGCGCCAGCAGCCAAGGACAGGCATCCTACGAGCAGTACTTCGGGCCG	CASSQGQASYEQYF	5	5.7464e-05	TCRBV04-01*01	TCRBD01-01*01	TCRBJ02-07*01
GCCCTGCAGCCAGAAGACTCAGCCCTGTATCTCTGCGCCAGCAGCCAAGATGTTTCCAGGGTGGGGGAAAAACTGTTTTTTGGCAGT	CASSQDVSRVGEKLFF	5	5.7464e-05	TCRBV04-01*01	TCRBD01-01*01	TCRBJ01-04*01
ACCCTGCAGCCAGAAGACTCGGCCCTGTATCTCTGCGCCAGCAGCCAAGGGGTTGCGTATGGGGACACTGAAGCTTTCTTTGGACAA	CASSQGVAYGDTEAFF	5	5.7464e-05	TCRBV04-03*01		TCRBJ01-01*01
CTGGAGTTGGCTGCTCCCTCCCAGACATCTGTGTACTTCTGTGCCAGCAGAACCCCGTCGGAGGGAAATGGCTACACCTTCGGTTCG	CASRTPSEGNGYTF	5	5.7464e-05	TCRBV06-06	TCRBD02-01*02	TCRBJ01-02*01
CTGAAGATCCGGTCCACAAAGCTGGAGGACTCAGCCATGTACTTCTGTGCCAGCAGTGGAGGAAGCTTCCGAGCTTTCTTTGGACAA	CASSGGSFRAFF	5	5.7464e-05	TCRBV02-01*01	TCRBD02-01*02	TCRBJ01-01*01
ATCCGGTCCACAAAGCTGGAGGACTCAGCCATGTACTTCTGTGCCAGCATGATAGGAGAGCTAAATTCACCCCTCCACTTTGGGAAC	CASMIGELNSPLHF	5	5.7464e-05	TCRBV02-01*01	TCRBD02-01*02	TCRBJ01-06*01
TCTCTGGAGCTGGGGGACTCAGCTTTGTATTTCTGTGCCAGCAGCCCCACTGCGACAGCTACGAACACTGAAGCTTTCTTTGGACAA	CASSPTATATNTEAFF	5	5.7464e-05	TCRBV09-01	TCRBD01-01*01	TCRBJ01-01*01
CTAAACCTGAGCTCTCTGGAGCTGGGGGACTCAGCTTTGTATTTCTGTGCCAGCAGCGCTTCGGCTCTCGGCTACACCTTCGGTTCG	CASSASALGYTF	5	5.7464e-05	TCRBV09-01		TCRBJ01-02*01
AGCTCTCTGGAGCTGGGGGACTCAGCTTTGTATTTCTGTGCCAGCAGCCCCAATTACTACGACACAGATACGCAGTATTTTGGCCCA	CASSPNYYDTDTQYF	5	5.7464e-05	TCRBV09-01	TCRBD02-01	TCRBJ02-03*01
AGCTCTCTGGAGCTGGGGGACTCAGCTTTGTATTTCTGTGCCAGCAGCGTAGAGTCTGGGAGAAACTATGGCTACACCTTCGGTTCG	CASSVESGRNYGYTF	5	5.7464e-05	TCRBV09-01	TCRBD02-01*02	TCRBJ01-02*01
TCTCTGGAGCTGGGGGACTCAGCTTTGTATTTCTGTGCCAGCAGCGTTGGGGAGGGTAGGGGTCAAGAGACCCAGTACTTCGGGCCA	CASSVGEGRGQETQYF	5	5.7464e-05	TCRBV09-01	TCRBD02-01*02	TCRBJ02-05*01
TCTGAACTAAACCTGAGCTCTCTGGAGCTGGGGGACTCAGCTTTGTATTTCTGTGCCAGCAGCGTAGAGACCCAGTACTTCGGGCCA	CASSVETQYF	5	5.7464e-05	TCRBV09-01		TCRBJ02-05*01
AGCTCTCTGGAGCTGGGGGACTCAGCTTTGTATTTCTGTGCCAGCAGCCCCCTATTTGAGGCAGCACCTGAGCAGTTCTTCGGGCCA	CASSPLFEAAPEQFF	5	5.7464e-05	TCRBV09-01	TCRBD02-01*02	TCRBJ02-01*01
CTGAGCTCTCTGGAGCTGGGGGACTCAGCTTTGTATTTCTGTGCCAGCAGCGTAGATGGGGCTAATCAGCCCCAGCATTTTGGTGAT	CASSVDGANQPQHF	5	5.7464e-05	TCRBV09-01	TCRBD01-01*01	TCRBJ01-05*01
CTGGAGCTGGGGGACTCAGCTTTGTATTTCTGTGCCAGCAGCGAGCCCCCGGGGGCAGGGGAGCAGAATGAGCAGTTCTTCGGGCCA	CASSEPPGAGEQNEQFF	5	5.7464e-05	TCRBV09-01		TCRBJ02-01*01
ATCCAGCCTGCAGAGCTTGGGGACTCGGCCATGTATCTCTGTGCCAGCAGCCGGACAGGGAATAATTCACCCCTCCACTTTGGGAAC	CASSRTGNNSPLHF	5	5.7464e-05	TCRBV11-01*01	TCRBD01-01*01	TCRBJ01-06*01
AATGTGAACGCCTTGGAGCTGGACGACTCGGCCCTGTATCTCTGTGCCAGCAGCTTGGAGCCCAATCAGCCCCAGCATTTTGGTGAT	CASSLEPNQPQHF	5	5.7464e-05	TCRBV05-04*01	TCRBD02-01	TCRBJ01-05*01
AATGTGAACGCCTTGGAGCTGGACGACTCGGCCCTGTATCTCTGTGCCAGCAGCTTGGGGTTGGCCGGGGAGCTGTTTTTTGGAGAA	CASSLGLAGELFF	5	5.7464e-05	TCRBV05-04*01		TCRBJ02-02*01
AATGTGAACGCCTTGGAGCTGGACGACTCGGCCCTGTATCTCTGTGCCAGCAGCTTTACAGGGGGAAACACCATATATTTTGGAGAG	CASSFTGGNTIYF	5	5.7464e-05	TCRBV05-04*01	TCRBD01-01*01	TCRBJ01-03*01
GAGTCGGCTGCTCCCTCCCAGACATCTGTGTACTTCTGTGCCAGCAGCGCCGGGGGGGCTGGAGGAGAGACCCAGTACTTCGGGCCA	CASSAGGAGGETQYF	5	5.7464e-05	TCRBV06-01*01	TCRBD02-01*01	TCRBJ02-05*01
CTCAGGCTGGAGTCGGCTGCTCCCTCCCAGACATCTGTGTACTTCTGTGCCAGCACGGGGCCTAACTATGGCTACACCTTCGGTTCG	CASTGPNYGYTF	5	5.7464e-05	TCRBV06-01*01		TCRBJ01-02*01
GAGTCGGCTGCTCCCTCCCAGACATCTGTGTACTTCTGTGCCAGCAGTGAGGGATGGGTAAGGAACACTGAAGCTTTCTTTGGACAA	CASSEGWVRNTEAFF	5	5.7464e-05	TCRBV06-01*01		TCRBJ01-01*01
GAGTCGGCTGCTCCCTCCCAGACATCTGTGTACTTCTGTGCCAGCAAAGGGGGCGATAAGGCCTACAATGAGCAGTTCTTCGGGCCA	CASKGGDKAYNEQFF	5	5.7464e-05	TCRBV06-01*01	TCRBD01-01*01	TCRBJ02-01*01
CTGGAGTCGGCTGCTCCCTCCCAGACATCTGTGTACTTCTGTGCCAGCAGTGAATATATGGGGGATAGGTCCCAGCATTTTGGTGAT	CASSEYMGDRSQHF	5	5.7464e-05	TCRBV06-01*01		TCRBJ01-05*01
CTCAGGCTGGAGTCGGCTGCTCCCTCCCAGACATCTGTGTACTTCTGTGCCGGGGCAACCCGGCCCGATACGCAGTATTTTGGCCCA	CAGATRPDTQYF	5	5.7464e-05	TCRBV06-01*01	TCRBD01-01*01	TCRBJ02-03*01
GAGTCGGCTGCTCCCTCCCAGACATCTGTGTACTTCTGTGCCAGCAGTCCCCGTAGAAGCTCTCAAGAGACCCAGTACTTCGGGCCA	CASSPRRSSQETQYF	5	5.7464e-05	TCRBV06-01*01	TCRBD02-01	TCRBJ02-05*01
ATCCAGCGCACAGAGCGGGGGGACTCAGCCGTGTATCTCTGTGCCAGCAGCCCTGACCCCGGGACAGGGAATGCTTTCTTTGGACAA	CASSPDPGTGNAFF	5	5.7464e-05	TCRBV07-03*01	TCRBD01-01*01	TCRBJ01-01*01
CAGGGGGACTCAGCCGTGTATCTCCGTGCCAGCAGCTCTGGGACGAGTAATCCGGCGGGATGCAAAAACATTCAGTACTTCGGCGCC	RASSSGTSNPAGCKNIQYF	5	5.7464e-05	TCRBV07-03*02	TCRBD02-01*02	TCRBJ02-04*01
CAGCGCACAGAGCGGGGGGACTCAGCCGTGTATCTCTGTGCCAGCAGCCCCGAGGCGGGGGCGAGAGAGACCCAGTACTTCGGGCCA	CASSPEAGARETQYF	5	5.7464e-05	TCRBV07-03*01	TCRBD02-01*01	TCRBJ02-05*01
ATCCAGCAGGTAGTGCGAGGAGATTCGGCAGCTTATTTCTGTGCCAGCTCACAACAGGGGAGGAACACTGAAGCTTTCTTTGGACAA	CASSQQGRNTEAFF	5	5.7464e-05	TCRBV18-01*01	TCRBD01-01*01	TCRBJ01-01*01
CTGGAGTCTGCTGCCTCCTCCCAGACATCTGTATATTTCTGCGCCAGCAGTTTGACAGGGACCACCGGGGAGCTGTTTTTTGGAGAA	CASSLTGTTGELFF	5	5.7464e-05	TCRBV10-01	TCRBD01-01*01	TCRBJ02-02*01
GAGTCTGCTGCCTCCTCCCAGACATCTGTATATTTCTGCGCCAGCAGTGAGTCTGGACAGGGGATCACTGAAGCTTTCTTTGGACAA	CASSESGQGITEAFF	5	5.7464e-05	TCRBV10-01	TCRBD01-01*01	TCRBJ01-01*01
TCTGCTGCCTCCTCCCAGACATCTGTATATTTCTGCGCCAGCAGTGATGTAGCGGCTCAGAACACCGGGGAGCTGTTTTTTGGAGAA	CASSDVAAQNTGELFF	5	5.7464e-05	TCRBV10-01	TCRBD02-01	TCRBJ02-02*01
CTGGAGTCTGCTGCCTCCTCCCAGACATCTGTATATTTCTGCGCCAGCAGCTTGGGGGGGGACCCAGATACGCAGTATTTTGGCCCA	CASSLGGDPDTQYF	5	5.7464e-05	TCRBV10-01	TCRBD02-01*01	TCRBJ02-03*01
CTGTCGGCTGCTCCCTCCCAGACATCTGTGTACTTCTGTGCCAGCAGTCGAACAGGGGGCTCTGGAAACACCATATATTTTGGAGAG	CASSRTGGSGNTIYF	5	5.7464e-05	TCRBV06-05*01	TCRBD01-01*01	TCRBJ01-03*01
AGGCTGGAGTTGGCTGCTCCCTCCCAGACATCTGTGTACTTCTGTGCCAGCAGCCCGGGATCAGGCGTTGAGCAGTTCTTCGGGCCA	CASSPGSGVEQFF	5	5.7464e-05	TCRBV06-06	TCRBD02-01*02	TCRBJ02-01*01
AGGCTGGAGTTGGCTGCTCCCTCCCAGACATCTGTGTACTTCTGTGCCAGCAGCCTGGCGGGGATAGGTACGCAGTATTTTGGCCCA	CASSLAGIGTQYF	5	5.7464e-05	TCRBV06-06	TCRBD02-01*01	TCRBJ02-03*01
TTGGCTGCTCCCTCCCAGACATCTGTGTACTTCTGTGCCAGCAGGTCACTCGGGGGTAGAAGCACAGATACGCAGTATTTTGGCCCA	CASRSLGGRSTDTQYF	5	5.7464e-05	TCRBV06-06	TCRBD02-01*01	TCRBJ02-03*01
AGGCTGGAGTTGGCTGCTCCCTCCCAGACATCTGTGTACTTCTGTGCCACCCAGGCCAGTGATACCGGGGAGCTGTTTTTTGGAGAA	CATQASDTGELFF	5	5.7464e-05	TCRBV06-06	TCRBD01-01*01	TCRBJ02-02*01
TTGGCTGCTCCCTCCCAGACATCTGTGTACTTCTGTGCCAGCAGTTACCGTATACTCCAGAAGCCCGGGGAGCTGTTTTTTGGAGAA	CASSYRILQKPGELFF	5	5.7464e-05	TCRBV06-06		TCRBJ02-02*01
ATCCGGTCCACAAAGCTGGAGGACTCAGCCATGTACTTCTGTGCCAGCAGCAATCTGAATAGCAATCAGCCCCAGCATTTTGGTGAT	CASSNLNSNQPQHF	5	5.7464e-05	TCRBV02-01*01		TCRBJ01-05*01
ATCCGGTCCACAAAGCTGGAGGACTCAGCCATGTACTTCTGTGCCAGCAGAGATCGAACAGGGGTATACGAGCAGTACTTCGGGCCG	CASRDRTGVYEQYF	5	5.7464e-05	TCRBV02-01*01	TCRBD01-01*01	TCRBJ02-07*01
AAGATCCGGTCCACAAAGCTGGAGGACTCAGCCATGTACTTCTGTGCCAGCACAGGACAGGCTAATGAAAAACTGTTTTTTGGCAGT	CASTGQANEKLFF	5	5.7464e-05	TCRBV02-01*01	TCRBD01-01*01	TCRBJ01-04*01
AAGATCCGGTCCACAAAGCTGGAGGACTCAGCCATGTACTTCTGTGCCAGCAGTGGCCCATTTAGCACTGAAGCTTTCTTTGGACAA	CASSGPFSTEAFF	5	5.7464e-05	TCRBV02-01*01	TCRBD02-01	TCRBJ01-01*01
ACAAAGCTGGAGGACTCAGCCATGTACTTCTGTGCCAGCAATGACAAGACAGAGGCCACAACTAATGAAAAACTGTTTTTTGGCAGT	CASNDKTEATTNEKLFF	5	5.7464e-05	TCRBV02-01*01	TCRBD01-01*01	TCRBJ01-04*01
CGGTCCACAAAGCTGGAGGACTCAGCCATGTACTTCTGTGCCAGCAGTGAAGCCGGTCGGGGGCCCTATGGCTACACCTTCGGTTCG	CASSEAGRGPYGYTF	5	5.7464e-05	TCRBV02-01*01		TCRBJ01-02*01
CGGTCCACAAAGCTGGAGGACTCAGCCATGTACTTCTGTGCCAGCAGTGAGGGCAGAACCCCGGACTACGAGCAGTACTTCGGGCCG	CASSEGRTPDYEQYF	5	5.7464e-05	TCRBV02-01*01	TCRBD01-01*01	TCRBJ02-07*01
CGGTCCACAAAGCTGGAGGACTCAGCCATGTACTTCTGTGCCAGCAGTGGACTAGCGGGGGGACAAGAGACCCAGTACTTCGGGCCA	CASSGLAGGQETQYF	5	5.7464e-05	TCRBV02-01*01	TCRBD02-01*01	TCRBJ02-05*01
TCCACAAAGCTGGAGGACTCAGCCATGTACTTCTGTGCCAGCTCTCTGGCCGGGACACTGACTTCAAACATTCAGTACTTCGGCGCC	CASSLAGTLTSNIQYF	5	5.7464e-05	TCRBV02-01*01	TCRBD01-01*01	TCRBJ02-04*01
AAGATCCGGTCCACAAAGCTGGAGGACTCAGCCATGTACTTCTGTGCCAGCAGTGAATTGGGCACAGATACGCAGTATTTTGGCCCA	CASSELGTDTQYF	5	5.7464e-05	TCRBV02-01*01		TCRBJ02-03*01
CGGTCCACAAAGCTGGAGGACTCAGCCATGTACTTCTGTGCCAGCAGAGGGCTAGGGGGGCGATACAATGAGCAGTTCTTCGGGCCA	CASRGLGGRYNEQFF	5	5.7464e-05	TCRBV02-01*01		TCRBJ02-01*01
ATCCGGTCCACAAAGCTGGAGGACTCAGCCATGTACTTCTGTGCCAGCAGAGCAGGACTAGCGGGGGGGGAGCAGTACTTCGGGCCG	CASRAGLAGGEQYF	5	5.7464e-05	TCRBV02-01*01	TCRBD02-01*01	TCRBJ02-07*01
TCCACAAAGCTGGAGGACTCAGCCATGTACTTCTGTGCCAGCAGTAGCCAGGCGGGGACAGCCTCCTACGAGCAGTACTTCGGGCCG	CASSSQAGTASYEQYF	5	5.7464e-05	TCRBV02-01*01	TCRBD01-01*01	TCRBJ02-07*01
CGGTCCACAAAGCTGGAGGACTCAGCCATGTACTTCTGTGCCAGCAGTAGAGAGGGGGTCTCCTACAATGAGCAGTTCTTCGGGCCA	CASSREGVSYNEQFF	5	5.7464e-05	TCRBV02-01*01	TCRBD01-01*01	TCRBJ02-01*01
CCTGCAGAACTGGAGGATTCTGGAGTTTATTTCTGTGCCAGCAGCCAAGACCCGGGACGGAGCCACTATGGCTACACCTTCGGTTCG	CASSQDPGRSHYGYTF	5	5.7464e-05	TCRBV14-01*01		TCRBJ01-02*01
CTGAAGGTGCAGCCTGCAGAACTGGAGGATTCTGGAGTTTATTTCTGTGCCAGCAGCCAAGTGGGAAACACCATATATTTTGGAGAG	CASSQVGNTIYF	5	5.7464e-05	TCRBV14-01*01		TCRBJ01-03*01
GTGCAGCCTGCAGAACTGGAGGATTCTGGAGTTTATTTCTGTGCCAGCAGCTCCCTGGGAGGGGCTAGCGGCTACACCTTCGGTTCG	CASSSLGGASGYTF	5	5.7464e-05	TCRBV14-01*01	TCRBD02-01*02	TCRBJ01-02*01
ACCTTGGAGCTGGGGGACTCGGCCCTTTATCTTTGCGCCAGCAGCCTCGGCGACAGTTACTCTGGAAACACCATATATTTTGGAGAG	CASSLGDSYSGNTIYF	5	5.7464e-05	TCRBV05-01*01	TCRBD01-01*01	TCRBJ01-03*01
AGCACCTTGGAGCTGGGGGACTCGGCCCTTTATCTTTGCGCCAGCAGGGGGGGAGTCGCAACTAATGAAAAACTGTTTTTTGGCAGT	CASRGGVATNEKLFF	5	5.7464e-05	TCRBV05-01*01	TCRBD02-01*01	TCRBJ01-04*01
AATGTGAGCACCTTGGAGCTGGGGGACTCGGCCCTTTATCTTTGCGCCAGCAGCTTAGGGGGCAATCAGCCCCAGCATTTTGGTGAT	CASSLGGNQPQHF	5	5.7464e-05	TCRBV05-01*01	TCRBD01-01*01	TCRBJ01-05*01
GTGAACGCCTTGGAGCTGGACGACTCGGCCCTGTATCTCTGTGCCAGCAGCTTGGCCTTTCGAGGGAATGGCTACACCTTCGGTTCG	CASSLAFRGNGYTF	5	5.7464e-05	TCRBV05-04*01	TCRBD02-01*02	TCRBJ01-02*01
CAGCGCACACAGCAGGAGGACTCCGCCGTGTATCTCTGTGCCAGCAGCTTGAACGGAGATACTAATTCACCCCTCCACTTTGGGAAC	CASSLNGDTNSPLHF	5	5.7464e-05	TCRBV07-08*01	TCRBD02-01*02	TCRBJ01-06*01
AAGATCCAGCGCACACAGCAGGAGGACTCCGCCGTGTATCTCTGTGCCAGCAGCCCCGAGAGCTCCTACGAGCAGTACTTCGGGCCG	CASSPESSYEQYF	5	5.7464e-05	TCRBV07-08*01	TCRBD02-01*02	TCRBJ02-07*01
CAGCGCACACAGCAGGAGGACTCCGCCGTGTATCTCTGTGCCAGCAGCTTTGCTAGCGGGGGGCAAGATACGCAGTATTTTGGCCCA	CASSFASGGQDTQYF	5	5.7464e-05	TCRBV07-08*01	TCRBD02-01*01	TCRBJ02-03*01
ACACAGCAGGAGGACTCCGCCGTGTATCTCTGTGCCAGCAGCTTAACGCCTAGCGGGACAGGCAATGAAAAACTGTTTTTTGGCAGT	CASSLTPSGTGNEKLFF	5	5.7464e-05	TCRBV07-08*01	TCRBD02-01*02	TCRBJ01-04*01
CAGCGCACACAGCAGGAGGACTCCGCCGTGTATCTCTGTGCCAGCAGCTTTGCCGTGAACGGAAATTCACCCCTCCACTTTGGGAAC	CASSFAVNGNSPLHF	5	5.7464e-05	TCRBV07-08*01		TCRBJ01-06*01
ATCCAGCAGGTAGTGCGAGGAGATTCGGCAGCTTATTTCTGTGCCAGCTCACCACCGGCCAGATCCTACGAGCAGTACTTCGGGCCG	CASSPPARSYEQYF	5	5.7464e-05	TCRBV18-01*01	TCRBD01-01*01	TCRBJ02-07*01
AGGATCCAGCAGGTAGTGCGAGGAGATTCGGCAGCTTATTTCTGTGCCAGCTCACCTCTCCTGGACCGCGAAGCTTTCTTTGGACAA	CASSPLLDREAFF	5	5.7464e-05	TCRBV18-01*01		TCRBJ01-01*01
ATCCAGCAGGTAGTGCGAGGAGATTCGGCAGCTTATTTCTGTGCCAGCTCACCAAAACAGAGGAACACTGAAGCTTTCTTTGGACAA	CASSPKQRNTEAFF	5	5.7464e-05	TCRBV18-01*01	TCRBD01-01*01	TCRBJ01-01*01
GTAGTGCGAGGAGATTCGGCAGCTTATTTCTGTGCCAGCTCACTACTAGCCCAGGGCGCGGCTAACTATGGCTACACCTTCGGTTCG	CASSLLAQGAANYGYTF	5	5.7464e-05	TCRBV18-01*01	TCRBD02-01	TCRBJ01-02*01
CCGCTCAGGCTGCTGTCGGCTGCTCCCTCCCAGACATCTGTGTACTTCTGTGCCACCCTGTTTTTCGGGGAGCTGTTTTTTGGAGAA	CATLFFGELFF	5	5.7464e-05	TCRBV06-05*01	TCRBD02-01	TCRBJ02-02*01
CTGCTGTCGGCTGCTCCCTCCCAGACATCTGTGTACTTCTGTGCCAGCAGGAGGGACGGAAGCTCCTACGAGCAGTACTTCGGGCCG	CASRRDGSSYEQYF	5	5.7464e-05	TCRBV06-05*01		TCRBJ02-07*01
CTCAGGCTGCTGTCGGCTGCTCCCTCCCAGACATCTGTGTACTTCTGTGCCAGCAGTCAATTGGAGGCTCCCCTCCACTTTGGGAAC	CASSQLEAPLHF	5	5.7464e-05	TCRBV06-05*01	TCRBD02-01*02	TCRBJ01-06*01
CTGCTGTCGGCTGCTCCCTCCCAGACATCTGTGTACTTCTGTGCCAGCAGTACCGGGACAGGGGGGTTCGGGCAGTACTTCGGGCCG	CASSTGTGGFGQYF	5	5.7464e-05	TCRBV06-05*01	TCRBD01-01*01	TCRBJ02-07*01
AGGCTGCTGTCGGCTGCTCCCTCCCAGACATCTGTGTACTTCTGTGCCAGCGAGGGAGCAGGGCCCGGGGAGCTGTTTTTTGGAGAA	CASEGAGPGELFF	5	5.7464e-05	TCRBV06-05*01		TCRBJ02-02*01
CTGCTGTCGGCTGCTCCCTCCCAGACATCTGTGTACTTCTGTGCCAGCACCAACGGACGGCGGCACACTGAAGCTTTCTTTGGACAA	CASTNGRRHTEAFF	5	5.7464e-05	TCRBV06-05*01		TCRBJ01-01*01
ACCTTGGAGATCCAGCGCACAGAGCAGGGGGACTCGGCCATGTATCTCTGTGCCAGCAGGGGTGGCACTGAAGCTTTCTTTGGACAA	CASRGGTEAFF	5	5.7464e-05	TCRBV07-09		TCRBJ01-01*01
ATCCAGCGCACAGAGCAGGGGGACTCGGCCATGTATCTCTGTGCCAGCAGCTTATCCAGGTTGAACACTGAAGCTTTCTTTGGACAA	CASSLSRLNTEAFF	5	5.7464e-05	TCRBV07-09	TCRBD01-01*01	TCRBJ01-01*01
CGGTCCACAAAGCTGGAGGACTCAGCCATGTACTTCTGTGCCAGCAGTGTGGGACTAGCGAGCACAGATACGCAGTATTTTGGCCCA	CASSVGLASTDTQYF	5	5.7464e-05	TCRBV02-01*01	TCRBD02-01	TCRBJ02-03*01
CTGAAGATCCGGTCCACAAAGCTGGAGGACTCAGCCATGTACTTCTGTGCCAGATCCCGGGACAGAGGGGGCTACACCTTCGGTTCG	CARSRDRGGYTF	5	5.7464e-05	TCRBV02-01*01	TCRBD01-01*01	TCRBJ01-02*01
CGGTCCACAAAGCTGGAGGACTCAGCCATGTACTTCTGTGCCAGCGAAACGGCTCCGGGGGCGGGTTATGGCTACACCTTCGGTTCG	CASETAPGAGYGYTF	5	5.7464e-05	TCRBV02-01*01		TCRBJ01-02*01
AAGATCCGGTCCACAAAGCTGGAGGACTCAGCCATGTACTTCTGTGCCAGCGCGACACTGAACACCGGGGAGCTGTTTTTTGGAGAA	CASATLNTGELFF	5	5.7464e-05	TCRBV02-01*01	TCRBD01-01*01	TCRBJ02-02*01
CGGTCCACAAAGCTGGAGGACTCAGCCATGTACTTCTGTGCCAGCAGCAGACAGGGAGGGGGGGACACTGAAGCTTTCTTTGGACAA	CASSRQGGGDTEAFF	5	5.7464e-05	TCRBV02-01*01		TCRBJ01-01*01
GCGTCTGCTGTACCCTCTCAGACATCTGTGTACTTCTGTGCCAGCAGTGTAAAAGCGGGGGACTACAATGAGCAGTTCTTCGGGCCA	CASSVKAGDYNEQFF	5	5.7464e-05	TCRBV06-04	TCRBD02-01*01	TCRBJ02-01*01
GCGTCTGCTGTACCCTCTCAGACATCTGTGTACTTCTGTGCCAGCAGTGCAGGGGGCATCCATAATTCACCCCTCCACTTTGGGAAC	CASSAGGIHNSPLHF	5	5.7464e-05	TCRBV06-04	TCRBD01-01*01	TCRBJ01-06*01
ACGTTGGCGTCTGCTGTACCCTCTCAGACATCTGTGTACTTCTGTGCCAGCAGTGACTCGACAAATTCACCCCTCCACTTTGGGAAC	CASSDSTNSPLHF	5	5.7464e-05	TCRBV06-04	TCRBD01-01*01	TCRBJ01-06*01
TTGGCGTCTGCTGTACCCTCTCAGACATCTGTGTACTTCTGTGCCAGCAGTAGATCGCCGGGAAATTCACCCCTCCACTTTGGGAAC	CASSRSPGNSPLHF	5	5.7464e-05	TCRBV06-04	TCRBD02-01*02	TCRBJ01-06*01
GCGTCTGCTGTACCCTCTCAGACATCTGTGTACTTCTGTGCCAGCAGTGACTCAGCGGGGGGCACAGATACGCAGTATTTTGGCCCA	CASSDSAGGTDTQYF	5	5.7464e-05	TCRBV06-04	TCRBD02-01*01	TCRBJ02-03*01
ACGTTGGCGTCTGCTGTACCCTCTCAGACATCTGTGTACTTCTGTGCCAGCAGTGGACAGGGTACTCAGCCCCAGCATTTTGGTGAT	CASSGQGTQPQHF	5	5.7464e-05	TCRBV06-04	TCRBD01-01*01	TCRBJ01-05*01
GCGTCTGCTGTACCCTCTCAGACATCTGTGTACTTCTGTGCCAGCAGTGACTCAAACGGGACCCCAGATACGCAGTATTTTGGCCCA	CASSDSNGTPDTQYF	5	5.7464e-05	TCRBV06-04		TCRBJ02-03*01
TCTGCTGTACCCTCTCAGACATCTGTGTACTTCTGTGCCAGCAGTGACTCGCTCGGGGGGGATTACAATGAGCAGTTCTTCGGGCCA	CASSDSLGGDYNEQFF	5	5.7464e-05	TCRBV06-04	TCRBD02-01*01	TCRBJ02-01*01
GAGATGAATGTGAGCACCTTGGAGCTGGGGGACTCGGCCCTTTATCTTTGCGCCAGCAGACTGACAGATACGCAGTATTTTGGCCCA	CASRLTDTQYF	5	5.7464e-05	TCRBV05-01*01	TCRBD02-01	TCRBJ02-03*01
AATGTGAGCACCTTGGAGCTGGGGGACTCGGCCCTTTATCTTTGCGCCAGCAGCTCGACACAGCGCTATGGCTACACCTTCGGTTCG	CASSSTQRYGYTF	5	5.7464e-05	TCRBV05-01*01		TCRBJ01-02*01
AATGTGAGCACCTTGGAGCTGGGGGACTCGGCCCTTTATCTTTGCGCCAGCAGCTTGGAGGGGCGCTATGGCTACACCTTCGGTTCG	CASSLEGRYGYTF	5	5.7464e-05	TCRBV05-01*01	TCRBD01-01*01	TCRBJ01-02*01
AGCACCTTGGAGCTGGGGGACTCGGCCCTTTATCTTTGCGCCAGCAGCCACGGGACTAGCTCCACAGATACGCAGTATTTTGGCCCA	CASSHGTSSTDTQYF	5	5.7464e-05	TCRBV05-01*01	TCRBD02-01	TCRBJ02-03*01
GAGCTGGGGGACTCGGCCCTTTATCTTTGCGCCAGCAGCCCCCACCGCGGGGCGGGCAACTCTCAAGAGACCCAGTACTTCGGGCCA	CASSPHRGAGNSQETQYF	5	5.7464e-05	TCRBV05-01*01	TCRBD02-01*01	TCRBJ02-05*01
ACCTTGGAGCTGGGGGACTCGGCCCTTTATCTTTGCGCCACCTCTAGCGGGGGGGCTATTAGGGCAGATACGCAGTATTTTGGCCCA	CATSSGGAIRADTQYF	5	5.7464e-05	TCRBV05-01*01	TCRBD02-01*01	TCRBJ02-03*01
GAGGACTCCGCCGTGTATCTCTGTGCCAGCAGCCCACCGCCCGGGACTAGCGGGGGGTCTAGCACAGATACGCAGTATTTTGGCCCA	CASSPPPGTSGGSSTDTQYF	5	5.7464e-05	TCRBV07-08	TCRBD02-01*01	TCRBJ02-03*01
CTGAAGATCCAGCGCACACAGCAGGAGGACTCCGCCGTGTATCTCTGTGCCAGCAGCCCCCGTAGCTATGGCTACACCTTCGGTTCG	CASSPRSYGYTF	5	5.7464e-05	TCRBV07-08*01	TCRBD02-01	TCRBJ01-02*01
GAGTCAGCTACCCGCTCCCAGACATCTGTGTATTTCTGCGCCAGCAGAAGGTCGCCCACTAGCACAGATACGCAGTATTTTGGCCCA	CASRRSPTSTDTQYF	5	5.7464e-05	TCRBV10-02*01		TCRBJ02-03*01
GAGTCAGCTACCCGCTCCCAGACATCTGTGTATTTCTGCGCCAGCAGTCCCCGAGCGGGGAGGACCGGGGAGCTGTTTTTTGGAGAA	CASSPRAGRTGELFF	5	5.7464e-05	TCRBV10-02*01	TCRBD02-01*01	TCRBJ02-02*01
ACTCTGGAGTCAGCTACCCGCTCCCAGACATCTGTGTATTTCTGCGCCAGCACCTTGACAGGGGGTCAGCCCCAGCATTTTGGTGAT	CASTLTGGQPQHF	5	5.7464e-05	TCRBV10-02*01	TCRBD01-01*01	TCRBJ01-05*01
ACTCTGGAGTCAGCTACCCGCTCCCAGACATCTGTGTATTTCTGCGCCAGCAGGACAAAACAGGGCGGTGAGCAGTACTTCGGGCCG	CASRTKQGGEQYF	5	5.7464e-05	TCRBV10-02*01	TCRBD01-01*01	TCRBJ02-07*01
AGGATCCAGCAGGTAGTGCGAGGAGATTCGGCAGCTTATTTCTGTGCCAGCTCACCACACCCAGGGCGCGGCTACACCTTCGGTTCG	CASSPHPGRGYTF	5	5.7464e-05	TCRBV18-01*01	TCRBD01-01*01	TCRBJ01-02*01
CTGAGGATCCAGCAGGTAGTGCGAGGAGATTCGGCAGCTTATTTCTGTGCCAGCTCACGAGGGGTCGGGGAGCTGTTTTTTGGAGAA	CASSRGVGELFF	5	5.7464e-05	TCRBV18-01*01		TCRBJ02-02*01
CAGCAGGTAGTGCGAGGAGATTCGGCAGCTTATTTCTGTGCCAGCTCACAACGGGGAGTCTCTGGAAACACCATATATTTTGGAGAG	CASSQRGVSGNTIYF	5	5.7464e-05	TCRBV18-01*01	TCRBD02-01	TCRBJ01-03*01
ATCCAGCAGGTAGTGCGAGGAGATTCGGCAGCTTATTTCTGTGCCAGCTCCCCCGGGACAGGGTACTACGAGCAGTACTTCGGGCCG	CASSPGTGYYEQYF	5	5.7464e-05	TCRBV18-01*01	TCRBD01-01*01	TCRBJ02-07*01
CTGCTGTCGGCTGCTCCCTCCCAGACATCTGTGTACTTCTGTGCCAGCAGCTCCGGGACAGGGATTTCACCCCTCCACTTTGGGAAC	CASSSGTGISPLHF	5	5.7464e-05	TCRBV06-05*01	TCRBD01-01*01	TCRBJ01-06*01
CTGCTGTCGGCTGCTCCCTCCCAGACATCTGTGTACTTCTGTGCCAGCAGTGAGACCCCGGACACCGGGGAGCTGTTTTTTGGAGAA	CASSETPDTGELFF	5	5.7464e-05	TCRBV06-05*01		TCRBJ02-02*01
AGGCTGCTGTCGGCTGCTCCCTCCCAGACATCTGTGTACTTCTGTGCCGTCAAGCGTGATACGAACACTGAAGCTTTCTTTGGACAA	CAVKRDTNTEAFF	5	5.7464e-05	TCRBV06-05*01	TCRBD02-01	TCRBJ01-01*01
AGGCTGCTGTCGGCTGCTCCCTCCCAGACATCTGTGTACTTCTGTGCCAGCAGTTACTATCAGGGTACTGAAGCTTTCTTTGGACAA	CASSYYQGTEAFF	5	5.7464e-05	TCRBV06-05*01	TCRBD01-01*01	TCRBJ01-01*01
CTGTCGGCTGCTCCCTCCCAGACATCTGTGTACTTCTGTGCCAGCAGGGACAGTTCTCTTATGAACACTGAAGCTTTCTTTGGACAA	CASRDSSLMNTEAFF	5	5.7464e-05	TCRBV06-05*01	TCRBD01-01*01	TCRBJ01-01*01
CTGCTGTCGGCTGCTCCCTCCCAGACATCTGTGTACTTCTGTGCCAACAGGAGAGGGACGTCTAACTATGGCTACACCTTCGGTTCG	CANRRGTSNYGYTF	5	5.7464e-05	TCRBV06-05*01		TCRBJ01-02*01
CTGTCGGCTGCTCCCTCCCAGACATCTGTGTACTTCTGTGCCAGCAGTCCCCGGACAGGGGCTAACTATGGCTACACCTTCGGTTCG	CASSPRTGANYGYTF	5	5.7464e-05	TCRBV06-05*01	TCRBD01-01*01	TCRBJ01-02*01
CTCAGGCTGCTGTCGGCTGCTCCCTCCCAGACATCTGTGTACTTCTGTGCCACCGAACAAGACACCGGGGAGCTGTTTTTTGGAGAA	CATEQDTGELFF	5	5.7464e-05	TCRBV06-05*01	TCRBD01-01*01	TCRBJ02-02*01
CTGCTGTCGGCTGCTCCCTCCCAGACATCTGTGTACTTCTGTGCCAGCAGTTCCCCAGACTTAACAAGGACGCAGTATTTTGGCCCA	CASSSPDLTRTQYF	5	5.7464e-05	TCRBV06-05*01	TCRBD02-01	TCRBJ02-03*01
AGGCTGCTGTCGGCTGCTCCCTCCCAGACATCTGTGTACTTCTGTGCCAGCATGGGCAGTTCTAATGAAAAACTGTTTTTTGGCAGT	CASMGSSNEKLFF	5	5.7464e-05	TCRBV06-05*01	TCRBD01-01*01	TCRBJ01-04*01
CTCAGGCTGCTGTCGGCTGCTCCCTCCCAGACATCTGTGTACTTCTGTGCCAGCAGTTCCGGGGCTGGTGGCTACACCTTCGGTTCG	CASSSGAGGYTF	5	5.7464e-05	TCRBV06-05*01		TCRBJ01-02*01
TCGGCTGCTCCCTCCCAGACATCTGTGTACTTCTGTGCCAGCAGTTACATACGGACAGGGGGCGGCTATGGCTACACCTTCGGTTCG	CASSYIRTGGGYGYTF	5	5.7464e-05	TCRBV06-05*01	TCRBD01-01*01	TCRBJ01-02*01
CTGTCGGCTGCTCCCTCCCAGACATCTGTGTACTTCTGTGCCAGCAGTTACTCGTGGTCTGGTTCCTACGAGCAGTACTTCGGGCCG	CASSYSWSGSYEQYF	5	5.7464e-05	TCRBV06-05*01		TCRBJ02-07*01
AGGCTGCTGTCGGCTGCTCCCTCCCAGACATCTGTGTACTTCTGTGCCAGCAGTTACTGGGAGGGCACTGAAGCTTTCTTTGGACAA	CASSYWEGTEAFF	5	5.7464e-05	TCRBV06-05*01	TCRBD02-01*02	TCRBJ01-01*01
GAGATCCAGCGCACAGAGCAGGGGGACTCGGCCATGTATCTCTGTGCCAGCAAGGGAACAGCTAATGAAAAACTGTTTTTTGGCAGT	CASKGTANEKLFF	5	5.7464e-05	TCRBV07-09		TCRBJ01-04*01
GAGATCCAGCGCACAGAGCAGGGGGACTCGGCCATGTATCTCTGTGCCAGCAGCCTCGGTCGGAACACTGAAGCTTTCTTTGGACAA	CASSLGRNTEAFF	5	5.7464e-05	TCRBV07-09	TCRBD02-01	TCRBJ01-01*01
ATCCAGCGCACAGAGCAGGGGGACTCGGCCATGTATCTCTGTGCCAGCAGTGAGCCAGGGAAGAACACTGAAGCTTTCTTTGGACAA	CASSEPGKNTEAFF	5	5.7464e-05	TCRBV07-09	TCRBD01-01*01	TCRBJ01-01*01
GAGATCCAGCGCACAGAGCAGGGGGACTCGGCCATGTATCTCTGTGCCAGCAGCTTACAGGGACCCACTGAAGCTTTCTTTGGACAA	CASSLQGPTEAFF	5	5.7464e-05	TCRBV07-09		TCRBJ01-01*01
ATCCAGCGCACAGAGCAGGGGGACTCGGCCATGTATCTCTGTGCCAGCAGCCCGACAGGTCGGGCCTACGAGCAGTACTTCGGGCCG	CASSPTGRAYEQYF	5	5.7464e-05	TCRBV07-09	TCRBD01-01*01	TCRBJ02-07*01
CAGCGCACAGAGCAGGGGGACTCGGCCATGTATCTCTGTGCCAGCAGCTTTCGAGGGCAAGCTAATGAAAAACTGTTTTTTGGCAGT	CASSFRGQANEKLFF	5	5.7464e-05	TCRBV07-09	TCRBD02-01*02	TCRBJ01-04*01
CGCACAGAGCAGGGGGACTCGGCCATGTATCTCTGTGCCAGCACCCCGCCTGGGACAGGGGTCATCGAGACCCAGTACTTCGGGCCA	CASTPPGTGVIETQYF	5	5.7464e-05	TCRBV07-09	TCRBD01-01*01	TCRBJ02-05*01
GAGATCCAGCGCACAGAGCAGGGGGACTCGGCCATGTATCTCTGTGCCAGCAGCCGGGCGGTTCCCTACGAGCAGTACTTCGGGCCG	CASSRAVPYEQYF	5	5.7464e-05	TCRBV07-09		TCRBJ02-07*01
GAGCAGGGGGACTCGGCCATGTATCTCTGTGCCAGCAGCTCAACGTACTACACCCCCCGAGCGGTCTATGGCTACACCTTCGGTTCG	CASSSTYYTPRAVYGYTF	5	5.7464e-05	TCRBV07-09	TCRBD02-01	TCRBJ01-02*01
ACCTTGGAGCTGGGGGACTCGGCCCTTTATCTTTGCGCCAGCAGCTTGGGGGACACCTTCTCTGGAAACACCATATATTTTGGAGAG	CASSLGDTFSGNTIYF	5	5.7464e-05	TCRBV05-01*01	TCRBD01-01*01	TCRBJ01-03*01
GTGAGCACCTTGGAGCTGGGGGACTCGGCCCTTTATCTTTGCGCCAGCAGCATAGGGGGGTGGAACACTGAAGCTTTCTTTGGACAA	CASSIGGWNTEAFF	5	5.7464e-05	TCRBV05-01*01		TCRBJ01-01*01
TTGGAGCTGGGGGACTCGGCCCTTTATCTTTGCGCCAGCAGCTTGGCCCCTACAGGAAGCTCCTACAATGAGCAGTTCTTCGGGCCA	CASSLAPTGSSYNEQFF	5	5.7464e-05	TCRBV05-01*01	TCRBD01-01*01	TCRBJ02-01*01
GTGAGCACCTTGGAGCTGGGGGACTCGGCCCTTTATCTTTGCGCCAGCAGCCTCGGGTTTCGGGAGGAAAAACTGTTTTTTGGCAGT	CASSLGFREEKLFF	5	5.7464e-05	TCRBV05-01*01	TCRBD02-01*02	TCRBJ01-04*01
ATGAATGTGAGCACCTTGGAGCTGGGGGACTCGGCCCTTTATCTTTGCGCCAGCAGGGTTAACACAGATACGCAGTATTTTGGCCCA	CASRVNTDTQYF	5	5.7464e-05	TCRBV05-01*01		TCRBJ02-03*01
AGCACCTTGGAGCTGGGGGACTCGGCCCTTTATCTTTGCGCCAGCAGCCGCGGTGGAGACCTTACCTCCGAGCAGTACTTCGGGCCG	CASSRGGDLTSEQYF	5	5.7464e-05	TCRBV05-01*01	TCRBD02-01	TCRBJ02-07*01
GTGAGCACCTTGGAGCTGGGGGACTCGGCCCTTTATCTTTGCGCCAGCAGCTTGGCCACGTTTGGGACTGAAGCTTTCTTTGGACAA	CASSLATFGTEAFF	5	5.7464e-05	TCRBV05-01*01		TCRBJ01-01*01
ACCTTGGAGCTGGGGGACTCGGCCCTTTATCTTTGCGCCAGCAGCTTGGTTCCAGCGGGGCTACAAGAGACCCAGTACTTCGGGCCA	CASSLVPAGLQETQYF	5	5.7464e-05	TCRBV05-01*01	TCRBD02-01*01	TCRBJ02-05*01
GTGAGCACCTTGGAGCTGGGGGACTCGGCCCTTTATCTTTGCGCCAGCAGCTTGGCCGTCGACCACAATGAGCAGTTCTTCGGGCCA	CASSLAVDHNEQFF	5	5.7464e-05	TCRBV05-01*01		TCRBJ02-01*01
AGCACCTTGGAGCTGGGGGACTCGGCCCTTTATCTTTGCGCCAGCAGCTTGTGGGGACAGGAGGTCACTGAAGCTTTCTTTGGACAA	CASSLWGQEVTEAFF	5	5.7464e-05	TCRBV05-01*01	TCRBD01-01*01	TCRBJ01-01*01
AGCACCTTGGAGCTGGGGGACTCGGCCCTTTATCTTTGCGCCAGCAGCTTGTCCGGAGGGCTGGGAACTGAAGCTTTCTTTGGACAA	CASSLSGGLGTEAFF	5	5.7464e-05	TCRBV05-01*01	TCRBD02-01*02	TCRBJ01-01*01
ACCTTGGAGCTGGGGGACTCGGCCCTTTATCTTTGCGCCAGCAGCGTAGGACTAGCGGGGGCCGTCGATGAGCAGTTCTTCGGGCCA	CASSVGLAGAVDEQFF	5	5.7464e-05	TCRBV05-01*01	TCRBD02-01*01	TCRBJ02-01*01
ACCTTGGAGCTGGGGGACTCGGCCCTTTATCTTTGCGCCAGCAGCTTGGCCCCCCAGGGTATGAACACTGAAGCTTTCTTTGGACAA	CASSLAPQGMNTEAFF	5	5.7464e-05	TCRBV05-01*01	TCRBD01-01*01	TCRBJ01-01*01
AGCACCTTGGAGCTGGGGGACTCGGCCCTTTATCTTTGCGCCAGCAGCTTTGGGTCCCTTGCGAACTATGGCTACACCTTCGGTTCG	CASSFGSLANYGYTF	5	5.7464e-05	TCRBV05-01*01		TCRBJ01-02*01
ACCTTGGAGCTGGGGGACTCGGCCCTTTATCTTTGCGCCAGCAGCCCCGACAGGGTAGAATCTGGAAACACCATATATTTTGGAGAG	CASSPDRVESGNTIYF	5	5.7464e-05	TCRBV05-01*01	TCRBD01-01*01	TCRBJ01-03*01
GTGAGCACCTTGGAGCTGGGGGACTCGGCCCTTTATCTTTGCGCCAGCAGCCCACCGAGTACGCGCGACGAGCAGTACTTCGGGCCG	CASSPPSTRDEQYF	5	5.7464e-05	TCRBV05-01*01	TCRBD02-01	TCRBJ02-07*01
GAGTCCGCCAGCACCAACCAGACATCTATGTACCTCTGTGCCAGCAGGCACGGACTAGCGGGGAGTCACGAGCAGTACTTCGGGCCG	CASRHGLAGSHEQYF	5	5.7464e-05	TCRBV28-01*01	TCRBD02-01*01	TCRBJ02-07*01
ACCAACCAGACATCTATGTACCTCTGTGCCAGCCCACCGTGGAAGGGACAGGGAGCTTCTAGCACAGATACGCAGTATTTTGGCCCA	CASPPWKGQGASSTDTQYF	5	5.7464e-05	TCRBV28-01*01	TCRBD01-01*01	TCRBJ02-03*01
ATTCTGGAGTCCGCCAGCACCAACCAGACATCTATGTACCTCTGTGCCAGCAGTATACCACAAGGGAGGCCCATATATTTTGGAGAG	CASSIPQGRPIYF	5	5.7464e-05	TCRBV28-01*01	TCRBD02-01*02	TCRBJ01-03*01
ATTCTGGAGTCCGCCAGCACCAACCAGACATCTATGTACCTCTGTGCCAGCAGTTTACAGGGAGTCGGCGAGCAGTACTTCGGGCCG	CASSLQGVGEQYF	5	5.7464e-05	TCRBV28-01*01		TCRBJ02-07*01
ATCCAGCGCACACAGCAGGAGGACTCGGCCGTGTATCTCTGTGCCAGCAGCTTGGTCAGCTCTTCTTACGAGCAGTACTTCGGGCCG	CASSLVSSSYEQYF	5	5.7464e-05	TCRBV07-02*01		TCRBJ02-07*01
GAGTCGCCCAGCCCCAACCAGACCTCTCTGTACTTCTGTGCCAGCAGTCCCACAGTAGCTTATAATTCACCCCTCCACTTTGGGAAC	CASSPTVAYNSPLHF	5	5.7464e-05	TCRBV27-01*01		TCRBJ01-06*01
CTGGAGTCGCCCAGCCCCAACCAGACCTCTCTGTACTTCTGTGCCAGCAGTCGGAATTGGCCGATCTACGAGCAGTACTTCGGGCCG	CASSRNWPIYEQYF	5	5.7464e-05	TCRBV27-01*01		TCRBJ02-07*01
TCCACGGAGTCAGGGGACACAGCACTGTATTTCTGTGCCAGCAGGGTTTCAAGACCCGGATGGCAAAACATTCAGTACTTCGGCGCC	CASRVSRPGWQNIQYF	5	5.7464e-05	TCRBV21-01*01		TCRBJ02-04*01
ACGGAGTCAGGGGACACAGCACTGTATTTCTGTGCCAGCAGCCCGGGACTAGCGGGGGGGCCGGCCGGGGAGCTGTTTTTTGGAGAA	CASSPGLAGGPAGELFF	5	5.7464e-05	TCRBV21-01*01	TCRBD02-01*01	TCRBJ02-02*01
GAGTCAGGGGACACAGCACTGTATTTCTGTGCCAGCAGCAAGGACCGGGACAGGGGGCCCTCTGGAAACACCATATATTTTGGAGAG	CASSKDRDRGPSGNTIYF	5	5.7464e-05	TCRBV21-01*01	TCRBD01-01*01	TCRBJ01-03*01
GAGTCCGCTACCAGCTCCCAGACATCTGTGTACTTCTGTGCCATCAGTGATCCAGGGGTTGTAACCTACGAGCAGTACTTCGGGCCG	CAISDPGVVTYEQYF	5	5.7464e-05	TCRBV10-03*01	TCRBD01-01*01	TCRBJ02-07*01
ACTCTGGAGTCCGCTACCAGCTCCCAGACATCTGTGTACTTCTGTGCCATCAGGGCAGGGTCGAATGAAAAACTGTTTTTTGGCAGT	CAIRAGSNEKLFF	5	5.7464e-05	TCRBV10-03*01	TCRBD01-01*01	TCRBJ01-04*01
GAGTCCGCTACCAGCTCCCAGACATCTGTGTACTTCTGTGCCATCAGATCATTGGATGTTCCATACAATGAGCAGTTCTTCGGGCCA	CAIRSLDVPYNEQFF	5	5.7464e-05	TCRBV10-03*01		TCRBJ02-01*01
CTGGAGTCCGCTACCAGCTCCCAGACATCTGTGTACTTCTGTGCCATCAAACCGGGACAGGCCTACAATGAGCAGTTCTTCGGGCCA	CAIKPGQAYNEQFF	5	5.7464e-05	TCRBV10-03*01	TCRBD01-01*01	TCRBJ02-01*01
CTGGAGTCCGCTACCAGCTCCCAGACATCTGTGTACTTCTGTGCCATCTGCCGGGGGGGCGGTCTGGATGAGCAGTTCTTCGGGCCA	CAICRGGGLDEQFF	5	5.7464e-05	TCRBV10-03*01	TCRBD02-01*01	TCRBJ02-01*01
GAGTCCGCTACCAGCTCCCAGACATCTGTGTACTTCTGTGCCATCAGGGGGACTAGCGGGCGCACAGATACGCAGTATTTTGGCCCA	CAIRGTSGRTDTQYF	5	5.7464e-05	TCRBV10-03*01	TCRBD02-01	TCRBJ02-03*01
CTGGAGTCGCCCAGCCCCAACCAGACCTCTCTGTACTTCTGTGCCAGCCGTATCGTGGGTGGGAATTCACCCCTCCACTTTGGGAAC	CASRIVGGNSPLHF	5	5.7464e-05	TCRBV27-01*01		TCRBJ01-06*01
GAGTCGCCCAGCCCCAACCAGACCTCTCTGTACTTCTGTGCCAGCAGTCTCTTGAGACAGGGGAATTCACCCCTCCACTTTGGGAAC	CASSLLRQGNSPLHF	5	5.7464e-05	TCRBV27-01*01	TCRBD01-01*01	TCRBJ01-06*01
ATCCTGGAGTCGCCCAGCCCCAACCAGACCTCTCTGTACTTCTGTGCCAGCAGCGGACAGGGACCAAATGGCTACACCTTCGGTTCG	CASSGQGPNGYTF	5	5.7464e-05	TCRBV27-01*01	TCRBD01-01*01	TCRBJ01-02*01
TCGCCCAGCCCCAACCAGACCTCTCTGTACTTCTGTGCCAGCAGTCCCGGACTAGCGGTAGCCACAGATACGCAGTATTTTGGCCCA	CASSPGLAVATDTQYF	5	5.7464e-05	TCRBV27-01*01	TCRBD02-01	TCRBJ02-03*01
GAGTCGCCCAGCCCCAACCAGACCTCTCTGTACTTCTGTGCCAGCAGGTTAACAGGGGGCGTCAAAAACATTCAGTACTTCGGCGCC	CASRLTGGVKNIQYF	5	5.7464e-05	TCRBV27-01*01	TCRBD01-01*01	TCRBJ02-04*01
ATCCTGGAGTCGCCCAGCCCCAACCAGACCTCTCTGTACTTCTGTGCCAGCAGCGACAGGGGGATCTACGAGCAGTACTTCGGGCCG	CASSDRGIYEQYF	5	5.7464e-05	TCRBV27-01*01	TCRBD01-01*01	TCRBJ02-07*01
GAGATCCAGTCCACGGAGTCAGGGGACACAGCACTGTATTTCTGTGCCGAGCTCCCCGGGGAGGGGAATGGCTACACCTTCGGTTCG	CAELPGEGNGYTF	5	5.7464e-05	TCRBV21-01*01	TCRBD02-01*02	TCRBJ01-02*01
ATCCAGCGCACACAGCAGGAGGACTCGGCCGTGTATCTCTGTGCCAGCAGCTCCGACTATGCGGCCTACGAGCAGTACTTCGGGCCG	CASSSDYAAYEQYF	5	5.7464e-05	TCRBV07-02*01	TCRBD02-01	TCRBJ02-07*01
CTGACGATCCAGCGCACACAGCAGGAGGACTCGGCCGTGTATCTCTGTGCCAGCACCCCTCGAGTCGGGGGCTACACCTTCGGTTCG	CASTPRVGGYTF	5	5.7464e-05	TCRBV07-02*01	TCRBD02-01	TCRBJ01-02*01
ATCCAGCGCACACAGCAGGAGGACTCGGCCGTGTATCTCTGTGCCAGCAGCTCCCACAGGGGTGGCTACGAGCAGTACTTCGGGCCG	CASSSHRGGYEQYF	5	5.7464e-05	TCRBV07-02*01	TCRBD01-01*01	TCRBJ02-07*01
ACGATCCAGCGCACACAGCAGGAGGACTCGGCCGTGTATCTCTGTGCCAGCAGCTTAGGGGGGCAAGAGACCCAGTACTTCGGGCCA	CASSLGGQETQYF	5	5.7464e-05	TCRBV07-02*01		TCRBJ02-05*01
ACGATCCAGCGCACACAGCAGGAGGACTCGGCCGTGTATCTCTGTGCCAGCAGCAATCCGGGACCCTCCGGCCTGTTCTTCGGGCCA	CASSNPGPSGLFF	5	5.7464e-05	TCRBV07-02*01		TCRBJ02-01*01
ACGATCCAGCGCACACAGCAGGAGGACTCGGCCGTGTATCTCTGTGCCAGCAGCTTATTCAAGGGGAATGAGCAGTTCTTCGGGCCA	CASSLFKGNEQFF	5	5.7464e-05	TCRBV07-02*01	TCRBD01-01*01	TCRBJ02-01*01
CGCACACAGCAGGAGGACTCGGCCGTGTATCTCTGTGCCAGCAGCCCGGTGACTAGCGGGGCCTACAATGAGCAGTTCTTCGGGCCA	CASSPVTSGAYNEQFF	5	5.7464e-05	TCRBV07-02*01	TCRBD02-01*01	TCRBJ02-01*01
CAGCGCACACAGCAGGAGGACTCGGCCGTGTATCTCTGTGCCAGCAGCTCGCGGGGGGCCTCCACCGGGGAGCTGTTTTTTGGAGAA	CASSSRGASTGELFF	5	5.7464e-05	TCRBV07-02*01	TCRBD02-01*01	TCRBJ02-02*01
ATCCAGCGCACACAGCAGGAGGACTCGGCCGTGTATCTCTGTGCCAGCAGCTTAAACAGAGCCCGGTATGGCTACACCTTCGGTTCG	CASSLNRARYGYTF	5	5.7464e-05	TCRBV07-02*01	TCRBD01-01*01	TCRBJ01-02*01
ACGATCCAGCGCACACAGCAGGAGGACTCGGCCGTGTATCTCTGTGCCAGCAGCTTACACAGGGAAGGAAGAGCTTTCTTTGGACAA	CASSLHREGRAFF	5	5.7464e-05	TCRBV07-02*01	TCRBD01-01*01	TCRBJ01-01*01
ACGATCCAGCGCACACAGCAGGAGGACTCGGCCGTGTATCTCTGTGCCAGCAGCTTCTCCTCTGGAAACACCATATATTTTGGAGAG	CASSFSSGNTIYF	5	5.7464e-05	TCRBV07-02*01	TCRBD02-01	TCRBJ01-03*01
GTGAGCAACATGAGCCCTGAAGACAGCAGCATATATCTCTGCAGCGTAGCCAAGAGCGAATCGGGAACTGAAGCTTTCTTTGGACAA	CSVAKSESGTEAFF	5	5.7464e-05	TCRBV29-01*01	TCRBD02-01*02	TCRBJ01-01*01
ACTGTGAGCAACATGAGCCCTGAAGACAGCAGCATATATCTCTGCAGCGTTTATCAGGGTGGGAACACTGAAGCTTTCTTTGGACAA	CSVYQGGNTEAFF	5	5.7464e-05	TCRBV29-01*01	TCRBD01-01*01	TCRBJ01-01*01
CTGACTGTGAGCAACATGAGCCCTGAAGACAGCAGCATATATCTCTGCAGCGTTCGGACAGGGCTCGAAAAACTGTTTTTTGGCAGT	CSVRTGLEKLFF	5	5.7464e-05	TCRBV29-01*01	TCRBD01-01*01	TCRBJ01-04*01
AGCAACATGAGCCCTGAAGACAGCAGCATATATCTCTGCAGCGTAGGGACAGTGAACTCTGGGGCCAACGTCCTGACTTTCGGGGCC	CSVGTVNSGANVLTF	5	5.7464e-05	TCRBV29-01*01	TCRBD01-01*01	TCRBJ02-06*01
GTGAGCAACATGAGCCCTGAAGACAGCAGCATATATCTCTGCAGCGTTGGGCCGGGACAGTTTCTCTCCGAGCAGTACTTCGGGCCG	CSVGPGQFLSEQYF	5	5.7464e-05	TCRBV29-01*01	TCRBD01-01*01	TCRBJ02-07*01
CGCACACAGCAGGAGGACTCGGCCGTGTATCTCTGTGCCAGCAGCCCGCACAGGGTGAGCTCCTACAATGAGCAGTTCTTCGGGCCA	CASSPHRVSSYNEQFF	5	5.7464e-05	TCRBV07-02*01	TCRBD01-01*01	TCRBJ02-01*01
CAGCGCACACAGCAGGAGGACTCGGCCGTGTATCTCTGTGCCAGCAGCCCAACAGGGGGTGATTACAATGAGCAGTTCTTCGGGCCA	CASSPTGGDYNEQFF	5	5.7464e-05	TCRBV07-02*01	TCRBD01-01*01	TCRBJ02-01*01
ACATCGGCCCAAAAGAACCCGACAGCTTTCTATCTCTGTGCCAGTGAGGGGGGGTACGGTGGCAATCAGCCCCAGCATTTTGGTGAT	CASEGGYGGNQPQHF	5	5.7464e-05	TCRBV19-01	TCRBD02-01*01	TCRBJ01-05*01
CAGCCTGCAAAGCTTGAGGACTCGGCCGTGTATCTCTGTGCCAGCAGCTTCCCCGGGACTAGCTACGAGACCCAGTACTTCGGGCCA	CASSFPGTSYETQYF	5	5.7464e-05	TCRBV11-02*02	TCRBD02-01	TCRBJ02-05*01
CAGCCTGCAAAGCTTGAGGACTCGGCCGTGTATCTCTGTGCCAGCAGGACCACCGGGGGGGGGAAAACTGAAGCTTTCTTTGGACAA	CASRTTGGGKTEAFF	5	5.7464e-05	TCRBV11-02*02	TCRBD02-01*01	TCRBJ01-01*01
CAGCCTGCAAAGCTTGAGGACTCGGCCGTGTATCTCTGTGCCAGCAGCTTAGGCAGCCTGGCAGGTGGTGGCTACACCTTCGGTTCG	CASSLGSLAGGGYTF	5	5.7464e-05	TCRBV11-02*02	TCRBD01-01*01	TCRBJ01-02*01
TCGGCCCAAAAGAACCCGACAGCTTTCTATCTCTGTGCCAGTAGTATAGTTGCGGGACAGGGGTATCAGCCCCAGCATTTTGGTGAT	CASSIVAGQGYQPQHF	5	5.7464e-05	TCRBV19-01	TCRBD01-01*01	TCRBJ01-05*01
ACATCGGCCCAAAAGAACCCGACAGCTTTCTATCTCTGTGCCAGTAGTAGGGAGGGATCAAGCAATCAGCCCCAGCATTTTGGTGAT	CASSREGSSNQPQHF	5	5.7464e-05	TCRBV19-01	TCRBD02-01*02	TCRBJ01-05*01
ACATCGGCCCAAAAGAACCCGACAGCTTTCTATCTCTGTGCCAGTAGTATCGACAGGGCGGACTACAATGAGCAGTTCTTCGGGCCA	CASSIDRADYNEQFF	5	5.7464e-05	TCRBV19-01	TCRBD01-01*01	TCRBJ02-01*01
ACATCGGCCCAAAAGAACCCGACAGCTTTCTATCTCTGTGCCAGTAGTATTACCATCAGGGGATCGGAGACCCAGTACTTCGGGCCA	CASSITIRGSETQYF	5	5.7464e-05	TCRBV19-01	TCRBD01-01*01	TCRBJ02-05*01
CAGCCTGCAAAGCTTGAGGACTCGGCCGTGTATCTCTGTGCCAGCAGCTTAGGAGCTTCTGTCTCCTACGAGCAGTACTTCGGGCCG	CASSLGASVSYEQYF	5	5.7464e-05	TCRBV11-02*02	TCRBD02-01	TCRBJ02-07*01
AAGATCCAGCCTGCAAAGCTTGAGGACTCGGCCGTGTATCTCTGTGCCAGCACCCCGAGCGGGCAAGAGACCCAGTACTTCGGGCCA	CASTPSGQETQYF	5	5.7464e-05	TCRBV11-02*02	TCRBD02-01	TCRBJ02-05*01
CTCAAGATCCAGCCTGCAAAGCTTGAGGACTCGGCCGTGTATCTCTGTGCCAGCAGCTTAGATAGAGCCGGCTACACCTTCGGTTCG	CASSLDRAGYTF	5	5.7464e-05	TCRBV11-02*02	TCRBD02-01	TCRBJ01-02*01
CCTGCAAAGCTTGAGGACTCGGCCGTGTATCTCTGTGCCAGCAGCTACCCAACGACAGGGGACAATGAAAAACTGTTTTTTGGCAGT	CASSYPTTGDNEKLFF	5	5.7464e-05	TCRBV11-02*02	TCRBD01-01*01	TCRBJ01-04*01
CAGCCTGCAAAGCTTGAGGACTCGGCCGTGTATCTCTGTGCCAGCAGCTTAGAATCGGGGGGCCTCTCCGAGCAGTACTTCGGGCCG	CASSLESGGLSEQYF	5	5.7464e-05	TCRBV11-02*02	TCRBD02-01*01	TCRBJ02-07*01
CCTGCAGAGCTTGGGGACTCGGCCGTGTATCTCTGTGCCAGCAGCTTATCCGGGGGGCTCAACACCGGGGAGCTGTTTTTTGGAGAA	CASSLSGGLNTGELFF	5	5.7464e-05	TCRBV11-03*01	TCRBD02-01*01	TCRBJ02-02*01
ATCCAGCCTGCAGAGCTTGGGGACTCGGCCGTGTATCTCTGTGCCAGCAGCCTACCGGGACCCGGGAAAAGGCAGTATTTTGGCCCA	CASSLPGPGKRQYF	5	5.7464e-05	TCRBV11-03*01		TCRBJ02-03*01
ACTGTGACATCGGCCCAAAAGAACCCGACAGCTTTCTATCTCTGTGCCAGTACCTTCGGGTCCGATTCACCCCTCCACTTTGGGAAC	CASTFGSDSPLHF	5	5.7464e-05	TCRBV19-01	TCRBD02-01	TCRBJ01-06*01
GCCCAAAAGAACCCGACAGCTTTCTATCTCTGTGCCAGTAGTATAGATCGGGCTGGCTTGTCGGTAGATACGCAGTATTTTGGCCCA	CASSIDRAGLSVDTQYF	5	5.7464e-05	TCRBV19-01		TCRBJ02-03*01
GTGACATCGGCCCAAAAGAACCCGACAGCTTTCTATCTCTGTGCCAGTAGTTCCCGGGGGCTAGCGGAGACCCAGTACTTCGGGCCA	CASSSRGLAETQYF	5	5.7464e-05	TCRBV19-01		TCRBJ02-05*01
ACATCGGCCCAAAAGAACCCGACAGCTTTCTATCTCTGTGCCAGTAGTCTCGCCGCGGGGATCTCCTACGAGCAGTACTTCGGGCCG	CASSLAAGISYEQYF	5	5.7464e-05	TCRBV19-01	TCRBD02-01*01	TCRBJ02-07*01
ACTGTGACATCGGCCCAAAAGAACCCGACAGCTTTCTATCTCTGTGCCAGTAGTATTCCGGCGGGCAATGAGCAGTTCTTCGGGCCA	CASSIPAGNEQFF	5	5.7464e-05	TCRBV19-01	TCRBD02-01	TCRBJ02-01*01
ACTGTGACATCGGCCCAAAAGAACCCGACAGCTTTCTATCTCTGTGCCAGTAGTATGGGGGACGGTTACGAGCAGTACTTCGGGCCG	CASSMGDGYEQYF	5	5.7464e-05	TCRBV19-01		TCRBJ02-07*01
GTGACATCGGCCCAAAAGAACCCGACAGCTTTCTATCTCTGTGCCAGTAGTATAGCTTTCGGGGACACTGAAGCTTTCTTTGGACAA	CASSIAFGDTEAFF	5	5.7464e-05	TCRBV19-01	TCRBD02-01*01	TCRBJ01-01*01
CCTCTCACTGTGACATCGGCCCAAAAGAACCCGACAGCTTTCTATCTCTGTGCCAGTAGTAGGGGGTACATTCAGTACTTCGGCGCC	CASSRGYIQYF	5	5.7464e-05	TCRBV19-01		TCRBJ02-04*01
ACTGTGACATCGGCCCAAAAGAACCCGACAGCTTTCTATCTCTGTGCCAGTAATTATCACCCCTCGGGGGCCCAGCATTTTGGTGAT	CASNYHPSGAQHF	5	5.7464e-05	TCRBV19-01	TCRBD02-01*01	TCRBJ01-05*01
ATCCAGCCTGCAGAGCTTGGGGACTCGGCCGTGTATCTCTGTGCCAGCAGCTCCCTCGGGGGTGAGGGTGAGCAGTTCTTCGGGCCA	CASSSLGGEGEQFF	5	5.7464e-05	TCRBV11-03*01	TCRBD02-01*01	TCRBJ02-01*01
ACATCGGCCCAAAAGAACCCGACAGCTTTCTATCTCTGTGCCAGTAGTAGCGAAAGGGGGGCAAACTATGGCTACACCTTCGGTTCG	CASSSERGANYGYTF	5	5.7464e-05	TCRBV19-01		TCRBJ01-02*01
TCTGCCAGGCCCTCACATACCTCTCAGTACCTCTGTGCCAGCAGTGAATATATCGGGGCAACTAATGAAAAACTGTTTTTTGGCAGT	CASSEYIGATNEKLFF	5	5.7464e-05	TCRBV25-01*01	TCRBD02-01*01	TCRBJ01-04*01
GAGTCTGCCAGGCCCTCACATACCTCTCAGTACCTCTGTGCCAGCAGTGAGACAGGGGGAAGGTACAATGAGCAGTTCTTCGGGCCA	CASSETGGRYNEQFF	5	5.7464e-05	TCRBV25-01*01	TCRBD01-01*01	TCRBJ02-01*01
ACCCTGGAGTCTGCCAGGCCCTCACATACCTCTCAGTACCTCTGTGCCAGCAGAGGGACAGGGGTTTACGAGCAGTACTTCGGGCCG	CASRGTGVYEQYF	5	5.7464e-05	TCRBV25-01*01	TCRBD01-01*01	TCRBJ02-07*01
GAGTCTGCCAGGCCCTCACATACCTCTCAGTACCTCTGTGCCAGCAGTGGGGGTGGGGCAACTAATGAAAAACTGTTTTTTGGCAGT	CASSGGGATNEKLFF	5	5.7464e-05	TCRBV25-01*01		TCRBJ01-04*01
AGCTCCTTGGAGCTGGGGGACTCAGCCCTGTACTTCTGTGCCAGCAGCTTAGAGACAGGGATAAATTCACCCCTCCACTTTGGGAAC	CASSLETGINSPLHF	5	5.7464e-05	TCRBV13-01*01	TCRBD01-01*01	TCRBJ01-06*01
GCAATCCTGTCCTCAGAACCGGGAGACACGGCACTGTATCTCTGCGCCAGCAGCCCGGGGCGGAACACTGAAGCTTTCTTTGGACAA	CASSPGRNTEAFF	5	5.7464e-05	TCRBV23-01*01		TCRBJ01-01*01
ATCAATTCCCTGGAGCTTGGTGACTCTGCTGTGTATTTCTGTGCCAGCAAGGACTCGCCCTATAATTCACCCCTCCACTTTGGGAAC	CASKDSPYNSPLHF	5	5.7464e-05	TCRBV03	TCRBD02-01	TCRBJ01-06*01
ACAGTGACCAGTGCCCATCCTGAAGACAGCAGCTTCTACATCTGCAGTGCCAAAGGGGCGGGGGACACTGAAGCTTTCTTTGGACAA	CSAKGAGDTEAFF	5	5.7464e-05	TCRBV20	TCRBD02-01*01	TCRBJ01-01*01
CTTCACATCAATTCCCTGGAGCTTGGTGACTCTGCTGTGTATTTCTGTGCCAGCAGCCAAGAAGGCTATGGCTACACCTTCGGTTCG	CASSQEGYGYTF	5	5.7464e-05	TCRBV03		TCRBJ01-02*01
CACATCAATTCCCTGGAGCTTGGTGACTCTGCTGTGTATTTCTGTGCCAGCAGCCAAGTCCATAATTCACCCCTCCACTTTGGGAAC	CASSQVHNSPLHF	5	5.7464e-05	TCRBV03		TCRBJ01-06*01
TTGGAGTCGGCTGCTCCCTCCCAAACATCTGTGTACTTCTGTGCCAGCAGTTACGGGACAGGGAATTCACCCCTCCACTTTGGGAAC	CASSYGTGNSPLHF	5	5.7464e-05	TCRBV06	TCRBD01-01*01	TCRBJ01-06*01
GTGACCAGTGCCCATCCTGAAGACAGCAGCTTCTACATCTGCAGTGCTAGAGATCGGACAGGTTATTCACCCCTCCACTTTGGGAAC	CSARDRTGYSPLHF	5	5.7464e-05	TCRBV20	TCRBD01-01*01	TCRBJ01-06*01
ACCAGTGCCCATCCTGAAGACAGCAGCTTCTACATCTGCAGTGCCCCGAGACAGGGAAGCATGCGCACTGAAGCTTTCTTTGGACAA	CSAPRQGSMRTEAFF	5	5.7464e-05	TCRBV20	TCRBD01-01*01	TCRBJ01-01*01
ATCCAGCCCTCAGAACCCAGGGACTCAGCTGTGTACTTCTGTGCCAGCAGTGGTAGCGATAGCTCCTACGAGCAGTACTTCGGGCCG	CASSGSDSSYEQYF	5	5.7464e-05	TCRBV12	TCRBD02-01	TCRBJ02-07*01
ATCCAGCCCTCAGAACCCAGGGACTCAGCTGTGTACTTCTGTGCCAGCAGTCCAGCCCCGGGCCCGGAGACCCAGTACTTCGGGCCA	CASSPAPGPETQYF	5	5.7464e-05	TCRBV12		TCRBJ02-05*01
AAGATCCAGCCCTCAGAACCCAGGGACTCAGCTGTGTACTTCTGTGCCAGCAGTTTATCAGGGAAGAGCGAGCAGTACTTCGGGCCG	CASSLSGKSEQYF	5	5.7464e-05	TCRBV12	TCRBD01-01*01	TCRBJ02-07*01
GAGGACTCGGCCGTGTATCTCTGTGCCAGCAGCTTTGACTCTTTATTAGCGGGGGGGGAAAACACAGATACGCAGTATTTTGGCCCA	CASSFDSLLAGGENTDTQYF	5	5.7464e-05		TCRBD02-01*01	TCRBJ02-03*01
CATCCTGAAGACAGCAGCTTCTACATCTGCAGTGCTAGAGGTCAACATGGCGGGGGGGCCGGTGCAGATACGCAGTATTTTGGCCCA	CSARGQHGGGAGADTQYF	5	5.7464e-05	TCRBV20	TCRBD02-01*01	TCRBJ02-03*01
GAGCTTGGTGACTCTGCTGTGTATTTCTGTGCCAGCAGCCAAGTTCTGGGAAGGGGGGGGAGGACAGATACGCAGTATTTTGGCCCA	CASSQVLGRGGRTDTQYF	5	5.7464e-05	TCRBV03	TCRBD02-01*01	TCRBJ02-03*01
TCAGAACCCAGGGACTCAGCTGTGTACTTCTGTGCCAGCAGTTCTCAACAGGGGCGAGGGCACACCGGGGAGCTGTTTTTTGGAGAA	CASSSQQGRGHTGELFF	5	5.7464e-05	TCRBV12	TCRBD01-01*01	TCRBJ02-02*01
ACCAGTGCCCATCCTGAAGACAGCAGCTTCTACATCTGCAGTGCTAGGTTTAGCGGGGCGTCTTACAATGAGCAGTTCTTCGGGCCA	CSARFSGASYNEQFF	5	5.7464e-05	TCRBV20	TCRBD02-01*01	TCRBJ02-01*01
AATTCCCTGGAGCTTGGTGACTCTGCTGTGTATTTCTGTGCCAGCAACCCCGGGGGGACAGAGAACACTGAAGCTTTCTTTGGACAA	CASNPGGTENTEAFF	5	5.7464e-05	TCRBV03		TCRBJ01-01*01
ACCAGTGCCCATCCTGAAGACAGCAGCTTCTACATCTGCAGTGCTAGAGATGGGGGCCGGGGGGCCTACGAGCAGTACTTCGGGCCG	CSARDGGRGAYEQYF	5	5.7464e-05	TCRBV20	TCRBD02-01*01	TCRBJ02-07*01
TCGGCTGCTCCCTCCCAAACATCTGTGTACTTCTGTGCCAGCAGTTTACGGGACAGGGTGAGCGGCTATGGCTACACCTTCGGTTCG	CASSLRDRVSGYGYTF	5	5.7464e-05	TCRBV06	TCRBD01-01*01	TCRBJ01-02*01
ATCAATTCCCTGGAGCTTGGTGACTCTGCTGTGTATTTCTGTGCCAGCAGCCAGCGGAAATCTTTGGACATTCAGTACTTCGGCGCC	CASSQRKSLDIQYF	5	5.7464e-05	TCRBV03	TCRBD02-01	TCRBJ02-04*01
GCCCATCCTGAAGACAGCAGCTTCTACATCTGCGGATCGTCTACACCGGGGCTCAGGGGCACGAGGACTGAAGCTTTCTTTGGACAA	CGSSTPGLRGTRTEAFF	5	5.7464e-05	TCRBV20	TCRBD01-01*01	TCRBJ01-01*01
ATCCAGCCCTCAGAACCCAGGGACTCAGCTGTGTACTTCTGTGCCAGCAGTTTTGGGCCACTGACAGATACGCAGTATTTTGGCCCA	CASSFGPLTDTQYF	5	5.7464e-05	TCRBV12	TCRBD01-01*01	TCRBJ02-03*01
CTAGAGTCTGCCATCCCCAACCAGACAGCTCTTTACTTCTGTGCCACCAGTGAGAAGGAGGCTGGAAACACCATATATTTTGGAGAG	CATSEKEAGNTIYF	5	5.7464e-05	TCRBV24	TCRBD02-01*02	TCRBJ01-03*01
CAGCCCTCAGAACCCAGGGACTCAGCTGTGTACTTCTGTGCCAGCAGTTTTGGTCAGGGTCGGAATTCACCCCTCCACTTTGGGAAC	CASSFGQGRNSPLHF	5	5.7464e-05	TCRBV12	TCRBD01-01*01	TCRBJ01-06*01
CCCTCAGAACCCAGGGACTCAGCTGTGTACTTCTGTGCCAGCAGTTACCCATCGACAGGGCGAGGCACTGAAGCTTTCTTTGGACAA	CASSYPSTGRGTEAFF	5	5.7464e-05	TCRBV12	TCRBD01-01*01	TCRBJ01-01*01
GAGTCGGCTGCTCCCTCCCAAACATCTGTGTACTTCTGTGCCAGCAGTAGTACTAGCGGGGTCACCTACGAGCAGTACTTCGGGCCG	CASSSTSGVTYEQYF	5	5.7464e-05	TCRBV06	TCRBD02-01*01	TCRBJ02-07*01
TCGGCTGCTCCCTCCCAGACATCTGTGTACTTCTGTGCCAGCACACTTAGTCATGCGACGAACACCGGGGAGCTGTTTTTTGGAGAA	CASTLSHATNTGELFF	5	5.7464e-05	TCRBV06	TCRBD02-01	TCRBJ02-02*01
CAGCCCTCAGAACCCAGGGACTCAGCTGTGTACTTCTGTGCCAGCAGTTTACGGGGGGTTGGCCATCAGCCCCAGCATTTTGGTGAT	CASSLRGVGHQPQHF	5	5.7464e-05	TCRBV12	TCRBD02-01*01	TCRBJ01-05*01
ATCAATTCCCTGGAGCTTGGTGACTCTGCTGTGTATTTCTGTGCCAGCAGCCAAGGGCTCGGCAATCAGCCCCAGCATTTTGGTGAT	CASSQGLGNQPQHF	5	5.7464e-05	TCRBV03	TCRBD01-01*01	TCRBJ01-05*01
CTGACAGTGACCAGTGCCCATCCTGAAGACAGCAGCTTCTACATCTGCAGTGCGAAGTCCAGGGCCTTTGGCTACACCTTCGGTTCG	CSAKSRAFGYTF	5	5.7464e-05	TCRBV20	TCRBD01-01*01	TCRBJ01-02*01
CATCCTGAAGACAGCAGCTTCTACATCTGCAGTGCTAGAGATGCCCTACAGGGCAGCTCCTATAATTCACCCCTCCACTTTGGGAAC	CSARDALQGSSYNSPLHF	5	5.7464e-05	TCRBV20	TCRBD01-01*01	TCRBJ01-06*01
ACAGTGACCAGTGCCCATCCTGAAGACAGCAGCTTCTACATCTGCAGTGCTAGAGTTGACCCGAACACTGAAGCTTTCTTTGGACAA	CSARVDPNTEAFF	5	5.7464e-05	TCRBV20		TCRBJ01-01*01
AGTGCCCATCCTGAAGACAGCAGCTTCTACATCTGCAGTGCTAGTAGGGGACGGGGGGGCCTTAACTATGGCTACACCTTCGGTTCG	CSASRGRGGLNYGYTF	5	5.7464e-05	TCRBV20	TCRBD02-01*01	TCRBJ01-02*01
CAGCCCTCAGAACCCAGGGACTCAGCTGTGTACTTCTGTGCCAGCAGCTTAATAGCGGGGCGACCCTACGAGCAGTACTTCGGGCCG	CASSLIAGRPYEQYF	5	5.7464e-05	TCRBV12	TCRBD02-01*01	TCRBJ02-07*01
GGGTTGGAGTCGGCTGCTCCCTCCCAAACATCTGTGTACTTCTGTGCCAGCAGACACAGGGACTCCTACGAGCAGTACTTCGGGCCG	CASRHRDSYEQYF	5	5.7464e-05	TCRBV06	TCRBD01-01*01	TCRBJ02-07*01
GACTCGGCCATGTATCTCTGTGCCAGCAGCGTAGGCAGGGACAGGGGGCGCAGAGGGAGCATAGTCTATGGCTACACCTTCGGTTCG	CASSVGRDRGRRGSIVYGYTF	5	5.7464e-05		TCRBD01-01*01	TCRBJ01-02*01
ACCAGTGCCCATCCTGAAGACAGCAGCTTCTACATCTGCAGTGTGAGCGGAGGGGGGGGGAGCACAGATACGCAGTATTTTGGCCCA	CSVSGGGGSTDTQYF	5	5.7464e-05	TCRBV20	TCRBD02-01*01	TCRBJ02-03*01
AGTGCCCATCCTGAAGACAGCAGCTTCTACATCTGCAGTGCCCCAAGTCACACGGGGGACCACCAAGAGACCCAGTACTTCGGGCCA	CSAPSHTGDHQETQYF	5	5.7464e-05	TCRBV20	TCRBD02-01*01	TCRBJ02-05*01
GTGACCAGTGCCCATCCTGAAGACAGCAGCTTCTACATCTGCAGTGCTAGGTGGACTACAGTTAAAGAGACCCAGTACTTCGGGCCA	CSARWTTVKETQYF	5	5.7464e-05	TCRBV20	TCRBD02-01	TCRBJ02-05*01
CACATCAATTCCCTGGAGCTTGGTGACTCTGCTGTGTATTTCTGTGCCAGCAGCCAAGATAACCGCTACGAGCAGTACTTCGGGCCG	CASSQDNRYEQYF	5	5.7464e-05	TCRBV03		TCRBJ02-07*01
CTGGAGCTTGGTGACTCTGCTGTGTATTTCTGTGCCAGCACCCCAGATCGTCTGGGGCCGAGCACAGATACGCAGTATTTTGGCCCA	CASTPDRLGPSTDTQYF	5	5.7464e-05	TCRBV03	TCRBD01-01*01	TCRBJ02-03*01
GACTCTGCTGTGTATTTCTGTGCCAGCAGCCTTATACTATCCCTGGGGGACAGGGGGCCTCATAACTATGGCTACACCTTCGGTTCG	CASSLILSLGDRGPHNYGYTF	5	5.7464e-05	TCRBV03	TCRBD01-01*01	TCRBJ01-02*01
TCTGCCATCCCCAACCAGACAGCTCTTTACTTCTGTGCCACCAGCCGCGGGGGACAGGGTGGAGCCGGGGAGCTGTTTTTTGGAGAA	CATSRGGQGGAGELFF	5	5.7464e-05	TCRBV24	TCRBD01-01*01	TCRBJ02-02*01
GCTGCTCCCTCCCAAACATCTGTGTACTTCTGTGCCAGCAGTAACCTACCGGCTAGCGGGAACACAGATACGCAGTATTTTGGCCCA	CASSNLPASGNTDTQYF	5	5.7464e-05	TCRBV06	TCRBD02-01*02	TCRBJ02-03*01
CAGCCCTCAGAACCCAGGGACTCAGCTGTGTACTTCTGTGCCAGCAGTTTAGCGACAGGGGGCTTTCAGCCCCAGCATTTTGGTGAT	CASSLATGGFQPQHF	5	5.7464e-05	TCRBV12	TCRBD01-01*01	TCRBJ01-05*01
TCAGAACCCAGGGACTCAGCTGTGTACTTCTGTGCCAGCAGCGCGGCTAGCGGGGGGGCCGGGAGGAACATTCAGTACTTCGGCGCC	CASSAASGGAGRNIQYF	5	5.7464e-05	TCRBV12	TCRBD02-01*01	TCRBJ02-04*01
ATCAATTCCCTGGAGCTTGGTGACTCTGCTGTGTATTTCTGTGCCAGCAGCCTCGGGGGACAGAACACTGAAGCTTTCTTTGGACAA	CASSLGGQNTEAFF	5	5.7464e-05	TCRBV03		TCRBJ01-01*01
ACCAGTGCCCATCCTGAAGACAGCAGCTTCTACATCTGCAGTGCTAGATCCATAGCGGGGGGAGGAGAGACCCAGTACTTCGGGCCA	CSARSIAGGGETQYF	5	5.7464e-05	TCRBV20	TCRBD02-01*01	TCRBJ02-05*01
CACATCAATTCCCTGGAGCTTGGTGACTCTGCTGTGTATTTCTGTGCCAGCAGTCGCAGCGGGGAGGATACGCAGTATTTTGGCCCA	CASSRSGEDTQYF	5	5.7464e-05	TCRBV03	TCRBD02-01*01	TCRBJ02-03*01
CAGCCCTCAGAACCCAGGGACTCAGCTGTGTACTTCTGTGCCAGCAGTTTCGGGACAGGGCTGAATGAAAAACTGTTTTTTGGCAGT	CASSFGTGLNEKLFF	5	5.7464e-05	TCRBV12	TCRBD01-01*01	TCRBJ01-04*01
ACAGTGACCAGTGCCCATCCTGAAGACAGCAGCTTCTACATCTGCAGTGCTGCGAAGGGCAGGGTAGATGAAGCTTTCTTTGGACAA	CSAAKGRVDEAFF	5	5.7464e-05	TCRBV20	TCRBD01-01*01	TCRBJ01-01*01
GGGTTGGAGTCGGCTGCTCCCTCCCAAACATCTGTGTACTTCTGTGCCAGCAGTGGCTGGCCCACAGATACGCAGTATTTTGGCCCA	CASSGWPTDTQYF	5	5.7464e-05	TCRBV06	TCRBD01-01*01	TCRBJ02-03*01
GAGTCTGCCATCCCCAACCAGACAGCTCTTTACTTCTGTGCCACCAGTGATTCCGGGGCCCGCACAGATACGCAGTATTTTGGCCCA	CATSDSGARTDTQYF	5	5.7464e-05	TCRBV24		TCRBJ02-03*01
GCTGCTCCCTCCCAAACATCTGTGTACTTCTGTGCCAGCAGTTACTCGATCAGTAGCGGAGGTCAAGAGACCCAGTACTTCGGGCCA	CASSYSISSGGQETQYF	5	5.7464e-05	TCRBV06	TCRBD02-01	TCRBJ02-05*01
GTGACCAGTGCCCATCCTGAAGACAGCAGCTTCTACATCTGCAGTGCTAGAGATCGTCCAGGGTTCGGTGGCTACACCTTCGGTTCG	CSARDRPGFGGYTF	5	5.7464e-05	TCRBV20	TCRBD01-01*01	TCRBJ01-02*01
ACTCTGAAGATCCAGCCCTCAGAACCCAGGGACTCAGCTGTGTACTTCTGTGCCAGCAGTTTTTCCGAGACCCAGTACTTCGGGCCA	CASSFSETQYF	5	5.7464e-05	TCRBV12		TCRBJ02-05*01
GAGTCAGCTGCTCCCTCCCAGACATCTGTGTACTTCTGTGCCCGCACTAAACGGGACAGGGGGCTCAATGAGCAGTTCTTCGGGCCA	CARTKRDRGLNEQFF	5	5.7464e-05	TCRBV06	TCRBD01-01*01	TCRBJ02-01*01
GAGTCGGCTGCTCCCTCCCAAACATCTGTGTACTTCTGTGCCAGCACCGCCACGGCGGGGGGGACAGATACGCAGTATTTTGGCCCA	CASTATAGGTDTQYF	5	5.7464e-05	TCRBV06	TCRBD02-01*01	TCRBJ02-03*01
CAGCCCTCAGAACCCAGGGACTCAGCTGTGTACTTCTGTGCCAGCAGAATAGCGGGGGGGAACACCGGGGAGCTGTTTTTTGGAGAA	CASRIAGGNTGELFF	5	5.7464e-05	TCRBV12	TCRBD02-01*01	TCRBJ02-02*01
CAGCCCTCAGAACCCAGGGACTCAGCTGTGTACTTCTGTGCCAGCAGTTTACCGGGACAGGGGGCATTCGGCTACACCTTCGGTTCG	CASSLPGQGAFGYTF	5	5.7464e-05	TCRBV12	TCRBD01-01*01	TCRBJ01-02*01
GTGACCAGTGCCCATCCTGAAGACAGCAGCTTCTACATCTGCAGTGCTAGAGATGCAGGGATTTCTTCACCCCTCCACTTTGGGAAC	CSARDAGISSPLHF	5	5.7464e-05	TCRBV20	TCRBD01-01*01	TCRBJ01-06*01
ACCAGTGCCCATCCTGAAGACAGCAGCTTCTACATCTGCAGTGCTAGAGATCTAGCGGGGGCCAAAAACATTCAGTACTTCGGCGCC	CSARDLAGAKNIQYF	5	5.7464e-05	TCRBV20	TCRBD02-01*01	TCRBJ02-04*01
AATTCCCTGGAGCTTGGTGACTCTGCTGTGTATTTCTGTGCCAGCAGCCAAGGGTCAGGGGGCTCAGCTGAAGCTTTCTTTGGACAA	CASSQGSGGSAEAFF	5	5.7464e-05	TCRBV03	TCRBD01-01*01	TCRBJ01-01*01
CTGACAGTGACCAGTGCCCATCCTGAAGACAGCAGCTTCTACATCTGCAGTGCTAGAGATCAGAAAAATGAGCAGTTCTTCGGGCCA	CSARDQKNEQFF	5	5.7464e-05	TCRBV20	TCRBD01-01*01	TCRBJ02-01*01
AAGATCCAGCCCTCAGAACCCAGGGACTCAGCTGTGTACTTCTGTGCCAGCAGTCCTTCGGGAGGCAGGGAAGCTTTCTTTGGACAA	CASSPSGGREAFF	5	5.7464e-05	TCRBV12	TCRBD02-01*02	TCRBJ01-01*01
CAGCCCTCAGAACCCAGGGACTCAGCTGTGTACTTCTGTGCCAGCCATAGAGCCGGGATACATGGCGATGGCTACACCTTCGGTTCG	CASHRAGIHGDGYTF	5	5.7464e-05	TCRBV12	TCRBD02-01*02	TCRBJ01-02*01
CCCTCAGAACCCAGGGACTCAGCTGTGTACTTCTGTGCCAGCAGTTTGGTGGGGCGGGAGTTGAACACTGAAGCTTTCTTTGGACAA	CASSLVGRELNTEAFF	5	5.7464e-05	TCRBV12	TCRBD02-01*02	TCRBJ01-01*01
ACAGTGACCAGTGCCCATCCTGAAGACAGCAGCTTCTACATCTGCAGTGCAGCCCGACAGGGGAACACTGAAGCTTTCTTTGGACAA	CSAARQGNTEAFF	5	5.7464e-05	TCRBV20	TCRBD01-01*01	TCRBJ01-01*01
CTGAAGATCCAGCCCTCAGAACCCAGGGACTCAGCTGTGTACTTCTGTGCCAGCAACCTAGGGAATCAGCCCCAGCATTTTGGTGAT	CASNLGNQPQHF	5	5.7464e-05	TCRBV12		TCRBJ01-05*01
CTGGGGTTGGAGTCGGCTGCTCCCTCCCAAACATCTGTGTACTTCTGTGCCAGCAGGGCGTTGAACACTGAAGCTTTCTTTGGACAA	CASRALNTEAFF	5	5.7464e-05	TCRBV06		TCRBJ01-01*01
ACCCTGCAGCCAGAAGACTCGGCCCTGTATCTCTGTGCCAGCAGCCAAGATGCTAGCGGGGGGGCAGATACGCAGTATTTTGGCCCA	CASSQDASGGADTQYF	4	4.59712e-05	TCRBV04-02*01	TCRBD02-01*01	TCRBJ02-03*01
CACCTACACACCCTGCAGCCAGAAGACTCGGCCCTGTATCTCTGTGCCAGCAGCCAGACAGCTGGAAACACCATATATTTTGGAGAG	CASSQTAGNTIYF	4	4.59712e-05	TCRBV04-02*01	TCRBD01-01*01	TCRBJ01-03*01
CTACACACCCTGCAGCCAGAAGACTCGGCCCTGTATCTCTGTGCCAGCAGAAGGGGGGGGCCCCCGAGTGAGCAGTTCTTCGGGCCA	CASRRGGPPSEQFF	4	4.59712e-05	TCRBV04-02*01	TCRBD02-01*01	TCRBJ02-01*01
ACAGAGCAGCGGGACTCGGCCATGTATCGCTGTGCCAGCAGCCGCAGTTTACGGGCCGCAACTAATGAAAAACTGTTTTTTGGCAGT	CASSRSLRAATNEKLFF	4	4.59712e-05	TCRBV07-06*01		TCRBJ01-04*01
CAGCGCACAGAGCAGCGGGACTCGGCCATGTATCGCTGTGCCAGCAGCTTAGCGCATTCAGGGCAGGATACGCAGTATTTTGGCCCA	CASSLAHSGQDTQYF	4	4.59712e-05	TCRBV07-06*01	TCRBD01-01*01	TCRBJ02-03*01
CTGAGCTCTCTGGAGCTGGGGGACTCAGCTTTGTATTTCTGTGCCAGCAGCCTCGGGACGGTAGGAGATACGCAGTATTTTGGCCCA	CASSLGTVGDTQYF	4	4.59712e-05	TCRBV09-01		TCRBJ02-03*01
GCCTTGTTGCTGGGGGACTCGGCCCTCTATCTCTGTGCCAGCAGCTCCGCCGGGACAGGGCCCGGCACTGAAGCTTTCTTTGGACAA	CASSSAGTGPGTEAFF	4	4.59712e-05	TCRBV05-06*01	TCRBD01-01*01	TCRBJ01-01*01
CAGCGCACAGAGCAGCGGGACTCGGCCATGTATCGCTGTGCCAGCAGCCAAGGACAGGGGATGTCCTATGGCTACACCTTCGGTTCG	CASSQGQGMSYGYTF	4	4.59712e-05	TCRBV07-06*01	TCRBD01-01*01	TCRBJ01-02*01
CTGACGATCCAGCGCACAGAGCAGCGGGACTCGGCCATGTATCGCTGTGCCAGCAGCTTAAAAGAAGATACGCAGTATTTTGGCCCA	CASSLKEDTQYF	4	4.59712e-05	TCRBV07-06*01		TCRBJ02-03*01
ATCCAGCGCACAGAGCAGCGGGACTCGGCCATGTATCGCTGTGCCAGCAGCGATGCGGGGGGGGCAGATACGCAGTATTTTGGCCCA	CASSDAGGADTQYF	4	4.59712e-05	TCRBV07-06*01	TCRBD02-01*01	TCRBJ02-03*01
CTGACGATCCAGCGCACAGAGCAGCGGGACTCGGCCATGTATCGCTGTGCCAGCAGCTTAGCCACAGATACGCAGTATTTTGGCCCA	CASSLATDTQYF	4	4.59712e-05	TCRBV07-06*01		TCRBJ02-03*01
TCACCAGGCCTGGGGGACGCAGCCATGTACCTGTGTGCCACCAGCAGAGGGACAGGAACTAGCACAGATACGCAGTATTTTGGCCCA	CATSRGTGTSTDTQYF	4	4.59712e-05	TCRBV15-01*01	TCRBD01-01*01	TCRBJ02-03*01
TCACCAGGCCTGGGGGACGCAGCCATGTACCTGTGTGCCACCAGCAGAGATGTAGGGTCTGGGGCCAACGTCCTGACTTTCGGGGCC	CATSRDVGSGANVLTF	4	4.59712e-05	TCRBV15-01*01		TCRBJ02-06*01
CGCTCACCAGGCCTGGGGGACGCAGCCATGTACCTGTGTGCCACCAGCAGAGATCCGGGTAGCAATCAGCCCCAGCATTTTGGTGAT	CATSRDPGSNQPQHF	4	4.59712e-05	TCRBV15-01*01	TCRBD02-01	TCRBJ01-05*01
TCACCAGGCCTGGGGGACGCAGCCATGTACCTGTGTGCCACCAGCACCAGGCGACAGACGTCCGCCGGGGAGCTGTTTTTTGGAGAA	CATSTRRQTSAGELFF	4	4.59712e-05	TCRBV15-01*01	TCRBD01-01*01	TCRBJ02-02*01
GACATCCGCTCACCAGGCCTGGGGGACGCAGCCATGTACCTGTGTGCCACCAGCAGAGGGGTGGACACTGAAGCTTTCTTTGGACAA	CATSRGVDTEAFF	4	4.59712e-05	TCRBV15-01*01		TCRBJ01-01*01
TCACCAGGCCTGGGGGACGCAGCCATGTACCTGTGTGCCACCAGCAGTCGAGGACAGTTAGCCAAAAACATTCAGTACTTCGGCGCC	CATSSRGQLAKNIQYF	4	4.59712e-05	TCRBV15-01*01	TCRBD01-01*01	TCRBJ02-04*01
GACATCCGCTCACCAGGCCTGGGGGACGCAGCCATGTACCTGTGTGCCACCAGCAGAGATCAGGGCTACGAGCAGTACTTCGGGCCG	CATSRDQGYEQYF	4	4.59712e-05	TCRBV15-01*01	TCRBD01-01*01	TCRBJ02-07*01
CGCTCACCAGGCCTGGGGGACGCAGCCATGTACCTGTGTGCCACCAGCAGAGATAGGGGTGGAAATCAGCCCCAGCATTTTGGTGAT	CATSRDRGGNQPQHF	4	4.59712e-05	TCRBV15-01*01	TCRBD01-01*01	TCRBJ01-05*01
CTTCACCTACACGCCCTGCAGCCAGAAGACTCAGCCCTGTATCTCTGCGCCAGCAGCCAAGATCTTCCCCCAGTATACTTCGGGCCG	CASSQDLPPVYF	4	4.59712e-05	TCRBV04-01*01	TCRBD01-01*01	TCRBJ02-07*01
ACCCTGCAGCCAGAAGACTCGGCCCTGTATCTCTGCGCCAGCAGCCAAGTGCCAGGGGATAGTTCCGGGGAGCTGTTTTTTGGAGAA	CASSQVPGDSSGELFF	4	4.59712e-05	TCRBV04-03*01	TCRBD01-01*01	TCRBJ02-02*01
CAGCCAGAAGACTCGGCCCTGTATCTCTGCGCCAGCAGCCGCCGGAGGACTAGCGGGGGGAACACAGATACGCAGTATTTTGGCCCA	CASSRRRTSGGNTDTQYF	4	4.59712e-05	TCRBV04-03*01	TCRBD02-01*01	TCRBJ02-03*01
CTGCAGCCAGAAGACTCGGCCCTGTATCTCTGCGCCAGCAGCCAAGATAACCGGGGGGGAAACTACAATGAGCAGTTCTTCGGGCCA	CASSQDNRGGNYNEQFF	4	4.59712e-05	TCRBV04-03*01	TCRBD02-01*01	TCRBJ02-01*01
AATGTGAACGCCTTGTTGCTGGGGGACTCGGCCCTGTATCTCTGTGCCAGCAGCTTGGTCCAGGGCCGTGGCTACACCTTCGGTTCG	CASSLVQGRGYTF	4	4.59712e-05	TCRBV05-05*01	TCRBD01-01*01	TCRBJ01-02*01
TTGTTGCTGGGGGACTCGGCCCTGTATCTCTGTGCCAGCAGCCAACAAGCAGGACAGGCCTATAATTCACCCCTCCACTTTGGGAAC	CASSQQAGQAYNSPLHF	4	4.59712e-05	TCRBV05-05*01	TCRBD01-01*01	TCRBJ01-06*01
AACGCCTTGTTGCTGGGGGACTCGGCCCTGTATCTCTGTGCCAGCAGCAGCGATCTAGCGGGGGGAGAGACCCAGTACTTCGGGCCA	CASSSDLAGGETQYF	4	4.59712e-05	TCRBV05-05*01	TCRBD02-01*01	TCRBJ02-05*01
TCCACAAAGCTGGAGGACTCAGCCATGTACTTCTGTGCCAGCAGGACCCAGGACAGGGGAGTCAATCAGCCCCAGCATTTTGGTGAT	CASRTQDRGVNQPQHF	4	4.59712e-05	TCRBV02-01*01	TCRBD01-01*01	TCRBJ01-05*01
GAGCTGGGGGACTCAGCTTTGTATTTCTGTGCCAGCAGCGTAGCTACGTCTAGCGGGGGGGCTTCAGATACGCAGTATTTTGGCCCA	CASSVATSSGGASDTQYF	4	4.59712e-05	TCRBV09-01	TCRBD02-01*01	TCRBJ02-03*01
AGCTCTCTGGAGCTGGGGGACTCAGCTTTGTATTTCTGTGCCAGCAGCGTAGGTTCAGGGGGCGCCTCTGAAGCTTTCTTTGGACAA	CASSVGSGGASEAFF	4	4.59712e-05	TCRBV09-01	TCRBD01-01*01	TCRBJ01-01*01
GAACTAAACCTGAGCTCTCTGGAGCTGGGGGACTCAGCTTTGTATTTCTGTGCCAGCAGCGTAGGGAATGAGCAGTTCTTCGGGCCA	CASSVGNEQFF	4	4.59712e-05	TCRBV09-01		TCRBJ02-01*01
TCTCTGGAGCTGGGGGACTCAGCTTTGTATTTCTGTGCCAGCAGCTTTAGCGGGGGGGCCGGGGTAGGGACCCAGTACTTCGGGCCA	CASSFSGGAGVGTQYF	4	4.59712e-05	TCRBV09-01	TCRBD02-01*01	TCRBJ02-05*01
TCTCTGGAGCTGGGGGACTCAGCTTTGTATTTCTGTGCCAGCAGCCCCCGGGACAGGGTGGCTTCTAATGGCTACACCTTCGGTTCG	CASSPRDRVASNGYTF	4	4.59712e-05	TCRBV09-01	TCRBD01-01*01	TCRBJ01-02*01
TTGGAGCTGGACGACTCGGCCCTGTATCTCTGTGCCAGCAGCTCCGGGACTGTGAGCTCTGGGGCCAACGTCCTGACTTTCGGGGCC	CASSSGTVSSGANVLTF	4	4.59712e-05	TCRBV05-04*01	TCRBD02-01	TCRBJ02-06*01
TCTGAGCTGAATGTGAACGCCTTGGAGCTGGACGACTCGGCCCTGTATCTCTGTGCCAGCAGCTTTGGGGTAGCTTTCTTTGGACAA	CASSFGVAFF	4	4.59712e-05	TCRBV05-04*01		TCRBJ01-01*01
GAGTCGGCTGCTCCCTCCCAGACATCTGTGTACTTCTGTGCCAGCAGTGTCCAGCGGGGGGCCTACAATGAGCAGTTCTTCGGGCCA	CASSVQRGAYNEQFF	4	4.59712e-05	TCRBV06-01*01	TCRBD02-01*01	TCRBJ02-01*01
GCTGCTCCCTCCCAGACATCTGTGTACTTCTGTGCCAGCAGTGAAAACCTAAGGACAGGGGGAGTCTACGAGCAGTACTTCGGGCCG	CASSENLRTGGVYEQYF	4	4.59712e-05	TCRBV06-01*01	TCRBD01-01*01	TCRBJ02-07*01
GAGTCGGCTGCTCCCTCCCAGACATCTGTGTACTTCTGTGCCAGCAGTGAAATGGAGGAGGGAACCTACGAGCAGTACTTCGGGCCG	CASSEMEEGTYEQYF	4	4.59712e-05	TCRBV06-01*01	TCRBD02-01*02	TCRBJ02-07*01
AGGCTGGAGTCGGCTGCTCCCTCCCAGACATCTGTGTACTTCTGTGCCAGCAGTGAATCAACAGGGAATGGCTACACCTTCGGTTCG	CASSESTGNGYTF	4	4.59712e-05	TCRBV06-01*01	TCRBD01-01*01	TCRBJ01-02*01
CTGGAGTCGGCTGCTCCCTCCCAGACATCTGTGTACTTCTGTGCCAGCACGCTGGACAGGTCATCTTACGAGCAGTACTTCGGGCCG	CASTLDRSSYEQYF	4	4.59712e-05	TCRBV06-01*01	TCRBD01-01*01	TCRBJ02-07*01
TCGGCTGCTCCCTCCCAGACATCTGTGTACTTCTGTGCCAGCAGTGAATGGGGTGGACAGCCCTACAATGAGCAGTTCTTCGGGCCA	CASSEWGGQPYNEQFF	4	4.59712e-05	TCRBV06-01*01	TCRBD01-01*01	TCRBJ02-01*01
GAGTCGGCTGCTCCCTCCCAGACATCTGTGTACTTCTGTGCCAGCAGTGAAAAAGCGGGGGGTTACGGGGAGCTGTTTTTTGGAGAA	CASSEKAGGYGELFF	4	4.59712e-05	TCRBV06-01*01	TCRBD02-01*01	TCRBJ02-02*01
GAGTCGGCTGCTCCCTCCCAGACATCTGTGTACTTCTGTGCCAGCAGGGCGGGGGACAGGGTGTTCTATGAGCAGTTCTTCGGGCCA	CASRAGDRVFYEQFF	4	4.59712e-05	TCRBV06-01*01	TCRBD01-01*01	TCRBJ02-01*01
CTGGAGTCGGCTGCTCCCTCCCAGACATCTGTGTACTTCTGTGCCAGCAGTGAGGGGCAGGGGGCAGATACGCAGTATTTTGGCCCA	CASSEGQGADTQYF	4	4.59712e-05	TCRBV06-01*01	TCRBD01-01*01	TCRBJ02-03*01
GAGTCGGCTGCTCCCTCCCAGACATCTGTGTACTTCTGTGCCAGCAGTGAGGAAGGGACAGGACCTCAGCCCCAGCATTTTGGTGAT	CASSEEGTGPQPQHF	4	4.59712e-05	TCRBV06-01*01	TCRBD01-01*01	TCRBJ01-05*01
CTGGAGTCGGCTGCTCCCTCCCAGACATCTGTGTACTTCTGTGCCAGCACCCGAGGAGGAGCGGGGGATGAGCAGTTCTTCGGGCCA	CASTRGGAGDEQFF	4	4.59712e-05	TCRBV06-01*01	TCRBD02-01*01	TCRBJ02-01*01
GAGTCGGCTGCTCCCTCCCAGACATCTGTGTACTTCTGTGCCAGCAGTCTTAAGACAGGGGGCTATCAGCCCCAGCATTTTGGTGAT	CASSLKTGGYQPQHF	4	4.59712e-05	TCRBV06-01*01	TCRBD01-01*01	TCRBJ01-05*01
CTGGAGTCGGCTGCTCCCTCCCAGACATCTGTGTACTTCTGTGCCAGCAGTGCGGAGACAGGGAATTCACCCCTCCACTTTGGGAAC	CASSAETGNSPLHF	4	4.59712e-05	TCRBV06-01*01	TCRBD01-01*01	TCRBJ01-06*01
TCGGCTGCTCCCTCCCAGACATCTGTGTACTTCTGTGCCAGCAGTGAAGGCCACTTCCCTCATAGGAACATTCAGTACTTCGGCGCC	CASSEGHFPHRNIQYF	4	4.59712e-05	TCRBV06-01*01		TCRBJ02-04*01
GAGTCGGCTGCTCCCTCCCAGACATCTGTGTACTTCTGTGCCAGCAGGCAACAGGGCAACTATAATTCACCCCTCCACTTTGGGAAC	CASRQQGNYNSPLHF	4	4.59712e-05	TCRBV06-01*01	TCRBD01-01*01	TCRBJ01-06*01
GAGTCGGCTGCTCCCTCCCAGACATCTGTGTACTTCTGTGCCAGCAGTGAACAGCGGGGGGGATACAATGAGCAGTTCTTCGGGCCA	CASSEQRGGYNEQFF	4	4.59712e-05	TCRBV06-01*01	TCRBD02-01*01	TCRBJ02-01*01
TCGGCTGCTCCCTCCCAGACATCTGTGTACTTCTGTGCCAGCAGTGAATATCGGGGCCCGACCTACAATGAGCAGTTCTTCGGGCCA	CASSEYRGPTYNEQFF	4	4.59712e-05	TCRBV06-01*01		TCRBJ02-01*01
GAGTCGGCTGCTCCCTCCCAGACATCTGTGTACTTCTGTGCCAGCAGTGAAGCAAGGGGGGGGACAGATACGCAGTATTTTGGCCCA	CASSEARGGTDTQYF	4	4.59712e-05	TCRBV06-01*01	TCRBD02-01*01	TCRBJ02-03*01
GCCTTGGAGCTGGAGGACTCGGCCCTGTATCTCTGTGCCAGCAGCTACCATAGCGGATTAAACACCGGGGAGCTGTTTTTTGGAGAA	CASSYHSGLNTGELFF	4	4.59712e-05	TCRBV05-08*01	TCRBD02-01	TCRBJ02-02*01
AATGCCTTGGAGCTGGAGGACTCGGCCCTGTATCTCTGTGCCAGCAGCTCGGGACAGAAGATCAATCAGCCCCAGCATTTTGGTGAT	CASSSGQKINQPQHF	4	4.59712e-05	TCRBV05-08*01	TCRBD01-01*01	TCRBJ01-05*01
AATGTGAATGCCTTGGAGCTGGAGGACTCGGCCCTGTATCTCTGTGCCAGCAGCCGACAGGGGCGGAACGAGCAGTACTTCGGGCCG	CASSRQGRNEQYF	4	4.59712e-05	TCRBV05-08*01	TCRBD01-01*01	TCRBJ02-07*01
CTGAATGTGAATGCCTTGGAGCTGGAGGACTCGGCCCTGTATCTCTGTGCCAGCAGGGGGGCGGGGTCTACCCAGTACTTCGGGCCA	CASRGAGSTQYF	4	4.59712e-05	TCRBV05-08*01		TCRBJ02-05*01
GTGAACGCCTTGTTGCTGGGGGACTCGGCCCTCTATCTCTGTGCCAGCAGCCTGGGACAGAGGGGCACTGAAGCTTTCTTTGGACAA	CASSLGQRGTEAFF	4	4.59712e-05	TCRBV05-06*01		TCRBJ01-01*01
GAGCTGAATGTGAACGCCTTGTTGCTGGGGGACTCGGCCCTCTATCTCTGTGCCAGCAGCCGGACGGAGACCCAGTACTTCGGGCCA	CASSRTETQYF	4	4.59712e-05	TCRBV05-06*01		TCRBJ02-05*01
TTGTTGCTGGGGGACTCGGCCCTCTATCTCTGTGCCAGCAGCTTGGATGCTGGGTCTGGCGGGGGGGATGAGCAGTTCTTCGGGCCA	CASSLDAGSGGGDEQFF	4	4.59712e-05	TCRBV05-06*01	TCRBD02-01*01	TCRBJ02-01*01
AATGTGAACGCCTTGTTGCTGGGGGACTCGGCCCTCTATCTCTGTGCCAGCAGCTTGGGTAGGGGTAATGAGCAGTTCTTCGGGCCA	CASSLGRGNEQFF	4	4.59712e-05	TCRBV05-06*01	TCRBD01-01*01	TCRBJ02-01*01
AACGCCTTGTTGCTGGGGGACTCGGCCCTCTATCTCTGTGCCAGCAGCCGCAGGGGACTAGCCGGCCACGAGCAGTACTTCGGGCCG	CASSRRGLAGHEQYF	4	4.59712e-05	TCRBV05-06*01	TCRBD02-01	TCRBJ02-07*01
TTGCTGGGGGACTCGGCCCTCTATCTCTGTGCCAGCAGCTTGCCCGCTAACTGGAGGACCTCCTACAATGAGCAGTTCTTCGGGCCA	CASSLPANWRTSYNEQFF	4	4.59712e-05	TCRBV05-06*01	TCRBD02-01*02	TCRBJ02-01*01
GAGCTGAATGTGAACGCCTTGTTGCTGGGGGACTCGGCCCTCTATCTCTGTGCCAGCAGCTTGGACGGCCCGCAGTACTTCGGCGCC	CASSLDGPQYF	4	4.59712e-05	TCRBV05-06*01		TCRBJ02-04*01
GTGAACGCCTTGTTGCTGGGGGACTCGGCCCTCTATCTCTGTGCCAGCAGCTTGGCAGGGTACACCTACGAGCAGTACTTCGGGCCG	CASSLAGYTYEQYF	4	4.59712e-05	TCRBV05-06*01	TCRBD01-01*01	TCRBJ02-07*01
GTGAACGCCTTGTTGCTGGGGGACTCGGCCCTCTATCTCTGTGCCAGCAGTTGGAGGGTTGGTACCCAGCCCCAGCATTTTGGTGAT	CASSWRVGTQPQHF	4	4.59712e-05	TCRBV05-06*01	TCRBD02-01*02	TCRBJ01-05*01
GTGAACGCCTTGTTGCTGGGGGACTCGGCCCTCTATCTCTGTGCCAGCAGCCGCCAGGGCATAAACTATGGCTACACCTTCGGTTCG	CASSRQGINYGYTF	4	4.59712e-05	TCRBV05-06*01	TCRBD01-01*01	TCRBJ01-02*01
AACGCCTTGTTGCTGGGGGACTCGGCCCTCTATCTCTGTGCCAGCAGCCTCGGGACAGGGGGAAGTCAGCCCCAGCATTTTGGTGAT	CASSLGTGGSQPQHF	4	4.59712e-05	TCRBV05-06*01	TCRBD01-01*01	TCRBJ01-05*01
AACGCCTTGTTGCTGGGGGACTCGGCCCTCTATCTCTGTGCCAGCAGCTTGGCCCCAGGGGCGGGGGAAAAACTGTTTTTTGGCAGT	CASSLAPGAGEKLFF	4	4.59712e-05	TCRBV05-06*01		TCRBJ01-04*01
CACGCCCTGCAGCCAGAAGACTCAGCCCTGTATCTCTGCGCCAGCAGCCAAGGTCGCACCGGCAATCAGCCCCAGCATTTTGGTGAT	CASSQGRTGNQPQHF	4	4.59712e-05	TCRBV04-01*01		TCRBJ01-05*01
CAGCCAGAAGACTCAGCCCTGTATCTCTGCGCCAGCAGCCAAGATCGGACTAGCGGGGGATACACAGATACGCAGTATTTTGGCCCA	CASSQDRTSGGYTDTQYF	4	4.59712e-05	TCRBV04-01*01	TCRBD02-01*01	TCRBJ02-03*01
CTTCACCTACACGCCCTGCAGCCAGAAGACTCAGCCCTGTATCTCTGCGCCAGCAGCGGGCGCAGCAACGAGCAGTACTTCGGGCCG	CASSGRSNEQYF	4	4.59712e-05	TCRBV04-01*01	TCRBD01-01*01	TCRBJ02-07*01
CACGCCCTGCAGCCAGAAGACTCAGCCCTGTATCTCTGCGCCAGCAGCCTAGGCTTATTGGGCGGGGAGACCCAGTACTTCGGGCCA	CASSLGLLGGETQYF	4	4.59712e-05	TCRBV04-01*01	TCRBD02-01	TCRBJ02-05*01
GCCCTGCAGCCAGAAGACTCAGCCCTGTATCTCTGCGCCAGCAGCCAAGGACAGGGTGGGATGTACTACGAGCAGTACTTCGGGCCG	CASSQGQGGMYYEQYF	4	4.59712e-05	TCRBV04-01*01	TCRBD01-01*01	TCRBJ02-07*01
TCAGCCCTGTATCTCTGCGCCAGCAGCCAAGATTGGAGGCTAGCGGGGAACCGACCCCAATACTACAATGAGCAGTTCTTCGGGCCA	CASSQDWRLAGNRPQYYNEQFF	4	4.59712e-05	TCRBV04-01*01	TCRBD02-01*01	TCRBJ02-01*01
CTACACGCCCTGCAGCCAGAAGACTCAGCCCTGTATCTCTGCGCCAGCAGCCGTCAGGGTAAACAAGAGACCCAGTACTTCGGGCCA	CASSRQGKQETQYF	4	4.59712e-05	TCRBV04-01*01	TCRBD01-01*01	TCRBJ02-05*01
CTGCAGCCAGAAGACTCAGCCCTGTATCTCTGCGCCAGCAGCCACCCGGGACTACAAACTAGCACAGATACGCAGTATTTTGGCCCA	CASSHPGLQTSTDTQYF	4	4.59712e-05	TCRBV04-01*01	TCRBD02-01	TCRBJ02-03*01
CAGCCAGAAGACTCAGCCCTGTATCTCTGCGCCAGCAGCCAAGGACCCGCGGGACTAGCGAGGACCGGGGAGCTGTTTTTTGGAGAA	CASSQGPAGLARTGELFF	4	4.59712e-05	TCRBV04-01*01	TCRBD02-01	TCRBJ02-02*01
CACGCCCTGCAGCCAGAAGACTCAGCCCTGTATCTCTGCGCCAGCAGCCAGGTGGACACTAACACCGGGGAGCTGTTTTTTGGAGAA	CASSQVDTNTGELFF	4	4.59712e-05	TCRBV04-01*01	TCRBD01-01*01	TCRBJ02-02*01
CACGCCCTGCAGCCAGAAGACTCAGCCCTGTATCTCTGCGCCAGCGGGGGCGAGGCCCTAGTAGCCGGGGAGCTGTTTTTTGGAGAA	CASGGEALVAGELFF	4	4.59712e-05	TCRBV04-01*01	TCRBD01-01*01	TCRBJ02-02*01
CTACACGCCCTGCAGCCAGAAGACTCAGCCCTGTATCTCTGCGCCAGCAGCCTCGGACAGGGTACCGGGGAGCTGTTTTTTGGAGAA	CASSLGQGTGELFF	4	4.59712e-05	TCRBV04-01*01	TCRBD01-01*01	TCRBJ02-02*01
CACCTACACGCCCTGCAGCCAGAAGACTCAGCCCTGTATCTCTGCGCCAGCAGCCAAGAGGGAGGGCAGCCCCAGCATTTTGGTGAT	CASSQEGGQPQHF	4	4.59712e-05	TCRBV04-01*01	TCRBD02-01*02	TCRBJ01-05*01
CTACACGCCCTGCAGCCAGAAGACTCAGCCCTGTATCTCTGCGCCAGCAGACCTCTTGGTTTCGGGGAAAAACTGTTTTTTGGCAGT	CASRPLGFGEKLFF	4	4.59712e-05	TCRBV04-01*01	TCRBD02-01	TCRBJ01-04*01
CACGCCCTGCAGCCAGAAGACTCAGCCCTGTATCTCTGCGCCAGCAGCCACGTCAGGCAGGGTCCCCAGACCCAGTACTTCGGGCCA	CASSHVRQGPQTQYF	4	4.59712e-05	TCRBV04-01*01	TCRBD01-01*01	TCRBJ02-05*01
CTACACGCCCTGCAGCCAGAAGACTCAGCCCTGTATCTCTGCGCCAGCAGCCAGGGAGGGTTTACCGGGGAGCTGTTTTTTGGAGAA	CASSQGGFTGELFF	4	4.59712e-05	TCRBV04-01*01	TCRBD02-01*02	TCRBJ02-02*01
CACGCCCTGCAGCCAGAAGACTCAGCCCTGTATCTCTGCGCCAGCAGCCAAGATGCGGTAGCCAAAAACATTCAGTACTTCGGCGCC	CASSQDAVAKNIQYF	4	4.59712e-05	TCRBV04-01*01	TCRBD02-01	TCRBJ02-04*01
CTGCAGCCAGAAGACTCGGCCCTGTATCTCTGCGCCAGCAGCCAATCGACAGGGAGTAATACTGGAAACACCATATATTTTGGAGAG	CASSQSTGSNTGNTIYF	4	4.59712e-05	TCRBV04-03*01	TCRBD01-01*01	TCRBJ01-03*01
CTACACACCCTGCAGCCAGAAGACTCGGCCCTGTATCTCTGCGCCAGCAGACAGGGGCCGAACACCGGGGAGCTGTTTTTTGGAGAA	CASRQGPNTGELFF	4	4.59712e-05	TCRBV04-03*01	TCRBD01-01*01	TCRBJ02-02*01
ACCCTGCAGCCAGAAGACTCGGCCCTGTATCTCTGCGCCAGCAGCCAAGATCGGGGGGCCAATTCCTACGAGCAGTACTTCGGGCCG	CASSQDRGANSYEQYF	4	4.59712e-05	TCRBV04-03*01	TCRBD02-01*01	TCRBJ02-07*01
AGGCTGGAGTTGGCTGCTCCCTCCCAGACATCTGTGTACTTCTGTGCCAGCAGACAAGGGATGAACACTGAAGCTTTCTTTGGACAA	CASRQGMNTEAFF	4	4.59712e-05	TCRBV06-06		TCRBJ01-01*01
AGGCTGGAGTTGGCTGCTCCCTCCCAGACATCTGTGTACTTCTGTGCCAGCAGTTACAGGGAAACAGATACGCAGTATTTTGGCCCA	CASSYRETDTQYF	4	4.59712e-05	TCRBV06-06		TCRBJ02-03*01
AAGCTGGAGGACTCAGCCATGTACTTCTGTGCCAGCAGTGAAGCAGAGACAGGGGGCCTGATGAACACTGAAGCTTTCTTTGGACAA	CASSEAETGGLMNTEAFF	4	4.59712e-05	TCRBV02-01*01	TCRBD01-01*01	TCRBJ01-01*01
TCCACAAAGCTGGAGGACTCAGCCATGTACTTCTGTGCCAGCAGTGAAAGGCTAGCGGGGGACACAGATACGCAGTATTTTGGCCCA	CASSERLAGDTDTQYF	4	4.59712e-05	TCRBV02-01*01	TCRBD02-01*01	TCRBJ02-03*01
CGGTCCACAAAGCTGGAGGACTCAGCCATGTACTTCTGTGCCAGCAGGGCGATACGGGGAGAAGGTGAAAAACTGTTTTTTGGCAGT	CASRAIRGEGEKLFF	4	4.59712e-05	TCRBV02-01*01	TCRBD02-01	TCRBJ01-04*01
ATCCGGTCCACAAAGCTGGAGGACTCAGCCATGTACTTCTGTGCCAGCAGCGGAGGACAGCTGAACACTGAAGCTTTCTTTGGACAA	CASSGGQLNTEAFF	4	4.59712e-05	TCRBV02-01*01	TCRBD01-01*01	TCRBJ01-01*01
AAGATCCGGTCCACAAAGCTGGAGGACTCAGCCATGTACTTCTGTGCCAGCAGTCAGGGAGAGAACACTGAAGCTTTCTTTGGACAA	CASSQGENTEAFF	4	4.59712e-05	TCRBV02-01*01		TCRBJ01-01*01
ATCCGGTCCACAAAGCTGGAGGACTCAGCCATGTACTTCTGTGCCAGCAGTGATTGGGGACTAGGGACTGAAGCTTTCTTTGGACAA	CASSDWGLGTEAFF	4	4.59712e-05	TCRBV02-01*01	TCRBD02-01	TCRBJ01-01*01
CGGTCCACAAAGCTGGAGGACTCAGCCATGTACTTCTGTGCCAGCAGTGAAGGCCGGACAGGGAACACTGAAGCTTTCTTTGGACAA	CASSEGRTGNTEAFF	4	4.59712e-05	TCRBV02-01*01	TCRBD01-01*01	TCRBJ01-01*01
ATCCGGTCCACAAAGCTGGAGGACTCAGCCATGTACTTCTGTGCCAGCATAGGGACCCCTTCGTGGTATGGCTACACCTTCGGTTCG	CASIGTPSWYGYTF	4	4.59712e-05	TCRBV02-01*01		TCRBJ01-02*01
TCTCTGGAGCTGGGGGACTCAGCTTTGTATTTCTGTGCCAGCAGCGTAGCCAAGGGGGACGCGGGCACTGAAGCTTTCTTTGGACAA	CASSVAKGDAGTEAFF	4	4.59712e-05	TCRBV09-01	TCRBD01-01*01	TCRBJ01-01*01
CTGGAGCTGGGGGACTCAGCTTTGTATTTCTGTGCCAGCAGCGTAGGTGGGTCAGGGCCCGTCCAAGAGACCCAGTACTTCGGGCCA	CASSVGGSGPVQETQYF	4	4.59712e-05	TCRBV09-01	TCRBD01-01*01	TCRBJ02-05*01
AGCTCTCTGGAGCTGGGGGACTCAGCTTTGTATTTCTGTGCCAGCAGCGCCCGTGGGGACAGCCAAGAGACCCAGTACTTCGGGCCA	CASSARGDSQETQYF	4	4.59712e-05	TCRBV09-01	TCRBD01-01*01	TCRBJ02-05*01
CTGAGCTCTCTGGAGCTGGGGGACTCAGCTTTGTATTTCTGTGCCAGCAGCGTAGGGACAGTTAATCAGCCCCAGCATTTTGGTGAT	CASSVGTVNQPQHF	4	4.59712e-05	TCRBV09-01	TCRBD01-01*01	TCRBJ01-05*01
AACCTGAGCTCTCTGGAGCTGGGGGACTCAGCTTTGTATTTCTGTGCCAGCAGCCCCGGAGGGCCCTATGGCTACACCTTCGGTTCG	CASSPGGPYGYTF	4	4.59712e-05	TCRBV09-01	TCRBD02-01*02	TCRBJ01-02*01
AGCTCTCTGGAGCTGGGGGACTCAGCTTTGTATTTCTGTGCCAGCAGCGTAGGGGGGACAGGGGGATCCGAGCAGTACTTCGGGCCG	CASSVGGTGGSEQYF	4	4.59712e-05	TCRBV09-01	TCRBD01-01*01	TCRBJ02-07*01
TCTCTGGAGCTGGGGGACTCAGCTTTGTATTTCTGTGCCAGCAGCGCAACTAGCGGGGGGTTCGCAGATACGCAGTATTTTGGCCCA	CASSATSGGFADTQYF	4	4.59712e-05	TCRBV09-01	TCRBD02-01*01	TCRBJ02-03*01
CTGGAGCTGGGGGACTCAGCTTTGTATTTCTGTGCCAGCAGCCCGCGACTGGGTCGGTTGAACACCGGGGAGCTGTTTTTTGGAGAA	CASSPRLGRLNTGELFF	4	4.59712e-05	TCRBV09-01	TCRBD02-01	TCRBJ02-02*01
AGCTCTCTGGAGCTGGGGGACTCAGCTTTGTATTTCTGTGCCAGCAGCGTACCGAGCTCAGGCACCGGGGAGCTGTTTTTTGGAGAA	CASSVPSSGTGELFF	4	4.59712e-05	TCRBV09-01	TCRBD01-01*01	TCRBJ02-02*01
TCTCTGGAGCTGGGGGACTCAGCTTTGTATTTCTGTGCCAGCAGCGTAGCCCCTCGGGAAGCTAATGAAAAACTGTTTTTTGGCAGT	CASSVAPREANEKLFF	4	4.59712e-05	TCRBV09-01	TCRBD02-01*02	TCRBJ01-04*01
TCTCTGGAGCTGGGGGACTCAGCTTTGTATTTCTGTGCCAGCAGCGTACCCGGGGCGGGGGCCGAAGATACGCAGTATTTTGGCCCA	CASSVPGAGAEDTQYF	4	4.59712e-05	TCRBV09-01	TCRBD02-01*01	TCRBJ02-03*01
TCTCTGGAGCTGGGGGACTCAGCTTTGTATTTCTGTGCCAGCAGCCTCCGTCGTAGCGGGAAATACAATGAGCAGTTCTTCGGGCCA	CASSLRRSGKYNEQFF	4	4.59712e-05	TCRBV09-01	TCRBD02-01*02	TCRBJ02-01*01
TCTCTGGAGCTGGGGGACTCAGCTTTGTATTTCTGTGCCAGCAGCGTACAGACTAGCGGTCCTTACAATGAGCAGTTCTTCGGGCCA	CASSVQTSGPYNEQFF	4	4.59712e-05	TCRBV09-01	TCRBD02-01	TCRBJ02-01*01
TCTCTGGAGCTGGGGGACTCAGCTTTGTATTTCTGTGCCAGCAGCGTAGGGCCAGCGGGGGTCCACAATGAGCAGTTCTTCGGGCCA	CASSVGPAGVHNEQFF	4	4.59712e-05	TCRBV09-01	TCRBD02-01*01	TCRBJ02-01*01
CTCAAGATCCAGCCTGCAGAGCTTGGGGACTCGGCCATGTATCTCTGTGCCAGCAGCTTATATGGGGGAGAGCAGTACTTCGGGCCG	CASSLYGGEQYF	4	4.59712e-05	TCRBV11-01*01		TCRBJ02-07*01
GTGAACGCCTTGGAGCTGGACGACTCGGCCCTGTATCTCTGTGCCAGCAGTCTGACCGGGATGAACACTGAAGCTTTCTTTGGACAA	CASSLTGMNTEAFF	4	4.59712e-05	TCRBV05-04*01	TCRBD02-01*02	TCRBJ01-01*01
AATGTGAACGCCTTGGAGCTGGACGACTCGGCCCTGTATCTCTGCGCCAGCAGCTCCGGGACGGACTACGAGCAGTACTTCGGGCCG	CASSSGTDYEQYF	4	4.59712e-05	TCRBV05-04*01		TCRBJ02-07*01
AACGCCTTGGAGCTGGACGACTCGGCCCTGTATCTCTGTGCCAGCAGCTTGGGGGACGTTAGGACAGATACGCAGTATTTTGGCCCA	CASSLGDVRTDTQYF	4	4.59712e-05	TCRBV05-04*01		TCRBJ02-03*01
GAGCTGGACGACTCGGCCCTGTATCTCTGTGCCAGCAGCTTGGCGATAGGCGGTAGCTCCTATAATTCACCCCTCCACTTTGGGAAC	CASSLAIGGSSYNSPLHF	4	4.59712e-05	TCRBV05-04*01	TCRBD02-01	TCRBJ01-06*01
GCCTTGGAGCTGGACGACTCGGCCCTGTATCTCTGTGCCAGCAGCTTGGATATAGGGAGAAAATACAATGAGCAGTTCTTCGGGCCA	CASSLDIGRKYNEQFF	4	4.59712e-05	TCRBV05-04*01	TCRBD02-01*02	TCRBJ02-01*01
AACGCCTTGGAGCTGGACGACTCGGCCCTGTATCTCTGTGCCAGCAGCTTGACTGGGACGACATCCTACGAGCAGTACTTCGGGCCG	CASSLTGTTSYEQYF	4	4.59712e-05	TCRBV05-04*01		TCRBJ02-07*01
GCCTTGGAGCTGGACGACTCGGCCCTGTATCTCTGTGCCAGCAGCCTCCGGGGGACAGTCTCTGGAAACACCATATATTTTGGAGAG	CASSLRGTVSGNTIYF	4	4.59712e-05	TCRBV05-04*01	TCRBD01-01*01	TCRBJ01-03*01
GCCTTGGAGCTGGACGACTCGGCCCTGTATCTCTGTGCCAGCAGCGCGGGGGGAACAAACTCTGGAAACACCATATATTTTGGAGAG	CASSAGGTNSGNTIYF	4	4.59712e-05	TCRBV05-04*01	TCRBD02-01*01	TCRBJ01-03*01
AATGTGAACGCCTTGGAGCTGGACGACTCGGCCCTGTATCTCTGTGCCAGCAGCTTAGGGGGCACGGGTGAAGCTTTCTTTGGACAA	CASSLGGTGEAFF	4	4.59712e-05	TCRBV05-04*01	TCRBD01-01*01	TCRBJ01-01*01
TTGGAGCTGGACGACTCGGCCCTGTATCTCTGTGCCAGCAGCCCATCCTCGGGGACTAGCGAGGTCCACGAGCAGTTCTTCGGGCCA	CASSPSSGTSEVHEQFF	4	4.59712e-05	TCRBV05-04*01	TCRBD02-01	TCRBJ02-01*01
TCGGCTGCTCCCTCCCAGACATCTGTGTACTTCTGTGCCAGCAGTGAAGACAGTAGCTCCTATAATTCACCCCTCCACTTTGGGAAC	CASSEDSSSYNSPLHF	4	4.59712e-05	TCRBV06-01*01	TCRBD01-01*01	TCRBJ01-06*01
GAGTCGGCTGCTCCCTCCCAGACATCTGTGTACTTCTGTGCCAGCAGTGAAGAGGTAGCGGGGGGCTACGAGCAGTACTTCGGGCCG	CASSEEVAGGYEQYF	4	4.59712e-05	TCRBV06-01*01	TCRBD02-01*01	TCRBJ02-07*01
TCGGCTGCTCCCTCCCAGACATCTGTGTACTTCTGTGCCAGCAGTGAAGCGGGGCAGGCGGAGGGCTATGGCTACACCTTCGGTTCG	CASSEAGQAEGYGYTF	4	4.59712e-05	TCRBV06-01*01	TCRBD02-01*02	TCRBJ01-02*01
TCGCTCAGGCTGGAGTCGGCTGCTCCCTCCCAGACATCTGTGTACTTCTGTGCCAGCAGTCTTCGCTACGAGCAGTACTTCGGGCCG	CASSLRYEQYF	4	4.59712e-05	TCRBV06-01*01	TCRBD02-01	TCRBJ02-07*01
GAGTCGGCTGCTCCCTCCCAGACATCTGTGTACTTCTGTGCCAGCAGTGTGGAGGGGTCGGGCAATCAGCCCCAGCATTTTGGTGAT	CASSVEGSGNQPQHF	4	4.59712e-05	TCRBV06-01*01	TCRBD02-01*02	TCRBJ01-05*01
TCGGCTGCTCCCTCCCAGACATCTGTGTACTTCTGTGCCAGCAGTGAATCACTAGCGGGGGGCACAGATACGCAGTATTTTGGCCCA	CASSESLAGGTDTQYF	4	4.59712e-05	TCRBV06-01*01	TCRBD02-01*01	TCRBJ02-03*01
TCGCTCAGGCTGGAGTCGGCTGCTCCCTCCCAGACATCTGTGTACTTCTGTGCCACGGGACAGGGCTACGAGCAGTACTTCGGGCCG	CATGQGYEQYF	4	4.59712e-05	TCRBV06-01*01	TCRBD01-01*01	TCRBJ02-07*01
AAGATCCAGCGCACAGAGCGGGGGGACTCAGCCGTGTATCTCTGTGCCAGCAGCTCGACAGGCACAGATACGCAGTATTTTGGCCCA	CASSSTGTDTQYF	4	4.59712e-05	TCRBV07-03*01	TCRBD01-01*01	TCRBJ02-03*01
AAGATCCAGCGCACAGAGCGGGGGGACTCAGCCGTGTATCTCTGTGCCAGCAGCTTAACTGTGGGGGATACGCAGTATTTTGGCCCA	CASSLTVGDTQYF	4	4.59712e-05	TCRBV07-03*01		TCRBJ02-03*01
AAGATCCAGCGCACAGAGCGGGGGGACTCAGCCGTGTATCTCTGTGCCAGCAGCTTAGGAGGGGTAGAGACCCAGTACTTCGGGCCA	CASSLGGVETQYF	4	4.59712e-05	TCRBV07-03*01	TCRBD02-01*02	TCRBJ02-05*01
ATCCAGCGCACAGAGCGGGGGGACTCAGCCGTGTATCTCTGTGCCAGCAGCTTATCACTAGGAGGGGGGACCCAGTACTTCGGGCCA	CASSLSLGGGTQYF	4	4.59712e-05	TCRBV07-03*01		TCRBJ02-05*01
ACAGAGCGGGGGGACTCAGCCGTGTATCTCTGTGCCAGCAGCCTTAACAGGGAATTCCTCTTTAACTATGGCTACACCTTCGGTTCG	CASSLNREFLFNYGYTF	4	4.59712e-05	TCRBV07-03*01	TCRBD01-01*01	TCRBJ01-02*01
CTGGAGTCTGCTGCCTCCTCCCAGACATCTGTATATTTCTGCGCCAGCAGTGAGTCACTAGCGGGGGGGCCCAAGTTCTTCGGGCCA	CASSESLAGGPKFF	4	4.59712e-05	TCRBV10-01	TCRBD02-01*01	TCRBJ02-01*01
CTGGAGTCTGCTGCCTCCTCCCAGACATCTGTATATTTCTGCGCCAGCAGTCAGGGACAGGTGGGCACTGAAGCTTTCTTTGGACAA	CASSQGQVGTEAFF	4	4.59712e-05	TCRBV10-01	TCRBD01-01*01	TCRBJ01-01*01
CTGGAGTCTGCTGCCTCCTCCCAGACATCTGTATATTTCTGCGCCAGCAGTGCGGGGGACACAAATTCACCCCTCCACTTTGGGAAC	CASSAGDTNSPLHF	4	4.59712e-05	TCRBV10-01		TCRBJ01-06*01
CTGCTGTCGGCTGCTCCCTCCCAGACATCTGTGTACTTCTGTGCCAGCAGCTACCACGGGGGTCCCTACGAGCAGTACTTCGGGCCG	CASSYHGGPYEQYF	4	4.59712e-05	TCRBV06-05*01	TCRBD02-01*01	TCRBJ02-07*01
GAGTTGGCTGCTCCCTCCCAGACATCTGTGTACTTCTGTGCCAGCAGTCCTCGCGGGGGATCCTACAATGAGCAGTTCTTCGGGCCA	CASSPRGGSYNEQFF	4	4.59712e-05	TCRBV06-06	TCRBD02-01*01	TCRBJ02-01*01
AGGCTGGAGTTGGCTGCTCCCTCCCAGACATCTGTGTACTTCTGTGCCAGCAGTTACTCTGGGGCCAACGTCCTGACTTTCGGGGCC	CASSYSGANVLTF	4	4.59712e-05	TCRBV06-06		TCRBJ02-06*01
AGGCTGGAGTCGGCTGCTCCCTCCCAGACATCTGTGTACTTCTGTGCCAGCAGTTACTACGGGGGAGAGACCCAGTACTTCGGGCCA	CASSYYGGETQYF	4	4.59712e-05	TCRBV06-06	TCRBD02-01*01	TCRBJ02-05*01
CTCAGGCTGGAGTTGGCTGCTCCCTCCCAGACATCTGTGTACTTCTGTGCCAGCAGTTATGGTCCAGATACGCAGTATTTTGGCCCA	CASSYGPDTQYF	4	4.59712e-05	TCRBV06-06		TCRBJ02-03*01
GAGTTGGCTGCTCCCTCCCAGACATCTGTGTACTTCTGTGCCAGCAGTCCCCTGGGCGGGATCACAGATACGCAGTATTTTGGCCCA	CASSPLGGITDTQYF	4	4.59712e-05	TCRBV06-06	TCRBD02-01*02	TCRBJ02-03*01
GAGTTGGCTGCTCCCTCCCAGACATCTGTGTACTTCTGTGCCAGCAGTACCCGCAGGGGCCTCAGTCAGCCCCAGCATTTTGGTGAT	CASSTRRGLSQPQHF	4	4.59712e-05	TCRBV06-06	TCRBD01-01*01	TCRBJ01-05*01
GAGTTGGCTGCTCCCTCCCAGACATCTGTGTACTTCTGTGCCAGCAGACCTACTAGCGGGGGATCCAATGAGCAGTTCTTCGGGCCA	CASRPTSGGSNEQFF	4	4.59712e-05	TCRBV06-06	TCRBD02-01*01	TCRBJ02-01*01
GAGTTGGCTGCTCCCTCCCAGACATCTGTGTACTTCTGTGCCAGCAGTTACTCAGGAGACAACTCCTACGAGCAGTACTTCGGGCCG	CASSYSGDNSYEQYF	4	4.59712e-05	TCRBV06-06		TCRBJ02-07*01
ATCCGGTCCACAAAGCTGGAGGACTCAGCCATGTACTTCTGTGCCAGCAGCCTTGGCCGACAGGGCAATGAGCAGTTCTTCGGGCCA	CASSLGRQGNEQFF	4	4.59712e-05	TCRBV02-01*01	TCRBD01-01*01	TCRBJ02-01*01
ATCCGGTCCACAAAGCTGGAGGACTCAGCCATGTACTTCTGTGCCAGCAGTTCAGGGTATGCCAAAAACATTCAGTACTTCGGCGCC	CASSSGYAKNIQYF	4	4.59712e-05	TCRBV02-01*01	TCRBD01-01*01	TCRBJ02-04*01
CTGAAGATCCGGTCCACAAAGCTGGAGGACTCAGCCATGTACTTCTGTGCCAGCAGTGTTGTGGGGGAGACCCAGTACTTCGGGCCA	CASSVVGETQYF	4	4.59712e-05	TCRBV02-01*01		TCRBJ02-05*01
ATCCGGTCCACAAAGCTGGAGGACTCAGCCATGTACTTCTGTGCCAGCACCGAAGGACTCCCCCAAGATACGCAGTATTTTGGCCCA	CASTEGLPQDTQYF	4	4.59712e-05	TCRBV02-01*01	TCRBD02-01	TCRBJ02-03*01
ACAAAGCTGGAGGACTCAGCCATGTACTTCTGTGCCAGCAGTGTCTACGTTGGAGGACAGGGGAACTATGGCTACACCTTCGGTTCG	CASSVYVGGQGNYGYTF	4	4.59712e-05	TCRBV02-01*01	TCRBD01-01*01	TCRBJ01-02*01
AAGCTGGAGGACTCAGCCATGTACTTCTGTGCCAGCAGTGAAGCGGGACAGGGCATCCTCTCTGGAAACACCATATATTTTGGAGAG	CASSEAGQGILSGNTIYF	4	4.59712e-05	TCRBV02-01*01	TCRBD01-01*01	TCRBJ01-03*01
CTGAAGATCCGGTCCACAAAGCTGGAGGACTCAGCCATGTACTTCTGTGCCAGCATGAGGAGTGCAGAGACCCAGTACTTCGGGCCA	CASMRSAETQYF	4	4.59712e-05	TCRBV02-01*01	TCRBD02-01*02	TCRBJ02-05*01
ATCCGGTCCACAAAGCTGGAGGACTCAGCCATGTACTTCTGTGCCAGCAGTGACTTGCGGGATTCCCACGAGCAGTACTTCGGGCCG	CASSDLRDSHEQYF	4	4.59712e-05	TCRBV02-01*01	TCRBD02-01*02	TCRBJ02-07*01
CGGTCCACAAAGCTGGAGGACTCAGCCATGTACTTCTGTGCCAGCAGGGGCCTGACAGGAGGTAACACTGAAGCTTTCTTTGGACAA	CASRGLTGGNTEAFF	4	4.59712e-05	TCRBV02-01*01	TCRBD01-01*01	TCRBJ01-01*01
AAGATCCGGTCCACAAAGCTGGAGGACTCAGCCATGTACTTCTGTGCCATCCCGGGGCAGGGTAATACTGGCTACACCTTCGGTTCG	CAIPGQGNTGYTF	4	4.59712e-05	TCRBV02-01*01		TCRBJ01-02*01
CGGTCCACAAAGCTGGAGGACTCAGCCATGTACTTCTGTGCCAGCAGTGGTCAGCGGGGGGGCATGGAGACCCAGTACTTCGGGCCA	CASSGQRGGMETQYF	4	4.59712e-05	TCRBV02-01*01	TCRBD02-01*01	TCRBJ02-05*01
AAGCTGGAGGACTCAGCCATGTACTTCTGTGCCAGCAGGCCCCTAGCGGGGGGGCGCAGCTCCTACAATGAGCAGTTCTTCGGGCCA	CASRPLAGGRSSYNEQFF	4	4.59712e-05	TCRBV02-01*01	TCRBD02-01*01	TCRBJ02-01*01
AAGATCCGGTCCACAAAGCTGGAGGACTCAGCCATGTACTTCTGTGCCAGCACAACAGGGGGGGTGGGAGAGCAGTACTTCGGGCCG	CASTTGGVGEQYF	4	4.59712e-05	TCRBV02-01*01	TCRBD01-01*01	TCRBJ02-07*01
AAGATCCGGTCCACAAAGCTGGAGGACTCAGCCATGTACTTCTGTGCCAGCAGTGAAGCGGTCTACAATGAGCAGTTCTTCGGGCCA	CASSEAVYNEQFF	4	4.59712e-05	TCRBV02-01*01		TCRBJ02-01*01
ATCCGGTCCACAAAGCTGGAGGACTCAGCCATGTACTTCTGTGCCAGCAGTGACGGGCGGGGGAGGCGTGAGCAGTTCTTCGGGCCA	CASSDGRGRREQFF	4	4.59712e-05	TCRBV02-01*01	TCRBD02-01*01	TCRBJ02-01*01
CTGGAGGACTCAGCCATGTACTTCTGTGCCAGCAGTCCCCCCGGGGGCTGGGGATCTCTAGCCAAAAACATTCAGTACTTCGGCGCC	CASSPPGGWGSLAKNIQYF	4	4.59712e-05	TCRBV02-01*01		TCRBJ02-04*01
ACTCTGAAGATCCGGTCCACAAAGCTGGAGGACTCAGCCATGTACTTCTGTGCCAGCAGTGAATGGGGGGGTGCGAATTTTGGCCCA	CASSEWGGANF	4	4.59712e-05	TCRBV02-01*01	TCRBD02-01*01	TCRBJ02-03*01
AAGATCCGGTCCACAAAGCTGGAGGACTCAGCCATGTACTTCTGTGCCAGCCGCCAACAGGGGGCGCGGGGCTACACCTTCGGTTCG	CASRQQGARGYTF	4	4.59712e-05	TCRBV02-01*01	TCRBD01-01*01	TCRBJ01-02*01
TCCACAAAGCTGGAGGACTCAGCCATGTACTTCTGTGCCAGCAGTGAAGCGCAGGGGACTAGCACAGATACGCAGTATTTTGGCCCA	CASSEAQGTSTDTQYF	4	4.59712e-05	TCRBV02-01*01		TCRBJ02-03*01
CGGTCCACAAAGCTGGAGGACTCAGCCATGTACTTCTGTGCCAGCAGTGATTTCAGACAGGGGTCGTACGAGCAGTACTTCGGGCCG	CASSDFRQGSYEQYF	4	4.59712e-05	TCRBV02-01*01	TCRBD01-01*01	TCRBJ02-07*01
ATCCGGTCCACAAAGCTGGAGGACTCAGCCATGTACTTCTGTGCCGGCCAAGGGGGGGTCCCTAACTATGGCTACACCTTCGGTTCG	CAGQGGVPNYGYTF	4	4.59712e-05	TCRBV02-01*01	TCRBD02-01*01	TCRBJ01-02*01
ATCCGGTCCACAAAGCTGGAGGACTCAGCCATGTACTTCTGTGCCAGCAGTGTACGGATCCTGGGCACTGAAGCTTTCTTTGGACAA	CASSVRILGTEAFF	4	4.59712e-05	TCRBV02-01*01		TCRBJ01-01*01
AAGATCCGGTCCACAAAGCTGGAGGACTCAGCCATGTACTTCTGTGCCAGCAGTGGCTCAGGTCGCTATGGCTACACCTTCGGTTCG	CASSGSGRYGYTF	4	4.59712e-05	TCRBV02-01*01	TCRBD01-01*01	TCRBJ01-02*01
TCCACAAAGCTGGAGGACTCAGCCATGTACTTCTGTGCCAGCAGTGACGTTACAGGGGAGGGAAACTATGGCTACACCTTCGGTTCG	CASSDVTGEGNYGYTF	4	4.59712e-05	TCRBV02-01*01		TCRBJ01-02*01
GTGCAGCCTGCAGAACTGGAGGATTCTGGAGTTTATTTCTGTGCCAGCAGCCAAGTGGACAGCACTTATGGCTACACCTTCGGTTCG	CASSQVDSTYGYTF	4	4.59712e-05	TCRBV14-01*01	TCRBD01-01*01	TCRBJ01-02*01
CCTGCAGAACTGGAGGATTCTGGAGTTTATTTCTGTGCCAGCAGCCAAGACCCGGGACGGACTCTCTATGGCTACACCTTCGGTTCG	CASSQDPGRTLYGYTF	4	4.59712e-05	TCRBV14-01*01		TCRBJ01-02*01
CAGCCTGCAGAACTGGAGGATTCTGGAGTTTATTTCTGTGCCAGCAGCCGGGGGTCCACCCCTTCTGAAAAACTGTTTTTTGGCAGT	CASSRGSTPSEKLFF	4	4.59712e-05	TCRBV14-01*01		TCRBJ01-04*01
CCTGCAGAACTGGAGGATTCTGGAGTTTATTTCTGTGCCAGCAGCCAAGCATGGAAGAATGGGGCCAACGTCCTGACTTTCGGGGCC	CASSQAWKNGANVLTF	4	4.59712e-05	TCRBV14-01*01		TCRBJ02-06*01
GTGCAGCCTGCAGAACTGGAGGATTCTGGAGTTTATTTCTGTGCCAGCAGCTACCGACAGGGTTCCTACGAGCAGTACTTCGGGCCG	CASSYRQGSYEQYF	4	4.59712e-05	TCRBV14-01*01	TCRBD01-01*01	TCRBJ02-07*01
CTGAAGGTGCAGCCTGCAGAACTGGAGGATTCTGGAGTTTATTTCTGTGCCAGCAGTCCTTTGGTAGATACGCAGTATTTTGGCCCA	CASSPLVDTQYF	4	4.59712e-05	TCRBV14-01*01		TCRBJ02-03*01
AAGGTGCAGCCTGCAGAACTGGAGGATTCTGGAGTTTATTTCTGTGCCAGCAGCCCTTACCTTAACTCACCCCTCCACTTTGGGAAC	CASSPYLNSPLHF	4	4.59712e-05	TCRBV14-01*01		TCRBJ01-06*01
GTGAGCACCTTGGAGCTGGGGGACTCGGCCCTTTATCTTTGCGCCAGCAGCTCGGGGGACGGTGACACTGAAGCTTTCTTTGGACAA	CASSSGDGDTEAFF	4	4.59712e-05	TCRBV05-01*01	TCRBD02-01*01	TCRBJ01-01*01
ACCTTGGAGCTGGGGGACTCGGCCCTTTATCTTTGCGCCAGCAGCTCTTTAGCGGCGGACGCCTACAATGAGCAGTTCTTCGGGCCA	CASSSLAADAYNEQFF	4	4.59712e-05	TCRBV05-01*01	TCRBD02-01	TCRBJ02-01*01
ATGAATGTGAGCACCTTGGAGCTGGGGGACTCGGCCCTTTATCTTTGCGCCAGCAGCTTGACACTAAATACGCAGTATTTTGGCCCA	CASSLTLNTQYF	4	4.59712e-05	TCRBV05-01*01	TCRBD02-01	TCRBJ02-03*01
AGCACCTTGGAGCTGGGGGACTCGGCCCTTTATCTTTGCGCCAGCAGCTTGCTAGCGGACAGGAGGGATGAGCAGTTCTTCGGGCCA	CASSLLADRRDEQFF	4	4.59712e-05	TCRBV05-01*01		TCRBJ02-01*01
AGCACCTTGGAGCTGGGGGACTCGGCCCTTTATCTTTGCGCCAGCAGTCTCGGACAGGGGGCGTATCAGCCCCAGCATTTTGGTGAT	CASSLGQGAYQPQHF	4	4.59712e-05	TCRBV05-01*01	TCRBD01-01*01	TCRBJ01-05*01
AGCACCTTGGAGCTGGGGGACTCGGCCCTTTATCTTTGCGCCAGCAGACCCCGAGGGACGGGAAACACTGAAGCTTTCTTTGGACAA	CASRPRGTGNTEAFF	4	4.59712e-05	TCRBV05-01*01		TCRBJ01-01*01
ACGATCCAGCGCACACAGCAGGAGGACTCGGCCGTGTATCTCTGTGCCAGCAGCTTAGGACCCTCAACTGAAGCTTTCTTTGGACAA	CASSLGPSTEAFF	4	4.59712e-05	TCRBV07-02*01		TCRBJ01-01*01
ATCCAGCGCACACAGCAGGAGGACTCCGCCGTGTATCTCTGTGCCAGCAGCTTAGTAGGGCAGTACTATGGCTACACCTTCGGTTCG	CASSLVGQYYGYTF	4	4.59712e-05	TCRBV07-08*01		TCRBJ01-02*01
CAGCGCACACAGCAGGAGGACTCCGCCGTGTATCTCTGTGCCAGCAGCTTAGAGGGGGCCGTGGGCACTGAAGCTTTCTTTGGACAA	CASSLEGAVGTEAFF	4	4.59712e-05	TCRBV07-08*01	TCRBD01-01*01	TCRBJ01-01*01
AAGATCCAGCGCACACAGCAGGAGGACTCCGCCGTGTATCTCTGTGCCAGCAGCTTAGTGGACACCGGGGAGCTGTTTTTTGGAGAA	CASSLVDTGELFF	4	4.59712e-05	TCRBV07-08*01		TCRBJ02-02*01
CAGCGCACACAGCAGGAGGACTCCGCCGTGTATCTCTGTGCCAGCAGCGCCTGGACAGGGGGCATGAACGAGCAGTACTTCGGGCCG	CASSAWTGGMNEQYF	4	4.59712e-05	TCRBV07-08*01	TCRBD01-01*01	TCRBJ02-07*01
CTGAAGATCCAGCGCACACAGCAGGAGGACTCCGCCGTGTATCTCTGTGCCAGCAGCTTACCCCCGTCCGAGCAGTACTTCGGGCCG	CASSLPPSEQYF	4	4.59712e-05	TCRBV07-08*01	TCRBD02-01	TCRBJ02-07*01
CAGCGCACACAGCAGGAGGACTCCGCCGTGTATCTCTGTGCCAGCAGCTTAGCCGGGGGGGGCCAAGAGACCCAGTACTTCGGGCCA	CASSLAGGGQETQYF	4	4.59712e-05	TCRBV07-08*01	TCRBD02-01*01	TCRBJ02-05*01
AAGATCCAGCGCACACAGCAGGAGGACTCCGCCGTGTATCTCTGTGCCAGCAGCTTAGAACAGGGATCTGTTGCTTTCTTTGGACAA	CASSLEQGSVAFF	4	4.59712e-05	TCRBV07-08*01	TCRBD01-01*01	TCRBJ01-01*01
CTGAAGATCCAGCGCACACAGCAGGAGGACTCCGCCGTGTATCTCTGTGCCGTGGGACAGGGGGCAAATACGCAGTATTTTGGCCCA	CAVGQGANTQYF	4	4.59712e-05	TCRBV07-08*01	TCRBD01-01*01	TCRBJ02-03*01
ATCCAGCGCACACAGCAGGAGGACTCCGCCGTGTATCTCTGTGCCAGCAGCGAGAGGCCGGAGAACACTGAAGCTTTCTTTGGACAA	CASSERPENTEAFF	4	4.59712e-05	TCRBV07-08*01	TCRBD02-01*02	TCRBJ01-01*01
CTGAGGATCCAGCAGGTAGTGCGAGGAGATTCGGCAGCTTATTTCTGTGCCAGCTCCAAGACTAACACTGAAGCTTTCTTTGGACAA	CASSKTNTEAFF	4	4.59712e-05	TCRBV18-01*01	TCRBD02-01	TCRBJ01-01*01
ATCCAGCAGGTAGTGCGAGGAGATTCGGCAGCTTATTTCTGTGCCAGCTCCTCCGGGACGAACAACTATGGCTACACCTTCGGTTCG	CASSSGTNNYGYTF	4	4.59712e-05	TCRBV18-01*01		TCRBJ01-02*01
CTGAGGATCCAGCAGGTAGTGCGAGGAGATTCGGCAGCTTATTTCTGTGCCAGCTCACCTAGCACAGATACGCAGTATTTTGGCCCA	CASSPSTDTQYF	4	4.59712e-05	TCRBV18-01*01		TCRBJ02-03*01
AGGATCCAGCAGGTAGTGCGAGGAGATTCGGCAGCTTATTTCTGTGCCAGCTCAGGAGACAGCAATCAGCCCCAGCATTTTGGTGAT	CASSGDSNQPQHF	4	4.59712e-05	TCRBV18-01*01	TCRBD02-01*02	TCRBJ01-05*01
CTGAGGATCCAGCAGGTAGTGCGAGGAGATTCGGCAGCTTATTTCTGTGCCAGCTCACCACTCATTACTGAAGCTTTCTTTGGACAA	CASSPLITEAFF	4	4.59712e-05	TCRBV18-01*01	TCRBD01-01*01	TCRBJ01-01*01
CAGGTAGTGCGAGGAGATTCGGCAGCTTATTTCTGTGCCAGCTCACCAGTAGGGGCACGGGCTAATGAAAAACTGTTTTTTGGCAGT	CASSPVGARANEKLFF	4	4.59712e-05	TCRBV18-01*01	TCRBD01-01*01	TCRBJ01-04*01
CAGGTAGTGCGAGGAGATTCGGCAGCTTATTTCTGTGCCAGCTCACCACCGGGTGACCATAGCACAGATACGCAGTATTTTGGCCCA	CASSPPGDHSTDTQYF	4	4.59712e-05	TCRBV18-01*01		TCRBJ02-03*01
CTGAGGATCCAGCAGGTAGTGCGAGGAGATTCGGCAGCTTATTTCTGTGCCAGCTCACCCGTAAACACTGAAGCTTTCTTTGGACAA	CASSPVNTEAFF	4	4.59712e-05	TCRBV18-01*01	TCRBD02-01	TCRBJ01-01*01
CTGCTGTCGGCTGCTCCCTCCCAGACATCTGTGTACTTCTGTGCCAGCAGTACCCTCGACAGGATCTATGGCTACACCTTCGGTTCG	CASSTLDRIYGYTF	4	4.59712e-05	TCRBV06-05*01	TCRBD01-01*01	TCRBJ01-02*01
CTGTCGGCTGCTCCCTCCCAGACATCTGTGTACTTCTGTGCCAGCAGTTTGGGACAGGGGAGGAACTATGGCTACACCTTCGGTTCG	CASSLGQGRNYGYTF	4	4.59712e-05	TCRBV06-05*01	TCRBD01-01*01	TCRBJ01-02*01
CTCAGGCTGCTGTCGGCTGCTCCCTCCCAGACATCTGTGTACTTCTGTGCCAGCAGCACAGGGGTCTCACCCCTCCACTTTGGGAAC	CASSTGVSPLHF	4	4.59712e-05	TCRBV06-05*01	TCRBD01-01*01	TCRBJ01-06*01
CTGTCGGCTGCTCCCTCCCAGACATCTGTGTACTTCTGTGCCAGCAGTTACTCCTTACAGGGCGGGGGGGAGCTGTTTTTTGGAGAA	CASSYSLQGGGELFF	4	4.59712e-05	TCRBV06-05*01	TCRBD01-01*01	TCRBJ02-02*01
CTGTCGGCTGCTCCCTCCCAGACATCTGTGTACTTCTGTGCCAGCAGTTACTCTGCGTCGTTAAGCGGTGGCTACACCTTCGGTTCG	CASSYSASLSGGYTF	4	4.59712e-05	TCRBV06-05*01	TCRBD02-01	TCRBJ01-02*01
CTGTCGGCTGCTCCCTCCCAGACATCTGTGTACTTCTGTGCCAGCAGCCCGACAGGCATAAAGAACACTGAAGCTTTCTTTGGACAA	CASSPTGIKNTEAFF	4	4.59712e-05	TCRBV06-05*01	TCRBD01-01*01	TCRBJ01-01*01
AGGCTGCTGTCGGCTGCTCCCTCCCAGACATCTGTGTACTTCTGTGCCAGCAGCCAACCGGGAACCCCCGGCTACACCTTCGGTTCG	CASSQPGTPGYTF	4	4.59712e-05	TCRBV06-05*01	TCRBD02-01*02	TCRBJ01-02*01
TTGGAGATCCAGCGCACAGAGCAGGGGGACTCGGCCATGTATCTCTGTGCCAGCAGCTCTGAAGTCGGCGAGCAGTACTTCGGGCCG	CASSSEVGEQYF	4	4.59712e-05	TCRBV07-09	TCRBD02-01	TCRBJ02-07*01
ATCCAGCGCACAGAGCAGGGGGACTCGGCCATGTATCTCTGTGCCAGCAGCGCCGGTAGCGGGGGGGCGATTCAGTACTTCGGCGCC	CASSAGSGGAIQYF	4	4.59712e-05	TCRBV07-09	TCRBD02-01*01	TCRBJ02-04*01
CGGTCCACAAAGCTGGAGGACTCAGCCATGTACTTCTGTGCCAGCAGTGAACTGGAGGGGGCGCAAACTGAAGCTTTCTTTGGACAA	CASSELEGAQTEAFF	4	4.59712e-05	TCRBV02-01*01	TCRBD01-01*01	TCRBJ01-01*01
AAGATCCGGTCCACAAAGCTGGAGGACTCAGCCATGTACTTCTGTGCCAGCAGTGAACCTTTCAGGGACGAGCAGTACTTCGGGCCG	CASSEPFRDEQYF	4	4.59712e-05	TCRBV02-01*01	TCRBD01-01*01	TCRBJ02-07*01
CGGTCCACAAAGCTGGAGGACTCAGCCATGTACTTCTGTGCCAGCAGTGAAGGTCGGGGAACCTATCAGCCCCAGCATTTTGGTGAT	CASSEGRGTYQPQHF	4	4.59712e-05	TCRBV02-01*01	TCRBD02-01*01	TCRBJ01-05*01
CGGTCCACAAAGCTGGAGGACTCAGCCATGTACTTCTGTGCCAGCAAAGCGGACCGTTATAGCAATCAGCCCCAGCATTTTGGTGAT	CASKADRYSNQPQHF	4	4.59712e-05	TCRBV02-01*01	TCRBD02-01	TCRBJ01-05*01
ACTCTGAAGATCCGGTCCACAAAGCTGGAGGACTCAGCCATGTACTTCTGTGCCAGCTCCCCGGTGAAGGGCTACACCTTCGGTTCG	CASSPVKGYTF	4	4.59712e-05	TCRBV02-01*01	TCRBD02-01	TCRBJ01-02*01
ACGTTGGCGTCTGCTGTACCCTCTCAGACATCTGTGTACTTCTGTGCCAGCAGTGTAAACATCGAAGGTGAAGCTTTCTTTGGACAA	CASSVNIEGEAFF	4	4.59712e-05	TCRBV06-04		TCRBJ01-01*01
TTGGCGTCTGCTGTACCCTCTCAGACATCTGTGTACTTCTGTGCCAGCAGTGACTCGGGGGTATCAGATACGCAGTATTTTGGCCCA	CASSDSGVSDTQYF	4	4.59712e-05	TCRBV06-04		TCRBJ02-03*01
GCGTCTGCTGTACCCTCTCAGACATCTGTGTACTTCTGTGCCAGCAGTGAGGGGCAGGGGGAATGGAGTGGCTACACCTTCGGTTCG	CASSEGQGEWSGYTF	4	4.59712e-05	TCRBV06-04	TCRBD01-01*01	TCRBJ01-02*01
GCTGTACCCTCTCAGACATCTGTGTACTTCTGTGCCAGCAGTAGTGGCGGGGGGATGATCCCCTACAATGAGCAGTTCTTCGGGCCA	CASSSGGGMIPYNEQFF	4	4.59712e-05	TCRBV06-04	TCRBD02-01*01	TCRBJ02-01*01
TTGGCGTCTGCTGTACCCTCTCAGACATCTGTGTACTTCTGTGCCAGCAGTGACTCCACAGGGGGGGGACGCTACACCTTCGGTTCG	CASSDSTGGGRYTF	4	4.59712e-05	TCRBV06-04	TCRBD01-01*01	TCRBJ01-02*01
CCCCTCACGTTGGCGTCTGCTGTACCCTCTCAGACATCTGTGTACTTCTGTGCCAGCAGTGAAGCGGGCGGAGCTTTCTTTGGACAA	CASSEAGGAFF	4	4.59712e-05	TCRBV06-04	TCRBD02-01	TCRBJ01-01*01
ACGTTGGCGTCTGCTGTACCCTCTCAGACATCTGTGTACTTCTGTGCCAGCAGTCGACTTATGAACACTGAAGCTTTCTTTGGACAA	CASSRLMNTEAFF	4	4.59712e-05	TCRBV06-04	TCRBD02-01	TCRBJ01-01*01
GCGTCTGCTGTACCCTCTCAGACATCTGTGTACTTCTGTGCCAGCAGTGACTTGGCTAGCGGGGGGGCTGAGCAGTTCTTCGGGCCA	CASSDLASGGAEQFF	4	4.59712e-05	TCRBV06-04	TCRBD02-01*01	TCRBJ02-01*01
TCTGCTGTACCCTCTCAGACATCTGTGTACTTCTGTGCCAGCAGTGACGGAAACGGGGGGGCAACAGATACGCAGTATTTTGGCCCA	CASSDGNGGATDTQYF	4	4.59712e-05	TCRBV06-04	TCRBD02-01*01	TCRBJ02-03*01
GTGAGCACCTTGGAGCTGGGGGACTCGGCCCTTTATCTTTGCGCCAGCACTTCCGGGGGGTACCAAGAGACCCAGTACTTCGGGCCA	CASTSGGYQETQYF	4	4.59712e-05	TCRBV05-01*01	TCRBD02-01*01	TCRBJ02-05*01
GTGAGCACCTTGGAGCTGGGGGACTCGGCCCTTTATCTTTGCGCCAGCAATCCTCGGACAGGGGAGAATGAGCAGTTCTTCGGGCCA	CASNPRTGENEQFF	4	4.59712e-05	TCRBV05-01*01	TCRBD01-01*01	TCRBJ02-01*01
AATGTGAGCACCTTGGAGCTGGGGGACTCGGCCCTTTATCTTTGCGCCAGCAGCAACCCCAGCCAAGAGACCCAGTACTTCGGGCCA	CASSNPSQETQYF	4	4.59712e-05	TCRBV05-01*01	TCRBD01-01*01	TCRBJ02-05*01
AGCACCTTGGAGCTGGGGGACTCGGCCCTTTATCTTTGCGCCAGCAGCGTTTCAGGGTACTCCCAAGAGACCCAGTACTTCGGGCCA	CASSVSGYSQETQYF	4	4.59712e-05	TCRBV05-01*01	TCRBD01-01*01	TCRBJ02-05*01
ACCTTGGAGCTGGGGGACTCGGCCCTTTATCTTTGCGCCAGCAGCTTACAAACTCCCGCGGGTAGCTATGGCTACACCTTCGGTTCG	CASSLQTPAGSYGYTF	4	4.59712e-05	TCRBV05-01*01	TCRBD02-01	TCRBJ01-02*01
TTGGAGCTGGGGGACTCGGCCCTTTATCTTTGCGCCAGCAGCTGGGGACAGCCACAAAGCCTATCCTACGAGCAGTACTTCGGGCCG	CASSWGQPQSLSYEQYF	4	4.59712e-05	TCRBV05-01*01	TCRBD01-01*01	TCRBJ02-07*01
ACCTTGGAGCTGGGGGACTCGGCCCTTTATCTTTGCGCCAGCAGCTTGGGTCCGGGGGCGAACACCGGGGAGCTGTTTTTTGGAGAA	CASSLGPGANTGELFF	4	4.59712e-05	TCRBV05-01*01	TCRBD02-01*01	TCRBJ02-02*01
AGCACCTTGGAGCTGGGGGACTCGGCCCTTTATCTTTGCGCCAGCAGCCTACGGACAGGGGGTAATGAAAAACTGTTTTTTGGCAGT	CASSLRTGGNEKLFF	4	4.59712e-05	TCRBV05-01*01	TCRBD01-01*01	TCRBJ01-04*01
AGCACCTTGGAGCTGGGGGACTCGGCCCTTTATCTTTGCGCCAGCAGCTTAACTTCGGCGATCACAGATACGCAGTATTTTGGCCCA	CASSLTSAITDTQYF	4	4.59712e-05	TCRBV05-01*01		TCRBJ02-03*01
GCACTGCAGCAAGAAGACTCAGCTGCGTATCTCTGCACCAGCAGCCCATCCACCGCCGGGGTATACAATGAGCAGTTCTTCGGGCCA	CTSSPSTAGVYNEQFF	4	4.59712e-05	TCRBV01-01*01	TCRBD02-01*01	TCRBJ02-01*01
AAGATCCAGCGCACACAGCAGGAGGACTCCGCCGTGTATCTCTGTGCCAGCAGTCCAAGCAGGGTTGAGACCCAGTACTTCGGGCCA	CASSPSRVETQYF	4	4.59712e-05	TCRBV07-08*01	TCRBD01-01*01	TCRBJ02-05*01
CAGCAGGAGGACTCCGCCGTGTATCTCTGTGCCAGCAGCCCGAGCGGCGGACAGGCTTCATCGATCTATGGCTACACCTTCGGTTCG	CASSPSGGQASSIYGYTF	4	4.59712e-05	TCRBV07-08*01	TCRBD01-01*01	TCRBJ01-02*01
CAGCGCACACAGCAGGAGGACTCCGCCGTGTATCTCTGTGCCAGCAGCTTAATGGCTAGCGTCACAGATACGCAGTATTTTGGCCCA	CASSLMASVTDTQYF	4	4.59712e-05	TCRBV07-08*01	TCRBD02-01	TCRBJ02-03*01
ATCCAGCGCACACAGCAGGAGGACTCCGCCGTGTATCTCTGTGCCAGCAGCTTACTACAGGGACCCTACGAGCAGTACTTCGGGCCG	CASSLLQGPYEQYF	4	4.59712e-05	TCRBV07-08*01	TCRBD01-01*01	TCRBJ02-07*01
AAGATCCAGCGCACACAGCAGGAGGACTCCGCCGTGTATCTCTGTGCCAGCAGCCTGGGACTAGCGGAGACCCAGTACTTCGGGCCA	CASSLGLAETQYF	4	4.59712e-05	TCRBV07-08*01	TCRBD02-01	TCRBJ02-05*01
GAGTCAGCTACCCGCTCCCAGACATCTGTGTATTTCTGCGCCACCAACCCCAGGGTTCGGCGCGGAAATGAGCAGTTCTTCGGGCCA	CATNPRVRRGNEQFF	4	4.59712e-05	TCRBV10-02*01	TCRBD01-01*01	TCRBJ02-01*01
GCTACCCGCTCCCAGACATCTGTGTATTTCTGCGCCAGCAGTGAGTCGAGGCTGGCGGGGGGGCTGGAGACCCAGTACTTCGGGCCA	CASSESRLAGGLETQYF	4	4.59712e-05	TCRBV10-02*01	TCRBD02-01*01	TCRBJ02-05*01
GAGTCAGCTACCCGCTCCCAGACATCTGTGTATTTCTGCGCCAGCAGTGAGCTAGCGGGGGGCTACAATGAGCAGTTCTTCGGGCCA	CASSELAGGYNEQFF	4	4.59712e-05	TCRBV10-02*01	TCRBD02-01*01	TCRBJ02-01*01
GCTACCCGCTCCCAGACATCTGTGTATTTCTGCGCCAGCAGTGGGCCTATGACAGGGTGGTACACAGATACGCAGTATTTTGGCCCA	CASSGPMTGWYTDTQYF	4	4.59712e-05	TCRBV10-02*01	TCRBD01-01*01	TCRBJ02-03*01
GAGTCAGCTACCCGCTCCCAGACATCTGTGTATTTCTGCGCCAGCAGTGAGTTTGAACAGGGGGCTGAAGGCTACACCTTCGGTTCG	CASSEFEQGAEGYTF	4	4.59712e-05	TCRBV10-02*01	TCRBD01-01*01	TCRBJ01-02*01
TCAGCTACCCGCTCCCAGACATCTGTGTATTTCTGCGCCAGCAGTGAGTCGAATCAAGGGTACGGCGGGGAGCTGTTTTTTGGAGAA	CASSESNQGYGGELFF	4	4.59712e-05	TCRBV10-02*01		TCRBJ02-02*01
GTGCGAGGAGATTCGGCAGCTTATTTCTGTGCCAGCTCACCTCCGGGTGATACAACTCGATCTAATGAAAAACTGTTTTTTGGCAGT	CASSPPGDTTRSNEKLFF	4	4.59712e-05	TCRBV18-01*01	TCRBD02-01	TCRBJ01-04*01
CAGCAGGTAGTGCGAGGAGATTCGGCAGCTTATTTCTGTGCCAGCTCCAGAATTACGGGGGTTCAAGAGACCCAGTACTTCGGGCCA	CASSRITGVQETQYF	4	4.59712e-05	TCRBV18-01*01	TCRBD02-01*01	TCRBJ02-05*01
ATCCAGCAGGTAGTGCGAGGAGATTCGGCAGCTTATTTCTGTGCCAGCTCACCACGTTCCCAAAACACTGAAGCTTTCTTTGGACAA	CASSPRSQNTEAFF	4	4.59712e-05	TCRBV18-01*01	TCRBD01-01*01	TCRBJ01-01*01
ATCCAGCAGGTAGTGCGAGGAGATTCGGCAGCTTATTTCTGTGCCAGCTCACCACCGTACCCCCAAGAGACCCAGTACTTCGGGCCA	CASSPPYPQETQYF	4	4.59712e-05	TCRBV18-01*01		TCRBJ02-05*01
CAGCAGGTAGTGCGAGGAGATTCGGCAGCTTATTTCTGTGCCAGCTCACCAAGTACAGCATATAATTCACCCCTCCACTTTGGGAAC	CASSPSTAYNSPLHF	4	4.59712e-05	TCRBV18-01*01	TCRBD01-01*01	TCRBJ01-06*01
CAGCAGGTAGTGCGAGGAGATTCGGCAGCTTATTTCTGTGCCAGCTCGTCGGGACAACAGGCTGGAAACACCATATATTTTGGAGAG	CASSSGQQAGNTIYF	4	4.59712e-05	TCRBV18-01*01	TCRBD01-01*01	TCRBJ01-03*01
CTCAGGCTGCTGTCGGCTGCTCCCTCCCAGACATCTGTGTACTTCTGTGCCAGCAGCCGTTCGGGCGATGGCTACACCTTCGGTTCG	CASSRSGDGYTF	4	4.59712e-05	TCRBV06-05*01		TCRBJ01-02*01
AGGCTGCTGTCGGCTGCTCCCTCCCAGACATCTGTGTACTTCTGTGCCAGCAGTGTGGTACAGGGGCCCGAGCAGTACTTCGGGCCG	CASSVVQGPEQYF	4	4.59712e-05	TCRBV06-05*01	TCRBD01-01*01	TCRBJ02-07*01
CTCAGGCTGCTGTCGGCTGCTCCCTCCCAGACATCTGTGTACTTCTGTGCCAGCAGTTATGATCGGAATGAGCAGTTCTTCGGGCCA	CASSYDRNEQFF	4	4.59712e-05	TCRBV06-05*01	TCRBD02-01	TCRBJ02-01*01
CTGTCGGCTGCTCCCTCCCAGACATCTGTGTACTTCTGTGCCAGCAGTCGACAGGGGACGGCCAAAAACATTCAGTACTTCGGCGCC	CASSRQGTAKNIQYF	4	4.59712e-05	TCRBV06-05*01	TCRBD01-01*01	TCRBJ02-04*01
CTGTCGGCTGCTCCCTCCCAGACATCTGTGTACTTCTGTGCCACCATTCGGGCACAGGGGTCCACAGATACGCAGTATTTTGGCCCA	CATIRAQGSTDTQYF	4	4.59712e-05	TCRBV06-05*01	TCRBD01-01*01	TCRBJ02-03*01
AGGCTGCTGTCGGCTGCTCCCTCCCAGACATCTGTGTACTTCTGTGCCAGCAGCCCGACGGCTGGAAACACCATATATTTTGGAGAG	CASSPTAGNTIYF	4	4.59712e-05	TCRBV06-05*01		TCRBJ01-03*01
CTGTCGGCTGCTCCCTCCCAGACATCTGTGTACTTCTGTGCCAGCAACAAACAGAGACAGGGGCAGGCTGAAGCTTTCTTTGGACAA	CASNKQRQGQAEAFF	4	4.59712e-05	TCRBV06-05*01	TCRBD01-01*01	TCRBJ01-01*01
AGGCTGCTGTCGGCTGCTCCCTCCCAGACATCTGTGTACTTCTGTGCCAGCAGTTCGCCCAGGGGGGAGACCCAGTACTTCGGGCCA	CASSSPRGETQYF	4	4.59712e-05	TCRBV06-05*01	TCRBD01-01*01	TCRBJ02-05*01
CTGTCGGCTGCTCCCTCCCAGACATCTGTGTACTTCTGTGCCAGCAGCCCCCTGGAGGCCCGAAATGAAAAACTGTTTTTTGGCAGT	CASSPLEARNEKLFF	4	4.59712e-05	TCRBV06-05*01	TCRBD02-01*02	TCRBJ01-04*01
CTCAGGCTGCTGTCGGCTGCTCCCTCCCAGACATCTGTGTACTTCTGTGCCAGCAGTTACGAGGGAGAGGAACTGTTTTTTGGCAGT	CASSYEGEELFF	4	4.59712e-05	TCRBV06-05*01	TCRBD02-01*02	TCRBJ01-04*01
CTGTCGGCTGCTCCCTCCCAGACATCTGTGTACTTCTGTGCCAGCACCTCCGGAGACAGGGGGCTGCGTGGCTACACCTTCGGTTCG	CASTSGDRGLRGYTF	4	4.59712e-05	TCRBV06-05*01	TCRBD01-01*01	TCRBJ01-02*01
ACTCTGACAGTGACCAGTGCCCATCCTGAAGACAGCAGCTTCTACATCTGCAGTGCTTACAGAAACACTGAAGCTTTCTTTGGACAA	CSAYRNTEAFF	4	4.59712e-05	TCRBV20-01*01	TCRBD01-01*01	TCRBJ01-01*01
ACTCTGACAGTGACCAGTGCCCATCCTGAAGACAGCAGCTTCTACATCTGCAGTGCTAGTCGAGGCACTGAAGCTTTCTTTGGACAA	CSASRGTEAFF	4	4.59712e-05	TCRBV20-01*01	TCRBD02-01*02	TCRBJ01-01*01
ACTCTGACAGTGACCAGTGCCCATCCTGAAGACAGCAGCTTCTACATCTGCAGTGCTAGTAAGGTCTACGAGCAGTACTTCGGGCCG	CSASKVYEQYF	4	4.59712e-05	TCRBV20-01*01		TCRBJ02-07*01
CAGCGCACAGAGCAGGGGGACTCGGCCATGTATCTCTGTGCCAGCAGCCGAAGCGGGGCTTCCTACAATGAGCAGTTCTTCGGGCCA	CASSRSGASYNEQFF	4	4.59712e-05	TCRBV07-09	TCRBD02-01*01	TCRBJ02-01*01
ACCTTGGAGATCCAGCGCACAGAGCAGGGGGACTCGGCCATGTATCTCTGTGCCAGCAGCCAGAGCTACGAGCAGTACTTCGGGCCG	CASSQSYEQYF	4	4.59712e-05	TCRBV07-09		TCRBJ02-07*01
ACCTTGGAGATCCAGCGCACAGAGCAGGGGGACTCGGCCATGTATCTCTGTGCCAGCAGGGGGGAAAACGAGCAGTACTTCGGGCCG	CASRGENEQYF	4	4.59712e-05	TCRBV07-09		TCRBJ02-07*01
ATCCAGCGCACAGAGCAGGGGGACTCGGCCATGTATCTCTGTGCCAGCAGCTTTGGGACAGAAGGAAACACCATATATTTTGGAGAG	CASSFGTEGNTIYF	4	4.59712e-05	TCRBV07-09	TCRBD01-01*01	TCRBJ01-03*01
GAGCAGGGGGACTCGGCCATGTATCTCTGTGCCAGCAGCCCAACCGGGGGACAGGGGAAGGGAAGCTATGGCTACACCTTCGGTTCG	CASSPTGGQGKGSYGYTF	4	4.59712e-05	TCRBV07-09	TCRBD01-01*01	TCRBJ01-02*01
ATCCAGCGCACAGAGCAGGGGGACTCGGCCATGTATCTCTGTGCCAGCAGCTCAGGGGGTGGTTCTGAAAAACTGTTTTTTGGCAGT	CASSSGGGSEKLFF	4	4.59712e-05	TCRBV07-09	TCRBD01-01*01	TCRBJ01-04*01
GAGATCCAGCGCACAGAGCAGGGGGACTCGGCCATGTATCTCTGTGCCAGCAGCTTAGCCGGGCAAGAGACCCAGTACTTCGGGCCA	CASSLAGQETQYF	4	4.59712e-05	TCRBV07-09	TCRBD02-01	TCRBJ02-05*01
ATCCAGCGCACAGAGCAGGGGGACTCGGCCATGTATCTCTGTGCCAGCAGGAGAGCGGGACCCAACAATGAGCAGTTCTTCGGGCCA	CASRRAGPNNEQFF	4	4.59712e-05	TCRBV07-09	TCRBD02-01*02	TCRBJ02-01*01
GAGATCCAGCGCACAGAGCAGGGGGACTCGGCCATGTATCTCTGTGCCAGCAGCGATAGGACAGCCTACGAGCAGTACTTCGGGCCG	CASSDRTAYEQYF	4	4.59712e-05	TCRBV07-09	TCRBD01-01*01	TCRBJ02-07*01
GAGATCCAGCGCACAGAGCAGGGGGACTCGGCCATGTATCTCTGTGCCAGCAGCCTTACAGGGTGGGAGACCCAGTACTTCGGGCCA	CASSLTGWETQYF	4	4.59712e-05	TCRBV07-09	TCRBD01-01*01	TCRBJ02-05*01
CGCACAGAGCAGGGGGACTCGGCCATGTATCTCTGTGCCAGCAGCTCACGGGCGAGACTAGCGGGTGAGACCCAGTACTTCGGGCCA	CASSSRARLAGETQYF	4	4.59712e-05	TCRBV07-09	TCRBD02-01	TCRBJ02-05*01
ACAGAGCAGGGGGACTCGGCCATGTATCTCTGTGCCAGCAGCTCACCTAAGAGGCAGGGAAGCACAGATACGCAGTATTTTGGCCCA	CASSSPKRQGSTDTQYF	4	4.59712e-05	TCRBV07-09	TCRBD01-01*01	TCRBJ02-03*01
ATCCAGCGCACAGAGCAGGGGGACTCGGCCATGTATCTCTGTGCCAGCAGCTTATCCTCAGACGGCTATGGCTACACCTTCGGTTCG	CASSLSSDGYGYTF	4	4.59712e-05	TCRBV07-09		TCRBJ01-02*01
CAGCGCACAGAGCAGGGGGACTCGGCCATGTATCTCTGTGCCAGCAGCTTAGGAGGCAGGGCGGGCGAAAAACTGTTTTTTGGCAGT	CASSLGGRAGEKLFF	4	4.59712e-05	TCRBV07-09		TCRBJ01-04*01
CAGCGCACAGAGCAGGGGGACTCGGCCATGTATCTCTGTGCCAGCAGCTTAGCAGGACTAGCTGGGGGCGAGCAGTACTTCGGGCCG	CASSLAGLAGGEQYF	4	4.59712e-05	TCRBV07-09	TCRBD02-01	TCRBJ02-07*01
CAGCGCACAGAGCAGCGGGACTCAGCCATGTATCGCTGTGCCAGCAGCCCGGGACTAGCGGGGTCAGATACGCAGTATTTTGGCCCA	CASSPGLAGSDTQYF	4	4.59712e-05	TCRBV07-07*01	TCRBD02-01*01	TCRBJ02-03*01
ACGATTCAGCGCACAGAGCAGCGGGACTCAGCCATGTATCGCTGTGCCATTTCTTGGGGGCAGGGAGAGACCCAGTACTTCGGGCCA	CAISWGQGETQYF	4	4.59712e-05	TCRBV07-07*01	TCRBD01-01*01	TCRBJ02-05*01
AATGTGAGCACCTTGGAGCTGGGGGACTCGGCCCTTTATCTTTGCGCCAGCAGCTCGCCACCAGCGGACGAGCAGTACTTCGGGCCG	CASSSPPADEQYF	4	4.59712e-05	TCRBV05-01*01	TCRBD02-01	TCRBJ02-07*01
AGCACCTTGGAGCTGGGGGACTCGGCCCTTTATCTTTGCGCCAGCACCTTACTAGCGGGGGACCTTAATGAGCAGTTCTTCGGGCCA	CASTLLAGDLNEQFF	4	4.59712e-05	TCRBV05-01*01	TCRBD02-01*01	TCRBJ02-01*01
AGCACCTTGGAGCTGGGGGACTCGGCCCTTTATCTTTGCGCCAGCAGCAAAAGCGAGGGATGGAACACTGAAGCTTTCTTTGGACAA	CASSKSEGWNTEAFF	4	4.59712e-05	TCRBV05-01*01	TCRBD02-01*02	TCRBJ01-01*01
ACCTTGGAGCTGGGGGACTCGGCCCTTTATCTTTGCGCCAGCAGCTTGGGATCCAGTATCAGAAACACTGAAGCTTTCTTTGGACAA	CASSLGSSIRNTEAFF	4	4.59712e-05	TCRBV05-01*01	TCRBD01-01*01	TCRBJ01-01*01
GTGAGCACCTTGGAGCTGGGGGACTCGGCCCTTTATCTTTGCGCCAGCAGCTTGGTAGTTTCCCCCTACGAGCAGTACTTCGGGCCG	CASSLVVSPYEQYF	4	4.59712e-05	TCRBV05-01*01	TCRBD02-01	TCRBJ02-07*01
ACCTTGGAGCTGGGGGACTCGGCCCTTTATCTTTGCGCCAGCAGCCACCCCAAGGAGGGGTACACCGGGGAGCTGTTTTTTGGAGAA	CASSHPKEGYTGELFF	4	4.59712e-05	TCRBV05-01*01	TCRBD02-01*02	TCRBJ02-02*01
GTGAGCACCTTGGAGCTGGGGGACTCGGCCCTTTATCTTTGCGCCAGCAGCTTAGCAGGGCCCCAAGAGACCCAGTACTTCGGGCCA	CASSLAGPQETQYF	4	4.59712e-05	TCRBV05-01*01	TCRBD01-01*01	TCRBJ02-05*01
AGCACCTTGGAGCTGGGGGACTCGGCCCTTTATCTTTGCGCCACCTCGAGCGGGACAGGAATGAACACTGAAGCTTTCTTTGGACAA	CATSSGTGMNTEAFF	4	4.59712e-05	TCRBV05-01*01	TCRBD01-01*01	TCRBJ01-01*01
AGCACCTTGGAGCTGGGGGACTCGGCCCTTTATCTTTGCGCCAGCAGCGAAATGACAGGGGGTAATCAGCCCCAGCATTTTGGTGAT	CASSEMTGGNQPQHF	4	4.59712e-05	TCRBV05-01*01	TCRBD01-01*01	TCRBJ01-05*01
AGCACCTTGGAGCTGGGGGACTCGGCCCTTTATCTTTGCGCCAGCAGCTTCTACCCACAGGGCGAGGACGAGCAGTACTTCGGGCCG	CASSFYPQGEDEQYF	4	4.59712e-05	TCRBV05-01*01	TCRBD01-01*01	TCRBJ02-07*01
AGCACCTTGGAGCTGGGGGACTCGGCCCTTTATCTTTGCGCCAGCACCCCCGGCGAAAGGGTAGGATACGAGCAGTACTTCGGGCCG	CASTPGERVGYEQYF	4	4.59712e-05	TCRBV05-01*01		TCRBJ02-07*01
TCCGCCAGCACCAACCAGACATCTATGTACCTCTGTGCCAGCAGTTCCCGTCCGGCAGTACTCTCCTACGAGCAGTACTTCGGGCCG	CASSSRPAVLSYEQYF	4	4.59712e-05	TCRBV28-01*01		TCRBJ02-07*01
ATTCTGGAGTCCGCCAGCACCAACCAGACATCTATGTACCTCTGTGCCAGCAGGGAAGGGGCCGGTCAGCCCCAGCATTTTGGTGAT	CASREGAGQPQHF	4	4.59712e-05	TCRBV28-01*01	TCRBD01-01*01	TCRBJ01-05*01
ATTCTGGAGTCCGCCAGCACCAACCAGACATCTATGTACCTCTGTGCCAGCAGGACCGGACAGGGCGGAAAACTGTTTTTTGGCAGT	CASRTGQGGKLFF	4	4.59712e-05	TCRBV28-01*01	TCRBD01-01*01	TCRBJ01-04*01
CTGGAGTCCGCCAGCACCAACCAGACATCTATGTACCTCTGTGCCAGCAGTTTATTACAGAGCAATCAGCCCCAGCATTTTGGTGAT	CASSLLQSNQPQHF	4	4.59712e-05	TCRBV28-01*01	TCRBD01-01*01	TCRBJ01-05*01
GAGTCCGCCAGCACCAACCAGACATCTATGTACCTCTGTGCCAGCAGTTTATTGGCCGGGGTTCGGGAAAAACTGTTTTTTGGCAGT	CASSLLAGVREKLFF	4	4.59712e-05	TCRBV28-01*01	TCRBD02-01*01	TCRBJ01-04*01
CTGGAGTCCGCCAGCACCAACCAGACATCTATGTACCTCTGTGCCAGCAGCACGATACAGGGGGTGAATACGCAGTATTTTGGCCCA	CASSTIQGVNTQYF	4	4.59712e-05	TCRBV28-01*01	TCRBD01-01*01	TCRBJ02-03*01
ACGATCCAGCGCACACAGCAGGAGGACTCGGCCGTGTATCTCTGTGCCAGCAGCCCCGAGATAGGAAACACCATATATTTTGGAGAG	CASSPEIGNTIYF	4	4.59712e-05	TCRBV07-02*01	TCRBD02-01*02	TCRBJ01-03*01
CAGCGCACACAGCAGGAGGACTCGGCCGTGTATCTCTGTGCCAGCAGCTTGGAGGTTTCTAGCAATCAGCCCCAGCATTTTGGTGAT	CASSLEVSSNQPQHF	4	4.59712e-05	TCRBV07-02*01	TCRBD02-01*02	TCRBJ01-05*01
CAGCGCACACAGCAGGAGGACTCGGCCGTGTATCTCTGTGCCAGCAGCTTATCGACAGGTCAAGGCCAGCCCCAGCATTTTGGTGAT	CASSLSTGQGQPQHF	4	4.59712e-05	TCRBV07-02*01	TCRBD01-01*01	TCRBJ01-05*01
ATCCAGCGCACACAGCAGGAGGACTCGGCCGTGTATCTCTGTGCCAGCAGCCTATATGGGACCAACACTGAAGCTTTCTTTGGACAA	CASSLYGTNTEAFF	4	4.59712e-05	TCRBV07-02*01		TCRBJ01-01*01
CGCACACAGCAGGAGGACTCGGCCGTGTATCTCTGTGCCAGCAGCTCCTGGACAGGACCTACACAATATACGCAGTATTTTGGCCCA	CASSSWTGPTQYTQYF	4	4.59712e-05	TCRBV07-02*01	TCRBD01-01*01	TCRBJ02-03*01
CAGCGCACACAGCAGGAGGACTCGGCCGTGTATCTCTGTGCCAGCAGCTCCCACAGGGGATTTAACTATGGCTACACCTTCGGTTCG	CASSSHRGFNYGYTF	4	4.59712e-05	TCRBV07-02*01	TCRBD01-01*01	TCRBJ01-02*01
CAGCGCACACAGCAGGAGGACTCGGCCGTGTATCTCTGTGCCAGCAGCTCTGGGACAGGGGGTAGGTCACCCCTCCACTTTGGGAAC	CASSSGTGGRSPLHF	4	4.59712e-05	TCRBV07-02*01	TCRBD01-01*01	TCRBJ01-06*01
CTGACGATCCAGCGCACACAGCAGGAGGACTCGGCCGTGTATCTCTGTGCCAGCAGCCCCGGGCCCCACGAGCAGTACTTCGGGCCG	CASSPGPHEQYF	4	4.59712e-05	TCRBV07-02*01		TCRBJ02-07*01
GAGTCGCCCAGCCCCAACCAGACCTCTCTGTACTTCTGTGCCAGCAGCTCAAGCCTACAGGGGGCTGCGAGCTACACCTTCGGTTCG	CASSSSLQGAASYTF	4	4.59712e-05	TCRBV27-01*01	TCRBD01-01*01	TCRBJ01-02*01
TCGCCCAGCCCCAACCAGACCTCTCTGTACTTCTGTGCCAGCAGTTCGAATTATAACAGAGCGAACTATGGCTACACCTTCGGTTCG	CASSSNYNRANYGYTF	4	4.59712e-05	TCRBV27-01*01		TCRBJ01-02*01
ATCCTGGAGTCGCCCAGCCCCAACCAGACCTCTCTGTACTTCTGTGCCAGCAGTTTACAGGGAAGTTCACCCCTCCACTTTGGGAAC	CASSLQGSSPLHF	4	4.59712e-05	TCRBV27-01*01	TCRBD01-01*01	TCRBJ01-06*01
GAGTCGCCCAGCCCCAACCAGACCTCTCTGTACTTCTGTGCCAGCACCGACCCAGCAGACAGGTATTCACCCCTCCACTTTGGGAAC	CASTDPADRYSPLHF	4	4.59712e-05	TCRBV27-01*01	TCRBD01-01*01	TCRBJ01-06*01
GAGTCGCCCAGCCCCAACCAGACCTCTCTGTACTTCTGTGCCAGCAGTTTAAGCAAATCTGGGGCCAACGTCCTGACTTTCGGGGCC	CASSLSKSGANVLTF	4	4.59712e-05	TCRBV27-01*01	TCRBD02-01	TCRBJ02-06*01
TCCACGGAGTCAGGGGACACAGCACTGTATTTCTGTGCCAGCAGCAAAGGGTCAGGGCGGGAGGTCACTGAAGCTTTCTTTGGACAA	CASSKGSGREVTEAFF	4	4.59712e-05	TCRBV21-01*01	TCRBD02-01*02	TCRBJ01-01*01
TTGGAGATCCAGTCCACGGAGTCAGGGGACACAGCACTGTATTTCTGTGCCACGGAAGAACAGGGATACGAGCAGTACTTCGGGCCG	CATEEQGYEQYF	4	4.59712e-05	TCRBV21-01*01	TCRBD01-01*01	TCRBJ02-07*01
GCTACCAGCTCCCAGACATCTGTGTACTTCTGTGCCATCAGTGAGGCCTCTAGCGGGGGGCACCAAGAGACCCAGTACTTCGGGCCA	CAISEASSGGHQETQYF	4	4.59712e-05	TCRBV10-03*01	TCRBD02-01*01	TCRBJ02-05*01
CTCCTCACTCTGGAGTCCGCTACCAGCTCCCAGACATCTGTGTACTTCTGTGCCATCAGTGACTCAGCCTTCTACACCTTCGGTTCG	CAISDSAFYTF	4	4.59712e-05	TCRBV10-03*01		TCRBJ01-02*01
CTGGAGTCCGCTACCAGCTCCCAGACATCTGTGTACTTCTGTGCCATCAGTAGGGCGACAGGGTCGAGGGAGCAGTACTTCGGGCCG	CAISRATGSREQYF	4	4.59712e-05	TCRBV10-03*01	TCRBD01-01*01	TCRBJ02-07*01
CTGGAGTCCGCTACCAGCTCCCAGACATCTGTGTACTTCTGTGCCATCAGTGGCCTAAAAGACACTCAGCCCCAGCATTTTGGTGAT	CAISGLKDTQPQHF	4	4.59712e-05	TCRBV10-03*01	TCRBD01-01*01	TCRBJ01-05*01
CTGGAGTCCGCTACCAGCTCCCAGACATCTGTGTACTTCTGTGCCATCGCGGGCCCAGCGGGCACAGATACGCAGTATTTTGGCCCA	CAIAGPAGTDTQYF	4	4.59712e-05	TCRBV10-03*01	TCRBD02-01	TCRBJ02-03*01
ACTCTGGAGTCCGCTACCAGCTCCCAGACATCTGTGTACTTCTGTGCCTTAACAGGGGAGTGGGGTCAGCCCCAGCATTTTGGTGAT	CALTGEWGQPQHF	4	4.59712e-05	TCRBV10-03*01	TCRBD01-01*01	TCRBJ01-05*01
CTCACTCTGGAGTCCGCTACCAGCTCCCAGACATCTGTGTACTTCTGTGCCACCGGTGACAGGGACTATGGCTACACCTTCGGTTCG	CATGDRDYGYTF	4	4.59712e-05	TCRBV10-03*01	TCRBD01-01*01	TCRBJ01-02*01
TTCCCCCTGATCCTGGAGTCGCCCAGCCCCAACCAGACCTCTCTGTACTTCTGTGCCAGCAGTTTAAGGGAGCAGTTCTTCGGGCCA	CASSLREQFF	4	4.59712e-05	TCRBV27-01*01		TCRBJ02-01*01
CTGGAGTCGCCCAGCCCCAACCAGACCTCTCTGTACTTCTGTGCCAGCATCCCGGACAGGGTGGGCACTGAAGCTTTCTTTGGACAA	CASIPDRVGTEAFF	4	4.59712e-05	TCRBV27-01*01	TCRBD01-01*01	TCRBJ01-01*01
CTGATCCTGGAGTCGCCCAGCCCCAACCAGACCTCTCTGTACTTCTGTGCCAGCAGTTCTGGCTGGGGGGCCCAGTACTTCGGGCCA	CASSSGWGAQYF	4	4.59712e-05	TCRBV27-01*01	TCRBD02-01*01	TCRBJ02-05*01
CTGGAGTCGCCCAGCCCCAACCAGACCTCTCTGTACTTCTGTGCCAGCAGCCTAGGGGGCGTTGGTTCACCCCTCCACTTTGGGAAC	CASSLGGVGSPLHF	4	4.59712e-05	TCRBV27-01*01	TCRBD01-01*01	TCRBJ01-06*01
CTGGAGTCGCCCAGCCCCAACCAGACCTCTCTGTACTTCTGTGCCAGCAGCCGTGGACAGGACTATGAAAAACTGTTTTTTGGCAGT	CASSRGQDYEKLFF	4	4.59712e-05	TCRBV27-01*01	TCRBD01-01*01	TCRBJ01-04*01
TCGCCCAGCCCCAACCAGACCTCTCTGTACTTCTGTGCCAGCAGTTTATTGCCGGGAGGGGGCACAGATACGCAGTATTTTGGCCCA	CASSLLPGGGTDTQYF	4	4.59712e-05	TCRBV27-01*01	TCRBD02-01*02	TCRBJ02-03*01
GAGTCGCCCAGCCCCAACCAGACCTCTCTGTACTTCTGTGCCAGCAGTCGGTGGGGGACCTACACAGATACGCAGTATTTTGGCCCA	CASSRWGTYTDTQYF	4	4.59712e-05	TCRBV27-01*01		TCRBJ02-03*01
ATCCTGGAGTCGCCCAGCCCCAACCAGACCTCTCTGTACTTCTGTGCCAGCTGTGGAAACGACAGGGAAAATGAGTACTTCGGGCCG	CASCGNDRENEYF	4	4.59712e-05	TCRBV27-01*01	TCRBD01-01*01	TCRBJ02-07*01
ATCCTGGAGTCGCCCAGCCCCAACCAGACCTCTCTGTACTTCTGTGCCAGCAGGGGGACAGGGCGAAATGAGCAGTTCTTCGGGCCA	CASRGTGRNEQFF	4	4.59712e-05	TCRBV27-01*01	TCRBD01-01*01	TCRBJ02-01*01
CCCAGCCCCAACCAGACCTCTCTGTACTTCTGTGCCAGCAGTCTAGCGGCGGGGGGGGTTTCCTACAATGAGCAGTTCTTCGGGCCA	CASSLAAGGVSYNEQFF	4	4.59712e-05	TCRBV27-01*01	TCRBD02-01*01	TCRBJ02-01*01
TCGCCCAGCCCCAACCAGACCTCTCTGTACTTCTGTGCCAGCAGTTCGTCGACAGGGGGCTGGGACACTGAAGCTTTCTTTGGACAA	CASSSSTGGWDTEAFF	4	4.59712e-05	TCRBV27-01*01	TCRBD01-01*01	TCRBJ01-01*01
TCGCCCAGCCCCAACCAGACCTCTCTGTACTTCTGTGCCAGCAGTTTGTTCCGGGAGGGTAGTCCAGATACGCAGTATTTTGGCCCA	CASSLFREGSPDTQYF	4	4.59712e-05	TCRBV27-01*01	TCRBD02-01*02	TCRBJ02-03*01
CCCAGCCCCAACCAGACCTCTCTGTACTTCTGTGCCAGCAGTCTCGTCCCTACGGATGATGGGAGATATGGCTACACCTTCGGTTCG	CASSLVPTDDGRYGYTF	4	4.59712e-05	TCRBV27-01*01	TCRBD02-01*02	TCRBJ01-02*01
CCCCTGATCCTGGAGTCGCCCAGCCCCAACCAGACCTCTCTGTACTTCTGTGCCAGCAGCTCCCGTGGACTAGCTTTCTTTGGACAA	CASSSRGLAFF	4	4.59712e-05	TCRBV27-01*01	TCRBD02-01	TCRBJ01-01*01
GAGTCGCCCAGCCCCAACCAGACCTCTCTGTACTTCTGTGCCAGCAGTTTCCGCGGCGACAGCCACTATGGCTACACCTTCGGTTCG	CASSFRGDSHYGYTF	4	4.59712e-05	TCRBV27-01*01	TCRBD01-01*01	TCRBJ01-02*01
CTGATCCTGGAGTCGCCCAGCCCCAACCAGACCTCTCTGTACTTCTGTGCCAGCAGAGCAGCTAACTATGGCTACACCTTCGGTTCG	CASRAANYGYTF	4	4.59712e-05	TCRBV27-01*01		TCRBJ01-02*01
CAGTCCACGGAGTCAGGGGACACAGCACTGTATTTCTGTGCCAGCAGCGAACCGGGACAAGAGGGAGAGACCCAGTACTTCGGGCCA	CASSEPGQEGETQYF	4	4.59712e-05	TCRBV21-01*01	TCRBD01-01*01	TCRBJ02-05*01
GAGATCCAGTCCACGGAGTCAGGGGACACAGCACTGTATTTCTGTGCCAGCAGCAATACGGGGGGCGGCGAGCAGTACTTCGGGCCG	CASSNTGGGEQYF	4	4.59712e-05	TCRBV21-01*01	TCRBD02-01*01	TCRBJ02-07*01
ATCCAGTCCACGGAGTCAGGGGACACAGCACTGTATTTCTGTGCCAGCAGCACCGGGGTAACTAATGAAAAACTGTTTTTTGGCAGT	CASSTGVTNEKLFF	4	4.59712e-05	TCRBV21-01*01	TCRBD02-01*01	TCRBJ01-04*01
ATCCAGCGCACACAGCAGGAGGACTCGGCCGTGTATCTCTGTGCCAGCAGCTTAGGCGGGGGCGCTCGCGAGCAGTACTTCGGGCCG	CASSLGGGAREQYF	4	4.59712e-05	TCRBV07-02*01	TCRBD02-01*01	TCRBJ02-07*01
ATCCAGCGCACACAGCAGGAGGACTCGGCCGTGTATCTCTGTGCCAGCAGCTTAGCGACGGGGAACTATGGCTACACCTTCGGTTCG	CASSLATGNYGYTF	4	4.59712e-05	TCRBV07-02*01	TCRBD02-01*01	TCRBJ01-02*01
ACGATCCAGCGCACACAGCAGGAGGACTCGGCCGTGTATCTCTGTGCCAGCAGCGTAGGACCTAATTCACCCCTCCACTTTGGGAAC	CASSVGPNSPLHF	4	4.59712e-05	TCRBV07-02*01		TCRBJ01-06*01
ACGATCCAGCGCACACAGCAGGAGGACTCGGCCGTGTATCTCTGTGCCAGCAGACCGGACAGAAACACTGAAGCTTTCTTTGGACAA	CASRPDRNTEAFF	4	4.59712e-05	TCRBV07-02*01	TCRBD01-01*01	TCRBJ01-01*01
CAGCGCACACAGCAGGAGGACTCGGCCGTGTATCTCTGTGCCAGCAGCTTAAGAAGGACAGGAAAGGATGAGCAGTTCTTCGGGCCA	CASSLRRTGKDEQFF	4	4.59712e-05	TCRBV07-02*01	TCRBD01-01*01	TCRBJ02-01*01
CGCACACAGCAGGAGGACTCGGCCGTGTATCTCTGTGCCAGCAGCTTTCACAGGGCCCCCTCTGGAAACACCATATATTTTGGAGAG	CASSFHRAPSGNTIYF	4	4.59712e-05	TCRBV07-02*01	TCRBD01-01*01	TCRBJ01-03*01
ATCCAGCGCACACAGCAGGAGGACTCGGCCGTGTATCTCTGTGCCAGCAGCTTAGCGCTCCGAACAGATACGCAGTATTTTGGCCCA	CASSLALRTDTQYF	4	4.59712e-05	TCRBV07-02*01		TCRBJ02-03*01
CAGCAGGAGGACTCGGCCGTGTATCTCTGTGCCAGCAGCTTAGGAAACCTAGCGGGGCACAGCACAGATACGCAGTATTTTGGCCCA	CASSLGNLAGHSTDTQYF	4	4.59712e-05	TCRBV07-02*01	TCRBD02-01*01	TCRBJ02-03*01
ACGATCCAGCGCACACAGCAGGAGGACTCGGCCGTGTATCTCTGTGCCAGCAGCCCCGACAGAAATCAGCCCCAGCATTTTGGTGAT	CASSPDRNQPQHF	4	4.59712e-05	TCRBV07-02*01	TCRBD01-01*01	TCRBJ01-05*01
CAGCGCACACAGCAGGAGGACTCGGCCGTGTATCTCTGTGCCAGCAGTCGAAGCGGGGGGAAATACAATGAGCAGTTCTTCGGGCCA	CASSRSGGKYNEQFF	4	4.59712e-05	TCRBV07-02*01	TCRBD02-01*01	TCRBJ02-01*01
CAGCGCACACAGCAGGAGGACTCGGCCGTGTATCTCTGTGCCAGCAGCTGGGCTAGCGGGGGTGGGGAGACCCAGTACTTCGGGCCA	CASSWASGGGETQYF	4	4.59712e-05	TCRBV07-02*01	TCRBD02-01*01	TCRBJ02-05*01
ATCCAGCGCACACAGCAGGAGGACTCGGCCGTGTATCTCTGTGCCAGCAGCCAGGCAACTGGGTTCAATGAGCAGTTCTTCGGGCCA	CASSQATGFNEQFF	4	4.59712e-05	TCRBV07-02*01	TCRBD01-01*01	TCRBJ02-01*01
CAGGAGGACTCGGCCGTGTATCTCTGTGCCAGCAGCTGGCGTGGGGTATGGTCTCGGGGCGGTAACGATGGCTACACCTTCGGTTCG	CASSWRGVWSRGGNDGYTF	4	4.59712e-05	TCRBV07-02*01		TCRBJ01-02*01
ATCCAGCGCACACAGCAGGAGGACTCGGCCGTGTATCTCTGTGCCAGCAGCCGACTAGCGGGGGTTGGTGAGCAGTTCTTCGGGCCA	CASSRLAGVGEQFF	4	4.59712e-05	TCRBV07-02*01	TCRBD02-01*01	TCRBJ02-01*01
CAGCGCACACAGCAGGAGGACTCGGCCGTGTATCTCTGTGCCAGCAGCTTCGGGACAGGGTTCGGGTCACCCCTCCACTTTGGGAAC	CASSFGTGFGSPLHF	4	4.59712e-05	TCRBV07-02*01	TCRBD01-01*01	TCRBJ01-06*01
CAGCGCACACAGCAGGAGGACTCGGCCGTGTATCTCTGTGCCAGCAGCTTACTCAGGAGCTCTGGAAACACCATATATTTTGGAGAG	CASSLLRSSGNTIYF	4	4.59712e-05	TCRBV07-02*01		TCRBJ01-03*01
CGCACACAGCAGGAGGACTCGGCCGTGTATCTCTGTGCCAGCAGCTTAGCTCATATTTCGAACACCGGGGAGCTGTTTTTTGGAGAA	CASSLAHISNTGELFF	4	4.59712e-05	TCRBV07-02*01		TCRBJ02-02*01
ACTGTGAGCAACATGAGCCCTGAAGACAGCAGCATATATCTCTGCAGCGTTGCTTGGGGGGCAGGCACTGAAGCTTTCTTTGGACAA	CSVAWGAGTEAFF	4	4.59712e-05	TCRBV29-01*01		TCRBJ01-01*01
ACTGTGAGCAACATGAGCCCTGAAGACAGCAGCATATATCTCTGCAGCGTTGGGCAGAATTCCATTATCAAGCAGTTCTTCGGGCCA	CSVGQNSIIKQFF	4	4.59712e-05	TCRBV29-01*01	TCRBD01-01*01	TCRBJ02-01*01
CTGACTGTGAGCAACATGAGCCCTGAAGACAGCAGCATATATCTCTGCAGCGTTGTTCATAGAGACACTGAAGCTTTCTTTGGACAA	CSVVHRDTEAFF	4	4.59712e-05	TCRBV29-01*01	TCRBD02-01	TCRBJ01-01*01
ACTGTGAGCAACATGAGCCCTGAAGACAGCAGCATATATCTCTGCAGCGTTGAAGGACTTAACACCGGGGAGCTGTTTTTTGGAGAA	CSVEGLNTGELFF	4	4.59712e-05	TCRBV29-01*01	TCRBD02-01	TCRBJ02-02*01
CTGACTGTGAGCAACATGAGCCCTGAAGACAGCAGCATATATCTCTGCAGCGTTGGGGCGGCGAACACTGAAGCTTTCTTTGGACAA	CSVGAANTEAFF	4	4.59712e-05	TCRBV29-01*01		TCRBJ01-01*01
ACTGTGAGCAACATGAGCCCTGAAGACAGCAGCATATATCTCTGCAGCGTTACAAAAACTAGCTTAGAGACCCAGTACTTCGGGCCA	CSVTKTSLETQYF	4	4.59712e-05	TCRBV29-01*01	TCRBD02-01	TCRBJ02-05*01
ACTGTGAGCAACATGAGCCCTGAAGACAGCAGCATATATCTCTGCAGCGTTGGAAAGGGTTCTGGAAACACCATATATTTTGGAGAG	CSVGKGSGNTIYF	4	4.59712e-05	TCRBV29-01*01		TCRBJ01-03*01
GTGAGCAACATGAGCCCTGAAGACAGCAGCATATATCTCTGCAGCGTTGAAGAGGGGACTGCGCGTCTGGGCTACACCTTCGGTTCG	CSVEEGTARLGYTF	4	4.59712e-05	TCRBV29-01*01	TCRBD02-01	TCRBJ01-02*01
ACTCTGACTGTGAGCAACATGAGCCCTGAAGACAGCAGCATATATCTCTGCAGCGTTCAGGAATACTCTGGCTACACCTTCGGTTCG	CSVQEYSGYTF	4	4.59712e-05	TCRBV29-01*01	TCRBD01-01*01	TCRBJ01-02*01
AGCAACATGAGCCCTGAAGACAGCAGCATATATCTCTGCAGCGTTCTAGTTACATTCGGCCTTTCCGGGGAGCTGTTTTTTGGAGAA	CSVLVTFGLSGELFF	4	4.59712e-05	TCRBV29-01*01	TCRBD02-01	TCRBJ02-02*01
ACTGTGAGCAACATGAGCCCTGAAGACAGCAGCATATATCTCTGCAGCGCCGACGGGATTAGCACAGATACGCAGTATTTTGGCCCA	CSADGISTDTQYF	4	4.59712e-05	TCRBV29-01*01	TCRBD02-01*02	TCRBJ02-03*01
GTGAGCAACATGAGCCCTGAAGACAGCAGCATATATCTCTGCAGCGTTGCCCAGCGAGGCCCTAACAATGAGCAGTTCTTCGGGCCA	CSVAQRGPNNEQFF	4	4.59712e-05	TCRBV29-01*01	TCRBD02-01	TCRBJ02-01*01
ACTGTGAGCAACATGAGCCCTGAAGACAGCAGCATATATCTCTGCAGCGTTAGAAGGCAGAACACCGGGGAGCTGTTTTTTGGAGAA	CSVRRQNTGELFF	4	4.59712e-05	TCRBV29-01*01		TCRBJ02-02*01
AGCAACATGAGCCCTGAAGACAGCAGCATATATCTCTGCAGCGCCTACTACCCCGGACAGGGCTACAATGAGCAGTTCTTCGGGCCA	CSAYYPGQGYNEQFF	4	4.59712e-05	TCRBV29-01*01	TCRBD01-01*01	TCRBJ02-01*01
ACTGTGAGCAACATGAGCCCTGAAGACAGCAGCATATATCTCTGCAGCGTTGAAATGCGACAGGGATCGGAAGCTTTCTTTGGACAA	CSVEMRQGSEAFF	4	4.59712e-05	TCRBV29-01*01	TCRBD01-01*01	TCRBJ01-01*01
AGCAACATGAGCCCTGAAGACAGCAGCATATATCTCTGCAGCGTGGGACAGGGCAGCTCTGGGGCCAACGTCCTGACTTTCGGGGCC	CSVGQGSSGANVLTF	4	4.59712e-05	TCRBV29-01*01	TCRBD01-01*01	TCRBJ02-06*01
GTGAGCAACATGAGCCCTGAAGACAGCAGCATATATCTCTGCAGCGTTGAAGAGAAGGGCGTCCGCTATGGCTACACCTTCGGTTCG	CSVEEKGVRYGYTF	4	4.59712e-05	TCRBV29-01*01		TCRBJ01-02*01
ATCCAGCGCACACAGCAGGAGGACTCGGCCGTGTATCTCTGTGCCAGCAGCTTAGCCATATCAGCAGATACGCAGTATTTTGGCCCA	CASSLAISADTQYF	4	4.59712e-05	TCRBV07-02*01	TCRBD01-01*01	TCRBJ02-03*01
ACGATCCAGCGCACACAGCAGGAGGACTCGGCCGTGTATCTCTGTGCCAGCAGCTTAGGGGGAAGCTATGGCTACACCTTCGGTTCG	CASSLGGSYGYTF	4	4.59712e-05	TCRBV07-02*01		TCRBJ01-02*01
ACGATCCAGCGCACACAGCAGGAGGACTCGGCCGTGTATCTCTGTGCCAGCAGCTTGGGAATACCAGAGACCCAGTACTTCGGGCCA	CASSLGIPETQYF	4	4.59712e-05	TCRBV07-02*01		TCRBJ02-05*01
ATCCAGCGCACACAGCAGGAGGACTCGGCCGTGTATCTCTGTGCCAGCAGCTCCGATCACTCAGAACAGCCCCAGCATTTTGGTGAT	CASSSDHSEQPQHF	4	4.59712e-05	TCRBV07-02*01		TCRBJ01-05*01
GTCTCCACTCTGACGATCCAGCGCACACAGCAGGAGGACTCGGCCGTGTATCTCTGTGCCAGCAGCTTATATCCGGGTTTCGGGCCG	CASSLYPGF	4	4.59712e-05	TCRBV07-02*01	TCRBD02-01	TCRBJ02-07*01
ACGATCCAGCGCACACAGCAGGAGGACTCGGCCGTGTATCTCTGTGCCAGCAGCTTCACAGGGGTTTCACCCCTCCACTTTGGGAAC	CASSFTGVSPLHF	4	4.59712e-05	TCRBV07-02*01	TCRBD01-01*01	TCRBJ01-06*01
ACACAGCAGGAGGACTCGGCCGTGTATCTCTGTGCCAGCAGCTTAGCGCCTAGCGGGGGTAGCACAGATACGCAGTATTTTGGCCCA	CASSLAPSGGSTDTQYF	4	4.59712e-05	TCRBV07-02*01	TCRBD02-01*01	TCRBJ02-03*01
CAGCGCACACAGCAGGAGGACTCGGCCGTGTATCTCTGTGCCAGCAGCTTAGACCCAGCCCGTAATGAAAAACTGTTTTTTGGCAGT	CASSLDPARNEKLFF	4	4.59712e-05	TCRBV07-02*01		TCRBJ01-04*01
ATCCAGCGCACACAGCAGGAGGACTCGGCCGTGTATCTCTGTGCCAGCAGTGCCAGGCGGGCGGACGGGGAGCTGTTTTTTGGAGAA	CASSARRADGELFF	4	4.59712e-05	TCRBV07-02*01	TCRBD02-01	TCRBJ02-02*01
CCTGCAAAGCTTGAGGACTCGGCCGTGTATCTCTGTGCCAGCAGCTCTCACACGAGCTCCTATAATTCACCCCTCCACTTTGGGAAC	CASSSHTSSYNSPLHF	4	4.59712e-05	TCRBV11-02*02		TCRBJ01-06*01
GTGACATCGGCCCAAAAGAACCCGACAGCTTTCTATCTCTGTGCCAGTAGTGGGCGCTACGGCGTATACGAGCAGTACTTCGGGCCG	CASSGRYGVYEQYF	4	4.59712e-05	TCRBV19-01	TCRBD01-01*01	TCRBJ02-07*01
GCCCAAAAGAACCCGACAGCTTTCTATCTCTGTGCCAGTACCCGGGGACTCACACACTCCTATAATTCACCCCTCCACTTTGGGAAC	CASTRGLTHSYNSPLHF	4	4.59712e-05	TCRBV19-01	TCRBD02-01	TCRBJ01-06*01
ACATCGGCCCAAAAGAACCCGACAGCTTTCTATCTCTGTGCCAGTAGCAAAATCCGGGGGAATTCGAACGAGCAGTACTTCGGGCCG	CASSKIRGNSNEQYF	4	4.59712e-05	TCRBV19-01	TCRBD02-01*01	TCRBJ02-07*01
GCCCAAAAGAACCCGACAGCTTTCTATCTCTGTGCCAGTAGTATTACTACCGGGACAGGGTATAATTCACCCCTCCACTTTGGGAAC	CASSITTGTGYNSPLHF	4	4.59712e-05	TCRBV19-01	TCRBD01-01*01	TCRBJ01-06*01
CTCAAGATCCAGCCTGCAAAGCTTGAGGACTCGGCCGTGTATCTCTGTGCCAGCAGCTTAGTTGCCGCGACCCAGTACTTCGGGCCA	CASSLVAATQYF	4	4.59712e-05	TCRBV11-02*02		TCRBJ02-05*01
CAGCCTGCAAAGCTTGAGGACTCGGCCGTGTATCTCTGTGCCAGCAGCTTAGTACAGGGCGACAATTCACCCCTCCACTTTGGGAAC	CASSLVQGDNSPLHF	4	4.59712e-05	TCRBV11-02*02	TCRBD01-01*01	TCRBJ01-06*01
AAGCTTGAGGACTCGGCCGTGTATCTCTGTGCCAGCAGTCCCGGGACAGGATCCCAACCTCGGCCCGGGGAGCTGTTTTTTGGAGAA	CASSPGTGSQPRPGELFF	4	4.59712e-05	TCRBV11-02*02	TCRBD01-01*01	TCRBJ02-02*01
CCTGCAAAGCTTGAGGACTCGGCCGTGTATCTCTGTGCCAGCAGCTTAGCCCCTGGAGCGCCGGGTGGGGAGCAGTACTTCGGGCCG	CASSLAPGAPGGEQYF	4	4.59712e-05	TCRBV11-02*02	TCRBD02-01	TCRBJ02-07*01
AAGATCCAGCCTGCAAAGCTTGAGGACTCGGCCCTGTATCTCTGCGCCAGCAGCTCCGGGACGGACTACGAGCAGTACTTCGGGCCG	CASSSGTDYEQYF	4	4.59712e-05	TCRBV11-02*02		TCRBJ02-07*01
CCTGCAAAGCTTGAGGACTCGGCCGTGTATCTCTGTGCCAGCAGCTTAGGAGTGGCGGCTTCCTACAATGAGCAGTTCTTCGGGCCA	CASSLGVAASYNEQFF	4	4.59712e-05	TCRBV11-02*02	TCRBD02-01	TCRBJ02-01*01
ATCCAGCCTGCAAAGCTTGAGGACTCGGCCGTGTATCTCTGTGCCAGCAGCTTAAATGAGGTTAACTATGGCTACACCTTCGGTTCG	CASSLNEVNYGYTF	4	4.59712e-05	TCRBV11-02*02	TCRBD02-01*02	TCRBJ01-02*01
CAGCCTGCAAAGCTTGAGGACTCGGCCGTGTATCTCTGTGCCAGCAGCTTAGCTCCGGGTCAGAATTCACCCCTCCACTTTGGGAAC	CASSLAPGQNSPLHF	4	4.59712e-05	TCRBV11-02*02	TCRBD02-01	TCRBJ01-06*01
CAGCCTGCAAAGCTTGAGGACTCGGCCGTGTATCTCTGTGCCAGCAGCCCCTCACGGTTGCAGGGCTACGAGCAGTACTTCGGGCCG	CASSPSRLQGYEQYF	4	4.59712e-05	TCRBV11-02*02	TCRBD01-01*01	TCRBJ02-07*01
CCTGCAAAGCTTGAGGACTCGGCCGTGTATCTCTGTGCCAGCAGCTTAGATCATACAGGGGGCGTAGAGACCCAGTACTTCGGGCCA	CASSLDHTGGVETQYF	4	4.59712e-05	TCRBV11-02*02	TCRBD01-01*01	TCRBJ02-05*01
CTCACTGTGACATCGGCCCAAAAGAACCCGACAGCTTTCTATCTCTGTGCCAGTAGCGGGGACAAAGGGAGGCAGTATTTTGGCCCA	CASSGDKGRQYF	4	4.59712e-05	TCRBV19-01	TCRBD01-01*01	TCRBJ02-03*01
ACTGTGACATCGGCCCAAAAGAACCCGACAGCTTTCTATCTCTGTGCCAGTAGTATCGTAAGCAATCAGCCCCAGCATTTTGGTGAT	CASSIVSNQPQHF	4	4.59712e-05	TCRBV19-01	TCRBD02-01	TCRBJ01-05*01
ACATCGGCCCAAAAGAACCCGACAGCTTTCTATCTCTGTGCCAGTAGTATATCCCAGGGGCTTAATGAAAAACTGTTTTTTGGCAGT	CASSISQGLNEKLFF	4	4.59712e-05	TCRBV19-01	TCRBD01-01*01	TCRBJ01-04*01
GTGACATCGGCCCAAAAGAACCCGACAGCTTTCTATCTCTGTGCCAGAAACGGGGACAGGGTTACCTATGGCTACACCTTCGGTTCG	CARNGDRVTYGYTF	4	4.59712e-05	TCRBV19-01	TCRBD01-01*01	TCRBJ01-02*01
CAGCCTGCAAAGCTTGAGGACTCGGCCGTGTATCTCTGTGCCAGCAGCTTAGTTGGGGGGCAGGCAGATACGCAGTATTTTGGCCCA	CASSLVGGQADTQYF	4	4.59712e-05	TCRBV11-02*02		TCRBJ02-03*01
AAGATCCAGCCTGCAAAGCTTGAGGACTCGGCCGTGTATCTCTGTGCCAGCAGCTTAGGTGGAAATCAGCCCCAGCATTTTGGTGAT	CASSLGGNQPQHF	4	4.59712e-05	TCRBV11-02*02		TCRBJ01-05*01
ATCCAGCCTGCAAAGCTTGAGGACTCGGCCGTGTATCTCTGTGCCAGCAGCTTAGGGCCAGACAACTATGGCTACACCTTCGGTTCG	CASSLGPDNYGYTF	4	4.59712e-05	TCRBV11-02*02		TCRBJ01-02*01
CAGCCTGCAAAGCTTGAGGACTCGGCCGTGTATCTCTGTGCCAGCAGCTCACAGGGTTCTGAGAATTCACCCCTCCACTTTGGGAAC	CASSSQGSENSPLHF	4	4.59712e-05	TCRBV11-02*02	TCRBD01-01*01	TCRBJ01-06*01
CAGCCTGCAAAGCTTGAGGACTCGGCCGTGTATCTCTGTGCCAGCAGCTTAGAGGGGAACACGGGCTATGGCTACACCTTCGGTTCG	CASSLEGNTGYGYTF	4	4.59712e-05	TCRBV11-02*02		TCRBJ01-02*01
AAGATCCAGCCTGCAGAGCTTGGGGACTCGGCCGTGTATCTCTGTGCCAGCAGCTTCCCGGGCGGGGATACGCAGTATTTTGGCCCA	CASSFPGGDTQYF	4	4.59712e-05	TCRBV11-03*01	TCRBD02-01	TCRBJ02-03*01
GTGACATCGGCCCAAAAGAACCCGACAGCTTTCTATCTCTGTGCCAGTAGATCGGACAGGCTGAACTATGGCTACACCTTCGGTTCG	CASRSDRLNYGYTF	4	4.59712e-05	TCRBV19-01	TCRBD01-01*01	TCRBJ01-02*01
GTGACATCGGCCCAAAAGAACCCGACAGCTTTCTATCTCTGTGCCAGCCGGGTGGGCTTTCGCACCGGGGAGCTGTTTTTTGGAGAA	CASRVGFRTGELFF	4	4.59712e-05	TCRBV19-01		TCRBJ02-02*01
GTGACATCGGCCCAAAAGAACCCGACAGCTTTCTATCTCTGTGCCAGTAGTGTATCTCATAGCAATCAGCCCCAGCATTTTGGTGAT	CASSVSHSNQPQHF	4	4.59712e-05	TCRBV19-01		TCRBJ01-05*01
ACATCGGCCCAAAAGAACCCGACAGCTTTCTATCTCTGTGCCAGTAGCGGGCGAAAGATAACTAATGAAAAACTGTTTTTTGGCAGT	CASSGRKITNEKLFF	4	4.59712e-05	TCRBV19-01		TCRBJ01-04*01
TCGGCCCAAAAGAACCCGACAGCTTTCTATCTCTGTGCCAGTAGTGCCGTACTAGCGGGGGGCCTGTACGAGCAGTACTTCGGGCCG	CASSAVLAGGLYEQYF	4	4.59712e-05	TCRBV19-01	TCRBD02-01*01	TCRBJ02-07*01
ACATCGGCCCAAAAGAACCCGACAGCTTTCTATCTCTGTGCCAGTAGTACCATGGGGGGAACTGGAAACACCATATATTTTGGAGAG	CASSTMGGTGNTIYF	4	4.59712e-05	TCRBV19-01	TCRBD02-01*01	TCRBJ01-03*01
ACTGTGACATCGGCCCAAAAGAACCCGACAGCTTTCTATCTCTGTGCCAGTAGGTCAGGGAGGGGCTATGGCTACACCTTCGGTTCG	CASRSGRGYGYTF	4	4.59712e-05	TCRBV19-01	TCRBD02-01*02	TCRBJ01-02*01
TCGGCCCAAAAGAACCCGACAGCTTTCTATCTCTGTGCCAGTCCCCCTTCCCCGGGACAGGGGTCCAAGACCCAGTACTTCGGGCCA	CASPPSPGQGSKTQYF	4	4.59712e-05	TCRBV19-01	TCRBD01-01*01	TCRBJ02-05*01
ACTGTGACATCGGCCCAAAAGAACCCGACAGCTTTCTATCTCTGTGCCAGTAGTATTACCGTGAACTATGGCTACACCTTCGGTTCG	CASSITVNYGYTF	4	4.59712e-05	TCRBV19-01		TCRBJ01-02*01
TCGGCCCAAAAGAACCCGACAGCTTTCTATCTCTGTGCCAGTAACCCCACTCTAGGGGGGCGCGGCTATGGCTACACCTTCGGTTCG	CASNPTLGGRGYGYTF	4	4.59712e-05	TCRBV19-01		TCRBJ01-02*01
ACTGTGACATCGGCCCAAAAGAACCCGACAGCTTTCTATCTCTGTGCCAGTAGTGTTCCGGGGGAAGAGACCCAGTACTTCGGGCCA	CASSVPGEETQYF	4	4.59712e-05	TCRBV19-01	TCRBD02-01*01	TCRBJ02-05*01
GTGACATCGGCCCAAAAGAACCCGACAGCTTTCTATCTCTGTGCCAGTAGTATAGGCCGGGACCGTTTGGGGGCCCACTTTGGGAAC	CASSIGRDRLGAHF	4	4.59712e-05	TCRBV19-01	TCRBD01-01*01	TCRBJ01-06*01
ACATCGGCCCAAAAGAACCCGACAGCTTTCTATCTCTGTGCCAGTAGTTTCGGGACAGGGGGTGGACAGCCCCAGCATTTTGGTGAT	CASSFGTGGGQPQHF	4	4.59712e-05	TCRBV19-01	TCRBD01-01*01	TCRBJ01-05*01
GTGACATCGGCCCAAAAGAACCCGACAGCTTTCTATCTCTGTGCCAGTACAGAATGGGGGAACACCGGGGAGCTGTTTTTTGGAGAA	CASTEWGNTGELFF	4	4.59712e-05	TCRBV19-01		TCRBJ02-02*01
GTGACATCGGCCCAAAAGAACCCGACAGCTTTCTATCTCTGTGCCAGTACCCGGGACAGCTCCTACAATGAGCAGTTCTTCGGGCCA	CASTRDSSYNEQFF	4	4.59712e-05	TCRBV19-01	TCRBD01-01*01	TCRBJ02-01*01
GTGACATCGGCCCAAAAGAACCCGACAGCTTTCTATCTCTGTGCCAGTAGGAGGCCGGATAGCGGCAATGAGCAGTTCTTCGGGCCA	CASRRPDSGNEQFF	4	4.59712e-05	TCRBV19-01	TCRBD02-01	TCRBJ02-01*01
ACATCGGCCCAAAAGAACCCGACAGCTTTCTATCTCTGTGCCAGTAGTATAACGGACTATAGCACAGATACGCAGTATTTTGGCCCA	CASSITDYSTDTQYF	4	4.59712e-05	TCRBV19-01	TCRBD02-01	TCRBJ02-03*01
GTGACATCGGCCCAAAAGAACCCGACAGCTTTCTATCTCTGTGCCAGTAGTGATACAGGGACTCGATACATTCAGTACTTCGGCGCC	CASSDTGTRYIQYF	4	4.59712e-05	TCRBV19-01		TCRBJ02-04*01
TCGGCCCAAAAGAACCCGACAGCTTTCTATCTCTGTGCCAGTGAGCCCACCCACAGGGGAAACACCGGGGAGCTGTTTTTTGGAGAA	CASEPTHRGNTGELFF	4	4.59712e-05	TCRBV19-01	TCRBD01-01*01	TCRBJ02-02*01
AACCCGACAGCTTTCTATCTCTGTGCCAGTAGCCCGAAGGAACTAGCGGGGGGGCCGGGTGGAGCCGGGGAGCTGTTTTTTGGAGAA	CASSPKELAGGPGGAGELFF	4	4.59712e-05	TCRBV19-01	TCRBD02-01*01	TCRBJ02-02*01
GTGACATCGGCCCAAAAGAACCCGACAGCTTTCTATCTCTGTGCCAGTAGTATTACACACCGGGGTGATACGCAGTATTTTGGCCCA	CASSITHRGDTQYF	4	4.59712e-05	TCRBV19-01	TCRBD02-01*01	TCRBJ02-03*01
TCGGCCCAAAAGAACCCGACAGCTTTCTATCTCTGTGCCAGTAGTGCCAGGACAGGGAGTGCCAAAAACATTCAGTACTTCGGCGCC	CASSARTGSAKNIQYF	4	4.59712e-05	TCRBV19-01	TCRBD01-01*01	TCRBJ02-04*01
ACATCGGCCCAAAAGAACCCGACAGCTTTCTATCTCTGTGCCAGTAGTGTCACCGGGACGGGGGCCTACGAGCAGTACTTCGGGCCG	CASSVTGTGAYEQYF	4	4.59712e-05	TCRBV19-01	TCRBD02-01*01	TCRBJ02-07*01
ACTGTGACATCGGCCCAAAAGAACCCGACAGCTTTCTATCTCTGTGCCAGCCTAGACAGAGTGAACACTGAAGCTTTCTTTGGACAA	CASLDRVNTEAFF	4	4.59712e-05	TCRBV19-01	TCRBD01-01*01	TCRBJ01-01*01
ACTGTGACATCGGCCCAAAAGAACCCGACAGCTTTCTATCTCTGTGCCAGTAGTTCACAGGGGGCCACTGAAGCTTTCTTTGGACAA	CASSSQGATEAFF	4	4.59712e-05	TCRBV19-01	TCRBD01-01*01	TCRBJ01-01*01
GTGACATCGGCCCAAAAGAACCCGACAGCTTTCTATCTCTGTGCCAGTACCATTTTCGGGCTGAACACTGAAGCTTTCTTTGGACAA	CASTIFGLNTEAFF	4	4.59712e-05	TCRBV19-01		TCRBJ01-01*01
ACTGTGACATCGGCCCAAAAGAACCCGACAGCTTTCTATCTCTGTGCCAGTAGTATAGATAAGGGGAACATTCAGTACTTCGGCGCC	CASSIDKGNIQYF	4	4.59712e-05	TCRBV19-01	TCRBD01-01*01	TCRBJ02-04*01
GTGACATCGGCCCAAAAGAACCCGACAGCTTTCTATCTCTGTGCCAGTAGTGCAGTTCAGTCCCCAAGCATTCAGTACTTCGGCGCC	CASSAVQSPSIQYF	4	4.59712e-05	TCRBV19-01	TCRBD01-01*01	TCRBJ02-04*01
ACTGTGACATCGGCCCAAAAGAACCCGACAGCTTTCTATCTCTGTGCCAGTAATGAAGGGTTCTATCAGCCCCAGCATTTTGGTGAT	CASNEGFYQPQHF	4	4.59712e-05	TCRBV19-01		TCRBJ01-05*01
GTGACATCGGCCCAAAAGAACCCGACAGCTTTCTATCTCTGTGCCAGTAGTGTGGACAGGGGCCCTTACGAGCAGTACTTCGGGCCG	CASSVDRGPYEQYF	4	4.59712e-05	TCRBV19-01	TCRBD01-01*01	TCRBJ02-07*01
CTGGAGTCTGCCAGGCCCTCACATACCTCTCAGTACCTCTGTGCCAGCAGTGATTTTTCCCCTGGAAACACCATATATTTTGGAGAG	CASSDFSPGNTIYF	4	4.59712e-05	TCRBV25-01*01		TCRBJ01-03*01
ACCCTGGAGTCTGCCAGGCCCTCACATACCTCTCAGTACCTCTGTGCCAGCAGTGATGGTGCCAACTATGGCTACACCTTCGGTTCG	CASSDGANYGYTF	4	4.59712e-05	TCRBV25-01*01		TCRBJ01-02*01
CTGACCCTGGAGTCTGCCAGGCCCTCACATACCTCTCAGTACCTCTGTGCCAGCAGTAAGGGCTCCTACGAGCAGTACTTCGGGCCG	CASSKGSYEQYF	4	4.59712e-05	TCRBV25-01*01		TCRBJ02-07*01
GAGTCTGCCAGGCCCTCACATACCTCTCAGTACCTCTGTGCCAGCAGTGACCGGACTGGCGGGGATGGTGAAGCTTTCTTTGGACAA	CASSDRTGGDGEAFF	4	4.59712e-05	TCRBV25-01*01	TCRBD02-01*01	TCRBJ01-01*01
GAGTCTGCCAGGCCCTCACATACCTCTCAGTACCTCTGTGCCAGCAGTGAACAGGGCGCCAGCTTGGGGGGCTACACCTTCGGTTCG	CASSEQGASLGGYTF	4	4.59712e-05	TCRBV25-01*01	TCRBD01-01*01	TCRBJ01-02*01
GAGTCTGCCAGGCCCTCACATACCTCTCAGTACCTCTGTGCCAGCAGTGAATTTGGGGGGGCAGAAACTGAAGCTTTCTTTGGACAA	CASSEFGGAETEAFF	4	4.59712e-05	TCRBV25-01*01	TCRBD02-01*01	TCRBJ01-01*01
CCCCTGACCCTGGAGTCTGCCAGGCCCTCACATACCTCTCAGTACCTCTGTGCCAGCAAGGGAACGTATGGCTACACCTTCGGTTCG	CASKGTYGYTF	4	4.59712e-05	TCRBV25-01*01		TCRBJ01-02*01
CTGACCCTGGAGTCTGCCAGGCCCTCACATACCTCTCAGTACCTCTGTGCCAGCAGTGAGGGATTCGACGAGCAGTACTTCGGGCCG	CASSEGFDEQYF	4	4.59712e-05	TCRBV25-01*01		TCRBJ02-07*01
CTGGAGTCTGCCAGGCCCTCACATACCTCTCAGTACCTCTGTGCCAGCAGCCGGACAGGGATAAACTATGGCTACACCTTCGGTTCG	CASSRTGINYGYTF	4	4.59712e-05	TCRBV25-01*01	TCRBD01-01*01	TCRBJ01-02*01
TCTGCCAGGCCCTCACATACCTCTCAGTACCTCTGTGCCAGCAGTGAATCCCAGGGGGCCTATAATTCACCCCTCCACTTTGGGAAC	CASSESQGAYNSPLHF	4	4.59712e-05	TCRBV25-01*01	TCRBD01-01*01	TCRBJ01-06*01
CTGAACATGAGCTCCTTGGAGCTGGGGGACTCAGCCCTGTACTTCTGTGCCAGCAGAGGAGGTGGGCCTGAAGCTTTCTTTGGACAA	CASRGGGPEAFF	4	4.59712e-05	TCRBV13-01*01	TCRBD02-01*02	TCRBJ01-01*01
ATGAGCTCCTTGGAGCTGGGGGACTCAGCCCTGTACTTCTGTGCCAGCAGCTTAGGCTCCCGCACAGATACGCAGTATTTTGGCCCA	CASSLGSRTDTQYF	4	4.59712e-05	TCRBV13-01*01	TCRBD02-01	TCRBJ02-03*01
AGCTCCTTGGAGCTGGGGGACTCAGCCCTGTACTTCTGTGCCAGCAGCAGCCGCAACAGGGGGATAGATACGCAGTATTTTGGCCCA	CASSSRNRGIDTQYF	4	4.59712e-05	TCRBV13-01*01	TCRBD01-01*01	TCRBJ02-03*01
ATCCTGTCCTCAGAACCGGGAGACACGGCACTGTATCTCTGCGCCAGCAGTCAATCGGGGGAGGACACTGAAGCTTTCTTTGGACAA	CASSQSGEDTEAFF	4	4.59712e-05	TCRBV23-01*01	TCRBD02-01*02	TCRBJ01-01*01
TCCTCAGAACCGGGAGACACGGCACTGTATCTCTGCGCCAGCAGTCAAGTGGAGCTAATAGACTCCTATGGCTACACCTTCGGTTCG	CASSQVELIDSYGYTF	4	4.59712e-05	TCRBV23-01*01	TCRBD02-01	TCRBJ01-02*01
CTGTCCTCAGAACCGGGAGACACGGCACTGTATCTCTGCGCCAGCAGTCTTTCAGGGGGTATGAATCAGCCCCAGCATTTTGGTGAT	CASSLSGGMNQPQHF	4	4.59712e-05	TCRBV23-01*01	TCRBD01-01*01	TCRBJ01-05*01
ATCAATTCCCTGGAGCTTGGTGACTCTGCTGTGTATTTCTGTGCCAGCAGCCAAGCGCAGGCTAATTCACCCCTCCACTTTGGGAAC	CASSQAQANSPLHF	4	4.59712e-05	TCRBV03	TCRBD01-01*01	TCRBJ01-06*01
CTTCACATCAATTCCCTGGAGCTTGGTGACTCTGCTGTGTATTTCTGTGCCAGCAGCCGGCCACCGGGCGAGCAGTACTTCGGGCCG	CASSRPPGEQYF	4	4.59712e-05	TCRBV03	TCRBD02-01	TCRBJ02-07*01
CACATCAATTCCCTGGAGCTTGGTGACTCTGCTGTGTATTTCTGTGCCAGCAGCCGCCGAGCAAGCTACGAGCAGTACTTCGGGCCG	CASSRRASYEQYF	4	4.59712e-05	TCRBV03	TCRBD02-01	TCRBJ02-07*01
AGTGCCCATCCTGAAGACAGCAGCTTCTACATCTGCAGTGCTAGAGGAGTAGGTGCCAGGCCTAATCAGCCCCAGCATTTTGGTGAT	CSARGVGARPNQPQHF	4	4.59712e-05	TCRBV20	TCRBD01-01*01	TCRBJ01-05*01
CTGGAGCTTGGTGACTCTGCTGTGTATTTCTGTGCCAGCAGGAACACAGGGATAGGATCCTATAATTCACCCCTCCACTTTGGGAAC	CASRNTGIGSYNSPLHF	4	4.59712e-05	TCRBV03	TCRBD01-01*01	TCRBJ01-06*01
ACCAGTGCCCATCCTGAAGACAGCAGCTTCTACATCTGCAGTGCTAGAGATCCGACTAGCCTTTCCTACGAGCAGTACTTCGGGCCG	CSARDPTSLSYEQYF	4	4.59712e-05	TCRBV20	TCRBD02-01	TCRBJ02-07*01
AATTCCCTGGAGCTTGGTGACTCTGCTGTGTATTTCTGTGCCAGCAGCCAGGGGACAGGGAACTACAATGAGCAGTTCTTCGGGCCA	CASSQGTGNYNEQFF	4	4.59712e-05	TCRBV03	TCRBD01-01*01	TCRBJ02-01*01
ATCAATTCCCTGGAGCTTGGTGACTCTGCTGTGTATTTCTGTGCCAGCAGCTCACAGGGTACCAATTCACCCCTCCACTTTGGGAAC	CASSSQGTNSPLHF	4	4.59712e-05	TCRBV03	TCRBD01-01*01	TCRBJ01-06*01
ACAGTGACCAGTGCCCATCCTGAAGACAGCAGCTTCTACATCTGCAGTGCTAGCCAGGGGGCGTTCACTGAAGCTTTCTTTGGACAA	CSASQGAFTEAFF	4	4.59712e-05	TCRBV20	TCRBD01-01*01	TCRBJ01-01*01
TCGGCTGCTCCCTCCCAGACATCTGTGTACTTCTGTGCCAGCAGTCCAATCCTTGGGACAGGGGAAGAGACCCAGTACTTCGGGCCA	CASSPILGTGEETQYF	4	4.59712e-05	TCRBV06	TCRBD01-01*01	TCRBJ02-05*01
ACCAGTGCCCATCCTGAAGACAGCAGCTTCTACATCTGCAGTGCGGAGCCCGCCACGGGAAGCTCCTACGAGCAGTACTTCGGGCCG	CSAEPATGSSYEQYF	4	4.59712e-05	TCRBV20	TCRBD02-01*02	TCRBJ02-07*01
GTGACCAGTGCCCATCCTGAAGACAGCAGCTTCTACATCTGCAGTGCTAGAGAGCCAGAGATGAACACTGAAGCTTTCTTTGGACAA	CSAREPEMNTEAFF	4	4.59712e-05	TCRBV20		TCRBJ01-01*01
GCTGCTCCCTCCCAGACATCTGTGTACTTCTGTGCCAGCAGTTACTCGGACAGGGGGCGCGGTAATCAGCCCCAGCATTTTGGTGAT	CASSYSDRGRGNQPQHF	4	4.59712e-05	TCRBV06	TCRBD01-01*01	TCRBJ01-05*01
GTGACCAGTGCCCATCCTGAAGACAGCAGCTTCTACATCTGCAGTGCTAGAGTGGAGGTTGGGGACTATGGCTACACCTTCGGTTCG	CSARVEVGDYGYTF	4	4.59712e-05	TCRBV20	TCRBD02-01*02	TCRBJ01-02*01
ATCAATTCCCTGGAGCTTGGTGACTCTGCTGTGTATTTCTGTGCCAGCAGCCCCCACGGTGGGGCGCGGTTAGCTTTCTTTGGACAA	CASSPHGGARLAFF	4	4.59712e-05	TCRBV03	TCRBD01-01*01	TCRBJ01-01*01
CTGGAGCTTGGTGACTCTGCTGTGTATTTCTGTGCCAGCAGCCAAGAGGGACTAGCGTATCCCTACAATGAGCAGTTCTTCGGGCCA	CASSQEGLAYPYNEQFF	4	4.59712e-05	TCRBV03	TCRBD02-01	TCRBJ02-01*01
AATTCCCTGGAGCTTGGTGACTCTGCTGTGTATTTCTGTGCCAGCAGCCCTACAGTGACTAGCACAGATACGCAGTATTTTGGCCCA	CASSPTVTSTDTQYF	4	4.59712e-05	TCRBV03		TCRBJ02-03*01
AATCTTCACATCAATTCCCTGGAGCTTGGTGACTCTGCTGTGTATTTCTGTGCCAGCAGCGATACAGGGGAGGCTTTCTTTGGACAA	CASSDTGEAFF	4	4.59712e-05	TCRBV03	TCRBD01-01*01	TCRBJ01-01*01
ACCAGTGCCCATCCTGAAGACAGCAGCTTCTACATCTGCAGTGCTAGACCACTGGCGGGGGGGCGAGAGACCCAGTACTTCGGGCCA	CSARPLAGGRETQYF	4	4.59712e-05	TCRBV20	TCRBD02-01*01	TCRBJ02-05*01
ACAGTGACCAGTGCCCATCCTGAAGACAGCAGCTTCTACATCTGCAGTGCTAGAGTCAACAGGAACACTGAAGCTTTCTTTGGACAA	CSARVNRNTEAFF	4	4.59712e-05	TCRBV20	TCRBD01-01*01	TCRBJ01-01*01
TTGGAGTCGGCTGCTCCCTCCCAAACATCTGTGTACTTCTGTGCCAGCTTGAATGCAGGGCCGAAAGAGACCCAGTACTTCGGGCCA	CASLNAGPKETQYF	4	4.59712e-05	TCRBV06	TCRBD01-01*01	TCRBJ02-05*01
CACATCAATTCCCTGGAGCTTGGTGACTCTGCTGTGTATTTCTGTGCCAGCAGCCGTACTCTCAGCTACGAGCAGTACTTCGGGCCG	CASSRTLSYEQYF	4	4.59712e-05	TCRBV03		TCRBJ02-07*01
TTGGAGTCGGCTGCTCCCTCCCAAACATCTGTGTACTTCTGTGCCAGCAGTTATGGGGGGAACACCGGGGAGCTGTTTTTTGGAGAA	CASSYGGNTGELFF	4	4.59712e-05	TCRBV06		TCRBJ02-02*01
GCCCATCCTGAAGACAGCAGCTTCTACATCTGCAGTGCTAGATCGGATCAGGGAAGCTCCTATAATTCACCCCTCCACTTTGGGAAC	CSARSDQGSSYNSPLHF	4	4.59712e-05	TCRBV20	TCRBD01-01*01	TCRBJ01-06*01
CCCTCAGAACCCAGGGACTCAGCTGTGTACTTCTGTGCCAGCACTCAACAGGGGGCGGGTGGGGCCAACGTCCTGACTTTCGGGGCC	CASTQQGAGGANVLTF	4	4.59712e-05	TCRBV12	TCRBD01-01*01	TCRBJ02-06*01
GTGACCAGTGCCCATCCTGAAGACAGCAGCTTCTACATCTGCAGTGCTAAGGGGGCTAGTCGGAACACTGAAGCTTTCTTTGGACAA	CSAKGASRNTEAFF	4	4.59712e-05	TCRBV20	TCRBD01-01*01	TCRBJ01-01*01
CTGACAGTGACCAGTGCCCATCCTGAAGACAGCAGCTTCTACATCTGCAGTGCTCAGACAGGAAATCAGCCCCAGCATTTTGGTGAT	CSAQTGNQPQHF	4	4.59712e-05	TCRBV20	TCRBD01-01*01	TCRBJ01-05*01
GACTCTGCTGTGTATTTCTGTGCCAGCAGCCAAGATCGTAAGGGATTAGCGGGAGAAACAGATCAAGAGACCCAGTACTTCGGGCCA	CASSQDRKGLAGETDQETQYF	4	4.59712e-05	TCRBV03	TCRBD02-01*02	TCRBJ02-05*01
ACAGTGACCAGTGCCCATCCTGAAGACAGCAGCTTCTACATCTGCAGTGCTAGTCAGGGATACAATCAGCCCCAGCATTTTGGTGAT	CSASQGYNQPQHF	4	4.59712e-05	TCRBV20	TCRBD01-01*01	TCRBJ01-05*01
AGTGCCCATCCTGAAGACAGCAGCTTCTACATCTGCAGTGCTAGAGATAAGCCGACAGGCGGAGGAAACACCATATATTTTGGAGAG	CSARDKPTGGGNTIYF	4	4.59712e-05	TCRBV20	TCRBD01-01*01	TCRBJ01-03*01
GAGTCGGCTGCTCCCTCCCAAACATCTGTGTACTTCTGTGCCAGCACCTACGGGCGGGAAGCTAACTATGGCTACACCTTCGGTTCG	CASTYGREANYGYTF	4	4.59712e-05	TCRBV06	TCRBD02-01*02	TCRBJ01-02*01
AATTCCCTGGAGCTTGGTGACTCTGCTGTGTATTTCTGTGCCAGCAGTCAGACTAGCGGGGGCTTCGATACGCAGTATTTTGGCCCA	CASSQTSGGFDTQYF	4	4.59712e-05	TCRBV03	TCRBD02-01*01	TCRBJ02-03*01
CACATCAATTCCCTGGAGCTTGGTGACTCTGCTGTGTATTTCTGTGCCAGCAGCCAAGGACCCACCGGGGAGCTGTTTTTTGGAGAA	CASSQGPTGELFF	4	4.59712e-05	TCRBV03		TCRBJ02-02*01
CATCCTGAAGACAGCAGCTTCTACATCTGCAGTGCTAGAGTTCTTCTACCGGACAGGGGAAGAGACACTGAAGCTTTCTTTGGACAA	CSARVLLPDRGRDTEAFF	4	4.59712e-05	TCRBV20	TCRBD01-01*01	TCRBJ01-01*01
GTGACCAGTGCCCATCCTGAAGACAGCAGCTTCTACATCTGCAGTGCTAGAGATAAGGGACAGGGGGCGAATCCGTACTTCGGGCCG	CSARDKGQGANPYF	4	4.59712e-05	TCRBV20	TCRBD01-01*01	TCRBJ02-07*01
CCCTCAGAACCCAGGGACTCAGCTGTGTACTTCTGTGCCAGCAGTGCTGGGACTAGCGGGGGGGGAGAGACCCAGTACTTCGGGCCA	CASSAGTSGGGETQYF	4	4.59712e-05	TCRBV12	TCRBD02-01*01	TCRBJ02-05*01
AATTCCCTGGAGCTTGGTGACTCTGCTGTGTATTTCTGTGCCAGCAGATCCAACGGGGGGCGCGCGGAGACCCAGTACTTCGGGCCA	CASRSNGGRAETQYF	4	4.59712e-05	TCRBV03	TCRBD02-01*01	TCRBJ02-05*01
CCCTCAGAACCCAGGGACTCAGCTGTGTACTTCTGTGCCAGCAGTTCCATAGCGGGGGCCAGCACAGATACGCAGTATTTTGGCCCA	CASSSIAGASTDTQYF	4	4.59712e-05	TCRBV12	TCRBD02-01*01	TCRBJ02-03*01
CTTGGTGACTCTGCTGTGTATTTCTGTGCCAGCAGCCAGGCCTTAGGGATAGCGGGGGCCCGCACAGATACGCAGTATTTTGGCCCA	CASSQALGIAGARTDTQYF	4	4.59712e-05	TCRBV03	TCRBD02-01*01	TCRBJ02-03*01
TTGGAGTCGGCTGCTCCCTCCCAAACATCTGTGTACTTCTGTGCCAGCAAAGATCGACAGTTCACAGATACGCAGTATTTTGGCCCA	CASKDRQFTDTQYF	4	4.59712e-05	TCRBV06	TCRBD01-01*01	TCRBJ02-03*01
GCTCCCTCCCAAACATCTGTGTACTTCTGTGCCAGCAGTTTTTTCGGTCGAGGGGGCCCCAGCACAGATACGCAGTATTTTGGCCCA	CASSFFGRGGPSTDTQYF	4	4.59712e-05	TCRBV06	TCRBD01-01*01	TCRBJ02-03*01
CCCTCCCAAACATCTGTGTACTTCTGTGCCAGCAGTACCCCTTTTCGCGGCGCCAGGGTGGGAAACAATGAGCAGTTCTTCGGGCCA	CASSTPFRGARVGNNEQFF	4	4.59712e-05	TCRBV06	TCRBD01-01*01	TCRBJ02-01*01
GTGACCAGTGCCCATCCTGAAGACAGCAGCTTCTACATCTGCAGCCAGACTAGCGGGGGGGCGGAAGAGACCCAGTACTTCGGGCCA	CSQTSGGAEETQYF	4	4.59712e-05	TCRBV20	TCRBD02-01*01	TCRBJ02-05*01
TCCCTGGAGCTTGGTGACTCTGCTGTGTATTTCTGTGCCAGCAGCCCCATAGCGGGGGGGAGCACAGATACGCAGTATTTTGGCCCA	CASSPIAGGSTDTQYF	4	4.59712e-05	TCRBV03	TCRBD02-01*01	TCRBJ02-03*01
ACCAGTGCCCATCCTGAAGACAGCAGCTTCTACATCTGCAGTGCTAGAGATTCAATCAGCGGGGGGGTCGAGCAGTTCTTCGGGCCA	CSARDSISGGVEQFF	4	4.59712e-05	TCRBV20	TCRBD02-01*01	TCRBJ02-01*01
ATCAATTCCCTGGAGCTTGGTGACTCTGCTGTGTATTTCTGTGCCAGCACCGCTTTGGGCTCCCACTCCCGGCTGTTTTTTGGCAGT	CASTALGSHSRLFF	4	4.59712e-05	TCRBV03	TCRBD01-01*01	TCRBJ01-04*01
GACTCGGCCGTGTATCTCTGTGCCAGCAGCTCAAAAGAGACAGCCTTGACTAGGCGATCCAAGAACACTGAAGCTTTCTTTGGACAA	CASSSKETALTRRSKNTEAFF	4	4.59712e-05		TCRBD02-01	TCRBJ01-01*01
GTGACCAGTGCCCATCCTGAAGACAGCAGCTTCTACATCTGCAGTGCTAGAGTTTCTGGGGGCTTGTACGAGCAGTACTTCGGGCCG	CSARVSGGLYEQYF	4	4.59712e-05	TCRBV20	TCRBD01-01*01	TCRBJ02-07*01
GTGACCAGTGCCCATCCTGAAGACAGCAGCTTCTACATCTGCAGTGCTAGACTAGCGGGGGGAACCTACGAGCAGTACTTCGGGCCG	CSARLAGGTYEQYF	4	4.59712e-05	TCRBV20	TCRBD02-01*01	TCRBJ02-07*01
CAGCCCTCAGAACCCAGGGACTCAGCTGTGTACTTCTGTGCCAGCACCTTCGGCGGGGGGTACACAGATACGCAGTATTTTGGCCCA	CASTFGGGYTDTQYF	4	4.59712e-05	TCRBV12	TCRBD02-01*01	TCRBJ02-03*01
ATCAATTCCCTGGAGCTTGGTGACTCTGCTGTGTATTTCTGTGCCAGCAGCCAAGATACTGGAGGCTATGGCTACACCTTCGGTTCG	CASSQDTGGYGYTF	4	4.59712e-05	TCRBV03	TCRBD02-01*02	TCRBJ01-02*01
GTGACCAGTGCCCATCCTGAAGACAGCAGCTTCTACATCTGCAGTGCTAGAAGCAGCAGTTTGAACACTGAAGCTTTCTTTGGACAA	CSARSSSLNTEAFF	4	4.59712e-05	TCRBV20		TCRBJ01-01*01
AATTCCCTGGAGCTTGGTGACTCTGCTGTGTATTTCTGTGCCAGCAGCGGGTGGACAGGGTTGGCTTCACCCCTCCACTTTGGGAAC	CASSGWTGLASPLHF	4	4.59712e-05	TCRBV03	TCRBD01-01*01	TCRBJ01-06*01
CACATCAATTCCCTGGAGCTTGGTGACTCTGCTGTGTATTTCTGTGCCAGCAGCCAAGGGGAGACCTATGGCTACACCTTCGGTTCG	CASSQGETYGYTF	4	4.59712e-05	TCRBV03	TCRBD02-01*02	TCRBJ01-02*01
CAGCCCTCAGAACCCAGGGACTCAGCTGTGTACTTCTGTGCCAGCAGTTTGGACAGGGGGACCACCGGGGAGCTGTTTTTTGGAGAA	CASSLDRGTTGELFF	4	4.59712e-05	TCRBV12	TCRBD01-01*01	TCRBJ02-02*01
ATCCAGCCCTCAGAACCCAGGGACTCAGCTGTGTACTTCTGTGCCAGCAGGCGGGGGGATCCCTACAATGAGCAGTTCTTCGGGCCA	CASRRGDPYNEQFF	4	4.59712e-05	TCRBV12	TCRBD02-01*01	TCRBJ02-01*01
ATCCAGCCCTCAGAACCCAGGGACTCAGCTGTGTACTTCTGTGCCAGCAGTTTGTCAGGGGGCACCGGGGAGCTGTTTTTTGGAGAA	CASSLSGGTGELFF	4	4.59712e-05	TCRBV12	TCRBD01-01*01	TCRBJ02-02*01
CACATCAATTCCCTGGAGCTTGGTGACTCTGCTGTGTATTTCTGTGCCAGCAGCCAGGGCTCTGGAAACACCATATATTTTGGAGAG	CASSQGSGNTIYF	4	4.59712e-05	TCRBV03		TCRBJ01-03*01
CTGAAGATCCAGCCCTCAGAACCCAGGGACTCAGCTGTGTACTTCTGTGCCAGCAGTACAGGTTTCAATGAGCAGTTCTTCGGGCCA	CASSTGFNEQFF	4	4.59712e-05	TCRBV12	TCRBD01-01*01	TCRBJ02-01*01
TTGGAGTCGGCTGCTCCCTCCCAAACATCTGTGTACTTCTGTGCCAGCAGTCCTCCGGGACAGGGAAGCGAGCAGTACTTCGGGCCG	CASSPPGQGSEQYF	4	4.59712e-05	TCRBV06	TCRBD01-01*01	TCRBJ02-07*01
CCCTCAGAACCCAGGGACTCAGCTGTGTACTTCTGTGCCAGCAGTTTACCCATCCGGGACAGGGCGAACGAGCAGTACTTCGGGCCG	CASSLPIRDRANEQYF	4	4.59712e-05	TCRBV12	TCRBD01-01*01	TCRBJ02-07*01
CTGACAGTGACCAGTGCCCATCCTGAAGACAGCAGCTTCTACATCTGCAGTGCTAGAGATGGGGGCGGAGCCCAGCATTTTGGTGAT	CSARDGGGAQHF	4	4.59712e-05	TCRBV20	TCRBD01-01*01	TCRBJ01-05*01
TCGGCTGCTCCCTCCCAGACATCTGTGTACTTCTGTGCCAGCTCAAACCCGGGGGGACAGTTGAGCGGGGAGCTGTTTTTTGGAGAA	CASSNPGGQLSGELFF	4	4.59712e-05	TCRBV06		TCRBJ02-02*01
GCTCCCTCCCAAACATCTGTGTACTTCTGTGCCAGCAGGCCCCGATGGACAGGGGGCGAAATCAATCAGCCCCAGCATTTTGGTGAT	CASRPRWTGGEINQPQHF	4	4.59712e-05	TCRBV06	TCRBD01-01*01	TCRBJ01-05*01
ACAGTGACCAGTGCCCATCCTGAAGACAGCAGCTTCTACATCTGCAGTGCTAGGACTGAGAGCAATCAGCCCCAGCATTTTGGTGAT	CSARTESNQPQHF	4	4.59712e-05	TCRBV20	TCRBD02-01	TCRBJ01-05*01
ATCCAGCCCTCAGAACCCAGGGACTCAGCTGTGTACTTCTGTGCCAGCACTCGGGGGGGGAATAAGTCACCCCTCCACTTTGGGAAC	CASTRGGNKSPLHF	4	4.59712e-05	TCRBV12	TCRBD02-01*01	TCRBJ01-06*01
CAGCCCTCAGAACCCAGGGACTCAGCTGTGTACTTCTGTGCCAGCAGCCCTCCCCCAGAGACGCGCTATGGCTACACCTTCGGTTCG	CASSPPPETRYGYTF	4	4.59712e-05	TCRBV12		TCRBJ01-02*01
CTGAAGATCCAGCCCTCAGAACCCAGGGACTCAGCTGTGTACTTCTGTGCCAGCACCTTGGGACCGACTGAAGCTTTCTTTGGACAA	CASTLGPTEAFF	4	4.59712e-05	TCRBV12		TCRBJ01-01*01
ACAGTGACCAGTGCCCATCCTGAAGACAGCAGCTTCTACATCTGCAGTGTCTATGACAGGGGGGCCACTGAAGCTTTCTTTGGACAA	CSVYDRGATEAFF	4	4.59712e-05	TCRBV20	TCRBD01-01*01	TCRBJ01-01*01
ACCAGTGCCCATCCTGAAGACAGCAGCTTCTACATCTGCAGTGCTAGCCCCGGGGCAGGGAGGAAAAATGAGCAGTTCTTCGGGCCA	CSASPGAGRKNEQFF	4	4.59712e-05	TCRBV20	TCRBD02-01*02	TCRBJ02-01*01
ACCAGTGCCCATCCTGAAGACAGCAGCTTCTACATCTGCAGTGCTAGAGATCGTGGGGGGGGCAAGGAGACCCAGTACTTCGGGCCA	CSARDRGGGKETQYF	4	4.59712e-05	TCRBV20	TCRBD02-01*01	TCRBJ02-05*01
CCCTCCCAAACATCTGTGTACTTCTGTGCCAGCAGTCCACTCTCCTCGGGACTAGCGGGGGGGCGGGAGACCCAGTACTTCGGGCCA	CASSPLSSGLAGGRETQYF	4	4.59712e-05	TCRBV06	TCRBD02-01*01	TCRBJ02-05*01
ACTCTGAAGATCCAGCCCTCAGAACCCAGGGACTCAGCTGTGTACTTCTGTGCCAGCAGTTTCGGGGAGGGGCAGTTCTTCGGGCCA	CASSFGEGQFF	4	4.59712e-05	TCRBV12	TCRBD02-01*02	TCRBJ02-01*01
GCCCATCCTGAAGACAGCAGCTTCTACATCTGCAGTGCTACCCCCGGGGGCGCTGCTGGAAGAAGCTATGGCTACACCTTCGGTTCG	CSATPGGAAGRSYGYTF	4	4.59712e-05	TCRBV20		TCRBJ01-02*01
CTTGGTGACTCTGCTGTGTATTTCTGTGCCAGCAGTTCGATCGGGACTAGCCGGGATGGAGGATGGGAGACCCAGTACTTCGGGCCA	CASSSIGTSRDGGWETQYF	4	4.59712e-05	TCRBV03	TCRBD02-01	TCRBJ02-05*01
AGTGCCCATCCTGAAGACAGCAGCTTCTACATCTGCAGTGCTCAGGCTAGCGGGGGGGCAATTTACAATGAGCAGTTCTTCGGGCCA	CSAQASGGAIYNEQFF	4	4.59712e-05	TCRBV20	TCRBD02-01*01	TCRBJ02-01*01
TCCCTGGAGCTTGGTGACTCTGCTGTGTATTTCTGTGCCAGCAGCCGCAAATTGACGGGGAGGGCTGAAAAACTGTTTTTTGGCAGT	CASSRKLTGRAEKLFF	4	4.59712e-05	TCRBV03	TCRBD02-01*02	TCRBJ01-04*01
ACCAGTGCCCATCCTGAAGACAGCAGCTTCTACATCTGCAGTGCTAGAGCTCCGCGGGATGGTGGCGATACGCAGTATTTTGGCCCA	CSARAPRDGGDTQYF	4	4.59712e-05	TCRBV20	TCRBD02-01*02	TCRBJ02-03*01
GTGACCAGTGCCCATCCTGAAGACAGCAGCTTCTACATCTGCAGTGCTAGACTCGACAGGGGTCCGAATGAGCAGTTCTTCGGGCCA	CSARLDRGPNEQFF	4	4.59712e-05	TCRBV20	TCRBD01-01*01	TCRBJ02-01*01
GTGACCAGTGCCCATCCTGAAGACAGCAGCTTCTACATCTGCAGTGCTAGAGGGGGACAGGAGAACAATGAGCAGTTCTTCGGGCCA	CSARGGQENNEQFF	4	4.59712e-05	TCRBV20	TCRBD01-01*01	TCRBJ02-01*01
GAGTCGGCTGCTCCCTCCCAAACATCTGTGTACTTCTGTGCCAGCAGTTACGGGGACAGCGGGGGAGATACGCAGTATTTTGGCCCA	CASSYGDSGGDTQYF	4	4.59712e-05	TCRBV06	TCRBD02-01*01	TCRBJ02-03*01
ACAGTGACCAGTGCCCATCCTGAAGACAGCAGCTTCTACATCTGCAGTGCTAGCGGGGACCCGGACTCCGAGCAGTACTTCGGGCCG	CSASGDPDSEQYF	4	4.59712e-05	TCRBV20		TCRBJ02-07*01
ATCAATTCCCTGGAGCTTGGTGACTCTGCTGTGTATTTCTGTGCCAGCAGCCAAGATAGCTCTGGAAACACCATATATTTTGGAGAG	CASSQDSSGNTIYF	4	4.59712e-05	TCRBV03	TCRBD02-01	TCRBJ01-03*01
GCTCCCTCCCAGACATCTGTGTACTTCTGTGCCAGCAGTTACTCGCAGAGGGCCTTCTATAGCAATCAGCCCCAGCATTTTGGTGAT	CASSYSQRAFYSNQPQHF	4	4.59712e-05	TCRBV06	TCRBD02-01*02	TCRBJ01-05*01
TTGGAGTCGGCTGCTCCCTCCCAAACATCTGTGTACTTCTGTGCCAGCGGAACAGGAAGATACACAGATACGCAGTATTTTGGCCCA	CASGTGRYTDTQYF	4	4.59712e-05	TCRBV06	TCRBD01-01*01	TCRBJ02-03*01
TCAGAACCCAGGGACTCAGCTGTGTACTTCTGTGCCAGCAGTTTTCACAGGGGAGGAGGGAACACCGGGGAGCTGTTTTTTGGAGAA	CASSFHRGGGNTGELFF	4	4.59712e-05	TCRBV12	TCRBD01-01*01	TCRBJ02-02*01
GAGTCTGCCATCCCCAACCAGACAGCTCTTTACTTCTGTGCCACCAGTGACCCCGGGACTGGCACAGATACGCAGTATTTTGGCCCA	CATSDPGTGTDTQYF	4	4.59712e-05	TCRBV24	TCRBD02-01	TCRBJ02-03*01
GTGACCAGTGCCCATCCTGAAGACAGCAGCTTCTACATCTGCAGTGCTAGAGATAGGCCAGGGGTAGAAAAACTGTTTTTTGGCAGT	CSARDRPGVEKLFF	4	4.59712e-05	TCRBV20	TCRBD01-01*01	TCRBJ01-04*01
ATCCAGCCCTCAGAACCCAGGGACTCAGCTGTGTACTTCTGTGCCAGCAATATCCGGGGGGGCGGCGGGGAGCTGTTTTTTGGAGAA	CASNIRGGGGELFF	4	4.59712e-05	TCRBV12	TCRBD02-01*01	TCRBJ02-02*01
ACCAGTGCCCATCCTGAAGACAGCAGCTTCTACATCTGCAGTGCTACTCCCATAGCGGGGAAGCAAGAGACCCAGTACTTCGGGCCA	CSATPIAGKQETQYF	4	4.59712e-05	TCRBV20	TCRBD02-01*01	TCRBJ02-05*01
TCGGCTGCTCCCTCCCAGACATCTGTGTACTTCTGTGCCAGCAGCCCCCGTCCCGGGGGGGCCTACAATGAGCAGTTCTTCGGGCCA	CASSPRPGGAYNEQFF	4	4.59712e-05	TCRBV06	TCRBD02-01*01	TCRBJ02-01*01
GCCCATCCTGAAGACAGCAGCTTCTACATCTGCAGTGCTAGTAGGACTCGGGGGGGTAGGTCCTACAATGAGCAGTTCTTCGGGCCA	CSASRTRGGRSYNEQFF	4	4.59712e-05	TCRBV20	TCRBD02-01*01	TCRBJ02-01*01
GCTGCTCCCTCCCAAACATCTGTGTACTTCTGTGCCAGCAGTTACCGGATAGCGGGGGGGGGCCAAGAGACCCAGTACTTCGGGCCA	CASSYRIAGGGQETQYF	4	4.59712e-05	TCRBV06	TCRBD02-01*01	TCRBJ02-05*01
GAGTCGGCTGCTCCCTCCCAAACATCTGTGTACTTCTGTGCCAGCAGTTTGGGGCCGGGGCCCACCGGGGAGCTGTTTTTTGGAGAA	CASSLGPGPTGELFF	4	4.59712e-05	TCRBV06		TCRBJ02-02*01
TCCCTGGAGCTTGGTGACTCTGCTGTGTATTTCTGTGCCAGCAGCCATTGGGACAGGAGTACTGGAAACACCATATATTTTGGAGAG	CASSHWDRSTGNTIYF	4	4.59712e-05	TCRBV03	TCRBD01-01*01	TCRBJ01-03*01
CTAGAGTCTGCCATCCCCAACCAGACAGCTCTTTACTTCTGTGCCACCAGTGCGGGGGCGGGGTCCGGGGAGCTGTTTTTTGGAGAA	CATSAGAGSGELFF	4	4.59712e-05	TCRBV24		TCRBJ02-02*01
CAGCCCTCAGAACCCAGGGACTCAGCTGTGTACTTCTGTGCCAGCAGGACGACAGGGGGTAGTGGAAACACCATATATTTTGGAGAG	CASRTTGGSGNTIYF	4	4.59712e-05	TCRBV12	TCRBD01-01*01	TCRBJ01-03*01
TCCCTGGAGCTTGGTGACTCTGCTGTGTATTTCTGTGCCAGCAGCCCTCAACTAGCGGGGGGAACAGATACGCAGTATTTTGGCCCA	CASSPQLAGGTDTQYF	4	4.59712e-05	TCRBV03	TCRBD02-01*01	TCRBJ02-03*01
CTGACAGTGACCAGTGCCCATCCTGAAGACAGCAGCTTCTACATCTGCAGTGCCCCCAGGGGGCGCAGAGGCTACACCTTCGGTTCG	CSAPRGRRGYTF	4	4.59712e-05	TCRBV20	TCRBD01-01*01	TCRBJ01-02*01
TCGGCTGCTCCCTCCCAAACATCTGTGTACTTCTGTGCCAGCAGTTACATGGCGGGGGGGCGCACCGGGGAGCTGTTTTTTGGAGAA	CASSYMAGGRTGELFF	4	4.59712e-05	TCRBV06	TCRBD02-01*01	TCRBJ02-02*01
TCAGAACCCAGGGACTCAGCTGTGTACTTCTGTGCCAGCGCTGGGACTAGCGGGGGGGCCGATATCAATGAGCAGTTCTTCGGGCCA	CASAGTSGGADINEQFF	4	4.59712e-05	TCRBV12	TCRBD02-01*01	TCRBJ02-01*01
ACAGTGACCAGTGCCCATCCTGAAGACAGCAGCTTCTACATCTGCAGTGCTAGAGGAGGGGGCGAGGTCGAGCAGTACTTCGGGCCG	CSARGGGEVEQYF	4	4.59712e-05	TCRBV20	TCRBD01-01*01	TCRBJ02-07*01
ATCAATTCCCTGGAGCTTGGTGACTCTGCTGTGTATTTCTGTGCCAGCAGCCAAGAGGGGGCGAGGACTGAAGCTTTCTTTGGACAA	CASSQEGARTEAFF	4	4.59712e-05	TCRBV03	TCRBD01-01*01	TCRBJ01-01*01
TCGGCTGCTCCCTCCCAAACATCTGTGTACTTCTGTGCCAGCAGTACCCTAGCGGGGACGGGCACCGGGGAGCTGTTTTTTGGAGAA	CASSTLAGTGTGELFF	4	4.59712e-05	TCRBV06	TCRBD02-01*01	TCRBJ02-02*01
TCGGCTGCTCCCTCCCAAACATCTGTGTACTTCTGTGCCAGCAGCCCCCTGGGTGGCGGGGGGGCAGATACGCAGTATTTTGGCCCA	CASSPLGGGGADTQYF	4	4.59712e-05	TCRBV06	TCRBD02-01*01	TCRBJ02-03*01
AAGATCCAGCCCTCAGAACCCAGGGACTCAGCTGTGTACTTCTGTGCCAGCAGTACTGGGACTAGGTACGAGCAGTACTTCGGGCCG	CASSTGTRYEQYF	4	4.59712e-05	TCRBV12	TCRBD02-01	TCRBJ02-07*01
ACTCTGAAGATCCAGCCCTCAGAACCCAGGGACTCAGCTGTGTACTTCTGTGCCAGCACCCAGACCGGGGAGCTGTTTTTTGGAGAA	CASTQTGELFF	4	4.59712e-05	TCRBV12	TCRBD01-01*01	TCRBJ02-02*01
CATCCTGAAGACAGCAGCTTCTACATCTGCAGTGCTACGCCCCTAGCGGGGGCCGGTTTGGGGGTTTACGAGCAGTACTTCGGGCCG	CSATPLAGAGLGVYEQYF	4	4.59712e-05	TCRBV20	TCRBD02-01*01	TCRBJ02-07*01
TCCCTAGAGTCTGCCATCCCCAACCAGACAGCTCTTTACTTCTGTGCCACCAGTGCCGGCAGTAACTATGGCTACACCTTCGGTTCG	CATSAGSNYGYTF	4	4.59712e-05	TCRBV24		TCRBJ01-02*01
CACATCAATTCCCTGGAGCTTGGTGACTCTGCTGTGTATTTCTGTGCCAGCAGCCAAGTGGGGAACACTGAAGCTTTCTTTGGACAA	CASSQVGNTEAFF	4	4.59712e-05	TCRBV03		TCRBJ01-01*01
CACATCAATTCCCTGGAGCTTGGTGACTCTGCTGTGTATTTCTGTGCCAGCTCACCGGGTCCTTCGGATGAGCAGTTCTTCGGGCCA	CASSPGPSDEQFF	4	4.59712e-05	TCRBV03	TCRBD02-01	TCRBJ02-01*01
TCCCTGGAGCTTGGTGACTCTGCTGTGTATTTCTGTGCCAGCAGCCATCCGGGACTAGCGAGGGAAGAGACCCAGTACTTCGGGCCA	CASSHPGLAREETQYF	4	4.59712e-05	TCRBV03	TCRBD02-01	TCRBJ02-05*01
AGTGCCCATCCTGAAGACAGCAGCTTCTACATCTGCAGTGCTAGAGAGTATAAGGGGGGGTTGAACTATGGCTACACCTTCGGTTCG	CSAREYKGGLNYGYTF	4	4.59712e-05	TCRBV20	TCRBD02-01*01	TCRBJ01-02*01
CCCTCAGAACCCAGGGACTCAGCTGTGTACTTCTGTGCCAGCAGCTCCGAGGGAGGGATTCCGAGCACTGAAGCTTTCTTTGGACAA	CASSSEGGIPSTEAFF	4	4.59712e-05	TCRBV12	TCRBD02-01*02	TCRBJ01-01*01
ACCAGTGCCCATCCTGAAGACAGCAGCTTCTACATCTGCAGTGCTAGAACCCTAGCGGGGGGGCGTGAGACCCAGTACTTCGGGCCA	CSARTLAGGRETQYF	4	4.59712e-05	TCRBV20	TCRBD02-01*01	TCRBJ02-05*01
CTGACAGTGACCAGTGCCCATCCTGAAGACAGCAGCTTCTACATCTGCAGTGCTCCTGGGCCATCCTACGAGCAGTACTTCGGGCCG	CSAPGPSYEQYF	4	4.59712e-05	TCRBV20	TCRBD01-01*01	TCRBJ02-07*01
TTGGAGTCGGCTGCTCCCTCCCAAACATCTGTGTACTTCTGTGCCAGTGACAGGCCGCCACCTGGAAACACCATATATTTTGGAGAG	CASDRPPPGNTIYF	4	4.59712e-05	TCRBV06	TCRBD01-01*01	TCRBJ01-03*01
AGTGCCCATCCTGAAGACAGCAGCTTCTACATCTGCAGTGCCACGGACAGGACTCTCCCCTCTGGAAACACCATATATTTTGGAGAG	CSATDRTLPSGNTIYF	4	4.59712e-05	TCRBV20	TCRBD01-01*01	TCRBJ01-03*01
CTGACAGTGACCAGTGCCCATCCTGAAGACAGCAGCTTCTACATCTGCAGTGCTAGACCAGACCCCTACGAGCAGTACTTCGGGCCG	CSARPDPYEQYF	4	4.59712e-05	TCRBV20		TCRBJ02-07*01
TTGGAGTCGGCTGCTCCCTCCCAAACATCTGTGTACTTCTGTGCCAGCAGTCGGACAGGGACTAATGAAAAACTGTTTTTTGGCAGT	CASSRTGTNEKLFF	4	4.59712e-05	TCRBV06	TCRBD01-01*01	TCRBJ01-04*01
GAGTCGGCTGCTCCCTCCCAAACATCTGTGTACTTCTGTGCCAGCACCCGCACAGGAGGGGCGACCCACGAGCAGTACTTCGGGCCG	CASTRTGGATHEQYF	4	4.59712e-05	TCRBV06	TCRBD02-01*02	TCRBJ02-07*01
GTGACCAGTGCCCATCCTGAAGACAGCAGCTTCTACATCTGCAGTGCTAGGGACCCCAGGGGTGGAAACACCATATATTTTGGAGAG	CSARDPRGGNTIYF	4	4.59712e-05	TCRBV20	TCRBD01-01*01	TCRBJ01-03*01
TCAGAACCCAGGGACTCAGCTGTGTACTTCTGTGCCAGCAGGGCCGGGACATCGAAGTCGCCTAACTATGGCTACACCTTCGGTTCG	CASRAGTSKSPNYGYTF	4	4.59712e-05	TCRBV12	TCRBD01-01*01	TCRBJ01-02*01
ACAGTGACCAGTGCCCATCCTGAAGACAGCAGCTTCTACATCTGCAGTGCTAGCGGCCTGACTAGAGAGACCCAGTACTTCGGGCCA	CSASGLTRETQYF	4	4.59712e-05	TCRBV20	TCRBD02-01	TCRBJ02-05*01
ATCCAGCCCTCAGAACCCAGGGACTCAGCTGTGTACTTCTGTGCCAGCAGTCAACCAGTAAGCCGCAATGAGCAGTTCTTCGGGCCA	CASSQPVSRNEQFF	4	4.59712e-05	TCRBV12		TCRBJ02-01*01
CCCTCAGAACCCAGGGACTCAGCTGTGTACTTCTGTGCCAGCAGTGCCTACAGGGGGGCGCGGACAGATACGCAGTATTTTGGCCCA	CASSAYRGARTDTQYF	4	4.59712e-05	TCRBV12	TCRBD01-01*01	TCRBJ02-03*01
TCAGAACCCAGGGACTCAGCTGTGTACTTCTGTGCCAGCAGCTTCGGACAGGGAGATGTGAGCAATCAGCCCCAGCATTTTGGTGAT	CASSFGQGDVSNQPQHF	4	4.59712e-05	TCRBV12	TCRBD01-01*01	TCRBJ01-05*01
CTTCACATCAATTCCCTGGAGCTTGGTGACTCTGCTGTGTATTTCTGTGCCAGCAGCCAAGCCAGCGGGGGGCTCCTCTTCGGGCCA	CASSQASGGLLF	4	4.59712e-05	TCRBV03	TCRBD02-01*01	TCRBJ02-01*01
CATCCTGAAGACAGCAGCTTCTACATCTGCAGTGCTAGAGGTCGGAGCAGATCCGGGAGTTATAATTCACCCCTCCACTTTGGGAAC	CSARGRSRSGSYNSPLHF	4	4.59712e-05	TCRBV20	TCRBD02-01*02	TCRBJ01-06*01
TCGGCTGCTCCCTCCCAGACATCTGTGTACTTCTGTGCCAGCAGACACACCAGACAGGGGGGATCCTACGAGCAGTACTTCGGGCCG	CASRHTRQGGSYEQYF	4	4.59712e-05	TCRBV06	TCRBD01-01*01	TCRBJ02-07*01
GTGACCAGTGCCCATCCTGAAGACAGCAGCTTCTACATCTGCAGTGCTGGTGGGGGTAGGACAGGGTTGAGAGCTTTCTTTGGACAA	CSAGGGRTGLRAFF	4	4.59712e-05	TCRBV20	TCRBD01-01*01	TCRBJ01-01*01
CAGCCCTCAGAACCCAGGGACTCAGCTGTGTACTTCTGTGCCAGCAGTTTAGACCCCACCAGGGAGGGCGGCTACACCTTCGGTTCG	CASSLDPTREGGYTF	4	4.59712e-05	TCRBV12	TCRBD02-01*02	TCRBJ01-02*01
ATCCAGCCCTCAGAACCCAGGGACTCAGCTGTGTACTTCTGTGCCAGCAGTGTAACAGGGGGCGTCTATGGCTACACCTTCGGTTCG	CASSVTGGVYGYTF	4	4.59712e-05	TCRBV12	TCRBD01-01*01	TCRBJ01-02*01
TTCTCCCTGTCCCTAGAGTCTGCCATCCCCAACCAGACAGCTCTTTACTTCTGTGCCGCCCCGAACAATGAGCAGTTCTTCGGGCCA	CAAPNNEQFF	4	4.59712e-05	TCRBV24		TCRBJ02-01*01
CAGCCCTCAGAACCCAGGGACTCAGCTGTGTACTTCTGTGCCAGCAGTTTAGACGACAGGGGCGGGCAGCCCCAGCATTTTGGTGAT	CASSLDDRGGQPQHF	4	4.59712e-05	TCRBV12	TCRBD01-01*01	TCRBJ01-05*01
GTGACCAGTGCCCATCCTGAAGACAGCAGCTTCTACATCTGCAGTGCTAGAGATAAAGTTACAGGGGCTGAAGCTTTCTTTGGACAA	CSARDKVTGAEAFF	4	4.59712e-05	TCRBV20	TCRBD01-01*01	TCRBJ01-01*01
ATCCAGCCCTCAGAACCCAGGGACTCAGCTGTGTACTTCTGTGCCAGCTCCACCGCGGGGGCGAACACTGAAGCTTTCTTTGGACAA	CASSTAGANTEAFF	4	4.59712e-05	TCRBV12	TCRBD02-01*01	TCRBJ01-01*01
CAGCCCTCAGAACCCAGGGACTCAGCTGTGTACTTCTGTGCCAGCAGTTCGGGACAGGGGGTCAATCAGCCCCAGCATTTTGGTGAT	CASSSGQGVNQPQHF	4	4.59712e-05	TCRBV12	TCRBD01-01*01	TCRBJ01-05*01
AAGATCCAGCCCTCAGAACCCAGGGACTCAGCTGTGTACTTCTGTGCCAGCAGCCTCTCCTCGGACAGAAAACTGTTTTTTGGCAGT	CASSLSSDRKLFF	4	4.59712e-05	TCRBV12	TCRBD01-01*01	TCRBJ01-04*01
CTTCACATCAATTCCCTGGAGCTTGGTGACTCTGCTGTGTATTTCTGTGCCAGCAGCCAAGAGGGAGGGAAGGAGGTCTTCGGTTCG	CASSQEGGKEVF	4	4.59712e-05	TCRBV03	TCRBD02-01*02	TCRBJ01-02*01
AAGATCCAGCCCTCAGAACCCAGGGACTCAGCTGTGTACTTCTGTGCCAGCAGTTTAGTGCCTAGCAACCTTCAGTACTTCGGCGCC	CASSLVPSNLQYF	4	4.59712e-05	TCRBV12	TCRBD02-01	TCRBJ02-04*01
GAGTCGGCTGCTCCCTCCCAAACATCTGTGTACTTCTGTGCCAGCAGTCCCGATCCGACTAGCACAGATACGCAGTATTTTGGCCCA	CASSPDPTSTDTQYF	4	4.59712e-05	TCRBV06	TCRBD02-01	TCRBJ02-03*01
TTGGAGTCGGCTGCTCCCTCCCAAACATCTGTGTACTTCTGTGCCAGCAGTTTTGGCGGGAACTTCTACGAGCAGTACTTCGGGCCG	CASSFGGNFYEQYF	4	4.59712e-05	TCRBV06	TCRBD02-01*02	TCRBJ02-07*01
CTACACACCCTGCAGCCAGAAGACTCGGCCCTGTATCTCTGTGCCAGCAGCCAAGGGGCTAGCCGGGAGACCCAGTACTTCGGGCCA	CASSQGASRETQYF	3	3.44784e-05	TCRBV04-02*01	TCRBD02-01	TCRBJ02-05*01
CACACCCTGCAGCCAGAAGACTCGGCCCTGTATCTCTGTGCCAGCAGTGCGACAGGGGGCTCCTACAATGAGCAGTTCTTCGGGCCA	CASSATGGSYNEQFF	3	3.44784e-05	TCRBV04-02*01	TCRBD01-01*01	TCRBJ02-01*01
CTGCAGCCAGAAGACTCGGCCCTGTATCTCTGTGCCAGCAGCCAAGAAACCGACTCCCTGGGGAACTATGGCTACACCTTCGGTTCG	CASSQETDSLGNYGYTF	3	3.44784e-05	TCRBV04-02*01		TCRBJ01-02*01
CTACACACCCTGCAGCCAGAAGACTCGGCCCTGTATCTCTGTGCCAGCAGCCAAGATGTCGCGCTATACGAGCAGTACTTCGGGCCG	CASSQDVALYEQYF	3	3.44784e-05	TCRBV04-02*01	TCRBD02-01	TCRBJ02-07*01
CACACCCTGCAGCCAGAAGACTCGGCCCTGTATCTCTGTGCCAGCAGCCCGCCGGGACAGGGGACCTATGGCTACACCTTCGGTTCG	CASSPPGQGTYGYTF	3	3.44784e-05	TCRBV04-02*01	TCRBD01-01*01	TCRBJ01-02*01
CTACACACCCTGCAGCCAGAAGACTCGGCCCTGTATCTCTGTGCCAGCAGCCAAGGCCGGGACACCTACGAGCAGTACTTCGGGCCG	CASSQGRDTYEQYF	3	3.44784e-05	TCRBV04-02*01	TCRBD01-01*01	TCRBJ02-07*01
ACTCTGACGATCCAGCGCACAGAGCAGCGGGACTCGGCCATGTATCGCTGTGCCAGCAGTAACACCTACGAGCAGTACTTCGGGCCG	CASSNTYEQYF	3	3.44784e-05	TCRBV07-06*01	TCRBD01-01*01	TCRBJ02-07*01
CTGACGATCCAGCGCACAGAGCAGCGGGACTCGGCCATGTATCGCTGTGCCAGCAGCGGGGGTACAGATACGCAGTATTTTGGCCCA	CASSGGTDTQYF	3	3.44784e-05	TCRBV07-06*01		TCRBJ02-03*01
AGCTCTCTGGAGCTGGGGGACTCAGCTTTGTATTTCTGTGCCAGCAGCGTAGGACAGGGGTGGATAAACACCATATATTTTGGAGAG	CASSVGQGWINTIYF	3	3.44784e-05	TCRBV09-01	TCRBD01-01*01	TCRBJ01-03*01
CTGAGCTCTCTGGAGCTGGGGGACTCAGCTTTGTATTTCTGTGCCAGCAGCGGGGGCGACCCGCGGGATACGCAGTATTTTGGCCCA	CASSGGDPRDTQYF	3	3.44784e-05	TCRBV09-01	TCRBD01-01*01	TCRBJ02-03*01
GAGCTGGGGGACTCAGCTTTGTATTTCTGTGCCAGCAGAATTAACCCTAGCGGGGCAAGCTCCTACAATGAGCAGTTCTTCGGGCCA	CASRINPSGASSYNEQFF	3	3.44784e-05	TCRBV09-01	TCRBD02-01*01	TCRBJ02-01*01
AGGCTGGAGTCGGCTGCTCCCTCCCAGACATCTGTGTACTTCTGTGCCAGCAGTTCTTTTCAGGGCACTGAAGCTTTCTTTGGACAA	CASSSFQGTEAFF	3	3.44784e-05	TCRBV06-01*01	TCRBD01-01*01	TCRBJ01-01*01
GAGTCGGCTGCTCCCTCCCAGACATCTGTGTACTTCTGTGCCAGCAGTGGGTGGGGGGCGCAAGTAAATGAGCAGTTCTTCGGGCCA	CASSGWGAQVNEQFF	3	3.44784e-05	TCRBV06-01*01		TCRBJ02-01*01
GCTGCTCCCTCCCAGACATCTGTGTACTTCTGTGCCAGCAGTGATGAGTTGGGGGCTCGGGGAGGAAACACCATATATTTTGGAGAG	CASSDELGARGGNTIYF	3	3.44784e-05	TCRBV06-01*01	TCRBD01-01*01	TCRBJ01-03*01
CTGGAGTCGGCTGCTCCCTCCCAGACATCTGTGTACTTCTGTGCCAGCATTATCCAGGGGGCGCGAAATGAGCAGTTCTTCGGGCCA	CASIIQGARNEQFF	3	3.44784e-05	TCRBV06-01*01	TCRBD01-01*01	TCRBJ02-01*01
AGGCTGGAGTCGGCTGCTCCCTCCCAGACATCTGTGTACTTCTGTGCCAGCAGTGGGACAGATAATTCACCCCTCCACTTTGGGAAC	CASSGTDNSPLHF	3	3.44784e-05	TCRBV06-01*01	TCRBD01-01*01	TCRBJ01-06*01
GCCTTGTTGCTGGGGGACTCGGCCCTCTATCTCTGTGCCAGCAGCTTGGGGACAGGAGAAGATGGTTCACCCCTCCACTTTGGGAAC	CASSLGTGEDGSPLHF	3	3.44784e-05	TCRBV05-06*01	TCRBD01-01*01	TCRBJ01-06*01
AACGCCTTGTTGCTGGGGGACTCGGCCCTCTATCTCTGTGCCAGCAGCCCATCTTGGGGGAATAATTCACCCCTCCACTTTGGGAAC	CASSPSWGNNSPLHF	3	3.44784e-05	TCRBV05-06*01		TCRBJ01-06*01
AACGCCTTGTTGCTGGGGGACTCGGCCCTCTATCTCTGTGCCAGCAGCTCCCCCGGACAGGGTGGAGGGCCCCTCCACTTTGGGAAC	CASSSPGQGGGPLHF	3	3.44784e-05	TCRBV05-06*01	TCRBD01-01*01	TCRBJ01-06*01
ACGATCCAGCGCACAGAGCAGCGGGACTCGGCCATGTATCGCTGTGCCAGCAGCTTCCAATCCTACAATGAGCAGTTCTTCGGGCCA	CASSFQSYNEQFF	3	3.44784e-05	TCRBV07-06*01	TCRBD01-01*01	TCRBJ02-01*01
CGCACAGAGCAGCGGGACTCGGCCATGTATCGCTGTGCCAGCAGCCTCCTCGGTGGTAGGGGGGCAGATACGCAGTATTTTGGCCCA	CASSLLGGRGADTQYF	3	3.44784e-05	TCRBV07-06*01		TCRBJ02-03*01
ATCCAGCGCACAGAGCAGCGGGACTCGGCCATGTATCGCTGTGCCAGCAGCTTAGCCGTAAACACCGGGGAGCTGTTTTTTGGAGAA	CASSLAVNTGELFF	3	3.44784e-05	TCRBV07-06*01	TCRBD02-01	TCRBJ02-02*01
CATCCGCTCACCAGGCCTGGGGACGCAGCCATGTACCTGTGTGCCACCAGCAGAGGACAGGGCCGTACACCCCTCCACTTTGGGAAC	CATSRGQGRTPLHF	3	3.44784e-05	TCRBV15-01*01	TCRBD01-01*01	TCRBJ01-06*01
TCACCAGGCCTGGGGGACGCAGCCATGTACCTGTGTGCCACCAGCAGAGGAGGAACGGGGGGGCAGGTCACGCAGTATTTTGGCCCA	CATSRGGTGGQVTQYF	3	3.44784e-05	TCRBV15-01*01	TCRBD02-01*01	TCRBJ02-03*01
ATCCGCTCACCAGGCCTGGGGGACGCAGCCATGTACCTGTGTGCCACCAGCAGAGGACAGGGCCAAGAGACCCAGTACTTCGGGCCA	CATSRGQGQETQYF	3	3.44784e-05	TCRBV15-01*01	TCRBD01-01*01	TCRBJ02-05*01
GACATCCGCTCACCAGGCCTGGGGGACGCAGCCATGTACCTGTGTGCCACCAGCAGAGATAAACAGTCAGGGCAGTTCTTCGGGCCA	CATSRDKQSGQFF	3	3.44784e-05	TCRBV15-01*01	TCRBD01-01*01	TCRBJ02-01*01
ATCCGCTCACCAGGCCTGGGGGACGCAGCCATGTACCTGTGTGCCACCAGCAGAGTGACTAGCTTCGATACGCAGTATTTTGGCCCA	CATSRVTSFDTQYF	3	3.44784e-05	TCRBV15-01*01	TCRBD02-01	TCRBJ02-03*01
CGCTCACCAGGCCTGGGGGACGCAGCCATGTACCTGTGTGCCACCAGCAGAGGGGCCCCGGGACAGGAGATCCACCCCTTCGGTTCG	CATSRGAPGQEIHPF	3	3.44784e-05	TCRBV15-01*01	TCRBD01-01*01	TCRBJ01-02*01
CTGGGGGACGCAGCCATGTACCTGTGTGCCACCAGCAGAGAAAGGACTAGCGGGGGGGCCGGCTACAATGAGCAGTTCTTCGGGCCA	CATSRERTSGGAGYNEQFF	3	3.44784e-05	TCRBV15-01*01	TCRBD02-01*01	TCRBJ02-01*01
ATCCGCTCACCAGGCCTGGGGGACGCAGCCATGTACCTGTGTGCCACCAGCAGAGATTTAATCCCCTACGAGCAGTACTTCGGGCCG	CATSRDLIPYEQYF	3	3.44784e-05	TCRBV15-01*01	TCRBD02-01	TCRBJ02-07*01
GACATCCGCTCACCAGGCCTGGGGGACGCAGCCATGTACCTGTGTGCCACCAGCAGAGATGGGTTCCGGGAGCTGTTTTTTGGAGAA	CATSRDGFRELFF	3	3.44784e-05	TCRBV15-01*01		TCRBJ02-02*01
CGCTCACCAGGCCTGGGGGACGCAGCCATGTACCTGTGTGCCACCAGCAGAGATCCTACTAGCACAGATACGCAGTATTTTGGCCCA	CATSRDPTSTDTQYF	3	3.44784e-05	TCRBV15-01*01	TCRBD02-01	TCRBJ02-03*01
GACATCCGCTCACCAGGCCTGGGGGACGCAGCCATGTACCTGTGTGCCACCAGCAGAGAGTGGGACAGAGGATCCCATTTTGGTGAT	CATSREWDRGSHF	3	3.44784e-05	TCRBV15-01*01	TCRBD01-01*01	TCRBJ01-05*01
CTTGACATCCGCTCACCAGGCCTGGGGGACGCAGCCATGTACCTGTGTGCCACCAGCAGAGATGTGGAGACCCAGTACTTCGGGCCA	CATSRDVETQYF	3	3.44784e-05	TCRBV15-01*01		TCRBJ02-05*01
CGCTCACCAGGCCTGGGGGACGCAGCCATGTACCTGTGTGCCACCAGCAGAGAACAGCTTGGGGGTGAAAAACTGTTTTTTGGCAGT	CATSREQLGGEKLFF	3	3.44784e-05	TCRBV15-01*01		TCRBJ01-04*01
GACATCCGCTCACCAGGCCTGGGGGACGCAGCCATGTACCTGTGTGCCACCAGCGTGGAAAAGGATGGGGGCTACACCTTCGGTTCG	CATSVEKDGGYTF	3	3.44784e-05	TCRBV15-01*01		TCRBJ01-02*01
CGCTCACCAGGCCTGGGGGACGCAGCCATGTACCTGTGTGCCACCAGCGAACCCGCCAGGGGAGGAGGGTGGGCTTTCTTTGGACAA	CATSEPARGGGWAFF	3	3.44784e-05	TCRBV15-01*01		TCRBJ01-01*01
ATCCGCTCACCAGGCCTGGGGGACGCAGCCATGTACCTGTGTGCCACCAGCCCGACAGGGGGGAACACTGAAGCTTTCTTTGGACAA	CATSPTGGNTEAFF	3	3.44784e-05	TCRBV15-01*01	TCRBD01-01*01	TCRBJ01-01*01
TCACCAGGCCTGGGGGACGCAGCCATGTACCTGTGTGCCACCAGCAGAGACAGGGACAGGGTTGGAGATACGCAGTATTTTGGCCCA	CATSRDRDRVGDTQYF	3	3.44784e-05	TCRBV15-01*01	TCRBD01-01*01	TCRBJ02-03*01
ATCCGCTCACCAGGCCTGGGGGACGCAGCCATGTACCTGTGTGCCACCAGCAGAGATACAGGGACCCATGAGCAGTTCTTCGGGCCA	CATSRDTGTHEQFF	3	3.44784e-05	TCRBV15-01*01	TCRBD01-01*01	TCRBJ02-01*01
CGCTCACCAGGCCTGGGGGACGCAGCCATGTACCTGTGTGCCACCAGGGCTGATACAGGAGCCTACAATGAGCAGTTCTTCGGGCCA	CATRADTGAYNEQFF	3	3.44784e-05	TCRBV15-01*01	TCRBD01-01*01	TCRBJ02-01*01
CGCTCACCAGGCCTGGGGGACGCAGCCATGTACCTGTGTGCCACCAGCTCCCGGGACAGGAGCTCCTACGAGCAGTACTTCGGGCCG	CATSSRDRSSYEQYF	3	3.44784e-05	TCRBV15-01*01	TCRBD01-01*01	TCRBJ02-07*01
CGCTCACCAGGCCTGGGGGACGCAGCCATGTACCTGTGTGCCACCAGCAGAGACCCCAGCGCAGAGAACGGAGCTTTCTTTGGACAA	CATSRDPSAENGAFF	3	3.44784e-05	TCRBV15-01*01	TCRBD02-01	TCRBJ01-01*01
TCACCAGGCCTGGGGGACGCAGCCATGTACCTGTGTGCCACCAGCAGAGCGCCGGGACAGGGGGCCGATGAGCAGTTCTTCGGGCCA	CATSRAPGQGADEQFF	3	3.44784e-05	TCRBV15-01*01	TCRBD01-01*01	TCRBJ02-01*01
CGCTCACCAGGCCTGGGGGACGCAGCCATGTACCTGTGTGCCACCAGCAGAGATAAGAGTTACAATCAGCCCCAGCATTTTGGTGAT	CATSRDKSYNQPQHF	3	3.44784e-05	TCRBV15-01*01	TCRBD02-01*02	TCRBJ01-05*01
CACGCCCTGCAGCCAGAAGACTCAGCCCTGTATCTCTGCGCCAGCAGCCTATCGGGACAGGGGGCGTACGAGCAGTACTTCGGGCCG	CASSLSGQGAYEQYF	3	3.44784e-05	TCRBV04-01*01	TCRBD01-01*01	TCRBJ02-07*01
CACGCCCTGCAGCCAGAAGACTCAGCCCTGTATCTCTGCGCCAGCAGCCATCGGACAGGGGTGAACACTGAAGCTTTCTTTGGACAA	CASSHRTGVNTEAFF	3	3.44784e-05	TCRBV04-01*01	TCRBD01-01*01	TCRBJ01-01*01
GCCCTGCAGCCAGAAGACTCAGCCCTGTATCTCTGCGCCAGCAGCCAAGTTTCGAGGCGGGGGCGAAGCGAGCAGTACTTCGGGCCG	CASSQVSRRGRSEQYF	3	3.44784e-05	TCRBV04-01*01	TCRBD02-01*01	TCRBJ02-07*01
CTACACGCCCTGCAGCCAGAAGACTCAGCCCTGTATCTCTGCGCCAGCAGCCAGAACGACCCAGGGAGGACCCAGCATTTTGGTGAT	CASSQNDPGRTQHF	3	3.44784e-05	TCRBV04-01*01	TCRBD02-01*02	TCRBJ01-05*01
CACGCCCTGCAGCCAGAAGACTCAGCCCTGTATCTCTGCGCCAGCAGCCAAGGAGGCAGGGTGGATTCACCCCTCCACTTTGGGAAC	CASSQGGRVDSPLHF	3	3.44784e-05	TCRBV04-01*01	TCRBD01-01*01	TCRBJ01-06*01
CTGCAGCCAGAAGACTCAGCCCTGTATCTCTGCGCCAGCAGCCGGCAACTAGCGGGGGATCTCACAGATACGCAGTATTTTGGCCCA	CASSRQLAGDLTDTQYF	3	3.44784e-05	TCRBV04-01*01	TCRBD02-01*01	TCRBJ02-03*01
CACGCCCTGCAGCCAGAAGACTCAGCCCTGTATCTCTGCGCCAGCAGCCAAGGGGGACTAGGTGGGGATGAGCAGTTCTTCGGGCCA	CASSQGGLGGDEQFF	3	3.44784e-05	TCRBV04-01*01	TCRBD02-01	TCRBJ02-01*01
CACGCCCTGCAGCCAGAAGACTCAGCCCTGTATCTCTGCGCCAGCAGCCAAGAGGGGGGGAGAGGAAACACCATATATTTTGGAGAG	CASSQEGGRGNTIYF	3	3.44784e-05	TCRBV04-01*01	TCRBD02-01*01	TCRBJ01-03*01
CTACACACCCTGCAGCCAGAAGACTCGGCCCTGTATCTCTGCGCCAGCAGCCAAGATAAACGGAATTCACCCCTCCACTTTGGGAAC	CASSQDKRNSPLHF	3	3.44784e-05	TCRBV04-03*01	TCRBD02-01	TCRBJ01-06*01
ACCCTGCAGCCAGAAGACTCGGCCCTGTATCTCTGCGCCAGCAGCCAAGGCTGGACTAGCGGACAAGAGACCCAGTACTTCGGGCCA	CASSQGWTSGQETQYF	3	3.44784e-05	TCRBV04-03*01	TCRBD02-01	TCRBJ02-05*01
CACACCCTGCAGCCAGAAGACTCGGCCCTGTATCTCTGCGCCAGCAGCCAAGGTGCGGGGAGTCAAGAGACCCAGTACTTCGGGCCA	CASSQGAGSQETQYF	3	3.44784e-05	TCRBV04-03*01	TCRBD02-01*01	TCRBJ02-05*01
CTACACACCCTGCAGCCAGAAGACTCGGCCCTGTATCTCTGCGCCAGCAGCCAAGATCGATGGGGTCCCGAGCAGTACTTCGGGCCG	CASSQDRWGPEQYF	3	3.44784e-05	TCRBV04-03*01		TCRBJ02-07*01
ACCCTGCAGCCAGAAGACTCGGCCCTGTATCTCTGCGCCAGCAGCCAAGATCCGGAGGGCCACACCGGGGAGCTGTTTTTTGGAGAA	CASSQDPEGHTGELFF	3	3.44784e-05	TCRBV04-03*01	TCRBD02-01*02	TCRBJ02-02*01
CACACCCTGCAGCCAGAAGACTCGGCCCTGTATCTCTGCGCCAGCAGCCAAGTGGGCCATACGCGAGAAAAACTGTTTTTTGGCAGT	CASSQVGHTREKLFF	3	3.44784e-05	TCRBV04-03*01	TCRBD01-01*01	TCRBJ01-04*01
ACCCTGCAGCCAGAAGACTCGGCCCTGTATCTCTGCGCCAGCAGCCAAGGGACTAGCGGGGGTCAAGAGACCCAGTACTTCGGGCCA	CASSQGTSGGQETQYF	3	3.44784e-05	TCRBV04-03*01	TCRBD02-01*01	TCRBJ02-05*01
CACACCCTGCAGCCAGAAGACTCGGCCCTGTATCTCTGCGCCAGCAGCCGAGGGGGGAGCTCCTACAATGAGCAGTTCTTCGGGCCA	CASSRGGSSYNEQFF	3	3.44784e-05	TCRBV04-03*01		TCRBJ02-01*01
GCCTTGTTGCTGGGGGACTCGGCCCTGTATCTCTGTGCCAGCAGCTTGGCCCCAGGGAATAGCAATCAGCCCCAGCATTTTGGTGAT	CASSLAPGNSNQPQHF	3	3.44784e-05	TCRBV05-05*01	TCRBD01-01*01	TCRBJ01-05*01
AACGCCTTGTTGCTGGGGGACTCGGCCCTGTATCTCTGTGCCAGCAGCTTGATGTGGGGGGCGACCTACGAGCAGTACTTCGGGCCG	CASSLMWGATYEQYF	3	3.44784e-05	TCRBV05-05*01		TCRBJ02-07*01
GCCTTGTTGCTGGGGGACTCGGCCCTGTATCTCTGTGCCAGCAGCTTGGACCAGGGGGCGACAAATGAAAAACTGTTTTTTGGCAGT	CASSLDQGATNEKLFF	3	3.44784e-05	TCRBV05-05*01	TCRBD01-01*01	TCRBJ01-04*01
AATGTGAACGCCTTGTTGCTGGGGGACTCGGCCCTGTATCTCTGTGCCAGCAGCACCCGACAGGGATCACCCCTCCACTTTGGGAAC	CASSTRQGSPLHF	3	3.44784e-05	TCRBV05-05*01	TCRBD01-01*01	TCRBJ01-06*01
AACGCCTTGTTGCTGGGGGACTCGGCCCTGTATCTCTGTGCCAGCAGCTGGGGGGGGCTGGGCAATCAGCCCCAGCATTTTGGTGAT	CASSWGGLGNQPQHF	3	3.44784e-05	TCRBV05-05*01	TCRBD02-01*01	TCRBJ01-05*01
AACGCCTTGTTGCTGGGGGACTCGGCCCTGTATCTCTGTGCCAGCAGCCTTAGCGGGGGAGCCTACAATGAGCAGTTCTTCGGGCCA	CASSLSGGAYNEQFF	3	3.44784e-05	TCRBV05-05*01	TCRBD02-01*01	TCRBJ02-01*01
CTGAATGTGAACGCCTTGTTGCTGGGGGACTCGGCCCTGTATCTCTGTGCCAGCATGTGGGGAGATTCCGAGCAGTACTTCGGGCCG	CASMWGDSEQYF	3	3.44784e-05	TCRBV05-05*01	TCRBD02-01*02	TCRBJ02-07*01
AACGCCTTGTTGCTGGGGGACTCGGCCCTGTATCTCTGTGCCAGCAGCTTCACTAGCGGGGGGGCGGTCACGCAGTATTTTGGCCCA	CASSFTSGGAVTQYF	3	3.44784e-05	TCRBV05-05*01	TCRBD02-01*01	TCRBJ02-03*01
AACGCCTTGTTGCTGGGGGACTCGGCCCTGTATCTCTGTGCCAGCAGCTTGGATTTCAGGGCGGGCACTGAAGCTTTCTTTGGACAA	CASSLDFRAGTEAFF	3	3.44784e-05	TCRBV05-05*01		TCRBJ01-01*01
TTGTTGCTGGGGGACTCGGCCCTGTATCTCTGTGCCAGCAGCTTGTACCCAGCGGGGGGGTCCACAGATACGCAGTATTTTGGCCCA	CASSLYPAGGSTDTQYF	3	3.44784e-05	TCRBV05-05*01	TCRBD02-01*01	TCRBJ02-03*01
AACGCCTTGTTGCTGGGGGACTCGGCCCTGTATCTCTGTGCCAGCAGCTTGGTACTAGCGGGGGGATCCGAGCAGTACTTCGGGCCG	CASSLVLAGGSEQYF	3	3.44784e-05	TCRBV05-05*01	TCRBD02-01*01	TCRBJ02-07*01
AATGTGAACGCCTTGTTGCTGGGGGACTCGGCCCTGTATCTCTGTGCCAGCAGCTTCGCAGGGAACTATGGCTACACCTTCGGTTCG	CASSFAGNYGYTF	3	3.44784e-05	TCRBV05-05*01	TCRBD01-01*01	TCRBJ01-02*01
AAGATCCGGTCCACAAAGCTGGAGGACTCAGCCATGTACTTCTGTGCCAGCAACCGGGGAGGGGACCACGAGCAGTACTTCGGGCCG	CASNRGGDHEQYF	3	3.44784e-05	TCRBV02-01*01	TCRBD02-01*02	TCRBJ02-07*01
ATCCGGTCCACAAAGCTGGAGGACTCAGCCATGTACTTCTGTGCCAGCAAACGGACAGACTACAATCAGCCCCAGCATTTTGGTGAT	CASKRTDYNQPQHF	3	3.44784e-05	TCRBV02-01*01	TCRBD01-01*01	TCRBJ01-05*01
AAGATCCGGTCCACAAAGCTGGAGGACTCAGCCATGTACTTCTGTGCCAGACAGGGCAGTGGTAATGAAAAACTGTTTTTTGGCAGT	CARQGSGNEKLFF	3	3.44784e-05	TCRBV02-01*01	TCRBD01-01*01	TCRBJ01-04*01
TTCACTCTGAAGATCCGGTCCACAAAGCTGGAGGACTCAGCCATGTACTTCTGTGACACTAAGGGTCAGCCCCAGCATTTTGGTGAT	CDTKGQPQHF	3	3.44784e-05	TCRBV02-01*01		TCRBJ01-05*01
AAGATCCGGTCCACAAAGCTGGAGGACTCAGCCATGTACTTCTGTGCCAGCACCGTGGGCAGGGAATATGGCTACACCTTCGGTTCG	CASTVGREYGYTF	3	3.44784e-05	TCRBV02-01*01	TCRBD01-01*01	TCRBJ01-02*01
AGCTCTCTGGAGCTGGGGGACTCAGCTTTGTATTTCTGTGCCAGCAGCGCTCTGACAGTGACAAACTATGGCTACACCTTCGGTTCG	CASSALTVTNYGYTF	3	3.44784e-05	TCRBV09-01	TCRBD01-01*01	TCRBJ01-02*01
CTGAGCTCTCTGGAGCTGGGGGACTCAGCTTTGTATTTCTGTGCCAGCAGCGAGGGGACAGTGGGTCAGCCCCAGCATTTTGGTGAT	CASSEGTVGQPQHF	3	3.44784e-05	TCRBV09-01	TCRBD01-01*01	TCRBJ01-05*01
AGCTCTCTGGAGCTGGGGGACTCAGCTTTGTATTTCTGTGCCAGCAGCTTATCAGGGGTAGGCACCGGGGAGCTGTTTTTTGGAGAA	CASSLSGVGTGELFF	3	3.44784e-05	TCRBV09-01	TCRBD01-01*01	TCRBJ02-02*01
CTGAGCTCTCTGGAGCTGGGGGACTCAGCTTTGTATTTCTGTGCCAGCAGCGCGAGGGGAGGGGACTATGGCTACACCTTCGGTTCG	CASSARGGDYGYTF	3	3.44784e-05	TCRBV09-01	TCRBD02-01*02	TCRBJ01-02*01
CTGAGCTCTCTGGAGCTGGGGGACTCAGCTTTGTATTTCTGTGCCAGCAGCGTAGGGGGCGGGAACACTGAAGCTTTCTTTGGACAA	CASSVGGGNTEAFF	3	3.44784e-05	TCRBV09-01	TCRBD01-01*01	TCRBJ01-01*01
CTGAGCTCTCTGGAGCTGGGGGACTCAGCTTTGTATTTCTGTGCCAGCAGCGTAGGTTCAGGGGACTATGGCTACACCTTCGGTTCG	CASSVGSGDYGYTF	3	3.44784e-05	TCRBV09-01	TCRBD01-01*01	TCRBJ01-02*01
AGCTCTCTGGAGCTGGGGGACTCAGCTTTGTATTTCTGTGCCAGCAGCGTAGGGTCCGGGACCGTTGAAAAACTGTTTTTTGGCAGT	CASSVGSGTVEKLFF	3	3.44784e-05	TCRBV09-01		TCRBJ01-04*01
GAGCTGGGGGACTCAGCTTTGTATTTCTGTGCCAGCAGCCCCCGGGCTAGCGGGGGGGGCACCACAGATACGCAGTATTTTGGCCCA	CASSPRASGGGTTDTQYF	3	3.44784e-05	TCRBV09-01	TCRBD02-01*01	TCRBJ02-03*01
CTGAGCTCTCTGGAGCTGGGGGACTCAGCTTTGTATTTCTGTGCCAGCAGCCGGGGGGGGAGCACAGATACGCAGTATTTTGGCCCA	CASSRGGSTDTQYF	3	3.44784e-05	TCRBV09-01	TCRBD02-01*01	TCRBJ02-03*01
GAGCTGGGGGACTCAGCTTTGTATTTCTGTGCCAGCAGCGTAGCGGACGGGACTAGCGGGCACACAGATACGCAGTATTTTGGCCCA	CASSVADGTSGHTDTQYF	3	3.44784e-05	TCRBV09-01	TCRBD02-01	TCRBJ02-03*01
AACCTGAGCTCTCTGGAGCTGGGGGACTCAGCTTTGTATTTCTGTGCCAGCAGCGTAGGATGGAAAGAGACCCAGTACTTCGGGCCA	CASSVGWKETQYF	3	3.44784e-05	TCRBV09-01		TCRBJ02-05*01
AGCTCTCTGGAGCTGGGGGACTCAGCTTTGTATTTCTGTGCCAGCAGCGTAATGGCCCCCAGCACAGATACGCAGTATTTTGGCCCA	CASSVMAPSTDTQYF	3	3.44784e-05	TCRBV09-01	TCRBD01-01*01	TCRBJ02-03*01
TCTCTGGAGCTGGGGGACTCAGCTTTGTATTTCTGTGCCAGCAGCGTAGAGGACAGGGTGTCCTACAATGAGCAGTTCTTCGGGCCA	CASSVEDRVSYNEQFF	3	3.44784e-05	TCRBV09-01	TCRBD01-01*01	TCRBJ02-01*01
TCTCTGGAGCTGGGGGACTCAGCTTTGTATTTCTGTGCCAGCAGCGTAGTTGCGGGGGGGCGAACCGGGGAGCTGTTTTTTGGAGAA	CASSVVAGGRTGELFF	3	3.44784e-05	TCRBV09-01	TCRBD02-01*01	TCRBJ02-02*01
TCTCTGGAGCTGGGGGACTCAGCTTTGTATTTCTGTGCCAGCAGCGTAAGGGCCAGCGGGTTGACAGATACGCAGTATTTTGGCCCA	CASSVRASGLTDTQYF	3	3.44784e-05	TCRBV09-01	TCRBD02-01	TCRBJ02-03*01
ACCTTGGAGCTGGGGGACTCGGCCCTTTATCTTTGCGCCAGCAGCTTGGTGGTCAGCGGCTACACCGGGGAGCTGTTTTTTGGAGAA	CASSLVVSGYTGELFF	3	3.44784e-05	TCRBV05-01*01	TCRBD02-01	TCRBJ02-02*01
GTGAGTGCCTTGGAGCTGGGGGACTCGGCCCTGTATCTCTGTGCCAGAAGCTGGTCCAGGAAGGGGAGTGGCTACACCTTCGGTTCG	CARSWSRKGSGYTF	3	3.44784e-05	TCRBV05-03		TCRBJ01-02*01
TTGGAGCTGGGGGACTCGGCCCTGTATCTCTGTGCCAGAAGCTTGGACTGCTTGCTTGGAGGCAATCAGCCCCAGCATTTTGGTGAT	CARSLDCLLGGNQPQHF	3	3.44784e-05	TCRBV05-03	TCRBD02-01*02	TCRBJ01-05*01
GCCTTGGAGCTGGGGGACTCGGCCCTGTATCTCTGTGCCAGAAGCTCCGACCGGACAGGGCACTCCTACGAGCAGTACTTCGGGCCG	CARSSDRTGHSYEQYF	3	3.44784e-05	TCRBV05-03	TCRBD01-01*01	TCRBJ02-07*01
AGGCTGGAGTCGGCTGCTCCCTCCCAGACATCTGTGTACTTCTGTGCCAGCAGGCTAGACCTGAACTATGGCTACACCTTCGGTTCG	CASRLDLNYGYTF	3	3.44784e-05	TCRBV06-01*01	TCRBD02-01	TCRBJ01-02*01
CTGGAGTCGGCTGCTCCCTCCCAGACATCTGTGTACTTCTGTGCCAGCAGTGACCCCGCTATGGGCACTGAAGCTTTCTTTGGACAA	CASSDPAMGTEAFF	3	3.44784e-05	TCRBV06-01*01		TCRBJ01-01*01
GAGTCGGCTGCTCCCTCCCAGACATCTGTGTACTTCTGTGCCAGCAGTGAAGCGCCCTCTGGGGCCAACGTCCTGACTTTCGGGGCC	CASSEAPSGANVLTF	3	3.44784e-05	TCRBV06-01*01		TCRBJ02-06*01
CTCAGGCTGGAGTCGGCTGCTCCCTCCCAGACATCTGTGTACTTCTGTGCCAGCAGTGACAGGGTAAACACCATATATTTTGGAGAG	CASSDRVNTIYF	3	3.44784e-05	TCRBV06-01*01	TCRBD01-01*01	TCRBJ01-03*01
TCGGCTGCTCCCTCCCAGACATCTGTGTACTTCTGTGCCAGCAGTGCCCACAGGGGTAACTCTGGAAACACCATATATTTTGGAGAG	CASSAHRGNSGNTIYF	3	3.44784e-05	TCRBV06-01*01	TCRBD01-01*01	TCRBJ01-03*01
AGGCTGGAGTCGGCTGCTCCCTCCCAGACATCTGTGTACTTCTGTGCCAGCACACTAGATACCACAGATACGCAGTATTTTGGCCCA	CASTLDTTDTQYF	3	3.44784e-05	TCRBV06-01*01	TCRBD02-01	TCRBJ02-03*01
GAGTCGGCTGCTCCCTCCCAGACATCTGTGTACTTCTGTGCCAGCAGTGCACAGGGTTCTGGCACAGATACGCAGTATTTTGGCCCA	CASSAQGSGTDTQYF	3	3.44784e-05	TCRBV06-01*01	TCRBD01-01*01	TCRBJ02-03*01
CTGGAGTCGGCTGCTCCCTCCCAGACATCTGTGTACTTCTGTGCCAGCAGCCCAGGACAGTATAATTCACCCCTCCACTTTGGGAAC	CASSPGQYNSPLHF	3	3.44784e-05	TCRBV06-01*01	TCRBD01-01*01	TCRBJ01-06*01
AGGCTGGAGTCGGCTGCTCCCTCCCAGACATCTGTGTACTTCTGTGCCATCGACAGGGGCCCCTACAATGAGCAGTTCTTCGGGCCA	CAIDRGPYNEQFF	3	3.44784e-05	TCRBV06-01*01	TCRBD01-01*01	TCRBJ02-01*01
GAGTCGGCTGCTCCCTCCCAGACATCTGTGTACTTCTGTGCCAGCAGTGAAAAGGTAGCGGGGAACGATGAGCAGTTCTTCGGGCCA	CASSEKVAGNDEQFF	3	3.44784e-05	TCRBV06-01*01	TCRBD02-01*01	TCRBJ02-01*01
GAGTCGGCTGCTCCCTCCCAGACATCTGTGTACTTCTGTGCCAGCACCTCACTGGGGGCGGGAAAAAATGAGCAGTTCTTCGGGCCA	CASTSLGAGKNEQFF	3	3.44784e-05	TCRBV06-01*01		TCRBJ02-01*01
AGGCTGGAGTCGGCTGCTCCCTCCCAGACATCTGTGTACTTCTGTGCCAGCAGGGGCACGACTAGACGCGAGCAGTACTTCGGGCCG	CASRGTTRREQYF	3	3.44784e-05	TCRBV06-01*01	TCRBD02-01	TCRBJ02-07*01
GAGTCGGCTGCTCCCTCCCAGACATCTGTGTACTTCTGTGCCAGTGGGTCCGGGCCCTTTCAAGGTTCACCCCTCCACTTTGGGAAC	CASGSGPFQGSPLHF	3	3.44784e-05	TCRBV06-01*01		TCRBJ01-06*01
GAGTCGGCTGCTCCCTCCCAGACATCTGTGTACTTCTGTGCCAGCAGTGAAATGCAGGGAAGCACCGGGGAGCTGTTTTTTGGAGAA	CASSEMQGSTGELFF	3	3.44784e-05	TCRBV06-01*01	TCRBD01-01*01	TCRBJ02-02*01
AGGCTGGAGTCGGCTGCTCCCTCCCAGACATCTGTGTACTTCTGTGCCAGCAACAGGGAGCAGAATTCACCCCTCCACTTTGGGAAC	CASNREQNSPLHF	3	3.44784e-05	TCRBV06-01*01	TCRBD01-01*01	TCRBJ01-06*01
AGGCTGGAGTCGGCTGCTCCCTCCCAGACATCTGTGTACTTCTGTGCCAGCCTCCCAGGTGCTGGGGAGACCCAGTACTTCGGGCCA	CASLPGAGETQYF	3	3.44784e-05	TCRBV06-01*01	TCRBD01-01*01	TCRBJ02-05*01
CTGGAGTCGGCTGCTCCCTCCCAGACATCTGTGTACTTCTGTGCCAGCAATGGTGGACAGGGGGATTATGGCTACACCTTCGGTTCG	CASNGGQGDYGYTF	3	3.44784e-05	TCRBV06-01*01	TCRBD01-01*01	TCRBJ01-02*01
GAGTCGGCTGCTCCCTCCCAGACATCTGTGTACTTCTGTGCCAGCAGGAGGGGGATTAGATTTTTGACTGAAGCTTTCTTTGGACAA	CASRRGIRFLTEAFF	3	3.44784e-05	TCRBV06-01*01	TCRBD01-01*01	TCRBJ01-01*01
CTGGAGTCGGCTGCTCCCTCCCAGACATCTGTGTACTTCTGTGCCAGCAGCCCGGGCAGGGGCCGTGGGCCCCAGCATTTTGGTGAT	CASSPGRGRGPQHF	3	3.44784e-05	TCRBV06-01*01	TCRBD01-01*01	TCRBJ01-05*01
CTGGAGTCGGCTGCTCCCTCCCAGACATCTGTGTACTTCTGTGCCAGCAGTGGGGACAGTGGCAATTCACCCCTCCACTTTGGGAAC	CASSGDSGNSPLHF	3	3.44784e-05	TCRBV06-01*01	TCRBD01-01*01	TCRBJ01-06*01
CTGGAGTCGGCTGCTCCCTCCCAGACATCTGTGTACTTCTGTGCCAGCAGTGTAGGGGATCCTTACAATGAGCAGTTCTTCGGGCCA	CASSVGDPYNEQFF	3	3.44784e-05	TCRBV06-01*01	TCRBD01-01*01	TCRBJ02-01*01
TCGGCTGCTCCCTCCCAGACATCTGTGTACTTCTGTGCCAGCAGTGAAAAACAGAGCTCCTATAATTCACCCCTCCACTTTGGGAAC	CASSEKQSSYNSPLHF	3	3.44784e-05	TCRBV06-01*01	TCRBD01-01*01	TCRBJ01-06*01
CTGGAGTCGGCTGCTCCCTCCCAGACATCTGTGTACTTCTGTGCCAGCAGCGCGGGACAAAGAGAGGGCCATCAGAAATTTGGGAAC	CASSAGQREGHQKF	3	3.44784e-05	TCRBV06-01*01		TCRBJ01-06*01
TCGGCTGCTCCCTCCCAGACATCTGTGTACTTCTGTGCCAGCAGTGAACTCGGACTAGCGGGGGGGGGTGAGCAGTTCTTCGGGCCA	CASSELGLAGGGEQFF	3	3.44784e-05	TCRBV06-01*01	TCRBD02-01*01	TCRBJ02-01*01
TCGGCTGCTCCCTCCCAGACATCTGTGTACTTCTGTGCCAGCAGTGAATACAGGGGTGTATCCTACAATGAGCAGTTCTTCGGGCCA	CASSEYRGVSYNEQFF	3	3.44784e-05	TCRBV06-01*01	TCRBD01-01*01	TCRBJ02-01*01
CTGGAGTCGGCTGCTCCCTCCCAGACATCTGTGTACTTCTGTGCCAGCAGTGAAGTTGGGTCTACCGGGGAGCTGTTTTTTGGAGAA	CASSEVGSTGELFF	3	3.44784e-05	TCRBV06-01*01		TCRBJ02-02*01
AGGCTGGAGTCGGCTGCTCCCTCCCAGACATCTGTGTACTTCTGTGCCAGCAGTGCCGGGGGCCGGGAGACCCAGTACTTCGGGCCA	CASSAGGRETQYF	3	3.44784e-05	TCRBV06-01*01		TCRBJ02-05*01
AGGCTGGAGTCGGCTGCTCCCTCCCAGACATCTGTGTACTTCTGTGCCAGCAGTGATGGGGATATTGGGGCGCAGTATTTTGGCCCA	CASSDGDIGAQYF	3	3.44784e-05	TCRBV06-01*01		TCRBJ02-03*01
GAGTCGGCTGCTCCCTCCCAGACATCTGTGTACTTCTGTGCCAGCAGTGAAACCTTGGGGACCTCCGATACGCAGTATTTTGGCCCA	CASSETLGTSDTQYF	3	3.44784e-05	TCRBV06-01*01		TCRBJ02-03*01
GTGAATGCCTTGGAGCTGGAGGACTCGGCCCTGTATCTCTGTGCCAGCAGCTTTAGACAGGGGTCTGGTGAGCAGTTCTTCGGGCCA	CASSFRQGSGEQFF	3	3.44784e-05	TCRBV05-08*01	TCRBD01-01*01	TCRBJ02-01*01
AATGTGAATGCCTTGGAGCTGGAGGACTCGGCCCTGTATCTCTGTGCCAGCAGCCCTCGGTTCACCGGGGAGCTGTTTTTTGGAGAA	CASSPRFTGELFF	3	3.44784e-05	TCRBV05-08*01	TCRBD02-01	TCRBJ02-02*01
AATGTGAATGCCTTGGAGCTGGAGGACTCGGCCCTGTATCTCTGTGCCAGCGGAGTTAACAGGTACAATGAGCAGTTCTTCGGGCCA	CASGVNRYNEQFF	3	3.44784e-05	TCRBV05-08*01	TCRBD01-01*01	TCRBJ02-01*01
TTGGAGCTGGAGGACTCGGCCCTGTATCTCTGTGCCAGCAGCCCCTCGAGGACAGGGGAGACTAATGAAAAACTGTTTTTTGGCAGT	CASSPSRTGETNEKLFF	3	3.44784e-05	TCRBV05-08*01	TCRBD01-01*01	TCRBJ01-04*01
GTGAATGCCTTGGAGCTGGAGGACTCGGCCCTGTATCTCTGTGCCAGCAGCTTTCCTCGCCCGGGTACTGAAGCTTTCTTTGGACAA	CASSFPRPGTEAFF	3	3.44784e-05	TCRBV05-08*01	TCRBD02-01	TCRBJ01-01*01
AATGCCTTGGAGCTGGAGGACTCGGCCCTGTATCTCTGTGCCAGCAGCCCTAGACAGCAGAATCAAGAGACCCAGTACTTCGGGCCA	CASSPRQQNQETQYF	3	3.44784e-05	TCRBV05-08*01	TCRBD01-01*01	TCRBJ02-05*01
GAGCTGAATGTGAATGCCTTGGAGCTGGAGGACTCGGCCCTGTATCTCTGTGCCAGCAGCCCCGGAATGAGGGAGTTCTTCGGGCCA	CASSPGMREFF	3	3.44784e-05	TCRBV05-08*01	TCRBD02-01*02	TCRBJ02-01*01
AATGCCTTGGAGCTGGAGGACTCGGCCCTGTATCTCTGTGCCAGCAGCTCCCTGACGGAGTCTAACTATGGCTACACCTTCGGTTCG	CASSSLTESNYGYTF	3	3.44784e-05	TCRBV05-08*01	TCRBD02-01*02	TCRBJ01-02*01
AATGCCTTGGAGCTGGAGGACTCGGCCCTGTATCTCTGTGCCAGCAGCCTAGGACAAGGACTGACCTACGAGCAGTACTTCGGGCCG	CASSLGQGLTYEQYF	3	3.44784e-05	TCRBV05-08*01		TCRBJ02-07*01
CTGGAGGACTCGGCCCTGTATCTCTGTGCCAGCAGCTTGGGCTGGGACTTTGCGGGGGGGAGCCACAATGAGCAGTTCTTCGGGCCA	CASSLGWDFAGGSHNEQFF	3	3.44784e-05	TCRBV05-08*01	TCRBD02-01*01	TCRBJ02-01*01
AATGCCTTGGAGCTGGAGGACTCGGCCCTGTATCTCTGTGCCAGCAGCTCCGGACTAGCGGGTCGCCACGAGCAGTACTTCGGGCCG	CASSSGLAGRHEQYF	3	3.44784e-05	TCRBV05-08*01	TCRBD02-01	TCRBJ02-07*01
AATGTGAATGCCTTGGAGCTGGAGGACTCGGCCCTGTATCTCTGTGCCAGCAGCTTGTACGGGGGCACTGAAGCTTTCTTTGGACAA	CASSLYGGTEAFF	3	3.44784e-05	TCRBV05-08*01	TCRBD02-01*01	TCRBJ01-01*01
AACGCCTTGTTGCTGGGGGACTCGGCCCTCTATCTCTGTGCCAGCAGCCGAGGGTTAGACCCCAATCAGCCCCAGCATTTTGGTGAT	CASSRGLDPNQPQHF	3	3.44784e-05	TCRBV05-06*01	TCRBD02-01*02	TCRBJ01-05*01
GCCTTGTTGCTGGGGGACTCGGCCCTCTATCTCTGTGCCAGCAGCTTGGACCGGGGTCGGGACACCGGGGAGCTGTTTTTTGGAGAA	CASSLDRGRDTGELFF	3	3.44784e-05	TCRBV05-06*01	TCRBD02-01*01	TCRBJ02-02*01
TTGTTGCTGGGGGACTCGGCCCTCTATCTCTGTGCCAGCAGCTTGACGGGACAGTCGTTCTCTGGAAACACCATATATTTTGGAGAG	CASSLTGQSFSGNTIYF	3	3.44784e-05	TCRBV05-06*01	TCRBD01-01*01	TCRBJ01-03*01
AACGCCTTGTTGCTGGGGGACTCGGCCCTCTATCTCTGTGCCAGCACCGGAGACAGGGGACGGAACACTGAAGCTTTCTTTGGACAA	CASTGDRGRNTEAFF	3	3.44784e-05	TCRBV05-06*01	TCRBD01-01*01	TCRBJ01-01*01
AACGCCTTGTTGCTGGGGGACTCGGCCCTCTATCTCTGTGCCAGCAGCCTAACAGGGGTGGGGACCGGGGAGCTGTTTTTTGGAGAA	CASSLTGVGTGELFF	3	3.44784e-05	TCRBV05-06*01	TCRBD01-01*01	TCRBJ02-02*01
GCCTTGTTGCTGGGGGACTCGGCCCTCTATCTCTGTGCCAGCAGCAACCGACTAGCGGGGATTACCGGGGAGCTGTTTTTTGGAGAA	CASSNRLAGITGELFF	3	3.44784e-05	TCRBV05-06*01	TCRBD02-01*01	TCRBJ02-02*01
GCCTTGTTGCTGGGGGACTCGGCCCTCTATCTCTGTGCCAGCAGCCCCGTCGGCCTAGCGGGGAACCACGAGCAGTACTTCGGGCCG	CASSPVGLAGNHEQYF	3	3.44784e-05	TCRBV05-06*01	TCRBD02-01*01	TCRBJ02-07*01
GCCTTGTTGCTGGGGGACTCGGCCCTCTATCTCTGTGCCAGCAGCCCAGCCGCGGGACAGGCTAATGAAAAACTGTTTTTTGGCAGT	CASSPAAGQANEKLFF	3	3.44784e-05	TCRBV05-06*01	TCRBD01-01*01	TCRBJ01-04*01
AACGCCTTGTTGCTGGGGGACTCGGCCCTCTATCTCTGTGCCAGCAGCGACGAGGGGGCGTGGGACAATGAGCAGTTCTTCGGGCCA	CASSDEGAWDNEQFF	3	3.44784e-05	TCRBV05-06*01	TCRBD01-01*01	TCRBJ02-01*01
AATGTGAACGCCTTGTTGCTGGGGGACTCGGCCCTCTATCTCTGTGCCAGCAGCTCGACAGTTAACTATGGCTACACCTTCGGTTCG	CASSSTVNYGYTF	3	3.44784e-05	TCRBV05-06*01	TCRBD01-01*01	TCRBJ01-02*01
CTGAATGTGAACGCCTTGTTGCTGGGGGACTCGGCCCTCTATCTCTGTGCCAGCAGCTTGGACACCTATGAAGCTTTCTTTGGACAA	CASSLDTYEAFF	3	3.44784e-05	TCRBV05-06*01		TCRBJ01-01*01
GTGAACGCCTTGTTGCTGGGGGACTCGGCCCTCTATCTCTGTGCCAGCAGCCTGGGACAGGGGAGTAGTGGCTACACCTTCGGTTCG	CASSLGQGSSGYTF	3	3.44784e-05	TCRBV05-06*01	TCRBD01-01*01	TCRBJ01-02*01
GTGAACGCCTTGTTGCTGGGGGACTCGGCCCTCTATCTCTGTGCCAGCAGCTCGGGACAGGTTCTAGATACGCAGTATTTTGGCCCA	CASSSGQVLDTQYF	3	3.44784e-05	TCRBV05-06*01	TCRBD01-01*01	TCRBJ02-03*01
TTGTTGCTGGGGGACTCGGCCCTCTATCTCTGTGCCAGCAGCTTTTTTCTGGGGCTAGCGGACCACAATGAGCAGTTCTTCGGGCCA	CASSFFLGLADHNEQFF	3	3.44784e-05	TCRBV05-06*01	TCRBD02-01	TCRBJ02-01*01
CTGAATGTGAACGCCTTGTTGCTGGGGGACTCGGCCCTCTATCTCTGTGCCAGCAGCTTGGGCACAGATACGCAGTATTTTGGCCCA	CASSLGTDTQYF	3	3.44784e-05	TCRBV05-06*01		TCRBJ02-03*01
AACGCCTTGTTGCTGGGGGACTCGGCCCTCTATCTCTGTGCCAGCAACCCTGGGTGGGGGCTGAACACTGAAGCTTTCTTTGGACAA	CASNPGWGLNTEAFF	3	3.44784e-05	TCRBV05-06*01	TCRBD01-01*01	TCRBJ01-01*01
GTGAACGCCTTGTTGCTGGGGGACTCGGCCCTCTATCTCTGTGCCAGCAGCTTGCGGGGAGAACCCTATGGCTACACCTTCGGTTCG	CASSLRGEPYGYTF	3	3.44784e-05	TCRBV05-06*01	TCRBD02-01	TCRBJ01-02*01
AATGTGAACGCCTTGTTGCTGGGGGACTCGGCCCTCTATCTCTGTGCCAGCAGCTTGCCGGTCCAAGAGACCCAGTACTTCGGGCCA	CASSLPVQETQYF	3	3.44784e-05	TCRBV05-06*01	TCRBD02-01	TCRBJ02-05*01
GTGAACGCCTTGTTGCTGGGGGACTCGGCCCTCTATCTCTGTGCCAGCAGCTTCAGGACGGCGGTTGCTGAAGCTTTCTTTGGACAA	CASSFRTAVAEAFF	3	3.44784e-05	TCRBV05-06*01		TCRBJ01-01*01
AATGTGAACGCCTTGTTGCTGGGGGACTCGGCCCTCTATCTCTGTGCCAGCAGCTTAGACCCCGGCACTGAAGCTTTCTTTGGACAA	CASSLDPGTEAFF	3	3.44784e-05	TCRBV05-06*01		TCRBJ01-01*01
GTGAACGCCTTGTTGCTGGGGGACTCGGCCCTCTATCTCTGTGCCAGCAGCCCACCGCTCCGTGGGGCCGAAGCTTTCTTTGGACAA	CASSPPLRGAEAFF	3	3.44784e-05	TCRBV05-06*01	TCRBD01-01*01	TCRBJ01-01*01
GTGAACGCCTTGTTGCTGGGGGACTCGGCCCTCTATCTCTGTGCCAGCAGCTTTAACACGGGGCCCTACGAGCAGTACTTCGGGCCG	CASSFNTGPYEQYF	3	3.44784e-05	TCRBV05-06*01		TCRBJ02-07*01
GTGAACGCCTTGTTGCTGGGGGACTCGGCCCTCTATCTCTGTGCCAGCAGCTCTTTGGGGACAGTAGGCGGCTACACCTTCGGTTCG	CASSSLGTVGGYTF	3	3.44784e-05	TCRBV05-06*01	TCRBD01-01*01	TCRBJ01-02*01
CACGCCCTGCAGCCAGAAGACTCAGCCCTGTATCTCTGCGCCAGCAGCCAAGTACAGGGAGGTAGCTATGGCTACACCTTCGGTTCG	CASSQVQGGSYGYTF	3	3.44784e-05	TCRBV04-01*01		TCRBJ01-02*01
GCCCTGCAGCCAGAAGACTCAGCCCTGTATCTCTGCGCCAGCAGCCAACAGGGACAGGGGATTTCATATGGCTACACCTTCGGTTCG	CASSQQGQGISYGYTF	3	3.44784e-05	TCRBV04-01*01	TCRBD01-01*01	TCRBJ01-02*01
CACGCCCTGCAGCCAGAAGACTCAGCCCTGTATCTCTGCGCCAGCAGCCAGGGCCGGGGGGGGAACGATGAGCAGTTCTTCGGGCCA	CASSQGRGGNDEQFF	3	3.44784e-05	TCRBV04-01*01	TCRBD02-01*01	TCRBJ02-01*01
CACGCCCTGCAGCCAGAAGACTCAGCCCTGTATCTCTGCGCCAGCAGCCAAGTAGTGCAGGCTTCCTACGAGCAGTACTTCGGGCCG	CASSQVVQASYEQYF	3	3.44784e-05	TCRBV04-01*01	TCRBD01-01*01	TCRBJ02-07*01
CACGCCCTGCAGCCAGAAGACTCAGCCCTGTATCTCTGCGCCAGCAGCCAAGTCTTTACCCCCGATTACGAGCAGTACTTCGGGCCG	CASSQVFTPDYEQYF	3	3.44784e-05	TCRBV04-01*01		TCRBJ02-07*01
CAGCCAGAAGACTCAGCCCTGTATCTCTGCGCCAGCAGCCAAGAAAGGGGGCTCCAGGGATTCACAGATACGCAGTATTTTGGCCCA	CASSQERGLQGFTDTQYF	3	3.44784e-05	TCRBV04-01*01	TCRBD01-01*01	TCRBJ02-03*01
CTGCAGCCAGAAGACTCAGCCCTGTATCTCTGCGCCAGCAGCCCCTCTCAAGCAGGGGGCACCTACAATGAGCAGTTCTTCGGGCCA	CASSPSQAGGTYNEQFF	3	3.44784e-05	TCRBV04-01*01	TCRBD01-01*01	TCRBJ02-01*01
CTGCAGCCAGAAGACTCAGCCCTGTATCTCTGCGCCAGCAGCCAAGGCTCGACAGGGGGCATGGGAGAGACCCAGTACTTCGGGCCA	CASSQGSTGGMGETQYF	3	3.44784e-05	TCRBV04-01*01	TCRBD01-01*01	TCRBJ02-05*01
CTACACGCCCTGCAGCCAGAAGACTCAGCCCTGTATCTCTGCGCCAGCAGCCCAAGGGAAGGGGGCACTGAAGCTTTCTTTGGACAA	CASSPREGGTEAFF	3	3.44784e-05	TCRBV04-01*01	TCRBD01-01*01	TCRBJ01-01*01
CACCTACACGCCCTGCAGCCAGAAGACTCAGCCCTGTATCTCTGCGCCAGCAGCCAAGGGGGGGTTCAGCCCCAGCATTTTGGTGAT	CASSQGGVQPQHF	3	3.44784e-05	TCRBV04-01*01	TCRBD02-01*01	TCRBJ01-05*01
CACGCCCTGCAGCCAGAAGACTCAGCCCTGTATCTCTGCGCCAGCAGCCAAGTCCCCGGGCGGACCGGGGAGCTGTTTTTTGGAGAA	CASSQVPGRTGELFF	3	3.44784e-05	TCRBV04-01*01		TCRBJ02-02*01
CTACACGCCCTGCAGCCAGAAGACTCAGCCCTGTATCTCTGCGCCAGCAGCCAAGTTGAGGGCCACAATGAGCAGTTCTTCGGGCCA	CASSQVEGHNEQFF	3	3.44784e-05	TCRBV04-01*01	TCRBD02-01*02	TCRBJ02-01*01
GCCCTGCAGCCAGAAGACTCAGCCCTGTATCTCTGCGCCAGCAGCCCCATTGGACTCGTCTCGGGCAATGAGCAGTTCTTCGGGCCA	CASSPIGLVSGNEQFF	3	3.44784e-05	TCRBV04-01*01	TCRBD02-01	TCRBJ02-01*01
CACGCCCTGCAGCCAGAAGACTCAGCCCTGTATCTCTGCGCCAGCAGCCACGGGACTAGCGGCACAGATACGCAGTATTTTGGCCCA	CASSHGTSGTDTQYF	3	3.44784e-05	TCRBV04-01*01	TCRBD02-01	TCRBJ02-03*01
CACCTACACGCCCTGCAGCCAGAAGACTCAGCCCTGTATCTCTGCGCCAGCAGCCAAGATCGTATCGGGGAGCTGTTTTTTGGAGAA	CASSQDRIGELFF	3	3.44784e-05	TCRBV04-01*01	TCRBD02-01	TCRBJ02-02*01
CTGCAGCCAGAAGACTCAGCCCTGTATCTCTGCGCCAGCAGCCAAGATTCAGGGGGGGGGACTTCAGATACGCAGTATTTTGGCCCA	CASSQDSGGGTSDTQYF	3	3.44784e-05	TCRBV04-01*01		TCRBJ02-03*01
CTGCAGCCAGAAGACTCAGCCCTGTATCTCTGCGCCAGCAGCCAAGATCGGTCCAACTCTGGGGCCAACGTCCTGACTTTCGGGGCC	CASSQDRSNSGANVLTF	3	3.44784e-05	TCRBV04-01*01	TCRBD02-01	TCRBJ02-06*01
GAAGACTCAGCCCTGTATCTCTGCGCCAGCAGCCAAGAGAGACTGGAGGGGCAGAGCTCCTATAATTCACCCCTCCACTTTGGGAAC	CASSQERLEGQSSYNSPLHF	3	3.44784e-05	TCRBV04-01*01	TCRBD02-01*02	TCRBJ01-06*01
CAGCCAGAAGACTCAGCCCTGTATCTCTGCGCCAGCAGCCAAGACTTTGTTAGGGCAGGCGATCGAGGTGAGCAGTTCTTCGGGCCA	CASSQDFVRAGDRGEQFF	3	3.44784e-05	TCRBV04-01*01		TCRBJ02-01*01
CACGCCCTGCAGCCAGAAGACTCAGCCCTGTATCTCTGCGCCAGCAGCCAAGAAGTAACAGGAGACACTGAAGCTTTCTTTGGACAA	CASSQEVTGDTEAFF	3	3.44784e-05	TCRBV04-01*01	TCRBD01-01*01	TCRBJ01-01*01
CTTCACCTACACGCCCTGCAGCCAGAAGACTCAGCCCTGTATCTCTGCGCCAGCAGCCAAGAGTACGGCCAGCAGTACTTCGGGCCG	CASSQEYGQQYF	3	3.44784e-05	TCRBV04-01*01		TCRBJ02-07*01
CTTCACCTACACGCCCTGCAGCCAGAAGACTCAGCCCTGTATCTCTGCGCCAGCAGCCACCCAAAAGAAAAACTGTTTTTTGGCAGT	CASSHPKEKLFF	3	3.44784e-05	TCRBV04-01*01	TCRBD01-01*01	TCRBJ01-04*01
CAGCCAGAAGACTCAGCCCTGTATCTCTGCGCCAGCAGCCAAGATCCCCCAAGAGGGGGATTTAATTCACCCCTCCACTTTGGGAAC	CASSQDPPRGGFNSPLHF	3	3.44784e-05	TCRBV04-01*01	TCRBD01-01*01	TCRBJ01-06*01
[truncated: 61,124 more rows]
[truncated: 3 more columns]
