# Supplementary material for: Immunization With the CSF-470 Vaccine Plus BCG and rhGM-CSF Induced in a Cutaneous Melanoma Patient a TCRβ Repertoire Found at Vaccination Site and Tumor Infiltrating Lymphocytes That Persisted in Blood
Source: Front Immunol. 2019 Sep 18;10:2213. doi: 10.3389/fimmu.2019.02213 (PMC6759869; doi:10.3389/fimmu.2019.02213)
Supplement: Supplementary Table 7 — PBMC-POST-2-IV productive rearrangements. [file Table_7.XLSX]

## Sheet: PBMC-POST-2-IV
Rearrangement	Amino_acid	Templates	Productive_frequency	v_resolved	d_resolved	j_resolved
AATGTGAACGCCTTGTTGCTGGGGGACTCGGCCCTGTATCTCTGTGCCAGCAGCTTATTGGGGAGGCCACCCCTCCACTTTGGGAAC	CASSLLGRPPLHF	1003	0.00889492	TCRBV05-05*01	TCRBD02-01*02	TCRBJ01-06*01
CTACACGCCCTGCAGCCAGAAGACTCAGCCCTGTATCTCTGCGCCAGCAGCCAGTTCGGGGGGGCTTACGAGCAGTACTTCGGGCCG	CASSQFGGAYEQYF	973	0.00862887	TCRBV04-01*01	TCRBD02-01*01	TCRBJ02-07*01
ATCCGCTCACCAGGCCTGGGGGACGCAGCCATGTACCTGTGTGCCACCAGCAGAGGACAGGGCCGTACACCCCTCCACTTTGGGAAC	CATSRGQGRTPLHF	953	0.0084515	TCRBV15-01*01	TCRBD01-01*01	TCRBJ01-06*01
ATCCAGCCCTCAGAACCCAGGGACTCAGCTGTGTACTTCTGTGCCAGCAGTTTGACAGGCACTAACTATGGCTACACCTTCGGTTCG	CASSLTGTNYGYTF	705	0.00625216	TCRBV12	TCRBD01-01*01	TCRBJ01-02*01
ATCCAGCCCTCAGAACCCAGGGACTCAGCTGTGTACTTCTGTGCCAGCAGTTTATGGCAAGTCAATCAGCCCCAGCATTTTGGTGAT	CASSLWQVNQPQHF	674	0.00597724	TCRBV12	TCRBD01-01*01	TCRBJ01-05*01
CACGCCCTGCAGCCAGAAGACTCAGCCCTGTATCTCTGCGCCGGAACTGAACCAGGGTTGGAGAGGACTGAAGCTTTCTTTGGACAA	CAGTEPGLERTEAFF	567	0.00502833	TCRBV04-01*01	TCRBD01-01*01	TCRBJ01-01*01
CTCAAGATCCAGCCTGCAAAGCTTGAGGACTCGGCCGTGTATCTCTGTGCCAGCAGCTTATATGGGGGAGAGCAGTACTTCGGGCCG	CASSLYGGEQYF	545	0.00483323	TCRBV11-02*02	unknown	TCRBJ02-07*01
AGGATCCAGCAGGTAGTGCGAGGAGATTCGGCAGCTTATTTCTGTGCCAGCTCACCGGTAGTACGTCATGGCTACACCTTCGGTTCG	CASSPVVRHGYTF	370	0.00328128	TCRBV18-01*01	TCRBD02-01	TCRBJ01-02*01
AACGCCTTGGAGCTGGACGACTCGGCCCTGTATCTCTGTGCCAGCAGCTTGCAGACTAGCGGGTTCTACGAGCAGTACTTCGGGCCG	CASSLQTSGFYEQYF	346	0.00306844	TCRBV05-04*01	TCRBD02-01	TCRBJ02-07*01
CAGCCCTCAGAACCCAGGGACTCAGCTGTGTACTTCTGTGCCAGCAGCCGGACAGGGGCGGGAGGAAACACCATATATTTTGGAGAG	CASSRTGAGGNTIYF	317	0.00281126	TCRBV12	TCRBD01-01*01	TCRBJ01-03*01
GCTACCCGCTCCCAGACATCTGTGTATTTCTGCGCCAGCAGTGAGGCGCCATCCGGGACAGTGAACACTGAAGCTTTCTTTGGACAA	CASSEAPSGTVNTEAFF	306	0.0027137	TCRBV10-02*01	TCRBD01-01*01	TCRBJ01-01*01
CTGGAGTCGCCCAGCCCCAACCAGACCTCTCTGTACTTCTGTGCCAGCAGTGTGGACAGGGGGCCCAATGAGCAGTTCTTCGGGCCA	CASSVDRGPNEQFF	301	0.00266936	TCRBV27-01*01	TCRBD01-01*01	TCRBJ02-01*01
ACGTTGGCGTCTGCTGTACCCTCTCAGACATCTGTGTACTTCTGTGCCAGCAGTGAGTCTAGCACAGATACGCAGTATTTTGGCCCA	CASSESSTDTQYF	267	0.00236784	TCRBV06-04	TCRBD02-01	TCRBJ02-03*01
CAGCGCACAGAGCGGGGGGACTCAGCCGTGTATCTCTGTGCCAGCAGCCCCACAGGGGTTGGCGCCGGGGAGCTGTTTTTTGGAGAA	CASSPTGVGAGELFF	267	0.00236784	TCRBV07-03*01	TCRBD01-01*01	TCRBJ02-02*01
ATCCAGCCCTCAGAACCCAGGGACTCAGCTGTGTATTTTTGTGCTAGTGGTGAGCTGGGGGGGGCGACTGAAGCTTTCTTTGGACAA	CASGELGGATEAFF	262	0.0023235	TCRBV12-05*01	TCRBD02-01*01	TCRBJ01-01*01
GTGAGCACCTTGGAGCTGGGGGACTCGGCCCTTTATCTTTGCGCCAGCAGCTGGGGACAGGGGGCCGGGGAGCTGTTTTTTGGAGAA	CASSWGQGAGELFF	253	0.00224368	TCRBV05-01*01	TCRBD01-01*01	TCRBJ02-02*01
AATGTGAGCACCTTGGAGCTGGGGGACTCGGCCCTTTATCTTTGCGCCAGCAGCGACCGTATGAACACTGAAGCTTTCTTTGGACAA	CASSDRMNTEAFF	249	0.00220821	TCRBV05-01*01	unknown	TCRBJ01-01*01
CTACACACCCTGCAGCCAGAAGACTCGGCCCTGTATCTCTGTGCCAGCAGCCAAGGGGGGGTCACAGATACGCAGTATTTTGGCCCA	CASSQGGVTDTQYF	239	0.00211953	TCRBV04-02*01	TCRBD02-01*01	TCRBJ02-03*01
CCCTCAGAACCCAGGGACTCAGCTGTGTATTTTTGTGCTAGTGGTTTGGGTGGCGACAGGGGGAAGTACGAGCAGTACTTCGGGCCG	CASGLGGDRGKYEQYF	229	0.00203084	TCRBV12-05*01	TCRBD01-01*01	TCRBJ02-07*01
GCCCATCCTGAAGACAGCAGCTTCTACATCTGCAGTGCCGGAAGACCGGGGGTGGCGATGGGCAATCAGCCCCAGCATTTTGGTGAT	CSAGRPGVAMGNQPQHF	226	0.00200424	TCRBV20	TCRBD02-01*01	TCRBJ01-05*01
CCTGCAGAACTGGAGGATTCTGGAGTTTATTTCTGTGCCAGCAGCCAAGAGGACGGCGGGCCCACAGATACGCAGTATTTTGGCCCA	CASSQEDGGPTDTQYF	216	0.00191556	TCRBV14-01*01	TCRBD02-01	TCRBJ02-03*01
ACCAGTGCCCATCCTGAAGACAGCAGCTTCTACATCTGCAGTGCTAGCCGGAGTAGATTCGAGAATTCACCCCTCCACTTTGGGAAC	CSASRSRFENSPLHF	211	0.00187121	TCRBV20	TCRBD02-01*02	TCRBJ01-06*01
TTGGAGCTGGGGGACTCGGCCCTTTATCTTTGCGCCAGCAGCTCCGCTCTAGCGGGGGAACGCTCCTACGAGCAGTACTTCGGGCCG	CASSSALAGERSYEQYF	199	0.00176479	TCRBV05-01*01	TCRBD02-01*01	TCRBJ02-07*01
TCGGCTGCTCCCTCCCAGACATCTGTGTACTTCTGTGCCAGCAGTGCTGACCCGAGGGGTAGCAATCAGCCCCAGCATTTTGGTGAT	CASSADPRGSNQPQHF	199	0.00176479	TCRBV06-01*01	unknown	TCRBJ01-05*01
ATCCAGCGCACAGAGCAGGGGGACTCGGCCATGTATCTCTGTGCCAGCAGGGACTCCTTGGGGACCTATGGCTACACCTTCGGTTCG	CASRDSLGTYGYTF	195	0.00172932	TCRBV07-09	unknown	TCRBJ01-02*01
ATCCTGGAGTCGCCCAGCCCCAACCAGACCTCTCTGTACTTCTGTGCCAGCAGTTTCGGCGGGAGAACTGAAGCTTTCTTTGGACAA	CASSFGGRTEAFF	186	0.00164951	TCRBV27-01*01	TCRBD02-01*02	TCRBJ01-01*01
ACATCGGCCCAAAAGAACCCGACAGCTTTCTATCTCTGTGCCAGTAGTATGAGTAACAGATACACCGGGGAGCTGTTTTTTGGAGAA	CASSMSNRYTGELFF	185	0.00164064	TCRBV19-01	TCRBD01-01*01	TCRBJ02-02*01
ATCAATTCCCTGGAGCTTGGTGACTCTGCTGTGTATTTCTGTGCCAGCAGCCCGGGACAGGGAGGGAATGGCTACACCTTCGGTTCG	CASSPGQGGNGYTF	178	0.00157856	TCRBV03	TCRBD01-01*01	TCRBJ01-02*01
AGGCTGGAGTTGGCTGCTCCCTCCCAGACATCTGTGTACTTCTGTGCCAGCAGTTCGACTGCTAACTATGGCTACACCTTCGGTTCG	CASSSTANYGYTF	177	0.00156969	TCRBV06-06	TCRBD02-01	TCRBJ01-02*01
AGTGCCCATCCTGAAGACAGCAGCTTCTACATCTGCAGTGCTAGTAGGGGACGGGGGGGCCTTAACTATGGCTACACCTTCGGTTCG	CSASRGRGGLNYGYTF	170	0.00150761	TCRBV20	TCRBD02-01*01	TCRBJ01-02*01
CAGCAGGTAGTGCGAGGAGATTCGGCAGCTTATTTCTGTGCCAGCTCACCTACAGGGTGGGGAAACACTGAAGCTTTCTTTGGACAA	CASSPTGWGNTEAFF	164	0.0014544	TCRBV18-01*01	TCRBD01-01*01	TCRBJ01-01*01
GTGACATCGGCCCAAAAGAACCCGACAGCTTTCTATCTCTGTGCCAGTACCGAAGGACAGGGACTCCCCCCCCAGCATTTTGGTGAT	CASTEGQGLPPQHF	157	0.00139233	TCRBV19-01	TCRBD01-01*01	TCRBJ01-05*01
CAGCAGGTAGTGCGAGGAGATTCGGCAGCTTATTTCTGTGCCAGCTCCCCCCTAGGGGGGTGGGGATACGAGCAGTACTTCGGGCCG	CASSPLGGWGYEQYF	139	0.0012327	TCRBV18-01*01	unknown	TCRBJ02-07*01
ATCCAGCCCTCAGAACCCAGGGACTCAGCTGTGTACTTCTGTGCCAGCAGTTTATTAGAGGCCCGCGGCGTAGCTTTCTTTGGACAA	CASSLLEARGVAFF	139	0.0012327	TCRBV12	TCRBD02-01	TCRBJ01-01*01
ATCCAGCCCTCAGAACCCAGGGACTCAGCTGTGTACTTCTGTGCCAGCAGCCTCGGGAAGGGGCCATCGCCCCAGCATTTTGGTGAT	CASSLGKGPSPQHF	138	0.00122383	TCRBV12	unknown	TCRBJ01-05*01
CCTGCAGAACTGGAGGATTCTGGAGTTTATTTCTGTGCCAGCAGCCAAGGGCAGGGACAGGGCTACAATGAGCAGTTCTTCGGGCCA	CASSQGQGQGYNEQFF	134	0.00118835	TCRBV14-01*01	TCRBD01-01*01	TCRBJ02-01*01
ACGTTGGCGTCTGCTGTACCCTCTCAGACATCTGTGTACTTCTGTGCCAGCAGTGACTCGGGGACAGATACGCAGTATTTTGGCCCA	CASSDSGTDTQYF	130	0.00115288	TCRBV06-04	unknown	TCRBJ02-03*01
CTGAACATGAGCTCCTTGGAGCTGGGGGACTCAGCCCTGTACTTCTGTGCCAGCAGCTCTGACAGTACGGTCCACACCTTCGGTTCG	CASSSDSTVHTF	127	0.00112628	TCRBV13-01*01	TCRBD01-01*01	TCRBJ01-02*01
ATCCGGTCCACAAAGCTGGAGGACTCAGCCATGTACTTCTGTGCCAGCACCGAGGGGGGTCACTACAATGAGCAGTTCTTCGGGCCA	CASTEGGHYNEQFF	125	0.00110854	TCRBV02-01*01	unknown	TCRBJ02-01*01
ATCCGGTCCACAAAGCTGGAGGACTCAGCCATGTACTTCTGTGCCAGCAGCAATCTGAATAGCAATCAGCCCCAGCATTTTGGTGAT	CASSNLNSNQPQHF	124	0.00109967	TCRBV02-01*01	unknown	TCRBJ01-05*01
CGCACAGAGCAGCGGGACTCGGCCATGTATCGCTGTGCCAGCAGCTTCGGGGCTTCAACCTCTGGAAACACCATATATTTTGGAGAG	CASSFGASTSGNTIYF	124	0.00109967	TCRBV07-06*01	unknown	TCRBJ01-03*01
CTGTCGGCTGCTCCCTCCCAGACATCTGTGTACTTCTGTGCCAGCAGTTACGTTCAGGGGGTTTCCTACGAGCAGTACTTCGGGCCG	CASSYVQGVSYEQYF	124	0.00109967	TCRBV06-05*01	TCRBD01-01*01	TCRBJ02-07*01
TCCCTGGAGCTTGGTGACTCTGCTGTGTATTTCTGTGCCAGCAGCCCATGGGTGGGGGGGGCCAAGAATGAGCAGTTCTTCGGGCCA	CASSPWVGGAKNEQFF	122	0.00108193	TCRBV03	TCRBD02-01*01	TCRBJ02-01*01
CAGCCTGCAAAGCTTGAGGACTCGGCCGTGTATCTCTGTGCCAGCAGCTTAGATCATCACGGACTCTACGAGCAGTACTTCGGGCCG	CASSLDHHGLYEQYF	120	0.0010642	TCRBV11-02*02	TCRBD02-01	TCRBJ02-07*01
ATCCAGCGCACACAGCAGGAGGACTCGGCCGTGTATCTCTGTGCCAGCAGCTCCGATCACTCAGAACAGCCCCAGCATTTTGGTGAT	CASSSDHSEQPQHF	114	0.00101099	TCRBV07-02*01	unknown	TCRBJ01-05*01
GCCCAAAAGAACCCGACAGCTTTCTATCTCTGTGCCAGTAGTATAGGGGCCGGGGGCCCGAACACCGGGGAGCTGTTTTTTGGAGAA	CASSIGAGGPNTGELFF	112	0.000993251	TCRBV19-01	unknown	TCRBJ02-02*01
AACGCCTTGTTGCTGGGGGACTCGGCCCTGTATCTCTGTGCCAGCACCGTCGGACAGGGGATTTCCTACGAGCAGTACTTCGGGCCG	CASTVGQGISYEQYF	106	0.000940041	TCRBV05-05*01	TCRBD01-01*01	TCRBJ02-07*01
CACACCCTGCAGCCAGAAGACTCGGCCCTGTATCTCTGCGCCAGCAGCCAAGAAGACGACCGACTCGGTGAAGCTTTCTTTGGACAA	CASSQEDDRLGEAFF	105	0.000931173	TCRBV04-03*01	TCRBD02-01	TCRBJ01-01*01
CTGCAGCCAGAAGACTCGGCCCTGTATCTCTGTGCCAGCAGCCAACAAGCAGGACAGGCCTATAATTCACCCCTCCACTTTGGGAAC	CASSQQAGQAYNSPLHF	102	0.000904568	TCRBV04-02*01	TCRBD01-01*01	TCRBJ01-06*01
ATCCAGCAGGTAGTGCGAGGAGATTCGGCAGCTTATTTCTGTGCCAGCTCACCACCGGCCAGGGTCCACGAGCAGTACTTCGGGCCG	CASSPPARVHEQYF	102	0.000904568	TCRBV18-01*01	TCRBD01-01*01	TCRBJ02-07*01
CAGCCCTCAGAACCCAGGGACTCAGCTGTGTACTTCTGTGCCAGCAGTTTAGCGTGGGGCCTGAACACTGAAGCTTTCTTTGGACAA	CASSLAWGLNTEAFF	100	0.000886831	TCRBV12	TCRBD01-01*01	TCRBJ01-01*01
AATGTGAGCACCTTGGAGCTGGGGGACTCGGCCCTTTATCTTTGCGCCAGCAGCTTGGGGCAGATCTACGAGCAGTACTTCGGGCCG	CASSLGQIYEQYF	100	0.000886831	TCRBV05-01*01	TCRBD01-01*01	TCRBJ02-07*01
GTGACATCGGCCCAAAAGAACCCGACAGCTTTCTATCTCTGTGCCAGTAGTATGGGCCAGGGGGGAACTGAAGCTTTCTTTGGACAA	CASSMGQGGTEAFF	99	0.000877963	TCRBV19-01	TCRBD01-01*01	TCRBJ01-01*01
CTGGAGTCGCCCAGCCCCAACCAGACCTCTCTGTACTTCTGTGCCAGCAGTTTCGGCGGGGATAATGAAAAACTGTTTTTTGGCAGT	CASSFGGDNEKLFF	97	0.000860226	TCRBV27-01*01	TCRBD02-01*01	TCRBJ01-04*01
CCCAGCCCCAACCAGACCTCTCTGTACTTCTGTGCCAGCAGTTTATCTCGTACAGGACAGGGGGCGCGGGAGCAGTACTTCGGGCCG	CASSLSRTGQGAREQYF	96	0.000851358	TCRBV27-01*01	TCRBD01-01*01	TCRBJ02-07*01
AATTCCCTGGAGCTTGGTGACTCTGCTGTGTATTTCTGTGCCAGCAGCCCCCGGAATTCTGGGGCCAACGTCCTGACTTTCGGGGCC	CASSPRNSGANVLTF	90	0.000798148	TCRBV03	unknown	TCRBJ02-06*01
AGCTCTCTGGAGCTGGGGGACTCAGCTTTGTATTTCTGTGCCAGCAGCGCCGACAGGGCTACCTACAATGAGCAGTTCTTCGGGCCA	CASSADRATYNEQFF	89	0.00078928	TCRBV09-01	TCRBD01-01*01	TCRBJ02-01*01
CCTGCAAAGCTTGAGGACTCGGCCGTGTATCTCTGTGCCAGCAGCACCCGGGACCCGAGCTCTGGAAACACCATATATTTTGGAGAG	CASSTRDPSSGNTIYF	89	0.00078928	TCRBV11-02*02	unknown	TCRBJ01-03*01
ACTCTGGAGTCCGCTACCAGCTCCCAGACATCTGTGTACTTCTGTGCCATCAGTGGGGACAGCTCCAATGAGCAGTTCTTCGGGCCA	CAISGDSSNEQFF	87	0.000771543	TCRBV10-03*01	TCRBD01-01*01	TCRBJ02-01*01
CTGAGCTCTCTGGAGCTGGGGGACTCAGCTTTGTATTTCTGTGCCAGCAGCGTAGATGGCGCTAATCAGCCCCAGCATTTTGGTGAT	CASSVDGANQPQHF	83	0.00073607	TCRBV09-01	unknown	TCRBJ01-05*01
ACCTTGGAGCTGGGGGACTCGGCCCTTTATCTTTGCGCCAGCAGCTTGGGACAGGGAAATAGCAATCAGCCCCAGCATTTTGGTGAT	CASSLGQGNSNQPQHF	82	0.000727202	TCRBV05-01*01	TCRBD01-01*01	TCRBJ01-05*01
GCCCTGCAGCCAGAAGACTCAGCCCTGTATCTCTGCGCCAGCAGCCAAGACCGAGGTAGCGGGACAGATACGCAGTATTTTGGCCCA	CASSQDRGSGTDTQYF	82	0.000727202	TCRBV04-01*01	TCRBD02-01	TCRBJ02-03*01
CCCAGCCCCAACCAGACCTCTCTGTACTTCTGTGCCAGCAGACCCAACCGGGCGGCAGGTTATAACTATGGCTACACCTTCGGTTCG	CASRPNRAAGYNYGYTF	82	0.000727202	TCRBV27-01*01	unknown	TCRBJ01-02*01
AGCACCTTGGAGCTGGGGGACTCGGCCCTTTATCTTTGCGCCAGCAGGGGGGGAGTCGCAACTAATGAAAAACTGTTTTTTGGCAGT	CASRGGVATNEKLFF	82	0.000727202	TCRBV05-01*01	TCRBD02-01*01	TCRBJ01-04*01
AAGATCCAGCCTGCAAAGCTTGAGGACTCGGCCGTGTATCTCTGTGCCAGCAGCTTAGGGTTTGCTGCTGAAGCTTTCTTTGGACAA	CASSLGFAAEAFF	82	0.000727202	TCRBV11-02*02	unknown	TCRBJ01-01*01
ATCCAGCCCTCAGAACCCAGGGACTCAGCTGTGTACTTCTGTGCCAGCAGTCAACCAGTAAGCCGCAATGAGCAGTTCTTCGGGCCA	CASSQPVSRNEQFF	81	0.000718333	TCRBV12	unknown	TCRBJ02-01*01
ATCCAGCAGGTAGTGCGAGGAGATTCGGCAGCTTATTTCTGTGCCAGCACGTCCGGGACAGGAACCTACGAGCAGTACTTCGGGCCG	CASTSGTGTYEQYF	81	0.000718333	TCRBV18-01*01	TCRBD01-01*01	TCRBJ02-07*01
ACATCGGCCCAAAAGAACCCGACAGCTTTCTATCTCTGTGCCAGTAGTGAGACAGGGGGCGTTAGTCAGCCCCAGCATTTTGGTGAT	CASSETGGVSQPQHF	80	0.000709465	TCRBV19-01	TCRBD01-01*01	TCRBJ01-05*01
ACCAGTGCCCATCCTGAAGACAGCAGCTTCTACATCTGCAGTGCTAGAGGACAGGGATCCATGAACACTGAAGCTTTCTTTGGACAA	CSARGQGSMNTEAFF	79	0.000700597	TCRBV20	TCRBD01-01*01	TCRBJ01-01*01
GTGACCAGTGCCCATCCTGAAGACAGCAGCTTCTACATCTGCAGTGCTAGAGGCGACGGGTTATCCTACGAGCAGTACTTCGGGCCG	CSARGDGLSYEQYF	79	0.000700597	TCRBV20	TCRBD02-01	TCRBJ02-07*01
CTACACGCCCTGCAGCCAGAAGACTCAGCCCTGTATCTCTGCGCCAGCAGCCAAGGTGGGCCCCTGAATGAGCAGTTCTTCGGGCCA	CASSQGGPLNEQFF	78	0.000691729	TCRBV04-01*01	TCRBD01-01*01	TCRBJ02-01*01
ACTGTGACATCGGCCCAAAAGAACCCGACAGCTTTCTATCTCTGTGCCAGTAGTCCTGGGTCTAACTATGGCTACACCTTCGGTTCG	CASSPGSNYGYTF	77	0.00068286	TCRBV19-01	unknown	TCRBJ01-02*01
CAGCCTGCAAAGCTTGAGGACTCGGCCGTGTATCTCTGTGCCAGCAGCTTAGATCCTGGGGCTAACTATGGCTACACCTTCGGTTCG	CASSLDPGANYGYTF	77	0.00068286	TCRBV11-02*02	unknown	TCRBJ01-02*01
ACAGTGACCAGTGCCCATCCTGAAGACAGCAGCTTCTACATCTGCAGTGCTAGGGGTAGGGATAGAGTAGGCTACACCTTCGGTTCG	CSARGRDRVGYTF	75	0.000665124	TCRBV20	unknown	TCRBJ01-02*01
CCTCTCACTGTGACATCGGCCCAAAAGAACCCGACAGCTTTCTATCTCTGTGCCAGCACGGACGGCTACGAGCAGTACTTCGGGCCG	CASTDGYEQYF	74	0.000656255	TCRBV19-01	unknown	TCRBJ02-07*01
GCAAAGCTTGAGGACTCGGCCGTGTATCTCTGTGCCAGCAGCTTAGGTCGGACAGGTCGGCTTGGCGACGAGCAGTACTTCGGGCCG	CASSLGRTGRLGDEQYF	74	0.000656255	TCRBV11-02*02	TCRBD01-01*01	TCRBJ02-07*01
ACATCGGCCCAAAAGAACCCGACAGCTTTCTATCTCTGTGCCAGTAGTATGAGGCCAGGGGAGGGGACTGAAGCTTTCTTTGGACAA	CASSMRPGEGTEAFF	73	0.000647387	TCRBV19-01	TCRBD02-01*02	TCRBJ01-01*01
GTGACCAGTGCCCATCCTGAAGACAGCAGCTTCTACATCTGCAGTGCTAGATCTTTGAGGGAAATAGATACGCAGTATTTTGGCCCA	CSARSLREIDTQYF	72	0.000638519	TCRBV20	TCRBD02-01*02	TCRBJ02-03*01
ATCAATTCCCTGGAGCTTGGTGACTCTGCTGTGTATTTCTGTGCCAGCAGCCGGGGACTAGAACAAAACATTCAGTACTTCGGCGCC	CASSRGLEQNIQYF	72	0.000638519	TCRBV03	TCRBD02-01	TCRBJ02-04*01
CAGCCTGCAGAACTGGAGGATTCTGGAGTTTATTTCTGTGCCAGCAGCCAAGGTCTACGACAGGGCTATGGCTACACCTTCGGTTCG	CASSQGLRQGYGYTF	72	0.000638519	TCRBV14-01*01	TCRBD01-01*01	TCRBJ01-02*01
AGCTCTCTGGAGCTGGGGGACTCAGCTTTGTATTTCTGTGCCAGCAGCCCGATGGGGACAACTAATGAAAAACTGTTTTTTGGCAGT	CASSPMGTTNEKLFF	72	0.000638519	TCRBV09-01	unknown	TCRBJ01-04*01
ACCAGTGCCCATCCTGAAGACAGCAGCTTCTACATCTGCAGTGCTAGAACCCTAGCGGGGGGGCGTGAGACCCAGTACTTCGGGCCA	CSARTLAGGRETQYF	71	0.00062965	TCRBV20	TCRBD02-01*01	TCRBJ02-05*01
ATCCTGGAGTCGCCCAGCCCCAACCAGACCTCTCTGTACTTCTGTGCCAGCAGTTACGGACTCGGTGAAAAACTGTTTTTTGGCAGT	CASSYGLGEKLFF	70	0.000620782	TCRBV27-01*01	TCRBD02-01	TCRBJ01-04*01
ATCCAGCGCACACAGCAGGAGGACTCGGCCGTGTATCTCTGTGCCAGCAGCTTACAGGCCGGGGGGCGGGAGCAGTACTTCGGGCCG	CASSLQAGGREQYF	68	0.000603045	TCRBV07-02*01	TCRBD02-01*01	TCRBJ02-07*01
ACTCTGGAGTCTGCTGCCTCCTCCCAGACATCTGTATATTTCTGCGCCAGCAGTGAATGGAGGCGGTGCGAGCAGTACTTCGGGCCG	CASSEWRRCEQYF	68	0.000603045	TCRBV10-01	TCRBD02-01*02	TCRBJ02-07*01
ATCCAGCGCACAGAGCAGGGGGACTCGGCCATGTATCTCTGTGCCAGCAGCTTAGATGGCTGGAGAGCCGAAGCTTTCTTTGGACAA	CASSLDGWRAEAFF	68	0.000603045	TCRBV07-09	TCRBD02-01*02	TCRBJ01-01*01
ACTCTGACAGTGACCAGTGCCCATCCTGAAGACAGCAGCTTCTACATCTGCAGCCTCGACAGATTCAATGAGCAGTTCTTCGGGCCA	CSLDRFNEQFF	67	0.000594177	TCRBV20-01*01	TCRBD01-01*01	TCRBJ02-01*01
ACAGTGACCAGTGCCCATCCTGAAGACAGCAGCTTCTACATCTGCAGTGCCATCTGGACAGGGGGCGATGGCTACACCTTCGGTTCG	CSAIWTGGDGYTF	66	0.000585309	TCRBV20	TCRBD01-01*01	TCRBJ01-02*01
ACGATCCAGCGCACACAGCAGGAGGACTCGGCCGTGTATCTCTGTGCCAGCAGTGCCTGGGAAAACTATGGCTACACCTTCGGTTCG	CASSAWENYGYTF	65	0.00057644	TCRBV07-02*01	unknown	TCRBJ01-02*01
CTGAGCTCTCTGGAGCTGGGGGACTCAGCTTTGTATTTCTGTGCCAGCAGCGGCCAGGGTAGCACAGATACGCAGTATTTTGGCCCA	CASSGQGSTDTQYF	64	0.000567572	TCRBV09-01	TCRBD01-01*01	TCRBJ02-03*01
AGCTCTCTGGAGCTGGGGGACTCAGCTTTGTATTTCTGTGCCAGCAGCGAGGGACAGGGACGTTCCTACGAGCAGTACTTCGGGCCG	CASSEGQGRSYEQYF	64	0.000567572	TCRBV09-01	TCRBD01-01*01	TCRBJ02-07*01
AATTCCCTGGAGCTTGGTGACTCTGCTGTGTATTTCTGTGCCAGCAGCCAGAACGGGGGCTCTGGAAACACCATATATTTTGGAGAG	CASSQNGGSGNTIYF	64	0.000567572	TCRBV03	TCRBD02-01*01	TCRBJ01-03*01
GTGACCAGTGCCCATCCTGAAGACAGCAGCTTCTACATCTGCAGTGCTAGAGATCTGCAGGGGGCTAGAGAGCAGTACTTCGGGCCG	CSARDLQGAREQYF	63	0.000558704	TCRBV20	TCRBD01-01*01	TCRBJ02-07*01
CAGGTAGTGCGAGGAGATTCGGCAGCTTATTTCTGTGCCAGCTCACCACGCCAGGGGGGATCTAATGAAAAACTGTTTTTTGGCAGT	CASSPRQGGSNEKLFF	63	0.000558704	TCRBV18-01*01	TCRBD01-01*01	TCRBJ01-04*01
CAGCCTGCAGAACTGGAGGATTCTGGAGTTTATTTCTGTGCCAGCAGCCAAAGGGTTAACGGTAATGAAAAACTGTTTTTTGGCAGT	CASSQRVNGNEKLFF	61	0.000540967	TCRBV14-01*01	unknown	TCRBJ01-04*01
AACATGAGCCCTGAAGACAGCAGCATATATCTCTGCAGCGTTGTAAAAAGGGACAGAGTTAACACCGGGGAGCTGTTTTTTGGAGAA	CSVVKRDRVNTGELFF	61	0.000540967	TCRBV29-01*01	TCRBD01-01*01	TCRBJ02-02*01
GCTCCCTCCCAAACATCTGTGTACTTCTGTGCCAGCAGTTACTCGAGTGGGACAGGGGGCCTGAACACTGAAGCTTTCTTTGGACAA	CASSYSSGTGGLNTEAFF	60	0.000532099	TCRBV06	TCRBD01-01*01	TCRBJ01-01*01
ATCCGGTCCACAAAGCTGGAGGACTCAGCCATGTACTTCTGTGCCAGCAGTGGACAGGGGGCGCAATACGAGCAGTACTTCGGGCCG	CASSGQGAQYEQYF	60	0.000532099	TCRBV02-01*01	TCRBD01-01*01	TCRBJ02-07*01
CGCACAGAGCAGGGGGACTCGGCCATGTATCTCTGTGCCAGCAGCTCCTCCCTCGACATCCTCGCCGGGGAGCTGTTTTTTGGAGAA	CASSSSLDILAGELFF	60	0.000532099	TCRBV07-09	TCRBD01-01*01	TCRBJ02-02*01
AACGCCTTGGAGCTGGACGACTCGGCCCTGTATCTCTGTGCCAGCAGCCACTCGGGGGGAGGTAATGAAAAACTGTTTTTTGGCAGT	CASSHSGGGNEKLFF	59	0.000523231	TCRBV05-04*01	TCRBD02-01*01	TCRBJ01-04*01
CTGGAGTCGGCTGCTCCCTCCCAGACATCTGTGTACTTCTGTGCCAGCAGCTCCGGGACAGGGATTTCACCCCTCCACTTTGGGAAC	CASSSGTGISPLHF	59	0.000523231	TCRBV06-01*01	TCRBD01-01*01	TCRBJ01-06*01
CCCTCAGAACCCAGGGACTCAGCTGTGTACTTCTGTGCCAGCAGACCTGACGCCGGGGGGGCGCGCACTGAAGCTTTCTTTGGACAA	CASRPDAGGARTEAFF	58	0.000514362	TCRBV12	TCRBD02-01*01	TCRBJ01-01*01
TCGCCCAGCCCCAACCAGACCTCTCTGTACTTCTGTGCCAGCAGTTTGTGGTATCCCTCCTATAATTCACCCCTCCACTTTGGGAAC	CASSLWYPSYNSPLHF	58	0.000514362	TCRBV27-01*01	unknown	TCRBJ01-06*01
ACTGTGACATCGGCCCAAAAGAACCCGACAGCTTTCTATCTCTGTGCCACCCGGGGGACAGGGGATGAAAAACTGTTTTTTGGCAGT	CATRGTGDEKLFF	58	0.000514362	TCRBV19-01	TCRBD01-01*01	TCRBJ01-04*01
TCGCTCAGGCTGGAGTCGGCTGCTCCCTCCCAGACATCTGTGTACTTCTGTGCCGCCGACAGGGTCTATGGCTACACCTTCGGTTCG	CAADRVYGYTF	57	0.000505494	TCRBV06-01*01	TCRBD01-01*01	TCRBJ01-02*01
GTGACATCGGCCCAAAAGAACCCGACAGCTTTCTATCTCTGTGCCAGTAGAGACGACCCTGGGTGGACTGAAGCTTTCTTTGGACAA	CASRDDPGWTEAFF	57	0.000505494	TCRBV19-01	unknown	TCRBJ01-01*01
CTGGAGTCCGCCAGCACCAACCAGACATCTATGTACCTCTGTGCCAGCACTTTGGGGGTTGGGAACACTGAAGCTTTCTTTGGACAA	CASTLGVGNTEAFF	56	0.000496626	TCRBV28-01*01	unknown	TCRBJ01-01*01
GAGTCTGCCATCCCCAACCAGACAGCTCTTTACTTCTGTGCCACCAGGACGGGGGACAGGGACCTCAGTGAGCAGTTCTTCGGGCCA	CATRTGDRDLSEQFF	56	0.000496626	TCRBV24	TCRBD01-01*01	TCRBJ02-01*01
ATCAATTCCCTGGAGCTTGGTGACTCTGCTGTGTATTTCTGTGCCAGCAGCCTGGCCGGGACTCCCTACGAGCAGTACTTCGGGCCG	CASSLAGTPYEQYF	56	0.000496626	TCRBV03	TCRBD02-01	TCRBJ02-07*01
ATCCAGCCCTCAGAACCCAGGGACTCAGCTGTGTACTTCTGTGCCAGCAGTGGCTCGGACACCGACTACGAGCAGTACTTCGGGCCG	CASSGSDTDYEQYF	55	0.000487757	TCRBV12	TCRBD01-01*01	TCRBJ02-07*01
CTGTCGGCTGCTCCCTCCCAGACATCTGTGTACTTCTGTGCCAGCAGATCCCCGGGACAGGGGAACACTGAAGCTTTCTTTGGACAA	CASRSPGQGNTEAFF	54	0.000478889	TCRBV06-05*01	TCRBD01-01*01	TCRBJ01-01*01
AATTCCCTGGAGCTTGGTGACTCTGCTGTGTATTTCTGTGCCAGCAGCCAAGGGGACAGGGGAGCGTACGAGCAGTACTTCGGGCCG	CASSQGDRGAYEQYF	54	0.000478889	TCRBV03	TCRBD01-01*01	TCRBJ02-07*01
CAGCCCTCAGAACCCAGGGACTCAGCTGTGTACTTCTGTGCCAGCATCTGGGCTACCGTAAACACCGGGGAGCTGTTTTTTGGAGAA	CASIWATVNTGELFF	54	0.000478889	TCRBV12	TCRBD01-01*01	TCRBJ02-02*01
CGCACAGAGCAGCGGGACTCAGCCATGTATCGCTGTGCCAGCAGCTTAGGTCTAGCGGGGGGGTCCCACGAGCAGTACTTCGGGCCG	CASSLGLAGGSHEQYF	53	0.000470021	TCRBV07-07*01	TCRBD02-01*01	TCRBJ02-07*01
CAGCGCACACAGCAGGAGGACTCGGCCGTGTATCTCTGTGCCAGCAGCAGCAGTAGTTCGGAAGGAAACACCATATATTTTGGAGAG	CASSSSSSEGNTIYF	53	0.000470021	TCRBV07-02*01	unknown	TCRBJ01-03*01
TCGCCCAGCCCCAACCAGACCTCTCTGTACTTCTGTGCCAGCAGACGGACAGGGGAGATTGGTAATTCACCCCTCCACTTTGGGAAC	CASRRTGEIGNSPLHF	52	0.000461152	TCRBV27-01*01	TCRBD01-01*01	TCRBJ01-06*01
CTGAAGATCCGGTCCACAAAGCTGGAGGACTCAGCCATGTACTTCTGTGCCAGCAGTGATCCCGGGTTCGGCTACACCTTCGGTTCG	CASSDPGFGYTF	51	0.000452284	TCRBV02-01*01	TCRBD02-01	TCRBJ01-02*01
GTAGTGCGAGGAGATTCGGCAGCTTATTTCTGTGCCAGCTCACCGAAAAACTTCCCGACAGGGAACTATGGCTACACCTTCGGTTCG	CASSPKNFPTGNYGYTF	51	0.000452284	TCRBV18-01*01	TCRBD01-01*01	TCRBJ01-02*01
CTGACAGTGACCAGTGCCCATCCTGAAGACAGCAGCTTCTACATCTGCAGTGCTGCTCGGACAGACACTGAAGCTTTCTTTGGACAA	CSAARTDTEAFF	51	0.000452284	TCRBV20	TCRBD01-01*01	TCRBJ01-01*01
ACAGAGCGGGGGGACTCAGCCGTGTATCTCTGTGCCAGCAGCTTAGGTCCGGCCGGGTCGACTGGAAACACCATATATTTTGGAGAG	CASSLGPAGSTGNTIYF	51	0.000452284	TCRBV07-03*01	TCRBD02-01	TCRBJ01-03*01
CTGGAGTCGCCCAGCCCCAACCAGACCTCTCTGTACTTCTGTGCCAGCAGTCCCCGGTGGGGGACTCACCCCCAGCATTTTGGTGAT	CASSPRWGTHPQHF	49	0.000434547	TCRBV27-01*01	TCRBD02-01	TCRBJ01-05*01
AAGGTGCAGCCTGCAGAACTGGAGGATTCTGGAGTTTATTTCTGTGCCAGCAGCCCTTACCTTAACTCACCCCTCCACTTTGGGAAC	CASSPYLNSPLHF	49	0.000434547	TCRBV14-01*01	unknown	TCRBJ01-06*01
CAGCCAGAAGACTCGGCCCTGTATCTCTGTGCCAGCAGCCTCGGAGGGATAGCGGGGGCTGGCTCCTACGAGCAGTACTTCGGGCCG	CASSLGGIAGAGSYEQYF	48	0.000425679	TCRBV04-02*01	TCRBD02-01*01	TCRBJ02-07*01
ACAGAGCAGGGGGACTCGGCCATGTATCTCTGTGCCAGCAGCTTAGTTGGACAGGGGGCGTCTAACTATGGCTACACCTTCGGTTCG	CASSLVGQGASNYGYTF	48	0.000425679	TCRBV07-09	TCRBD01-01*01	TCRBJ01-02*01
AATGCCTTGGAGCTGGAGGACTCGGCCCTGTATCTCTGTGCCAGCAGCTTGTTCGGAGCCCCTGAGACTGAAGCTTTCTTTGGACAA	CASSLFGAPETEAFF	48	0.000425679	TCRBV05-08*01	TCRBD02-01*02	TCRBJ01-01*01
GTGAGCACCTTGGAGCTGGGGGACTCGGCCCTTTATCTTTGCGCCAGCAGCAGGACAGGGGAGGTCTACGAGCAGTACTTCGGGCCG	CASSRTGEVYEQYF	48	0.000425679	TCRBV05-01*01	TCRBD01-01*01	TCRBJ02-07*01
CTGCAGCCAGAAGACTCGGCCCTGTATCTCTGCGCCAGCAGCCCAAGAGAGGGGTTCACGGGGGGCAATGAGCAGTTCTTCGGGCCA	CASSPREGFTGGNEQFF	48	0.000425679	TCRBV04-03*01	TCRBD02-01*01	TCRBJ02-01*01
CGCACAGAGCAGGGGGACTCGGCCATGTATCTCTGTGCCAGCAGCTTGGGAAGCGGGGGGACCACCGGGGAGCTGTTTTTTGGAGAA	CASSLGSGGTTGELFF	47	0.000416811	TCRBV07-09	TCRBD02-01*01	TCRBJ02-02*01
CAGCCAGAAGACTCGGCCCTGTATCTCTGCGCCAGCAGCCCGGGACTAGCGGGGGGCCCGGACACCGGGGAGCTGTTTTTTGGAGAA	CASSPGLAGGPDTGELFF	47	0.000416811	TCRBV04-03*01	TCRBD02-01*01	TCRBJ02-02*01
ACTCTGACAGTGACCAGTGCCCATCCTGAAGACAGCAGCTTCTACATCTGCAGTTTGAGGACAGTGTATGGCTACACCTTCGGTTCG	CSLRTVYGYTF	47	0.000416811	TCRBV20-01*01	TCRBD01-01*01	TCRBJ01-02*01
CGCACACAGCAGGAGGACTCGGCCGTGTATCTCTGTGCCAGCAGCTTAGCCCCTGGAGCGCCGGGTGGGGAGCAGTACTTCGGGCCG	CASSLAPGAPGGEQYF	46	0.000407942	TCRBV07-02*01	TCRBD02-01	TCRBJ02-07*01
CTGGAGTTGGCTGCTCCCTCCCAGACATCTGTGTACTTCTGTGCCAGCAGGAAGGAGGGGCCTAACACTGAAGCTTTCTTTGGACAA	CASRKEGPNTEAFF	46	0.000407942	TCRBV06-06	TCRBD02-01*02	TCRBJ01-01*01
ATCCAGCGCACAGAGCAGGGGGACTCGGCCATGTATCTCTGTGCCAGCAGCCCCGTCTCTGGGGCCAACGTCCTGACTTTCGGGGCC	CASSPVSGANVLTF	46	0.000407942	TCRBV07-09	TCRBD02-01	TCRBJ02-06*01
ACATCGGCCCAAAAGAACCCGACAGCTTTCTATCTCTGTGCCAGTAGTCATACAGGAGGGGGGAACTATGGCTACACCTTCGGTTCG	CASSHTGGGNYGYTF	45	0.000399074	TCRBV19-01	unknown	TCRBJ01-02*01
GCCCATCCTGAAGACAGCAGCTTCTACATCTGCAGTGCTAGTGGGCCCCCCGGGCAGGGTAAAACCGGGGAGCTGTTTTTTGGAGAA	CSASGPPGQGKTGELFF	45	0.000399074	TCRBV20	TCRBD01-01*01	TCRBJ02-02*01
GAGATGAATGTGAGCACCTTGGAGCTGGGGGACTCGGCCCTTTATCTTTGCGCCAGCCAGGAGCATGACGAGCAGTACTTCGGGCCG	CASQEHDEQYF	45	0.000399074	TCRBV05-01*01	unknown	TCRBJ02-07*01
CACATCAATTCCCTGGAGCTTGGTGACTCTGCTGTGTATTTCTGTGCCAGCAGCAAACAAAGCACAGATACGCAGTATTTTGGCCCA	CASSKQSTDTQYF	45	0.000399074	TCRBV03	TCRBD01-01*01	TCRBJ02-03*01
ACAGTGACCAGTGCCCATCCTGAAGACAGCAGCTTCTACATCTGCAGTGCTAGGACGGGGGGCCGTCAGCCCCAGCATTTTGGTGAT	CSARTGGRQPQHF	44	0.000390206	TCRBV20	TCRBD02-01*01	TCRBJ01-05*01
CTGAAGGTGCAGCCTGCAGAACTGGAGGATTCTGGAGTTTATTTCTGTGCCAGCAGCCACAGGGGAAACACCATATATTTTGGAGAG	CASSHRGNTIYF	44	0.000390206	TCRBV14-01*01	TCRBD01-01*01	TCRBJ01-03*01
GTGACCAGTGCCCATCCTGAAGACAGCAGCTTCTACATCTGCAGTGCCAGTCGCCAGGGTCGCAATCAGCCCCAGCATTTTGGTGAT	CSASRQGRNQPQHF	44	0.000390206	TCRBV20	TCRBD01-01*01	TCRBJ01-05*01
ACAGAGCAGGGGGACTCAGCTGTGTATCTCTGTGCCAGCAGCTTAGCGCTAAATTGTCGCCCCTCCTACGAGCAGTACTTCGGGCCG	CASSLALNCRPSYEQYF	44	0.000390206	TCRBV07-04*01	TCRBD02-01	TCRBJ02-07*01
TCGGCTGCTCCCTCCCAGACATCTGTGTACTTCTGTGCCAGCAGTTATGTCAGGACAGGGGGCAACTATGGCTACACCTTCGGTTCG	CASSYVRTGGNYGYTF	44	0.000390206	TCRBV06-05*01	TCRBD01-01*01	TCRBJ01-02*01
CGCTCACCAGGCCTGGGGGACGCAGCCATGTACCTGTGTGCCACCAGCACCGGCCCAGGGAGCAATCAGCCCCAGCATTTTGGTGAT	CATSTGPGSNQPQHF	43	0.000381338	TCRBV15-01*01	TCRBD01-01*01	TCRBJ01-05*01
AGCACCTTGGAGCTGGGGGACTCGGCCCTTTATCTTTGCGCCAGCAGCTTGGGGACTTACGCGAACTATGGCTACACCTTCGGTTCG	CASSLGTYANYGYTF	43	0.000381338	TCRBV05-01*01	TCRBD02-01	TCRBJ01-02*01
AAGATCCAGCCCTCAGAACCCAGGGACTCAGCTGTGTACTTCTGTGCCAGCAGTCCCCATAGGACGGGTGAAGCTTTCTTTGGACAA	CASSPHRTGEAFF	43	0.000381338	TCRBV12	unknown	TCRBJ01-01*01
GTGAGTGCCTTGGAGCTGGGGGACTCGGCCCTGTATCTCTGTGCCAGAAGCTGCCGGGACAGGATCTCCGAGCAGTACTTCGGGCCG	CARSCRDRISEQYF	43	0.000381338	TCRBV05-03	TCRBD01-01*01	TCRBJ02-07*01
CTTGACATCCGCTCACCAGGCCTGGGGGACGCAGCCATGTACCTGTGTGCCACCAGCAGAGATTGGGAGACCCAGTACTTCGGGCCA	CATSRDWETQYF	42	0.000372469	TCRBV15-01*01	unknown	TCRBJ02-05*01
AACGCCTTGGAGCTGGACGACTCGGCCCTGTATCTCTGTGCCAGCAGCCGCGTTGGCGGGGGGGCCTACGAGCAGTACTTCGGGCCG	CASSRVGGGAYEQYF	42	0.000372469	TCRBV05-04*01	TCRBD02-01*01	TCRBJ02-07*01
GCAGAACTGGAGGATTCTGGAGTTTATTTCTGTGCCAGCAGCCCCAGATTTTCGGGGACAGGGGTCCACGAGCAGTACTTCGGGCCG	CASSPRFSGTGVHEQYF	42	0.000372469	TCRBV14-01*01	TCRBD01-01*01	TCRBJ02-07*01
CTGACAGTGACCAGTGCCCATCCTGAAGACAGCAGCTTCTACATCTGCAGTGCTAGAGATCTTTCAGATACGCAGTATTTTGGCCCA	CSARDLSDTQYF	42	0.000372469	TCRBV20	TCRBD02-01	TCRBJ02-03*01
ACATCGGCCCAAAAGAACCCGACAGCTTTCTATCTCTGTGCCAGTAGTATAGCGGGGGGGCACACCGGGGAGCTGTTTTTTGGAGAA	CASSIAGGHTGELFF	41	0.000363601	TCRBV19-01	TCRBD02-01*01	TCRBJ02-02*01
CTGTCGGCTGCTCCCTCCCAGACATCTGTGTACTTCTGTGCCAGCGCTTGGTTGCAGGGTCGGAGCACTGAAGCTTTCTTTGGACAA	CASAWLQGRSTEAFF	41	0.000363601	TCRBV06-05*01	TCRBD01-01*01	TCRBJ01-01*01
CTGACGATCCAGCGCACACAGCAGGAGGACTCGGCCGTGTATCTCTGTGCCAGCAGCACAACCGCAGATACGCAGTATTTTGGCCCA	CASSTTADTQYF	41	0.000363601	TCRBV07-02*01	TCRBD01-01*01	TCRBJ02-03*01
GGGTTGGAGTCGGCTGCTCCCTCCCAAACATCTGTGTACTTCTGTGCCAGCAGTCTCCCGCTAGGGCTCGAGCAGTACTTCGGGCCG	CASSLPLGLEQYF	41	0.000363601	TCRBV06	unknown	TCRBJ02-07*01
CAGCCTGCAAAGCTTGAGGACTCGGCCGTGTATCTCTGTGCCAGCAGCTTAGGAGCTTCTGTCTCCTACGAGCAGTACTTCGGGCCG	CASSLGASVSYEQYF	40	0.000354733	TCRBV11-02*02	TCRBD02-01	TCRBJ02-07*01
CAGCCCTCAGAACCCAGGGACTCAGCTGTGTACTTCTGTGCCAGCCATAGAGCCGGGATACATGGCGATGGCTACACCTTCGGTTCG	CASHRAGIHGDGYTF	40	0.000354733	TCRBV12	TCRBD02-01*02	TCRBJ01-02*01
CTGGAGTCCGCCAGCACCAACCAGACATCTATGTACCTCTGTGCCAGCAGATCAGACCTTACGGGCACTGAAGCTTTCTTTGGACAA	CASRSDLTGTEAFF	40	0.000354733	TCRBV28-01*01	TCRBD02-01	TCRBJ01-01*01
CAGTCCACGGAGTCAGGGGACACAGCACTGTATTTCTGTGCCAGCAGCAAACAGGGACAGGGGCACTATGGCTACACCTTCGGTTCG	CASSKQGQGHYGYTF	40	0.000354733	TCRBV21-01*01	TCRBD01-01*01	TCRBJ01-02*01
ATCCGGTCCACAAAGCTGGAGGACTCAGCCATGTACTTCTGTGCCAGCAGTGGAGGGGTTATTAATGAAAAACTGTTTTTTGGCAGT	CASSGGVINEKLFF	39	0.000345864	TCRBV02-01*01	unknown	TCRBJ01-04*01
ACCAGTGCCCATCCTGAAGACAGCAGCTTCTACATCTGCAGTGCTAGATTATGGGAGGGGGGGGACCACGAGCAGTACTTCGGGCCG	CSARLWEGGDHEQYF	39	0.000345864	TCRBV20	TCRBD02-01	TCRBJ02-07*01
CAGCCCTCAGAACCCAGGGACTCAGCTGTGTACTTCTGTGCCAGCAGGGTAGGGGACAGGCTGAACACTGAAGCTTTCTTTGGACAA	CASRVGDRLNTEAFF	39	0.000345864	TCRBV12	TCRBD01-01*01	TCRBJ01-01*01
CTACACACCCTGCAGCCAGAAGACTCGGCCCTGTATCTCTGTGCCAGCAGCCAAGGGACAGGGCAAAACATTCAGTACTTCGGCGCC	CASSQGTGQNIQYF	38	0.000336996	TCRBV04-02*01	TCRBD01-01*01	TCRBJ02-04*01
CGGTCCACAAAGCTGGAGGACTCAGCCATGTACTTCTGTGCCAGCAGTGACCGGACCGGGGGGGATCAGCCCCAGCATTTTGGTGAT	CASSDRTGGDQPQHF	38	0.000336996	TCRBV02-01*01	TCRBD02-01*01	TCRBJ01-05*01
TCGGCCCAAAAGAACCCGACAGCTTTCTATCTCTGTGCCAGTAGTATGGTAGGGACAGGGGACACCGGGGAGCTGTTTTTTGGAGAA	CASSMVGTGDTGELFF	38	0.000336996	TCRBV19-01	TCRBD01-01*01	TCRBJ02-02*01
AACCTGAGCTCTCTGGAGCTGGGGGACTCAGCTTTGTATTTCTGTGCCAGCAGCGTAGAGGCCAGTTACGAGCAGTACTTCGGGCCG	CASSVEASYEQYF	38	0.000336996	TCRBV09-01	unknown	TCRBJ02-07*01
CAGCCCTCAGAACCCAGGGACTCAGCTGTGTACTTCTGTGCCAGCAGTTTACCAGGGTTGACCACCGGGGAGCTGTTTTTTGGAGAA	CASSLPGLTTGELFF	37	0.000328128	TCRBV12	TCRBD01-01*01	TCRBJ02-02*01
ATCCAGCGCACACAGCAGGAGGACTCCGCCGTGTATCTCTGTGCCAGCGTTAACCTTGGGCCTGTAAAGACCCAGTACTTCGGGCCA	CASVNLGPVKTQYF	37	0.000328128	TCRBV07-08*01	TCRBD01-01*01	TCRBJ02-05*01
CTTCACATCAATTCCCTGGAGCTTGGTGACTCTGCTGTGTATTTCTGTGCCAGCAGCCGAAGGGGGCACGAGCAGTACTTCGGGCCG	CASSRRGHEQYF	37	0.000328128	TCRBV03	TCRBD01-01*01	TCRBJ02-07*01
ATCCAGCCCTCAGAACCCAGGGACTCAGCTGTGTACTTCTGTGCCAGCAGTCCAGGGCTCTCTGGAAACACCATATATTTTGGAGAG	CASSPGLSGNTIYF	37	0.000328128	TCRBV12	TCRBD01-01*01	TCRBJ01-03*01
TCCCTGGAGCTTGGTGACTCTGCTGTGTATTTCTGTGCCAGCAGCCAAGACAGACTAGCGGGGGGGGAGACCCAGTACTTCGGGCCA	CASSQDRLAGGETQYF	37	0.000328128	TCRBV03	TCRBD02-01*01	TCRBJ02-05*01
CTGAGCTCTCTGGAGCTGGGGGACTCAGCTTTGTATTTCTGTGCCAGCAGCGTAGGGGACAGCGGCGGGGAGCTGTTTTTTGGAGAA	CASSVGDSGGELFF	37	0.000328128	TCRBV09-01	TCRBD01-01*01	TCRBJ02-02*01
ATGAGCTCCTTGGAGCTGGGGGACTCAGCCCTGTACTTCTGTGCCAGCAGCTTAGGTGGGACTTGGGGCGAGCAGTACTTCGGGCCG	CASSLGGTWGEQYF	37	0.000328128	TCRBV13-01*01	TCRBD02-01	TCRBJ02-07*01
AATGTGAGCACCTTGGAGCTGGGGGACTCGGCCCTTTATCTTTGCGCCAGCAGCTTGGGCCAACTGAATGAGCAGTTCTTCGGGCCA	CASSLGQLNEQFF	37	0.000328128	TCRBV05-01*01	TCRBD02-01	TCRBJ02-01*01
ACAGTGACCAGTGCCCATCCTGAAGACAGCAGCTTCTACATCTGCAGTGCTAGAGCTAGTCAGGTGAAAAGCTACACCTTCGGTTCG	CSARASQVKSYTF	36	0.000319259	TCRBV20	unknown	TCRBJ01-02*01
GTGACCAGTGCCCATCCTGAAGACAGCAGCTTCTACATCTGCAGTGCTCCCCCTGGGGGGCGAAGTGAAAAACTGTTTTTTGGCAGT	CSAPPGGRSEKLFF	36	0.000319259	TCRBV20	unknown	TCRBJ01-04*01
GTGACCAGTGCCCATCCTGAAGACAGCAGCTTCTACATCTGCAGTGCTAAGGACAGGGGGGTGGATTCACCCCTCCACTTTGGGAAC	CSAKDRGVDSPLHF	36	0.000319259	TCRBV20	TCRBD01-01*01	TCRBJ01-06*01
GTGAACGCCTTGTTGCTGGGGGACTCGGCCCTCTATCTCTGTGCCAGCAGCTCAACCAATCTGAACACTGAAGCTTTCTTTGGACAA	CASSSTNLNTEAFF	36	0.000319259	TCRBV05-06*01	unknown	TCRBJ01-01*01
AGCTCTCTGGAGCTGGGGGACTCAGCTTTGTATTTCTGTGCCAGCAGCGTAGGTTGGGGGGCGAACACTGAAGCTTTCTTTGGACAA	CASSVGWGANTEAFF	36	0.000319259	TCRBV09-01	unknown	TCRBJ01-01*01
AAGATCCAGCCCTCAGAACCCAGGGACTCAGCTGTGTACTTCTGTGCCAGCAGAAGGGATAGCAATCAGCCCCAGCATTTTGGTGAT	CASRRDSNQPQHF	36	0.000319259	TCRBV12	unknown	TCRBJ01-05*01
CGCTCACCAGGCCTGGGGGACGCAGCCATGTACCTGTGTGCCACCAGCAGAGGTTCGGGGGGATTGACTGAAGCTTTCTTTGGACAA	CATSRGSGGLTEAFF	36	0.000319259	TCRBV15-01*01	TCRBD02-01*01	TCRBJ01-01*01
GTGACCAGTGCCCATCCTGAAGACAGCAGCTTCTACATCTGCAGTGCTAGAGATCAGGGGGTCTTAAATGAAGCTTTCTTTGGACAA	CSARDQGVLNEAFF	35	0.000310391	TCRBV20	TCRBD01-01*01	TCRBJ01-01*01
CAGCCTGCAAAGCTTGAGGACTCGGCCGTGTATCTCTGTGCCAGCAGCTTAGCTCCGGGTCAGAATTCACCCCTCCACTTTGGGAAC	CASSLAPGQNSPLHF	35	0.000310391	TCRBV11-02*02	TCRBD02-01	TCRBJ01-06*01
CTGAAGATCCGGTCCACAAAGCTGGAGGACTCAGCCATGTACTTCTGTGCCAGTTCTTGGACAGGGAATGGCTACACCTTCGGTTCG	CASSWTGNGYTF	35	0.000310391	TCRBV02-01*01	TCRBD01-01*01	TCRBJ01-02*01
GCTGCTCCCTCCCAGACATCTGTGTACTTCTGTGCCAGCAGTGGCCGGACTAGCGGGGGGGCAATAGATACGCAGTATTTTGGCCCA	CASSGRTSGGAIDTQYF	35	0.000310391	TCRBV06-01*01	TCRBD02-01*01	TCRBJ02-03*01
AGTGCCCATCCTGAAGACAGCAGCTTCTACATCTGCAGTGCTAGTTACGGGACAGCTACTAGCACAGATACGCAGTATTTTGGCCCA	CSASYGTATSTDTQYF	35	0.000310391	TCRBV20	TCRBD01-01*01	TCRBJ02-03*01
GAGTTGGCTGCTCCCTCCCAGACATCTGTGTACTTCTGTGCCAGCCGGGAGGGACAGGGGGATAACTATGGCTACACCTTCGGTTCG	CASREGQGDNYGYTF	34	0.000301523	TCRBV06-06	TCRBD01-01*01	TCRBJ01-02*01
GCCCTGCAGCCAGAAGACTCAGCCCTGTATCTCTGCGCCAGCAGCCAAGCACCGACAGGGGTCACCGGGGAGCTGTTTTTTGGAGAA	CASSQAPTGVTGELFF	34	0.000301523	TCRBV04-01*01	TCRBD01-01*01	TCRBJ02-02*01
TTGGAGATCCAGCGCACAGAGCAGGGGGACTCGGCCATGTATCTCTGTGCCAGCAGCTTAACAAGCGGTGAGCAGTTCTTCGGGCCA	CASSLTSGEQFF	34	0.000301523	TCRBV07-09	TCRBD02-01	TCRBJ02-01*01
ACCAACCAGACATCTATGTACCTCTGTGCCAGCAGTCCCACGCGACAGCGGGGGGGTTGGCCGTACAATGAGCAGTTCTTCGGGCCA	CASSPTRQRGGWPYNEQFF	34	0.000301523	TCRBV28-01*01	TCRBD02-01*01	TCRBJ02-01*01
ACCAGTGCCCATCCTGAAGACAGCAGCTTCTACATCTGCAGTGCTATTCCCGGGACAGGGATGAACACTGAAGCTTTCTTTGGACAA	CSAIPGTGMNTEAFF	33	0.000292654	TCRBV20	TCRBD01-01*01	TCRBJ01-01*01
GAGTCCGCTACCAGCTCCCAGACATCTGTGTACTTCTGTGCCATCAGGGGAGGTGGGGGCGGCACCGGGGAGCTGTTTTTTGGAGAA	CAIRGGGGGTGELFF	33	0.000292654	TCRBV10-03*01	unknown	TCRBJ02-02*01
ATCCAGCCCTCAGAACCCAGGGACTCAGCTGTGTACTTCTGTGCCAGCAGTTCGCCCATTGAACGGCATGGCTACACCTTCGGTTCG	CASSSPIERHGYTF	33	0.000292654	TCRBV12	unknown	TCRBJ01-02*01
AGTGCCCATCCTGAAGACAGCAGCTTCTACATCTGCAGTGCTAGGCCTGTGGGCCCCGTCCTCAATCAGCCCCAGCATTTTGGTGAT	CSARPVGPVLNQPQHF	32	0.000283786	TCRBV20	TCRBD01-01*01	TCRBJ01-05*01
CAGCGCACACAGCAGGAGGACTCGGCCGTGTATCTCTGTGCCAGCAGCCCCACAGGACCGGTTAATTCACCCCTCCACTTTGGGAAC	CASSPTGPVNSPLHF	32	0.000283786	TCRBV07-02*01	TCRBD01-01*01	TCRBJ01-06*01
TCCCTGGAGCTTGGTGACTCTGCTGTGTATTTCTGTGCCAGCAGCCCTTGGAGCGGGGGGGCGAAAAACGAGCAGTACTTCGGGCCG	CASSPWSGGAKNEQYF	32	0.000283786	TCRBV03	TCRBD02-01*01	TCRBJ02-07*01
TTGTTGCTGGGGGACTCGGCCCTCTATCTCTGTGCCAGCAGCTTGGGGGGACAATGGACGGTGGATTCACCCCTCCACTTTGGGAAC	CASSLGGQWTVDSPLHF	32	0.000283786	TCRBV05-06*01	TCRBD01-01*01	TCRBJ01-06*01
CGCTCACCAGGCCTGGGGGACGCAGCCATGTACCTGTGTGCCACCAGCAGAGATCCGGGTAGCAATCAGCCCCAGCATTTTGGTGAT	CATSRDPGSNQPQHF	32	0.000283786	TCRBV15-01*01	TCRBD02-01	TCRBJ01-05*01
ATCCGGTCCACAAAGCTGGAGGACTCAGCCATGTACTTCTGTGCCAGCAGTGTTCAGCTTAGCAATCAGCCCCAGCATTTTGGTGAT	CASSVQLSNQPQHF	32	0.000283786	TCRBV02-01*01	unknown	TCRBJ01-05*01
CAGCCTGCAAAGCTTGAGGACTCGGCCGTGTATCTCTGTGCCAGCAGCTTAGCCCAGGGACATAATTCACCCCTCCACTTTGGGAAC	CASSLAQGHNSPLHF	32	0.000283786	TCRBV11-02*02	unknown	TCRBJ01-06*01
ACCAGTGCCCATCCTGAAGACAGCAGCTTCTACATCTGCAGTGCTAGGGCCTTAGCGGGGGACTCCTACGAGCAGTACTTCGGGCCG	CSARALAGDSYEQYF	32	0.000283786	TCRBV20	TCRBD02-01*01	TCRBJ02-07*01
CAGCCTGCAAAGCTTGAGGACTCGGCCGTGTATCTCTGTGCCAGCGGGGGAAGAGGGCGACTTGCCTACGAGCAGTACTTCGGGCCG	CASGGRGRLAYEQYF	31	0.000274918	TCRBV11-02*02	unknown	TCRBJ02-07*01
CGGTCCACAAAGCTGGAGGACTCAGCCATGTACTTCTGTGCCAGCAGTGAGGGCAGGGGGCATTACTATGGCTACACCTTCGGTTCG	CASSEGRGHYYGYTF	31	0.000274918	TCRBV02-01*01	TCRBD01-01*01	TCRBJ01-02*01
AATGTGAGCACCTTGGAGCTGGGGGACTCGGCCCTTTATCTTTGCGCCAGCAGCTTACAGGGGGCCAATGGCTACACCTTCGGTTCG	CASSLQGANGYTF	31	0.000274918	TCRBV05-01*01	TCRBD01-01*01	TCRBJ01-02*01
CTGAGCTCTCTGGAGCTGGGGGACTCAGCTTTGTATTTCTGTGCCAGCAGCACCGCGGGGGGGCCTAGAGAGCAGTACTTCGGGCCG	CASSTAGGPREQYF	31	0.000274918	TCRBV09-01	TCRBD02-01*01	TCRBJ02-07*01
GTGACCAGTGCCCATCCTGAAGACAGCAGCTTCTACATCTGCAGTGCCAGGAGGGGGGGCTCCTACAATGAGCAGTTCTTCGGGCCA	CSARRGGSYNEQFF	31	0.000274918	TCRBV20	TCRBD02-01*01	TCRBJ02-01*01
GTGCAGCCTGCAGAACTGGAGGATTCTGGAGTTTATTTCTGTGCCAGCAGCTCCCTGGGAGGGGCTAGCGGCTACACCTTCGGTTCG	CASSSLGGASGYTF	31	0.000274918	TCRBV14-01*01	TCRBD02-01*02	TCRBJ01-02*01
ACTCTGACAGTGACCAGTGCCCATCCTGAAGACAGCAGCTTCTACATCTGCAGTGCTACCAACCTCAATGAGCAGTTCTTCGGGCCA	CSATNLNEQFF	31	0.000274918	TCRBV20-01*01	unknown	TCRBJ02-01*01
AAGATCCAGCGCACACAGCAGGAGGACTCCGCCGTGTATCTCTGTGCCAGCAGACCGGACAGAAACACTGAAGCTTTCTTTGGACAA	CASRPDRNTEAFF	30	0.000266049	TCRBV07-08*01	TCRBD01-01*01	TCRBJ01-01*01
ATCCAGCCCTCAGAACCCAGGGACTCAGCTGTGTACTTCTGTGCCAGCAGTCGGACAGGCCTGGGCTACGAGCAGTACTTCGGGCCG	CASSRTGLGYEQYF	30	0.000266049	TCRBV12	TCRBD01-01*01	TCRBJ02-07*01
GTGACATCGGCCCAAAAGAACCCGACAGCTTTCTATCTCTGTGCCAGAAACGGGGACAGGGTTACCTATGGCTACACCTTCGGTTCG	CARNGDRVTYGYTF	30	0.000266049	TCRBV19-01	TCRBD01-01*01	TCRBJ01-02*01
TTGGAGCTGGGGGACTCGGCCCTTTATCTTTGCGCCAGCAGCTTGTTGCAGGGCAAAGGCAAAAATTCACCCCTCCACTTTGGGAAC	CASSLLQGKGKNSPLHF	30	0.000266049	TCRBV05-01*01	TCRBD01-01*01	TCRBJ01-06*01
GTGAGCACCTTGGAGCTGGGGGACTCGGCCCTTTATCTTTGCGCCAGCAGTGACCGCGGGGGGGTCGCTACGCAGTATTTTGGCCCA	CASSDRGGVATQYF	30	0.000266049	TCRBV05-01*01	TCRBD02-01*01	TCRBJ02-03*01
AAGATCCAGCGCACAGAGCGGGGGGACTCAGCCGTGTATCTCTGTGCCAGCAGCAATTCCGGGACAGTGCAGCAGTACTTCGGGCCG	CASSNSGTVQQYF	30	0.000266049	TCRBV07-03*01	TCRBD01-01*01	TCRBJ02-07*01
CACGCCCTGCAGCCAGAAGACTCAGCCCTGTATCTCTGCGCCAGCAGCCTTGGGACAGGCCTTAATTCACCCCTCCACTTTGGGAAC	CASSLGTGLNSPLHF	30	0.000266049	TCRBV04-01*01	TCRBD01-01*01	TCRBJ01-06*01
AGGCTGCTGTCGGCTGCTCCCTCCCAGACATCTGTGTACTTCTGTGCCAGCAGTTCTTTTCAGGGCACTGAAGCTTTCTTTGGACAA	CASSSFQGTEAFF	30	0.000266049	TCRBV06-05*01	TCRBD01-01*01	TCRBJ01-01*01
ACTGTGACATCGGCCCAAAAGAACCCGACAGCTTTCTATCTCTGTGCCAGTAGTATAGTGTTGCGGGATGAGCAGTTCTTCGGGCCA	CASSIVLRDEQFF	30	0.000266049	TCRBV19-01	TCRBD02-01	TCRBJ02-01*01
CAGCCTGCAAAGCTTGAGGACTCGGCCGTGTATCTCTGTGCCAGCAGCTTAGGGTTAGGGGAGAACTATGGCTACACCTTCGGTTCG	CASSLGLGENYGYTF	30	0.000266049	TCRBV11-02*02	unknown	TCRBJ01-02*01
GTGAGCACCTTGGAGCTGGGGGACTCGGCCCTTTATCTTTGCGCCAGCAGCCCCGCGGGGGCGGGGGAGACCCAGTACTTCGGGCCA	CASSPAGAGETQYF	30	0.000266049	TCRBV05-01*01	TCRBD02-01*01	TCRBJ02-05*01
ACCAGTGCCCATCCTGAAGACAGCAGCTTCTACATCTGCAGTGCGGAGCCCGCCACGGGAAGCTCCTACGAGCAGTACTTCGGGCCG	CSAEPATGSSYEQYF	29	0.000257181	TCRBV20	TCRBD02-01*02	TCRBJ02-07*01
CTGGAGTCGGCTGCTCCCTCCCAGACATCTGTGTACTTCTGTGCCAGCAGTGCAGACAGGCCCCCGCTGCCCCAGCATTTTGGTGAT	CASSADRPPLPQHF	29	0.000257181	TCRBV06-01*01	TCRBD01-01*01	TCRBJ01-05*01
CTGAAGATCCAGCCCTCAGAACCCAGGGACTCAGCTGTGTACTTCTGTGCCAGCAGTTGGGGGAATGAAAAACTGTTTTTTGGCAGT	CASSWGNEKLFF	29	0.000257181	TCRBV12	unknown	TCRBJ01-04*01
CTGGAGTCGCCCAGCCCCAACCAGACCTCTCTGTACTTCTGTGCCAGCAGTTGGGGGGGCGTGCGGTACGAGCAGTACTTCGGGCCG	CASSWGGVRYEQYF	29	0.000257181	TCRBV27-01*01	TCRBD02-01*01	TCRBJ02-07*01
AGCACCTTGGAGCTGGGGGACTCGGCCCTTTATCTTTGCGCCAGCAGCTTTAACAGGGTTGGTGGCACTGAAGCTTTCTTTGGACAA	CASSFNRVGGTEAFF	29	0.000257181	TCRBV05-01*01	TCRBD01-01*01	TCRBJ01-01*01
GAGCTTGGTGACTCTGCTGTGTATTTCTGTGCCAGCAGCCCATGGACTAGCGGGGGGGGGTATCAAGAGACCCAGTACTTCGGGCCA	CASSPWTSGGGYQETQYF	29	0.000257181	TCRBV03	TCRBD02-01*01	TCRBJ02-05*01
GAGTCGGCTGCTCCCTCCCAGACATCTGTGTACTTCTGTGCCAGCATCATCTCGGCCACCTCCTACAATGAGCAGTTCTTCGGGCCA	CASIISATSYNEQFF	29	0.000257181	TCRBV06-01*01	unknown	TCRBJ02-01*01
AAGATCCAGCGCACACAGCAGGAGGACTCCGCCGTGTATCTCTGTGCCAGCAGCTTATCGGGCCCCGCCGAGCAGTACTTCGGGCCG	CASSLSGPAEQYF	29	0.000257181	TCRBV07-08*01	unknown	TCRBJ02-07*01
CACATCAATTCCCTGGAGCTTGGTGACTCTGCTGTGTATTTCTGTGCCACAGGGGGGGGACTCACAGATACGCAGTATTTTGGCCCA	CATGGGLTDTQYF	29	0.000257181	TCRBV03	unknown	TCRBJ02-03*01
CAGCGCACACAGCAGGAGGACTCGGCCGTGTATCTCTGTGCCAGCACCTCTCTTGGGACTAGCGTTAGTGAGCAGTACTTCGGGCCG	CASTSLGTSVSEQYF	29	0.000257181	TCRBV07-02*01	TCRBD02-01	TCRBJ02-07*01
CACGCCCTGCAGCCAGAAGACTCAGCCCTGTATCTCTGCGCCAGCAGCCAAGCTGCGACTAGCGGCTACGAGCAGTACTTCGGGCCG	CASSQAATSGYEQYF	29	0.000257181	TCRBV04-01*01	TCRBD02-01	TCRBJ02-07*01
ACGTTGGCGTCTGCTGTACCCTCTCAGACATCTGTGTACTTCTGTGCCAGCAGTGACGGGACCACAGATACGCAGTATTTTGGCCCA	CASSDGTTDTQYF	29	0.000257181	TCRBV06-04	unknown	TCRBJ02-03*01
AACGCCTTGTTGCTGGGGGACTCGGCCCTGTATCTCTGTGCCAGCAGCCCTCAGTACAGGGATCCCTACGAGCAGTACTTCGGGCCG	CASSPQYRDPYEQYF	29	0.000257181	TCRBV05-05*01	TCRBD01-01*01	TCRBJ02-07*01
AATTCCCTGGAGCTTGGTGACTCTGCTGTGTATTTCTGTGCCAGCAGCCACGTCCGGGCAACTGGAAACACCATATATTTTGGAGAG	CASSHVRATGNTIYF	28	0.000248313	TCRBV03	unknown	TCRBJ01-03*01
AACCTGAGCTCTCTGGAGCTGGGGGACTCAGCTTTGTATTTCTGTGCCATCGACCTTGGGGGGAACACTGAAGCTTTCTTTGGACAA	CAIDLGGNTEAFF	28	0.000248313	TCRBV09-01	unknown	TCRBJ01-01*01
CTGAAGATCCAGCCCTCAGAACCCAGGGACTCAGCTGTGTACTTCTGTGCCAGCAGTTTAGCGCGCTCGATTCAGTACTTCGGCGCC	CASSLARSIQYF	28	0.000248313	TCRBV12	TCRBD02-01	TCRBJ02-04*01
ATCCTGGAGTCGCCCAGCCCCAACCAGACCTCTCTGTACTTCTGTGCCAGCAGTTTAGAGGGACAACAGCCCCAGCATTTTGGTGAT	CASSLEGQQPQHF	28	0.000248313	TCRBV27-01*01	TCRBD01-01*01	TCRBJ01-05*01
AGGCTGCTGTCGGCTGCTCCCTCCCAGACATCTGTGTACTTCTGTGCCAGCGGGGACAGAAGCAATCAGCCCCAGCATTTTGGTGAT	CASGDRSNQPQHF	28	0.000248313	TCRBV06-05*01	TCRBD01-01*01	TCRBJ01-05*01
CACATCAATTCCCTGGAGCTTGGTGACTCTGCTGTGTATTTCTGTGCCAGCAGCCAAGGGGGGAATCAGCCCCAGCATTTTGGTGAT	CASSQGGNQPQHF	28	0.000248313	TCRBV03	unknown	TCRBJ01-05*01
GTGAACGCCTTGTTGCTGGGGGACTCGGCCCTCTATCTCTGTGCCAGCAGCTACGGACAGGGTAGGGAGACCCAGTACTTCGGGCCA	CASSYGQGRETQYF	28	0.000248313	TCRBV05-06*01	TCRBD01-01*01	TCRBJ02-05*01
CTGACAGTGACCAGTGCCCATCCTGAAGACAGCAGCTTCTACATCTGCAGTGCTGGACACCTACCTTATGGCTACACCTTCGGTTCG	CSAGHLPYGYTF	28	0.000248313	TCRBV20	TCRBD01-01*01	TCRBJ01-02*01
ATCAATTCCCTGGAGCTTGGTGACTCTGCTGTGTATTTCTGTGCCAGCAGCTTTAGCCAGAACACCGGGGAGCTGTTTTTTGGAGAA	CASSFSQNTGELFF	28	0.000248313	TCRBV03	TCRBD02-01	TCRBJ02-02*01
CTGTCGGCTGCTCCCTCCCAGACATCTGTGTACTTCTGTGCCAGCAGAGTCAGGGGCTCCTATAATTCACCCCTCCACTTTGGGAAC	CASRVRGSYNSPLHF	28	0.000248313	TCRBV06-05*01	TCRBD01-01*01	TCRBJ01-06*01
CAGCCCTCAGAACCCAGGGACTCAGCTGTGTACTTCTGTGCCAGCAGTTTGCTGGGGGGAAGAACAGATACGCAGTATTTTGGCCCA	CASSLLGGRTDTQYF	28	0.000248313	TCRBV12	TCRBD02-01*01	TCRBJ02-03*01
ACCAGTGCCCATCCTGAAGACAGCAGCTTCTACATCTGCAGTGCTAGAGATGGGGGGGGCTTGAACACTGAAGCTTTCTTTGGACAA	CSARDGGGLNTEAFF	28	0.000248313	TCRBV20	TCRBD02-01*01	TCRBJ01-01*01
CTCACTCTGGAGTCAGCTACCCGCTCCCAGACATCTGTGTATTTCTGCGCCAGCAGTTCCGAAAATCAGCCCCAGCATTTTGGTGAT	CASSSENQPQHF	28	0.000248313	TCRBV10-02*01	unknown	TCRBJ01-05*01
CTGGAGTCCGCCAGCACCAACCAGACATCTATGTACCTCTGTGCCAGCAGTGGCTTGGGATCTCATTACGAGCAGTACTTCGGGCCG	CASSGLGSHYEQYF	28	0.000248313	TCRBV28-01*01	unknown	TCRBJ02-07*01
CTGGGGTTGGAGTCGGCTGCTCCCTCCCAAACATCTGTGTACTTCTGTGCCAGCAGCACAGGGGTCTCACCCCTCCACTTTGGGAAC	CASSTGVSPLHF	28	0.000248313	TCRBV06	TCRBD01-01*01	TCRBJ01-06*01
CTGTCGGCTGCTCCCTCCCAGACATCTGTGTACTTCTGTGCCAGCAGGCAACAGGGCAACTATAATTCACCCCTCCACTTTGGGAAC	CASRQQGNYNSPLHF	27	0.000239444	TCRBV06-05*01	TCRBD01-01*01	TCRBJ01-06*01
ACTGTGAGCAACATGAGCCCTGAAGACAGCAGCATATATCTCTGCAGCGTTGCAAGGACAGTCGGGGAGACCCAGTACTTCGGGCCA	CSVARTVGETQYF	27	0.000239444	TCRBV29-01*01	TCRBD01-01*01	TCRBJ02-05*01
CTGACGATCCAGCGCACACAGCAGGAGGACTCGGCCGTGTATCTCTGTGCCAGCAGCTTAGCGGGGCCGGAGCAGTACTTCGGGCCG	CASSLAGPEQYF	27	0.000239444	TCRBV07-02*01	TCRBD01-01*01	TCRBJ02-07*01
GTGACCAGTGCCCATCCTGAAGACAGCAGCTTCTACATCTGCAGTGCTAGCGCTAGCGGGGGGAATTACGAGCAGTACTTCGGGCCG	CSASASGGNYEQYF	27	0.000239444	TCRBV20	TCRBD02-01*01	TCRBJ02-07*01
GTGACATCGGCCCAAAAGAACCCGACAGCTTTCTATCTCTGTGCCAGTAGCTCCGGGACAGGGATGCAGCCCCAGCATTTTGGTGAT	CASSSGTGMQPQHF	27	0.000239444	TCRBV19-01	TCRBD01-01*01	TCRBJ01-05*01
CTGGAGTCGGCTGCTCCCTCCCAGACATCTGTGTACTTCTGTGCCAGCAGTGAAGCCGTCAGGATCGGGGAGCTGTTTTTTGGAGAA	CASSEAVRIGELFF	27	0.000239444	TCRBV06-01*01	TCRBD01-01*01	TCRBJ02-02*01
AACATGAGCTCCTTGGAGCTGGGGGACTCAGCCCTGTACTTCTGTGCCAGCAGCTCGGAAGAGGGCTCTGAAGCTTTCTTTGGACAA	CASSSEEGSEAFF	27	0.000239444	TCRBV13-01*01	TCRBD02-01*02	TCRBJ01-01*01
ATTCTGGAGTCCGCCAGCACCAACCAGACATCTATGTACCTCTGTGCCAGCACCGGGGATCTCAATCAGCCCCAGCATTTTGGTGAT	CASTGDLNQPQHF	27	0.000239444	TCRBV28-01*01	TCRBD02-01*01	TCRBJ01-05*01
TCGGCTGCTCCCTCCCAGACATCTGTGTACTTCTGTGCCAGCAGTTACTCACAGAGCTCCTATAATTCACCCCTCCACTTTGGGAAC	CASSYSQSSYNSPLHF	27	0.000239444	TCRBV06-05*01	TCRBD01-01*01	TCRBJ01-06*01
TCTGTGTACTTCTGTGCCATCAGTGATTCCCTGGGTAGCTTGACGGGAATACGGGGGGACGGTAGATACGAGCAGTACTTCGGGCCG	CAISDSLGSLTGIRGDGRYEQYF	27	0.000239444	TCRBV10-03*01	TCRBD02-01*01	TCRBJ02-07*01
CCCAACCAGACCTCTCTGTACTTCTGTGCCAGCAGTTCAACTCGGACAGGGGGCGCTAACGGCAATCAGCCCCAGCATTTTGGTGAT	CASSSTRTGGANGNQPQHF	27	0.000239444	TCRBV27-01*01	TCRBD01-01*01	TCRBJ01-05*01
AGTGCCCATCCTGAAGACAGCAGCTTCTACATCTGCAGTGCCGCCGGCGGGACAGGGTCGTCCTACAATGAGCAGTTCTTCGGGCCA	CSAAGGTGSSYNEQFF	27	0.000239444	TCRBV20	TCRBD01-01*01	TCRBJ02-01*01
ACGATCCAGCGCACACAGCAGGAGGACTCGGCCGTGTATCTCTGTGCCAGCAGCCCTAGCGGGGCTAGCGGGCAGTTCTTCGGGCCA	CASSPSGASGQFF	26	0.000230576	TCRBV07-02*01	TCRBD02-01*01	TCRBJ02-01*01
ACCCGCTCCCAGACATCTGTGTATTTCTGCGCCAGCAGCGCAGGAGGGACCGGGACAGGGTATAATTCACCCCTCCACTTTGGGAAC	CASSAGGTGTGYNSPLHF	26	0.000230576	TCRBV10-02*01	TCRBD01-01*01	TCRBJ01-06*01
CGCTCACCAGGCCTGGGGGACGCAGCCATGTACCTGTGTGCCACCAGCAGAGAACAGCTTGGGGGTGAAAAACTGTTTTTTGGCAGT	CATSREQLGGEKLFF	26	0.000230576	TCRBV15-01*01	unknown	TCRBJ01-04*01
CTGGAGTCGCCCAGCCCCAACCAGACCTCTCTGTACTTCTGTGCCAATCAAAGGGACAGGCCTACCTACGAGCAGTACTTCGGGCCG	CANQRDRPTYEQYF	26	0.000230576	TCRBV27-01*01	TCRBD01-01*01	TCRBJ02-07*01
ATCCAGCGCACAGAGCAGGGGGACTCGGCCATGTATCTCTGTGCCAGCAGCTTAGGACAGCCCAATCAGCCCCAGCATTTTGGTGAT	CASSLGQPNQPQHF	26	0.000230576	TCRBV07-09	TCRBD01-01*01	TCRBJ01-05*01
GAGCTTGGGGACTCGGCCGTGTATCTCTGTGCCAGCAGCTTAGATCCTAGGACTAGCGGGGGGGCTTACGAGCAGTACTTCGGGCCG	CASSLDPRTSGGAYEQYF	26	0.000230576	TCRBV11-03*01	TCRBD02-01*01	TCRBJ02-07*01
ACGTTGGCGTCTGCTGTACCCTCTCAGACATCTGTGTACTTCTGTGCCAGCAGTGACTCCGACACCGGGGAGCTGTTTTTTGGAGAA	CASSDSDTGELFF	26	0.000230576	TCRBV06-04	TCRBD02-01	TCRBJ02-02*01
CAGCGCACAGAGCGGGGGGACTCAGCCGTGTATCTCTGTGCCAGCAGCTTAGGACTTTCGGGTCCAGATACGCAGTATTTTGGCCCA	CASSLGLSGPDTQYF	26	0.000230576	TCRBV07-03*01	TCRBD02-01	TCRBJ02-03*01
ACTGTGACATCGGCCCAAAAGAACCCGACAGCTTTCTATCTCTGTGCCACCACCCCGGGGGCGGCCGGGGAGCTGTTTTTTGGAGAA	CATTPGAAGELFF	26	0.000230576	TCRBV19-01	unknown	TCRBJ02-02*01
AATGTGAACGCCTTGTTGCTGGGGGACTCGGCCCTCTATCTCTGTGCCAGCAGCTTGAGGGCGAATGAAAAACTGTTTTTTGGCAGT	CASSLRANEKLFF	25	0.000221708	TCRBV05-06*01	unknown	TCRBJ01-04*01
AAGATCCAGCCCTCAGAACCCAGGGACTCAGCTGTGTACTTCTGTGCCAGCAGTTTCGGGCAGAATCAGCCCCAGCATTTTGGTGAT	CASSFGQNQPQHF	25	0.000221708	TCRBV12	unknown	TCRBJ01-05*01
CTGCTGTCGGCTGCTCCCTCCCAGACATCTGTGTACTTCTGTGCCAGCAGCCCAGGACAGTATAATTCACCCCTCCACTTTGGGAAC	CASSPGQYNSPLHF	25	0.000221708	TCRBV06-05*01	TCRBD01-01*01	TCRBJ01-06*01
ATCCTGGAGTCGCCCAGCCCCAACCAGACCTCTCTGTACTTCTGTGCCAGCAGTTTTGATACAGGGTTTGGCTACACCTTCGGTTCG	CASSFDTGFGYTF	25	0.000221708	TCRBV27-01*01	TCRBD01-01*01	TCRBJ01-02*01
GCCCATCCTGAAGACAGCAGCTTCTACATCTGCAGTGCTAGTACCCCCCGGGACAGGGAGAGGGGCACTGAAGCTTTCTTTGGACAA	CSASTPRDRERGTEAFF	25	0.000221708	TCRBV20	TCRBD01-01*01	TCRBJ01-01*01
CAGGTAGTGCGAGGAGATTCGGCAGCTTATTTCTGTGCCAGCTCACCCCTCATAACTAGAGCCCAAGAGACCCAGTACTTCGGGCCA	CASSPLITRAQETQYF	25	0.000221708	TCRBV18-01*01	TCRBD02-01	TCRBJ02-05*01
AGGCTGCTGTCGGCTGCTCCCTCCCAGACATCTGTGTACTTCTGTGCCAGCAACCCGGCGGGGAGGAACGAGCAGTACTTCGGGCCG	CASNPAGRNEQYF	25	0.000221708	TCRBV06-05*01	TCRBD02-01	TCRBJ02-07*01
CTGCTGTCGGCTGCTCCCTCCCAGACATCTGTGTACTTCTGTGCCAGCAGAAACGGTCTTCCGCCCCGGGAGCAGTACTTCGGGCCG	CASRNGLPPREQYF	25	0.000221708	TCRBV06-05*01	TCRBD02-01	TCRBJ02-07*01
TTGGCGTCTGCTGTACCCTCTCAGACATCTGTGTACTTCTGTGCCAGCAGTGAACAGGGGGACACAGATACGCAGTATTTTGGCCCA	CASSEQGDTDTQYF	25	0.000221708	TCRBV06-04	TCRBD01-01*01	TCRBJ02-03*01
ACTCTCAAGATCCAGCCTGCAGAGCTTGGGGACTCGGCCATGTATCTCTGTGCCAGCAGCGAAACGGGGGCCAAGTTCTTCGGGCCA	CASSETGAKFF	25	0.000221708	TCRBV11-01*01	unknown	TCRBJ02-01*01
CACACCCTGCAGCCAGAAGACTCGGCCCTGTATCTCTGCGCCAGCAAATCCGGGACCCCGGATCCCCACGAGCAGTACTTCGGGCCG	CASKSGTPDPHEQYF	25	0.000221708	TCRBV04-03*01	unknown	TCRBJ02-07*01
ACTCTGGAGTCCGCTACCAGCTCCCAGACATCTGTGTACTTCTGTGCCATCAGGGACGATCTAAGAAACACCATATATTTTGGAGAG	CAIRDDLRNTIYF	25	0.000221708	TCRBV10-03*01	unknown	TCRBJ01-03*01
CTGAGCTCTCTGGAGCTGGGGGACTCAGCTTTGTATTTCTGTGCCAGCAGCCTCGGGACGGTAGGAGATACGCAGTATTTTGGCCCA	CASSLGTVGDTQYF	25	0.000221708	TCRBV09-01	unknown	TCRBJ02-03*01
GCCCAAAAGAACCCGACAGCTTTCTATCTCTGTGCCAGTAGTATGGCTGGGACAGGGGTAGGGAATTCACCCCTCCACTTTGGGAAC	CASSMAGTGVGNSPLHF	25	0.000221708	TCRBV19-01	TCRBD01-01*01	TCRBJ01-06*01
GAGTCGCCCAGCCCCAACCAGACCTCTCTGTACTTCTGTGCCAGCATGCCGGGAGTGGGTTGGTACAATGAGCAGTTCTTCGGGCCA	CASMPGVGWYNEQFF	25	0.000221708	TCRBV27-01*01	TCRBD02-01*02	TCRBJ02-01*01
AGGCTGCTGTCGGCTGCTCCCTCCCAGACATCTGTGTACTTCTGTGCCAGCAGTTACTCCTATCAAGAGACCCAGTACTTCGGGCCA	CASSYSYQETQYF	25	0.000221708	TCRBV06-05*01	TCRBD02-01	TCRBJ02-05*01
ACAGTGACCAGTGCCCATCCTGAAGACAGCAGCTTCTACATCTGCAGTGCCTCAGGGAATAGGAACACTGAAGCTTTCTTTGGACAA	CSASGNRNTEAFF	25	0.000221708	TCRBV20	TCRBD01-01*01	TCRBJ01-01*01
ACGATTCAGCGCACAGAGCAGCGGGACTCAGCCATGTATCGCTGTGCCAGCAGCGTAGACAGGGACTCTGAAGCTTTCTTTGGACAA	CASSVDRDSEAFF	25	0.000221708	TCRBV07-07*01	unknown	TCRBJ01-01*01
GTGCAGCCTGCAGAACTGGAGGATTCTGGAGTTTATTTCTGTGCCAGCAGCCTTTTGGGTGGGGCCAACGTCCTGACTTTCGGGGCC	CASSLLGGANVLTF	25	0.000221708	TCRBV14-01*01	unknown	TCRBJ02-06*01
ACAGTGACCAGTGCCCATCCTGAAGACAGCAGCTTCTACATCTGCAGTGCTAGAGATTCGACGGACTATGGCTACACCTTCGGTTCG	CSARDSTDYGYTF	25	0.000221708	TCRBV20	unknown	TCRBJ01-02*01
CTGGAGTCGCCCAGCCCCAACCAGACCTCTCTGTACTTCTGTGCCAGCAGTTTCCGGGGGGGCAATCAGCCCCAGCATTTTGGTGAT	CASSFRGGNQPQHF	25	0.000221708	TCRBV27-01*01	TCRBD02-01*01	TCRBJ01-05*01
ACGATCCAGCGCACAGAGCAGCGGGACTCGGCCATGTATCGCTGTGCCAGCAGCTGGGGACAAGGGACGGAAGCTTTCTTTGGACAA	CASSWGQGTEAFF	24	0.00021284	TCRBV07-06*01	TCRBD01-01*01	TCRBJ01-01*01
ATCCAGCGCACACAGCAGGAGGACTCGGCCGTGTATCTCTGTGCCAGCAGCCGGGACGGAGCCTACAATGAGCAGTTCTTCGGGCCA	CASSRDGAYNEQFF	24	0.00021284	TCRBV07-02*01	unknown	TCRBJ02-01*01
CACACCCTGCAGCCAGAAGACTCGGCCCTGTATCTCTGCGCCAGCAGCCAAGATCGGGGCCCCTCCTACGAGCAGTACTTCGGGCCG	CASSQDRGPSYEQYF	24	0.00021284	TCRBV04-03*01	unknown	TCRBJ02-07*01
GAGATGAATGTGAGTGCCTTGGAGCTGGGGGACTCGGCCCTGTATCTCTGTGCCAGAAGCCCCAGCTATGGCTACACCTTCGGTTCG	CARSPSYGYTF	24	0.00021284	TCRBV05-03	TCRBD01-01*01	TCRBJ01-02*01
TCTGCTGCCTCCTCCCAGACATCTGTATATTTCTGCGCCAGCAGTGACCTTCCGAGGGAGGGCACAGATACGCAGTATTTTGGCCCA	CASSDLPREGTDTQYF	24	0.00021284	TCRBV10-01	TCRBD02-01*02	TCRBJ02-03*01
CCTGCAAAGCTTGAGGACTCGGCCGTGTATCTCTGTGCCAGCAGCTTAGGGTCTTTCGGGACTAGCGATGAGCAGTTCTTCGGGCCA	CASSLGSFGTSDEQFF	24	0.00021284	TCRBV11-02*02	TCRBD02-01	TCRBJ02-01*01
CAGCAGGTAGTGCGAGGAGATTCGGCAGCTTATTTCTGTGCCAGCTCATACGTAGGCCCCATGAACACTGAAGCTTTCTTTGGACAA	CASSYVGPMNTEAFF	24	0.00021284	TCRBV18-01*01	unknown	TCRBJ01-01*01
CAGCCTGCAAAGCTTGAGGACTCGGCCGTGTATCTCTGTGCCAGCAGCTTAGAGCCAGGCCCTACTTCACCCCTCCACTTTGGGAAC	CASSLEPGPTSPLHF	24	0.00021284	TCRBV11-02*02	TCRBD01-01*01	TCRBJ01-06*01
ATCAATTCCCTGGAGCTTGGTGACTCTGCTGTGTATTTCTGTGCCAGCAGACACCAAGGAGGGCCTGGGGCCCTCCACTTTGGGAAC	CASRHQGGPGALHF	24	0.00021284	TCRBV03	TCRBD02-01*02	TCRBJ01-06*01
AACCTGAGCTCTCTGGAGCTGGGGGACTCAGCTTTGTATTTCTGTGCCAGCAGCGCGGGTCGGAACACTGAAGCTTTCTTTGGACAA	CASSAGRNTEAFF	24	0.00021284	TCRBV09-01	TCRBD02-01	TCRBJ01-01*01
AAGATCCGGTCCACAAAGCTGGAGGACTCAGCCATGTACTTCTGTGCCAGCAGTCAAGGGGAGAACACTGAAGCTTTCTTTGGACAA	CASSQGENTEAFF	24	0.00021284	TCRBV02-01*01	unknown	TCRBJ01-01*01
CGCACACAGCAGGAGGACTCGGCCGTGTATCTCTGTGCCAGCAGCTACGGACTAGCGGGGAATGCAGATACGCAGTATTTTGGCCCA	CASSYGLAGNADTQYF	24	0.00021284	TCRBV07-02*01	TCRBD02-01*01	TCRBJ02-03*01
CTCAGGCTGCTGTCGGCTGCTCCCTCCCAGACATCTGTGTACTTCTGTGCCAGCCGGGACAGGGTATACGAGCAGTACTTCGGGCCG	CASRDRVYEQYF	24	0.00021284	TCRBV06-05*01	TCRBD01-01*01	TCRBJ02-07*01
CAGCCCTCAGAACCCAGGGACTCAGCTGTGTACTTCTGTGCCAGCAGTAGAAGCGGGGGGAAATACAATGAGCAGTTCTTCGGGCCA	CASSRSGGKYNEQFF	24	0.00021284	TCRBV12	TCRBD02-01*01	TCRBJ02-01*01
CTGGAGTTGGCTGCTCCCTCCCAGACATCTGTGTACTTCTGTGCCAGCAGTTACCTGACCATAAACTATGGCTACACCTTCGGTTCG	CASSYLTINYGYTF	24	0.00021284	TCRBV06-06	unknown	TCRBJ01-02*01
GTGAGCACCTTGGAGCTGGGGGACTCGGCCCTTTATCTTTGCGCCAGCAGCTCCAAAGTCGAGAACACTGAAGCTTTCTTTGGACAA	CASSSKVENTEAFF	24	0.00021284	TCRBV05-01*01	unknown	TCRBJ01-01*01
ATCCAGCGCACACAGCAGGAGGACTCGGCCGTGTATCTCTGTGCCAGCAGTCCTCTTCGGACAGGGACAGGCTACACCTTCGGTTCG	CASSPLRTGTGYTF	24	0.00021284	TCRBV07-02*01	TCRBD01-01*01	TCRBJ01-02*01
ACCAGTGCCCATCCTGAAGACAGCAGCTTCTACATCTGCAGTGCCCCGAGACAGGGAAGCATGCGCACTGAAGCTTTCTTTGGACAA	CSAPRQGSMRTEAFF	24	0.00021284	TCRBV20	TCRBD01-01*01	TCRBJ01-01*01
ACAGTGACCAGTGCCCATCCTGAAGACAGCAGCTTCTACATCTGCAGTGCTAGAGGGGTGGTGGACACTGAAGCTTTCTTTGGACAA	CSARGVVDTEAFF	24	0.00021284	TCRBV20	unknown	TCRBJ01-01*01
CTACACGCCCTGCAGCCAGAAGACTCAGCCCTGTATCTCTGCGCCAGCAGCCGTCAGGGTAAACAAGAGACCCAGTACTTCGGGCCA	CASSRQGKQETQYF	24	0.00021284	TCRBV04-01*01	TCRBD01-01*01	TCRBJ02-05*01
AAGATCCAGCCTGCAAAGCTTGAGGACTCGGCCGTGTATCTCTGTGCCAGCACCCGACAGCGCCAAGAGACCCAGTACTTCGGGCCA	CASTRQRQETQYF	24	0.00021284	TCRBV11-02*02	TCRBD01-01*01	TCRBJ02-05*01
GCCCTGCAGCCAGAAGACTCAGCCCTGTATCTCTGCGCCAGCAGCCAAGGACAGGGTGGGATGTACTACGAGCAGTACTTCGGGCCG	CASSQGQGGMYYEQYF	24	0.00021284	TCRBV04-01*01	TCRBD01-01*01	TCRBJ02-07*01
GCCCTGCAGCCAGAAGACTCAGCCCTGTATCTCTGCGCCAGCAGCCCGGGACAGGCGAGCTCCTACAATGAGCAGTTCTTCGGGCCA	CASSPGQASSYNEQFF	24	0.00021284	TCRBV04-01*01	TCRBD01-01*01	TCRBJ02-01*01
CGCTCACCAGGCCTGGGGGACGCAGCCATGTACCTGTGTGCCACCAGCAGTGACAAGGGGGTCAATCAGCCCCAGCATTTTGGTGAT	CATSSDKGVNQPQHF	23	0.000203971	TCRBV15-01*01	TCRBD01-01*01	TCRBJ01-05*01
ATCCGGTCCACAAAGCTGGAGGACTCAGCCATGTACTTCTGTGCCAGCGGTGCAGGGGCGCAGGTTGAAAAACTGTTTTTTGGCAGT	CASGAGAQVEKLFF	23	0.000203971	TCRBV02-01*01	TCRBD01-01*01	TCRBJ01-04*01
GTGACCAGTGCCCATCCTGAAGACAGCAGCTTCTACATCTGCAGTGCTTCTCCGACTAGCGGGATAAAGACCCAGTACTTCGGGCCA	CSASPTSGIKTQYF	23	0.000203971	TCRBV20	TCRBD02-01*02	TCRBJ02-05*01
AAGGTGCAGCCTGCAGAACTGGAGGATTCTGGAGTTTATTTCTGTGCCAGCAGCCCCTGGGGGTTTTGGGGCTACACCTTCGGTTCG	CASSPWGFWGYTF	23	0.000203971	TCRBV14-01*01	unknown	TCRBJ01-02*01
ACAGTGACCAGTGCCCATCCTGAAGACAGCAGCTTCTACATCTGCAGTGCTAGTGAGGACACAACAAGAACCCTCCACTTTGGGAAC	CSASEDTTRTLHF	23	0.000203971	TCRBV20	TCRBD01-01*01	TCRBJ01-06*01
CGGTCCACAAAGCTGGAGGACTCAGCCATGTACTTCTGTGCCAGCAGTGAACAGGCAGGGGTAGGAGAAAAACTGTTTTTTGGCAGT	CASSEQAGVGEKLFF	23	0.000203971	TCRBV02-01*01	TCRBD01-01*01	TCRBJ01-04*01
ACCCTGCAGCCAGAAGACTCGGCCCTGTATCTCTGTGCCAGCAGCCAAGATGAAGACAGAATCACAGATACGCAGTATTTTGGCCCA	CASSQDEDRITDTQYF	23	0.000203971	TCRBV04-02*01	TCRBD01-01*01	TCRBJ02-03*01
ATCCGGTCCACAAAGCTGGAGGACTCAGCCATGTACTTCTGTGCCAGCACCGGAGGACAGGGAGATCAGCCCCAGCATTTTGGTGAT	CASTGGQGDQPQHF	23	0.000203971	TCRBV02-01*01	TCRBD01-01*01	TCRBJ01-05*01
CTGAAGGTGCAGCCTGCAGAACTGGAGGATTCTGGAGTTTATTTCTGTGCCAGCAGTCCTTTGGTAGATACGCAGTATTTTGGCCCA	CASSPLVDTQYF	23	0.000203971	TCRBV14-01*01	unknown	TCRBJ02-03*01
CTGAAGATCCAGCCCTCAGAACCCAGGGACTCAGCTGTGTACTTCTGTGCCAGCAGTTCCCCATATTCACCCCTCCACTTTGGGAAC	CASSSPYSPLHF	23	0.000203971	TCRBV12	TCRBD01-01*01	TCRBJ01-06*01
TCCACAAAGCTGGAGGACTCAGCCATGTACTTCTGTGCCAGCAGGGCACAGGGGTCCGGGGTCAATCAGCCCCAGCATTTTGGTGAT	CASRAQGSGVNQPQHF	23	0.000203971	TCRBV02-01*01	TCRBD01-01*01	TCRBJ01-05*01
GAGATCCAGCGCACAGAGCAGGGGGACTCGGCCATGTATCTCTGTGCCAGCACGGAGAACTCTGGAAACACCATATATTTTGGAGAG	CASTENSGNTIYF	23	0.000203971	TCRBV07-09	TCRBD02-01*02	TCRBJ01-03*01
CTGGAGCTTGGTGACTCTGCTGTGTATTTCTGTGCCAGCAGCCAAGAGGGAGGGGTCTCTGGGGCCAACGTCCTGACTTTCGGGGCC	CASSQEGGVSGANVLTF	23	0.000203971	TCRBV03	TCRBD02-01*02	TCRBJ02-06*01
CAGCGCACACAGCAGGAGGACTCGGCCGTGTATCTCTGTGCCAGCAGCTTAGACGGCGGGCGATATTCACCCCTCCACTTTGGGAAC	CASSLDGGRYSPLHF	23	0.000203971	TCRBV07-02*01	TCRBD02-01	TCRBJ01-06*01
ATCCTGAGGATCCAGCAGGTAGTGCGAGGAGATTCGGCAGCTTATTTCTGTGCCAGCTCAAGCGGAGACGGCTACACCTTCGGTTCG	CASSSGDGYTF	23	0.000203971	TCRBV18-01*01	TCRBD02-01	TCRBJ01-02*01
ACAGTGACCAGTGCCCATCCTGAAGACAGCAGCTTCTACATCTGCAGTGCTAGCCAGGGGGCGTTCACTGAAGCTTTCTTTGGACAA	CSASQGAFTEAFF	22	0.000195103	TCRBV20	TCRBD01-01*01	TCRBJ01-01*01
AATGTGAACGCCTTGTTGCTGGGGGACTCGGCCCTCTATCTCTGTGCCAGCAGCTTAAGCGGCTCCTACGAGCAGTACTTCGGGCCG	CASSLSGSYEQYF	22	0.000195103	TCRBV05-06*01	TCRBD02-01	TCRBJ02-07*01
GTGAGCACCTTGGAGCTGGGGGACTCGGCCCTTTATCTTTGCGCCAGCAGCTTGGCCGGGGGGCAACGGGAGCAGTACTTCGGGCCG	CASSLAGGQREQYF	22	0.000195103	TCRBV05-01*01	TCRBD02-01*01	TCRBJ02-07*01
ATCCAGCGCACACAGCAGGAGGACTCGGCCGTGTATCTCTGTGCCAGCAGCCCGCCAGGGAGGGGCACTGAAGCTTTCTTTGGACAA	CASSPPGRGTEAFF	22	0.000195103	TCRBV07-02*01	TCRBD02-01*02	TCRBJ01-01*01
GCGTCTGCTGTACCCTCTCAGACATCTGTGTACTTCTGTGCCAGCAGTGACGGGGCAGGAACGTACAATGAGCAGTTCTTCGGGCCA	CASSDGAGTYNEQFF	22	0.000195103	TCRBV06-04	TCRBD01-01*01	TCRBJ02-01*01
GTGACCAGTGCCCATCCTGAAGACAGCAGCTTCTACATCTGCAGTGCTAGTTCGGCCGTATTTAGGGCTGAAGCTTTCTTTGGACAA	CSASSAVFRAEAFF	22	0.000195103	TCRBV20	unknown	TCRBJ01-01*01
ATCCAGCAGGTAGTGCGAGGAGATTCGGCAGCTTATTTCTGTGCCAGCTCACCGGACAGGGCGATCAACGAGCAGTACTTCGGGCCG	CASSPDRAINEQYF	22	0.000195103	TCRBV18-01*01	TCRBD01-01*01	TCRBJ02-07*01
GAGCTGGGGGACTCAGCTTTGTATTTCTGTGCCAGCAGCGTAGCGGACGGGACTAGCGGGCACACAGATACGCAGTATTTTGGCCCA	CASSVADGTSGHTDTQYF	22	0.000195103	TCRBV09-01	TCRBD02-01	TCRBJ02-03*01
ACAGTGACCAGTGCCCATCCTGAAGACAGCAGCTTCTACATCTGCAGTGCTGCTAAGGGGGTAGAGTATGGCTACACCTTCGGTTCG	CSAAKGVEYGYTF	22	0.000195103	TCRBV20	TCRBD01-01*01	TCRBJ01-02*01
AAGATCCAGCGCACACAGCAGGAGGACTCCGCCGTGTATCTCTGTGCCAGCAGCTTAACAGGGGGCACTGAAGCTTTCTTTGGACAA	CASSLTGGTEAFF	22	0.000195103	TCRBV07-08*01	TCRBD01-01*01	TCRBJ01-01*01
GAGATCCAGCGCACAGAGCAGGGGGACTCGGCCATGTATCTCTGTGCCAGCAGCTTATCCGGCAATCAGCCCCAGCATTTTGGTGAT	CASSLSGNQPQHF	22	0.000195103	TCRBV07-09	TCRBD02-01	TCRBJ01-05*01
ATGAGCTCCTTGGAGCTGGGGGACTCAGCCCTGTACTTCTGTGCCAGCAGCTTAGGGGGCAGTGGCTACGAGCAGTACTTCGGGCCG	CASSLGGSGYEQYF	22	0.000195103	TCRBV13-01*01	TCRBD01-01*01	TCRBJ02-07*01
ATCCAGCCCTCAGAACCCAGGGACTCAGCTGTGTACTTCTGTGCCAGCAGTGGTAGCGATAGCTCCTACGAGCAGTACTTCGGGCCG	CASSGSDSSYEQYF	22	0.000195103	TCRBV12	TCRBD02-01	TCRBJ02-07*01
TTGGAGCTGGGGGACTCGGCCCTTTATCTTTGCGCCAGCAGCACCTCTACCGGGGCCCAGGGAACCTACGAGCAGTACTTCGGGCCG	CASSTSTGAQGTYEQYF	22	0.000195103	TCRBV05-01*01	unknown	TCRBJ02-07*01
TTGGCTGCTCCCTCCCAGACATCTGTGTACTTCTGTGCCAGCAGTCTCCCCCCGGGGGCAGGTGGAAACACCATATATTTTGGAGAG	CASSLPPGAGGNTIYF	22	0.000195103	TCRBV06-06	unknown	TCRBJ01-03*01
TCGGCTGCTCCCTCCCAGACATCTGTGTACTTCTGTGCCAGCAGTTACCGGAAGAGATCATCGAACACTGAAGCTTTCTTTGGACAA	CASSYRKRSSNTEAFF	22	0.000195103	TCRBV06-05*01	unknown	TCRBJ01-01*01
CAGCGCACACAGCAGGAGGACTCCGCCGTGTATCTCTGTGCCAGCAGCTTAGAGGGGGCCGTGGGCACTGAAGCTTTCTTTGGACAA	CASSLEGAVGTEAFF	21	0.000186235	TCRBV07-08*01	TCRBD01-01*01	TCRBJ01-01*01
GTGACCAGTGCCCATCCTGAAGACAGCAGCTTCTACATCTGCAGTGCCTCACCTAGCGGGGGGAACTACGAGCAGTACTTCGGGCCG	CSASPSGGNYEQYF	21	0.000186235	TCRBV20	TCRBD02-01*01	TCRBJ02-07*01
ACCTTGGAGATCCAGCGCACAGAGCAGGGGGACTCGGCCATGTATCTCTGTGCCAGCAGCTTAAACAATGAGCAGTTCTTCGGGCCA	CASSLNNEQFF	21	0.000186235	TCRBV07-09	unknown	TCRBJ02-01*01
CTGACCCTGGAGTCTGCCAGGCCCTCACATACCTCTCAGTACCTCTGTGCCAGCAGTGATTCGACAGTTTTCCAGTACTTCGGGCCG	CASSDSTVFQYF	21	0.000186235	TCRBV25-01*01	TCRBD01-01*01	TCRBJ02-07*01
TCTCTGGAGCTGGGGGACTCAGCTTTGTATTTCTGTGCCAGCAACCCTCTGGGAACACTCAACACCGGGGAGCTGTTTTTTGGAGAA	CASNPLGTLNTGELFF	21	0.000186235	TCRBV09-01	unknown	TCRBJ02-02*01
GTGAACGCCTTGTTGCTGGGGGACTCGGCCCTCTATCTCTGTGCCAGCAGCTTGGCAGGGTCGAACTATGGCTACACCTTCGGTTCG	CASSLAGSNYGYTF	21	0.000186235	TCRBV05-06*01	TCRBD01-01*01	TCRBJ01-02*01
CTGGAGTCGGCTGCTCCCTCCCAGACATCTGTGTACTTCTGTGCCAGCAGTGGGGACAGTGGGAATTCACCCCTCCACTTTGGGAAC	CASSGDSGNSPLHF	21	0.000186235	TCRBV06-01*01	TCRBD01-01*01	TCRBJ01-06*01
TCCCTAGAGTCTGCCATCCCCAACCAGACAGCTCTTTACTTCTGTGCCACCAGTGAGGGGGGAAATCAGCCCCAGCATTTTGGTGAT	CATSEGGNQPQHF	21	0.000186235	TCRBV24	TCRBD02-01*01	TCRBJ01-05*01
ACCAGTGCCCATCCTGAAGACAGCAGCTTCTACATCTGCAGTGCTAGAGATCTCCGACAAGCCGAAGAGACCCAGTACTTCGGGCCA	CSARDLRQAEETQYF	21	0.000186235	TCRBV20	TCRBD01-01*01	TCRBJ02-05*01
CAGCCCTCAGAACCCAGGGACTCAGCTGTGTACTTCTGTGCCAGCAGTGGGACAGGGGGCGGCAATCAGCCCCAGCATTTTGGTGAT	CASSGTGGGNQPQHF	21	0.000186235	TCRBV12	TCRBD01-01*01	TCRBJ01-05*01
CCTGCAGAACTGGAGGATTCTGGAGTTTATTTCTGTGCCAGCAGCCAAGCTAGCGGGAGGGCCAAAAACATTCAGTACTTCGGCGCC	CASSQASGRAKNIQYF	21	0.000186235	TCRBV14-01*01	TCRBD02-01*02	TCRBJ02-04*01
CGGTCCACAAAGCTGGAGGACTCAGCCATGTACTTCTGTGCCAGCAGTCGTACAGGGGGCCCAGGGGAGACCCAGTACTTCGGGCCA	CASSRTGGPGETQYF	21	0.000186235	TCRBV02-01*01	TCRBD01-01*01	TCRBJ02-05*01
AAGATCCGGTCCACAAAGCTGGAGGACTCAGCCATGTACTTCTGTGCCAGCACGGGTCAAGTGGGCTACGAGCAGTACTTCGGGCCG	CASTGQVGYEQYF	21	0.000186235	TCRBV02-01*01	TCRBD02-01	TCRBJ02-07*01
ACGATCCAGCGCACACAGCAGGAGGACTCGGCCGTGTATCTCTGTGCCAGCAGCTCCGGGACAGGGTATGGCTACACCTTCGGTTCG	CASSSGTGYGYTF	21	0.000186235	TCRBV07-02*01	TCRBD01-01*01	TCRBJ01-02*01
GAGTCGGCTGCTCCCTCCCAGACATCTGTGTACTTCTGTGCCAGCACCCCATTCGGGCAGAACGAATACGAGCAGTACTTCGGGCCG	CASTPFGQNEYEQYF	21	0.000186235	TCRBV06-01*01	unknown	TCRBJ02-07*01
GCCTTGGAGCTGGACGACTCGGCCCTGTATCTCTGTGCCAGCACCTATACAGGGGGCAAACGAAATGAAAAACTGTTTTTTGGCAGT	CASTYTGGKRNEKLFF	21	0.000186235	TCRBV05-04*01	TCRBD01-01*01	TCRBJ01-04*01
CAGCCTGCAAAGCTTGAGGACTCGGCCGTGTATCTCTGTGCCAGCAGCCCCCGCGGGGGGAACACAGATACGCAGTATTTTGGCCCA	CASSPRGGNTDTQYF	21	0.000186235	TCRBV11-02*02	TCRBD02-01*01	TCRBJ02-03*01
CTGACAGTGACCAGTGCCCATCCTGAAGACAGCAGCTTCTACATCTGCAGTGCTAGGAACAGGGACACTGAAGCTTTCTTTGGACAA	CSARNRDTEAFF	21	0.000186235	TCRBV20	TCRBD01-01*01	TCRBJ01-01*01
CCTGAAGACAGCAGCTTCTACATCTGCAGTGCAGGTCGTCCGGGACTAGCGGGGGGGCGGGTGAAAGAGACCCAGTACTTCGGGCCA	CSAGRPGLAGGRVKETQYF	21	0.000186235	TCRBV20	TCRBD02-01*01	TCRBJ02-05*01
CTGACTGTGAGCAACATGAGCCCTGAAGACAGCAGCATATATCTCTGCAGCGTCCGGACAGGGGGCGGAAAACTGTTTTTTGGCAGT	CSVRTGGGKLFF	20	0.000177366	TCRBV29-01*01	TCRBD01-01*01	TCRBJ01-04*01
CTGGAGTCTGCTGCCTCCTCCCAGACATCTGTATATTTCTGCGCCAGCAGTGCGGGGGACACAAATTCACCCCTCCACTTTGGGAAC	CASSAGDTNSPLHF	20	0.000177366	TCRBV10-01	unknown	TCRBJ01-06*01
CACGCCCTGCAGCCAGAAGACTCAGCCCTGTATCTCTGCGCCAGCAGCCAAGACGAGCAGGGTACCTACGAGCAGTACTTCGGGCCG	CASSQDEQGTYEQYF	20	0.000177366	TCRBV04-01*01	TCRBD01-01*01	TCRBJ02-07*01
TCGCCCAGCCCCAACCAGACCTCTCTGTACTTCTGTGCCAGCAGTTCTGGAGGGGCGCTTAACGAGGAGACCCAGTACTTCGGGCCA	CASSSGGALNEETQYF	20	0.000177366	TCRBV27-01*01	TCRBD02-01*02	TCRBJ02-05*01
ATCCAGCCTGCAAAGCTTGAGGACTCGGCCGTGTATCTCTGTGCCAGCAGCGTCGGGACCACAGGGGAGACCCAGTACTTCGGGCCA	CASSVGTTGETQYF	20	0.000177366	TCRBV11-02*02	TCRBD01-01*01	TCRBJ02-05*01
GCGTCTGCTGTACCCTCTCAGACATCTGTGTACTTCTGTGCCAGCAGTGAGCTAGCGGGGTCATCCTACGAGCAGTACTTCGGGCCG	CASSELAGSSYEQYF	20	0.000177366	TCRBV06-04	TCRBD02-01*01	TCRBJ02-07*01
ATCCAGCGCACAGAGCAGGGGGACTCGGCCATGTATCTCTGTGCCAGCAGGTCGGGACAGGGCGGCACTGAAGCTTTCTTTGGACAA	CASRSGQGGTEAFF	20	0.000177366	TCRBV07-09	TCRBD01-01*01	TCRBJ01-01*01
AGGCTGCTGTCGGCTGCTCCCTCCCAGACATCTGTGTACTTCTGTGCCAGCAGACACAGGGACTCCTACGAGCAGTACTTCGGGCCG	CASRHRDSYEQYF	20	0.000177366	TCRBV06-05*01	TCRBD01-01*01	TCRBJ02-07*01
ATCCAGCCCTCAGAACCCAGGGACTCAGCTGTGTACTTCTGTGCCAGCAGTATTCTGGGTAGCAATCAGCCCCAGCATTTTGGTGAT	CASSILGSNQPQHF	20	0.000177366	TCRBV12	unknown	TCRBJ01-05*01
ACTCTGGAGTCCGCTACCAGCTCCCAGACATCTGTGTACTTCTGTGCCATCAGTGACAGGGAGTCCAATGAGCAGTTCTTCGGGCCA	CAISDRESNEQFF	20	0.000177366	TCRBV10-03*01	unknown	TCRBJ02-01*01
CAGCGCACAGAGCAGGGGGACTCGGCCATGTATCTCTGTGCCAGCAGTTGGGGACAGGGGGTAAAAAATGAGCAGTTCTTCGGGCCA	CASSWGQGVKNEQFF	20	0.000177366	TCRBV07-09	TCRBD01-01*01	TCRBJ02-01*01
AACCTTCACCTACACGCCCTGCAGCCAGAAGACTCAGCCCTGTATCTCTGCGCCAGCACTCAAGGGACTGGCTACACCTTCGGTTCG	CASTQGTGYTF	20	0.000177366	TCRBV04-01*01	unknown	TCRBJ01-02*01
ACTCTGACTGTGAGCAACATGAGCCCTGAAGACAGCAGCATATATCTCTGCAGCGTTGTCGGGCGACAGGGCTACACCTTCGGTTCG	CSVVGRQGYTF	20	0.000177366	TCRBV29-01*01	TCRBD01-01*01	TCRBJ01-02*01
CGCACAGAGCAGGGGGACTCGGCCATGTATCTCTGTGCCAGCAGCTTAGCATTGGTACAGGGGGCTGGAAAACTGTTTTTTGGCAGT	CASSLALVQGAGKLFF	20	0.000177366	TCRBV07-09	TCRBD01-01*01	TCRBJ01-04*01
AAGATCCAGCCTGCAAAGCTTGAGGACTCGGCCGTGTATCTCTGTGCCAGCAGCTTTAAACAGGGGATGGGCTACACCTTCGGTTCG	CASSFKQGMGYTF	20	0.000177366	TCRBV11-02*02	TCRBD01-01*01	TCRBJ01-02*01
ACTGTGACATCGGCCCAAAAGAACCCGACAGCTTTCTATCTCTGTGCCAGTAGTATACAGGATAGACAGCCCCAGCATTTTGGTGAT	CASSIQDRQPQHF	20	0.000177366	TCRBV19-01	TCRBD01-01*01	TCRBJ01-05*01
TTGGCGTCTGCTGTACCCTCTCAGACATCTGTGTACTTCTGTGCCAGCAGTGACTCTCAGGGCACAGATACGCAGTATTTTGGCCCA	CASSDSQGTDTQYF	20	0.000177366	TCRBV06-04	TCRBD01-01*01	TCRBJ02-03*01
GTGAGCACCTTGGAGCTGGGGGACTCGGCCCTTTATCTTTGCGCCAGCAGCTTGTTAGGGCAGAATTCACCCCTCCACTTTGGGAAC	CASSLLGQNSPLHF	19	0.000168498	TCRBV05-01*01	unknown	TCRBJ01-06*01
AAGGTGCAGCCTGCAGAACTGGAGGATTCTGGAGTTTATTTCTGTGCCAGCAGCCTTTATTTTAATTCACCCCTCCACTTTGGGAAC	CASSLYFNSPLHF	19	0.000168498	TCRBV14-01*01	TCRBD02-01	TCRBJ01-06*01
ACAGTGACCAGTGCCCATCCTGAAGACAGCAGCTTCTACATCTGCAGTGCTACTCTCCCGGGCCGTCACGAGCAGTACTTCGGGCCG	CSATLPGRHEQYF	19	0.000168498	TCRBV20	unknown	TCRBJ02-07*01
TTGGAGATCCAGTCCACGGAGTCAGGGGACACAGCACTGTATTTCTGTGCCAGCAGGGAAAGGGCCTACGAGCAGTACTTCGGGCCG	CASRERAYEQYF	19	0.000168498	TCRBV21-01*01	unknown	TCRBJ02-07*01
CTGAAGATCCAGCCCTCAGAACCCAGGGACTCAGCTGTGTACTTCTGTGCCAGCAGCAGGGACCCCTACGAGCAGTACTTCGGGCCG	CASSRDPYEQYF	19	0.000168498	TCRBV12	unknown	TCRBJ02-07*01
GTGACATCGGCCCAAAAGAACCCGACAGCTTTCTATCTCTGTGCCAGTAGATCGGACAGGCTGAACTATGGCTACACCTTCGGTTCG	CASRSDRLNYGYTF	19	0.000168498	TCRBV19-01	TCRBD01-01*01	TCRBJ01-02*01
CAGCGCACAGAGCAGGGGGACTCGGCCATGTATCTCTGTGCCAGCAGCTTAGGTACAGGGGTTTACACTGAAGCTTTCTTTGGACAA	CASSLGTGVYTEAFF	19	0.000168498	TCRBV07-09	TCRBD01-01*01	TCRBJ01-01*01
CAGCGCACAGAGCAGGGGGACTCGGCCATGTATCTCTGTGCCAGCAGCTTTCGAGGGCAAGCTAATGAAAAACTGTTTTTTGGCAGT	CASSFRGQANEKLFF	19	0.000168498	TCRBV07-09	TCRBD02-01*02	TCRBJ01-04*01
CTTCACCTACACACCCTGCAGCCAGAAGACTCGGCCCTGTATCTCTGTGCCAGCAGCCAAGTTGGGGATACGCAGTATTTTGGCCCA	CASSQVGDTQYF	19	0.000168498	TCRBV04-02*01	unknown	TCRBJ02-03*01
CAGCCCTCAGAACCCAGGGACTCAGCTGTGTACTTCTGTGCCAGCAGCCGCGACAGGGGTGGCACCGGGGAGCTGTTTTTTGGAGAA	CASSRDRGGTGELFF	19	0.000168498	TCRBV12	TCRBD01-01*01	TCRBJ02-02*01
CCCAGGGACTCAGCTGTGTACTTCTGTGCCAGCAGTTTAGTCAGGTTGCTGGCACCTCGCAACACCGGGGAGCTGTTTTTTGGAGAA	CASSLVRLLAPRNTGELFF	19	0.000168498	TCRBV12	TCRBD01-01*01	TCRBJ02-02*01
AGCAACATGAGCCCTGAAGACAGCAGCATATATCTCTGCAGCGTTGAGTTGGGGAGCTCTGGGGCCAACGTCCTGACTTTCGGGGCC	CSVELGSSGANVLTF	19	0.000168498	TCRBV29-01*01	TCRBD02-01*02	TCRBJ02-06*01
GCTCCCTCCCAAACATCTGTGTACTTCTGTGCCAGCACCTTTTCCCGAGACAGGGACGCTGGGGCCAACGTCCTGACTTTCGGGGCC	CASTFSRDRDAGANVLTF	19	0.000168498	TCRBV06	TCRBD01-01*01	TCRBJ02-06*01
TCTCTGGAGCTGGGGGACTCAGCTTTGTATTTCTGTGCCAGCAGCCCCTCGACCGGGACAGGCTCCTACGAGCAGTACTTCGGGCCG	CASSPSTGTGSYEQYF	19	0.000168498	TCRBV09-01	TCRBD01-01*01	TCRBJ02-07*01
GTGACCAGTGCCCATCCTGAAGACAGCAGCTTCTACATCTGCAGTGCTAGAGATCAAACAGCTAGTTTCGAGCAGTACTTCGGGCCG	CSARDQTASFEQYF	19	0.000168498	TCRBV20	unknown	TCRBJ02-07*01
ATCCAGGCTACGAAGCTTGAGGATTCAGCAGTGTATTTTTGTGCCAGCATTACCGGGACGGAAACTTACGAGCAGTACTTCGGGCCG	CASITGTETYEQYF	19	0.000168498	TCRBV16-01	unknown	TCRBJ02-07*01
ATCCAGCGCACACAGCAGGAGGACTCGGCCGTGTATCTCTGTGCCAGCAGCTACCCGCCGGGTCAGTCACCCCTCCACTTTGGGAAC	CASSYPPGQSPLHF	19	0.000168498	TCRBV07-02*01	TCRBD02-01	TCRBJ01-06*01
CTGACGATCCAGCGCACACAGCAGGAGGACTCGGCCGTGTATCTCTGTGCCAGCAGCTTACCTTCCTACGAGCAGTACTTCGGGCCG	CASSLPSYEQYF	19	0.000168498	TCRBV07-02*01	TCRBD02-01	TCRBJ02-07*01
ACAGAGCGGGGGGACTCAGCCGTGTATCTCTGTGCCAGCAGCTTCGGGGGACCACGCTCTGGGGCCAACGTCCTGACTTTCGGGGCC	CASSFGGPRSGANVLTF	19	0.000168498	TCRBV07-03*01	TCRBD02-01*01	TCRBJ02-06*01
TCCGCTACCAGCTCCCAGACATCTGTGTACTTCTGTGCCATCAGTGAGTCAGGGCTCCGGGCAGCCGGGGAGCTGTTTTTTGGAGAA	CAISESGLRAAGELFF	18	0.00015963	TCRBV10-03*01	unknown	TCRBJ02-02*01
ACATCGGCCCAAAAGAACCCGACAGCTTTCTATCTCTGTGCCAGTAGTATAGGTCTGGGGGCGCAACGCGAGCAGTACTTCGGGCCG	CASSIGLGAQREQYF	18	0.00015963	TCRBV19-01	TCRBD01-01*01	TCRBJ02-07*01
CTGAAGATCCAGCCCTCAGAACCCAGGGACTCAGCTGTGTACTTCTGTGCCAGCACCCCTGGGGGGTACGAGCAGTACTTCGGGCCG	CASTPGGYEQYF	18	0.00015963	TCRBV12	TCRBD02-01*01	TCRBJ02-07*01
AATGTGAACGCCTTGGAGCTGGACGACTCGGCCCTGTATCTCTGTGCCAGCAGCGCGGGGACAGCGGTTGGCTACACCTTCGGTTCG	CASSAGTAVGYTF	18	0.00015963	TCRBV05-04*01	TCRBD01-01*01	TCRBJ01-02*01
ATCCAGCCCTCAGAACCCAGGGACTCAGCTGTGTACTTCTGTGCCAGCAGTTTAAACGGGGTAGCATACGAGCAGTACTTCGGGCCG	CASSLNGVAYEQYF	18	0.00015963	TCRBV12	TCRBD02-01*01	TCRBJ02-07*01
TCCACAAAGCTGGAGGACTCAGCCATGTACTTCTGTGCCAGCAGTGACCAGGGATTAGGCCGGGGGGAGACCCAGTACTTCGGGCCA	CASSDQGLGRGETQYF	18	0.00015963	TCRBV02-01*01	TCRBD02-01*01	TCRBJ02-05*01
ATCCAGCCCTCAGAACCCAGGGACTCAGCTGTGTACTTCTGTGCCAGCAGTTTACGTTCAACATCCTATGGCTACACCTTCGGTTCG	CASSLRSTSYGYTF	18	0.00015963	TCRBV12	TCRBD01-01*01	TCRBJ01-02*01
CTGAAGATCCAGCCCTCAGAACCCAGGGACTCAGCTGTGTACTTCTGTGCCAGCAGTTTATCGAGTGGTGGCTACACCTTCGGTTCG	CASSLSSGGYTF	18	0.00015963	TCRBV12	TCRBD02-01*02	TCRBJ01-02*01
GTGAGCACCTTGGAGCTGGGGGACTCGGCCCTTTATCTTTGCGCCAGCAGCTTGACCGGGGCCTCAGAGACCCAGTACTTCGGGCCA	CASSLTGASETQYF	18	0.00015963	TCRBV05-01*01	unknown	TCRBJ02-05*01
AAGATCCGGTCCACAAAGCTGGAGGACTCAGCCATGTACTTCTGTGCCAGCAGTGAACTAGAGAACACTGAAGCTTTCTTTGGACAA	CASSELENTEAFF	18	0.00015963	TCRBV02-01*01	TCRBD02-01	TCRBJ01-01*01
CTGGAGTCGGCTGCTCCCTCCCAGACATCTGTGTACTTCTGTGCCAGCAGTGAATGGCAGGGGGGGGCTGAAGCTTTCTTTGGACAA	CASSEWQGGAEAFF	18	0.00015963	TCRBV06-01*01	unknown	TCRBJ01-01*01
CAGCGCACAGAGCGGGGGGACTCAGCCGTGTATCTCTGTGCCAGCAGCGCCGTGGGACCGGTGGGCACTGAAGCTTTCTTTGGACAA	CASSAVGPVGTEAFF	18	0.00015963	TCRBV07-03*01	unknown	TCRBJ01-01*01
CTGGAGTCGGCTGCTCCCTCCCAGACATCTGTGTACTTCTGTGCCAGCAGTGAGACCCCGGACACCGGGGAGCTGTTTTTTGGAGAA	CASSETPDTGELFF	18	0.00015963	TCRBV06-01*01	unknown	TCRBJ02-02*01
CGGTCCACAAAGCTGGAGGACTCAGCCATGTACTTCTGTGCCAGCATGCCCGGGTCGTCTTATCGCGGGGAGCTGTTTTTTGGAGAA	CASMPGSSYRGELFF	18	0.00015963	TCRBV02-01*01	TCRBD02-01	TCRBJ02-02*01
GTGCAGCCTGCAGAACTGGAGGATTCTGGAGTTTATTTCTGTGCCAGCAGCCGGTCTAGCGGGGACAATGAGCAGTTCTTCGGGCCA	CASSRSSGDNEQFF	18	0.00015963	TCRBV14-01*01	TCRBD02-01*01	TCRBJ02-01*01
GTGACCAGTGCCCATCCTGAAGACAGCAGCTTCTACATCTGCAGTGCTAGGGAACAGGTGGGCGGTGAAAAACTGTTTTTTGGCAGT	CSAREQVGGEKLFF	18	0.00015963	TCRBV20	TCRBD01-01*01	TCRBJ01-04*01
CCTCTCACTGTGACATCGGCCCAAAAGAACCCGACAGCTTTCTATCTCTGTGCCAGTAGTATGTCTGTTACGCAGTATTTTGGCCCA	CASSMSVTQYF	18	0.00015963	TCRBV19-01	TCRBD02-01	TCRBJ02-03*01
ACAAAGCTGGAGGACTCAGCCATGTACTTCTGTGCCAGCAGTGAATTCCGGGGGACAGGTTCTGATTCACCCCTCCACTTTGGGAAC	CASSEFRGTGSDSPLHF	18	0.00015963	TCRBV02-01*01	TCRBD01-01*01	TCRBJ01-06*01
GTGAGCAACATGAGCCCTGAAGACAGCAGCATATATCTCTGCAGCGTTGTTGGTAGCGGGGGTGGAGAGACCCAGTACTTCGGGCCA	CSVVGSGGGETQYF	18	0.00015963	TCRBV29-01*01	TCRBD02-01*01	TCRBJ02-05*01
ATCCAGCCTGCAAAGCTTGAGGACTCGGCCGTGTATCTCTGTGCCAGCAGCTTGCCGGGACAGGGATACGAGCAGTACTTCGGGCCG	CASSLPGQGYEQYF	18	0.00015963	TCRBV11-02*02	TCRBD01-01*01	TCRBJ02-07*01
ACCTTGGAGCTGGGGGACTCGGCCCTTTATCTTTGCGCCAGTTACCCTACTAGCCCAATAAACACCGGGGAGCTGTTTTTTGGAGAA	CASYPTSPINTGELFF	18	0.00015963	TCRBV05-01*01	TCRBD02-01	TCRBJ02-02*01
TTGTTGCTGGGGGACTCGGCCCTGTATCTCTGTGCCAGCAGCTTGGTGGCCAGCGGAACGTTCGGCGGGGAGCTGTTTTTTGGAGAA	CASSLVASGTFGGELFF	18	0.00015963	TCRBV05-05*01	TCRBD02-01	TCRBJ02-02*01
CAGCGCACAGAGCAGGGGGACTCGGCCATGTATCTCTGTGCCAGCAGCTTAGGGGGGACAGGGGAAAACATTCAGTACTTCGGCGCC	CASSLGGTGENIQYF	18	0.00015963	TCRBV07-09	TCRBD01-01*01	TCRBJ02-04*01
ACTCTGACTGTGAGCAACATGAGCCCTGAAGACAGCAGCATATATCTCTGCAGCGTGGACGACAGGGGTGAGGCTTTCTTTGGACAA	CSVDDRGEAFF	18	0.00015963	TCRBV29-01*01	TCRBD01-01*01	TCRBJ01-01*01
CTGGGGTTGGAGTCGGCTGCTCCCTCCCAAACATCTGTGTACTTCTGTGCCAGCAGTTACATCAGGAATGAGCAGTTCTTCGGGCCA	CASSYIRNEQFF	18	0.00015963	TCRBV06	TCRBD01-01*01	TCRBJ02-01*01
AATGTGAGCACCTTGGAGCTGGGGGACTCGGCCCTTTATCTTTGCGCCAGCAGCGTGGGACAGGGCTACGAGCAGTACTTCGGGCCG	CASSVGQGYEQYF	18	0.00015963	TCRBV05-01*01	TCRBD01-01*01	TCRBJ02-07*01
ATCAATTCCCTGGAGCTTGGTGACTCTGCTGTGTATTTCTGTGCCAGCAGCCGATCTAGCGGGGGGGATACGCAGTATTTTGGCCCA	CASSRSSGGDTQYF	18	0.00015963	TCRBV03	TCRBD02-01*01	TCRBJ02-03*01
GAAGACTCAGCCCTGTATCTCTGCGCCAGCAGCCAAGACCCGGGACTAGCGGGGGGCGCGAACACCGGGGAGCTGTTTTTTGGAGAA	CASSQDPGLAGGANTGELFF	18	0.00015963	TCRBV04-01*01	TCRBD02-01*01	TCRBJ02-02*01
AACCCGACAGCTTTCTATCTCTGTGCCAGTAGTACTCCCCTCACAGGGGCAGGGCCGGTTATTAATTCACCCCTCCACTTTGGGAAC	CASSTPLTGAGPVINSPLHF	18	0.00015963	TCRBV19-01	TCRBD01-01*01	TCRBJ01-06*01
TCGGCCCAAAAGAACCCGACAGCTTTCTATCTCTGTGCCAGTAGTATAACCGGGACTAGCGGGGCGGATGAGCAGTTCTTCGGGCCA	CASSITGTSGADEQFF	18	0.00015963	TCRBV19-01	TCRBD02-01*01	TCRBJ02-01*01
CTGGAGTCCGCCAGCACCAACCAGACATCTATGTACCTCTGTGCCAGCAGCAAAACAGGGGGAAGTACTGAAGCTTTCTTTGGACAA	CASSKTGGSTEAFF	18	0.00015963	TCRBV28-01*01	TCRBD01-01*01	TCRBJ01-01*01
CTGGGGTTGGAGTCGGCTGCTCCCTCCCAAACATCTGTGTACTTCTGTGCCAGCAGCCGTTCGGGCGATGGCTACACCTTCGGTTCG	CASSRSGDGYTF	17	0.000150761	TCRBV06	unknown	TCRBJ01-02*01
CGGTCCACAAAGCTGGAGGACTCAGCCATGTACTTCTGTGCCAGCAGTGATCGGACAGGGGGGAATCAGCCCCAGCATTTTGGTGAT	CASSDRTGGNQPQHF	17	0.000150761	TCRBV02-01*01	TCRBD01-01*01	TCRBJ01-05*01
AAGATCCAGCCCTCAGAACCCAGGGACTCAGCTGTGTACTTCTGTGCCAGCAGTTATATCCCGAACACTGAAGCTTTCTTTGGACAA	CASSYIPNTEAFF	17	0.000150761	TCRBV12	TCRBD02-01	TCRBJ01-01*01
ACCCTGCAGCCAGAAGACTCGGCCCTGTATCTCTGTGCCAGCAGCCAAGCTCAGCAGGCGCCTAATGAAAAACTGTTTTTTGGCAGT	CASSQAQQAPNEKLFF	17	0.000150761	TCRBV04-02*01	TCRBD01-01*01	TCRBJ01-04*01
TCTGAGCTGAATGTGAACGCCTTGGAGCTGGACGACTCGGCCCTGTATCTCTGTGCCAGCAGCTTTGGGGTAGCTTTCTTTGGACAA	CASSFGVAFF	17	0.000150761	TCRBV05-04*01	unknown	TCRBJ01-01*01
ATCCTGGAGTCGCCCAGCCCCAACCAGACCTCTCTGTACTTCTGTGCCAGCAGTTCCGAGCCCTACAATGAGCAGTTCTTCGGGCCA	CASSSEPYNEQFF	17	0.000150761	TCRBV27-01*01	TCRBD02-01	TCRBJ02-01*01
CGGTCCACAAAGCTGGAGGACTCAGCCATGTACTTCTGTGCCAGCCTACCTACTAGCGACATCTACAATGAGCAGTTCTTCGGGCCA	CASLPTSDIYNEQFF	17	0.000150761	TCRBV02-01*01	TCRBD02-01	TCRBJ02-01*01
TCCCTAGAGTCTGCCATCCCCAACCAGACAGCTCTTTACTTCTGTGCCACCAGTGGAGGGGGCAATCAGCCCCAGCATTTTGGTGAT	CATSGGGNQPQHF	17	0.000150761	TCRBV24	unknown	TCRBJ01-05*01
CTGAATGTGAACGCCTTGTTGCTAGGGGACTCGGCCCTCTATCTCTGTGCCAGCAGCCAACTAGCGGGGGAGCAGTTCTTCGGGCCA	CASSQLAGEQFF	17	0.000150761	TCRBV05-07*01	TCRBD02-01*01	TCRBJ02-01*01
ACTCTGACAGTGACCAGTGCCCATCCTGAAGACAGCAGCTTCTACATCTGCAGTGCTAGACCCACAGGGGAAGCTTTCTTTGGACAA	CSARPTGEAFF	17	0.000150761	TCRBV20-01*01	TCRBD01-01*01	TCRBJ01-01*01
CTGAAGATCCGGTCCACAAAGCTGGAGGACTCAGCCATGTACTTCTGTGCCAGATCCCGGGACAGAGGGGGCTACACCTTCGGTTCG	CARSRDRGGYTF	17	0.000150761	TCRBV02-01*01	TCRBD01-01*01	TCRBJ01-02*01
GAGTCGGCTGCTCCCTCCCAAACATCTGTGTACTTCTGTGCCAGCAGTTACAGGGGCTCTGGGGCCAACGTCCTGACTTTCGGGGCC	CASSYRGSGANVLTF	17	0.000150761	TCRBV06	TCRBD01-01*01	TCRBJ02-06*01
AAGATCCAGCCTGCAAAGCTTGAGGACTCGGCCGTGTATCTCTGTGCCAGCAGCTTAGATCCAAATTCACCCCTCCACTTTGGGAAC	CASSLDPNSPLHF	17	0.000150761	TCRBV11-02*02	TCRBD01-01*01	TCRBJ01-06*01
CGCACAGAGCAGGGGGACTCGGCCATGTATCTCTGTGCCAGCAGCTTAGACGCGGGGGGGCCGAACGGGGAGCTGTTTTTTGGAGAA	CASSLDAGGPNGELFF	17	0.000150761	TCRBV07-09	TCRBD02-01*01	TCRBJ02-02*01
ACCCTGCAGCCAGAAGACTCGGCCCTGTATCTCTGCGCCAGCAGCCAAGGGCCGCAGGTTCCGAGGGAAGAGCAGTTCTTCGGGCCA	CASSQGPQVPREEQFF	17	0.000150761	TCRBV04-03*01	TCRBD02-01*02	TCRBJ02-01*01
AGGATCCAGCAGGTAGTGCGAGGAGATTCGGCAGCTTATTTCTGTGCCAGCTCACGTCAGAACACCGGGGAGCTGTTTTTTGGAGAA	CASSRQNTGELFF	17	0.000150761	TCRBV18-01*01	TCRBD01-01*01	TCRBJ02-02*01
ACGGAGTCAGGGGACACAGCACTGTATTTCTGTGCCAGCAGCAATTCGCGGGCAGGGGGAAGGAACTATGGCTACACCTTCGGTTCG	CASSNSRAGGRNYGYTF	17	0.000150761	TCRBV21-01*01	TCRBD01-01*01	TCRBJ01-02*01
AAGATCCAGCGCACAGAGCGGGGGGACTCAGCCGTGTATCTCTGTGCCAGCAGCTCTACTGGGACCGGGGAGCTGTTTTTTGGAGAA	CASSSTGTGELFF	17	0.000150761	TCRBV07-03*01	unknown	TCRBJ02-02*01
CTGGAGTTGGCTGCTCCCTCCCAGACATCTGTGTACTTCTGTGCCAGCAGAACCCCGTCGGAGGGAAATGGCTACACCTTCGGTTCG	CASRTPSEGNGYTF	17	0.000150761	TCRBV06-06	TCRBD02-01*02	TCRBJ01-02*01
CACCTACACACCCTGCAGCCAGAAGACTCGGCCCTGTATCTCTGCGCCAGCAGCTCCGGGACGGACTACGAGCAGTACTTCGGGCCG	CASSSGTDYEQYF	17	0.000150761	TCRBV04-03*01	unknown	TCRBJ02-07*01
CATCCTGAAGACAGCAGCTTCTACATCTGCAGTGCTAGGGGCGTCAGGACGACAGTAGACTCTGGAAACACCATATATTTTGGAGAG	CSARGVRTTVDSGNTIYF	17	0.000150761	TCRBV20	TCRBD01-01*01	TCRBJ01-03*01
ACGTTGGCGTCTGCTGTACCCTCTCAGACATCTGTGTACTTCTGTGCCAGCAGTGACACTAGCACAGATACGCAGTATTTTGGCCCA	CASSDTSTDTQYF	17	0.000150761	TCRBV06-04	TCRBD02-01	TCRBJ02-03*01
AAGATCCGGTCCACAAAGCTGGAGGACTCAGCCATGTACTTCTGTGCCAGAGGACAGGGAGGATCCTACGAGCAGTACTTCGGGCCG	CARGQGGSYEQYF	17	0.000150761	TCRBV02-01*01	TCRBD01-01*01	TCRBJ02-07*01
CTGACAGTGACCAGTGCCCATCCTGAAGACAGCAGCTTCTACATCTGCAGTGCTAGCGCGGCGAACACTGAAGCTTTCTTTGGACAA	CSASAANTEAFF	17	0.000150761	TCRBV20	TCRBD02-01	TCRBJ01-01*01
AGGCTGGAGTCGGCTGCTCCCTCCCAGACATCTGTGTACTTCTGTGCCAGCAGTGTGGTACAGGGGCCCGAGCAGTACTTCGGGCCG	CASSVVQGPEQYF	17	0.000150761	TCRBV06-01*01	TCRBD01-01*01	TCRBJ02-07*01
ACAGTGACCAGTGCCCATCCTGAAGACAGCAGCTTCTACATCTGCAGTGCTCCGGGCTCTGGGGCCAACGTCCTGACTTTCGGGGCC	CSAPGSGANVLTF	16	0.000141893	TCRBV20	TCRBD02-01	TCRBJ02-06*01
AATCTTCACATCAATTCCCTGGAGCTTGGTGACTCTGCTGTGTATTTCTGTGCCAGCAGCCAAATGGATGGCTACACCTTCGGTTCG	CASSQMDGYTF	16	0.000141893	TCRBV03	unknown	TCRBJ01-02*01
AGTGCCCATCCTGAAGACAGCAGCTTCTACATCTGCAGTGCTAGAGATGAAGGACAGGGTGTTACCGGGGAGCTGTTTTTTGGAGAA	CSARDEGQGVTGELFF	16	0.000141893	TCRBV20	TCRBD01-01*01	TCRBJ02-02*01
AAGATCCAGCCTGCAAAGCTTGAGGACTCGGCCGTGTATCTCTGTGCCAGCAGCTTGATAGGCAACTATGGCTACACCTTCGGTTCG	CASSLIGNYGYTF	16	0.000141893	TCRBV11-02*02	unknown	TCRBJ01-02*01
ATCCAGCCCTCAGAACCCAGGGACTCAGCTGTGTACTTCTGTGCCAGCACCTCGGGGACTCATCTCGGGAAACTGTTTTTTGGCAGT	CASTSGTHLGKLFF	16	0.000141893	TCRBV12	TCRBD02-01	TCRBJ01-04*01
CTGACAGTGACCAGTGCCCATCCTGAAGACAGCAGCTTCTACATCTGCAGTGCAAACAGGGGACGGGGTGAAGCTTTCTTTGGACAA	CSANRGRGEAFF	16	0.000141893	TCRBV20	TCRBD01-01*01	TCRBJ01-01*01
AAGATCCAGCCCTCAGAACCCAGGGACTCAGCTGTGTACTTCTGTGCCAGCAGTTTCTTGGGAGCCGGGGAGCTGTTTTTTGGAGAA	CASSFLGAGELFF	16	0.000141893	TCRBV12	TCRBD02-01*02	TCRBJ02-02*01
CTGAGCTCTCTGGAGCTGGGGGACTCAGCTTTGTATTTCTGTGCCAGCAGCGTAAGCGACAGTATGAATGAGCAGTTCTTCGGGCCA	CASSVSDSMNEQFF	16	0.000141893	TCRBV09-01	TCRBD01-01*01	TCRBJ02-01*01
AGTGCCCATCCTGAAGACAGCAGCTTCTACATCTGCAGTGCTCCCCCCCCGGCCGGGACCCCAACGGATGGGCAGTTCTTCGGGCCA	CSAPPPAGTPTDGQFF	16	0.000141893	TCRBV20	unknown	TCRBJ02-01*01
ACCAGTGCCCATCCTGAAGACAGCAGCTTCTACATCTGCAGTGCTAGAGTAGCGGGGGCCAGCCGCTACGAGCAGTACTTCGGGCCG	CSARVAGASRYEQYF	16	0.000141893	TCRBV20	TCRBD02-01*01	TCRBJ02-07*01
CTGAGCTCTCTGGAGCTGGGGGACTCAGCTTTGTATTTCTGTGCCAGCAGCCTCCACCCGGGGTCCGGGGAGCTGTTTTTTGGAGAA	CASSLHPGSGELFF	16	0.000141893	TCRBV09-01	TCRBD02-01*01	TCRBJ02-02*01
CTGAAGATCCGGTCCACAAAGCTGGAGGACTCAGCCATGTACTTCTGTGCCAGCAGCGTAAACGTTTACGAGCAGTACTTCGGGCCG	CASSVNVYEQYF	16	0.000141893	TCRBV02-01*01	unknown	TCRBJ02-07*01
CAGCCTGCAAAGCTTGAGGACTCGGCCGTGTATCTCTGTGCCAGCAGCTTCGCGGGACTAGCGGGGGTCGAGCAGTACTTCGGGCCG	CASSFAGLAGVEQYF	16	0.000141893	TCRBV11-02*02	TCRBD02-01*01	TCRBJ02-07*01
TCTCTGGAGCTGGGGGACTCAGCTTTGTATTTCTGTGCCAGCAGCGTCGGGGGGACAGCTAGTACCTATGGCTACACCTTCGGTTCG	CASSVGGTASTYGYTF	16	0.000141893	TCRBV09-01	unknown	TCRBJ01-02*01
GTGAACGCCTTGTTGCTGGGGGACTCGGCCCTCTATCTCTGTGCCAGCAGCCCTGGACAGGGGTGGCGGGAGCAGTACTTCGGGCCG	CASSPGQGWREQYF	16	0.000141893	TCRBV05-06*01	TCRBD01-01*01	TCRBJ02-07*01
GCCTTGTTGCTGGGGGACTCGGCCCTCTATCTCTGTGCCAGCAGCCCTGGACAGGGGGCTGCTGGAAACACCATATATTTTGGAGAG	CASSPGQGAAGNTIYF	16	0.000141893	TCRBV05-06*01	TCRBD01-01*01	TCRBJ01-03*01
CTGACAGTGACCAGTGCCCATCCTGAAGACAGCAGCTTCTACATCTGCAGTGCTAGGGCGGGGAATCAGCCCCAGCATTTTGGTGAT	CSARAGNQPQHF	16	0.000141893	TCRBV20	TCRBD02-01*01	TCRBJ01-05*01
CCTGCAGAACTGGAGGATTCTGGAGTTTATTTCTGTGCCAGCAGCCAAGCTACCGACAGGGGAGGGTTCGGCTACACCTTCGGTTCG	CASSQATDRGGFGYTF	16	0.000141893	TCRBV14-01*01	TCRBD01-01*01	TCRBJ01-02*01
ACATCGGCCCAAAAGAACCCGACAGCTTTCTATCTCTGTGCCAGTAGTATTGCGGGGGGGCACACCGGGGAGCTGTTTTTTGGAGAA	CASSIAGGHTGELFF	16	0.000141893	TCRBV19-01	TCRBD02-01*01	TCRBJ02-02*01
CAAAAGAACCCGACAGCTTTCTATCTCTGTGCCAGTAGTGTGGGTCGACTAGCGGGGGGGAACACCGGGGAGCTGTTTTTTGGAGAA	CASSVGRLAGGNTGELFF	16	0.000141893	TCRBV19-01	TCRBD02-01*01	TCRBJ02-02*01
ATCCAGCCTGCAAAGCTTGAGGACTCGGCCGTGTATCTCTGTGCCAGCAGCCCACAGGGGAGAAATTCACCCCTCCACTTTGGGAAC	CASSPQGRNSPLHF	16	0.000141893	TCRBV11-02*02	TCRBD01-01*01	TCRBJ01-06*01
CAGGTAGTGCGAGGAGATTCGGCAGCTTATTTCTGTGCCAGCTCACCACTCTTGGAGGGAATGAACACTGAAGCTTTCTTTGGACAA	CASSPLLEGMNTEAFF	16	0.000141893	TCRBV18-01*01	TCRBD02-01*02	TCRBJ01-01*01
AATGTGAGCACCTTGGAGCTGGGGGACTCGGCCCTTTATCTTTGCGCCAGCAGCTTCGGGACAGCATATGGCTACACCTTCGGTTCG	CASSFGTAYGYTF	16	0.000141893	TCRBV05-01*01	TCRBD01-01*01	TCRBJ01-02*01
AAGATCCGGTCCACAAAGCTGGAGGACTCAGCCATGTACTTCTGTGCCAGCGCGACACTGAACACCGGGGAGCTGTTTTTTGGAGAA	CASATLNTGELFF	16	0.000141893	TCRBV02-01*01	TCRBD01-01*01	TCRBJ02-02*01
GGGTTGGAGTCGGCTGCTCCCTCCCAAACATCTGTGTACTTCTGTGCCACCCTCCAGGGTTCGGGAGAGACCCAGTACTTCGGGCCA	CATLQGSGETQYF	16	0.000141893	TCRBV06	TCRBD01-01*01	TCRBJ02-05*01
CTGGAGTCGCCCAGCCCCAACCAGACCTCTCTGTACTTCTGTGCCAGCAGTCCAGTCGACAGTTTAGAGACCCAGTACTTCGGGCCA	CASSPVDSLETQYF	16	0.000141893	TCRBV27-01*01	TCRBD01-01*01	TCRBJ02-05*01
CTGGAGTCGCCCAGCCCCAACCAGACCTCTCTGTACTTCTGTGCCAGCAGTCTCATAGGGGGGCCCGGGGAGCTGTTTTTTGGAGAA	CASSLIGGPGELFF	16	0.000141893	TCRBV27-01*01	unknown	TCRBJ02-02*01
TCTGAGATGAATGTGAGCACCTTGGAGCTGGGGGACTCGGCCCTTTATCTTTGCGCCAGGCACCCCCCCTGCCACACCTTCGGTTCG	CARHPPCHTF	16	0.000141893	TCRBV05-01*01	unknown	TCRBJ01-02*01
GAGTCCGCCAGCACCAACCAGACATCTATGTACCTCTGTGCCAGCAGTGGCTGGGTGAACTCTGGAAACACCATATATTTTGGAGAG	CASSGWVNSGNTIYF	16	0.000141893	TCRBV28-01*01	unknown	TCRBJ01-03*01
ACGATTCAGCGCACAGAGCAGCGGGACTCAGCCATGTATCGCTGTGCCAGCAGCTACGACAGGGGGGCCGAGCAGTACTTCGGGCCG	CASSYDRGAEQYF	16	0.000141893	TCRBV07-07*01	TCRBD01-01*01	TCRBJ02-07*01
ATCCAGCCTGCAGAGCTTGGGGACTCGGCCATGTATCTCTGTGCCAGCAGCTTAACCGCCTACCCAGGGCAAGCTTTCTTTGGACAA	CASSLTAYPGQAFF	16	0.000141893	TCRBV11-01*01	TCRBD01-01*01	TCRBJ01-01*01
ATCAATTCCCTGGAGCTTGGTGACTCTGCTGTGTATTTCTGTGCCAGCAGCCAAGTTACCAGGGGTGAGACCCAGTACTTCGGGCCA	CASSQVTRGETQYF	16	0.000141893	TCRBV03	TCRBD01-01*01	TCRBJ02-05*01
CGCACAGAGCAGCGGGACTCAGCCATGTATCGCTGTGCCAGCAGCTCGGGAAGACTAGTAAACACCGGGGAGCTGTTTTTTGGAGAA	CASSSGRLVNTGELFF	16	0.000141893	TCRBV07-07*01	TCRBD02-01	TCRBJ02-02*01
GTGAGCACCTTGGAGCTGGGGGACTCGGCCCTTTATCTTTGCGCCAGCAGCCCCTCCCCTGGAAACTATGGCTACACCTTCGGTTCG	CASSPSPGNYGYTF	16	0.000141893	TCRBV05-01*01	unknown	TCRBJ01-02*01
CTGACTGTGAGCAACATGAGCCCTGAAGACAGCAGCATATATCTCTGCAGCGTCTCGACTAGCTTCTACGAGCAGTACTTCGGGCCG	CSVSTSFYEQYF	16	0.000141893	TCRBV29-01*01	TCRBD02-01	TCRBJ02-07*01
CTGGAGTCCGCCAGCACCAACCAGACATCTATGTACCTCTGTGCCAGCAGTTTATTACAGAGCAATCAGCCCCAGCATTTTGGTGAT	CASSLLQSNQPQHF	16	0.000141893	TCRBV28-01*01	TCRBD01-01*01	TCRBJ01-05*01
AAGATCCAGCCCTCAGAACCCAGGGACTCAGCTGTGTATTTTTGTGCTAGTGGTTTGGTTGGGGACACTGAAGCTTTCTTTGGACAA	CASGLVGDTEAFF	16	0.000141893	TCRBV12-05*01	unknown	TCRBJ01-01*01
CCCTCAGAACCCAGGGACTCAGCTGTGTACTTCTGTGCCAGCAGTTTGGTGGGGCGGGAGTTGAACACTGAAGCTTTCTTTGGACAA	CASSLVGRELNTEAFF	16	0.000141893	TCRBV12	TCRBD02-01*02	TCRBJ01-01*01
CCTGCAAAGCTTGAGGACTCGGCCGTGTATCTCTGTGCCAGCAGCCCTCAGGGGCGGGGGAGCCAAGAGACCCAGTACTTCGGGCCA	CASSPQGRGSQETQYF	16	0.000141893	TCRBV11-02*02	TCRBD02-01*01	TCRBJ02-05*01
CAGCCCTCAGAACCCAGGGACTCAGCTGTGTACTTCTGTGCCAGCAGTTTAATAGCGGGGGTTAACAATGAGCAGTTCTTCGGGCCA	CASSLIAGVNNEQFF	16	0.000141893	TCRBV12	TCRBD02-01*01	TCRBJ02-01*01
CACACCCTGCAGCCAGAAGACTCGGCCCTGTATCTCTGCGCCAGCAGCCAAGATTCCGGGACAGCTTACGAGCAGTACTTCGGGCCG	CASSQDSGTAYEQYF	15	0.000133025	TCRBV04-03*01	TCRBD01-01*01	TCRBJ02-07*01
CTGGAGTCGGCTGCTCCCTCCCAGACATCTGTGTACTTCTGTGCCAGCAGTGTCGGACAGGGGGCCTACGGCTACACCTTCGGTTCG	CASSVGQGAYGYTF	15	0.000133025	TCRBV06-01*01	TCRBD01-01*01	TCRBJ01-02*01
ACGTTGGCGTCTGCTGTACCCTCTCAGACATCTGTGTACTTCTGTGCCAGCGGGGGGGCGGGCACAGATACGCAGTATTTTGGCCCA	CASGGAGTDTQYF	15	0.000133025	TCRBV06-04	TCRBD02-01*01	TCRBJ02-03*01
AGTGCCCATCCTGAAGACAGCAGCTTCTACATCTGCAGTGCCTCCCGACAGAGCGGGGGGTACAACAATGAGCAGTTCTTCGGGCCA	CSASRQSGGYNNEQFF	15	0.000133025	TCRBV20	TCRBD02-01*01	TCRBJ02-01*01
CACCTACACACCCTGCAGCCAGAAGACTCGGCCCTGTATCTCTGCGCCAGCAGCCAAAACGGGGACAGTGAGCAGTTCTTCGGGCCA	CASSQNGDSEQFF	15	0.000133025	TCRBV04-03*01	TCRBD01-01*01	TCRBJ02-01*01
CAGGTAGTGCGAGGAGATTCGGCAGCTTATTTCTGTGCCAGCTCACCTGGGCGTTTGCGGGATAATTCACCCCTCCACTTTGGGAAC	CASSPGRLRDNSPLHF	15	0.000133025	TCRBV18-01*01	TCRBD02-01	TCRBJ01-06*01
CTGACAGTGACCAGTGCCCATCCTGAAGACAGCAGCTTCTACATCTGCAGTGCTAGAGAGTCGTATTCACCCCTCCACTTTGGGAAC	CSARESYSPLHF	15	0.000133025	TCRBV20	TCRBD02-01	TCRBJ01-06*01
TCGGCCCAAAAGAACCCGACAGCTTTCTATCTCTGTGCCACACAGGACAGGGTCAAAACGGATCATCAGCCCCAGCATTTTGGTGAT	CATQDRVKTDHQPQHF	15	0.000133025	TCRBV19-01	TCRBD01-01*01	TCRBJ01-05*01
TTGGAGCTGGGGGACTCGGCCCTTTATCTTTGCGCCAGCAGCTTGATCGAGCCCCGACAGGGGGTGTACGAGCAGTACTTCGGGCCG	CASSLIEPRQGVYEQYF	15	0.000133025	TCRBV05-01*01	TCRBD01-01*01	TCRBJ02-07*01
CGGTCCACAAAGCTGGAGGACTCAGCCATGTACTTCTGTGCCAGTAACACAGGTCCCGGGCTTGGTTACGAGCAGTACTTCGGGCCG	CASNTGPGLGYEQYF	15	0.000133025	TCRBV02-01*01	TCRBD01-01*01	TCRBJ02-07*01
CACCTACACACCCTGCAGCCAGAAGACTCGGCCCTGTATCTCTGCGCCAGCAGCTCAAGGGGGGGGGCTGAAGCTTTCTTTGGACAA	CASSSRGGAEAFF	15	0.000133025	TCRBV04-03*01	TCRBD02-01*01	TCRBJ01-01*01
CTGGAGCTGGGGGACTCAGCTTTGTATTTCTGTGCCAGCAGCGTGGCCAGAGGGACTAGCGGGGCAGATACGCAGTATTTTGGCCCA	CASSVARGTSGADTQYF	15	0.000133025	TCRBV09-01	TCRBD02-01*01	TCRBJ02-03*01
TTGGAGCTGGGGGACTCGGCCCTTTATCTTTGCGCCAGCAGCTTGGACCTTCCGGGACAGCCCAATTCACCCCTCCACTTTGGGAAC	CASSLDLPGQPNSPLHF	15	0.000133025	TCRBV05-01*01	TCRBD01-01*01	TCRBJ01-06*01
GAGTCAGCTACCCGCTCCCAGACATCTGTGTATTTCTGCGCCAGCAGAGCCAGACAGGGAGTCACAGATACGCAGTATTTTGGCCCA	CASRARQGVTDTQYF	15	0.000133025	TCRBV10-02*01	TCRBD01-01*01	TCRBJ02-03*01
CTGGAGTCAGCTACCCGCTCCCAGACATCTGTGTATTTCTGCGCCAGCAGTGGGGCTAGTGGGGACACTGAAGCTTTCTTTGGACAA	CASSGASGDTEAFF	15	0.000133025	TCRBV10-02*01	unknown	TCRBJ01-01*01
CCCAGCCCCAACCAGACCTCTCTGTACTTCTGTGCCAGCAGTCTCGTCCCTACGGATGATGGGAGATATGGCTACACCTTCGGTTCG	CASSLVPTDDGRYGYTF	15	0.000133025	TCRBV27-01*01	TCRBD02-01*02	TCRBJ01-02*01
ATCCAGCCTGCAAAGCTTGAGGACTCGGCCGTGTATCTCTGTGCCAGCAGCTTAGATAACAGCATCTATGGCTACACCTTCGGTTCG	CASSLDNSIYGYTF	15	0.000133025	TCRBV11-02*02	TCRBD01-01*01	TCRBJ01-02*01
CACACCCTGCAGCCAGAAGACTCGGCCCTGTATCTCTGCGCCAGCAGCCAAGAAGAGGGAAGCTCCTACGAGCAGTACTTCGGGCCG	CASSQEEGSSYEQYF	15	0.000133025	TCRBV04-03*01	TCRBD02-01*02	TCRBJ02-07*01
GCTGCTCCCTCCCAAACATCTGTGTACTTCTGTGCCAGCAGTCGCGCAATCGGCGGGGGGGCCTTAAACGAGCAGTACTTCGGGCCG	CASSRAIGGGALNEQYF	15	0.000133025	TCRBV06	TCRBD02-01*01	TCRBJ02-07*01
AAGATCCAGCCTGCAAAGCTTGAGGACTCGGCCGTGTATCTCTGTGCCAGCAGCTCGTGGAGGGGCTACGAGCAGTACTTCGGGCCG	CASSSWRGYEQYF	15	0.000133025	TCRBV11-02*02	TCRBD02-01*02	TCRBJ02-07*01
GTGAGCACCTTGGAGCTGGGGGACTCGGCCCTTTATCTTTGCGCCAGCAGCTTGGTAGTTTCCCCCTACGAGCAGTACTTCGGGCCG	CASSLVVSPYEQYF	15	0.000133025	TCRBV05-01*01	TCRBD02-01	TCRBJ02-07*01
AGCTCTCTGGAGCTGGGGGACTCAGCTTTGTATTTCTGTGCCAGCAGCGTAGGGACTCTAGGACGGGAGACCCAGTACTTCGGGCCA	CASSVGTLGRETQYF	15	0.000133025	TCRBV09-01	TCRBD02-01	TCRBJ02-05*01
CTGGAGTCCGCCAGCACCAACCAGACATCTATGTACCTCTGTGCCAGCTACGACAGGACGAACACCGGGGAGCTGTTTTTTGGAGAA	CASYDRTNTGELFF	15	0.000133025	TCRBV28-01*01	TCRBD01-01*01	TCRBJ02-02*01
ATCCGGTCCACAAAGCTGGAGGACTCAGCCATGTACTTCTGTGCCAGCAGAGCAGGACTAGCGGGGGGGGAGCAGTACTTCGGGCCG	CASRAGLAGGEQYF	15	0.000133025	TCRBV02-01*01	TCRBD02-01*01	TCRBJ02-07*01
CTTCACATCAATTCCCTGGAGCTTGGTGACTCTGCTGTGTATTTCTGTGCCAGCAGCCGCAGGGGCCACGAGCAGTACTTCGGGCCG	CASSRRGHEQYF	15	0.000133025	TCRBV03	TCRBD01-01*01	TCRBJ02-07*01
AGGATCCAGCAGGTAGTGCGAGGAGATTCGGCAGCTTATTTCTGTGCCAGCTCACCACACCCAGGGCGCGGCTACACCTTCGGTTCG	CASSPHPGRGYTF	15	0.000133025	TCRBV18-01*01	TCRBD01-01*01	TCRBJ01-02*01
AAGATCCGGTCCACAAAGCTGGAGGACTCAGCCATGTACTTCTGTGCCAGCAGTCAGGGAGAGAACACTGAAGCTTTCTTTGGACAA	CASSQGENTEAFF	15	0.000133025	TCRBV02-01*01	unknown	TCRBJ01-01*01
ATCCAGCCCTCAGAACCCAGGGACTCAGCTGTGTACTTCTGTGCCAGCGGGGGGTCAACGGGGCTTAATGAGCAGTTCTTCGGGCCA	CASGGSTGLNEQFF	15	0.000133025	TCRBV12	TCRBD02-01*01	TCRBJ02-01*01
GCCCATCCTGAAGACAGCAGCTTCTACATCTGCAGTGCTAGCCCAAGGACAGAGAGCTCCTATAATTCACCCCTCCACTTTGGGAAC	CSASPRTESSYNSPLHF	15	0.000133025	TCRBV20	TCRBD01-01*01	TCRBJ01-06*01
GAGATCCAGCGCACAGAGCAGGGGGACTCGGCCATGTATCTCTGTGCCAGCAGCTTTCAACAGGACACTGAAGCTTTCTTTGGACAA	CASSFQQDTEAFF	15	0.000133025	TCRBV07-09	TCRBD01-01*01	TCRBJ01-01*01
AAATCTCCAGACAAAGCTCATTTAAATCTTCACATCAATTCCCTGGAGCTTGGTGCCCAGGGAGGAAACACCATATATTTTGGAGAG	IYF	15	0.000133025	TCRBV03	TCRBD01-01*01	TCRBJ01-03*01
CTCACTCTGGAGTCAGCTACCCGCTCCCAGACATCTGTGTATTTCTGCGCCAGCGGTCGGGACAGCTATGGCTACACCTTCGGTTCG	CASGRDSYGYTF	15	0.000133025	TCRBV10-02*01	TCRBD01-01*01	TCRBJ01-02*01
ATCCTGGAGTCGCCCAGCCCCAACCAGACCTCTCTGTACTTCTGTGCCAGCAGTTTCCAAGGTCCGGAAGGCTACACCTTCGGTTCG	CASSFQGPEGYTF	15	0.000133025	TCRBV27-01*01	unknown	TCRBJ01-02*01
ATCCAGGCTACGAAGCTTGAGGATTCAGCAGTGTATTTTTGTGCCAGCAGCCTACACAGGGTGAACACTGAAGCTTTCTTTGGACAA	CASSLHRVNTEAFF	15	0.000133025	TCRBV16-01	TCRBD01-01*01	TCRBJ01-01*01
ATCCAGCGCACACAGCAGGAGGACTCCGCCGTGTATCTCTGTGCCAGCAGCTTACTACAGGGACCCTACGAGCAGTACTTCGGGCCG	CASSLLQGPYEQYF	15	0.000133025	TCRBV07-08*01	TCRBD01-01*01	TCRBJ02-07*01
GAGTTGGCTGCTCCCTCCCAGACATCTGTGTACTTCTGTGCCAGCATAGGGTCCCTACTTTTGAACACTGAAGCTTTCTTTGGACAA	CASIGSLLLNTEAFF	15	0.000133025	TCRBV06-06	unknown	TCRBJ01-01*01
CTGTCGGCTGCTCCCTCCCAGACATCTGTGTACTTCTGTGCCAGCAGTTACGGGCCAGAAGCCAAAAACATTCAGTACTTCGGCGCC	CASSYGPEAKNIQYF	15	0.000133025	TCRBV06-05*01	TCRBD01-01*01	TCRBJ02-04*01
ACCAGTGCCCATCCTGAAGACAGCAGCTTCTACATCTGCAGTGCTAGAGCGGGGGGCGCGCGGAACACTGAAGCTTTCTTTGGACAA	CSARAGGARNTEAFF	15	0.000133025	TCRBV20	TCRBD02-01*01	TCRBJ01-01*01
CACACCCTGCAGCCAGAAGACTCGGCCCTGTATCTCTGCGCCAGCAGCCAAGCGGCCGGGGTGGGCTACGAGCAGTACTTCGGGCCG	CASSQAAGVGYEQYF	15	0.000133025	TCRBV04-03*01	TCRBD02-01*01	TCRBJ02-07*01
ACAGTGACCAGTGCCCATCCTGAAGACAGCAGCTTCTACATCTGCAGTGCCCGGAGACAGGTGAACACTGAAGCTTTCTTTGGACAA	CSARRQVNTEAFF	15	0.000133025	TCRBV20	TCRBD01-01*01	TCRBJ01-01*01
TCGGCTGCTCCCTCCCAGACATCTGTGTACTTCTGTGCCAGCAGTGAAGCCTGGGACAGGGGAATAAACGAGCAGTACTTCGGGCCG	CASSEAWDRGINEQYF	15	0.000133025	TCRBV06-01*01	TCRBD01-01*01	TCRBJ02-07*01
TTGGCGTCTGCTGTACCCTCTCAGACATCTGTGTACTTCTGTGCCAGCAGCTCCGGGACTAGCACCGGGGAGCTGTTTTTTGGAGAA	CASSSGTSTGELFF	15	0.000133025	TCRBV06-04	TCRBD02-01	TCRBJ02-02*01
GAGATCCAGCGCACAGAGCAGGGGGACTCGGCCATGTATCTCTGTGCCACCTCGGGGGCGAAGGGTAATGAGCAGTTCTTCGGGCCA	CATSGAKGNEQFF	14	0.000124156	TCRBV07-09	unknown	TCRBJ02-01*01
AGCACCTTGGAGCTGGGGGACTCGGCCCTTTATCTTTGCGCCAGCAGCTTTTCTAGCGGGGGGGCCCAGACCCAGTACTTCGGGCCA	CASSFSSGGAQTQYF	14	0.000124156	TCRBV05-01*01	TCRBD02-01*01	TCRBJ02-05*01
AGCACCTTGGAGCTGGGGGACTCGGCCCTTTATCTTTGCGCCAGCAGCCCCCAGGCGCCCCGAAACTATGGCTACACCTTCGGTTCG	CASSPQAPRNYGYTF	14	0.000124156	TCRBV05-01*01	TCRBD01-01*01	TCRBJ01-02*01
ACCAGTGCCCATCCTGAAGACAGCAGCTTCTACATCTGCAGTGCTCCCCGGACGGGGGGAAAAAATTCACCCCTCCACTTTGGGAAC	CSAPRTGGKNSPLHF	14	0.000124156	TCRBV20	TCRBD02-01*01	TCRBJ01-06*01
CAGTCCACGGAGTCAGGGGACACAGCACTGTATTTCTGTGCCAGCAAGGCGGGGGATATCTTGGTGAATGAGCAGTTCTTCGGGCCA	CASKAGDILVNEQFF	14	0.000124156	TCRBV21-01*01	TCRBD02-01*01	TCRBJ02-01*01
ACCTTGGAGCTGGGGGACTCGGCCCTTTATCTTTGCGCCAGCAGCTTGGGGGACACCTTCTCTGGAAACACCATATATTTTGGAGAG	CASSLGDTFSGNTIYF	14	0.000124156	TCRBV05-01*01	TCRBD01-01*01	TCRBJ01-03*01
CTTGACATCCGCTCACCAGGCCTGGGGGACGCAGCCATGTACCTGTGTGCCACCAGCAGAGACACAGATACGCAGTATTTTGGCCCA	CATSRDTDTQYF	14	0.000124156	TCRBV15-01*01	unknown	TCRBJ02-03*01
CTTCACATCAATTCCCTGGAGCTTGGTGACTCTGCTGTGTATTTCTGTGCCAGCAGTTTCGGGGACACTGAAGCTTTCTTTGGACAA	CASSFGDTEAFF	14	0.000124156	TCRBV03	TCRBD02-01*01	TCRBJ01-01*01
CTGGAGGATTCTGGAGTTTATTTCTGTGCCAGCAGCCAAGGGTCTCTCACACCGTTTTCTGGGGCCAACGTCCTGACTTTCGGGGCC	CASSQGSLTPFSGANVLTF	14	0.000124156	TCRBV14-01*01	TCRBD01-01*01	TCRBJ02-06*01
GTACCCTCTCAGACATCTGTGTACTTCTGTGCCAGCAGTGACACGGGACTAGCGGGGGAAAACACCGGGGAGCTGTTTTTTGGAGAA	CASSDTGLAGENTGELFF	14	0.000124156	TCRBV06-04	TCRBD02-01*01	TCRBJ02-02*01
CAGCGCACAGAGCGGGGGGACTCAGCCGTGTATCTCTGTGCCAGCAGTCGTACGGGACCTAACACCGGGGAGCTGTTTTTTGGAGAA	CASSRTGPNTGELFF	14	0.000124156	TCRBV07-03*01	unknown	TCRBJ02-02*01
GAGTCTGCCATCCCCAACCAGACAGCTCTTTACTTCTGTGCCACCAGCGAGACGGGGGCCAGCACAGATACGCAGTATTTTGGCCCA	CATSETGASTDTQYF	14	0.000124156	TCRBV24	unknown	TCRBJ02-03*01
AGGATCCAGCAGGTAGTGCGAGGAGATTCGGCAGCTTATTTCTGTGCCAGCACACGGGACGGGATCACTGAAGCTTTCTTTGGACAA	CASTRDGITEAFF	14	0.000124156	TCRBV18-01*01	unknown	TCRBJ01-01*01
GCCCTGCAGCCAGAAGACTCAGCCCTGTATCTCTGCGCCAGCAGTTCGGACAGGGGGTTGTCTAATGAAAAACTGTTTTTTGGCAGT	CASSSDRGLSNEKLFF	14	0.000124156	TCRBV04-01*01	TCRBD01-01*01	TCRBJ01-04*01
ACTCTGACGATCCAGCGCACACAGCAGGAGGACTCGGCCGTGTATCTCTGTGCCAGCAGCAGCACAGATACGCAGTATTTTGGCCCA	CASSSTDTQYF	14	0.000124156	TCRBV07-02*01	unknown	TCRBJ02-03*01
ACATCGGCCCAAAAGAACCCGACAGCTTTCTATCTCTGTGCCAGTAGAACAGACCCAGGGCCTAATGAAAAACTGTTTTTTGGCAGT	CASRTDPGPNEKLFF	14	0.000124156	TCRBV19-01	TCRBD01-01*01	TCRBJ01-04*01
ATCCAGCGCACAGAGCAGGGGGACTCGGCCATGTATCTCTGTGCCAGCACAAAAGCGGGAATGAACACTGAAGCTTTCTTTGGACAA	CASTKAGMNTEAFF	14	0.000124156	TCRBV07-09	TCRBD02-01*02	TCRBJ01-01*01
AACCTGAGCTCTCTGGAGCTGGGGGACTCAGCTTTGTATTTCTGTGCCAGCAGCGCTACGGTATCCGATACGCAGTATTTTGGCCCA	CASSATVSDTQYF	14	0.000124156	TCRBV09-01	TCRBD02-01	TCRBJ02-03*01
ACACAGCAGGAGGACTCGGCCGTGTATCTCTGTGCCAGCAGCACTGGACTAGCGGGGGGCCTAAGTGGGGAGCAGTACTTCGGGCCG	CASSTGLAGGLSGEQYF	14	0.000124156	TCRBV07-02*01	TCRBD02-01*01	TCRBJ02-07*01
AATCTTCACATCAATTCCCTGGAGCTTGGTGACTCTGCTGTGTATTTCTGTGCCAGCAGCGATACAGGGGAGGCTTTCTTTGGACAA	CASSDTGEAFF	14	0.000124156	TCRBV03	TCRBD01-01*01	TCRBJ01-01*01
TTGGAGATCCAGCGCACAGAGCAGGGGGACTCGGCCATGTATCTCTGTGCCAGCAGCCCAGACTCCGGCGGGCAGTACTTCGGGCCG	CASSPDSGGQYF	14	0.000124156	TCRBV07-09	TCRBD02-01	TCRBJ02-07*01
CTGACAGTGACCAGTGCCCATCCTGAAGACAGCAGCTTCTACATCTGCAGTGCTAGAGATGGGAGGGCTGAAGCTTTCTTTGGACAA	CSARDGRAEAFF	14	0.000124156	TCRBV20	TCRBD02-01*02	TCRBJ01-01*01
ATCCAGCGCACACAGCAGGAGGACTCGGCCGTGTATCTCTGTGCCAGCAGCTTAGGCGACACGAAGGCGCGAGCTTTCTTTGGACAA	CASSLGDTKARAFF	14	0.000124156	TCRBV07-02*01	TCRBD01-01*01	TCRBJ01-01*01
CTGCAGCCAGAAGACTCAGCCCTGTATCTCTGCGCCAGCAGCCAAGATCGGTCCAACTCTGGGGCCAACGTCCTGACTTTCGGGGCC	CASSQDRSNSGANVLTF	14	0.000124156	TCRBV04-01*01	TCRBD02-01	TCRBJ02-06*01
CTTCACCTACACGCCCTGCAGCCAGAAGACTCAGCCCTGTATCTCTGCGCCAGCAGCCAAGGACGGGGGGAGCAGTTCTTCGGGCCA	CASSQGRGEQFF	14	0.000124156	TCRBV04-01*01	TCRBD02-01*01	TCRBJ02-01*01
CAGCGCACACAGCAGGAGGACTCCGCCGTGTATCTCTGTGCCAGCAGCCCTAGAAATTGGAGGCTCTATGGCTACACCTTCGGTTCG	CASSPRNWRLYGYTF	14	0.000124156	TCRBV07-08*01	TCRBD02-01*02	TCRBJ01-02*01
GTAGTGCGAGGAGATTCGGCAGCTTATTTCTGTGCCAGCTCACCAAATACGGGACTGAACTCTGGAAACACCATATATTTTGGAGAG	CASSPNTGLNSGNTIYF	14	0.000124156	TCRBV18-01*01	TCRBD02-01	TCRBJ01-03*01
TCGGCTGCTCCCTCCCAGACATCTGTGTACTTCTGTGCCAGCAGTTACGTCCGGACAGGGGGAGGCTATGGCTACACCTTCGGTTCG	CASSYVRTGGGYGYTF	14	0.000124156	TCRBV06-05*01	TCRBD01-01*01	TCRBJ01-02*01
GAGTCTGCCAGGCCCTCACATACCTCTCAGTACCTCTGTGCCAGCAGTGAATACGGGAGCATGAACACTGAAGCTTTCTTTGGACAA	CASSEYGSMNTEAFF	14	0.000124156	TCRBV25-01*01	TCRBD02-01*02	TCRBJ01-01*01
ACTCTGGAGTCTGCTGCCTCCTCCCAGACATCTGTATATTTCTGCGCCAGCCGTCAGATGTTCGGATATGGCTACACCTTCGGTTCG	CASRQMFGYGYTF	14	0.000124156	TCRBV10-01	unknown	TCRBJ01-02*01
CCGCTCAGGCTGGAGTTGGCTGCTCCCTCCCAGACATCTGTGTACTTCTGTGCCAGCCTTGCTGGCAATGAGCAGTTCTTCGGGCCA	CASLAGNEQFF	14	0.000124156	TCRBV06-06	unknown	TCRBJ02-01*01
ACACAGCAGGAGGACTCGGCCGTGTATCTCTGTGCCAGCAGCCGAAAGGGGACTAGCGGGGTCGTGGAGACCCAGTACTTCGGGCCA	CASSRKGTSGVVETQYF	14	0.000124156	TCRBV07-02*01	TCRBD02-01*01	TCRBJ02-05*01
GAGCAGGGGGACTCGGCCATGTATCTCTGTGCCAGCAGCTTAGCGGGGACTAGCGGGGGTTTATCCTACGAGCAGTACTTCGGGCCG	CASSLAGTSGGLSYEQYF	14	0.000124156	TCRBV07-09	TCRBD02-01*01	TCRBJ02-07*01
TCCCTGGAGCTTGGTGACTCTGCTGTGTATTTCTGTGCCAGCAGCCAACGCCGGGGGGCCTACACAGATACGCAGTATTTTGGCCCA	CASSQRRGAYTDTQYF	14	0.000124156	TCRBV03	TCRBD02-01*01	TCRBJ02-03*01
ACCAGTGCCCATCCTGAAGACAGCAGCTTCTACATCTGCAGTGCTAGAGATCGGAAGGGGGGAGGACAGCCCCAGCATTTTGGTGAT	CSARDRKGGGQPQHF	14	0.000124156	TCRBV20	unknown	TCRBJ01-05*01
CTGGAGTCGCCCAGCCCCAACCAGACCTCTCTGTACTTCTGTGCCAGCAGTCGTCTAGCGGGGGATGATTCTCAGTATTTTGGCCCA	CASSRLAGDDSQYF	14	0.000124156	TCRBV27-01*01	TCRBD02-01*01	TCRBJ02-03*01
ATCCTGTCCTCAGAACCGGGAGACACGGCACTGTATCTCTGCGCCAGCAGTCAATCGGGGGAGGACACTGAAGCTTTCTTTGGACAA	CASSQSGEDTEAFF	14	0.000124156	TCRBV23-01*01	TCRBD02-01*02	TCRBJ01-01*01
CAGCCTGCAAAGCTTGAGGACTCGGCCGTGTATCTCTGTGCCAGCAGCTTAGAGGGGAACACGGGCTATGGCTACACCTTCGGTTCG	CASSLEGNTGYGYTF	14	0.000124156	TCRBV11-02*02	unknown	TCRBJ01-02*01
CAGCAGGTAGTGCGAGGAGATTCGGCAGCTTATTTCTGTGCCAGCTCACCAACAAGGGGAGCAGCCTACGAGCAGTACTTCGGGCCG	CASSPTRGAAYEQYF	14	0.000124156	TCRBV18-01*01	unknown	TCRBJ02-07*01
CAGCGCACAGAGCAGGGGGACTCGGCCATGTATCTCTGTGCCAGCAGCTTAGTACCGGGGATTAATGAAAAACTGTTTTTTGGCAGT	CASSLVPGINEKLFF	14	0.000124156	TCRBV07-09	TCRBD02-01*01	TCRBJ01-04*01
ACCCTGGAGTCTGCCAGGCCCTCACATACCTCTCAGTACCTCTGTGCCAGCAGGGGGGAGTATAATTCACCCCTCCACTTTGGGAAC	CASRGEYNSPLHF	14	0.000124156	TCRBV25-01*01	unknown	TCRBJ01-06*01
CAGCCCTCAGAACCCAGGGACTCAGCTGTGTACTTCTGTGCCAGCAGTTCCCTCGACCCCTCCCGGAATGGCTACACCTTCGGTTCG	CASSSLDPSRNGYTF	14	0.000124156	TCRBV12	unknown	TCRBJ01-02*01
CAGCCCTCAGAACCCAGGGACTCAGCTGTGTACTTCTGTGCCAGCAGAATAGCGGGGGGGAACACCGGGGAGCTGTTTTTTGGAGAA	CASRIAGGNTGELFF	14	0.000124156	TCRBV12	TCRBD02-01*01	TCRBJ02-02*01
CTGAAGATCCAGCCCTCAGAACCCAGGGACTCAGCTGTGTACTTCTGTGCCAGCAGATCTACCAGTAGGGGCTACACCTTCGGTTCG	CASRSTSRGYTF	14	0.000124156	TCRBV12	unknown	TCRBJ01-02*01
TTAAATCTTCACATCAATTCCCTGGAGCTTGGTGACTCTGCTGTGTATTTCTGTGCCAGCAGCAGCTACGAGCAGTACTTCGGGCCG	CASSSYEQYF	14	0.000124156	TCRBV03	unknown	TCRBJ02-07*01
CAGCAGGTAGTGCGAGGAGATTCGGCAGCTTATTTCTGTGCCAGCTCACCACGGCGGACAGGGGATGAAAAACTGTTTTTTGGCAGT	CASSPRRTGDEKLFF	14	0.000124156	TCRBV18-01*01	TCRBD01-01*01	TCRBJ01-04*01
ACTGTGAGCAACATGAGCCCTGAAGACAGCAGCATATATCTCTGCAGCGTTACGGACTCTGGGGCCAACGTCCTGACTTTCGGGGCC	CSVTDSGANVLTF	14	0.000124156	TCRBV29-01*01	unknown	TCRBJ02-06*01
CAGCCTGCAAAGCTTGAGGACTCGGCCGTGTATCTCTGTGCCAGCAGCTTAGATCGGAGGAGAATCTATGGCTACACCTTCGGTTCG	CASSLDRRRIYGYTF	14	0.000124156	TCRBV11-02*02	TCRBD02-01*02	TCRBJ01-02*01
CTACACACCCTGCAGCCAGAAGACTCGGCCCTGTATCTCTGCGCCAGCAGCCAAGATTTAGGGGACACTGAAGCTTTCTTTGGACAA	CASSQDLGDTEAFF	14	0.000124156	TCRBV04-03*01	TCRBD01-01*01	TCRBJ01-01*01
CAGCCTGCAGAGCTTGGGGACTCGGCCATGTATCTCTGTGCCAGCAGCTTGAGAACAGGGCTGACAGATACGCAGTATTTTGGCCCA	CASSLRTGLTDTQYF	14	0.000124156	TCRBV11-01*01	TCRBD01-01*01	TCRBJ02-03*01
ACTGTGAGCAACATGAGCCCTGAAGACAGCAGCATATATCTCTGCAGCGTCCCCGGGACAGGGAACTACGAGCAGTACTTCGGGCCG	CSVPGTGNYEQYF	14	0.000124156	TCRBV29-01*01	TCRBD01-01*01	TCRBJ02-07*01
ACTCTGAAGATCCGGTCCACAAAGCTGGAGGACTCAGCCATGTACTTCTGTGCCAGCAGCCCATCAGACGAGCAGTACTTCGGGCCG	CASSPSDEQYF	14	0.000124156	TCRBV02-01*01	TCRBD01-01*01	TCRBJ02-07*01
ATGAGCCCTGAAGACAGCAGCATATATCTCTGCAGCGTGGGCGCCGGGACAGGGTCCGGAGGGGGAGAGACCCAGTACTTCGGGCCA	CSVGAGTGSGGGETQYF	13	0.000115288	TCRBV29-01*01	TCRBD01-01*01	TCRBJ02-05*01
CAGGTAGTGCGAGGAGATTCGGCAGCTTATTTCTGTGCCAGCTCACCACGGAAGGGTAAAGCTGACTATGGCTACACCTTCGGTTCG	CASSPRKGKADYGYTF	13	0.000115288	TCRBV18-01*01	unknown	TCRBJ01-02*01
GTAGTGCGAGGAGATTCGGCAGCTTATTTCTGTGCCAGCTCACCATCTTCTTCGGGACAGGGTACCCACGAGCAGTACTTCGGGCCG	CASSPSSSGQGTHEQYF	13	0.000115288	TCRBV18-01*01	TCRBD01-01*01	TCRBJ02-07*01
GAGTCGGCTGCTCCCTCCCAGACATCTGTGTACTTCTGTGCCAGCAGTGGACTAGCGGGGGCCTACAATGAGCAGTTCTTCGGGCCA	CASSGLAGAYNEQFF	13	0.000115288	TCRBV06-01*01	TCRBD02-01*01	TCRBJ02-01*01
CAGCGCACACAGCAGGAGGACTCCGCCGTGTATCTCTGTGCCAGCAGCCAAGGGGCCACAGGGAGTAACGAGCAGTACTTCGGGCCG	CASSQGATGSNEQYF	13	0.000115288	TCRBV07-08*01	TCRBD01-01*01	TCRBJ02-07*01
AATGTGAGCACCTTGGAGCTGGGGGACTCGGCCCTTTATCTTTGCGCCAGCAGCTACGCGGGGTCCTACGAGCAGTACTTCGGGCCG	CASSYAGSYEQYF	13	0.000115288	TCRBV05-01*01	TCRBD02-01*01	TCRBJ02-07*01
GTGACCAGTGCCCATCCTGAAGACAGCAGCTTCTACATCTGCAGTGTAAAACAGGGGGTTAGCAATCAGCCCCAGCATTTTGGTGAT	CSVKQGVSNQPQHF	13	0.000115288	TCRBV20	TCRBD01-01*01	TCRBJ01-05*01
GACATCCGCTCACCAGGCCTGGGGGACGCAGCCATGTACCTGTGTGCCACCAGCAGAGAAGGCCACCAGCCCCAGCATTTTGGTGAT	CATSREGHQPQHF	13	0.000115288	TCRBV15-01*01	unknown	TCRBJ01-05*01
CAGCCTGCAAAGCTTGAGGACTCGGCCGTGTATCTCTGTGCCAGCAGCTTAGAATCAGGGTTTCGGGGGGAGCAGTACTTCGGGCCG	CASSLESGFRGEQYF	13	0.000115288	TCRBV11-02*02	TCRBD02-01*01	TCRBJ02-07*01
GAGTCAGGGGACACAGCACTGTATTTCTGTGCCAGCAGCAAAAAGCCCCGCGGAACCCGACGAAACTACGAGCAGTACTTCGGGCCG	CASSKKPRGTRRNYEQYF	13	0.000115288	TCRBV21-01*01	TCRBD02-01	TCRBJ02-07*01
AATGTGAATGCCTTGGAGCTGGAGGACTCGGCCCTGTATCTCTGTGCCAGCAGCCCTCGGTTCACCGGGGAGCTGTTTTTTGGAGAA	CASSPRFTGELFF	13	0.000115288	TCRBV05-08*01	TCRBD02-01	TCRBJ02-02*01
GCTCCCTCCCAAACATCTGTGTACTTCTGTGCCAGCAGGCCCCGATGGACAGGGGGCGAAATCAATCAGCCCCAGCATTTTGGTGAT	CASRPRWTGGEINQPQHF	13	0.000115288	TCRBV06	TCRBD01-01*01	TCRBJ01-05*01
GAGTCCGCTACCAGCTCCCAGACATCTGTGTACTTCTGTGCCATCAGTGAAAGGCAGGGGGCTGGGGAGACCCAGTACTTCGGGCCA	CAISERQGAGETQYF	13	0.000115288	TCRBV10-03*01	TCRBD01-01*01	TCRBJ02-05*01
TCGGCTGCTCCCTCCCAGACATCTGTGTACTTCTGTGCCAGCAGTTCCCGTCCAGGGGGCTCCTACAATGAGCAGTTCTTCGGGCCA	CASSSRPGGSYNEQFF	13	0.000115288	TCRBV06-05*01	TCRBD01-01*01	TCRBJ02-01*01
GTGACCAGTGCCCATCCTGAAGACAGCAGCTTCTACATCTGCAGTGCCCCGGACAGGTCTGCGGGAAACACCATATATTTTGGAGAG	CSAPDRSAGNTIYF	13	0.000115288	TCRBV20	TCRBD01-01*01	TCRBJ01-03*01
AACCTGAGCTCTCTGGAGCTGGGGGACTCAGCTTTGTATTTCTGTGCCAGCAGCGTCGCAGGGACCTATGGCTACACCTTCGGTTCG	CASSVAGTYGYTF	13	0.000115288	TCRBV09-01	unknown	TCRBJ01-02*01
CTGAAGATCCGGTCCACAAAGCTGGAGGACTCAGCCATGTACTTCTGTGCCAGCAGGCCCACTAGCGGGGGACCGTTCTTCGGGCCA	CASRPTSGGPFF	13	0.000115288	TCRBV02-01*01	TCRBD02-01*01	TCRBJ02-01*01
ACGATCCAGCGCACACAGCAGGAGGACTCGGCCGTGTATCTCTGTGCCAGCAGCTTAGGGACAGGGAATGAAGCTTTCTTTGGACAA	CASSLGTGNEAFF	13	0.000115288	TCRBV07-02*01	TCRBD01-01*01	TCRBJ01-01*01
CTCAGGCTGGAGTCGGCTGCTCCCTCCCAGACATCTGTGTACTTCTGTGCCGGGGCAACCCGGCCCGATACGCAGTATTTTGGCCCA	CAGATRPDTQYF	13	0.000115288	TCRBV06-01*01	TCRBD01-01*01	TCRBJ02-03*01
ACCAGTGCCCATCCTGAAGACAGCAGCTTCTACATCTGCAGTGCTGGACTAGCGGGGGGGCCGGGGAATGAGCAGTTCTTCGGGCCA	CSAGLAGGPGNEQFF	13	0.000115288	TCRBV20	TCRBD02-01*01	TCRBJ02-01*01
AAGATCCGGTCCACAAAGCTGGAGGACTCAGCCATGTACTTCTGTGCCAGCAGTGAATCCCACACCGGGGAGCTGTTTTTTGGAGAA	CASSESHTGELFF	13	0.000115288	TCRBV02-01*01	unknown	TCRBJ02-02*01
ACAGTGACCAGTGCCCATCCTGAAGACAGCAGCTTCTACATCTGCAGTGCTAGTCTGTTAGTCACAGATACGCAGTATTTTGGCCCA	CSASLLVTDTQYF	13	0.000115288	TCRBV20	TCRBD02-01	TCRBJ02-03*01
GCCCATCCTGAAGACAGCAGCTTCTACATCTGCAGTGCTAGAGTTAGATCCACACTATCCGAGAGCTACGAGCAGTACTTCGGGCCG	CSARVRSTLSESYEQYF	13	0.000115288	TCRBV20	TCRBD02-01	TCRBJ02-07*01
GTGAGCACCTTGGAGCTGGGGGACTCGGCCCTTTATCTTTGCGCCAGCAGTGGGACAGTTGAGAACACTGAAGCTTTCTTTGGACAA	CASSGTVENTEAFF	13	0.000115288	TCRBV05-01*01	TCRBD01-01*01	TCRBJ01-01*01
ACCTTGGAGCTGGGGGACTCGGCCCTTTATCTTTGCGCCAGCAGCTTGGCCCGGGGGACAGGGAACACTGAAGCTTTCTTTGGACAA	CASSLARGTGNTEAFF	13	0.000115288	TCRBV05-01*01	TCRBD01-01*01	TCRBJ01-01*01
ACCAGTGCCCATCCTGAAGACAGCAGCTTCTACATCTGCAGTGCTCCGGGACAGGGTACAATGAACACTGAAGCTTTCTTTGGACAA	CSAPGQGTMNTEAFF	13	0.000115288	TCRBV20	TCRBD01-01*01	TCRBJ01-01*01
ACTCTGAAGATCCAGCCCTCAGAACCCAGGGACTCAGCTGTGTACTTCTGTGCCAGCAGTGGGGACCGCGAGCAGTACTTCGGGCCG	CASSGDREQYF	13	0.000115288	TCRBV12	unknown	TCRBJ02-07*01
CTGGAGTCGGCTGCTCCCTCCCAGACATCTGTGTACTTCTGTGCCAGCAGTGGGGACAGTGGCAATTCACCCCTCCACTTTGGGAAC	CASSGDSGNSPLHF	13	0.000115288	TCRBV06-01*01	TCRBD01-01*01	TCRBJ01-06*01
CGCACACAGCAGGAGGACTCGGCCGTGTATCTCTGTGCCAGCAACCCGGCTAGCGGGGGGGCGGGCGGGGAGCTGTTTTTTGGAGAA	CASNPASGGAGGELFF	13	0.000115288	TCRBV07-02*01	TCRBD02-01*01	TCRBJ02-02*01
CTGGGGGACGCAGCCATGTACCTGTGTGCCACCAGCAGAGATCCCACAGGGCCCACCTCTGGGGCCAACGTCCTGACTTTCGGGGCC	CATSRDPTGPTSGANVLTF	13	0.000115288	TCRBV15-01*01	TCRBD01-01*01	TCRBJ02-06*01
TCCACAAAGCTGGAGGACTCAGCCATGTACTTCTGTGCCAGCAGACAACAGGGGGCCGGCATCAATCAGCCCCAGCATTTTGGTGAT	CASRQQGAGINQPQHF	13	0.000115288	TCRBV02-01*01	TCRBD01-01*01	TCRBJ01-05*01
ACGTTGGCGTCTGCTGTACCCTCTCAGACATCTGTGTACTTCTGTGCCAGCAGTGAGTATAGCAATCAGCCCCAGCATTTTGGTGAT	CASSEYSNQPQHF	13	0.000115288	TCRBV06-04	TCRBD02-01	TCRBJ01-05*01
TTCACTCTGAAGATCCGGTCCACAAAGCTGGAGGACTCAGCCATGTACTTCTGTGCCAGCAGTGGGGGTGAGCAGTTCTTCGGGCCA	CASSGGEQFF	13	0.000115288	TCRBV02-01*01	unknown	TCRBJ02-01*01
CAGCGCACAGAGCGGGGGGACTCAGCCGTGTATCTCTGTGCCAGCAGCTTATCCGCCAGGGGGAACACTGAAGCTTTCTTTGGACAA	CASSLSARGNTEAFF	13	0.000115288	TCRBV07-03*01	TCRBD01-01*01	TCRBJ01-01*01
GTGAGCAACATGAGCCCTGAAGACAGCAGCATATATCTCTGCAGCGTTGCCCAGCGAGGCCCTAACAATGAGCAGTTCTTCGGGCCA	CSVAQRGPNNEQFF	13	0.000115288	TCRBV29-01*01	TCRBD02-01	TCRBJ02-01*01
CTGGAGTCGCCCAGCCCCAACCAGACCTCTCTGTACTTCTGTGCCAGCAGCCTCGGGGGGTCATACAATGAGCAGTTCTTCGGGCCA	CASSLGGSYNEQFF	13	0.000115288	TCRBV27-01*01	TCRBD02-01*01	TCRBJ02-01*01
ACGATCCAGCGCACACAGCAGGAGGACTCGGCCGTGTATCTCTGTGCCAGCAGCCCAGGCCCGACCCCACCCCTCCACTTTGGGAAC	CASSPGPTPPLHF	13	0.000115288	TCRBV07-02*01	TCRBD01-01*01	TCRBJ01-06*01
ATCCAGCAGGTAGTGCGAGGAGATTCGGCAGCTTATTTCTGTGCCAGCTCACCTAGACGGGGGGGTGAGACCCAGTACTTCGGGCCA	CASSPRRGGETQYF	13	0.000115288	TCRBV18-01*01	TCRBD02-01*01	TCRBJ02-05*01
CTCACTCTGGAGTCCGCTACCAGCTCCCAGACATCTGTGTACTTCTGTGCCATCAGTGAGAAGGGTAACGAGCAGTACTTCGGGCCG	CAISEKGNEQYF	13	0.000115288	TCRBV10-03*01	unknown	TCRBJ02-07*01
ACAGTGACCAGTGCCCATCCTGAAGACAGCAGCTTCTACATCTGCAGTGCTAGAGAGGGAAGCACCGGGGAGCTGTTTTTTGGAGAA	CSAREGSTGELFF	13	0.000115288	TCRBV20	unknown	TCRBJ02-02*01
TCGGCTGCTCCCTCCCAGACATCTGTGTACTTCTGTGCCAGCAGGGATACAGGGTCGAATTGGAATTCACCCCTCCACTTTGGGAAC	CASRDTGSNWNSPLHF	13	0.000115288	TCRBV06	TCRBD01-01*01	TCRBJ01-06*01
AGGCTGCTGTCGGCTGCTCCCTCCCAGACATCTGTGTACTTCTGTGCCAGCAGTTACTACGGGGGAGAGACCCAGTACTTCGGGCCA	CASSYYGGETQYF	13	0.000115288	TCRBV06-05*01	TCRBD02-01*01	TCRBJ02-05*01
TTGGAGCTGGACGACTCGGCCCTGTATCTCTGTGCCAGCAGTCGGGGGGGTGGCCCAGGGGGATTCTACGAGCAGTACTTCGGGCCG	CASSRGGGPGGFYEQYF	13	0.000115288	TCRBV05-04*01	TCRBD02-01*01	TCRBJ02-07*01
CGCACAGAGCAGCGGGACTCAGCCATGTATCGCTGTGCCAGCAGCTTAAATCAGGGATTGGGCACCGGGGAGCTGTTTTTTGGAGAA	CASSLNQGLGTGELFF	13	0.000115288	TCRBV07-07*01	TCRBD01-01*01	TCRBJ02-02*01
AGGCTGGAGTTGGCTGCTCCCTCCCAGACATCTGTGTACTTCTGTGCCAGCATCAAAGGGAGTGGGGCTGAAGCTTTCTTTGGACAA	CASIKGSGAEAFF	13	0.000115288	TCRBV06-06	TCRBD02-01*02	TCRBJ01-01*01
GTGACCAGTGCCCATCCTGAAGACAGCAGCTTCTACATCTGCAGTGCCACGCGGGGTTCGACTAACTATGGCTACACCTTCGGTTCG	CSATRGSTNYGYTF	12	0.00010642	TCRBV20	TCRBD02-01*01	TCRBJ01-02*01
TCCCTGTCCCTAGAGTCTGCCATCCCCAACCAGACAGCTCTTTACTTCTGTGCCACCAGTGATTTTGAGACCCAGTACTTCGGGCCA	CATSDFETQYF	12	0.00010642	TCRBV24	unknown	TCRBJ02-05*01
ATCCGGTCCACAAAGCTGGAGGACTCAGCCATGTACTTCTGTGCCAGCAAAGGGACAGTAACTTCCTACGAGCAGTACTTCGGGCCG	CASKGTVTSYEQYF	12	0.00010642	TCRBV02-01*01	TCRBD01-01*01	TCRBJ02-07*01
CTGGAGCTGGGGGACTCAGCTTTGTATTTCTGTGCCAGCAGCCCACGATCTCGGGGGGGGGCCGGAGATACGCAGTATTTTGGCCCA	CASSPRSRGGAGDTQYF	12	0.00010642	TCRBV09-01	TCRBD02-01*01	TCRBJ02-03*01
GAGTCGGCTGCTCCCTCCCAGACATCTGTGTACTTCTGTGCCAGCAGTGTTGGCGGGGGGAACACCGGGGAGCTGTTTTTTGGAGAA	CASSVGGGNTGELFF	12	0.00010642	TCRBV06-01*01	TCRBD02-01*01	TCRBJ02-02*01
CCTGAAGACAGCAGCTTCTACATCTGCAGTGCTAGTCAGCCCCCCAGAGAGGGACTAGCGGGGGGGAGGGAGCAGTACTTCGGGCCG	CSASQPPREGLAGGREQYF	12	0.00010642	TCRBV20	TCRBD02-01*01	TCRBJ02-07*01
ATCAATTCCCTGGAGCTTGGTGACTCTGCTGTGTATTTCTGTGCCAGCAGCAGAGGGGACCGAGCCTACGAGCAGTACTTCGGGCCG	CASSRGDRAYEQYF	12	0.00010642	TCRBV03	unknown	TCRBJ02-07*01
ATCCAGCCTGCAAAGCTTGAGGACTCGGCCGTGTATCTCTGTGCCAGCAGCTTAAATGAGGTTAACTATGGCTACACCTTCGGTTCG	CASSLNEVNYGYTF	12	0.00010642	TCRBV11-02*02	TCRBD02-01*02	TCRBJ01-02*01
ATCCAGCCTGCAGAGCTTGGGGACTCGGCCGTGTATCTCTGTGCCAGCAGCCACCCGCCTACCTCCTACGAGCAGTACTTCGGGCCG	CASSHPPTSYEQYF	12	0.00010642	TCRBV11-03*01	TCRBD02-01	TCRBJ02-07*01
GAGTCGGCTGCTCCCTCCCAAACATCTGTGTACTTCTGTGCCAGCAGTCCCGATCCGACTAGCACAGATACGCAGTATTTTGGCCCA	CASSPDPTSTDTQYF	12	0.00010642	TCRBV06	TCRBD02-01	TCRBJ02-03*01
ATCCTGGAGTCGCCCAGCCCCAACCAGACCTCTCTGTACTTCTGTGCCAGCTGGAATTCTATGAACACTGAAGCTTTCTTTGGACAA	CASWNSMNTEAFF	12	0.00010642	TCRBV27-01*01	unknown	TCRBJ01-01*01
CAGCGCACACAGCAGGAGGACTCGGCCGTGTATCTCTGTGCCAGCAGCTCCGGGACGGGGGGAAGGGGGGAGCTGTTTTTTGGAGAA	CASSSGTGGRGELFF	12	0.00010642	TCRBV07-02*01	TCRBD02-01*01	TCRBJ02-02*01
GCCCAAAAGAACCCGACAGCTTTCTATCTCTGTGCCAGCAAAGAGGAGCCGCGGGGGGGGAAAAGAAGGGAGCTGTTTTTTGGAGAA	CASKEEPRGGKRRELFF	12	0.00010642	TCRBV19-01	TCRBD02-01*01	TCRBJ02-02*01
CAGCAGGAGGACTCCGCCGTGTATCTCTGTGCCAGCAGCCCCCGTGAGGGGTTTTTTTCCACTAATGAAAAACTGTTTTTTGGCAGT	CASSPREGFFSTNEKLFF	12	0.00010642	TCRBV07-08*01	unknown	TCRBJ01-04*01
CAGCCCTCAGAACCCAGGGACTCAGCTGTGTATTTTTGTGCTAGTGGTTTTTGGCGGACGGCGAACACTGAAGCTTTCTTTGGACAA	CASGFWRTANTEAFF	12	0.00010642	TCRBV12-05*01	unknown	TCRBJ01-01*01
TCCACAAAGCTGGAGGACTCAGCCATGTACTTCTGTGCCAGCAGTGATGGAACAGGTCGCTCTGGAAACACCATATATTTTGGAGAG	CASSDGTGRSGNTIYF	12	0.00010642	TCRBV02-01*01	TCRBD01-01*01	TCRBJ01-03*01
GACTCGGCCATGTATCTCTGTGCCAGCAGCGTAGGCAGGGACAGGGGGCGCAGAGGGAGCATAGTCTATGGCTACACCTTCGGTTCG	CASSVGRDRGRRGSIVYGYTF	12	0.00010642	unknown	TCRBD01-01*01	TCRBJ01-02*01
GGTGACTCTGCTGTGTATTTCTGTGCCAGCAGCTCCTCCTATCCAGGACAGGGAGGACTGTCCGGAAACACCATATATTTTGGAGAG	CASSSSYPGQGGLSGNTIYF	12	0.00010642	TCRBV03	TCRBD01-01*01	TCRBJ01-03*01
GCTGCTCCCTCCCAGACATCTGTGTACTTCTGTGCCAGCAGTTACGGAACTGACCGAAGTCGTGATCCCGAGCAGTACTTCGGGCCG	CASSYGTDRSRDPEQYF	12	0.00010642	TCRBV06	unknown	TCRBJ02-07*01
CTGGAGCTTGGTGACTCTGCTGTGTATTTCTGTGCCAGCAGCAACTACGAAGGACTAGCGTCCCCAGATACGCAGTATTTTGGCCCA	CASSNYEGLASPDTQYF	12	0.00010642	TCRBV03	TCRBD02-01	TCRBJ02-03*01
GAGTCAGGGGACACAGCACTGTATTTCTGTGCCAGCAGCAAAGGCGGGGGTCCCTCGCCACGGAGGGGGGAGCTGTTTTTTGGAGAA	CASSKGGGPSPRRGELFF	12	0.00010642	TCRBV21-01*01	TCRBD02-01*01	TCRBJ02-02*01
CTGAGCTCTCTGGAGCTGGGGGACTCAGCTTTGTATTTCTGTGCCAGCAGCGTAGACTTAGTAGGGGAGACCCAGTACTTCGGGCCA	CASSVDLVGETQYF	12	0.00010642	TCRBV09-01	unknown	TCRBJ02-05*01
ACGTTGGCGTCTGCTGTACCCTCTCAGACATCTGTGTACTTCTGTGCCAGCAGTGTAAACATCGAAGGTGAAGCTTTCTTTGGACAA	CASSVNIEGEAFF	12	0.00010642	TCRBV06-04	unknown	TCRBJ01-01*01
AAGATCCGGTCCACAAAGCTGGAGGACTCAGCCATGTACTTCTGTGCCAGCAATGACCGTAGCAATCAGCCCCAGCATTTTGGTGAT	CASNDRSNQPQHF	12	0.00010642	TCRBV02-01*01	TCRBD02-01	TCRBJ01-05*01
GAGATCCAGCGCACAGAGCAGGGGGACTCGGCCATGTATCTCTGTGCCAGCAGCTTACAGGGGGCGGGAGGCTACACCTTCGGTTCG	CASSLQGAGGYTF	12	0.00010642	TCRBV07-09	TCRBD01-01*01	TCRBJ01-02*01
ATCCAGCAGGTAGTGCGAGGAGATTCGGCAGCTTATTTCTGTGCCAGCTCACCTCAGAACTCTGGAAACACCATATATTTTGGAGAG	CASSPQNSGNTIYF	12	0.00010642	TCRBV18-01*01	TCRBD01-01*01	TCRBJ01-03*01
GTGACCAGTGCCCATCCTGAAGACAGCAGCTTCTACATCTGCAGTGCTAGAGATGTGAATAGCAATCAGCCCCAGCATTTTGGTGAT	CSARDVNSNQPQHF	12	0.00010642	TCRBV20	unknown	TCRBJ01-05*01
AGCTCTCTGGAGCTGGGGGACTCAGCTTTGTATTTCTGTGCCAGCAGCGTAGAGGAACAGGGGGCGCCCGGCTACACCTTCGGTTCG	CASSVEEQGAPGYTF	12	0.00010642	TCRBV09-01	TCRBD01-01*01	TCRBJ01-02*01
ACAGAGCAGGGGGACTCGGCCATGTATCTCTGTGCCAGCAGCTCCCGGGCCTCCTCGGTCTGGTCCTATGGCTACACCTTCGGTTCG	CASSSRASSVWSYGYTF	12	0.00010642	TCRBV07-09	unknown	TCRBJ01-02*01
CAGCGCACAGAGCAGGGGGACTCGGCCATGTATCTCTGTGCCAGCAGCTCAACCATGTCGCTAGCCTACGAGCAGTACTTCGGGCCG	CASSSTMSLAYEQYF	12	0.00010642	TCRBV07-09	TCRBD02-01	TCRBJ02-07*01
CAGCCTGCAGAGCTTGGGGACTCGGCCGTGTATCTCTGTGCCAGCAGCCGAACGACAGACTTCGGAGATACGCAGTATTTTGGCCCA	CASSRTTDFGDTQYF	12	0.00010642	TCRBV11-03*01	TCRBD01-01*01	TCRBJ02-03*01
GCGTCTGCTGTACCCTCTCAGACATCTGTGTACTTCTGTGCCAGCAGTGACTCGAGGAGTCATAATTCACCCCTCCACTTTGGGAAC	CASSDSRSHNSPLHF	12	0.00010642	TCRBV06-04	TCRBD02-01*02	TCRBJ01-06*01
TCTCTGGAGCTGGGGGACTCAGCTTTGTATTTCTGTGCCAGCAGCGCCATATTCGATTCGGGCACCGGGGAGCTGTTTTTTGGAGAA	CASSAIFDSGTGELFF	12	0.00010642	TCRBV09-01	TCRBD02-01	TCRBJ02-02*01
ATCCAGCCTGCAGAGCTTGGGGACTCGGCCATGTATCTCTGTGCCAGCAGCCCAGCAGGGAATCGCTACGAGCAGTACTTCGGGCCG	CASSPAGNRYEQYF	12	0.00010642	TCRBV11-01*01	TCRBD01-01*01	TCRBJ02-07*01
GAGTCAGCTACCCGCTCCCAGACATCTGTGTATTTCTGCGCCAGCAGTGAACTAGCGGGGGCTCGGGATACGCAGTATTTTGGCCCA	CASSELAGARDTQYF	12	0.00010642	TCRBV10-02*01	TCRBD02-01*01	TCRBJ02-03*01
CTGAAGATCCAGCCCTCAGAACCCAGGGACTCAGCTGTGTACTTCTGTGCCAGCAGTTTAAAGGGTCTTGCGCAGTTCTTCGGGCCA	CASSLKGLAQFF	12	0.00010642	TCRBV12	unknown	TCRBJ02-01*01
GCTGCTCCCTCCCAGACATCTGTGTACTTCTGTGCCAGCAGCACCGGGACTAGCGGGGGGGCAGGAGAGACCCAGTACTTCGGGCCA	CASSTGTSGGAGETQYF	12	0.00010642	TCRBV06	TCRBD02-01*01	TCRBJ02-05*01
ACAGTGACCAGTGCCCATCCTGAAGACAGCAGCTTCTACATCTGCAGTGCTATCGGACAGGGCGTCTATGGCTACACCTTCGGTTCG	CSAIGQGVYGYTF	12	0.00010642	TCRBV20	TCRBD01-01*01	TCRBJ01-02*01
GCTACCAGCTCCCAGACATCTGTGTACTTCTGTGCCATCAGTGAAGCGAGACTAGCGGGGCTCACAGATACGCAGTATTTTGGCCCA	CAISEARLAGLTDTQYF	12	0.00010642	TCRBV10-03*01	TCRBD02-01*01	TCRBJ02-03*01
GCGTCTGCTGTACCCTCTCAGACATCTGTGTACTTCTGTGCCAGCAGTGACTCAGCGGGGGGCACAGATACGCAGTATTTTGGCCCA	CASSDSAGGTDTQYF	12	0.00010642	TCRBV06-04	TCRBD02-01*01	TCRBJ02-03*01
GAGTCAGCTGCTCCCTCCCAGACATCTGTGTACTTCTGTGCCCGCACTAAACGGGACAGGGGGCTCAATGAGCAGTTCTTCGGGCCA	CARTKRDRGLNEQFF	12	0.00010642	TCRBV06	TCRBD01-01*01	TCRBJ02-01*01
CACCTACACGCCCTGCAGCCAGAAGACTCAGCCCTGTATCTCTGCGCCAGCAGCCAAGGAAATGAGAATGAAGCTTTCTTTGGACAA	CASSQGNENEAFF	12	0.00010642	TCRBV04-01*01	TCRBD02-01*02	TCRBJ01-01*01
GTGAGCACCTTGGAGCTGGGGGACTCGGCCCTTTATCTTTGCGCCAGCAGCTTGGCCACGTTTGGGACTGAAGCTTTCTTTGGACAA	CASSLATFGTEAFF	12	0.00010642	TCRBV05-01*01	unknown	TCRBJ01-01*01
ATCCAGCAGGTAGTGCGAGGAGATTCGGCAGCTTATTTCTGTGCCAGCTCACAAGGACAGGGGTCCCACGAGCAGTACTTCGGGCCG	CASSQGQGSHEQYF	12	0.00010642	TCRBV18-01*01	TCRBD01-01*01	TCRBJ02-07*01
CAGCCCTCAGAACCCAGGGACTCAGCTGTGTACTTCTGTGCCAGCACCGGGGGGGTGTCTACTCGGGAGACCCAGTACTTCGGGCCA	CASTGGVSTRETQYF	12	0.00010642	TCRBV12	TCRBD02-01*01	TCRBJ02-05*01
CTGTCGGCTGCTCCCTCCCAGACATCTGTGTACTTCTGTGCCAGCAGTGTACGCGGGGACAGGGGAGACACCATATATTTTGGAGAG	CASSVRGDRGDTIYF	12	0.00010642	TCRBV06-05*01	TCRBD01-01*01	TCRBJ01-03*01
CGGTCCACAAAGCTGGAGGACTCAGCCATGTACTTCTGTGCCAGCAGGGAAAGCGGGGGGGAGGTAGATACGCAGTATTTTGGCCCA	CASRESGGEVDTQYF	12	0.00010642	TCRBV02-01*01	TCRBD02-01*01	TCRBJ02-03*01
AATGTGAGCACCTTGGAGCTGGGGGACTCGGCCCTTTATCTTTGCGCCAGCAGCTTGGAGGGGGCCTACGAGCAGTACTTCGGGCCG	CASSLEGAYEQYF	12	0.00010642	TCRBV05-01*01	TCRBD01-01*01	TCRBJ02-07*01
GTGCAGCCTGCAGAACTGGAGGATTCTGGAGTTTATTTCTGTGCCAGCAGCCCGAGGTTAAGGAACGACGAGCAGTACTTCGGGCCG	CASSPRLRNDEQYF	12	0.00010642	TCRBV14-01*01	TCRBD02-01*02	TCRBJ02-07*01
ATCCAGCGCACACAGCAGGAGGACTCGGCCGTGTATCTCTGTGCCAGCAGCGTAGGACTAAGCACAGATACGCAGTATTTTGGCCCA	CASSVGLSTDTQYF	12	0.00010642	TCRBV07-02*01	TCRBD02-01	TCRBJ02-03*01
AAGATCCAGCCTGCAGAGCTTGGGGACTCGGCCGTGTATCTCTGTGCCAGCAGCCTCGGGGAAAACAATGAGCAGTTCTTCGGGCCA	CASSLGENNEQFF	12	0.00010642	TCRBV11-03*01	TCRBD02-01*01	TCRBJ02-01*01
ATCCAGCCTGCAGAGCTTGGGGACTCGGCCATGTATCTCTGTGCCAGCAGCCGGACAGGGAATAATTCACCCCTCCACTTTGGGAAC	CASSRTGNNSPLHF	12	0.00010642	TCRBV11-01*01	TCRBD01-01*01	TCRBJ01-06*01
ATCCAGCGCACAGAGCAGGGGGACTCGGCCATGTATCTCTGTGCCAGCAGCGCGGGACAGGGAAATGAAAAACTGTTTTTTGGCAGT	CASSAGQGNEKLFF	12	0.00010642	TCRBV07-09	TCRBD01-01*01	TCRBJ01-04*01
AACATGAGCTCCTTGGAGCTGGGGGACTCAGCCCTGTACTTCTGTGCCAGCAGCTCGGACAGCGGACCTGAAGCTTTCTTTGGACAA	CASSSDSGPEAFF	12	0.00010642	TCRBV13-01*01	TCRBD01-01*01	TCRBJ01-01*01
CTGCTGTCGGCTGCTCCCTCCCAGACATCTGTGTACTTCTGTGCCAGCAGCTATCGCTCTGACGGGACTGAAGCTTTCTTTGGACAA	CASSYRSDGTEAFF	12	0.00010642	TCRBV06-05*01	TCRBD02-01	TCRBJ01-01*01
ATCCAGCCTGCAGAGCTTGGGGACTCGGCCATGTATCTCTGTGCCAGCAGCCACAGGGGGAATAATTCACCCCTCCACTTTGGGAAC	CASSHRGNNSPLHF	12	0.00010642	TCRBV11-01*01	TCRBD01-01*01	TCRBJ01-06*01
CTTCACCTACACACCCTGCAGCCAGAAGACTCGGCCCTGTATCTCTGTGCCAGCAGCCAATGGGGGGAGACCCAGTACTTCGGGCCA	CASSQWGETQYF	12	0.00010642	TCRBV04-02*01	unknown	TCRBJ02-05*01
CTGACTGTGAGCAACATGAGCCCTGAAGACAGCAGCATATATCTCTGCAGCGTTAATAGGGGGGGCACTGAAGCTTTCTTTGGACAA	CSVNRGGTEAFF	12	0.00010642	TCRBV29-01*01	TCRBD02-01*01	TCRBJ01-01*01
CCGCTCAGGCTGCTGTCGGCTGCTCCCTCCCAGACATCTGTGTACTTCTGTGCCAGCAGTCCCGGGGCCGGCTACACCTTCGGTTCG	CASSPGAGYTF	12	0.00010642	TCRBV06-05*01	unknown	TCRBJ01-02*01
ATCCAGCCCTCAGAACCCAGGGACTCAGCTGTGTACTTCTGTGCCAGCAGTTTATTTCAGGGGACTCAGCCCCAGCATTTTGGTGAT	CASSLFQGTQPQHF	12	0.00010642	TCRBV12	TCRBD01-01*01	TCRBJ01-05*01
ACCTTGGAGCTGGGGGACTCGGCCCTTTATCTTTGCGCCAGCAGCTTGGGACCCGGCAATAGCAATCAGCCCCAGCATTTTGGTGAT	CASSLGPGNSNQPQHF	12	0.00010642	TCRBV05-01*01	unknown	TCRBJ01-05*01
AGGATCCAGCAGGTAGTGCGAGGAGATTCGGCAGCTTATTTCTGTGCCAGCTCACCGTCGGACAGTAGGGGCTACACCTTCGGTTCG	CASSPSDSRGYTF	12	0.00010642	TCRBV18-01*01	TCRBD01-01*01	TCRBJ01-02*01
ATCCAGCCCTCAGAACCCAGGGACTCAGCTGTGTACTTCTGTGCCAGCAGTTTGGGAGATGCGGGTCAGCCCCAGCATTTTGGTGAT	CASSLGDAGQPQHF	12	0.00010642	TCRBV12	TCRBD02-01	TCRBJ01-05*01
ACTCTGAAGATCCAGCCCTCAGAACCCAGGGACTCAGCTGTGTACTTCTGTGCCAGCAGTCGCGGCGAGCAGCAGTACTTCGGGCCG	CASSRGEQQYF	12	0.00010642	TCRBV12	TCRBD02-01	TCRBJ02-07*01
CTGTCGGCTGCTCCCTCCCAGACATCTGTGTACTTCTGTGCCAGCAGTTACTCGTGGTCTGGTTCCTACGAGCAGTACTTCGGGCCG	CASSYSWSGSYEQYF	12	0.00010642	TCRBV06-05*01	unknown	TCRBJ02-07*01
ATCCAGCGCACAGAGCAGGGGGACTCGGCCATGTATCTCTGTGCCAGCAGCCTACACGCAACTAATGAAAAACTGTTTTTTGGCAGT	CASSLHATNEKLFF	12	0.00010642	TCRBV07-09	unknown	TCRBJ01-04*01
GAGTCTGCCAGGCCCTCACATACCTCTCAGTACCTCTGTGCCAGCAGTGAGAAGACAGGGGGCCGCGATGGCTACACCTTCGGTTCG	CASSEKTGGRDGYTF	12	0.00010642	TCRBV25-01*01	TCRBD01-01*01	TCRBJ01-02*01
AAGATCCAGCCCTCAGAACCCAGGGACTCAGCTGTGTACTTCTGTGCCAGCGGGATGCAGGGGAGGTTTGGCTACACCTTCGGTTCG	CASGMQGRFGYTF	12	0.00010642	TCRBV12	unknown	TCRBJ01-02*01
AGCAACATGAGCCCTGAAGACAGCAGCATATATCTCTGCAGCGTTTTAACGGGGACAGGGAACACAGATACGCAGTATTTTGGCCCA	CSVLTGTGNTDTQYF	11	9.75515e-05	TCRBV29-01*01	TCRBD01-01*01	TCRBJ02-03*01
AACGCCTTGTTGCTGGGGGACTCGGCCCTCTATCTCTGTGCCAGCAGCCTCGGGACAGGGGGAAGTCAGCCCCAGCATTTTGGTGAT	CASSLGTGGSQPQHF	11	9.75515e-05	TCRBV05-06*01	TCRBD01-01*01	TCRBJ01-05*01
AAGATCCGGTCCACAAAGCTGGAGGACTCAGCCATGTACTTCTGTGCCAGCACCCCAGGGGCGAGCACTGAAGCTTTCTTTGGACAA	CASTPGASTEAFF	11	9.75515e-05	TCRBV02-01*01	TCRBD01-01*01	TCRBJ01-01*01
GACTCGGCCCTTTATCTTTGCGCCAGCAGCTTGCCCCCGCGAGGGCTAGCGGGGGGCAAGAACACCGGGGAGCTGTTTTTTGGAGAA	CASSLPPRGLAGGKNTGELFF	11	9.75515e-05	TCRBV05-01*01	TCRBD02-01*01	TCRBJ02-02*01
AGCACCTTGGAGCTGGGGGACTCGGCCCTTTATCTTTGCGCCAGCAGTAGGGACAGTGGGGGTAATGAAAAACTGTTTTTTGGCAGT	CASSRDSGGNEKLFF	11	9.75515e-05	TCRBV05-01*01	TCRBD01-01*01	TCRBJ01-04*01
CACACCCTGCAGCCAGAAGACTCGGCCCTGTATCTCTGCGCCAGCAGCCAATTCACAGGGGGCCGCAATGAGCAGTTCTTCGGGCCA	CASSQFTGGRNEQFF	11	9.75515e-05	TCRBV04-03*01	TCRBD01-01*01	TCRBJ02-01*01
ACTCTGGAGTCTGCTGCCTCCTCCCAGACATCTGTATATTTCTGCGCCAGCAGTACCGACAGGGGATCACCCCTCCACTTTGGGAAC	CASSTDRGSPLHF	11	9.75515e-05	TCRBV10-01	TCRBD01-01*01	TCRBJ01-06*01
AACGCCTTGTTGCTGGGGGACTCGGCCCTCTATCTCTGTGCCAGCAGCTCCCCCGGACAGGGTGGAGGGCCCCTCCACTTTGGGAAC	CASSSPGQGGGPLHF	11	9.75515e-05	TCRBV05-06*01	TCRBD01-01*01	TCRBJ01-06*01
AACGCCTTGGAGCTGGACGACTCGGCCCTGTATCTCTGTGCCAGCGAGGAAGGAGGGGGTAGCACAGATACGCAGTATTTTGGCCCA	CASEEGGGSTDTQYF	11	9.75515e-05	TCRBV05-04*01	unknown	TCRBJ02-03*01
CACATCAATTCCCTGGAGCTTGGTGACTCTGCTGTGTATTTCTGTGCCAGCAGCCCGCAGGCGAATCAGCCCCAGCATTTTGGTGAT	CASSPQANQPQHF	11	9.75515e-05	TCRBV03	TCRBD01-01*01	TCRBJ01-05*01
ATCCAGCAGGTAGTGCGAGGAGATTCGGCAGCTTATTTCTGTGCCAGCTCACCACAGGGACGGGAAAATGAGCAGTTCTTCGGGCCA	CASSPQGRENEQFF	11	9.75515e-05	TCRBV18-01*01	unknown	TCRBJ02-01*01
CAGCCTGCAAAGCTTGAGGACTCGGCCGTGTATCTCTGTGCCAGCAGCTTAGGATCCGGCCTCTACAATGAGCAGTTCTTCGGGCCA	CASSLGSGLYNEQFF	11	9.75515e-05	TCRBV11-02*02	unknown	TCRBJ02-01*01
CAGCGCACAGAGCAGGGGGACTCGGCCATGTATCTCTGTGCCAGCAGCCGAGGAGCGGGGGGGCCCGGAGAGCAGTACTTCGGGCCG	CASSRGAGGPGEQYF	11	9.75515e-05	TCRBV07-09	TCRBD02-01*01	TCRBJ02-07*01
ATCCAGCGCACAGAGCAGGGGGACTCGGCCATGTATCTCTGTGCCAGCAGCTTAAGCGCGGGGGCCAATGAGCAGTTCTTCGGGCCA	CASSLSAGANEQFF	11	9.75515e-05	TCRBV07-09	TCRBD02-01*01	TCRBJ02-01*01
CTGACGATCCAGCGCACACAGCAGGAGGACTCGGCCGTGTATCTCTGTGCCAGCAGCACCGGACGGCCTGAAGCTTTCTTTGGACAA	CASSTGRPEAFF	11	9.75515e-05	TCRBV07-02*01	unknown	TCRBJ01-01*01
CAGCGCACACAGCAGGAGGACTCGGCCGTGTATCTCTGTGCCAGCAGGTCAGCCACCGGGACAGGGTATCCCCTCCACTTTGGGAAC	CASRSATGTGYPLHF	11	9.75515e-05	TCRBV07-02*01	TCRBD01-01*01	TCRBJ01-06*01
CGCACACAGCAGGAGGACTCCGCCGTGTATCTCTGTGCCAGCAGCTTAGGGACAGGGGGGAGCAATCAGCCCCAGCATTTTGGTGAT	CASSLGTGGSNQPQHF	11	9.75515e-05	TCRBV07-08*01	TCRBD01-01*01	TCRBJ01-05*01
ATCCAGCCCTCAGAACCCAGGGACTCAGCTGTGTACTTCTGTGCCAGCAGCCGGGACAGTAGCAATCAGCCCCAGCATTTTGGTGAT	CASSRDSSNQPQHF	11	9.75515e-05	TCRBV12	TCRBD01-01*01	TCRBJ01-05*01
CTGGAGCTTGGTGACTCTGCTGTGTATTTCTGTGCCAGCACCCCAGATCGTCTGGGGCCGAGCACAGATACGCAGTATTTTGGCCCA	CASTPDRLGPSTDTQYF	11	9.75515e-05	TCRBV03	TCRBD01-01*01	TCRBJ02-03*01
CTGAGCTCTCTGGAGCTGGGGGACTCAGCTTTGTATTTCTGTGCCAGCAGCGATGGGGCGGCTGGAAACACCATATATTTTGGAGAG	CASSDGAAGNTIYF	11	9.75515e-05	TCRBV09-01	TCRBD01-01*01	TCRBJ01-03*01
ACCCTGCAGCCAGAAGACTCGGCCCTGTATCTCTGCGCCAGCAGCCAAGAGGGCACCATAAGGGGCACTGAAGCTTTCTTTGGACAA	CASSQEGTIRGTEAFF	11	9.75515e-05	TCRBV04-03*01	TCRBD01-01*01	TCRBJ01-01*01
CTGAGCTCTCTGGAGCTGGGGGACTCAGCTTTGTATTTCTGTGCCAGCAGCGGTACAGGGGTTATAAAGACCCAGTACTTCGGGCCA	CASSGTGVIKTQYF	11	9.75515e-05	TCRBV09-01	TCRBD01-01*01	TCRBJ02-05*01
ACCAGTGCCCATCCTGAAGACAGCAGCTTCTACATCTGCAGTGCTAGAGATCCCAGGGGCTCTGGAAACACCATATATTTTGGAGAG	CSARDPRGSGNTIYF	11	9.75515e-05	TCRBV20	TCRBD01-01*01	TCRBJ01-03*01
ATCCAGCGCACACAGCAGGAGGACTCGGCCGTGTATCTCTGTGCCAGCAGAGCGGCGGGGGGCTCCTACGAGCAGTACTTCGGGCCG	CASRAAGGSYEQYF	11	9.75515e-05	TCRBV07-02*01	TCRBD02-01*01	TCRBJ02-07*01
GTGACCAGTGCCCATCCTGAAGACAGCAGCTTCTACATCTGCAGTGCTAGAGATTCTAGCGGGGTTTGGACGCAGTATTTTGGCCCA	CSARDSSGVWTQYF	11	9.75515e-05	TCRBV20	TCRBD02-01*01	TCRBJ02-03*01
CAGCCCTCAGAACCCAGGGACTCAGCTGTGTACTTCTGTGCCAGCAGTTTCGACCCGAAGAACACCGGGGAGCTGTTTTTTGGAGAA	CASSFDPKNTGELFF	11	9.75515e-05	TCRBV12	unknown	TCRBJ02-02*01
AGCTCTCTGGAGCTGGGGGACTCAGCTTTGTATTTCTGTGCCAGCAGCGTAGGACAGGGGTGGATAAACACCATATATTTTGGAGAG	CASSVGQGWINTIYF	11	9.75515e-05	TCRBV09-01	TCRBD01-01*01	TCRBJ01-03*01
ACCTTGGAGCTGGGGGACTCGGCCCTTTATCTTTGCGCCAGCAGCTTGGAATCCGGGATCAACACCGGGGAGCTGTTTTTTGGAGAA	CASSLESGINTGELFF	11	9.75515e-05	TCRBV05-01*01	TCRBD02-01*02	TCRBJ02-02*01
AATGCCTTGGAGCTGGAGGACTCGGCCCTGTATCTCTGTGCCAGCAGCTTGGGACGCCGGTATAATTTACCCCTCCACTTTGGGAAC	CASSLGRRYNLPLHF	11	9.75515e-05	TCRBV05-08*01	unknown	TCRBJ01-06*01
AATGCCTTGGAGCTGGAGGACTCGGCCCTGTATCTCTGTGCCAGCAGCTCGGGACAGAAGATCAATCAGCCCCAGCATTTTGGTGAT	CASSSGQKINQPQHF	11	9.75515e-05	TCRBV05-08*01	TCRBD01-01*01	TCRBJ01-05*01
AATTCCCTGGAGCTTGGTGACTCTGCTGTGTATTTCTGTGCCAGCAGCCTCCGACAGGCCAAGGACTATGGCTACACCTTCGGTTCG	CASSLRQAKDYGYTF	11	9.75515e-05	TCRBV03	TCRBD01-01*01	TCRBJ01-02*01
CAGCGCACACAGCAGGAGGACTCGGCCGTGTATCTCTGTGCCAGCAGCTTAGCGACCGGACAACTCTATGGCTACACCTTCGGTTCG	CASSLATGQLYGYTF	11	9.75515e-05	TCRBV07-02*01	TCRBD01-01*01	TCRBJ01-02*01
ATCAATTCCCTGGAGCTTGGTGACTCTGCTGTGTATTTCTGTGCCAGCACCCCTTGGCAGGGCAACTATGGCTACACCTTCGGTTCG	CASTPWQGNYGYTF	11	9.75515e-05	TCRBV03	TCRBD01-01*01	TCRBJ01-02*01
ATCCAGCAGGTAGTGCGAGGAGATTCGGCAGCTTATTTCTGTGCCAGCTCACCCCGGGACAGTCGCTATGGCTACACCTTCGGTTCG	CASSPRDSRYGYTF	11	9.75515e-05	TCRBV18-01*01	TCRBD01-01*01	TCRBJ01-02*01
ACTCTCAAGATCCAGCCTGCAGAGCTTGGGGACTCGGCCGTGTATCTCTGTGCCAGCAGATCCCTTTACGAGCAGTACTTCGGGCCG	CASRSLYEQYF	11	9.75515e-05	TCRBV11-03*01	TCRBD02-01	TCRBJ02-07*01
ATCCAGCAGGTAGTGCGAGGAGATTCGGCAGCTTATTTCTGTGCCAGCTCACGACGTGGGGGGCTTACTGAAGCTTTCTTTGGACAA	CASSRRGGLTEAFF	11	9.75515e-05	TCRBV18-01*01	unknown	TCRBJ01-01*01
AGCACCTTGGAGCTGGGGGACTCGGCCCTTTATCTTTGCGCCAGCAGCTTTCAGGGGAATGAGAACAATGAGCAGTTCTTCGGGCCA	CASSFQGNENNEQFF	11	9.75515e-05	TCRBV05-01*01	TCRBD01-01*01	TCRBJ02-01*01
CAGCCTGCAGAGCTTGGGGACTCGGCCATGTATCTCTGTGCCAGCAGCTTAGCGCTTAGGCCCGGCACTGAAGCTTTCTTTGGACAA	CASSLALRPGTEAFF	11	9.75515e-05	TCRBV11-01*01	unknown	TCRBJ01-01*01
TCGGCTGCTCCCTCCCAGACATCTGTGTACTTCTGTGCCAGCACACTTAGTCATGCGACGAACACCGGGGAGCTGTTTTTTGGAGAA	CASTLSHATNTGELFF	11	9.75515e-05	TCRBV06	TCRBD02-01	TCRBJ02-02*01
CTCACGTTGGCGTCTGCTGTACCCTCTCAGACATCTGTGTACTTCTGTGCCAGCAGTGAAGGGACAGATACGCAGTATTTTGGCCCA	CASSEGTDTQYF	11	9.75515e-05	TCRBV06-04	unknown	TCRBJ02-03*01
AGTGCCCATCCTGAAGACAGCAGCTTCTACATCTGCAGTGCTAGAGATCCCGACAGGGGAGACTCCTCACCCCTCCACTTTGGGAAC	CSARDPDRGDSSPLHF	11	9.75515e-05	TCRBV20	TCRBD01-01*01	TCRBJ01-06*01
CTCACTGTGACATCGGCCCAAAAGAACCCGACAGCTTTCTATCTCTGTGCCAGTAGCGGGGACAAAGGGAGGCAGTATTTTGGCCCA	CASSGDKGRQYF	11	9.75515e-05	TCRBV19-01	TCRBD01-01*01	TCRBJ02-03*01
GAGTCTGCTGCCTCCTCCCAGACATCTGTATATTTCTGCGCCAGCAGTGTGGGGACAGGGGACACAGATACGCAGTATTTTGGCCCA	CASSVGTGDTDTQYF	11	9.75515e-05	TCRBV10-01	TCRBD01-01*01	TCRBJ02-03*01
GTGACCAGTGCCCATCCTGAAGACAGCAGCTTCTACATCTGCAGTGCTAAAGGGGACAGGGCAAGATATGAAGCTTTCTTTGGACAA	CSAKGDRARYEAFF	11	9.75515e-05	TCRBV20	TCRBD01-01*01	TCRBJ01-01*01
AATGTGAGCACCTTGGAGCTGGGGGACTCGGCCCTTTATCTTTGCGCCAGCAGCTTGGACCCTAACTATGGCTACACCTTCGGTTCG	CASSLDPNYGYTF	11	9.75515e-05	TCRBV05-01*01	unknown	TCRBJ01-02*01
CACGCCCTGCAGCCAGAAGACTCAGCCCTGTATCTCTGCGCCAGCAGCCAGGTGGACACTAACACCGGGGAGCTGTTTTTTGGAGAA	CASSQVDTNTGELFF	11	9.75515e-05	TCRBV04-01*01	TCRBD01-01*01	TCRBJ02-02*01
ACCCTGCAGCCAGAAGACTCGGCCCTGTATCTCTGTGCCAGCAGCCAAGATCTTGGGGGACAGGGCCAGCCCCAGCATTTTGGTGAT	CASSQDLGGQGQPQHF	11	9.75515e-05	TCRBV04-02*01	TCRBD01-01*01	TCRBJ01-05*01
CGGTCCACAAAGCTGGAGGACTCAGCCATGTACTTCTGTGCCAGCAGTGGGACAGGGAGGGTCCATCAGCCCCAGCATTTTGGTGAT	CASSGTGRVHQPQHF	11	9.75515e-05	TCRBV02-01*01	TCRBD01-01*01	TCRBJ01-05*01
AGGCTGGAGTTGGCTGCTCCCTCCCAGACATCTGTGTACTTCTGTGCCACCCAAGGCGTATTTGGAAACACCATATATTTTGGAGAG	CATQGVFGNTIYF	11	9.75515e-05	TCRBV06-06	unknown	TCRBJ01-03*01
CTGGAGTCGGCTGCTCCCTCCCAGACATCTGTGTACTTCTGTGCCAGCACCGGACTAGCGGGGGCCTACGAGCAGTACTTCGGGCCG	CASTGLAGAYEQYF	11	9.75515e-05	TCRBV06-01*01	TCRBD02-01*01	TCRBJ02-07*01
ACGATCCAGCGCACACAGCAGGAGGACTCGGCCGTGTATCTCTGTGCCAGCAGCACAGGGTCCTCAGATACGCAGTATTTTGGCCCA	CASSTGSSDTQYF	11	9.75515e-05	TCRBV07-02*01	TCRBD01-01*01	TCRBJ02-03*01
CAGGTAGTGCGAGGAGATTCGGCAGCTTATTTCTGTGCCAGCTCACCAATCCCCCAGGGAGGGACGCACGAGCAGTACTTCGGGCCG	CASSPIPQGGTHEQYF	11	9.75515e-05	TCRBV18-01*01	TCRBD02-01*02	TCRBJ02-07*01
GAGATCCAGCGCACAGAGCAGGGGGACTCGGCCATGTATCTCTGTGCCAGCAGCTTACAGGGACCCACTGAAGCTTTCTTTGGACAA	CASSLQGPTEAFF	11	9.75515e-05	TCRBV07-09	unknown	TCRBJ01-01*01
AGCTCTCTGGAGCTGGGGGACTCAGCTTTGTATTTCTGTGCCAGCAGCGTAGGAAGCACAGGGGGCGGGGAGCAGTACTTCGGGCCG	CASSVGSTGGGEQYF	11	9.75515e-05	TCRBV09-01	TCRBD01-01*01	TCRBJ02-07*01
GCAAAGCTTGAGGACTCGGCCGTGTATCTCTGTGCCAGCAGCTTAGAAACGGGCAGGGGGCTTCAAGATACGCAGTATTTTGGCCCA	CASSLETGRGLQDTQYF	11	9.75515e-05	TCRBV11-02*02	TCRBD01-01*01	TCRBJ02-03*01
CTGCTGTCGGCTGCTCCCTCCCAGACATCTGTGTACTTCTGTGCCAGCAGAAGCCGGGACACAAAAGAGACCCAGTACTTCGGGCCA	CASRSRDTKETQYF	11	9.75515e-05	TCRBV06-05*01	TCRBD01-01*01	TCRBJ02-05*01
AGCACCTTGGAGCTGGGGGACTCGGCCCTTTATCTTTGCGCCAGCAGCGTTTCAGGGTACTCCCAAGAGACCCAGTACTTCGGGCCA	CASSVSGYSQETQYF	11	9.75515e-05	TCRBV05-01*01	TCRBD01-01*01	TCRBJ02-05*01
GAAGACTCGGCCCTGTATCTCTGTGCCAGCAGCCAAGACACGGGACTAGCGGGGGGATCGTCTTCCTACGAGCAGTACTTCGGGCCG	CASSQDTGLAGGSSSYEQYF	11	9.75515e-05	TCRBV04-02*01	TCRBD02-01*01	TCRBJ02-07*01
GTGAACGCCTTGGAGCTGGACGACTCGGCCCTGTATCTCTGTGCCAGCAGCCAAGACCCGCTGCAAGAGACCCAGTACTTCGGGCCA	CASSQDPLQETQYF	11	9.75515e-05	TCRBV05-04*01	unknown	TCRBJ02-05*01
AGCACCTTGGAGCTGGGGGACTCGGCCCTTTATCTTTGCGCCAGCAGCTTGGTGGCGGGGGCGATGGGGGAGCAGTACTTCGGGCCG	CASSLVAGAMGEQYF	11	9.75515e-05	TCRBV05-01*01	TCRBD02-01*01	TCRBJ02-07*01
GTAGTGCGAGGAGATTCGGCAGCTTATTTCTGTGCCAGCTCACCCCCCGGCAGCGGGGGGTCCACAGATACGCAGTATTTTGGCCCA	CASSPPGSGGSTDTQYF	11	9.75515e-05	TCRBV18-01*01	TCRBD02-01*01	TCRBJ02-03*01
ACTGTGACATCGGCCCAAAAGAACCCGACAGCTTTCTATCTCTGTGCCAGCCTAGACAGAGTGAACACTGAAGCTTTCTTTGGACAA	CASLDRVNTEAFF	11	9.75515e-05	TCRBV19-01	TCRBD01-01*01	TCRBJ01-01*01
ATCCAGCCCTCAGAACCCAGGGACTCAGCTGTGTACTTCTGTGCCAGCAGCGCCCAGGAAGAGGGAACTGAGCAGTTCTTCGGGCCA	CASSAQEEGTEQFF	11	9.75515e-05	TCRBV12	TCRBD02-01*02	TCRBJ02-01*01
ATCCAGCGCACAGAGCAGGGGGACTCGGCCATGTATCTCTGTGCCAGCAGCCCTGGTGTAGGAATAGATACGCAGTATTTTGGCCCA	CASSPGVGIDTQYF	11	9.75515e-05	TCRBV07-09	unknown	TCRBJ02-03*01
CCGCTCAGGCTGGAGTTGGCTGCTCCCTCCCAGACATCTGTGTACTTCTGTGCCAGCAGCTTGGCCCAGAAAGCTTTCTTTGGACAA	CASSLAQKAFF	11	9.75515e-05	TCRBV06-06	TCRBD01-01*01	TCRBJ01-01*01
ACCAGTGCCCATCCTGAAGACAGCAGCTTCTACATCTGCAGTGCTAGAGATTATACTAGCGGCTACAATGAGCAGTTCTTCGGGCCA	CSARDYTSGYNEQFF	11	9.75515e-05	TCRBV20	TCRBD02-01	TCRBJ02-01*01
CAGCAGGTAGTGCGAGGAGATTCGGCAGCTTATTTCTGTGCCAGCTCACCACCCTCTAGAGGGGGGGAGACCCAGTACTTCGGGCCA	CASSPPSRGGETQYF	11	9.75515e-05	TCRBV18-01*01	unknown	TCRBJ02-05*01
TCCGCTACCAGCTCCCAGACATCTGTGTACTTCTGTGCCATCAGCGAAGGAGGGTGGGGGGGCGGCTACGAGCAGTACTTCGGGCCG	CAISEGGWGGGYEQYF	11	9.75515e-05	TCRBV10-03*01	TCRBD02-01*01	TCRBJ02-07*01
GCCTTGTTGCTGGGGGACTCGGCCCTGTATCTCTGTGCCAGCAGCTTTAGCTACGGCAGGGCCTCCTACGAGCAGTACTTCGGGCCG	CASSFSYGRASYEQYF	11	9.75515e-05	TCRBV05-05*01	TCRBD01-01*01	TCRBJ02-07*01
GTGACCAGTGCCCATCCTGAAGACAGCAGCTTCTACATCTGCAGTGCTAGGGGGGACAGGGACCTTTACGAGCAGTACTTCGGGCCG	CSARGDRDLYEQYF	11	9.75515e-05	TCRBV20	TCRBD01-01*01	TCRBJ02-07*01
ACGATCCAGCGCACAGAGCAGCGGGACTCGGCCATGTATCGCTGTGCCAGCAGCTTAGACTGGGGGGAGACCCAGTACTTCGGGCCA	CASSLDWGETQYF	11	9.75515e-05	TCRBV07-06*01	unknown	TCRBJ02-05*01
ATCCAGCGCACAGAGCAGGGGGACTCGGCCATGTATCTCTGTGCCAGCAGCAGGGACAGGGTCGGCACTGAAGCTTTCTTTGGACAA	CASSRDRVGTEAFF	11	9.75515e-05	TCRBV07-09	TCRBD01-01*01	TCRBJ01-01*01
CTGTCGGCTGCTCCCTCCCAGACATCTGTGTACTTCTGTGCCAGCAGTTACGGGGCGGGACTCTCCTACGAGCAGTACTTCGGGCCG	CASSYGAGLSYEQYF	11	9.75515e-05	TCRBV06-05*01	TCRBD02-01	TCRBJ02-07*01
CGCACACAGCAGGAGGACTCGGCCGTGTATCTCTGTGCCAGCAGCTCCTGGACAGGACCTACACAATATACGCAGTATTTTGGCCCA	CASSSWTGPTQYTQYF	11	9.75515e-05	TCRBV07-02*01	TCRBD01-01*01	TCRBJ02-03*01
TCGGCTGCTCCCTCCCAGACATCTGTGTACTTCTGTGCCAGCAGTGAAGCAGGACAGGCGGGTTCCTACGAGCAGTACTTCGGGCCG	CASSEAGQAGSYEQYF	11	9.75515e-05	TCRBV06-01*01	TCRBD01-01*01	TCRBJ02-07*01
TCTCTGGAGCTGGGGGACTCAGCTTTGTATTTCTGTGCCAGCAGCGCAGACCCCCTACCTAAAGGCTATGGCTACACCTTCGGTTCG	CASSADPLPKGYGYTF	11	9.75515e-05	TCRBV09-01	unknown	TCRBJ01-02*01
GAGTCGGCTGCTCCCTCCCAGACATCTGTGTACTTCTGTGCCAGCAGGACAGGGGGCTCTGGGGCCAACGTCCTGACTTTCGGGGCC	CASRTGGSGANVLTF	11	9.75515e-05	TCRBV06-01*01	TCRBD01-01*01	TCRBJ02-06*01
ACCTTGGAGCTGGGGGACTCGGCCCTTTATCTTTGCGCCAGCAGGCCCGGGACAGGAAGCATGAACACTGAAGCTTTCTTTGGACAA	CASRPGTGSMNTEAFF	11	9.75515e-05	TCRBV05-01*01	TCRBD01-01*01	TCRBJ01-01*01
CTGGAGTCGCCCAGCCCCAACCAGACCTCTCTGTACTTCTGTGCCAGCAGTTTAAGGCCAGCCCGGACTGAAGCTTTCTTTGGACAA	CASSLRPARTEAFF	11	9.75515e-05	TCRBV27-01*01	unknown	TCRBJ01-01*01
ATCCAGCCTGCAAAGCTTGAGGACTCGGCCGTGTATCTCTGTGCCAGCAGCCGGTGGGACACAGACTATGGCTACACCTTCGGTTCG	CASSRWDTDYGYTF	11	9.75515e-05	TCRBV11-02*02	TCRBD01-01*01	TCRBJ01-02*01
ACCAGTGCCCATCCTGAAGACAGCAGCTTCTACATCTGCAGTGCTCGGACGGGGAAATTCAACACCGGGGAGCTGTTTTTTGGAGAA	CSARTGKFNTGELFF	11	9.75515e-05	TCRBV20	TCRBD02-01*01	TCRBJ02-02*01
TTGGAGCTGGGGGACTCGGCCCTTTATCTTTGCGCCAGCAGCTTTGGCACCGGGACAGGGATGGACAATGAGCAGTTCTTCGGGCCA	CASSFGTGTGMDNEQFF	11	9.75515e-05	TCRBV05-01*01	TCRBD01-01*01	TCRBJ02-01*01
AGTGCCCATCCTGAAGACAGCAGCTTCTACATCTGCAGTGCTAGAGGTGCTAGCGGGGGGCCAAGTTACGAGCAGTACTTCGGGCCG	CSARGASGGPSYEQYF	11	9.75515e-05	TCRBV20	TCRBD02-01*01	TCRBJ02-07*01
ACATCGGCCCAAAAGAACCCGACAGCTTTCTATCTCTGTGCCAGTAGTATTCGGGACGCAGCTAATGAAAAACTGTTTTTTGGCAGT	CASSIRDAANEKLFF	11	9.75515e-05	TCRBV19-01	unknown	TCRBJ01-04*01
GCAAAGCTTGAGGACTCGGCCGTGTATCTCTGTGCCAGCAGCCCACTTACCATTCGGCTGAGGGACAACGAGCAGTACTTCGGGCCG	CASSPLTIRLRDNEQYF	10	8.86831e-05	TCRBV11-02*02	TCRBD01-01*01	TCRBJ02-07*01
CACGCCCTGCAGCCAGAAGACTCAGCCCTGTATCTCTGCGCCAGCAGCCAAGAAGCCCAGGTGAACACTGAAGCTTTCTTTGGACAA	CASSQEAQVNTEAFF	10	8.86831e-05	TCRBV04-01*01	TCRBD01-01*01	TCRBJ01-01*01
CTGGAGTCCGCTACCAGCTCCCAGACATCTGTGTACTTCTGTGCCATCAGTGAGTCAGAGGGATCACGCGAGCAGTACTTCGGGCCG	CAISESEGSREQYF	10	8.86831e-05	TCRBV10-03*01	TCRBD02-01*02	TCRBJ02-07*01
CAGCGCACAGAGCGGGGGGACTCAGCCGTGTATCTCTGTGCCAGCAGCCCTGACAGGACTCACACAGATACGCAGTATTTTGGCCCA	CASSPDRTHTDTQYF	10	8.86831e-05	TCRBV07-03*01	TCRBD01-01*01	TCRBJ02-03*01
ATCCGCTCACCAGGCCTGGGGGACGCAGCCATGTACCTGTGTGCCACCAGCGGCGACACCTACACCGGGGAGCTGTTTTTTGGAGAA	CATSGDTYTGELFF	10	8.86831e-05	TCRBV15-01*01	TCRBD01-01*01	TCRBJ02-02*01
CTGATCCTGGAGTCGCCCAGCCCCAACCAGACCTCTCTGTACTTCTGTGCCAGCAGTGACAGTAATTCACCCCTCCACTTTGGGAAC	CASSDSNSPLHF	10	8.86831e-05	TCRBV27-01*01	TCRBD01-01*01	TCRBJ01-06*01
ATCCAGCGCACACAGCAGGAGGACTCGGCCGTGTATCTCTGTGCCAGCAGCTTGGTCAGCTCTTCTTACGAGCAGTACTTCGGGCCG	CASSLVSSSYEQYF	10	8.86831e-05	TCRBV07-02*01	unknown	TCRBJ02-07*01
CACGCCCTGCAGCCAGAAGACTCAGCCCTGTATCTCTGCGCCAGCAGCCAAGATGCGGTAGCCAAAAACATTCAGTACTTCGGCGCC	CASSQDAVAKNIQYF	10	8.86831e-05	TCRBV04-01*01	TCRBD02-01	TCRBJ02-04*01
CAGCAGGTAGTGCGAGGAGATTCGGCAGCTTATTTCTGTGCCAGCTCACCACCGGGACAAGCTGGAAACACCATATATTTTGGAGAG	CASSPPGQAGNTIYF	10	8.86831e-05	TCRBV18-01*01	TCRBD01-01*01	TCRBJ01-03*01
CTGTCGGCTGCTCCCTCCCAGACATCTGTGTACTTCTGTGCCAGCAGTTACGGGACAGGGGCCAACTATGGCTACACCTTCGGTTCG	CASSYGTGANYGYTF	10	8.86831e-05	TCRBV06-05*01	TCRBD01-01*01	TCRBJ01-02*01
ATGAATGTGAGCACCTTGGAGCTGGGGGACTCGGCCCTTTATCTTTGCGCCAGCAGCGGCCAGGGGAACGAGCAGTACTTCGGGCCG	CASSGQGNEQYF	10	8.86831e-05	TCRBV05-01*01	TCRBD01-01*01	TCRBJ02-07*01
CACATCAATTCCCTGGAGCTTGGTGACTCTGCTGTGTATTTCTGTGCCAGCAGCCACCGGACTGTTTTGGCCCAGTACTTCGGGCCA	CASSHRTVLAQYF	10	8.86831e-05	TCRBV03	TCRBD02-01	TCRBJ02-05*01
GCTGCTCCCTCCCAAACATCTGTGTACTTCTGTGCCAGCAGTTACCGGATAGCGGGGGGGGGCCAAGAGACCCAGTACTTCGGGCCA	CASSYRIAGGGQETQYF	10	8.86831e-05	TCRBV06	TCRBD02-01*01	TCRBJ02-05*01
CGCACAGAGCAGCGGGACTCAGCCATGTATCGCTGTGCCAGCAGCTCGGGACGGGCAGAATCGCAAGAGACCCAGTACTTCGGGCCA	CASSSGRAESQETQYF	10	8.86831e-05	TCRBV07-07*01	unknown	TCRBJ02-05*01
CTCACTGTGACATCGGCCCAAAAGAACCCGACAGCTTTCTATCTCTGTGCCAGTGCGGACCCCGTGGCTGAAGCTTTCTTTGGACAA	CASADPVAEAFF	10	8.86831e-05	TCRBV19-01	unknown	TCRBJ01-01*01
ATCCGGTCCACAAAGCTGGAGGACTCAGCCATGTACTTCTGTGCCAGCAAGCGGACAGGGGGCTCCTACGAGCAGTACTTCGGGCCG	CASKRTGGSYEQYF	10	8.86831e-05	TCRBV02-01*01	TCRBD01-01*01	TCRBJ02-07*01
ATCCAGCGCACACAGCAGGAGGACTCGGCCGTGTATCTCTGTGCCAGCTCAAAGGACAGGGGAGAAGAGACCCAGTACTTCGGGCCA	CASSKDRGEETQYF	10	8.86831e-05	TCRBV07-02*01	TCRBD01-01*01	TCRBJ02-05*01
CACGCCCTGCAGCCAGAAGACTCAGCCCTGTATCTCTGCGCCAGCAGCCAACTAGACACGAACACCGGGGAGCTGTTTTTTGGAGAA	CASSQLDTNTGELFF	10	8.86831e-05	TCRBV04-01*01	unknown	TCRBJ02-02*01
GCCTTGGAGCTGGACGACTCGGCCCTGTATCTCTGTGCCAGCAGCCCCGCCAGGGACAGGGGGACCTACGAGCAGTACTTCGGGCCG	CASSPARDRGTYEQYF	10	8.86831e-05	TCRBV05-04*01	TCRBD01-01*01	TCRBJ02-07*01
ACATCGGCCCAAAAGAACCCGACAGCTTTCTATCTCTGTGCCAGTAGTATCGACAGGGCGGACTACAATGAGCAGTTCTTCGGGCCA	CASSIDRADYNEQFF	10	8.86831e-05	TCRBV19-01	TCRBD01-01*01	TCRBJ02-01*01
ACCAGTGCCCATCCTGAAGACAGCAGCTTCTACATCTGCAGTGCTACCCCCCGGACAGGGATCAATCAGCCCCAGCATTTTGGTGAT	CSATPRTGINQPQHF	10	8.86831e-05	TCRBV20	TCRBD01-01*01	TCRBJ01-05*01
ATCCGGTCCACAAAGCTGGAGGACTCAGCCATGTACTTCTGTGCCAGCAGTGAGTTAAATAGCAATCAGCCCCAGCATTTTGGTGAT	CASSELNSNQPQHF	10	8.86831e-05	TCRBV02-01*01	TCRBD02-01	TCRBJ01-05*01
TCGGCTGCTCCCTCCCAGACATCTGTGTACTTCTGTGCCAGCAGTGAATATCGGGGCCCGACCTACAATGAGCAGTTCTTCGGGCCA	CASSEYRGPTYNEQFF	10	8.86831e-05	TCRBV06-01*01	unknown	TCRBJ02-01*01
GTGAGCACCTTGGAGCTGGGGGACTCGGCCCTTTATCTTTGCGCCAGCAGCTCGGGGGACGGTGACACTGAAGCTTTCTTTGGACAA	CASSSGDGDTEAFF	10	8.86831e-05	TCRBV05-01*01	TCRBD02-01*01	TCRBJ01-01*01
CGCACACAGCAGGAGGACTCGGCCGTGTATCTCTGTGCCAGCAGCTTAACGTCAGGAGGCTCTGGAAACACCATATATTTTGGAGAG	CASSLTSGGSGNTIYF	10	8.86831e-05	TCRBV07-02*01	TCRBD02-01*02	TCRBJ01-03*01
ACCAGTGCCCATCCTGAAGACAGCAGCTTCTACATCTGCAGTGCTAGAGAAGGTAGCGGGGAGGGAAAGACCCAGTACTTCGGGCCA	CSAREGSGEGKTQYF	10	8.86831e-05	TCRBV20	TCRBD02-01*01	TCRBJ02-05*01
GCCTTGTTGCTGGGGGACTCGGCCCTCTATCTCTGTGCCAGCAGCTTGGACAGGTTCAGCCTCTCCTACGAGCAGTACTTCGGGCCG	CASSLDRFSLSYEQYF	10	8.86831e-05	TCRBV05-06*01	TCRBD01-01*01	TCRBJ02-07*01
GCTGCTCCCTCCCAGACATCTGTGTACTTCTGTGCCAGCAGTTACTCAGGCAGGGTTGGAACCAAAAACATTCAGTACTTCGGCGCC	CASSYSGRVGTKNIQYF	10	8.86831e-05	TCRBV06	TCRBD01-01*01	TCRBJ02-04*01
CAGCGCACACAGCAGGAGGACTCGGCCGTGTATCTCTGTGCCAGCAGCTCCGCGGGGGGACCGCAAGAGACCCAGTACTTCGGGCCA	CASSSAGGPQETQYF	10	8.86831e-05	TCRBV07-02*01	TCRBD02-01*01	TCRBJ02-05*01
AGGATCCAGCAGGTAGTGCGAGGAGATTCGGCAGCTTATTTCTGTGCCAGCTCACCGGACGGGACCTATGGCTACACCTTCGGTTCG	CASSPDGTYGYTF	10	8.86831e-05	TCRBV18-01*01	unknown	TCRBJ01-02*01
CTGACAGTGACCAGTGCCCATCCTGAAGACAGCAGCTTCTACATCTGCAGTGTCAGACAGGGGAACACTGAAGCTTTCTTTGGACAA	CSVRQGNTEAFF	10	8.86831e-05	TCRBV20	TCRBD01-01*01	TCRBJ01-01*01
CACATCAATTCCCTGGAGCTTGGTGACTCTGCTGTGTATTTCTGTGCCAGCACTCGCGGGGGGGGCTTCGAGCAGTACTTCGGGCCG	CASTRGGGFEQYF	10	8.86831e-05	TCRBV03	TCRBD02-01*01	TCRBJ02-07*01
AATTCCCTGGAGCTTGGTGACTCTGCTGTGTATTTCTGTGCCAGCAGCCCGACCGGGACTAGCACAGATACGCAGTATTTTGGCCCA	CASSPTGTSTDTQYF	10	8.86831e-05	TCRBV03	TCRBD02-01	TCRBJ02-03*01
CTGCTGTCGGCTGCTCCCTCCCAGACATCTGTGTACTTCTGTGCCAGCAGGAGGGACGGAAGCTCCTACGAGCAGTACTTCGGGCCG	CASRRDGSSYEQYF	10	8.86831e-05	TCRBV06-05*01	unknown	TCRBJ02-07*01
ACAGTGACCAGTGCCCATCCTGAAGACAGCAGCTTCTACATCTGCAGTGCTGCGAAGGGCAGGGTAGATGAAGCTTTCTTTGGACAA	CSAAKGRVDEAFF	10	8.86831e-05	TCRBV20	TCRBD01-01*01	TCRBJ01-01*01
CTGCAGCCAGAAGACTCGGCCCTGTATCTCTGTGCCAGCAGCCAAGGTCAGGTGGGCGGCCCTTACAATGAGCAGTTCTTCGGGCCA	CASSQGQVGGPYNEQFF	10	8.86831e-05	TCRBV04-02*01	unknown	TCRBJ02-01*01
CTGTCCCTAGAGTCTGCCATCCCCAACCAGACAGCTCTTTACTTCTGTGCCACCAGTGACCGCGATCGCTCGTTGTATTTTGGCCCA	CATSDRDRSLYF	10	8.86831e-05	TCRBV24	TCRBD02-01	TCRBJ02-03*01
ACCCTGCAGCCAGAAGACTCGGCCCTGTATCTCTGCGCCAGCAGCCAAGGGGTTGCGTATGGGGACACTGAAGCTTTCTTTGGACAA	CASSQGVAYGDTEAFF	10	8.86831e-05	TCRBV04-03*01	unknown	TCRBJ01-01*01
ATCCAGCCCTCAGAACCCAGGGACTCAGCTGTGTACTTCTGTGCCAGCAGCGGGACAGGATCGTCCTACGAGCAGTACTTCGGGCCG	CASSGTGSSYEQYF	10	8.86831e-05	TCRBV12	TCRBD01-01*01	TCRBJ02-07*01
GTGAGCAACATGAGCCCTGAAGACAGCAGCATATATCTCTGCAGCGTTGATTTCGGGGTAGTTAATTCACCCCTCCACTTTGGGAAC	CSVDFGVVNSPLHF	10	8.86831e-05	TCRBV29-01*01	TCRBD02-01*01	TCRBJ01-06*01
CAGCGCACACAGCAGGAGGACTCGGCCGTGTATCTCTGTGCCAGCAGCCAAACGGGGGGACGCTACAATGAGCAGTTCTTCGGGCCA	CASSQTGGRYNEQFF	10	8.86831e-05	TCRBV07-02*01	TCRBD02-01*01	TCRBJ02-01*01
AAGATCCAGCGCACAGAGCGGGGGGACTCAGCCGTGTATCTCTGTGCCAGCAGCTTATCGGCGAACACTGAAGCTTTCTTTGGACAA	CASSLSANTEAFF	10	8.86831e-05	TCRBV07-03*01	unknown	TCRBJ01-01*01
GCTCCCTCCCAAACATCTGTGTACTTCTGTGCCAGCAGTTTTTTCGGTCGAGGGGGCCCCAGCACAGATACGCAGTATTTTGGCCCA	CASSFFGRGGPSTDTQYF	10	8.86831e-05	TCRBV06	TCRBD01-01*01	TCRBJ02-03*01
AGCACCTTGGAGCTGGGGGACTCGGCCCTTTATCTTTGCGCCAGCAGCTTGGGGCTAGCCAACCATGGGGAGCAGTACTTCGGGCCG	CASSLGLANHGEQYF	10	8.86831e-05	TCRBV05-01*01	TCRBD02-01	TCRBJ02-07*01
CGGTCCACAAAGCTGGAGGACTCAGCCATGTACTTCTGTGCCAGCAGCCCCACAGGGGGCGGTAATGAAAAACTGTTTTTTGGCAGT	CASSPTGGGNEKLFF	10	8.86831e-05	TCRBV02-01*01	TCRBD01-01*01	TCRBJ01-04*01
CAGCGCACACAGCAGGAGGACTCCGCCGTGTATCTCTGTGCCAGCAGCGACCGGACAGAATGGTCCGGGGAGCTGTTTTTTGGAGAA	CASSDRTEWSGELFF	10	8.86831e-05	TCRBV07-08*01	TCRBD01-01*01	TCRBJ02-02*01
CTGACTGTGAGCAACATGAGCCCTGAAGACAGCAGCATATATCTCTGCAGCGTTGAACAGTTACAAGAGACCCAGTACTTCGGGCCA	CSVEQLQETQYF	10	8.86831e-05	TCRBV29-01*01	TCRBD01-01*01	TCRBJ02-05*01
AATGTGAGCACCTTGGAGCTGGGGGACTCGGCCCTTTATCTTTGCGCCAGCAGCCCCCAAGCGGCCGGGGAGCTGTTTTTTGGAGAA	CASSPQAAGELFF	10	8.86831e-05	TCRBV05-01*01	TCRBD02-01	TCRBJ02-02*01
CGCACACAGCAGGAGGACTCGGCCGTGTATCTCTGTGCCAGCAGCTTTCACAGGGCCCCCTCTGGAAACACCATATATTTTGGAGAG	CASSFHRAPSGNTIYF	10	8.86831e-05	TCRBV07-02*01	TCRBD01-01*01	TCRBJ01-03*01
ACGATCCAGCGCACACAGCAGGAGGACTCGGCCGTGTATCTCTGTGCCAGCAGCGTAGGACCTAATTCACCCCTCCACTTTGGGAAC	CASSVGPNSPLHF	10	8.86831e-05	TCRBV07-02*01	unknown	TCRBJ01-06*01
TCGGCTGCTCCCTCCCAAACATCTGTGTACTTCTGTGCCAGCAGTACCCATAGCGGGGGGGCTGGTAATGAGCAGTTCTTCGGGCCA	CASSTHSGGAGNEQFF	10	8.86831e-05	TCRBV06	TCRBD02-01*01	TCRBJ02-01*01
AGCTCTCTGGAGCTGGGGGACTCAGCTTTGTATTTCTGTGCCAGCAGCGTAGTTGGGGGTTCTGGAAACACCATATATTTTGGAGAG	CASSVVGGSGNTIYF	10	8.86831e-05	TCRBV09-01	unknown	TCRBJ01-03*01
GTGACCAGTGCCCATCCTGAAGACAGCAGCTTCTACATCTGCAGTGCTAGAGACAGGCTGGGGGGAAACACCATATATTTTGGAGAG	CSARDRLGGNTIYF	10	8.86831e-05	TCRBV20	unknown	TCRBJ01-03*01
ACATCGGCCCAAAAGAACCCGACAGCTTTCTATCTCTGTGCCAGTAGTATAGGTGGCCCTAGAGCAGATACGCAGTATTTTGGCCCA	CASSIGGPRADTQYF	10	8.86831e-05	TCRBV19-01	TCRBD02-01	TCRBJ02-03*01
ACTCTGACTGTGAGCAACATGAGCCCTGAAGACAGCAGCATATATCTCTGCAGCGTCCACAACGGTGAAAAACTGTTTTTTGGCAGT	CSVHNGEKLFF	10	8.86831e-05	TCRBV29-01*01	unknown	TCRBJ01-04*01
ACTGTGACATCGGCCCAAAAGAACCCGACAGCTTTCTATCTCTGTGCCAGTAGGCCTTCCGGGACAGATACGCAGTATTTTGGCCCA	CASRPSGTDTQYF	10	8.86831e-05	TCRBV19-01	TCRBD02-01	TCRBJ02-03*01
ATCCAGCGCACACAGCAGGAGGACTCGGCCGTGTATCTCTGTGCCAGCAGCTTAGTGGGGGGGTTGGAGACCCAGTACTTCGGGCCA	CASSLVGGLETQYF	10	8.86831e-05	TCRBV07-02*01	TCRBD02-01*01	TCRBJ02-05*01
AAGATCCAGCCCTCAGAACCCAGGGACTCAGCTGTGTACTTCTGTGCCAGCAGTTTCGCTGGGGCCAACGTCCTGACTTTCGGGGCC	CASSFAGANVLTF	10	8.86831e-05	TCRBV12	TCRBD02-01	TCRBJ02-06*01
CTTCACATCAATTCCCTGGAGCTTGGTGACTCTGCTGTGTATTTCTGTGCCAGCCGGGGTTTATCCTACGAGCAGTACTTCGGGCCG	CASRGLSYEQYF	10	8.86831e-05	TCRBV03	TCRBD02-01*01	TCRBJ02-07*01
TCCCTGGAGCTTGGTGACTCTGCTGTGTATTTCTGTGCCAGCAGCCGATTGGGGGGGCAAAATTCCGGCGAGCAGTACTTCGGGCCG	CASSRLGGQNSGEQYF	10	8.86831e-05	TCRBV03	TCRBD02-01*01	TCRBJ02-07*01
AGCACCTTGGAGCTGGGGGACTCGGCCCTTTATCTTTGCGCCAGCAGCTTGATGGCAGGGGCGGACAATGAGCAGTTCTTCGGGCCA	CASSLMAGADNEQFF	10	8.86831e-05	TCRBV05-01*01	TCRBD01-01*01	TCRBJ02-01*01
GAACTAAACCTGAGCTCTCTGGAGCTGGGGGACTCAGCTTTGTATTTCTGTGCCAGCAGCGCCACAGATACGCAGTATTTTGGCCCA	CASSATDTQYF	10	8.86831e-05	TCRBV09-01	unknown	TCRBJ02-03*01
TCGGCCCAAAAGAACCCGACAGCTTTCTATCTCTGTGCCAGTAAGGGTCAGGAAACGATCTCTGGAAACACCATATATTTTGGAGAG	CASKGQETISGNTIYF	10	8.86831e-05	TCRBV19-01	unknown	TCRBJ01-03*01
ACTCTGACAGTGACCAGTGCCCATCCTGAAGACAGCAGCTTCTACATCTGCAGTGCTACGGGGACTAGGGAGCAGTACTTCGGGCCG	CSATGTREQYF	10	8.86831e-05	TCRBV20-01*01	TCRBD02-01	TCRBJ02-07*01
AACCTTCACCTACACGCCCTGCAGCCAGAAGACTCAGCCCTGTATCTCTGCGCCAGCAGCCAAGGGCAGGGGCAGTACTTCGGGCCG	CASSQGQGQYF	10	8.86831e-05	TCRBV04-01*01	TCRBD01-01*01	TCRBJ02-07*01
GTGACATCGGCCCAAAAGAACCCGACAGCTTTCTATCTCTGTGCCAGTAGTATACTACAGGGGAACACTGAAGCTTTCTTTGGACAA	CASSILQGNTEAFF	10	8.86831e-05	TCRBV19-01	TCRBD01-01*01	TCRBJ01-01*01
ATCCAGCGCACACAGCAGGAGGACTCGGCCGTGTATCTCTGTGCCAGCAGCTTAAACAGAGCCCGGTATGGCTACACCTTCGGTTCG	CASSLNRARYGYTF	10	8.86831e-05	TCRBV07-02*01	TCRBD01-01*01	TCRBJ01-02*01
CTCACTCTGGAGTCCGCTACCAGCTCCCAGACATCTGTGTACTTCTGTGCCACCGCAAACCCTAACTATGGCTACACCTTCGGTTCG	CATANPNYGYTF	10	8.86831e-05	TCRBV10-03*01	unknown	TCRBJ01-02*01
GAGTCGGCTGCTCCCTCCCAAACATCTGTGTACTTCTGTGCCAGCAGCCGACGACAGGGTTCAAGGCAGCCCCAGCATTTTGGTGAT	CASSRRQGSRQPQHF	10	8.86831e-05	TCRBV06	TCRBD01-01*01	TCRBJ01-05*01
GAGATCCAGCGCACAGAGCAGGGGGACTCGGCCATGTATCTCTGTGCCAGCAGCTTACACGGCAGTTCACCCCTCCACTTTGGGAAC	CASSLHGSSPLHF	10	8.86831e-05	TCRBV07-09	unknown	TCRBJ01-06*01
AATGTGAGCACCTTGGAGCTGGGGGACTCGGCCCTTTATCTTTGCGCCAGCAGCCTGCCTAGCCAAGAGACCCAGTACTTCGGGCCA	CASSLPSQETQYF	10	8.86831e-05	TCRBV05-01*01	TCRBD02-01	TCRBJ02-05*01
TCCACTCTGACAGTGACCAGTGCCCATCCTGAAGACAGCAGCTTCTACATCTGCAGTGCTAGTTACGATGAAGCTTTCTTTGGACAA	CSASYDEAFF	10	8.86831e-05	TCRBV20-01*01	unknown	TCRBJ01-01*01
ACTCTGGAGTCAGCTACCCGCTCCCAGACATCTGTGTATTTCTGCGCCAGCAGTGACGGAATAAACTATGGCTACACCTTCGGTTCG	CASSDGINYGYTF	10	8.86831e-05	TCRBV10-02*01	unknown	TCRBJ01-02*01
AGGCTGGAGTTGGCTGCTCCCTCCCAGACATCTGTGTACTTCTGTGCCAGCAGTTACTCGAATGAAGGCGAGCAGTTCTTCGGGCCA	CASSYSNEGEQFF	10	8.86831e-05	TCRBV06-06	unknown	TCRBJ02-01*01
CAGGTAGTGCGAGGAGATTCGGCAGCTTATTTCTGTGCCAGCTCACAGAGACTAACCTTAAACACCGGGGAGCTGTTTTTTGGAGAA	CASSQRLTLNTGELFF	10	8.86831e-05	TCRBV18-01*01	TCRBD02-01	TCRBJ02-02*01
CTGACTGTGAGCAACATGAGCCCTGAAGACAGCAGCATATATCTCTGCAGCGTAGCCACAGCGAACACTGAAGCTTTCTTTGGACAA	CSVATANTEAFF	10	8.86831e-05	TCRBV29-01*01	TCRBD01-01*01	TCRBJ01-01*01
ACATTCTCAACTCTGACTGTGAGCAACATGAGCCCTGAAGACAGCAGCATATATCTCTGCAGCGTTCTCGGAGCTTTCTTTGGACAA	CSVLGAFF	10	8.86831e-05	TCRBV29-01*01	TCRBD02-01	TCRBJ01-01*01
GAATCCTTTCCTCTCACTGTGACATCGGCCCAAAAGAACCCGACAGCTTTCTATCTCTGTGCCAGTAGTATCACCTTGTGGGGGCCG	CASSITLW	10	8.86831e-05	TCRBV19-01	unknown	TCRBJ02-07*01
AAGATCCAGCCTGCAGAGCTTGGGGACTCGGCCGTGTATCTCTGTGCCAGCAGCGTCGTTGGGGGAACTGAAGCTTTCTTTGGACAA	CASSVVGGTEAFF	10	8.86831e-05	TCRBV11-03*01	unknown	TCRBJ01-01*01
CTCAGGCTGCTGTCGGCTGCTCCCTCCCAGACATCTGTGTACTTCTGTGCCAGCAGTTCCGGGGCTGGTGGCTACACCTTCGGTTCG	CASSSGAGGYTF	10	8.86831e-05	TCRBV06-05*01	unknown	TCRBJ01-02*01
CTACACACCCTGCAGCCAGAAGACTCGGCCCTGTATCTCTGCGCCAGCAGCCAGTTCGGGGGGGCTTACGAGCAGTACTTCGGGCCG	CASSQFGGAYEQYF	10	8.86831e-05	TCRBV04-03*01	TCRBD02-01*01	TCRBJ02-07*01
ACGTTGGCGTCTGCTGTACCCTCTCAGACATCTGTGTACTTCTGTGCCAGCAGTATGGGGTTCGATCAGCCCCAGCATTTTGGTGAT	CASSMGFDQPQHF	10	8.86831e-05	TCRBV06-04	unknown	TCRBJ01-05*01
ACGATCCAGCGCACAGAGCAGCGGGACTCGGCCATGTATCGCTGTGCCAGCAGCCCCCGGGCGGGTTATGGCTACACCTTCGGTTCG	CASSPRAGYGYTF	10	8.86831e-05	TCRBV07-06*01	TCRBD02-01	TCRBJ01-02*01
GAGTCGGCTGCTCCCTCCCAGACATCTGTGTACTTCTGTGCCGGATCCTCTAGCGGGGGGGCCCGAGAGACCCAGTACTTCGGGCCA	CAGSSSGGARETQYF	10	8.86831e-05	TCRBV06-01*01	TCRBD02-01*01	TCRBJ02-05*01
ACTCTGACTGTGAGCAACATGAGCCCTGAAGACAGCAGCATATATCTCTGCAGCGTTCAGGAATACTCTGGCTACACCTTCGGTTCG	CSVQEYSGYTF	10	8.86831e-05	TCRBV29-01*01	TCRBD01-01*01	TCRBJ01-02*01
TCTCTGGAGCTGGGGGACTCAGCTTTGTATTTCTGTGCCAGCAGCGCATTCGTAGCGGGGGCAAACAATGAGCAGTTCTTCGGGCCA	CASSAFVAGANNEQFF	10	8.86831e-05	TCRBV09-01	TCRBD02-01*01	TCRBJ02-01*01
ATCCAGCCTGCAAAGCTTGAGGACTCGGCCGTGTATCTCTGTGCCAGCAGCGCCGGGACACCTGGGGAGACCCAGTACTTCGGGCCA	CASSAGTPGETQYF	10	8.86831e-05	TCRBV11-02*02	TCRBD01-01*01	TCRBJ02-05*01
ACCTTGGAGATCCAGCGCACAGAGCAGGGGGACTCGGCCATGTATCTCTGTGCCAGCAGGGGTGGCACTGAAGCTTTCTTTGGACAA	CASRGGTEAFF	10	8.86831e-05	TCRBV07-09	unknown	TCRBJ01-01*01
ATCCTGGAGTCGCCCAGCCCCAACCAGACCTCTCTGTACTTCTGTGCCAGCAGTTTAATAATGGAGTCCGGGCAGTACTTCGGGCCG	CASSLIMESGQYF	10	8.86831e-05	TCRBV27-01*01	TCRBD02-01*02	TCRBJ02-07*01
GTGACCAGTGCCCATCCTGAAGACAGCAGCTTCTACATCTGCAGTGCTAGAGAGGGACAGGGAGTCTACGAGCAGTACTTCGGGCCG	CSAREGQGVYEQYF	10	8.86831e-05	TCRBV20	TCRBD01-01*01	TCRBJ02-07*01
TTCTCCCTGTCCCTAGAGTCTGCCATCCCCAACCAGACAGCTCTTTACTTCTGTGCCGCCCCGAACAATGAGCAGTTCTTCGGGCCA	CAAPNNEQFF	10	8.86831e-05	TCRBV24	unknown	TCRBJ02-01*01
ATCCGGTCCACAAAGCTGGAGGACTCAGCCATGTACTTCTGTGCCAGCAGTGAAGACGTGAGTGACTATGGCTACACCTTCGGTTCG	CASSEDVSDYGYTF	10	8.86831e-05	TCRBV02-01*01	TCRBD02-01*02	TCRBJ01-02*01
ACTGTGAGCAACATGAGCCCTGAAGACAGCAGCATATATCTCTGCAGCGTTAGAAGGCAGAACACCGGGGAGCTGTTTTTTGGAGAA	CSVRRQNTGELFF	10	8.86831e-05	TCRBV29-01*01	unknown	TCRBJ02-02*01
CACGCCCTGCAGCCAGAAGACTCAGCCCTGTATCTCTGCGCCAGCAGCCAGGGCCGGGGGGGGAACGATGAGCAGTTCTTCGGGCCA	CASSQGRGGNDEQFF	10	8.86831e-05	TCRBV04-01*01	TCRBD02-01*01	TCRBJ02-01*01
AATGTGAGCACCTTGGAGCTGGGGGACTCGGCCCTTTATCTTTGCGCCAGCAGCCCCTCCGGGTGGAATGGCTACACCTTCGGTTCG	CASSPSGWNGYTF	10	8.86831e-05	TCRBV05-01*01	TCRBD02-01	TCRBJ01-02*01
GTGCAGCCTGCAGAACTGGAGGATTCTGGAGTTTATTTCTGTGCCAGCAGCCAAGGTGTAAGATCCGTGACCCAGTACTTCGGGCCA	CASSQGVRSVTQYF	10	8.86831e-05	TCRBV14-01*01	unknown	TCRBJ02-05*01
ATCCAGCCTGCAAAGCTTGAGGACTCGGCCGTGTATCTCTGTGCCAGCAGCTTAGACCCCGGGACTAGCGCGCAGTATTTTGGCCCA	CASSLDPGTSAQYF	10	8.86831e-05	TCRBV11-02*02	TCRBD02-01	TCRBJ02-03*01
AGGCTGGAGTCGGCTGCTCCCTCCCAGACATCTGTGTACTTCTGTGCCAGCGTAGCGGGCTCCTACAATGAGCAGTTCTTCGGGCCA	CASVAGSYNEQFF	10	8.86831e-05	TCRBV06-01*01	TCRBD02-01	TCRBJ02-01*01
AGCTCTCTGGAGCTGGGGGACTCAGCTTTGTATTTCTGTGCCAGCAGCGTAGGAGAGACAGCAAATGAAAAACTGTTTTTTGGCAGT	CASSVGETANEKLFF	10	8.86831e-05	TCRBV09-01	TCRBD01-01*01	TCRBJ01-04*01
CTGGAGTCGGCTGCTCCCTCCCAGACATCTGTGTACTTCTGTGCCAGCAGTGAAGGACAGGGAGGATCACCCCTCCACTTTGGGAAC	CASSEGQGGSPLHF	10	8.86831e-05	TCRBV06-01*01	TCRBD01-01*01	TCRBJ01-06*01
GTGAGCACCTTGGAGCTGGGGGACTCGGCCCTTTATCTTTGCGCCAGCAGCTTGCAGGGTATGAACTATGGCTACACCTTCGGTTCG	CASSLQGMNYGYTF	10	8.86831e-05	TCRBV05-01*01	TCRBD01-01*01	TCRBJ01-02*01
ACTCTGACAGTGACCAGTGCCCATCCTGAAGACAGCAGCTTCTACATCTGCAGTGCTGACGAACGGGAGACCCAGTACTTCGGGCCA	CSADERETQYF	10	8.86831e-05	TCRBV20-01*01	unknown	TCRBJ02-05*01
CACGCCCTGCAGCCAGAAGACTCAGCCCTGTATCTCTGCGCCAGCAGCCAAGTGGACAGCAACACCGGGGAGCTGTTTTTTGGAGAA	CASSQVDSNTGELFF	10	8.86831e-05	TCRBV04-01*01	TCRBD01-01*01	TCRBJ02-02*01
CAGACATCTGTATATTTCTGCGCCAGAAGCTCCCCGGGTTGGGACCGGGACAGGGTTTTGGGGAACACTGAAGCTTTCTTTGGACAA	CARSSPGWDRDRVLGNTEAFF	10	8.86831e-05	TCRBV10-01	TCRBD01-01*01	TCRBJ01-01*01
ATCCAGCGCACACAGCAGGAGGACTCGGCCGTGTATCTCTGTGCCAGCAGCTTAGCGCTCCGAACAGATACGCAGTATTTTGGCCCA	CASSLALRTDTQYF	10	8.86831e-05	TCRBV07-02*01	unknown	TCRBJ02-03*01
GAGTCGGCTGCTCCCTCCCAGACATCTGTGTACTTCTGTGCCAGCAGTGAGAAGGTGGCAGGAAATCAGCCCCAGCATTTTGGTGAT	CASSEKVAGNQPQHF	10	8.86831e-05	TCRBV06-01*01	TCRBD01-01*01	TCRBJ01-05*01
CCCTCAGAACCCAGGGACTCAGCTGTGTACTTCTGTGCCAGCAGCTACAGATTACAGGAGGTCAATCAGCCCCAGCATTTTGGTGAT	CASSYRLQEVNQPQHF	10	8.86831e-05	TCRBV12	unknown	TCRBJ01-05*01
GCTGCTCCCTCCCAGACATCTGTGTACTTCTGTGCCAGCAGTGAATTTGGCAGGGCGGGGGCTAATGAAAAACTGTTTTTTGGCAGT	CASSEFGRAGANEKLFF	10	8.86831e-05	TCRBV06-01*01	TCRBD02-01*01	TCRBJ01-04*01
CAGCGCACAGAGCGGGGGGACTCAGCCGTGTATCTCTGTGCCAGCAGCCAGGGACTAGCGGGGTGGCAGACCCAGTACTTCGGGCCA	CASSQGLAGWQTQYF	10	8.86831e-05	TCRBV07-03*01	TCRBD02-01*01	TCRBJ02-05*01
ACCCTGGAGTCTGCCAGGCCCTCACATACCTCTCAGTACCTCTGTGCCAGCGGGGACAGGGGGCCGGGTACGCAGTATTTTGGCCCA	CASGDRGPGTQYF	10	8.86831e-05	TCRBV25-01*01	TCRBD01-01*01	TCRBJ02-03*01
TCGGCTGCTCCCTCCCAGACATCTGTGTACTTCTGTGCCAGCAGCGAAGGGTTAACTAGCGTGACAGATACGCAGTATTTTGGCCCA	CASSEGLTSVTDTQYF	10	8.86831e-05	TCRBV06-01*01	TCRBD02-01	TCRBJ02-03*01
AATTCCCTGGAGCTTGGTGACTCTGCTGTGTATTTCTGTGCCAGCAGTTATGCAGGGGGCTCTGGAAACACCATATATTTTGGAGAG	CASSYAGGSGNTIYF	10	8.86831e-05	TCRBV03	TCRBD01-01*01	TCRBJ01-03*01
GCCCTGCAGCCAGAAGACTCAGCCCTGTATCTCTGCGCCAGCAGCCAAGATGGGACCGTCAGAAATTCACCCCTCCACTTTGGGAAC	CASSQDGTVRNSPLHF	9	7.98148e-05	TCRBV04-01*01	unknown	TCRBJ01-06*01
GGGTTGGAGTCGGCTGCTCCCTCCCAAACATCTGTGTACTTCTGTGCCAGCACCGACAGCAGCACAGATACGCAGTATTTTGGCCCA	CASTDSSTDTQYF	9	7.98148e-05	TCRBV06	TCRBD01-01*01	TCRBJ02-03*01
CACGCCCTGCAGCCAGAAGACTCAGCCCTGTATCTCTGCGCCAGCAGCCAAGATGGGGGGCGCTCCTACGAGCAGTACTTCGGGCCG	CASSQDGGRSYEQYF	9	7.98148e-05	TCRBV04-01*01	unknown	TCRBJ02-07*01
ACTCTGACAGTGACCAGTGCCCATCCTGAAGACAGCAGCTTCTACATCTGCAGTGCAGGGGGAACCTACGAGCAGTACTTCGGGCCG	CSAGGTYEQYF	9	7.98148e-05	TCRBV20-01*01	TCRBD01-01*01	TCRBJ02-07*01
CTGAATGTGAACGCCTTGTTGCTGGGGGACTCGGCCCTCTATCTCTGTGCCAGCAGAGGACAGGGGAAGACCCAGTACTTCGGGCCA	CASRGQGKTQYF	9	7.98148e-05	TCRBV05-06*01	TCRBD01-01*01	TCRBJ02-05*01
CTGCTGTCGGCTGCTCCCTCCCAGACATCTGTGTACTTCTGTGCCAGCAGTCGACAGGGGGAGGTAAATGAGCAGTTCTTCGGGCCA	CASSRQGEVNEQFF	9	7.98148e-05	TCRBV06-05*01	TCRBD01-01*01	TCRBJ02-01*01
CTGGGGTTGGAGTCGGCTGCTCCCTCCCAAACATCTGTGTACTTCTGTGCCAGCAGGGCGTTGAACACTGAAGCTTTCTTTGGACAA	CASRALNTEAFF	9	7.98148e-05	TCRBV06	unknown	TCRBJ01-01*01
TCGGCTGCTCCCTCCCAGACATCTGTGTACTTCTGTGCCAGCAGTGAATTGCGGACAGAGCCCAGCTTAGCCCAGCATTTTGGTGAT	CASSELRTEPSLAQHF	9	7.98148e-05	TCRBV06-01*01	TCRBD01-01*01	TCRBJ01-05*01
ACAGTGACCAGTGCCCATCCTGAAGACAGCAGCTTCTACATCTGCAGTGCTAGATTTCGGGGAGACACTGAAGCTTTCTTTGGACAA	CSARFRGDTEAFF	9	7.98148e-05	TCRBV20	TCRBD02-01	TCRBJ01-01*01
AGGCTGGAGTCGGCTGCTCCCTCCCAGACATCTGTGTACTTCTGTGCCAGCAGTGAATTGGGGCACCAGCCCCAGCATTTTGGTGAT	CASSELGHQPQHF	9	7.98148e-05	TCRBV06-01*01	TCRBD01-01*01	TCRBJ01-05*01
CAGCCCTCAGAACCCAGGGACTCAGCTGTGTACTTCTGTGCCAGCAGTCCGGCGGGGGACAGCTCCTACGAGCAGTACTTCGGGCCG	CASSPAGDSSYEQYF	9	7.98148e-05	TCRBV12	unknown	TCRBJ02-07*01
GTGAGTGCCTTGGAGCTGGGGGACTCGGCCCTGTATCTCTGTGCCAGAAGCTGGTCCAGGAAGGGGAGTGGCTACACCTTCGGTTCG	CARSWSRKGSGYTF	9	7.98148e-05	TCRBV05-03	unknown	TCRBJ01-02*01
ACAGTGACCAGTGCCCATCCTGAAGACAGCAGCTTCTACATCTGCAGTGCGTTGACAGGGGGAGGGACTGAAGCTTTCTTTGGACAA	CSALTGGGTEAFF	9	7.98148e-05	TCRBV20	TCRBD01-01*01	TCRBJ01-01*01
TCCACAAAGCTGGAGGACTCAGCCATGTACTTCTGTGCCAGCAGTGAAGGGAGACCGGTCTCTGGAAACACCATATATTTTGGAGAG	CASSEGRPVSGNTIYF	9	7.98148e-05	TCRBV02-01*01	TCRBD02-01*02	TCRBJ01-03*01
CAGCCCTCAGAACCCAGGGACTCAGCTGTGTACTTCTGTGCCAGCAGTTTAGGGGGACAGAACAATCAGCCCCAGCATTTTGGTGAT	CASSLGGQNNQPQHF	9	7.98148e-05	TCRBV12	TCRBD01-01*01	TCRBJ01-05*01
CTGCAGCCAGAAGACTCGGCCCTGTATCTCTGCGCCAGCAGCCTGATTAGCTTCAGGGGGCGGTGGACTGAAGCTTTCTTTGGACAA	CASSLISFRGRWTEAFF	9	7.98148e-05	TCRBV04-03*01	TCRBD01-01*01	TCRBJ01-01*01
CTCAAGATCCAGCCTGCAAAGCTTGAGGACTCGGCCGTGTATCTCTGTGCCAGCGCGGGGGACGACTCCGAGCAGTACTTCGGGCCG	CASAGDDSEQYF	9	7.98148e-05	TCRBV11-02*02	TCRBD02-01*01	TCRBJ02-07*01
CTGAGGATCCAGCAGGTAGTGCGAGGAGATTCGGCAGCTTATTTCTGTGCCAGCTCACCCGTAAACACTGAAGCTTTCTTTGGACAA	CASSPVNTEAFF	9	7.98148e-05	TCRBV18-01*01	TCRBD02-01	TCRBJ01-01*01
ACCAGTGCCCATCCTGAAGACAGCAGCTTCTACATCTGCAGTGCATATACTAGCGGGGGAGCCAAGTACGAGCAGTACTTCGGGCCG	CSAYTSGGAKYEQYF	9	7.98148e-05	TCRBV20	TCRBD02-01*01	TCRBJ02-07*01
GTGAGCACCTTGGAGCTGGGGGACTCGGCCCTTTATCTTTGCGCCAGCAGCTCCGGGGGAACTAATGAAAAACTGTTTTTTGGCAGT	CASSSGGTNEKLFF	9	7.98148e-05	TCRBV05-01*01	TCRBD02-01*01	TCRBJ01-04*01
GAGTCAGGGGACACAGCACTGTATTTCTGTGCCAGCAGCAGAGGCACTAGCGGGGGCCCGGGCACCGGGGAGCTGTTTTTTGGAGAA	CASSRGTSGGPGTGELFF	9	7.98148e-05	TCRBV21-01*01	TCRBD02-01*01	TCRBJ02-02*01
AATGTGAACGCCTTGGAGCTGGACGACTCGGCCCTGTATCTCTGTGCCAGCAGCTTAGGGGGCACGGGTGAAGCTTTCTTTGGACAA	CASSLGGTGEAFF	9	7.98148e-05	TCRBV05-04*01	TCRBD01-01*01	TCRBJ01-01*01
CTGTCGGCTGCTCCCTCCCAGACATCTGTGTACTTCTGTGCCAGCAGTTACAATAGGGGAGGAGGGTATGGCTACACCTTCGGTTCG	CASSYNRGGGYGYTF	9	7.98148e-05	TCRBV06-05*01	TCRBD02-01*02	TCRBJ01-02*01
ACGGAGTCAGGGGACACAGCACTGTATTTCTGTGCCAGCAGCAAAGCCGGCGGCAGTTATAGCAATCAGCCCCAGCATTTTGGTGAT	CASSKAGGSYSNQPQHF	9	7.98148e-05	TCRBV21-01*01	TCRBD02-01	TCRBJ01-05*01
ACCTTGGAGATCCAGCGCACAGAGCAGGGGGACTCGGCCATGTATCTCTGTGCCAGCAGCCAGAGCTACGAGCAGTACTTCGGGCCG	CASSQSYEQYF	9	7.98148e-05	TCRBV07-09	unknown	TCRBJ02-07*01
CACATCAATTCCCTGGAGCTTGGTGACTCTGCTGTGTATTTCTGTGCCAGCAGCCCCTACTCTGGAAACACCATATATTTTGGAGAG	CASSPYSGNTIYF	9	7.98148e-05	TCRBV03	TCRBD02-01	TCRBJ01-03*01
CCGCTCAGGCTGCTGTCGGCTGCTCCCTCCCAGACATCTGTGTACTTCTGTGCCACCGGACAGAACTACGAGCAGTACTTCGGGCCG	CATGQNYEQYF	9	7.98148e-05	TCRBV06-05*01	TCRBD01-01*01	TCRBJ02-07*01
CTGAGCTCTCTGGAGCTGGGGGACTCAGCTTTGTATTTCTGTGCCAGCAGCGTCAGGGCTGGGAATTCACCCCTCCACTTTGGGAAC	CASSVRAGNSPLHF	9	7.98148e-05	TCRBV09-01	TCRBD01-01*01	TCRBJ01-06*01
CAGCAGGTAGTGCGAGGAGATTCGGCAGCTTATTTCTGTGCCAGCTCACTGACAGGGATGCCCTACAATGAGCAGTTCTTCGGGCCA	CASSLTGMPYNEQFF	9	7.98148e-05	TCRBV18-01*01	TCRBD01-01*01	TCRBJ02-01*01
ATCCAGCGCACAGAGCAGCGGGACTCGGCCATGTATCGCTGTGCCAGCAGCTTAGGAGACTACACCGGGGAGCTGTTTTTTGGAGAA	CASSLGDYTGELFF	9	7.98148e-05	TCRBV07-06*01	TCRBD02-01	TCRBJ02-02*01
AGGCTGGAGTCGGCTGCTCCCTCCCAGACATCTGTGTACTTCTGTGCCAGCAACGTTCTTCAGGGCCACGAGCAGTACTTCGGGCCG	CASNVLQGHEQYF	9	7.98148e-05	TCRBV06-01*01	TCRBD01-01*01	TCRBJ02-07*01
AATGTGAGCACCTTGGAGCTGGGGGACTCGGCCCTTTATCTTTGCGCCAGCAGGTCCCTACAGGGTCATGGCTACACCTTCGGTTCG	CASRSLQGHGYTF	9	7.98148e-05	TCRBV05-01*01	TCRBD01-01*01	TCRBJ01-02*01
CAGCGCACACAGCAGGAGGACTCGGCCGTGTATCTCTGTGCCAGCAGATACAGGGTAACCCGGACCACTGAAGCTTTCTTTGGACAA	CASRYRVTRTTEAFF	9	7.98148e-05	TCRBV07-02*01	TCRBD01-01*01	TCRBJ01-01*01
GTAGTGCGAGGAGATTCGGCAGCTTATTTCTGTGCCAGCTCACGGGCTAGCGGGGGGGGTTCCTCCTACGAGCAGTACTTCGGGCCG	CASSRASGGGSSYEQYF	9	7.98148e-05	TCRBV18-01*01	TCRBD02-01*01	TCRBJ02-07*01
GAGTCGCCCAGCCCCAACCAGACCTCTCTGTACTTCTGTGCCAGCAGTTTAGTACCGGGCTTATGGAACATTCAGTACTTCGGCGCC	CASSLVPGLWNIQYF	9	7.98148e-05	TCRBV27-01*01	unknown	TCRBJ02-04*01
GTGAGCACCTTGGAGCTGGGGGACTCGGCCCTTTATCTTTGCGCCAGCAGCCGGAACGCGGAGAACACTGAAGCTTTCTTTGGACAA	CASSRNAENTEAFF	9	7.98148e-05	TCRBV05-01*01	TCRBD02-01	TCRBJ01-01*01
AGCTCTCTGGAGCTGGGGGACTCAGCTTTGTATTTCTGTGCCAGCAGCCCCTCGACAGGGGGGTATCAGCCCCAGCATTTTGGTGAT	CASSPSTGGYQPQHF	9	7.98148e-05	TCRBV09-01	TCRBD01-01*01	TCRBJ01-05*01
CTGGAGTCGGCTGCTCCCTCCCAGACATCTGTGTACTTCTGTGCCAGCAGCCAACAGGGGGCAATTTACGAGCAGTACTTCGGGCCG	CASSQQGAIYEQYF	9	7.98148e-05	TCRBV06-01*01	TCRBD01-01*01	TCRBJ02-07*01
GCCTTGTTGCTGGGGGACTCGGCCCTGTATCTCTGTGCCAGCAGCCCCGGTCGGGGGCAGGGGTTCACTGAAGCTTTCTTTGGACAA	CASSPGRGQGFTEAFF	9	7.98148e-05	TCRBV05-05*01	unknown	TCRBJ01-01*01
GAGTTGGCTGCTCCCTCCCAGACATCTGTGTACTTCTGTGCCAGCAGTTTACTAGCGGGGGGGCTCTCCGAGCAGTACTTCGGGCCG	CASSLLAGGLSEQYF	9	7.98148e-05	TCRBV06-06	TCRBD02-01*01	TCRBJ02-07*01
CAGGTAGTGCGAGGAGATTCGGCAGCTTATTTCTGTGCCAGCTCACCCTCCACGGGACAGGGGAATCAGCCCCAGCATTTTGGTGAT	CASSPSTGQGNQPQHF	9	7.98148e-05	TCRBV18-01*01	TCRBD01-01*01	TCRBJ01-05*01
GTGAACGCCTTGTTGCTGGGGGACTCGGCCCTGTATCTCTGTGCCAGCACTGACAGGCCCCAAAATTCACCCCTCCACTTTGGGAAC	CASTDRPQNSPLHF	9	7.98148e-05	TCRBV05-05*01	TCRBD01-01*01	TCRBJ01-06*01
ACGATCCAGCGCACACAGCAGGAGGACTCGGCCGTGTATCTCTGTGCCAGCAGCGAAGGACAGGCCTATGGCTACACCTTCGGTTCG	CASSEGQAYGYTF	9	7.98148e-05	TCRBV07-02*01	TCRBD01-01*01	TCRBJ01-02*01
CAGCCCTCAGAACCCAGGGACTCAGCTGTGTACTTCTGTGCCAGCAGTTTCCCCGGTAGGAGGAACACTGAAGCTTTCTTTGGACAA	CASSFPGRRNTEAFF	9	7.98148e-05	TCRBV12	TCRBD02-01*02	TCRBJ01-01*01
AGGCTGCTGTCGGCTGCTCCCTCCCAGACATCTGTGTACTTCTGTGCCAGCAGCCCGACGGCTGGAAACACCATATATTTTGGAGAG	CASSPTAGNTIYF	9	7.98148e-05	TCRBV06-05*01	unknown	TCRBJ01-03*01
ATCCAGCAGGTAGTGCGAGGAGATTCGGCAGCTTATTTCTGTGCCAGCTCACCCGCAAGGGGGAACACTGAAGCTTTCTTTGGACAA	CASSPARGNTEAFF	9	7.98148e-05	TCRBV18-01*01	TCRBD01-01*01	TCRBJ01-01*01
CGGTCCACAAAGCTGGAGGACTCAGCCATGTACTTCTGTGCCAGCAGGGATCGGACAGGGGGGAATCAGCCCCAGCATTTTGGTGAT	CASRDRTGGNQPQHF	9	7.98148e-05	TCRBV02-01*01	TCRBD01-01*01	TCRBJ01-05*01
GCCCAAAAGAACCCGACAGCTTTCTATCTCTGTGCCAGTAGTATTACTACCGGGACAGGGTATAATTCACCCCTCCACTTTGGGAAC	CASSITTGTGYNSPLHF	9	7.98148e-05	TCRBV19-01	TCRBD01-01*01	TCRBJ01-06*01
AGCAACATGAGCCCTGAAGACAGCAGCATATATCTCTGCAGCGTTACATATTACACAGGGAGCCGAGAGACCCAGTACTTCGGGCCA	CSVTYYTGSRETQYF	9	7.98148e-05	TCRBV29-01*01	TCRBD01-01*01	TCRBJ02-05*01
AATGTGAGCACCTTGGAGCTGGGGGACTCGGCCCTTTATCTTTGCGCCAGCAGCATAGCGGGGGACAATGAGCAGTTCTTCGGGCCA	CASSIAGDNEQFF	9	7.98148e-05	TCRBV05-01*01	TCRBD02-01*01	TCRBJ02-01*01
ACTGTGACATCGGCCCAAAAGAACCCGACAGCTTTCTATCTCTGTGCCAGCAGGGTAGGACGCAATCAGCCCCAGCATTTTGGTGAT	CASRVGRNQPQHF	9	7.98148e-05	TCRBV19-01	TCRBD01-01*01	TCRBJ01-05*01
CAGCCTGCAAAGCTTGAGGACTCGGCCGTGTATCTCTGTGCCAGCAGCTTAGAACAGGGGAAGAATTCACCCCTCCACTTTGGGAAC	CASSLEQGKNSPLHF	9	7.98148e-05	TCRBV11-02*02	TCRBD01-01*01	TCRBJ01-06*01
GAGTCGCCCAGCCCCAACCAGACCTCTCTGTACTTCTGTGCCAGCAGTCCGGGACAGGGGAGCTCCTACGAGCAGTACTTCGGGCCG	CASSPGQGSSYEQYF	9	7.98148e-05	TCRBV27-01*01	TCRBD01-01*01	TCRBJ02-07*01
TTGGAGTCGGCTGCTCCCTCCCAAACATCTGTGTACTTCTGTGCCAGCAGTTACTCGAAACAGGGTCAGCCCCAGCATTTTGGTGAT	CASSYSKQGQPQHF	9	7.98148e-05	TCRBV06	TCRBD01-01*01	TCRBJ01-05*01
AAGATCCGGTCCACAAAGCTGGAGGACTCAGCCATGTACTTCTGTGCCAGCAGTGAGGTGACGGACAATGAGCAGTTCTTCGGGCCA	CASSEVTDNEQFF	9	7.98148e-05	TCRBV02-01*01	unknown	TCRBJ02-01*01
TCTCTGGAGCTGGGGGACTCAGCTTTGTATTTCTGTGCCAGCAGCTTACGACAGGTCGTTAGCAATCAGCCCCAGCATTTTGGTGAT	CASSLRQVVSNQPQHF	9	7.98148e-05	TCRBV09-01	TCRBD01-01*01	TCRBJ01-05*01
GAGTCGCCCAGCCCCAACCAGACCTCTCTGTACTTCTGTGCCAGCAGGTTAACAGGGGGCGTCAAAAACATTCAGTACTTCGGCGCC	CASRLTGGVKNIQYF	9	7.98148e-05	TCRBV27-01*01	TCRBD01-01*01	TCRBJ02-04*01
CCTGCAGAGCTTGGGGACTCGGCCGTGTATCTCTGTGCCAGCAGCCGACGGAGTGTCAGACCTAACTATGGCTACACCTTCGGTTCG	CASSRRSVRPNYGYTF	9	7.98148e-05	TCRBV11-03*01	TCRBD02-01*02	TCRBJ01-02*01
GACATCCGCTCACCAGGCCTGGGGGACGCAGCCATGTACCTGTGTGCCACCAGCAGAGATAAACAGTCAGGGCAGTTCTTCGGGCCA	CATSRDKQSGQFF	9	7.98148e-05	TCRBV15-01*01	TCRBD01-01*01	TCRBJ02-01*01
CAGCGCACAGAGCAGCGGGACTCAGCCATGTATCGCTGTGCCAGCAGCTTACCCGGACAGATTAATCAGCCCCAGCATTTTGGTGAT	CASSLPGQINQPQHF	9	7.98148e-05	TCRBV07-07*01	TCRBD01-01*01	TCRBJ01-05*01
CTCACTCTGGAGTCAGCTACCCGCTCCCAGACATCTGTGTATTTCTGCGCCAGCAGCCGGGACAGCTATGGCTACACCTTCGGTTCG	CASSRDSYGYTF	9	7.98148e-05	TCRBV10-02*01	TCRBD01-01*01	TCRBJ01-02*01
CCGCTCAGGCTGCTGTCGGCTGCTCCCTCCCAGACATCTGTGTACTTCTGTGCCAGCAGTTCCGGGGCGGGGACACACTTCGGTTCG	CASSSGAGTHF	9	7.98148e-05	TCRBV06-05*01	unknown	TCRBJ01-02*01
GTGAGCAACATGAGCCCTGAAGACAGCAGCATATATCTCTGCAGCGTTGAAGGACCCGATGCGGGGTTGGAGCAGTACTTCGGGCCG	CSVEGPDAGLEQYF	9	7.98148e-05	TCRBV29-01*01	TCRBD02-01*01	TCRBJ02-07*01
CTGACGATCCAGCGCACACAGCAGGAGGACTCGGCCGTGTATCTCTGTGCCAGCAGCTTTCCCAATTCACCCCTCCACTTTGGGAAC	CASSFPNSPLHF	9	7.98148e-05	TCRBV07-02*01	unknown	TCRBJ01-06*01
GAGTCCGCTACCAGCTCCCAGACATCTGTGTACTTCTGTGCCATCAGTGATCCAGGGGTTGTAACCTACGAGCAGTACTTCGGGCCG	CAISDPGVVTYEQYF	9	7.98148e-05	TCRBV10-03*01	TCRBD01-01*01	TCRBJ02-07*01
AAGATCCAGCGCACACAGCAGGAGGACTCCGCCGTGTATCTCTGTGCCAGCAGCTTAGGGGCGCTCGGGGAGCAGTACTTCGGGCCG	CASSLGALGEQYF	9	7.98148e-05	TCRBV07-08*01	unknown	TCRBJ02-07*01
CAGCAGGTAGTGCGAGGAGATTCGGCAGCTTATTTCTGTGCCAGCTCTGCCGGACAGGGAAGGTTAGATGGCTACACCTTCGGTTCG	CASSAGQGRLDGYTF	9	7.98148e-05	TCRBV18-01*01	TCRBD01-01*01	TCRBJ01-02*01
TCGGCCCAAAAGAACCCGACAGCTTTCTATCTCTGTGCCAGTAAGCCTCGGGGGGCCAAAAGCAATCAGCCCCAGCATTTTGGTGAT	CASKPRGAKSNQPQHF	9	7.98148e-05	TCRBV19-01	TCRBD02-01*01	TCRBJ01-05*01
CTACACACCCTGCAGCCAGAAGACTCGGCCCTGTATCTCTGCGCCAGCAGCCAAGGGCTAGCTAGGGAGACCCAGTACTTCGGGCCA	CASSQGLARETQYF	9	7.98148e-05	TCRBV04-03*01	TCRBD02-01	TCRBJ02-05*01
ATCCAGCGCACAGAGCAGGGGGACTCGGCCATGTATCTCTGTGCCAGCAGCTTCCAAGGGGCCAACTATGGCTACACCTTCGGTTCG	CASSFQGANYGYTF	9	7.98148e-05	TCRBV07-09	TCRBD01-01*01	TCRBJ01-02*01
GAGATCCAGCGCACAGAGCAGGGGGACTCGGCCATGTATCTCTGTGCCAGCAGCCCGGGAGTGGGGTCTGGCTACACCTTCGGTTCG	CASSPGVGSGYTF	9	7.98148e-05	TCRBV07-09	TCRBD02-01*02	TCRBJ01-02*01
AGTGCCCATCCTGAAGACAGCAGCTTCTACATCTGCAGTGCTAGCCCTCCCGGACATGGGAGCTCCTACGAGCAGTACTTCGGGCCG	CSASPPGHGSSYEQYF	9	7.98148e-05	TCRBV20	unknown	TCRBJ02-07*01
GACTCTCCAGACAAAGCTCATTTAAATCTTCACATCAATTCCCTGGAGCTTGGTGCCCAGGGAGGAAACACCATATATTTTGGAGAG	IYF	9	7.98148e-05	TCRBV03-02*01	TCRBD01-01*01	TCRBJ01-03*01
GTGACCAGTGCCCATCCTGAAGACAGCAGCTTCTACATCTGCAGTGCTAGAGTTTCTGGGGGCTTGTACGAGCAGTACTTCGGGCCG	CSARVSGGLYEQYF	9	7.98148e-05	TCRBV20	TCRBD01-01*01	TCRBJ02-07*01
ACGTTGGCGTCTGCTGTACCCTCTCAGACATCTGTGTACTTCTGTGCCAGCAGTATGACTAGCGAGGATACGCAGTATTTTGGCCCA	CASSMTSEDTQYF	9	7.98148e-05	TCRBV06-04	TCRBD02-01	TCRBJ02-03*01
ATCCGCTCACCAGGCCTGGGGGACGCAGCCATGTACCTGTGTGCCACCAGCAGAAGCAGGGAGGGCACTGAAGCTTTCTTTGGACAA	CATSRSREGTEAFF	9	7.98148e-05	TCRBV15-01*01	TCRBD02-01*02	TCRBJ01-01*01
ACTGTGAGCAACATGAGCCCTGAAGACAGCAGCATATATCTCTGCAGCGCCAGACTAGGAAGCTCCTACGAGCAGTACTTCGGGCCG	CSARLGSSYEQYF	9	7.98148e-05	TCRBV29-01*01	TCRBD02-01	TCRBJ02-07*01
ACCAGTGCCCATCCTGAAGACAGCAGCTTCTACATCTGCAGTGCCAGAGCAAGCTCGGGGGTCACAGATACGCAGTATTTTGGCCCA	CSARASSGVTDTQYF	9	7.98148e-05	TCRBV20	TCRBD02-01*01	TCRBJ02-03*01
GAGTCTGCTGCCTCCTCCCAGACATCTGTATATTTCTGCGCCAGCAGCGCAGATCATTTGAGCACAGATACGCAGTATTTTGGCCCA	CASSADHLSTDTQYF	9	7.98148e-05	TCRBV10-01	TCRBD01-01*01	TCRBJ02-03*01
ACCAACCAGACATCTATGTACCTCTGTGCCAGCAGTACAACCGAGGGGGCGCGGTTACCGTACCAAGAGACCCAGTACTTCGGGCCA	CASSTTEGARLPYQETQYF	9	7.98148e-05	TCRBV28-01*01	TCRBD01-01*01	TCRBJ02-05*01
CAGCCTGCAGAACTGGAGGATTCTGGAGTTTATTTCTGTGCCAGCAGCCAGTTAGGACAGACAAACACTGAAGCTTTCTTTGGACAA	CASSQLGQTNTEAFF	9	7.98148e-05	TCRBV14-01*01	TCRBD01-01*01	TCRBJ01-01*01
ACAGAGCAGGGGGACTCGGCCATGTATCTCTGTGCCAGCAGCTCACCTAAGAGGCAGGGAAGCACAGATACGCAGTATTTTGGCCCA	CASSSPKRQGSTDTQYF	9	7.98148e-05	TCRBV07-09	TCRBD01-01*01	TCRBJ02-03*01
CAGGAGGACTCGGCCGTGTATCTCTGTGCCAGCAGCTGGCGTGGGGTATGGTCTCGGGGCGGTAACGATGGCTACACCTTCGGTTCG	CASSWRGVWSRGGNDGYTF	9	7.98148e-05	TCRBV07-02*01	unknown	TCRBJ01-02*01
AGGCTGGAGTCGGCTGCTCCCTCCCAGACATCTGTGTACTTCTGTGCCAGCCTCCCAGGTGCTGGGGAGACCCAGTACTTCGGGCCA	CASLPGAGETQYF	9	7.98148e-05	TCRBV06-01*01	TCRBD01-01*01	TCRBJ02-05*01
TCCACAAAGCTGGAGGACTCAGCCATGTACTTCTGTGCCAGCAGAGATCGGACAGGGGCCCGGGGTGAAAAACTGTTTTTTGGCAGT	CASRDRTGARGEKLFF	9	7.98148e-05	TCRBV02-01*01	TCRBD01-01*01	TCRBJ01-04*01
CAGCGCACACAGCAGGAGGACTCGGCCGTGTATCTCTGTGCCAGCAGCTTAGTAGTCAGTGGTACCGGGGAGCTGTTTTTTGGAGAA	CASSLVVSGTGELFF	9	7.98148e-05	TCRBV07-02*01	unknown	TCRBJ02-02*01
TCTCTGGAGCTGGGGGACTCAGCTTTGTATTTCTGTGCCAGCAGCGTAGGGTCTCCCGGTGGGGGAAACACCATATATTTTGGAGAG	CASSVGSPGGGNTIYF	9	7.98148e-05	TCRBV09-01	unknown	TCRBJ01-03*01
TCTGCCATCCCCAACCAGACAGCTCTTTACTTCTGTGCCACCAGTCATATTGACAGCCGAGGGTACAATGAGCAGTTCTTCGGGCCA	CATSHIDSRGYNEQFF	9	7.98148e-05	TCRBV24	unknown	TCRBJ02-01*01
TCCCTGGAGCTTGGTGACTCTGCTGTGTATTTCTGTGCCAGCAGCCAAGATCGGGGGACAGGGTCAGATACGCAGTATTTTGGCCCA	CASSQDRGTGSDTQYF	9	7.98148e-05	TCRBV03	TCRBD01-01*01	TCRBJ02-03*01
AGGCTGGAGTTGGCTGCTCCCTCCCAGACATCTGTGTACTTCTGTGCCAGCAGCCCGGGATCAGGCGTTGAGCAGTTCTTCGGGCCA	CASSPGSGVEQFF	9	7.98148e-05	TCRBV06-06	TCRBD02-01*02	TCRBJ02-01*01
CAGCGCACAGAGCAGGGGGACTCAGCCGTGTATCTCCGTGCCAGCAGCTCCGCCCCTAGCTCTGGAAACACCATATATTTTGGAGAG	RASSSAPSSGNTIYF	9	7.98148e-05	TCRBV07-03*02	TCRBD02-01	TCRBJ01-03*01
TTGGAGCTGGACGACTCGGCCCTGTATCTCTGTGCCAGCAGCTTGGGACAGGGTTGGGACTATAATTCACCCCTCCACTTTGGGAAC	CASSLGQGWDYNSPLHF	9	7.98148e-05	TCRBV05-04*01	TCRBD01-01*01	TCRBJ01-06*01
AATGCCTTGGAGCTGGAGGACTCGGCCCTGTATCTCTGTGCCAGCAGCGGGGCAAAGGTTTTCGGTCTGCCCCAGCATTTTGGTGAT	CASSGAKVFGLPQHF	9	7.98148e-05	TCRBV05-08*01	TCRBD01-01*01	TCRBJ01-05*01
GTGAGCACCTTGGAGCTGGGGGACTCGGCCCTTTATCTTTGCGCCACCGGGACAGGGGGCGGCACAGATACGCAGTATTTTGGCCCA	CATGTGGGTDTQYF	9	7.98148e-05	TCRBV05-01*01	TCRBD01-01*01	TCRBJ02-03*01
CTGGAGTCAGCTACCCGCTCCCAGACATCTGTGTATTTCTGCGCCAGCAGTAGGGATCCCCTCACAGATACGCAGTATTTTGGCCCA	CASSRDPLTDTQYF	9	7.98148e-05	TCRBV10-02*01	unknown	TCRBJ02-03*01
GTGAGCACCTTGGAGCTGGGGGACTCGGCCCTTTATCTTTGCGCCAGCAGCTTGGGACAGAAAACAGATACGCAGTATTTTGGCCCA	CASSLGQKTDTQYF	9	7.98148e-05	TCRBV05-01*01	TCRBD01-01*01	TCRBJ02-03*01
GTGAGCACCTTGGAGCTGGGGGACTCGGCCCTTTATCTTTGCGCCAGCAGCTTGGTGGGGGAGCACACTGAAGCTTTCTTTGGACAA	CASSLVGEHTEAFF	9	7.98148e-05	TCRBV05-01*01	unknown	TCRBJ01-01*01
CTGGAGTCGCCCAGCCCCAACCAGACCTCTCTGTACTTCTGTGCCAGTTCCTTCACGAGGTCGGCCGGGGAGCTGTTTTTTGGAGAA	CASSFTRSAGELFF	9	7.98148e-05	TCRBV27-01*01	TCRBD02-01*02	TCRBJ02-02*01
GCCCAAAAGAACCCGACAGCTTTCTATCTCTGTGCCAGTAGCCCACCCCTCGACAGAAAAAGCAATCAGCCCCAGCATTTTGGTGAT	CASSPPLDRKSNQPQHF	9	7.98148e-05	TCRBV19-01	TCRBD01-01*01	TCRBJ01-05*01
CTGACAGTGACCAGTGCCCATCCTGAAGACAGCAGCTTCTACATCTGCAGTGCTAGAGATGCCCGCATACAAGCTTTCTTTGGACAA	CSARDARIQAFF	9	7.98148e-05	TCRBV20	unknown	TCRBJ01-01*01
TCCCTGGAGCTTGGTGACTCTGCTGTGTATTTCTGTGCCAGCAGCCCACCGGGACTTATTACTCATTCACCCCTCCACTTTGGGAAC	CASSPPGLITHSPLHF	9	7.98148e-05	TCRBV03	TCRBD02-01	TCRBJ01-06*01
GCCTTGTTGCTGGGGGACTCGGCCCTCTATCTCTGTGCCAGCAGCTTTTTCGTGGGGTCAACTAATGAAAAACTGTTTTTTGGCAGT	CASSFFVGSTNEKLFF	9	7.98148e-05	TCRBV05-06*01	unknown	TCRBJ01-04*01
AAGATCCAGCCCTCAGAACCCAGGGACTCAGCTGTGTACTTCTGTGCCAGCAGCCCCCGGGGGGGCTACGAGCAGTACTTCGGGCCG	CASSPRGGYEQYF	9	7.98148e-05	TCRBV12	TCRBD02-01*01	TCRBJ02-07*01
AATCTTCACATCAATTCCCTGGAGCTTGGTGACTCTGCTGTGTATTTCTGTGCCAGCAGCGGTGATGAGACCCAGTACTTCGGGCCA	CASSGDETQYF	9	7.98148e-05	TCRBV03	unknown	TCRBJ02-05*01
ACTCTGAAGGTGCAGCCTGCAGAACTGGAGGATTCTGGAGTTTATTTCTGTGCCAGCAGCCAGGACAATGAGCAGTTCTTCGGGCCA	CASSQDNEQFF	9	7.98148e-05	TCRBV14-01*01	unknown	TCRBJ02-01*01
TCTGCCATCCCCAACCAGACAGCTCTTTACTTCTGTGCCACCAGTGACAAACAGGGGGACGGTCAAGAGACCCAGTACTTCGGGCCA	CATSDKQGDGQETQYF	9	7.98148e-05	TCRBV24	TCRBD01-01*01	TCRBJ02-05*01
CGGTCCACAAAGCTGGAGGACTCAGCCATGTACTTCTGTGCCAGCAGCCGACTCAGGGAAGCTGGAAACACCATATATTTTGGAGAG	CASSRLREAGNTIYF	9	7.98148e-05	TCRBV02-01*01	TCRBD01-01*01	TCRBJ01-03*01
CTGGAGTCGGCTGCTCCCTCCCAGACATCTGTGTACTTCTGTGCCAGCAGTGAAGCGCTAGTAGTGGACGAGCAGTACTTCGGGCCG	CASSEALVVDEQYF	9	7.98148e-05	TCRBV06-01*01	TCRBD02-01	TCRBJ02-07*01
CTGATCCTGGAGTCGCCCAGCCCCAACCAGACCTCTCTGTACTTCTGTGCCAGCAGTTTATCAGGCCAGCCCCAGCATTTTGGTGAT	CASSLSGQPQHF	9	7.98148e-05	TCRBV27-01*01	unknown	TCRBJ01-05*01
ACCCTGCAGCCAGAAGACTCGGCCCTGTATCTCTGTGCCAGCAGCCAATCAGACAGGTTGATGGGCGGGGAGCTGTTTTTTGGAGAA	CASSQSDRLMGGELFF	9	7.98148e-05	TCRBV04-02*01	TCRBD01-01*01	TCRBJ02-02*01
CTGGAGTCGCCCAGCCCCAACCAGACCTCTCTGTACTTCTGTGCTTACTATGGGGGCACGGTAAATCAGCCCCAGCATTTTGGTGAT	CAYYGGTVNQPQHF	9	7.98148e-05	TCRBV27-01*01	TCRBD01-01*01	TCRBJ01-05*01
CACGCCCTGCAGCCAGAAGACTCAGCCCTGTATCTCTGCGCCAGCGGGGGCGAGGCCCTAGTAGCCGGGGAGCTGTTTTTTGGAGAA	CASGGEALVAGELFF	9	7.98148e-05	TCRBV04-01*01	TCRBD01-01*01	TCRBJ02-02*01
GTGAGCAACATGAGCCCTGAAGACAGCAGCATATATCTCTGCAGCGTTGAGGGCAAACAGGGCCACTATGGCTACACCTTCGGTTCG	CSVEGKQGHYGYTF	9	7.98148e-05	TCRBV29-01*01	TCRBD01-01*01	TCRBJ01-02*01
AATTCCCTGGAGCTTGGTGACTCTGCTGTGTATTTCTGTGCCAGCAGCCAAGAGGGTCATAGTAGCTACGAGCAGTACTTCGGGCCG	CASSQEGHSSYEQYF	9	7.98148e-05	TCRBV03	unknown	TCRBJ02-07*01
CTGACAGTGACCAGTGCCCATCCTGAAGACAGCAGCTTCTACATCTGCAGTGCTCAGACAGGAAATCAGCCCCAGCATTTTGGTGAT	CSAQTGNQPQHF	9	7.98148e-05	TCRBV20	TCRBD01-01*01	TCRBJ01-05*01
GCGTCTGCTGTACCCTCTCAGACATCTGTGTACTTCTGTGCCAGCAGTGACGGGACTAGCAGCACCGGGGAGCTGTTTTTTGGAGAA	CASSDGTSSTGELFF	9	7.98148e-05	TCRBV06-04	TCRBD02-01	TCRBJ02-02*01
CAGCGCACACAGCAGGAGGACTCCGCCGTGTATCTCTGTGCCAGCAGCTTAAGAGGGGACGGCACAGATACGCAGTATTTTGGCCCA	CASSLRGDGTDTQYF	9	7.98148e-05	TCRBV07-08*01	unknown	TCRBJ02-03*01
ACCAGTGCCCATCCTGAAGACAGCAGCTTCTACATCTGCAGTGCCACGCGGGGCGGGGGGAGTGACAATGAGCAGTTCTTCGGGCCA	CSATRGGGSDNEQFF	9	7.98148e-05	TCRBV20	TCRBD02-01*01	TCRBJ02-01*01
GAGTCGGCTGCTCCCTCCCAAACATCTGTGTACTTCTGTGCCAGCAGCTCACTAGCGGGGGCATGGGAGACCCAGTACTTCGGGCCA	CASSSLAGAWETQYF	9	7.98148e-05	TCRBV06	TCRBD02-01*01	TCRBJ02-05*01
ACTGTGACATCGGCCCAAAAGAACCCGACAGCTTTCTATCTCTGTGCCAGTAACCCGGACAGGACGTCACCCCTCCACTTTGGGAAC	CASNPDRTSPLHF	9	7.98148e-05	TCRBV19-01	TCRBD01-01*01	TCRBJ01-06*01
GAGTTGGCTGCTCCCTCCCAGACATCTGTGTACTTCTGTGCCAGCAGGGAGGACGGAGGCCGACGGAGCGAGCAGTACTTCGGGCCG	CASREDGGRRSEQYF	9	7.98148e-05	TCRBV06-06	TCRBD02-01*02	TCRBJ02-07*01
ACCTTGGAGATCCAGCGCACAGAGCAGGGGGACTCGGCCATGTATCTCTGTGCCAGCAGTTCAGGGTCCACCATATATTTTGGAGAG	CASSSGSTIYF	9	7.98148e-05	TCRBV07-09	TCRBD01-01*01	TCRBJ01-03*01
CTCAAGATCCAGCCTGCAAAGCTTGAGGACTCGGCCGTGTATCTCTGTGCCAGCAGCTTAGATAGAGCCGGCTACACCTTCGGTTCG	CASSLDRAGYTF	9	7.98148e-05	TCRBV11-02*02	TCRBD02-01	TCRBJ01-02*01
CTACACACCCTGCAGCCAGAAGACTCGGCCCTGTATCTCTGTGCCAGCAGCCAACGGACAGAGGGCTACGAGCAGTACTTCGGGCCG	CASSQRTEGYEQYF	9	7.98148e-05	TCRBV04-02*01	TCRBD01-01*01	TCRBJ02-07*01
GAGTCTGCCAGGCCCTCACATACCTCTCAGTACCTCTGTGCCAGCAGTGGGGGTGGGGCAACTAATGAAAAACTGTTTTTTGGCAGT	CASSGGGATNEKLFF	8	7.09465e-05	TCRBV25-01*01	unknown	TCRBJ01-04*01
AGGCTGCTGTCGGCTGCTCCCTCCCAGACATCTGTGTACTTCTGTGCCAGCAGTTCGCCCAGGGGGGAGACCCAGTACTTCGGGCCA	CASSSPRGETQYF	8	7.09465e-05	TCRBV06-05*01	TCRBD01-01*01	TCRBJ02-05*01
AAGATCCAGCCCTCAGAACCCAGGGACTCAGCTGTGTACTTCTGTGCCACACAGGGGAACTCTGGAAACACCATATATTTTGGAGAG	CATQGNSGNTIYF	8	7.09465e-05	TCRBV12	TCRBD01-01*01	TCRBJ01-03*01
AGCACCTTGGAGCTGGGGGACTCGGCCCTTTATCTTTGCGCCAGCAGCCGCGGTGGAGACCTTACCTCCGAGCAGTACTTCGGGCCG	CASSRGGDLTSEQYF	8	7.09465e-05	TCRBV05-01*01	TCRBD02-01	TCRBJ02-07*01
GTGACATCGGCCCAAAAGAACCCGACAGCTTTCTATCTCTGTGCCAGTACCCTCGCGGGATATAATTCACCCCTCCACTTTGGGAAC	CASTLAGYNSPLHF	8	7.09465e-05	TCRBV19-01	TCRBD02-01*02	TCRBJ01-06*01
CTGAGCTCTCTGGAGCTGGGGGACTCAGCTTTGTATTTCTGTGCCAGCAGCGTAGATGGGGCTAATCAGCCCCAGCATTTTGGTGAT	CASSVDGANQPQHF	8	7.09465e-05	TCRBV09-01	TCRBD01-01*01	TCRBJ01-05*01
CAGCCCTCAGAACCCAGGGACTCAGCTGTGTACTTCTGTGCCAGCAGTTTCGGGCAGGGGAACACCGGGGAGCTGTTTTTTGGAGAA	CASSFGQGNTGELFF	8	7.09465e-05	TCRBV12	TCRBD01-01*01	TCRBJ02-02*01
ACAGTGACCAGTGCCCATCCTGAAGACAGCAGCTTCTACATCTGCAGTGCGAGCCGGGGGAACACCGGGGAGCTGTTTTTTGGAGAA	CSASRGNTGELFF	8	7.09465e-05	TCRBV20	TCRBD02-01*01	TCRBJ02-02*01
CCCTCAGAACCCAGGGACTCAGCTGTGTACTTCTGTGCCAGCAGTTTTTTTCCAGGGGGGAACACCGGGGAGCTGTTTTTTGGAGAA	CASSFFPGGNTGELFF	8	7.09465e-05	TCRBV12	TCRBD01-01*01	TCRBJ02-02*01
TTGGAGATCCAGCGCACAGAGCAGGGGGACTCGGCCATGTATCTCTGTGCCAGCAGCTTAGATCGTCAGCCCCAGCATTTTGGTGAT	CASSLDRQPQHF	8	7.09465e-05	TCRBV07-09	TCRBD02-01	TCRBJ01-05*01
CAGCCCTCAGAACCCAGGGACTCAGCTGTGTACTTCTGTGCCAGCAGCTTAATAGCGGGGCGACCCTACGAGCAGTACTTCGGGCCG	CASSLIAGRPYEQYF	8	7.09465e-05	TCRBV12	TCRBD02-01*01	TCRBJ02-07*01
GTGACATCGGCCCAAAAGAACCCGACAGCTTTCTATCTCTGTGCCAGTAGTGGGGGATATAGCAATCAGCCCCAGCATTTTGGTGAT	CASSGGYSNQPQHF	8	7.09465e-05	TCRBV19-01	unknown	TCRBJ01-05*01
TTGTTGCTGGGGGACTCGGCCCTCTATCTCTGTGCCAGCAGCTTGTCCGCTCAGGGCCTGGGAAATCAGCCCCAGCATTTTGGTGAT	CASSLSAQGLGNQPQHF	8	7.09465e-05	TCRBV05-06*01	TCRBD01-01*01	TCRBJ01-05*01
CGGTCCACAAAGCTGGAGGACTCAGCCATGTACTTCTGTGCCAGCAGTGAACTGGAGAAGCCACGGGAAAAACTGTTTTTTGGCAGT	CASSELEKPREKLFF	8	7.09465e-05	TCRBV02-01*01	TCRBD02-01*02	TCRBJ01-04*01
CACGCCCTGCAGCCAGAAGACTCAGCCCTGTATCTCTGCGCCAGCAGCCAAGAAGTAACAGGAGACACTGAAGCTTTCTTTGGACAA	CASSQEVTGDTEAFF	8	7.09465e-05	TCRBV04-01*01	TCRBD01-01*01	TCRBJ01-01*01
GAGATGAATGTGAGCACCTTGGAGCTGGGGGACTCGGCCCTTTATCTTTGCGCCAGCAGACTGACAGATACGCAGTATTTTGGCCCA	CASRLTDTQYF	8	7.09465e-05	TCRBV05-01*01	TCRBD02-01	TCRBJ02-03*01
CAGCCTGCAAAGCTTGAGGACTCGGCCGTGTATCTCTGTGCCAGCAGACATAGGACAGCCGACGGCGGGGAGCTGTTTTTTGGAGAA	CASRHRTADGGELFF	8	7.09465e-05	TCRBV11-02*02	TCRBD01-01*01	TCRBJ02-02*01
AGCACCTTGGAGCTGGGGGACTCGGCCCTTTATCTTTGCGCCAGCAGCGTCGGTAGGGGGGACGGTGAAAAACTGTTTTTTGGCAGT	CASSVGRGDGEKLFF	8	7.09465e-05	TCRBV05-01*01	unknown	TCRBJ01-04*01
TCGGCTGCTCCCTCCCAAACATCTGTGTACTTCTGTGCCAGCAGCCTGGACAGGGGAAGGGGCAATCAGCCCCAGCATTTTGGTGAT	CASSLDRGRGNQPQHF	8	7.09465e-05	TCRBV06	TCRBD01-01*01	TCRBJ01-05*01
ATCCAGCGCACAGAGCGGGGGGACTCAGCCGTGTATCTCTGTGCCAGCAGCGCCCCAGGAGCCCAAGAGACCCAGTACTTCGGGCCA	CASSAPGAQETQYF	8	7.09465e-05	TCRBV07-03*01	unknown	TCRBJ02-05*01
CTCACTGTGACATCGGCCCAAAAGAACCCGACAGCTTTCTATCTCTGTGCCAGTAGTATTGAGGGCTACACCATATATTTTGGAGAG	CASSIEGYTIYF	8	7.09465e-05	TCRBV19-01	TCRBD02-01*02	TCRBJ01-03*01
ACAGAGCAGGGGGACTCGGCCATGTATCTCTGTGCCAGCAGCTTAGCGGCGGGGGGTACAAGCACAGATACGCAGTATTTTGGCCCA	CASSLAAGGTSTDTQYF	8	7.09465e-05	TCRBV07-09	TCRBD02-01*01	TCRBJ02-03*01
CGCACAGAGCAGCGGGACTCAGCCATGTATCGCTGTGCCAGCAGCGAGATAGCGGGGGGGCCAAGGGAGACCCAGTACTTCGGGCCA	CASSEIAGGPRETQYF	8	7.09465e-05	TCRBV07-07*01	TCRBD02-01*01	TCRBJ02-05*01
AATGTGAGCACCTTGGAGCTGGGGGACTCGGCCCTTTATCTTTGCGCCAGCAGTGAGGGCCCAGGGCAGCCCCAGCATTTTGGTGAT	CASSEGPGQPQHF	8	7.09465e-05	TCRBV05-01*01	unknown	TCRBJ01-05*01
GTGACATCGGCCCAAAAGAACCCGACAGCTTTCTATCTCTGTGCCAGTAGTGCAGTTCAGTCCCCAAGCATTCAGTACTTCGGCGCC	CASSAVQSPSIQYF	8	7.09465e-05	TCRBV19-01	TCRBD01-01*01	TCRBJ02-04*01
CTGAGGATCCAGCAGGTAGTGCGAGGAGATTCGGCAGCTTATTTCTGTGCCAGCTCACCCCTCGCTGGTGAAGCTTTCTTTGGACAA	CASSPLAGEAFF	8	7.09465e-05	TCRBV18-01*01	unknown	TCRBJ01-01*01
ATCCAGCAGGTAGTGCGAGGAGATTCGGCAGCTTATTTCTGTGCCAGCTCACCTCCAGGGCGGGATTTAGAGCAGTACTTCGGGCCG	CASSPPGRDLEQYF	8	7.09465e-05	TCRBV18-01*01	TCRBD02-01*02	TCRBJ02-07*01
TCCCTGGAGCTTGGTGACTCTGCTGTGTATTTCTGTGCCAGCAGCCCGAACTACCGGGGTTCCAATCAGCCCCAGCATTTTGGTGAT	CASSPNYRGSNQPQHF	8	7.09465e-05	TCRBV03	TCRBD02-01*01	TCRBJ01-05*01
ATCCGCTCACCAGGCCTGGGGGACGCAGCCATGTACCTGTGTGCCACCAGCGGGACTAGCACGTACAATGAGCAGTTCTTCGGGCCA	CATSGTSTYNEQFF	8	7.09465e-05	TCRBV15-01*01	TCRBD02-01	TCRBJ02-01*01
CACATCAATTCCCTGGAGCTTGGTGACTCTGCTGTGTATTTCTGTGCCAGCAGCCGGACTAACTCCTACGAGCAGTACTTCGGGCCG	CASSRTNSYEQYF	8	7.09465e-05	TCRBV03	TCRBD02-01	TCRBJ02-07*01
ATCCAGCCCTCAGAACCCAGGGACTCAGCTGTGTACTTCTGTGCCAGCAGTTTAGTAGCCTTAGTCAATGAGCAGTTCTTCGGGCCA	CASSLVALVNEQFF	8	7.09465e-05	TCRBV12	TCRBD02-01	TCRBJ02-01*01
CTGAAGATCCAGCCCTCAGAACCCAGGGACTCAGCTGTGTACTTCTGTGCCAGCAGTCGCGGGGCGGATACGCAGTATTTTGGCCCA	CASSRGADTQYF	8	7.09465e-05	TCRBV12	TCRBD02-01*01	TCRBJ02-03*01
GTGAACGCCTTGGAGCTGGACGACTCGGCCCTGTATCTCTGTGCCAGCAGCTTAGGGGGGGCAACCAATGAGCAGTTCTTCGGGCCA	CASSLGGATNEQFF	8	7.09465e-05	TCRBV05-04*01	TCRBD02-01*01	TCRBJ02-01*01
CTGAGCTCTCTGGAGCTGGGGGACTCAGCTTTGTATTTCTGTGCCAGCAGCGTAGGAGGTAGCGGCAATGAGCAGTTCTTCGGGCCA	CASSVGGSGNEQFF	8	7.09465e-05	TCRBV09-01	TCRBD02-01	TCRBJ02-01*01
CTGGAGTCGGCTGCTCCCTCCCAGACATCTGTGTACTTCTGTGCCAGCAGGATCGGGGGGGCTAATGAAAAACTGTTTTTTGGCAGT	CASRIGGANEKLFF	8	7.09465e-05	TCRBV06-01*01	TCRBD02-01*01	TCRBJ01-04*01
TCGCTCAGGCTGGAGTCGGCTGCTCCCTCCCAGACATCTGTGTACTTCTGTGCCGCGGGGTTCACCGGGGAGCTGTTTTTTGGAGAA	CAAGFTGELFF	8	7.09465e-05	TCRBV06-01*01	TCRBD02-01*01	TCRBJ02-02*01
TTCACTCTGAAGATCCGGTCCACAAAGCTGGAGGACTCAGCCATGTACTTCTGTGACACTAAGGGTCAGCCCCAGCATTTTGGTGAT	CDTKGQPQHF	8	7.09465e-05	TCRBV02-01*01	unknown	TCRBJ01-05*01
CAGCGCACAGAGCAGGGGGACTCGGCCATGTATCTCTGTGCCAGCAGCCTTACAGAATCCGGGGCCAACGTCCTGACTTTCGGGGCC	CASSLTESGANVLTF	8	7.09465e-05	TCRBV07-09	TCRBD01-01*01	TCRBJ02-06*01
CAGCAGGAGGACTCGGCCGTGTATCTCTGTGCCAGCAGCCCCCGCGCCGGGACAGGGGGCCTGAACTATGGCTACACCTTCGGTTCG	CASSPRAGTGGLNYGYTF	8	7.09465e-05	TCRBV07-02*01	TCRBD01-01*01	TCRBJ01-02*01
GTGAGCAACATGAGCCCTGAAGACAGCAGCATATATCTCTGCAGCGTTGGGACAGGGGTGATGGGCTATGGCTACACCTTCGGTTCG	CSVGTGVMGYGYTF	8	7.09465e-05	TCRBV29-01*01	TCRBD01-01*01	TCRBJ01-02*01
GTGAGCACCTTGGAGCTGGGGGACTCGGCCCTTTATCTTTGCGCCAGCAGCTCCAGCGAGCAGGGCTACGAGCAGTACTTCGGGCCG	CASSSSEQGYEQYF	8	7.09465e-05	TCRBV05-01*01	TCRBD01-01*01	TCRBJ02-07*01
AGCACCTTGGAGCTGGGGGACTCGGCCCTTTATCTTTGCGCCAGCAGCTTAACTTCGGCGATCACAGATACGCAGTATTTTGGCCCA	CASSLTSAITDTQYF	8	7.09465e-05	TCRBV05-01*01	unknown	TCRBJ02-03*01
AATGCCTTGGAGCTGGAGGACTCGGCCCTGTATCTCTGTGCCAGCAGCTACTCCCCGACAGGGGGCGTCGAGCAGTACTTCGGGCCG	CASSYSPTGGVEQYF	8	7.09465e-05	TCRBV05-08*01	TCRBD01-01*01	TCRBJ02-07*01
GCTGTACCCTCTCAGACATCTGTGTACTTCTGTGCCAGCAGTGACTACATTCGATGGGGCTTCGACTACGAGCAGTACTTCGGGCCG	CASSDYIRWGFDYEQYF	8	7.09465e-05	TCRBV06-04	TCRBD01-01*01	TCRBJ02-07*01
GAGTCCGCTACCAGCTCCCAGACATCTGTGTACTTCTGTGCCATCAGTGACGCAGGGGTTAACTCCTACGAGCAGTACTTCGGGCCG	CAISDAGVNSYEQYF	8	7.09465e-05	TCRBV10-03*01	TCRBD01-01*01	TCRBJ02-07*01
CGCACACAGCAGGAGGACTCGGCCGTGTATCTCTGTGCCAGCAGCTTAGCTTCTAGCCTCAACACAGATACGCAGTATTTTGGCCCA	CASSLASSLNTDTQYF	8	7.09465e-05	TCRBV07-02*01	TCRBD02-01	TCRBJ02-03*01
AGCTCTCTGGAGCTGGGGGACTCAGCTTTGTATTTCTGTGCCAGCAGCGTAGAAATCGGGACAGGGGCAAAACTGTTTTTTGGCAGT	CASSVEIGTGAKLFF	8	7.09465e-05	TCRBV09-01	TCRBD01-01*01	TCRBJ01-04*01
GCGTCTGCTGTACCCTCTCAGACATCTGTGTACTTCTGTGCCAGCAGTGAGGGGCAGGGGGAATGGAGTGGCTACACCTTCGGTTCG	CASSEGQGEWSGYTF	8	7.09465e-05	TCRBV06-04	TCRBD01-01*01	TCRBJ01-02*01
TCAGAACCCAGGGACTCAGCTGTGTACTTCTGTGCCAGCAGCGCGGCTAGCGGGGGGGCCGGGAGGAACATTCAGTACTTCGGCGCC	CASSAASGGAGRNIQYF	8	7.09465e-05	TCRBV12	TCRBD02-01*01	TCRBJ02-04*01
CTTGACATCCGCTCACCAGGCCTGGGGGACGCAGCCATGTACCTGTGTGCCACCAGCAGAGATCAGGGGGTGGCTTTCTTTGGACAA	CATSRDQGVAFF	8	7.09465e-05	TCRBV15-01*01	TCRBD01-01*01	TCRBJ01-01*01
GACATCCGCTCACCAGGCCTGGGGGACGCAGCCATGTACCTGTGTGCCACCGCGATGGGGGAGCACACTGAAGCTTTCTTTGGACAA	CATAMGEHTEAFF	8	7.09465e-05	TCRBV15-01*01	unknown	TCRBJ01-01*01
ATCCGGTCCACAAAGCTGGAGGACTCAGCCATGTACTTCTGTGCCAGCAGTGATGAACAGAGGTCCTACGAGCAGTACTTCGGGCCG	CASSDEQRSYEQYF	8	7.09465e-05	TCRBV02-01*01	unknown	TCRBJ02-07*01
ATCCAGCCCTCAGAACCCAGGGACTCAGCTGTGTACTTCTGTGCCAGCAGTTTAGGCGCAGGGATTTCGCCCCAGCATTTTGGTGAT	CASSLGAGISPQHF	8	7.09465e-05	TCRBV12	TCRBD01-01*01	TCRBJ01-05*01
ATCAATTCCCTGGAGCTTGGTGACTCTGCTGTGTATTTCTGTGCCAGCAGCCAATACAGGGAGGAAACTGAAGCTTTCTTTGGACAA	CASSQYREETEAFF	8	7.09465e-05	TCRBV03	unknown	TCRBJ01-01*01
GCCTTGTTGCTGGGGGACTCGGCCCTGTATCTCTGTGCCAGCAGCTCAGGACTAGCGGGGCCTACAGATACGCAGTATTTTGGCCCA	CASSSGLAGPTDTQYF	8	7.09465e-05	TCRBV05-05*01	TCRBD02-01*01	TCRBJ02-03*01
CACATCAATTCCCTGGAGCTTGGTGACTCTGCTGTGTATTTCTGTGCCAGCAGTCGGACAGGGGGCACTGAAGCTTTCTTTGGACAA	CASSRTGGTEAFF	8	7.09465e-05	TCRBV03	TCRBD01-01*01	TCRBJ01-01*01
TCGGCTGCTCCCTCCCAGACATCTGTGTACTTCTGTGCCAGCAGTGAATACAGGGGTGTATCCTACAATGAGCAGTTCTTCGGGCCA	CASSEYRGVSYNEQFF	8	7.09465e-05	TCRBV06-01*01	TCRBD01-01*01	TCRBJ02-01*01
ACAGTGACCAGTGCCCATCCTGAAGACAGCAGCTTCTACATCTGCAGTGCTAGAGATTTGCGGGGATACGAGCAGTACTTCGGGCCG	CSARDLRGYEQYF	8	7.09465e-05	TCRBV20	TCRBD02-01*01	TCRBJ02-07*01
CAGCGCACACAGCAGGAGGACTCGGCCGTGTATCTCTGTGCCAGCAGCCCGAGGACAGCGACGGGCGGGGAGCTGTTTTTTGGAGAA	CASSPRTATGGELFF	8	7.09465e-05	TCRBV07-02*01	TCRBD01-01*01	TCRBJ02-02*01
ACGTTGGCGTCTGCTGTACCCTCTCAGACATCTGTGTACTTCTGTGCCAGCAGTCGACTTATGAACACTGAAGCTTTCTTTGGACAA	CASSRLMNTEAFF	8	7.09465e-05	TCRBV06-04	TCRBD02-01	TCRBJ01-01*01
CAGCGCACACAGCAGGAGGACTCGGCCGTGTATCTCTGTGCCAGCAGCACAACCGGGAGCGTGAAGGATACGCAGTATTTTGGCCCA	CASSTTGSVKDTQYF	8	7.09465e-05	TCRBV07-02*01	TCRBD02-01*02	TCRBJ02-03*01
GAGCTGGGGGACTCGGCCCTTTATCTTTGCGCCAGCAGCAACCCCCCTTTAGCGCAAAGCTCCTACAATGAGCAGTTCTTCGGGCCA	CASSNPPLAQSSYNEQFF	8	7.09465e-05	TCRBV05-01*01	TCRBD02-01	TCRBJ02-01*01
AGCTCCTTGGAGCTGGGGGACTCAGCCCTGTACTTCTGTGCCAGCAGCTTAGAGACAGGGATAAATTCACCCCTCCACTTTGGGAAC	CASSLETGINSPLHF	8	7.09465e-05	TCRBV13-01*01	TCRBD01-01*01	TCRBJ01-06*01
TTGGCTGCTCCCTCCCAGACATCTGTGTACTTCTGTGCCAGCAGTTACCGTATACTCCAGAAGCCCGGGGAGCTGTTTTTTGGAGAA	CASSYRILQKPGELFF	8	7.09465e-05	TCRBV06-06	unknown	TCRBJ02-02*01
AACCTGAGCTCTCTGGAGCTGGGGGACTCAGCTTTGTATTTCTGTGCCAGCAGCGAGTCCAGGGTGGGGGAGCAGTACTTCGGGCCG	CASSESRVGEQYF	8	7.09465e-05	TCRBV09-01	TCRBD01-01*01	TCRBJ02-07*01
ATCCGGTCCACAAAGCTGGAGGACTCAGCCATGTACTTCTGTGCCAGCCTGCGGGGAACAGGGAACACTGAAGCTTTCTTTGGACAA	CASLRGTGNTEAFF	8	7.09465e-05	TCRBV02-01*01	TCRBD02-01*01	TCRBJ01-01*01
CTGACAGTGACCAGTGCCCATCCTGAAGACAGCAGCTTCTACATCTGCAGTGCTACCGCAGGGGGAAACACCATATATTTTGGAGAG	CSATAGGNTIYF	8	7.09465e-05	TCRBV20	TCRBD01-01*01	TCRBJ01-03*01
AGCTCTCTGGAGCTGGGGGACTCAGCTTTGTATTTCTGTGCCAGCAGCGTAGGTTCTACCTACACAGATACGCAGTATTTTGGCCCA	CASSVGSTYTDTQYF	8	7.09465e-05	TCRBV09-01	TCRBD02-01	TCRBJ02-03*01
GTGACCAGTGCCCATCCTGAAGACAGCAGCTTCTACATCTGCAGTGCTAGAGATGGACAGGGGAAGGGCGAGCAGTACTTCGGGCCG	CSARDGQGKGEQYF	8	7.09465e-05	TCRBV20	TCRBD01-01*01	TCRBJ02-07*01
CAGCCTGCAAAGCTTGAGGACTCGGCCGTGTATCTCTGTGCCAGCAGCGCTCCCGGTGGCGAGGCGGAAGGCTACACCTTCGGTTCG	CASSAPGGEAEGYTF	8	7.09465e-05	TCRBV11-02*02	TCRBD02-01	TCRBJ01-02*01
TCCACAAAGCTGGAGGACTCAGCCATGTACTTCTGTGCCAGCAGTCTCAACAGGGGAGCAGCAGGAAACACCATATATTTTGGAGAG	CASSLNRGAAGNTIYF	8	7.09465e-05	TCRBV02-01*01	TCRBD01-01*01	TCRBJ01-03*01
AGTGCCCATCCTGAAGACAGCAGCTTCTACATCTGCAGTGCTAGCAGACTAGCGGGGGCTAGGAAAGAGACCCAGTACTTCGGGCCA	CSASRLAGARKETQYF	8	7.09465e-05	TCRBV20	TCRBD02-01*01	TCRBJ02-05*01
TCGGCCCAAAAGAACCCGACAGCTTTCTATCTCTGTGCCAGTAGTATAGTTGCGGGACAGGGGTATCAGCCCCAGCATTTTGGTGAT	CASSIVAGQGYQPQHF	8	7.09465e-05	TCRBV19-01	TCRBD01-01*01	TCRBJ01-05*01
TCCCTGGAGCTTGGTGACTCTGCTGTGTATTTCTGTGCCAGCAGCCATTGGGACAGGAGTACTGGAAACACCATATATTTTGGAGAG	CASSHWDRSTGNTIYF	8	7.09465e-05	TCRBV03	TCRBD01-01*01	TCRBJ01-03*01
CAGCGCACAGAGCAGGGGGACTCGGCCATGTATCTCTGTGCCAGCAGCTTAGCCGGGGACAGGGTGGGAGGCTACACCTTCGGTTCG	CASSLAGDRVGGYTF	8	7.09465e-05	TCRBV07-09	TCRBD01-01*01	TCRBJ01-02*01
ACGGAGTCAGGGGACACAGCACTGTATTTCTGTGCCAGCAGCCCCCGACTAGCGGGGCGGCCAGTCGATGAGCAGTTCTTCGGGCCA	CASSPRLAGRPVDEQFF	8	7.09465e-05	TCRBV21-01*01	TCRBD02-01*01	TCRBJ02-01*01
CCTGCAAAGCTTGAGGACTCGGCCGTGTATCTCTGTGCCAGCAGCCCGTGGGGGACAGGGAACCAAGAGACCCAGTACTTCGGGCCA	CASSPWGTGNQETQYF	8	7.09465e-05	TCRBV11-02*02	TCRBD01-01*01	TCRBJ02-05*01
CTGGAGTCCGCTACCAGCTCCCAGACATCTGTGTACTTCTGTGCCATCAGTGAGGCCGGAAGAGCCTATGGCTACACCTTCGGTTCG	CAISEAGRAYGYTF	8	7.09465e-05	TCRBV10-03*01	unknown	TCRBJ01-02*01
CTGCTGTCGGCTGCTCCCTCCCAGACATCTGTGTACTTCTGTGCCAGCAGTCGCAGGGGCACCCAAGAGACCCAGTACTTCGGGCCA	CASSRRGTQETQYF	8	7.09465e-05	TCRBV06-05*01	TCRBD01-01*01	TCRBJ02-05*01
AAGATCCAGCCTGCAAAGCTTGAGGACTCGGCCGTGTATCTCTGTGCCAGCAGCTTAGGGGGCCGCACTGAAGCTTTCTTTGGACAA	CASSLGGRTEAFF	8	7.09465e-05	TCRBV11-02*02	TCRBD01-01*01	TCRBJ01-01*01
ATCCAGCGCACAGAGCAGGGGGACTCGGCCATGTATCTCTGTGCCAGCAGCCCAACAGGAGTCAATTCACCCCTCCACTTTGGGAAC	CASSPTGVNSPLHF	8	7.09465e-05	TCRBV07-09	TCRBD01-01*01	TCRBJ01-06*01
GCCCTGCAGCCAGAAGACTCAGCCCTGTATCTCTGCGCCAGCAGCCAAGCAACAGGGACCTCCTACAATGAGCAGTTCTTCGGGCCA	CASSQATGTSYNEQFF	8	7.09465e-05	TCRBV04-01*01	TCRBD01-01*01	TCRBJ02-01*01
CAGCGCACAGAGCGGGGGGACTCAGCCGTGTATCTCTGTGCCAGCAGCCCTCAGGGGGGAACCTACAATGAGCAGTTCTTCGGGCCA	CASSPQGGTYNEQFF	8	7.09465e-05	TCRBV07-03*01	TCRBD01-01*01	TCRBJ02-01*01
CTTCACCTACACACCCTGCAGCCAGAAGACTCGGCCCTGTATCTCTGTGCCAGCAGCCAAGAGGCAGGGAGGCTGTTTTTTGGCAGT	CASSQEAGRLFF	8	7.09465e-05	TCRBV04-02*01	TCRBD02-01*02	TCRBJ01-04*01
ACCAGTGCCCATCCTGAAGACAGCAGCTTCTACATCTGCAGTGCTAGGGCCACGGGACCCGAATACAATGAGCAGTTCTTCGGGCCA	CSARATGPEYNEQFF	8	7.09465e-05	TCRBV20	unknown	TCRBJ02-01*01
AGCTCTCTGGAGCTGGGGGACTCAGCTTTGTATTTCTGTGCCAGCAGCGTAGGTTCACTCAGCACAGATACGCAGTATTTTGGCCCA	CASSVGSLSTDTQYF	8	7.09465e-05	TCRBV09-01	TCRBD02-01	TCRBJ02-03*01
CTAAACCTGAGCTCTCTGGAGCTGGGGGACTCAGCTTTGTATTTCTGTGCCAGCAGCGTAGAAGGGGGTAGTCAGTACTTCGGCGCC	CASSVEGGSQYF	8	7.09465e-05	TCRBV09-01	TCRBD01-01*01	TCRBJ02-04*01
TCTCTGGAGCTGGGGGACTCAGCTTTGTATTTCTGTGCCAGCAGCAGACAACAGGGTTTAGTAAACACTGAAGCTTTCTTTGGACAA	CASSRQQGLVNTEAFF	8	7.09465e-05	TCRBV09-01	TCRBD01-01*01	TCRBJ01-01*01
CGCTCACCAGGCCTGGGGGACGCAGCCATGTACCTGTGTGCCACCAGCAGAGATCCAGGGGGCAATCAGCCCCAGCATTTTGGTGAT	CATSRDPGGNQPQHF	8	7.09465e-05	TCRBV15-01*01	TCRBD01-01*01	TCRBJ01-05*01
ACCTTGGAGCTGGGGGACTCGGCCCTTTATCTTTGCGCCAGCAGCTTGGGGGGAACAGGAGGCAATCAGCCCCAGCATTTTGGTGAT	CASSLGGTGGNQPQHF	8	7.09465e-05	TCRBV05-01*01	TCRBD01-01*01	TCRBJ01-05*01
AATTCCCTGGAGCTTGGTGACTCTGCTGTGTATTTCTGTGCCAGCAGCCCTGACAGGGCTGCCGGAAACACCATATATTTTGGAGAG	CASSPDRAAGNTIYF	8	7.09465e-05	TCRBV03	TCRBD01-01*01	TCRBJ01-03*01
AATGTGAACGCCTTGGAGCTGGACGACTCGGCCCTGTATCTCTGTGCCAGCAGCTTGGGGGCCTCCTACGAGCAGTACTTCGGGCCG	CASSLGASYEQYF	8	7.09465e-05	TCRBV05-04*01	TCRBD01-01*01	TCRBJ02-07*01
ACAGAGCAGCGGGACTCGGCCATGTATCGCTGTGCCAGCAGCTTAGGGACAGGGGCCTTCAGCAATCAGCCCCAGCATTTTGGTGAT	CASSLGTGAFSNQPQHF	8	7.09465e-05	TCRBV07-06*01	TCRBD01-01*01	TCRBJ01-05*01
CTCACTCTGGAGTCCGCTACCAGCTCCCAGACATCTGTGTACTTCTGTGCCATCAGCCGGACAGACTACGAGCAGTACTTCGGGCCG	CAISRTDYEQYF	8	7.09465e-05	TCRBV10-03*01	TCRBD01-01*01	TCRBJ02-07*01
CAGCGCACAGAGCGGGGGGACTCAGCCGTGTATCTCTGTGCCAGCAGCTTAACGGGGGATTACACAGATACGCAGTATTTTGGCCCA	CASSLTGDYTDTQYF	8	7.09465e-05	TCRBV07-03*01	unknown	TCRBJ02-03*01
GCCCTGCAGCCAGAAGACTCAGCCCTGTATCTCTGCGCCAGCAGCCAAGGACAGTCCTCTGGGGCCAACGTCCTGACTTTCGGGGCC	CASSQGQSSGANVLTF	8	7.09465e-05	TCRBV04-01*01	TCRBD01-01*01	TCRBJ02-06*01
CTGAGCTCTCTGGAGCTGGGGGACTCAGCTTTGTATTTCTGTGCCAGCAGCGTAATTGGGGGCACAGATACGCAGTATTTTGGCCCA	CASSVIGGTDTQYF	8	7.09465e-05	TCRBV09-01	unknown	TCRBJ02-03*01
ACTCTGACAGTGACCAGTGCCCATCCTGAAGACAGCAGCTTCTACATCTGCAGTGCTAGTAGTAAGAGGGAGCTGTTTTTTGGAGAA	CSASSKRELFF	8	7.09465e-05	TCRBV20-01*01	TCRBD02-01	TCRBJ02-02*01
CTTCACATCAATTCCCTGGAGCTTGGTGACTCTGCTGTGTATTTCTGTGCCAGCAGCCTTATGAACACTGAAGCTTTCTTTGGACAA	CASSLMNTEAFF	8	7.09465e-05	TCRBV03	TCRBD02-01	TCRBJ01-01*01
CTGGAGTCTGCCAGGCCCTCACATACCTCTCAGTACCTCTGTGCCAGCAGTGAACATCCGGGAGCGGGGGAGCAGTACTTTGGGCCG	CASSEHPGAGEQYF	8	7.09465e-05	TCRBV25-01*01	TCRBD02-01*01	TCRBJ02-07*01
CACCTACACGCCCTGCAGCCAGAAGACTCAGCCCTGTATCTCTGCGCCAGCAGCCGGGGAGGTCGGAACGAAGCTTTCTTTGGACAA	CASSRGGRNEAFF	8	7.09465e-05	TCRBV04-01*01	TCRBD02-01*02	TCRBJ01-01*01
ACTGTGACATCGGCCCAAAAGAACCCGACAGCTTTCTATCTCTGTGCCAGTAGTTCTAAAGGGGACACTGAAGCTTTCTTTGGACAA	CASSSKGDTEAFF	8	7.09465e-05	TCRBV19-01	TCRBD01-01*01	TCRBJ01-01*01
CTGAGGATCCAGCAGGTAGTGCGAGGAGATTCGGCAGCTTATTTCTGTGCCAGCTCACCGAGGGCCGACGAGCAGTACTTCGGGCCG	CASSPRADEQYF	8	7.09465e-05	TCRBV18-01*01	TCRBD02-01*02	TCRBJ02-07*01
CTTCACATCAATTCCCTGGAGCTTGGTGACTCTGCTGTGTATTTCTGTGCCAGCAGCCGGCCACCGGGCGAGCAGTACTTCGGGCCG	CASSRPPGEQYF	8	7.09465e-05	TCRBV03	TCRBD02-01	TCRBJ02-07*01
ACTGTGACATCGGCCCAAAAGAACCCGACAGCTTTCTATCTCTGTGCCACCCAGGTTATGCGGGGTCAGCCCCAGCATTTTGGTGAT	CATQVMRGQPQHF	8	7.09465e-05	TCRBV19-01	TCRBD02-01*01	TCRBJ01-05*01
TCCCTGGAGCTTGGTGACTCTGCTGTGTATTTCTGTGCCAGCAGCCGTACTAGCGGGGGGGCCACCGGGGAGCTGTTTTTTGGAGAA	CASSRTSGGATGELFF	8	7.09465e-05	TCRBV03	TCRBD02-01*01	TCRBJ02-02*01
CTGAAGATCCAGCCCTCAGAACCCAGGGACTCAGCTGTGTACTTCTGTGCCAGCAGGATGGGTAGTCAGCCCCAGCATTTTGGTGAT	CASRMGSQPQHF	8	7.09465e-05	TCRBV12	unknown	TCRBJ01-05*01
AGCTCCTTGGAGCTGGGGGACTCAGCCCTGTACTTCTGTGCCAGCGGGTTTAGGATGGCCGGGGCCAACGTCCTGACTTTCGGGGCC	CASGFRMAGANVLTF	8	7.09465e-05	TCRBV13-01*01	unknown	TCRBJ02-06*01
CTGAGCTCTCTGGAGCTGGGGGACTCAGCTTTGTATTTCTGTGCCAGCAGCTCCGGACAGATGAACACTGAAGCTTTCTTTGGACAA	CASSSGQMNTEAFF	8	7.09465e-05	TCRBV09-01	TCRBD01-01*01	TCRBJ01-01*01
CACGCCCTGCAGCCAGAAGACTCAGCCCTGTATCTCTGCGCCAGCAGCCAAGATGCAGGGTACACCGGGGAGCTGTTTTTTGGAGAA	CASSQDAGYTGELFF	8	7.09465e-05	TCRBV04-01*01	TCRBD01-01*01	TCRBJ02-02*01
TCGGCTGCTCCCTCCCAGACATCTGTGTACTTCTGTGCCAGCAGCTCGACGCGCGGGAGGGGATCCACTGAAGCTTTCTTTGGACAA	CASSSTRGRGSTEAFF	8	7.09465e-05	TCRBV06	TCRBD02-01*02	TCRBJ01-01*01
CTGAAGGTGCAGCCTGCAGAACTGGAGGATTCTGGAGTTTATTTCTGTGCCAGCAGGGGACTCAACTATGGCTACACCTTCGGTTCG	CASRGLNYGYTF	8	7.09465e-05	TCRBV14-01*01	TCRBD02-01	TCRBJ01-02*01
ATGAGCTCCTTGGAGCTGGGGGACTCAGCCCTGTACTTCTGTGCCAGCAGTCCTGACAGTAGTTCCTACGAGCAGTACTTCGGGCCG	CASSPDSSSYEQYF	8	7.09465e-05	TCRBV13-01*01	TCRBD01-01*01	TCRBJ02-07*01
CAGCCCTCAGAACCCAGGGACTCAGCTGTGTACTTCTGTGCCAGCAGTCCCTCCTCAGGGAGGGCAGAGACCCAGTACTTCGGGCCA	CASSPSSGRAETQYF	8	7.09465e-05	TCRBV12	TCRBD02-01*02	TCRBJ02-05*01
GCCTTGTTGCTGGGGGACTCGGCCCTCTATCTCTGTGCCAGCAGCACACTCTCGGGACAGGAGACTTCACCCCTCCACTTTGGGAAC	CASSTLSGQETSPLHF	8	7.09465e-05	TCRBV05-06*01	TCRBD01-01*01	TCRBJ01-06*01
GTGAGCACCTTGGAGCTGGGGGACTCGGCCCTTTATCTTTGCGCCAGCAGCTCAGGACGATTTGACGATGAGCAGTTCTTCGGGCCA	CASSSGRFDDEQFF	8	7.09465e-05	TCRBV05-01*01	unknown	TCRBJ02-01*01
GTGACCAGTGCCCATCCTGAAGACAGCAGCTTCTACATCTGCAGTGCTGGTCTCCGGGGGGGGTCGGAGACCCAGTACTTCGGGCCA	CSAGLRGGSETQYF	8	7.09465e-05	TCRBV20	TCRBD02-01*01	TCRBJ02-05*01
TCGGCTGCTCCCTCCCAGACATCTGTGTACTTCTGTGCCAGCAGTGGGGACGGTCTGAGCTCTGGAAACACCATATATTTTGGAGAG	CASSGDGLSSGNTIYF	8	7.09465e-05	TCRBV06-01*01	unknown	TCRBJ01-03*01
ACCTTGGAGCTGGGGGACTCGGCCCTTTATCTTTGCGCCAGCAGCTCTGGATGGACGGCTCTGAACACTGAAGCTTTCTTTGGACAA	CASSSGWTALNTEAFF	8	7.09465e-05	TCRBV05-01*01	unknown	TCRBJ01-01*01
CAGGTAGTGCGAGGAGATTCGGCAGCTTATTTCTGTGCCAGCTCACCACCGGGAGCGGGGGGGCAAGATACGCAGTATTTTGGCCCA	CASSPPGAGGQDTQYF	8	7.09465e-05	TCRBV18-01*01	TCRBD02-01*01	TCRBJ02-03*01
GAGCTGAATGTGAACGCCTTGTTGCTGGGGGACTCGGCCCTGTATCTCTGTGCCAGCAACGTGGCCGGGGAGCTGTTTTTTGGAGAA	CASNVAGELFF	8	7.09465e-05	TCRBV05-05*01	unknown	TCRBJ02-02*01
ACCAGTGCCCATCCTGAAGACAGCAGCTTCTACATCTGCAGTGCTAGCGGGCGACACCTGGGGGCCACTGAAGCTTTCTTTGGACAA	CSASGRHLGATEAFF	8	7.09465e-05	TCRBV20	TCRBD01-01*01	TCRBJ01-01*01
GTGAGCAACATGAGCCCTGAAGACAGCAGCATATATCTCTGCAGCGTTGAAGAGAAGGGCGTCCGCTATGGCTACACCTTCGGTTCG	CSVEEKGVRYGYTF	8	7.09465e-05	TCRBV29-01*01	unknown	TCRBJ01-02*01
CCCCTCACTCTGGAGTCTGCTGCCTCCTCCCAGACATCTGTATATTTCTGCGCCAGCAGTGCGGGGGAGACCCAGTACTTCGGGCCA	CASSAGETQYF	8	7.09465e-05	TCRBV10-01	TCRBD02-01*01	TCRBJ02-05*01
AGCACCTTGGAGCTGGGGGACTCGGCCCTTTATCTTTGCGCCAGCAGCTTAACGGTAAACGCGAACACTGAAGCTTTCTTTGGACAA	CASSLTVNANTEAFF	8	7.09465e-05	TCRBV05-01*01	TCRBD02-01	TCRBJ01-01*01
AGCTCTCTGGAGCTGGGGGACTCAGCTTTGTATTTCTGTGCCAGCAGCGTAACCACAGGGACAAATGAAAAACTGTTTTTTGGCAGT	CASSVTTGTNEKLFF	8	7.09465e-05	TCRBV09-01	TCRBD01-01*01	TCRBJ01-04*01
CGCACAGAGCAGCGGGACTCAGCCATGTATCGCTGTGCCAGCAGCCCGGGGGGGGCGAAGAGGGGCAATGAGCAGTTCTTCGGGCCA	CASSPGGAKRGNEQFF	8	7.09465e-05	TCRBV07-07*01	TCRBD02-01*01	TCRBJ02-01*01
TCTGCTGTACCCTCTCAGACATCTGTGTACTTCTGTGCCAGCCTCCTTACTCCCGGGACTGAGAACACTGAAGCTTTCTTTGGACAA	CASLLTPGTENTEAFF	8	7.09465e-05	TCRBV06-04	TCRBD02-01	TCRBJ01-01*01
GTGACATCGGCCCAAAAGAACCCGACAGCTTTCTATCTCTGTGCCAGTAGTATGGGAGGGGGGAATTCACCCCTCCACTTTGGGAAC	CASSMGGGNSPLHF	8	7.09465e-05	TCRBV19-01	TCRBD02-01*02	TCRBJ01-06*01
AAGATCCAGCCCTCAGAACCCAGGGACTCAGCTGTGTACTTCTGTGCCAGCAGAGGATCGGGGAATTCACCCCTCCACTTTGGGAAC	CASRGSGNSPLHF	8	7.09465e-05	TCRBV12	TCRBD02-01*01	TCRBJ01-06*01
GACATCCGCTCACCAGGCCTGGGGGACGCAGCCATGTACCTGTGTGCCACCAGCAGAGATAAGCAGGAGACCCAGTACTTCGGGCCA	CATSRDKQETQYF	8	7.09465e-05	TCRBV15-01*01	unknown	TCRBJ02-05*01
CAGCCTGCAAAGCTTGAGGACTCGGCCGTGTATCTCTGTGCCAGCAGCTTGCGACAGGGGGCAACAGATACGCAGTATTTTGGCCCA	CASSLRQGATDTQYF	8	7.09465e-05	TCRBV11-02*02	TCRBD01-01*01	TCRBJ02-03*01
TCCCTGGAGCTTGGTGACTCTGCTGTGTATTTCTGTGCCAGCAGCCAAAATAGGCAGGGACGAAGCGGGGAGCTGTTTTTTGGAGAA	CASSQNRQGRSGELFF	8	7.09465e-05	TCRBV03	unknown	TCRBJ02-02*01
CTGACTGTGAGCAACATGAGCCCTGAAGACAGCAGCATATATCTCTGCAGCGTTGATCTACAGCAGAACGAGCAGTACTTCGGGCCG	CSVDLQQNEQYF	8	7.09465e-05	TCRBV29-01*01	TCRBD01-01*01	TCRBJ02-07*01
AGCTCTCTGGAGCTGGGGGACTCAGCTTTGTATTTCTGTGCCAGCAGCGTAGAGGGCGGAATAAATTCACCCCTCCACTTTGGGAAC	CASSVEGGINSPLHF	8	7.09465e-05	TCRBV09-01	unknown	TCRBJ01-06*01
ATCCAGCGCACAGAGCGGGGGGACTCAGCCGTGTATCTCTGTGCCAGCAGCCCTGACCCCGGGACAGGGAATGCTTTCTTTGGACAA	CASSPDPGTGNAFF	8	7.09465e-05	TCRBV07-03*01	TCRBD01-01*01	TCRBJ01-01*01
AGCAACATGAGCCCTGAAGACAGCAGCATATATCTCTGCAGCGTTCTAGTTACATTCGGCCTTTCCGGGGAGCTGTTTTTTGGAGAA	CSVLVTFGLSGELFF	8	7.09465e-05	TCRBV29-01*01	TCRBD02-01	TCRBJ02-02*01
TTGCTGGGGGACTCGGCCCTCTATCTCTGTGCCAGCAGCCACCCCAAAGGGACAGGGAGGAACTCCTACGAGCAGTACTTCGGGCCG	CASSHPKGTGRNSYEQYF	8	7.09465e-05	TCRBV05-06*01	TCRBD01-01*01	TCRBJ02-07*01
ATCCAGCCCTCAGAACCCAGGGACTCAGCTGTGTACTTCTGTGCCAGCAGTGTCCCGGGTTCCCAAGAGACCCAGTACTTCGGGCCA	CASSVPGSQETQYF	8	7.09465e-05	TCRBV12	TCRBD02-01	TCRBJ02-05*01
ATCAATTCCCTGGAGCTTGGTGACTCTGCTGTGTATTTCTGTGCCAGCAGCTCACAGGGTACCAATTCACCCCTCCACTTTGGGAAC	CASSSQGTNSPLHF	8	7.09465e-05	TCRBV03	TCRBD01-01*01	TCRBJ01-06*01
TCGGCTGCTCCCTCCCAGACATCTGTGTACTTCTGTGCCAGCAGTTACTCGAACAGTATGGGGGCCGGGGAGCTGTTTTTTGGAGAA	CASSYSNSMGAGELFF	8	7.09465e-05	TCRBV06-05*01	unknown	TCRBJ02-02*01
CTGTCGGCTGCTCCCTCCCAGACATCTGTGTACTTCTGTGCCAGCAGTTACGTCCAGGGGGTTTCCTACGAGCAGTACTTCGGGCCG	CASSYVQGVSYEQYF	8	7.09465e-05	TCRBV06-05*01	TCRBD01-01*01	TCRBJ02-07*01
CTGTCGGCTGCTCCCTCCCAGACATCTGTGTACTTCTGTGCCAGCAGTTACCGGGACAGGGGATTCTACGAGCAGTACTTCGGGCCG	CASSYRDRGFYEQYF	8	7.09465e-05	TCRBV06-05*01	TCRBD01-01*01	TCRBJ02-07*01
ACCTTGGAGCTGGGGGACTCGGCCCTTTATCTTTGCGCCAGCAGCCCCGGATATCGGGGCCTTATTTGGCCCCAGCATTTTGGTGAT	CASSPGYRGLIWPQHF	8	7.09465e-05	TCRBV05-01*01	unknown	TCRBJ01-05*01
ATGAATGTGAGCACCTTGGAGCTGGGGGACTCGGCCCTTTATCTTTGCGCCAGCAGCAACCGGGGTGGGGTCGCTTTCTTTGGACAA	CASSNRGGVAFF	8	7.09465e-05	TCRBV05-01*01	TCRBD02-01*01	TCRBJ01-01*01
AATGTGAACGCCTTGGAGCTGGACGACTCGGCCCTGTATCTCTGTGCCAGCAGCTCAAGACTGGGCTACGAGCAGTACTTCGGGCCG	CASSSRLGYEQYF	8	7.09465e-05	TCRBV05-04*01	TCRBD02-01	TCRBJ02-07*01
ACCTTGGAGCTGGGGGACTCGGCCCTTTATCTTTGCGCCAGCAGCTCTTTAGCGGCGGACGCCTACAATGAGCAGTTCTTCGGGCCA	CASSSLAADAYNEQFF	8	7.09465e-05	TCRBV05-01*01	TCRBD02-01	TCRBJ02-01*01
CTGGAGTCGGCTGCTCCCTCCCAGACATCTGTGTACTTCTGTGCCAGCATCCCGACAGGGTCTAACTATGGCTACACCTTCGGTTCG	CASIPTGSNYGYTF	8	7.09465e-05	TCRBV06-01*01	TCRBD01-01*01	TCRBJ01-02*01
GAGTCTGCTGCCTCCTCCCAGACATCTGTATATTTCTGCGCCAGCAGTGAGTCGGTAGACATTGGCACTGAAGCTTTCTTTGGACAA	CASSESVDIGTEAFF	8	7.09465e-05	TCRBV10-01	TCRBD01-01*01	TCRBJ01-01*01
GTGACATCGGCCCAAAAGAACCCGACAGCTTTCTATCTCTGTGCCAGTAGTAGACGGGGCGGTACCGGGGAGCTGTTTTTTGGAGAA	CASSRRGGTGELFF	8	7.09465e-05	TCRBV19-01	unknown	TCRBJ02-02*01
GAGCTTGGGGACTCGGCCGTGTATCTCTGTGCCAGCAGCTTAGACCCATTAATAGGGGGGGGTCATTCACCCCTCCACTTTGGGAAC	CASSLDPLIGGGHSPLHF	8	7.09465e-05	TCRBV11-03*01	TCRBD02-01*01	TCRBJ01-06*01
ATCCAGCCCTCAGAACCCAGGGACTCAGCTGTGTACTTCTGTGCCAGCAGGAGGGGGGAATCCGGAAACACCATATATTTTGGAGAG	CASRRGESGNTIYF	8	7.09465e-05	TCRBV12	unknown	TCRBJ01-03*01
AGCACCTTGGAGCTGGGGGACTCGGCCCTTTATCTTTGCGCCAGCAGCCACGGGACTAGCTCCACAGATACGCAGTATTTTGGCCCA	CASSHGTSSTDTQYF	8	7.09465e-05	TCRBV05-01*01	TCRBD02-01	TCRBJ02-03*01
GAGCTGGACGACTCGGCCCTGTATCTCTGTGCCAGCAGCTTTGAACTAGCGGGGGGAATCTCCTACAATGAGCAGTTCTTCGGGCCA	CASSFELAGGISYNEQFF	8	7.09465e-05	TCRBV05-04*01	TCRBD02-01*01	TCRBJ02-01*01
CACCTACACACCCTGCAGCCAGAAGACTCGGCCCTGTATCTCTGCGCCAGCAGCCAAGGACAGAACTATGGCTACACCTTCGGTTCG	CASSQGQNYGYTF	8	7.09465e-05	TCRBV04-03*01	TCRBD01-01*01	TCRBJ01-02*01
CTTGACATCCGCTCACCAGGCCTGGGGGACGCAGCCATGTACCTGTGTGCCACCAGCAGAGATCAAAGTGGCTACACCTTCGGTTCG	CATSRDQSGYTF	8	7.09465e-05	TCRBV15-01*01	unknown	TCRBJ01-02*01
GAGCTGAATGTGAACGCCTTGTTGCTGGGGGACTCGGCCCTCTATCTCTGTGCCAGCAGCTTGGTGGAGACCCAGTACTTCGGGCCA	CASSLVETQYF	8	7.09465e-05	TCRBV05-06*01	unknown	TCRBJ02-05*01
ATCCAGCAGGTAGTGCGAGGAGATTCGGCAGCTTATTTCTGTGCCAGCTCACTGCTCGGGGGTAGGGATGAGCAGTTCTTCGGGCCA	CASSLLGGRDEQFF	8	7.09465e-05	TCRBV18-01*01	TCRBD02-01*01	TCRBJ02-01*01
ATCCAGCGCACAGAGCAGGGGGACTCGGCCATGTATCTCTGTGCCAGCAGCTTAGCGGCCAGCCAGACTGAAGCTTTCTTTGGACAA	CASSLAASQTEAFF	8	7.09465e-05	TCRBV07-09	unknown	TCRBJ01-01*01
CTAGAGTCTGCCATCCCCAACCAGACAGCTCTTTACTTCTGTGCCACCAGTGCGGGGGCGGGGTCCGGGGAGCTGTTTTTTGGAGAA	CATSAGAGSGELFF	7	6.20782e-05	TCRBV24	unknown	TCRBJ02-02*01
AAGATCCGGTCCACAAAGCTGGAGGACTCAGCCATGTACTTCTGTGCCAGCGGAGGGACAGGGCTTTACGAGCAGTACTTCGGGCCG	CASGGTGLYEQYF	7	6.20782e-05	TCRBV02-01*01	TCRBD01-01*01	TCRBJ02-07*01
AACGCCTTGGAGCTGGACGACTCGGCCCTGTATCTCTGTGCCAGCATCGGGACAGGGGGCGAACCTTCACCCCTCCACTTTGGGAAC	CASIGTGGEPSPLHF	7	6.20782e-05	TCRBV05-04*01	TCRBD01-01*01	TCRBJ01-06*01
CTGACGATCCAGCGCACAGAGCAGCGGGACTCGGCCATGTATCGCTGTGCCAGCAGCTCTACCTACAATGAGCAGTTCTTCGGGCCA	CASSSTYNEQFF	7	6.20782e-05	TCRBV07-06*01	TCRBD02-01	TCRBJ02-01*01
ATCCTGGAGTCGCCCAGCCCCAACCAGACCTCTCTGTACTTCTGTGCCAGCAGCGGACCGGGACCACTTGAAGCTTTCTTTGGACAA	CASSGPGPLEAFF	7	6.20782e-05	TCRBV27-01*01	unknown	TCRBJ01-01*01
CTGTCGGCTGCTCCCTCCCAGACATCTGTGTACTTCTGTGCCAGCAGTTCCGGCGGGGGGGGGACCTACGAGCAGTACTTCGGGCCG	CASSSGGGGTYEQYF	7	6.20782e-05	TCRBV06-05*01	TCRBD02-01*01	TCRBJ02-07*01
ACAGTGACCAGTGCCCATCCTGAAGACAGCAGCTTCTACATCTGCAGTGCCCCAGCGGGGGGCCGGGAGACCCAGTACTTCGGGCCA	CSAPAGGRETQYF	7	6.20782e-05	TCRBV20	TCRBD02-01*01	TCRBJ02-05*01
TCGCCCAGCCCCAACCAGACCTCTCTGTACTTCTGTGCCAGCAGTTTATCCTACGTCCAGGTGAACACTGAAGCTTTCTTTGGACAA	CASSLSYVQVNTEAFF	7	6.20782e-05	TCRBV27-01*01	TCRBD01-01*01	TCRBJ01-01*01
ATCAATTCCCTGGAGCTTGGTGACTCTGCTGTGTATTTCTGTGCCAGCAGCCTCGGGGGACAGAACACTGAAGCTTTCTTTGGACAA	CASSLGGQNTEAFF	7	6.20782e-05	TCRBV03	unknown	TCRBJ01-01*01
AACGCCTTGGAGCTGGACGACTCGGCCCTGTATCTCTGTGCCAGCAGCTCCAAAATAACAAACACCGGGGAGCTGTTTTTTGGAGAA	CASSSKITNTGELFF	7	6.20782e-05	TCRBV05-04*01	TCRBD01-01*01	TCRBJ02-02*01
CTGGAGCTGGGGGACTCAGCTTTGTATTTCTGTGCCAGCAGCGTATCCGCCCGGGGGGCAGGGGACTATGGCTACACCTTCGGTTCG	CASSVSARGAGDYGYTF	7	6.20782e-05	TCRBV09-01	TCRBD02-01*01	TCRBJ01-02*01
ACAGTGACCAGTGCCCATCCTGAAGACAGCAGCTTCTACATCTGCAGTGCTAGAACGGGGACCTCCGATACGCAGTATTTTGGCCCA	CSARTGTSDTQYF	7	6.20782e-05	TCRBV20	unknown	TCRBJ02-03*01
GCCCATCCTGAAGACAGCAGCTTCTACATCTGCAGTGCTAGAGATGGCGCGCGAGGGGCTTTCGATTCACCCCTCCACTTTGGGAAC	CSARDGARGAFDSPLHF	7	6.20782e-05	TCRBV20	unknown	TCRBJ01-06*01
CGCACAGAGCAGGGGGACTCAGCCGTGTATCTCCGTGCCAGCAGCTTAACTAGTCGGGGGGCCGGAGAGACCCAGTACTTCGGGCCA	RASSLTSRGAGETQYF	7	6.20782e-05	TCRBV07-03*02	TCRBD02-01*01	TCRBJ02-05*01
CAGCAGGTAGTGCGAGGAGATTCGGCAGCTTATTTCTGTGCCAGCTCGCTCACAGGGGAGAAGACCGGGGAGCTGTTTTTTGGAGAA	CASSLTGEKTGELFF	7	6.20782e-05	TCRBV18-01*01	TCRBD01-01*01	TCRBJ02-02*01
TCGGCTGCTCCCTCCCAGACATCTGTGTACTTCTGTGCCAGCAGTGAAGCGGGAGGGAGGCTTGGCTATGGCTACACCTTCGGTTCG	CASSEAGGRLGYGYTF	7	6.20782e-05	TCRBV06-01*01	TCRBD02-01*02	TCRBJ01-02*01
GAGCTGGGGGACTCGGCCCTTTATCTTTGCGCCAGCAGCTTGGCCGGCGAGCGGGGGGGTTTAACAGATACGCAGTATTTTGGCCCA	CASSLAGERGGLTDTQYF	7	6.20782e-05	TCRBV05-01*01	TCRBD02-01*01	TCRBJ02-03*01
TTGGAGTCGGCTGCTCCCTCCCAAACATCTGTGTACTTCTGTGCCAGCAGGGGGGTGGGCAGGAACACTGAAGCTTTCTTTGGACAA	CASRGVGRNTEAFF	7	6.20782e-05	TCRBV06	unknown	TCRBJ01-01*01
CAGCGCACACAGCAGGAGGACTCGGCCGTGTATCTCTGTGCCAGCAGCTCCCACAGGGGATTTAACTATGGCTACACCTTCGGTTCG	CASSSHRGFNYGYTF	7	6.20782e-05	TCRBV07-02*01	TCRBD01-01*01	TCRBJ01-02*01
CTGGAGTCGCCCAGCCCCAACCAGACCTCTCTGTACTTCTGTGCCAGCAGTTTTTGGGGGGGCACCGGGGAGCTGTTTTTTGGAGAA	CASSFWGGTGELFF	7	6.20782e-05	TCRBV27-01*01	TCRBD02-01*01	TCRBJ02-02*01
ACATCGGCCCAAAAGAACCCGACAGCTTTCTATCTCTGTGCCAGTAGCCGTGGAGGGGGCGCGAACTATGGCTACACCTTCGGTTCG	CASSRGGGANYGYTF	7	6.20782e-05	TCRBV19-01	TCRBD01-01*01	TCRBJ01-02*01
ACCAGTGCCCATCCTGAAGACAGCAGCTTCTACATCTGCAGTGCTAGAGTCCACGGGACAGCCAAGGACGAGCAGTACTTCGGGCCG	CSARVHGTAKDEQYF	7	6.20782e-05	TCRBV20	TCRBD01-01*01	TCRBJ02-07*01
CTGCTGTCGGCTGCTCCCTCCCAGACATCTGTGTACTTCTGTGCCAACAGGAGAGGGACGTCTAACTATGGCTACACCTTCGGTTCG	CANRRGTSNYGYTF	7	6.20782e-05	TCRBV06-05*01	unknown	TCRBJ01-02*01
GAGTCTGCTGCCTCCTCCCAGACATCTGTATATTTCTGCGCCAGCAGTGAGTACAGGGGGCTCGCCGGGGAGCTGTTTTTTGGAGAA	CASSEYRGLAGELFF	7	6.20782e-05	TCRBV10-01	TCRBD01-01*01	TCRBJ02-02*01
ACAGTGACCAGTGCCCATCCTGAAGACAGCAGCTTCTACATCTGCAGTGCTTGGGACGGTAACAACTATGGCTACACCTTCGGTTCG	CSAWDGNNYGYTF	7	6.20782e-05	TCRBV20	unknown	TCRBJ01-02*01
GTGACATCGGCCCAAAAGAACCCGACAGCTTTCTATCTCTGTGCCAGTTCAGGGGGTTTGTCCCACAATGAGCAGTTCTTCGGGCCA	CASSGGLSHNEQFF	7	6.20782e-05	TCRBV19-01	TCRBD01-01*01	TCRBJ02-01*01
ACCAGTGCCCATCCTGAAGACAGCAGCTTCTACATCTGCAGTGCTAGCCGCGGGGACAGGGGGCGCGTTGGCTACACCTTCGGTTCG	CSASRGDRGRVGYTF	7	6.20782e-05	TCRBV20	TCRBD01-01*01	TCRBJ01-02*01
ATCCAGCAGGTAGTGCGAGGAGATTCGGCAGCTTATTTCTGTGCCAGCTCGAGGGCCAGGGGTTCCTACGAGCAGTACTTCGGGCCG	CASSRARGSYEQYF	7	6.20782e-05	TCRBV18-01*01	TCRBD01-01*01	TCRBJ02-07*01
GTGAGCAACATGAGCCCTGAAGACAGCAGCATATATCTCTGCAGCGTGGATAAGTCCGATTGGGGCTATGGCTACACCTTCGGTTCG	CSVDKSDWGYGYTF	7	6.20782e-05	TCRBV29-01*01	unknown	TCRBJ01-02*01
ACCAGTGCCCATCCTGAAGACAGCAGCTTCTACATCTGCAGTGCTAGAGACCGCCGGCACAGCAATCAGCCCCAGCATTTTGGTGAT	CSARDRRHSNQPQHF	7	6.20782e-05	TCRBV20	unknown	TCRBJ01-05*01
CTGAAGATCCAGCCCTCAGAACCCAGGGACTCAGCTGTGTACTTCTGTGCCAGCACCTTGGGACCGACTGAAGCTTTCTTTGGACAA	CASTLGPTEAFF	7	6.20782e-05	TCRBV12	unknown	TCRBJ01-01*01
AATGTGAGCACCTTGGAGCTGGGGGACTCGGCCCTTTATCTTTGCGCCAGCAGCTTGCCTAGCCAAGAGACCCAGTACTTCGGGCCA	CASSLPSQETQYF	7	6.20782e-05	TCRBV05-01*01	TCRBD02-01	TCRBJ02-05*01
AGCTCTCTGGAGCTGGGGGACTCAGCTTTGTATTTCTGTGCCAGCAGCCCCCAGACCGATGTAATCACTGAAGCTTTCTTTGGACAA	CASSPQTDVITEAFF	7	6.20782e-05	TCRBV09-01	unknown	TCRBJ01-01*01
GTGAACGCCTTGTTGCTGGGGGACTCGGCCCTCTATCTCTGTGCCAGCAGCCCACCGCTCCGTGGGGCCGAAGCTTTCTTTGGACAA	CASSPPLRGAEAFF	7	6.20782e-05	TCRBV05-06*01	TCRBD01-01*01	TCRBJ01-01*01
AGGCTGCTGTCGGCTGCTCCCTCCCAGACATCTGTGTACTTCTGTGCCAGCAGTGTGACAGGGGTGAAGACCCAGTACTTCGGGCCA	CASSVTGVKTQYF	7	6.20782e-05	TCRBV06-05*01	TCRBD01-01*01	TCRBJ02-05*01
AACCTGAGCTCTCTGGAGCTGGGGGACTCAGCTTTGTATTTCTGTGCCAGCAGCGTAAAGGGCACCGGGGAGCTGTTTTTTGGAGAA	CASSVKGTGELFF	7	6.20782e-05	TCRBV09-01	unknown	TCRBJ02-02*01
AAGATCCGGTCCACAAAGCTGGAGGACTCAGCCATGTACTTCTGTGCCAGCAGTCGGGGGGAGGGGACTGAAGCTTTCTTTGGACAA	CASSRGEGTEAFF	7	6.20782e-05	TCRBV02-01*01	TCRBD02-01	TCRBJ01-01*01
ACCAGTGCCCATCCTGAAGACAGCAGCTTCTACATCTGCAGTGCTAGAGATAGGAAGGGGTGGGGAACTGAAGCTTTCTTTGGACAA	CSARDRKGWGTEAFF	7	6.20782e-05	TCRBV20	TCRBD01-01*01	TCRBJ01-01*01
AGGCTGCTGTCGGCTGCTCCCTCCCAGACATCTGTGTACTTCTGTGCCAGCAGTGCCCCGGGTTCCGGCGAGCAGTACTTCGGGCCG	CASSAPGSGEQYF	7	6.20782e-05	TCRBV06-05*01	TCRBD02-01	TCRBJ02-07*01
GCCCTGCAGCCAGAAGACTCAGCCCTGTATCTCTGCGCCAGCAGCCGGGGACAGGGGAGCGGTGGAAACACCATATATTTTGGAGAG	CASSRGQGSGGNTIYF	7	6.20782e-05	TCRBV04-01*01	TCRBD01-01*01	TCRBJ01-03*01
GTGAACGCCTTGGAGCTGGACGACTCGGCCCTGTATCTCTGTGCCAGCAGCGAGCCGACGGGCACAGATACGCAGTATTTTGGCCCA	CASSEPTGTDTQYF	7	6.20782e-05	TCRBV05-04*01	unknown	TCRBJ02-03*01
CTGCTGTCGGCTGCTCCCTCCCAGACATCTGTGTACTTCTGTGCCAGCAGTTACCAGGACGGGCGGGAGACCCAGTACTTCGGGCCA	CASSYQDGRETQYF	7	6.20782e-05	TCRBV06-05*01	unknown	TCRBJ02-05*01
CTGAAGATCCAGCCCTCAGAACCCAGGGACTCAGCTGTGTACTTCTGTGCCAGCAGTTTATTCACCTACGAGCAGTACTTCGGGCCG	CASSLFTYEQYF	7	6.20782e-05	TCRBV12	TCRBD01-01*01	TCRBJ02-07*01
GAGCTTGGGGACTCGGCCGTGTATCTCTGTGCCAGCAGCTTCTCCGGGACTAGCGGGTCTGGAATCGGGCAGCAGTTCTTCGGGCCA	CASSFSGTSGSGIGQQFF	7	6.20782e-05	TCRBV11-03*01	TCRBD02-01	TCRBJ02-01*01
AACCTGAGCTCTCTGGAGCTGGGGGACTCAGCTTTGTATTTCTGTGCCAGCAGCCCCGGAGGGCCCTATGGCTACACCTTCGGTTCG	CASSPGGPYGYTF	7	6.20782e-05	TCRBV09-01	TCRBD02-01*02	TCRBJ01-02*01
CTACACGCCCTGCAGCCAGAAGACTCAGCCCTGTATCTCTGCGCCAGCAGCCAACATAACTCCTTGGTGGCCCTCCACTTTGGGAAC	CASSQHNSLVALHF	7	6.20782e-05	TCRBV04-01*01	TCRBD02-01	TCRBJ01-06*01
GTGAGCACCTTGGAGCTGGGGGACTCGGCCCTTTATCTTTGCGCCAGCAGCTTGGAGGTAAATAATTCACCCCTCCACTTTGGGAAC	CASSLEVNNSPLHF	7	6.20782e-05	TCRBV05-01*01	unknown	TCRBJ01-06*01
CACATCAATTCCCTGGAGCTTGGTGACTCTGCTGTGTATTTCTGTGCCAGCAGTTTTGCAACTAATGAAAAACTGTTTTTTGGCAGT	CASSFATNEKLFF	7	6.20782e-05	TCRBV03	unknown	TCRBJ01-04*01
AAGATCCAGCGCACACAGCAGGAGGACTCCGCCGTGTATCTCTGTGCCAGCAGCCCCGAGAGCTCCTACGAGCAGTACTTCGGGCCG	CASSPESSYEQYF	7	6.20782e-05	TCRBV07-08*01	TCRBD02-01*02	TCRBJ02-07*01
ACATCGGCCCAAAAGAACCCGACAGCTTTCTATCTCTGTGCCAGTAGTATACAGCAGGGACGGACTTCTGAAGCTTTCTTTGGACAA	CASSIQQGRTSEAFF	7	6.20782e-05	TCRBV19-01	unknown	TCRBJ01-01*01
ATCCGGTCCACAAAGCTGGAGGACTCAGCCATGTACTTCTGTGCCAGCAGTGAATACATGGGGGGAAACACCATATATTTTGGAGAG	CASSEYMGGNTIYF	7	6.20782e-05	TCRBV02-01*01	unknown	TCRBJ01-03*01
CTGAGCTCTCTGGAGCTGGGGGACTCAGCTTTGTATTTCTGTGCCAGCAGCGTAGGCTCAGGGGCCTTTGAAGCTTTCTTTGGACAA	CASSVGSGAFEAFF	7	6.20782e-05	TCRBV09-01	TCRBD01-01*01	TCRBJ01-01*01
AGGCTGCTGTCGGCTGCTCCCTCCCAGACATCTGTGTACTTCTGTGCCAGCAGTTCGACTGCTAACTATGGCTACACCTTCGGTTCG	CASSSTANYGYTF	7	6.20782e-05	TCRBV06-05*01	TCRBD02-01	TCRBJ01-02*01
GCCTCCTCCCAGACATCTGTATATTTCTGCGCCAGCATTGACGACAGGAGTAACAAATCTGGGGCCAACGTCCTGACTTTCGGGGCC	CASIDDRSNKSGANVLTF	7	6.20782e-05	TCRBV10-01	TCRBD01-01*01	TCRBJ02-06*01
CAGCAGGTAGTGCGAGGAGATTCGGCAGCTTATTTCTGTGCCAGCTCACCACCGATGCGGCACGGGGATACGCAGTATTTTGGCCCA	CASSPPMRHGDTQYF	7	6.20782e-05	TCRBV18-01*01	TCRBD02-01	TCRBJ02-03*01
ATCCAGCGCACACAGCAGGAGGACTCCGCCGTGTATCTCTGTGCCAGCAGCTCTCAGGGGGGGAATTCACCCCTCCACTTTGGGAAC	CASSSQGGNSPLHF	7	6.20782e-05	TCRBV07-08*01	unknown	TCRBJ01-06*01
ACGATCCAGCGCACAGAGCAGCGGGACTCGGCCATGTATCGCTGTGCCAGCAGCCCACAGGGCAACTATGGCTACACCTTCGGTTCG	CASSPQGNYGYTF	7	6.20782e-05	TCRBV07-06*01	TCRBD01-01*01	TCRBJ01-02*01
CTGCTGTCGGCTGCTCCCTCCCAGACATCTGTGTACTTCTGTGCCAGCAGTCCCTACAGGGGTAATCAGCCCCAGCATTTTGGTGAT	CASSPYRGNQPQHF	7	6.20782e-05	TCRBV06-05*01	TCRBD01-01*01	TCRBJ01-05*01
TCCCTGGAGCTTGGTGACTCTGCTGTGTATTTCTGTGCCAGCAGGCATTTGGTGGGTTCCGGAGACACTGAAGCTTTCTTTGGACAA	CASRHLVGSGDTEAFF	7	6.20782e-05	TCRBV03	TCRBD02-01*02	TCRBJ01-01*01
CTGACTGTGAGCAACATGAGCCCTGAAGACAGCAGCATATATCTCTGCAGCGTCCAACTCGACCCCTACGAGCAGTACTTCGGGCCG	CSVQLDPYEQYF	7	6.20782e-05	TCRBV29-01*01	unknown	TCRBJ02-07*01
ATCCAGCGCACAGAGCAGGGGGACTCGGCCATGTATCTCTGTGCCAGCGGTACTCACGGGGAAGGCACTGAAGCTTTCTTTGGACAA	CASGTHGEGTEAFF	7	6.20782e-05	TCRBV07-09	TCRBD02-01*01	TCRBJ01-01*01
AATTCCCTGGAGCTTGGTGACTCTGCTGTGTATTTCTGTGCCAGCAGCCAAGTCCAGGCGTCTGGAAACACCATATATTTTGGAGAG	CASSQVQASGNTIYF	7	6.20782e-05	TCRBV03	TCRBD01-01*01	TCRBJ01-03*01
AAGATCCAGCCTGCAAAGCTTGAGGACTCGGCCGTGTATCTCTGTGCCAGCAGCTTAGAAGGGAAAAATGAGCAGTTCTTCGGGCCA	CASSLEGKNEQFF	7	6.20782e-05	TCRBV11-02*02	unknown	TCRBJ02-01*01
GAGTCGGCTGCTCCCTCCCAGACATCTGTGTACTTCTGTGCCAGCAGTGCACAGGGTTCTGGCACAGATACGCAGTATTTTGGCCCA	CASSAQGSGTDTQYF	7	6.20782e-05	TCRBV06-01*01	TCRBD01-01*01	TCRBJ02-03*01
AGGATCCAGCAGGTAGTGCGAGGAGATTCGGCAGCTTATTTCTGTGCCAGCTCACCAAAACAGGGTCAGCCCCAGCATTTTGGTGAT	CASSPKQGQPQHF	7	6.20782e-05	TCRBV18-01*01	TCRBD01-01*01	TCRBJ01-05*01
CTTCACATCAATTCCCTGGAGCTTGGTGACTCTGCTGTGTATTTCTGTGCCAGCAGCCAAGCGGGCTATGGCTACACCTTCGGTTCG	CASSQAGYGYTF	7	6.20782e-05	TCRBV03	TCRBD02-01	TCRBJ01-02*01
AATGTGAGCACCTTGGAGCTGGGGGACTCGGCCCTTTATCTTTGCGCCAGCAGCCACCGGGACGCCAATGAGCAGTTCTTCGGGCCA	CASSHRDANEQFF	7	6.20782e-05	TCRBV05-01*01	unknown	TCRBJ02-01*01
CAGCGCACACAGCAGGAGGACTCGGCCGTGTATCTCTGTGCCAGCAGCTTAGATCGAACCTACACAGATACGCAGTATTTTGGCCCA	CASSLDRTYTDTQYF	7	6.20782e-05	TCRBV07-02*01	TCRBD02-01	TCRBJ02-03*01
CTGAGCTCTCTGGAGCTGGGGGACTCAGCTTTGTATTTCTGTGCCAGCAGCGTCATACAGGTGAACACTGAAGCTTTCTTTGGACAA	CASSVIQVNTEAFF	7	6.20782e-05	TCRBV09-01	TCRBD01-01*01	TCRBJ01-01*01
TCGGCTGCTCCCTCCCAGACATCTGTGTACTTCTGTGCCAGCAGTGCCCACAGGGGTAACTCTGGAAACACCATATATTTTGGAGAG	CASSAHRGNSGNTIYF	7	6.20782e-05	TCRBV06-01*01	TCRBD01-01*01	TCRBJ01-03*01
GTGACATCGGCCCAAAAGAACCCGACAGCTTTCTATCTCTGTGCCAGTCGGGAGACAGGGGGGAGGACTGAAGCTTTCTTTGGACAA	CASRETGGRTEAFF	7	6.20782e-05	TCRBV19-01	TCRBD01-01*01	TCRBJ01-01*01
CACATCAATTCCCTGGAGCTTGGTGACTCTGCTGTGTATTTCTGTGCCAGCAGTCGCAGCGGGGAGGATACGCAGTATTTTGGCCCA	CASSRSGEDTQYF	7	6.20782e-05	TCRBV03	TCRBD02-01*01	TCRBJ02-03*01
CTGCTGTCGGCTGCTCCCTCCCAGACATCTGTGTACTTCTGTGCCAGCAGTAGGGAGGGGGGTAATTCACCCCTCCACTTTGGGAAC	CASSREGGNSPLHF	7	6.20782e-05	TCRBV06-05*01	TCRBD02-01*02	TCRBJ01-06*01
GTGACATCGGCCCAAAAGAACCCGACAGCTTTCTATCTCTGTGCCAGTAGTATCGGGCCGGATGGAAACACCATATATTTTGGAGAG	CASSIGPDGNTIYF	7	6.20782e-05	TCRBV19-01	unknown	TCRBJ01-03*01
GAGATCCAGTCCACGGAGTCAGGGGACACAGCACTGTATTTCTGTGCCGCATCCCGGGACATAAGAAACACCATATATTTTGGAGAG	CAASRDIRNTIYF	7	6.20782e-05	TCRBV21-01*01	TCRBD01-01*01	TCRBJ01-03*01
CTGGAGTCGGCTGCTCCCTCCCAGACATCTGTGTACTTCTGTGCCAGCAATGGTGGACAGGGGGATTATGGCTACACCTTCGGTTCG	CASNGGQGDYGYTF	7	6.20782e-05	TCRBV06-01*01	TCRBD01-01*01	TCRBJ01-02*01
ATCCGGTCCACAAAGCTGGAGGACTCAGCCATGTACTTCTGTGCCAGCAGTGAATCTGGGGGGTTGGAGCCCCAGCATTTTGGTGAT	CASSESGGLEPQHF	7	6.20782e-05	TCRBV02-01*01	TCRBD02-01*01	TCRBJ01-05*01
ATCCAGCCCTCAGAACCCAGGGACTCAGCTGTGTACTTCTGTGCCAGCAGGCGGGGGGCGGGGGCAGATACGCAGTATTTTGGCCCA	CASRRGAGADTQYF	7	6.20782e-05	TCRBV12	TCRBD02-01*01	TCRBJ02-03*01
AGTGCCTTGGAGCTGGGGGACTCGGCCCTGTATCTCTGTGCCAGAAGCTTTCAACCGGGGGTCCACAATGAGCAGTTCTTCGGGCCA	CARSFQPGVHNEQFF	7	6.20782e-05	TCRBV05-03	TCRBD02-01*01	TCRBJ02-01*01
TCGGCTGCTCCCTCCCAGACATCTGTGTACTTCTGTGCCAGCAGTCCCGTCCCGGGGGGGCGGGCCGGGGAGCTGTTTTTTGGAGAA	CASSPVPGGRAGELFF	7	6.20782e-05	TCRBV06	TCRBD02-01*01	TCRBJ02-02*01
CTGGAGTTGGCTGCTCCCTCCCAGACATCTGTGTACTTCTGTGCCAGCAGTCCACAGGGAATGGCCTACGAGCAGTACTTCGGGCCG	CASSPQGMAYEQYF	7	6.20782e-05	TCRBV06-06	TCRBD01-01*01	TCRBJ02-07*01
CTGTCGGCTGCTCCCTCCCAGACATCTGTGTACTTCTGTGCCAGCAGCCCGACAGGCATAAAGAACACTGAAGCTTTCTTTGGACAA	CASSPTGIKNTEAFF	7	6.20782e-05	TCRBV06-05*01	TCRBD01-01*01	TCRBJ01-01*01
CTGAAGATCCAGCCCTCAGAACCCAGGGACTCAGCTGTGTACTTCTGTGCCAGCAGTTTGCGGGGTCAGCCCCAGCATTTTGGTGAT	CASSLRGQPQHF	7	6.20782e-05	TCRBV12	TCRBD02-01*01	TCRBJ01-05*01
GCTGCTCCCTCCCAGACATCTGTGTACTTCTGTGCCAGCAGTGGGAGTGGGGCAAGGGGGCTATTGGGCGAGCAGTACTTCGGGCCG	CASSGSGARGLLGEQYF	7	6.20782e-05	TCRBV06-01*01	TCRBD01-01*01	TCRBJ02-07*01
GTGACATCGGCCCAAAAGAACCCGACAGCTTTCTATCTCTGTGCCAGTAGTATAACAGCGAACACCGGGGAGCTGTTTTTTGGAGAA	CASSITANTGELFF	7	6.20782e-05	TCRBV19-01	TCRBD01-01*01	TCRBJ02-02*01
AACATGAGCCCTGAAGACAGCAGCATATATCTCTGCAGCGTGATACCGGGACAGGGGCAATCGGTCTATGGCTACACCTTCGGTTCG	CSVIPGQGQSVYGYTF	7	6.20782e-05	TCRBV29-01*01	TCRBD01-01*01	TCRBJ01-02*01
CAGCGCACACAGCAGGAGGACTCGGCCGTGTATCTCTGTGCCAGCAGCACTAGCGGGGGCTTCCAAGAGACCCAGTACTTCGGGCCA	CASSTSGGFQETQYF	7	6.20782e-05	TCRBV07-02*01	TCRBD02-01*01	TCRBJ02-05*01
ATCCAGCGCACACAGCAGGAGGACTCGGCCGTGTATCTCTGTGCCAGCAGCGCGGACAGCTCGAGGAACATTCAGTACTTCGGCGCC	CASSADSSRNIQYF	7	6.20782e-05	TCRBV07-02*01	TCRBD01-01*01	TCRBJ02-04*01
CTGGAGTCTGCCAGGCCCTCACATACCTCTCAGTACCTCTGTGCCAGCAGTGACCAGTTGGGCACCGGGGAGCTGTTTTTTGGAGAA	CASSDQLGTGELFF	7	6.20782e-05	TCRBV25-01*01	unknown	TCRBJ02-02*01
ACCAGTGCCCATCCTGAAGACAGCAGCTTCTACATCTGCAGTGCTAGGTTTAGCGGGGCGTCTTACAATGAGCAGTTCTTCGGGCCA	CSARFSGASYNEQFF	7	6.20782e-05	TCRBV20	TCRBD02-01*01	TCRBJ02-01*01
ATCCAGCCCTCAGAACCCAGGGACTCAGCTGTGTACTTCTGTGCCAGCAGTTTAGTGACACTCGGAAACACCATATATTTTGGAGAG	CASSLVTLGNTIYF	7	6.20782e-05	TCRBV12	TCRBD01-01*01	TCRBJ01-03*01
TCGGCCCAAAAGAACCCGACAGCTTTCTATCTCTGTGCCAGTAGACCCGGGACAGGGACTTGGCCAGATACGCAGTATTTTGGCCCA	CASRPGTGTWPDTQYF	7	6.20782e-05	TCRBV19-01	TCRBD01-01*01	TCRBJ02-03*01
CTGAGCTCTCTGGAGCTGGGGGACTCAGCTTTGTATTTCTGTGCCAGCAGCGTAGCTACGGCTAACTATGGCTACACCTTCGGTTCG	CASSVATANYGYTF	7	6.20782e-05	TCRBV09-01	TCRBD02-01	TCRBJ01-02*01
ACTGTGACATCGGCCCAAAAGAACCCGACAGCTTTCTATCTCTGTGCCAGTAGTATTGGGACGGTCATCCCCCAGCATTTTGGTGAT	CASSIGTVIPQHF	7	6.20782e-05	TCRBV19-01	unknown	TCRBJ01-05*01
GAGTCGGCTGCTCCCTCCCAGACATCTGTGTACTTCTGTGCCAGCAGTGAAGAGGTAGCGGGGGGCTACGAGCAGTACTTCGGGCCG	CASSEEVAGGYEQYF	7	6.20782e-05	TCRBV06-01*01	TCRBD02-01*01	TCRBJ02-07*01
CTGAAGATCCAGCCCTCAGAACCCAGGGACTCAGCTGTGTACTTCTGTGCCAGCAGTTTTTTTCCCTACGAGCAGTACTTCGGGCCG	CASSFFPYEQYF	7	6.20782e-05	TCRBV12	unknown	TCRBJ02-07*01
AGTGCCCATCCTGAAGACAGCAGCTTCTACATCTGCAGTGCTAGAGAGTATAAGGGGGGGTTGAACTATGGCTACACCTTCGGTTCG	CSAREYKGGLNYGYTF	7	6.20782e-05	TCRBV20	TCRBD02-01*01	TCRBJ01-02*01
GTGACCAGTGCCCATCCTGAAGACAGCAGCTTCTACATCTGCAGTGCTAGAGCGCTAGCGGGGGCAGATACGCAGTATTTTGGCCCA	CSARALAGADTQYF	7	6.20782e-05	TCRBV20	TCRBD02-01*01	TCRBJ02-03*01
ATCCAGCCCTCAGAACCCAGGGACTCAGCTGTGTACTTCTGTGCCAGCAGGCTAACTAGCGGTCGAGGCGAGCAGTACTTCGGGCCG	CASRLTSGRGEQYF	7	6.20782e-05	TCRBV12	TCRBD02-01	TCRBJ02-07*01
CGCACAGAGCAGCGGGACTCAGCCATGTATCGCTGTGCCAGCAGCTTAGGTCGACTAGTGGGGGTCGGTGAGCAGTTCTTCGGGCCA	CASSLGRLVGVGEQFF	7	6.20782e-05	TCRBV07-07*01	TCRBD02-01	TCRBJ02-01*01
CTCACTCTGGAGTCCGCTACCAGCTCCCAGACATCTGTGTACTTCTGTGCCATCAGCTCCGGGCTCTATGGCTACACCTTCGGTTCG	CAISSGLYGYTF	7	6.20782e-05	TCRBV10-03*01	unknown	TCRBJ01-02*01
TCGGCCCAAAAGAACCCGACAGCTTTCTATCTCTGTGCCAGTAGTGATTGGGACAGGGCGAACACCGGGGAGCTGTTTTTTGGAGAA	CASSDWDRANTGELFF	7	6.20782e-05	TCRBV19-01	TCRBD01-01*01	TCRBJ02-02*01
CACATCAATTCCCTGGAGCTTGGTGACTCTGCTGTGTATTTCTGTGCCAGCAGCGATTCGATCCTCTATGGCTACACCTTCGGTTCG	CASSDSILYGYTF	7	6.20782e-05	TCRBV03	unknown	TCRBJ01-02*01
CTGACTGTGAGCAACATGAGCCCTGAAGACAGCAGCATATATCTCTGCAGCGCCGGACGGGGGAACACTGAAGCTTTCTTTGGACAA	CSAGRGNTEAFF	7	6.20782e-05	TCRBV29-01*01	TCRBD02-01*01	TCRBJ01-01*01
GTGACCAGTGCCCATCCTGAAGACAGCAGCTTCTACATCTGCAGTGCTAGAGGGCGGCAGGGGGCAGGGGAGCAGTACTTCGGGCCG	CSARGRQGAGEQYF	7	6.20782e-05	TCRBV20	TCRBD01-01*01	TCRBJ02-07*01
GAGCTGAATGTGAACGCCTTGGAGCTGGACGACTCGGCCCTGTATCTCTGTGCCAGCAGCCGCCAAGAGACCCAGTACTTCGGGCCA	CASSRQETQYF	7	6.20782e-05	TCRBV05-04*01	TCRBD02-01	TCRBJ02-05*01
GAGCTGAATGTGAACGCCTTGGAGCTGGACGACTCGGCCCTGTATCTCTGTGCCAGCGGAGAGAACACTGAAGCTTTCTTTGGACAA	CASGENTEAFF	7	6.20782e-05	TCRBV05-04*01	TCRBD02-01*02	TCRBJ01-01*01
CTGAGCTCTCTGGAGCTGGGGGACTCAGCTTTGTATTTCTGTGCCAGCAGCGTAGCTCCGGGGGATACTGAAGCTTTCTTTGGACAA	CASSVAPGDTEAFF	7	6.20782e-05	TCRBV09-01	TCRBD02-01*01	TCRBJ01-01*01
ATCCAGCCCTCAGAACCCAGGGACTCAGCTGTGTACTTCTGTGCCAGCAGTTTGGCAGGGAGTCGCACTGAAGCTTTCTTTGGACAA	CASSLAGSRTEAFF	7	6.20782e-05	TCRBV12	unknown	TCRBJ01-01*01
TTGGAGTCGGCTGCTCCCTCCCAAACATCTGTGTACTTCTGTGCCAGCAGTTTTGGCGGGAACTTCTACGAGCAGTACTTCGGGCCG	CASSFGGNFYEQYF	7	6.20782e-05	TCRBV06	TCRBD02-01*02	TCRBJ02-07*01
ATCCGGTCCACAAAGCTGGAGGACTCAGCCATGTACTTCTGTGCCAGCACCGAAGGACTCCCCCAAGATACGCAGTATTTTGGCCCA	CASTEGLPQDTQYF	7	6.20782e-05	TCRBV02-01*01	TCRBD02-01	TCRBJ02-03*01
CTGAATGTGAACGCCTTGTTGCTGGGGGACTCGGCCCTCTATCTCTGTGCCAGCAGCTTGTGGGGTTACGAGCAGTACTTCGGGCCG	CASSLWGYEQYF	7	6.20782e-05	TCRBV05-06*01	unknown	TCRBJ02-07*01
CAGCAGGTAGTGCGAGGAGATTCGGCAGCTTATTTCTGTGCCAGCTCACCAAGGGGCGGGGGGAACTACGAGCAGTACTTCGGGCCG	CASSPRGGGNYEQYF	7	6.20782e-05	TCRBV18-01*01	TCRBD02-01*01	TCRBJ02-07*01
GCTCCCTCCCAGACATCTGTGTACTTCTGTGCCAGCAGTTACATCAACCCAGGGGGCAGGGCTGGAAACACCATATATTTTGGAGAG	CASSYINPGGRAGNTIYF	7	6.20782e-05	TCRBV06	TCRBD01-01*01	TCRBJ01-03*01
CACGCCCTGCAGCCAGAAGACTCAGCCCTGTATCTCTGCGCCAGCAGCCAAGAGCAGGATTATATGTCACCCCTCCACTTTGGGAAC	CASSQEQDYMSPLHF	7	6.20782e-05	TCRBV04-01*01	TCRBD01-01*01	TCRBJ01-06*01
CAGCCCTCAGAACCCAGGGACTCAGCTGTGTACTTCTGTGCCAGCAGACCCACTAGCGGGGGTTACAATGAGCAGTTCTTCGGGCCA	CASRPTSGGYNEQFF	7	6.20782e-05	TCRBV12	TCRBD02-01*01	TCRBJ02-01*01
ACCAGTGCCCATCCTGAAGACAGCAGCTTCTACATCTGCAGTGCTAGGGGACAGGGGCGGGCGATCTACGAGCAGTACTTCGGGCCG	CSARGQGRAIYEQYF	7	6.20782e-05	TCRBV20	TCRBD01-01*01	TCRBJ02-07*01
CTGGAGTCGCCCAGCCCCAACCAGACCTCTCTGTACTTCTGTGCCACCAAACCTGAGATATCAGGGCAGCCCCAGCATTTTGGTGAT	CATKPEISGQPQHF	7	6.20782e-05	TCRBV27-01*01	TCRBD01-01*01	TCRBJ01-05*01
ATCCAGCCTGCAAAGCTTGAGGACTCGGCCGTGTATCTCTGTGCCAGCAGCTTAGAGCCTCTCGGCGGTGAGCAGTTCTTCGGGCCA	CASSLEPLGGEQFF	7	6.20782e-05	TCRBV11-02*02	TCRBD02-01	TCRBJ02-01*01
ACTCTGGAGTCTGCTGCCTCCTCCCAGACATCTGTATATTTCTGCGCCAGCAGTCTAACAGGGGGATCTGGCTACACCTTCGGTTCG	CASSLTGGSGYTF	7	6.20782e-05	TCRBV10-01	TCRBD01-01*01	TCRBJ01-02*01
ATCCAGCGCACACAGCAGGAGGACTCGGCCGTGTATCTCTGTGCCAGCAGCCCAGACTACTCCACAGATACGCAGTATTTTGGCCCA	CASSPDYSTDTQYF	7	6.20782e-05	TCRBV07-02*01	TCRBD02-01	TCRBJ02-03*01
ACCAGTGCCCATCCTGAAGACAGCAGCTTCTACATCTGCAGTGCTAGGGTTGGCGGGGGGGCCAAAGAGACCCAGTACTTCGGGCCA	CSARVGGGAKETQYF	7	6.20782e-05	TCRBV20	TCRBD02-01*01	TCRBJ02-05*01
CTGACGATCCAGCGCACACAGCAGGAGGACTCGGCCGTGTATCTCTGTGCCAGCAGCTTAGCGCTAGATACGCAGTATTTTGGCCCA	CASSLALDTQYF	7	6.20782e-05	TCRBV07-02*01	unknown	TCRBJ02-03*01
ATGAGCTCCTTGGAGCTGGGGGACTCAGCCCTGTACTTCTGTGCCAGCAGCTCCGCCAGCGGGGGAAACATTCAGTACTTCGGCGCC	CASSSASGGNIQYF	7	6.20782e-05	TCRBV13-01*01	TCRBD02-01*01	TCRBJ02-04*01
AAGATCCGGTCCACAAAGCTGGAGGACTCAGCCATGTACTTCTGTGCCAGAACCCCGGCTAGAGAAGAGACCCAGTACTTCGGGCCA	CARTPAREETQYF	7	6.20782e-05	TCRBV02-01*01	TCRBD02-01	TCRBJ02-05*01
ATCCGCTCACCAGGCCTGGGGGACGCAGCCATGTACCTGTGTGCCACCAGCAGAGTGACTAGCTTCGATACGCAGTATTTTGGCCCA	CATSRVTSFDTQYF	7	6.20782e-05	TCRBV15-01*01	TCRBD02-01	TCRBJ02-03*01
GCTGCTCCCTCCCAGACATCTGTGTACTTCTGTGCCAGCATCTACCTCGGAGCAGGGTCCCTCTACAATGAGCAGTTCTTCGGGCCA	CASIYLGAGSLYNEQFF	7	6.20782e-05	TCRBV06	TCRBD01-01*01	TCRBJ02-01*01
AAGATCCAGCCCTCAGAACCCAGGGACTCAGCTGTGTACTTCTGTGCCAGCAGTTTGGGGCGCAATCAGCCCCAGCATTTTGGTGAT	CASSLGRNQPQHF	7	6.20782e-05	TCRBV12	TCRBD01-01*01	TCRBJ01-05*01
AGGCTGCTGTCGGCTGCTCCCTCCCAGACATCTGTGTACTTCTGTGCCAGCAGTTACTATCAGGGTACTGAAGCTTTCTTTGGACAA	CASSYYQGTEAFF	7	6.20782e-05	TCRBV06-05*01	TCRBD01-01*01	TCRBJ01-01*01
ACGATCCAGCGCACACAGCAGGAGGACTCGGCCGTGTATCTCTGTGCCAGCAGCTTAGGACCCTCAACTGAAGCTTTCTTTGGACAA	CASSLGPSTEAFF	7	6.20782e-05	TCRBV07-02*01	unknown	TCRBJ01-01*01
CTGGAGTCGGCTGCTCCCTCCCAGACATCTGTGTACTTCTGTGCCAGCAGCACAGGGATTGGTAACTATGGCTACACCTTCGGTTCG	CASSTGIGNYGYTF	7	6.20782e-05	TCRBV06-01*01	TCRBD01-01*01	TCRBJ01-02*01
CTCACTGTGACATCGGCCCAAAAGAACCCGACAGCTTTCTATCTCTGTGCCAGTAGGATAAGCGGAGATACGCAGTATTTTGGCCCA	CASRISGDTQYF	7	6.20782e-05	TCRBV19-01	TCRBD02-01	TCRBJ02-03*01
CACGCCCTGCAGCCAGAAGACTCAGCCCTGTATCTCTGCGCCAGCAGCCACGGGACTAGCGGCACAGATACGCAGTATTTTGGCCCA	CASSHGTSGTDTQYF	7	6.20782e-05	TCRBV04-01*01	TCRBD02-01	TCRBJ02-03*01
CAGCAGGTAGTGCGAGGAGATTCGGCAGCTTATTTCTGTGCCAGCTCGTCGGGACAACAGGCTGGAAACACCATATATTTTGGAGAG	CASSSGQQAGNTIYF	7	6.20782e-05	TCRBV18-01*01	TCRBD01-01*01	TCRBJ01-03*01
AAGATCCGGTCCACAAAGCTGGAGGACTCAGCCATGTACTTCTGTGCCAGCAGGGACCCAGGGAAGGCTGGCTACACCTTCGGTTCG	CASRDPGKAGYTF	7	6.20782e-05	TCRBV02-01*01	TCRBD01-01*01	TCRBJ01-02*01
GTGAACGCCTTGTTGCTGGGGGACTCGGCCCTCTATCTCTGTGCCAGCAGCTTTTGGGTCGATAATTCACCCCTCCACTTTGGGAAC	CASSFWVDNSPLHF	7	6.20782e-05	TCRBV05-06*01	unknown	TCRBJ01-06*01
CGCACACAGCAGGAGGACTCCGCCGTGTATCTCTGTGCCAGCAGCCTGAGACAGGGGTTCTCTGGAAACACCATATATTTTGGAGAG	CASSLRQGFSGNTIYF	7	6.20782e-05	TCRBV07-08*01	TCRBD01-01*01	TCRBJ01-03*01
ACCAGTGCCCATCCTGAAGACAGCAGCTTCTACATCTGCAGTGCTAACCTACAGGGCCTAGCTAACTATGGCTACACCTTCGGTTCG	CSANLQGLANYGYTF	7	6.20782e-05	TCRBV20	TCRBD01-01*01	TCRBJ01-02*01
TCAGAACCCAGGGACTCAGCTGTGTACTTCTGTGCCAGCAGTTTTCACAGGGGAGGAGGGAACACCGGGGAGCTGTTTTTTGGAGAA	CASSFHRGGGNTGELFF	7	6.20782e-05	TCRBV12	TCRBD01-01*01	TCRBJ02-02*01
CAGCGCACACAGCAGGAGGACTCGGCCGTGTATCTCTGTGCCAGCAGCGTCCTAGGGACTAGCGGCTACGAGCAGTACTTCGGGCCG	CASSVLGTSGYEQYF	7	6.20782e-05	TCRBV07-02*01	TCRBD02-01	TCRBJ02-07*01
CACACCCTGCAGCCAGAAGACTCGGCCCTGTATCTCTGCGCCAGCAGCCGAGGGGGGAGCTCCTACAATGAGCAGTTCTTCGGGCCA	CASSRGGSSYNEQFF	7	6.20782e-05	TCRBV04-03*01	unknown	TCRBJ02-01*01
AGCAACATGAGCCCTGAAGACAGCAGCATATATCTCTGCAGCGTTGTATACGGGAGCTCTGGGGCCAACGTCCTGACTTTCGGGGCC	CSVVYGSSGANVLTF	7	6.20782e-05	TCRBV29-01*01	TCRBD02-01*02	TCRBJ02-06*01
CTGAGCTCTCTGGAGCTGGGGGACTCAGCTTTGTATTTCTGTGCCAGCAGCGTAGCACCCGTCTCGGACGAGCAGTACTTCGGGCCG	CASSVAPVSDEQYF	7	6.20782e-05	TCRBV09-01	TCRBD02-01	TCRBJ02-07*01
AGGATCCAGCAGGTAGTGCGAGGAGATTCGGCAGCTTATTTCTGTGCCAGCTCACCCTTCGAGTCGCACGAGCAGTACTTCGGGCCG	CASSPFESHEQYF	7	6.20782e-05	TCRBV18-01*01	TCRBD02-01*02	TCRBJ02-07*01
TCTGCCATCCCCAACCAGACAGCTCTTTACTTCTGTGCCACCAGCCGCGGGGGACAGGGTGGAGCCGGGGAGCTGTTTTTTGGAGAA	CATSRGGQGGAGELFF	7	6.20782e-05	TCRBV24	TCRBD01-01*01	TCRBJ02-02*01
AGCACCTTGGAGCTGGGGGACTCGGCCCTTTATCTTTGCGCCAGCAACCGCGGGGGGAACTCCTACAATGAGCAGTTCTTCGGGCCA	CASNRGGNSYNEQFF	7	6.20782e-05	TCRBV05-01*01	TCRBD02-01*01	TCRBJ02-01*01
ACCTTGGAGATCCAGTCCACGGAGTCAGGGGACACAGCACTGTATTTCTGTGCCAGCAGCAACAACTACGAGCAGTACTTCGGGCCG	CASSNNYEQYF	7	6.20782e-05	TCRBV21-01*01	TCRBD01-01*01	TCRBJ02-07*01
CTGCTGTCGGCTGCTCCCTCCCAGACATCTGTGTACTTCTGTGCCAGCAGTAACTGGGGGGGGCAAACTGAAGCTTTCTTTGGACAA	CASSNWGGQTEAFF	7	6.20782e-05	TCRBV06-05*01	TCRBD02-01*01	TCRBJ01-01*01
CTGAGCTCTCTGGAGCTGGGGGACTCAGCTTTGTATTTCTGTGCCAGCAGCGTAGGTTCAGGGGACTATGGCTACACCTTCGGTTCG	CASSVGSGDYGYTF	7	6.20782e-05	TCRBV09-01	TCRBD01-01*01	TCRBJ01-02*01
AACGCCTTGGAGCTGGACGACTCGGCCCTGTATCTCTGTGCCAGCAGCTTTAAGGGAGCGGGCACAGATACGCAGTATTTTGGCCCA	CASSFKGAGTDTQYF	7	6.20782e-05	TCRBV05-04*01	TCRBD02-01	TCRBJ02-03*01
GAGATCCAGCGCACAGAGCAGGGGGACTCGGCCATGTATCTCTGTGCCAGCAGTCCCAAGGGACCCTACGAGCAGTACTTCGGGCCG	CASSPKGPYEQYF	7	6.20782e-05	TCRBV07-09	unknown	TCRBJ02-07*01
AGCAACATGAGCCCTGAAGACAGCAGCATATATCTCTGCAGCGCCACGTGGGGGAGGGGGCAGGTGGATACGCAGTATTTTGGCCCA	CSATWGRGQVDTQYF	7	6.20782e-05	TCRBV29-01*01	unknown	TCRBJ02-03*01
ATCCAGCAGGTAGTGCGAGGAGATTCGGCAGCTTATTTCTGTGCCAGCTCACCACAAAAGATCACCGGGGAGCTGTTTTTTGGAGAA	CASSPQKITGELFF	7	6.20782e-05	TCRBV18-01*01	unknown	TCRBJ02-02*01
ACAGTGACCAGTGCCCATCCTGAAGACAGCAGCTTCTACATCTGCAGTGCTGGACAGGCATCTAATGAAAAACTGTTTTTTGGCAGT	CSAGQASNEKLFF	7	6.20782e-05	TCRBV20	TCRBD01-01*01	TCRBJ01-04*01
ACTCTGACTGTGAGCAACATGAGCCCTGAAGACAGCAGCATATATCTCTGCAGCGTTGAAGAAACGTCTGACGCTTTCTTTGGACAA	CSVEETSDAFF	7	6.20782e-05	TCRBV29-01*01	unknown	TCRBJ01-01*01
CAGCCCTCAGAACCCAGGGACTCAGCTGTGTACTTCTGTGCCAGCAGTCCTGGGGGCGTGATGAACACTGAAGCTTTCTTTGGACAA	CASSPGGVMNTEAFF	7	6.20782e-05	TCRBV12	TCRBD01-01*01	TCRBJ01-01*01
AAGATCCAGCGCACACAGCAGGAGGACTCCGCCGTGTATCTCTGTGCCAGCAGCCTGGGACTAGCGGAGACCCAGTACTTCGGGCCA	CASSLGLAETQYF	7	6.20782e-05	TCRBV07-08*01	TCRBD02-01	TCRBJ02-05*01
CTGAGCTCTCTGGAGCTGGGGGACTCAGCTTTGTATTTCTGTGCCAGCAGCGCTCTTCGTAGCGGGGATACGCAGTATTTTGGCCCA	CASSALRSGDTQYF	7	6.20782e-05	TCRBV09-01	TCRBD02-01	TCRBJ02-03*01
ATCCAGCGCACAGAGCAGGGGGACTCGGCCATGTATCTCTGTGCCAGCAGCACGGCGGTCGCTAGTCAGCCCCAGCATTTTGGTGAT	CASSTAVASQPQHF	7	6.20782e-05	TCRBV07-09	TCRBD02-01	TCRBJ01-05*01
CAGCGCACACAGCAGGAGGACTCGGCCGTGTATCTCTGTGCCAGCAGCTTAGTCCTAGCGGGGGCAGGTGAGCAGTTCTTCGGGCCA	CASSLVLAGAGEQFF	7	6.20782e-05	TCRBV07-02*01	TCRBD02-01*01	TCRBJ02-01*01
CTCAAGATCCAGCCTGCAGAGCTTGGGGACTCGGCCGTGTATCTCTGTGCCAGCAGCTCAGTCACCGGGGAGCTGTTTTTTGGAGAA	CASSSVTGELFF	7	6.20782e-05	TCRBV11-03*01	TCRBD01-01*01	TCRBJ02-02*01
CTGACAGTGACCAGTGCCCATCCTGAAGACAGCAGCTTCTACATCTGCAGTGCTAGAGGTGGGGCCTATGGCTACACCTTCGGTTCG	CSARGGAYGYTF	7	6.20782e-05	TCRBV20	TCRBD01-01*01	TCRBJ01-02*01
CAGCGCACACAGCAGGAGGACTCGGCCGTGTATCTCTGTGCCAGCAGCTTAGTGGGGACTGCGGTAGAGACCCAGTACTTCGGGCCA	CASSLVGTAVETQYF	7	6.20782e-05	TCRBV07-02*01	TCRBD02-01	TCRBJ02-05*01
AGCTCTCTGGAGCTGGGGGACTCAGCTTTGTATTTCTGTGCCAGCAGCGTCCGACAAGGGGGGAACAATGAGCAGTTCTTCGGGCCA	CASSVRQGGNNEQFF	7	6.20782e-05	TCRBV09-01	unknown	TCRBJ02-01*01
AGGATCCAGCAGGTAGTGCGAGGAGATTCGGCAGCTTATTTCTGTGCCAGCTCATTGGACTTGAACACTGAAGCTTTCTTTGGACAA	CASSLDLNTEAFF	7	6.20782e-05	TCRBV18-01*01	TCRBD02-01	TCRBJ01-01*01
AACGCCTTGTTGCTGGGGGACTCGGCCCTGTATCTCTGTGCCAGCAGACCCCGGACAAACTCTGGAAACACCATATATTTTGGAGAG	CASRPRTNSGNTIYF	7	6.20782e-05	TCRBV05-05*01	TCRBD01-01*01	TCRBJ01-03*01
CTGGAGTTGGCTGCTCCCTCCCAGACATCTGTGTACTTCTGTGCCAGCGACGACAGGGTCGGGAACACTGAAGCTTTCTTTGGACAA	CASDDRVGNTEAFF	7	6.20782e-05	TCRBV06-06	TCRBD01-01*01	TCRBJ01-01*01
ACCCTGCAGCCAGAAGACTCGGCCCTGTATCTCTGCGCCAGCAGCCAAGATCAAGGGACCGGGGCCAACGTCCTGACTTTCGGGGCC	CASSQDQGTGANVLTF	7	6.20782e-05	TCRBV04-03*01	unknown	TCRBJ02-06*01
ACGATCCAGCGCACACAGCAGGAGGACTCGGCCGTGTATCTCTGTGCCAGCAGCTTCTCCTCTGGAAACACCATATATTTTGGAGAG	CASSFSSGNTIYF	7	6.20782e-05	TCRBV07-02*01	TCRBD02-01	TCRBJ01-03*01
TCACCAGGCCTGGGGGACGCAGCCATGTACCTGTGTGCCACCAGCCGGCGTAGACAGACCTCTGGAAACACCATATATTTTGGAGAG	CATSRRRQTSGNTIYF	7	6.20782e-05	TCRBV15-01*01	TCRBD01-01*01	TCRBJ01-03*01
CTGGAGTCTGCCAGGCCCTCACATACCTCTCAGTACCTCTGTGCCAGCAGTGAATACCCACGACTCTATGGCTACACCTTCGGTTCG	CASSEYPRLYGYTF	7	6.20782e-05	TCRBV25-01*01	TCRBD02-01	TCRBJ01-02*01
GTGAGCACCTTGGAGCTGGGGGACTCGGCCCTTTATCTTTGCGCCAGCAGCTTGAACGCAGGGACAAACACCATATATTTTGGAGAG	CASSLNAGTNTIYF	7	6.20782e-05	TCRBV05-01*01	unknown	TCRBJ01-03*01
CTCAGGCTGCTGTCGGCTGCTCCCTCCCAGACATCTGTGTACTTCTGTGCCAGCCAACCTGGGCCCGGGGCGAAGTACTTCGGGCCG	CASQPGPGAKYF	7	6.20782e-05	TCRBV06-05*01	unknown	TCRBJ02-07*01
CGCACAGAGCGGGGGGACTCAGCCGTGTATCTCTGTGCCAGCAGCTTACTCGGGACAGGGAATAATTCACCCCTCCACTTTGGGAAC	CASSLLGTGNNSPLHF	7	6.20782e-05	TCRBV07-03*01	TCRBD01-01*01	TCRBJ01-06*01
GAGTCGGCTGCTCCCTCCCAGACATCTGTGTACTTCTGTGCCAGCAGTGTTGGCCCAGGGGGAAATCAGCCCCAGCATTTTGGTGAT	CASSVGPGGNQPQHF	7	6.20782e-05	TCRBV06-01*01	TCRBD01-01*01	TCRBJ01-05*01
AAGGAATCCTTTCCTCTCACTGTGACATCGGCCCAAAAGAACCCAGGGGTTCAAGGCTCCTATAATTCACCCCTCCACTTTGGGAAC	YNSPLHF	7	6.20782e-05	TCRBV19-01	TCRBD01-01*01	TCRBJ01-06*01
GTGACCAGTGCCCATCCTGAAGACAGCAGCTTCTACATCTGCAGTGCTAGACTAGCGGGGGGGCAAGAGACCCAGTACTTCGGGCCA	CSARLAGGQETQYF	7	6.20782e-05	TCRBV20	TCRBD02-01*01	TCRBJ02-05*01
ACGATCCAGCGCACAGAGCAGCGGGACTCGGCCATGTATCGCTGTGCCAGCAGCCCGAATTGGGGAGAGACCCAGTACTTCGGGCCA	CASSPNWGETQYF	7	6.20782e-05	TCRBV07-06*01	unknown	TCRBJ02-05*01
CTGGAGTCGGCTGCTCCCTCCCAGACATCTGTGTACTTCTGTGCCAGCAGTGAAGTCACAGGGAGCAATGAGCAGTTCTTCGGGCCA	CASSEVTGSNEQFF	7	6.20782e-05	TCRBV06-01*01	TCRBD01-01*01	TCRBJ02-01*01
GAGTCCGCCAGCACCAACCAGACATCTATGTACCTCTGTGCCAGCAGTTTATTGGCCGGGGTTCGGGAAAAACTGTTTTTTGGCAGT	CASSLLAGVREKLFF	7	6.20782e-05	TCRBV28-01*01	TCRBD02-01*01	TCRBJ01-04*01
ACAGAGCAGGGGGACTCAGCCGTGTATCTCCGTGCCAGCAGCTTAATCGACAGGGGTTCGGTAGGTGAAAAACTGTTTTTTGGCAGT	RASSLIDRGSVGEKLFF	7	6.20782e-05	TCRBV07-03*02	TCRBD01-01*01	TCRBJ01-04*01
CTGTCGGCTGCTCCCTCCCAGACATCTGTGTACTTCTGTGCCAGCACCCTAGCCCCAAGCGGGTCCTACGAGCAGTACTTCGGGCCG	CASTLAPSGSYEQYF	7	6.20782e-05	TCRBV06-05*01	TCRBD02-01	TCRBJ02-07*01
GCCTTGGAGCTGGACGACTCGGCCCTGTATCTCTGTGCCAGCAGCCATCCGGGACAGGGGAACACCGGGGAGCTGTTTTTTGGAGAA	CASSHPGQGNTGELFF	7	6.20782e-05	TCRBV05-04*01	TCRBD01-01*01	TCRBJ02-02*01
ACATCGGCCCAAAAGAACCCGACAGCTTTCTATCTCTGTGCCAGCTCGACGGAACAGGGGGCGTTTGAAAAACTGTTTTTTGGCAGT	CASSTEQGAFEKLFF	7	6.20782e-05	TCRBV19-01	TCRBD01-01*01	TCRBJ01-04*01
ACCCTGGAGTCTGCCAGGCCCTCACATACCTCTCAGTACCTCTGTGCCAGCGGACGGACAGGGGACTACGAGCAGTACTTCGGGCCG	CASGRTGDYEQYF	7	6.20782e-05	TCRBV25-01*01	TCRBD01-01*01	TCRBJ02-07*01
CTGGAGTCCGCCAGCACCAACCAGACATCTATGTACCTCTGTGCCAGCAGCTTACGACTAGCACCTGATACGCAGTATTTTGGCCCA	CASSLRLAPDTQYF	7	6.20782e-05	TCRBV28-01*01	TCRBD02-01	TCRBJ02-03*01
ACCTTGGAGCTGGGGGACTCGGCCCTTTATCTTTGCGCCAGCATCCCACTTCCAGGGGACTCAGGGTTCGGCTACACCTTCGGTTCG	CASIPLPGDSGFGYTF	7	6.20782e-05	TCRBV05-01*01	unknown	TCRBJ01-02*01
ACAGTGACCAGTGCCCATCCTGAAGACAGCAGCTTCTACATCTGCAGTGCTCCGTCTAGGGGCGGAAAGACCCAGTACTTCGGGCCA	CSAPSRGGKTQYF	7	6.20782e-05	TCRBV20	TCRBD01-01*01	TCRBJ02-05*01
CGGTCCACAAAGCTGGAGGACTCAGCCATGTACTTCTGTGCCATCAGCCGAGGGGCGAGTAGAAATCAGCCCCAGCATTTTGGTGAT	CAISRGASRNQPQHF	7	6.20782e-05	TCRBV02-01*01	unknown	TCRBJ01-05*01
CTGGAGTCGGCTGCTCCCTCCCAGACATCTGTGTACTTCTGTGCCAGCACGCTGGACAGGTCATCTTACGAGCAGTACTTCGGGCCG	CASTLDRSSYEQYF	7	6.20782e-05	TCRBV06-01*01	TCRBD01-01*01	TCRBJ02-07*01
TTGGCGTCTGCTGTACCCTCTCAGACATCTGTGTACTTCTGTGCCAGCAGTGACTCGGGGGTATCAGATACGCAGTATTTTGGCCCA	CASSDSGVSDTQYF	7	6.20782e-05	TCRBV06-04	unknown	TCRBJ02-03*01
ACTCTCAAGATCCAGCCTGCAAAGCTTGAGGACTCGGCCGTGTATCTCTGTGCCAGCAGCTTAGTCGCTGAAGCTTTCTTTGGACAA	CASSLVAEAFF	7	6.20782e-05	TCRBV11-02*02	TCRBD02-01	TCRBJ01-01*01
ATCCAGCAGGTAGTGCGAGGAGATTCGGCAGCTTATTTCTGTGCCAGCTCACCAACCAGGACAGCTACTGAAGCTTTCTTTGGACAA	CASSPTRTATEAFF	7	6.20782e-05	TCRBV18-01*01	TCRBD01-01*01	TCRBJ01-01*01
GCCCATCCTGAAGACAGCAGCTTCTACATCTGCAGTGCTAGTGAGGGGGACAACGCCCTCTGGAATGAAAAACTGTTTTTTGGCAGT	CSASEGDNALWNEKLFF	7	6.20782e-05	TCRBV20	TCRBD01-01*01	TCRBJ01-04*01
GTGACATCGGCCCAAAAGAACCCGACAGCTTTCTATCTCTGTGCCAGTAGTGCGGGACACCTGAACACTGAAGCTTTCTTTGGACAA	CASSAGHLNTEAFF	7	6.20782e-05	TCRBV19-01	unknown	TCRBJ01-01*01
AACATGAGCCCTGAAGACAGCAGCATATATCTCTGCAGCGTTTTGGGTTTGAGGGGACAGACTTATTATGGCTACACCTTCGGTTCG	CSVLGLRGQTYYGYTF	7	6.20782e-05	TCRBV29-01*01	TCRBD01-01*01	TCRBJ01-02*01
TCTCTGGAGCTGGGGGACTCAGCTTTGTATTTCTGTGCCAGCAGCGTAGAAGGGACAGGGGGATCCTACGAGCAGTACTTCGGGCCG	CASSVEGTGGSYEQYF	7	6.20782e-05	TCRBV09-01	TCRBD01-01*01	TCRBJ02-07*01
CTGACGATCCAGCGCACACAGCAGGAGGACTCGGCCGTGTATCTCTGTGCCAGCAGCCCCGGGCCCCACGAGCAGTACTTCGGGCCG	CASSPGPHEQYF	7	6.20782e-05	TCRBV07-02*01	unknown	TCRBJ02-07*01
AGTGCCCATCCTGAAGACAGCAGCTTCTACATCTGCAGTGCCCCTAGTATGGGGAGGGGGGCTAACTATGGCTACACCTTCGGTTCG	CSAPSMGRGANYGYTF	7	6.20782e-05	TCRBV20	TCRBD02-01*02	TCRBJ01-02*01
CGGTCCACAAAGCTGGAGGACTCAGCCATGTACTTCTGTGCCAGCAGTGAAAAAGGTGTGGTAACCGGGGAGCTGTTTTTTGGAGAA	CASSEKGVVTGELFF	7	6.20782e-05	TCRBV02-01*01	unknown	TCRBJ02-02*01
GACATCCGCTCACCAGGCCTGGGGGACGCAGCCATGTACCTGTGTGCCACCAGCAGAGATGGGTTCCGGGAGCTGTTTTTTGGAGAA	CATSRDGFRELFF	7	6.20782e-05	TCRBV15-01*01	unknown	TCRBJ02-02*01
ACGATCCAGCGCACACAGCAGGAGGACTCGGCCGTGTATCTCTGTGCCAGCAGACTGGAGGACACCGGGGAGCTGTTTTTTGGAGAA	CASRLEDTGELFF	7	6.20782e-05	TCRBV07-02*01	TCRBD02-01*02	TCRBJ02-02*01
CTGAGCTCTCTGGAGCTGGGGGACTCAGCTTTGTATTTCTGTGCCAGCAGCGTAGACAGGGCAGCGGATGGCTACACCTTCGGTTCG	CASSVDRAADGYTF	7	6.20782e-05	TCRBV09-01	TCRBD01-01*01	TCRBJ01-02*01
CTGAGCTCTCTGGAGCTGGGGGACTCAGCTTTGTATTTCTGTGCCAGCAGCGACTTACAGGGGGCGAATGGCTACACCTTCGGTTCG	CASSDLQGANGYTF	7	6.20782e-05	TCRBV09-01	TCRBD01-01*01	TCRBJ01-02*01
ATCCGGTCCACAAAGCTGGAGGACTCAGCCATGTACTTCTGTGCCAGCAGAACGACAGGGGGGGATTCACCCCTCCACTTTGGGAAC	CASRTTGGDSPLHF	7	6.20782e-05	TCRBV02-01*01	TCRBD01-01*01	TCRBJ01-06*01
CACACCCTGCAGCCAGAAGACTCGGCCCTGTATCTCTGCGCCAGCAGCCACTACAGGGAGGACACCGGGGAGCTGTTTTTTGGAGAA	CASSHYREDTGELFF	7	6.20782e-05	TCRBV04-03*01	unknown	TCRBJ02-02*01
TCCTCAGAACCGGGAGACACGGCACTGTATCTCTGCGCCAGCAGTCAGCTAGGGCGGCATAATAATTCACCCCTCCACTTTGGGAAC	CASSQLGRHNNSPLHF	7	6.20782e-05	TCRBV23-01*01	unknown	TCRBJ01-06*01
CTGAATGTGAACGCCTTGGAGCTGGACGACTCGGCCCTGTATCTCTGTGCCAGCAGCTTTGACAGCACTGAAGCTTTCTTTGGACAA	CASSFDSTEAFF	7	6.20782e-05	TCRBV05-04*01	TCRBD01-01*01	TCRBJ01-01*01
TTGGAGCTGGGGGACTCGGCCCTTTATCTTTGCGCCAGCAGCTTGGTGGCTAGCGGGGGGGTCTACAATGAGCAGTTCTTCGGGCCA	CASSLVASGGVYNEQFF	7	6.20782e-05	TCRBV05-01*01	TCRBD02-01*01	TCRBJ02-01*01
GAGCTGGGGGACTCGGCCCTTTATCTTTGCGCCAGCAGCTGGGCCACAGGGGGCAGTATCATGAACACTGAAGCTTTCTTTGGACAA	CASSWATGGSIMNTEAFF	7	6.20782e-05	TCRBV05-01*01	TCRBD01-01*01	TCRBJ01-01*01
ACTCTGGAGTCCGCTACCAGCTCCCAGACATCTGTGTACTTCTGTGCCATCAACGGCAGGGAGGGCTACGAGCAGTACTTCGGGCCG	CAINGREGYEQYF	7	6.20782e-05	TCRBV10-03*01	TCRBD02-01*02	TCRBJ02-07*01
ATCCAGCCTGCAAAGCTTGAGGACTCGGCCGTGTATCTCTGTGCCAGCAGCTTAGAATCGGGGGCGCGTGAGCAGTACTTCGGGCCG	CASSLESGAREQYF	7	6.20782e-05	TCRBV11-02*02	unknown	TCRBJ02-07*01
CGGTCCACAAAGCTGGAGGACTCAGCCATGTACTTCTGTGCCAGCAGTGAAGGTCGGGGAACCTATCAGCCCCAGCATTTTGGTGAT	CASSEGRGTYQPQHF	7	6.20782e-05	TCRBV02-01*01	TCRBD02-01*01	TCRBJ01-05*01
ACTCTGACTGTGAGCAACATGAGCCCTGAAGACAGCAGCATATATCTCTGCAGCGGGGGGAGGGACTATGGCTACACCTTCGGTTCG	CSGGRDYGYTF	7	6.20782e-05	TCRBV29-01*01	TCRBD02-01*02	TCRBJ01-02*01
ATCCAGCCCTCAGAACCCAGGGACTCAGCTGTGTACTTCTGTGCCAGCAGTTTAGACCGGACAGGGGTCGAGCAGTACTTCGGGCCG	CASSLDRTGVEQYF	7	6.20782e-05	TCRBV12	TCRBD01-01*01	TCRBJ02-07*01
GTGAACGCCTTGGAGCTGGACGACTCGGCCCTGTATCTCTGTGCCAGCAGCACGGACACTAGCACAGATACGCAGTATTTTGGCCCA	CASSTDTSTDTQYF	7	6.20782e-05	TCRBV05-04*01	TCRBD01-01*01	TCRBJ02-03*01
AAGATCCAGCCCTCAGAACCCAGGGACTCAGCTGTGTACTTCTGTGCCAGCAGTATAGCGGACTTCTACGAGCAGTACTTCGGGCCG	CASSIADFYEQYF	7	6.20782e-05	TCRBV12	TCRBD02-01	TCRBJ02-07*01
CAGCAGGTAGTGCGAGGAGATTCGGCAGCTTATTTCTGTGCCAGCTCACACGGGAAGGACAGGGGGCACGGCTACACCTTCGGTTCG	CASSHGKDRGHGYTF	7	6.20782e-05	TCRBV18-01*01	TCRBD01-01*01	TCRBJ01-02*01
TTGGCGTCTGCTGTACCCTCTCAGACATCTGTGTACTTCTGTGCCAGCAGTGATTTTTCCGGGGCTGTTAAGCAGTTCTTCGGGCCA	CASSDFSGAVKQFF	7	6.20782e-05	TCRBV06-04	unknown	TCRBJ02-01*01
ACTGTGACATCGGCCCAAAAGAACCCGACAGCTTTCTATCTCTGTGCCAGTAGTCCCAGGGAGGATTCACCCCTCCACTTTGGGAAC	CASSPREDSPLHF	7	6.20782e-05	TCRBV19-01	TCRBD02-01*02	TCRBJ01-06*01
CTCACTCTGGAGTCCGCTACCAGCTCCCAGACATCTGTGTACTTCTGTGCCATCAATAATGGAGGTCATGAGCAGTTCTTCGGGCCA	CAINNGGHEQFF	7	6.20782e-05	TCRBV10-03*01	TCRBD02-01*02	TCRBJ02-01*01
ATCCAGCCTGCAAAGCTTGAGGACTCGGCCGTGTATCTCTGTGCCAGCAGCGGCGCAGGCTCTGGAAACACCATATATTTTGGAGAG	CASSGAGSGNTIYF	7	6.20782e-05	TCRBV11-02*02	TCRBD01-01*01	TCRBJ01-03*01
TCCACTCTGACAGTGACCAGTGCCCATCCTGAAGACAGCAGCTTCTACATCTGCAGTGCCCATGGCCAAGGCTACACCTTCGGTTCG	CSAHGQGYTF	7	6.20782e-05	TCRBV20-01*01	TCRBD01-01*01	TCRBJ01-02*01
CAGCGCACACAGCAGGAGGACTCGGCCGTGTATCTCTGTGCCAGCAGCTCTGGGACAGGGGGCCGGAGTGAGCAGTTCTTCGGGCCA	CASSSGTGGRSEQFF	7	6.20782e-05	TCRBV07-02*01	TCRBD01-01*01	TCRBJ02-01*01
CGGTCCACAAAGCTGGAGGACTCAGCCATGTACTTCTGTGCCAGCAGAAAGGAGGGACTAGCGGGTGCTACCCAGTACTTCGGGCCA	CASRKEGLAGATQYF	7	6.20782e-05	TCRBV02-01*01	TCRBD02-01	TCRBJ02-05*01
AACGCCTTGTTGCTGGGGGACTCGGCCCTGTATCTCTGTGCCAGCAGCTTGCAGACTAGCGGGTTCTACGAGCAGTACTTCGGGCCG	CASSLQTSGFYEQYF	7	6.20782e-05	TCRBV05-05*01	TCRBD02-01	TCRBJ02-07*01
CAGCGCACAGAGCAGGGGGACTCGGCCATGTATCTCTGTGCCAGCAGCTGGGGGACTAGCGGGGGTGAGACCCAGTACTTCGGGCCA	CASSWGTSGGETQYF	7	6.20782e-05	TCRBV07-09	TCRBD02-01*01	TCRBJ02-05*01
AGGCTGCTGTCGGCTGCTCCCTCCCAGACATCTGTGTACTTCTGTGCCAGCAGTCGACAAAAAAATTCACCCCTCCACTTTGGGAAC	CASSRQKNSPLHF	7	6.20782e-05	TCRBV06-05*01	TCRBD01-01*01	TCRBJ01-06*01
GCTGCTCCCTCCCAAACATCTGTGTACTTCTGTGCCAGCAGTAACCTACCGGCTAGCGGGAACACAGATACGCAGTATTTTGGCCCA	CASSNLPASGNTDTQYF	7	6.20782e-05	TCRBV06	TCRBD02-01*02	TCRBJ02-03*01
CAGCGCACACAGCAGGAGGACTCGGCCGTGTATCTCTGTGCCAGCAGCTTACTCAGGAGCTCTGGAAACACCATATATTTTGGAGAG	CASSLLRSSGNTIYF	7	6.20782e-05	TCRBV07-02*01	unknown	TCRBJ01-03*01
GCCTTGGAGCTGGACGACTCGGCCCTGTATCTCTGTGCCAGCAGCCCGGGAGGGGGCTCGGCTAATGAAAAACTGTTTTTTGGCAGT	CASSPGGGSANEKLFF	7	6.20782e-05	TCRBV05-04*01	TCRBD02-01*02	TCRBJ01-04*01
AGGCTGGAGTTGGCTGCTCCCTCCCAGACATCTGTGTACTTCTGTGCCAGCAGCAACAGGGCTAACTATGGCTACACCTTCGGTTCG	CASSNRANYGYTF	7	6.20782e-05	TCRBV06-06	TCRBD01-01*01	TCRBJ01-02*01
CTACACACCCTGCAGCCAGAAGACTCGGCCCTGTATCTCTGTGCCAGCTCTAGCGGGGGGGCCGGGGAGACCCAGTACTTCGGGCCA	CASSSGGAGETQYF	7	6.20782e-05	TCRBV04-02*01	TCRBD02-01*01	TCRBJ02-05*01
CTCAAGATCCAGCCTGCAGAGCTTGGGGACTCGGCCGTGTATCTCTGTGCCAGCAGCTTATATGGGGGAGAGCAGTACTTCGGGCCG	CASSLYGGEQYF	7	6.20782e-05	TCRBV11-03*01	unknown	TCRBJ02-07*01
CTGGAGTCCGCCAGCACCAACCAGACATCTATGTACCTCTGTGCCAGCAGACCGCAACAGGGGAGTTCACCCCTCCACTTTGGGAAC	CASRPQQGSSPLHF	7	6.20782e-05	TCRBV28-01*01	TCRBD01-01*01	TCRBJ01-06*01
GAGATCCAGCGCACAGAGCAGGGGGACTCGGCCATGTATCTCTGTGCCAGCAGCTTAGAGGAATCGAACGGCTACACCTTCGGTTCG	CASSLEESNGYTF	7	6.20782e-05	TCRBV07-09	unknown	TCRBJ01-02*01
CGGTCCACAAAGCTGGAGGACTCAGCCATGTACTTCTGTGCCAGCAGTGAAGCCGGTCGGGGGCCCTATGGCTACACCTTCGGTTCG	CASSEAGRGPYGYTF	7	6.20782e-05	TCRBV02-01*01	unknown	TCRBJ01-02*01
ATCCGGTCCACAAAGCTGGAGGACTCAGCCATGTACTTCTGTGCCAGCAGTGAAACCGGGACTAGCTACGAGCAGTACTTCGGGCCG	CASSETGTSYEQYF	7	6.20782e-05	TCRBV02-01*01	TCRBD02-01	TCRBJ02-07*01
ATGAATGTGAGCACCTTGGAGCTGGGGGACTCGGCCCTTTATCTTTGCGCCAGCAGCTGGGACAGCTATGGCTACACCTTCGGTTCG	CASSWDSYGYTF	7	6.20782e-05	TCRBV05-01*01	TCRBD01-01*01	TCRBJ01-02*01
CAGCGCACACAGCAGGAGGACTCCGCCGTGTATCTCTGTGCCAGCAGCTTTAGCGGGGGAACCACCGGGGAGCTGTTTTTTGGAGAA	CASSFSGGTTGELFF	7	6.20782e-05	TCRBV07-08*01	TCRBD02-01*01	TCRBJ02-02*01
ACCTTGGAGCTGGGGGACTCGGCCCTTTATCTTTGCGCCAGCAGCTTACCGGGACAGGGGAAGGCCGGGGAGCTGTTTTTTGGAGAA	CASSLPGQGKAGELFF	7	6.20782e-05	TCRBV05-01*01	TCRBD01-01*01	TCRBJ02-02*01
AGCACCTTGGAGCTGGGGGACTCGGCCCTTTATCTTTGCGCCAGCAGCTTGGACAGGGGTGGTAACGGGGAGCTGTTTTTTGGAGAA	CASSLDRGGNGELFF	7	6.20782e-05	TCRBV05-01*01	TCRBD01-01*01	TCRBJ02-02*01
CGGTCCACAAAGCTGGAGGACTCAGCCATGTACTTCTGTGCCAGCAGTGGGGTGAGGGCGGGGGGTCAGCCCCAGCATTTTGGTGAT	CASSGVRAGGQPQHF	7	6.20782e-05	TCRBV02-01*01	TCRBD02-01*01	TCRBJ01-05*01
ATCCAGCCCTCAGAACCCAGGGACTCAGCTGTGTACTTCTGTGCCAGCAGGGGACAGGGGGCAGGGTACGAGCAGTACTTCGGGCCG	CASRGQGAGYEQYF	7	6.20782e-05	TCRBV12	TCRBD01-01*01	TCRBJ02-07*01
ATCCAGCCCTCAGAACCCAGGGACTCAGCTGTGTACTTCTGTGCCAGCAGTCCGGGACTTTCCTCCTACGAGCAGTACTTCGGGCCG	CASSPGLSSYEQYF	7	6.20782e-05	TCRBV12	TCRBD02-01	TCRBJ02-07*01
GTGAGCACCTTGGAGCTGGGGGACTCGGCCCTTTATCTTTGCGCCAGCAGCTTGGTGGGGAGCTCCTACGAGCAGTACTTCGGGCCG	CASSLVGSSYEQYF	7	6.20782e-05	TCRBV05-01*01	TCRBD02-01*02	TCRBJ02-07*01
CTGACAGTGACCAGTGCCCATCCTGAAGACAGCAGCTTCTACATCTGCAGTGCTAGAGCAGGGGACACTGAAGCTTTCTTTGGACAA	CSARAGDTEAFF	7	6.20782e-05	TCRBV20	TCRBD01-01*01	TCRBJ01-01*01
CTGGAGTCCGCTACCAGCTCCCAGACATCTGTGTACTTCTGTGCCATCAGTGAGGGAAGGGACGCTGAAAAACTGTTTTTTGGCAGT	CAISEGRDAEKLFF	7	6.20782e-05	TCRBV10-03*01	unknown	TCRBJ01-04*01
ACTCTGAAGATCCAGCCCTCAGAACCCAGGGACTCAGCTGTGTACTTCTGTGCCAGCAGCCTAGGATACGAGCAGTACTTCGGGCCG	CASSLGYEQYF	7	6.20782e-05	TCRBV12	TCRBD02-01	TCRBJ02-07*01
ACAGTGACCAGTGCCCATCCTGAAGACAGCAGCTTCTACATCTGCAGTGCTAGAGGGGGGCACCTAACTGAAGCTTTCTTTGGACAA	CSARGGHLTEAFF	7	6.20782e-05	TCRBV20	TCRBD01-01*01	TCRBJ01-01*01
GTGAGCACCTTGGAGCTGGGGGACTCGGCCCTTTATCTTTGCGCCAGCAGCCCACCGAGTACGCGCGACGAGCAGTACTTCGGGCCG	CASSPPSTRDEQYF	7	6.20782e-05	TCRBV05-01*01	TCRBD02-01	TCRBJ02-07*01
CTGAGCTCTCTGGAGCTGGGGGACTCAGCTTTGTATTTCTGTGCCAGCAGCGTAACCACAGGGACCTATGGCTACACCTTCGGTTCG	CASSVTTGTYGYTF	6	5.32099e-05	TCRBV09-01	TCRBD01-01*01	TCRBJ01-02*01
CTGACGATCCAGCGCACACAGCAGGAGGACTCGGCCGTGTATCTCTGTGCCAGCAGCTTATATGGGGGAGAGCAGTACTTCGGGCCG	CASSLYGGEQYF	6	5.32099e-05	TCRBV07-02*01	unknown	TCRBJ02-07*01
CGGTCCACAAAGCTGGAGGACTCAGCCATGTACTTCTGTGCCAGCAGTTCTACTAGGGGACCAAGGGGTGAAGCTTTCTTTGGACAA	CASSSTRGPRGEAFF	6	5.32099e-05	TCRBV02-01*01	unknown	TCRBJ01-01*01
GAGTCGCCCAGCCCCAACCAGACCTCTCTGTACTTCTGTGCCAGCAGTACACAGGGGGCCGTGGGTCAGCCCCAGCATTTTGGTGAT	CASSTQGAVGQPQHF	6	5.32099e-05	TCRBV27-01*01	TCRBD01-01*01	TCRBJ01-05*01
CAGCAGGTAGTGCGAGGAGATTCGGCAGCTTATTTCTGTGCCAGCTCACCGGGACACCTTAACACCGGGGAGCTGTTTTTTGGAGAA	CASSPGHLNTGELFF	6	5.32099e-05	TCRBV18-01*01	TCRBD01-01*01	TCRBJ02-02*01
CTGCTGTCGGCTGCTCCCTCCCAGACATCTGTGTACTTCTGTGCCAGCAGCTCCGGGACAGGGATTTCACCCCTCCACTTTGGGAAC	CASSSGTGISPLHF	6	5.32099e-05	TCRBV06-05*01	TCRBD01-01*01	TCRBJ01-06*01
ACGATCCAGCGCACACAGCAGGAGGACTCGGCCGTGTATCTCTGTGCCAGCAGCCCACAGAGGGGGAATGAGCAGTTCTTCGGGCCA	CASSPQRGNEQFF	6	5.32099e-05	TCRBV07-02*01	TCRBD01-01*01	TCRBJ02-01*01
GTGACATCGGCCCAAAAGAACCCGACAGCTTTCTATCTCTGTGCCAGTAGTATAGGTCGGGGAGGCGAGACCCAGTACTTCGGGCCA	CASSIGRGGETQYF	6	5.32099e-05	TCRBV19-01	TCRBD02-01*02	TCRBJ02-05*01
CTCACTCTGGAGTCTGCTGCCTCCTCCCAGACATCTGTATATTTCTGCGCCAGCAGTGAGGGGGGCTACGAGCAGTACTTCGGGCCG	CASSEGGYEQYF	6	5.32099e-05	TCRBV10-01	unknown	TCRBJ02-07*01
CGCACACAGCAGGAGGACTCCGCCGTGTATCTCTGTGCCAGCAGCTTGGCAGGGTATGTTAGCAATCAGCCCCAGCATTTTGGTGAT	CASSLAGYVSNQPQHF	6	5.32099e-05	TCRBV07-08*01	TCRBD01-01*01	TCRBJ01-05*01
ATCCAGCGCACAGAGCAGGGGGACTCGGCCATGTATCTCTGTGCCAGCAGGTACGGGGGGATGAACACTGAAGCTTTCTTTGGACAA	CASRYGGMNTEAFF	6	5.32099e-05	TCRBV07-09	TCRBD02-01*01	TCRBJ01-01*01
CAGCGCACAGAGCAGGGGGACTCGGCCATGTATCTCTGTGCCAGCAGCTTGGGGACCCTAGCCAAAAACATTCAGTACTTCGGCGCC	CASSLGTLAKNIQYF	6	5.32099e-05	TCRBV07-09	unknown	TCRBJ02-04*01
CGGTCCACAAAGCTGGAGGACTCAGCCATGTACTTCTGTGCCAGCAGTGAAGGGGGTATAGGCAATCAGCCCCAGCATTTTGGTGAT	CASSEGGIGNQPQHF	6	5.32099e-05	TCRBV02-01*01	unknown	TCRBJ01-05*01
TTGTTGCTGGGGGACTCGGCCCTCTATCTCTGTGCCAGCAGCTTGGATGCTGGGTCTGGCGGGGGGGATGAGCAGTTCTTCGGGCCA	CASSLDAGSGGGDEQFF	6	5.32099e-05	TCRBV05-06*01	TCRBD02-01*01	TCRBJ02-01*01
TTGGAGCTGGGGGACTCGGCCCTGTATCTCTGTGCCAGAAGCTTGGACTGCTTGCTTGGAGGCAATCAGCCCCAGCATTTTGGTGAT	CARSLDCLLGGNQPQHF	6	5.32099e-05	TCRBV05-03	TCRBD02-01*02	TCRBJ01-05*01
CAGCGCACACAGCAGGAGGACTCGGCCGTGTATCTCTGTGCCAGCAGTCGAAGCGGGGGGAAATACAATGAGCAGTTCTTCGGGCCA	CASSRSGGKYNEQFF	6	5.32099e-05	TCRBV07-02*01	TCRBD02-01*01	TCRBJ02-01*01
TCCCTGGAGCTTGGTGACTCTGCTGTGTATTTCTGTGCCAGCAGCCAAGATAAGGGCAGTACCAACTATGGCTACACCTTCGGTTCG	CASSQDKGSTNYGYTF	6	5.32099e-05	TCRBV03	unknown	TCRBJ01-02*01
CAGCAGGAGGACTCGGCCGTGTATCTCTGTGCCAGCAGCTTAGGAAACCTAGCGGGGCACAGCACAGATACGCAGTATTTTGGCCCA	CASSLGNLAGHSTDTQYF	6	5.32099e-05	TCRBV07-02*01	TCRBD02-01*01	TCRBJ02-03*01
GTGACCAGTGCCCATCCTGAAGACAGCAGCTTCTACATCTGCAGTGCTAGACCCACGGACCGCTACAATGGCTACACCTTCGGTTCG	CSARPTDRYNGYTF	6	5.32099e-05	TCRBV20	unknown	TCRBJ01-02*01
GCCTTGTTGCTGGGGGACTCGGCCCTCTATCTCTGTGCCAGCAGCCGGCGGCTGTCGGGGGCCCAAGAGACCCAGTACTTCGGGCCA	CASSRRLSGAQETQYF	6	5.32099e-05	TCRBV05-06*01	unknown	TCRBJ02-05*01
TCCGCTACCAGCTCCCAGACATCTGTGTACTTCTGTGCCATCAGTGAGCCGGGAGGACATTGGAACACTGAAGCTTTCTTTGGACAA	CAISEPGGHWNTEAFF	6	5.32099e-05	TCRBV10-03*01	TCRBD02-01*02	TCRBJ01-01*01
CTGACCCTGGAGTCTGCCAGGCCCTCACATACCTCTCAGTACCTCTGTGCCAGCAGTGGGAACACAGATACGCAGTATTTTGGCCCA	CASSGNTDTQYF	6	5.32099e-05	TCRBV25-01*01	unknown	TCRBJ02-03*01
CTCAGGCTGGAGTTGGCTGCTCCCTCCCAGACATCTGTGTACTTCTGTGCCAGCACGATGACCCGGGACAGGGTGGACTTCGGGCCG	CASTMTRDRVDF	6	5.32099e-05	TCRBV06-06	TCRBD01-01*01	TCRBJ02-07*01
CTGCTGTCGGCTGCTCCCTCCCAGACATCTGTGTACTTCTGTGCCAGCAGCCACCAAGGACAGGGGACTGAAGCTTTCTTTGGACAA	CASSHQGQGTEAFF	6	5.32099e-05	TCRBV06-05*01	TCRBD01-01*01	TCRBJ01-01*01
AATTCCCTGGAGCTTGGTGACTCTGCTGTGTATTTCTGTGCCAGCAGATCCAACGGGGGGCGCGCGGAGACCCAGTACTTCGGGCCA	CASRSNGGRAETQYF	6	5.32099e-05	TCRBV03	TCRBD02-01*01	TCRBJ02-05*01
CCGCTCAGGCTGCTGTCGGCTGCTCCCTCCCAGACATCTGTGTACTTCTGTGCCAGCGGGCAGTCCTATGGCTACACCTTCGGTTCG	CASGQSYGYTF	6	5.32099e-05	TCRBV06-05*01	TCRBD01-01*01	TCRBJ01-02*01
CAGCCAGAAGACTCAGCCCTGTATCTCTGCGCCAGCAGCCAAGATGCTGGACAGGGGAGTACTAATGAAAAACTGTTTTTTGGCAGT	CASSQDAGQGSTNEKLFF	6	5.32099e-05	TCRBV04-01*01	TCRBD01-01*01	TCRBJ01-04*01
AGGCTGGAGTCGGCTGCTCCCTCCCAGACATCTGTGTACTTCTGTGCCAGCATCGGATCTGTCCGGTTAGGGCAGTACTTCGGGCCG	CASIGSVRLGQYF	6	5.32099e-05	TCRBV06-01*01	unknown	TCRBJ02-07*01
GTGACCAGTGCCCATCCTGAAGACAGCAGCTTCTACATCTGCAGTGCTAGGGGACTAGCGGGGGACCACGAGCAGTACTTCGGGCCG	CSARGLAGDHEQYF	6	5.32099e-05	TCRBV20	TCRBD02-01*01	TCRBJ02-07*01
ACCTTGGAGCTGGGGGACTCGGCCCTTTATCTTTGCGCCAGCAGCTTTGCGGGACAGGGGAATTTAGATACGCAGTATTTTGGCCCA	CASSFAGQGNLDTQYF	6	5.32099e-05	TCRBV05-01*01	TCRBD01-01*01	TCRBJ02-03*01
ATCCAGCAGGTAGTGCGAGGAGATTCGGCAGCTTATTTCTGTGCCAGCTCACCGTCAGGGGGGAGTCAGCCCCAGCATTTTGGTGAT	CASSPSGGSQPQHF	6	5.32099e-05	TCRBV18-01*01	TCRBD01-01*01	TCRBJ01-05*01
ATCCAGCGCACAGAGCAGGGGGACTCGGCCATGTATCTCTGTGCCAGCAGCTTAGCGACGGGGAACTATGGCTACACCTTCGGTTCG	CASSLATGNYGYTF	6	5.32099e-05	TCRBV07-09	TCRBD02-01*01	TCRBJ01-02*01
GCCCTGCAGCCAGAAGACTCAGCCCTGTATCTCTGCGCCAGCAGCCAAAGGACAGGACCCAACCCCTACGAGCAGTACTTCGGGCCG	CASSQRTGPNPYEQYF	6	5.32099e-05	TCRBV04-01*01	TCRBD01-01*01	TCRBJ02-07*01
CTGAAGATCCGGTCCACAAAGCTGGAGGACTCAGCCATGTACTTCTGTGCCAGCAGCCCGGACAGGGGCGAGCAGTACTTCGGGCCG	CASSPDRGEQYF	6	5.32099e-05	TCRBV02-01*01	TCRBD01-01*01	TCRBJ02-07*01
GAGATCCAGCGCACAGAGCAGGGGGACTCGGCCATGTATCTCTGTGCCACCGGGTACACCCCCACAGATACGCAGTATTTTGGCCCA	CATGYTPTDTQYF	6	5.32099e-05	TCRBV07-09	TCRBD02-01	TCRBJ02-03*01
AGGCTGGAGTTGGCTGCTCCCTCCCAGACATCTGTGTACTTCTGTGCCAGCAGTACCGGGGCCCGGAACACCATATATTTTGGAGAG	CASSTGARNTIYF	6	5.32099e-05	TCRBV06-06	unknown	TCRBJ01-03*01
GTGAATGCCTTGGAGCTGGAGGACTCGGCCCTGTATCTCTGTGCCAGCAGCCTGACAAGGACAGTCCCCCGGCAGTACTTCGGGCCG	CASSLTRTVPRQYF	6	5.32099e-05	TCRBV05-08*01	TCRBD01-01*01	TCRBJ02-07*01
CAGCGCACACAGCAGGAGGACTCGGCCGTGTATCTCTGTGCCAGCAGCTTCGGACAGGGTAGCGTCTACGAGCAGTACTTCGGGCCG	CASSFGQGSVYEQYF	6	5.32099e-05	TCRBV07-02*01	TCRBD01-01*01	TCRBJ02-07*01
CTTCACATCAATTCCCTGGAGCTTGGTGACTCTGCTGTGTATTTCTGTGCCAGCAGCCTACGTAACTACGAGCAGTACTTCGGGCCG	CASSLRNYEQYF	6	5.32099e-05	TCRBV03	unknown	TCRBJ02-07*01
CAGCCCTCAGAACCCAGGGACTCAGCTGTGTACTTCTGTGCCAGCAGCCCTTGGCCAGGGGGAGGAAACACCATATATTTTGGAGAG	CASSPWPGGGNTIYF	6	5.32099e-05	TCRBV12	TCRBD01-01*01	TCRBJ01-03*01
ACATCGGCCCAAAAGAACCCGACAGCTTTCTATCTCTGTGCCAGTAGTTCCGGACTAGCGAATAGAAATGAGCAGTTCTTCGGGCCA	CASSSGLANRNEQFF	6	5.32099e-05	TCRBV19-01	TCRBD02-01	TCRBJ02-01*01
CTACACACCCTGCAGCCAGAAGACTCGGCCCTGTATCTCTGTGCCAGCAGCCACTGGGGGGGCACAGATACGCAGTATTTTGGCCCA	CASSHWGGTDTQYF	6	5.32099e-05	TCRBV04-02*01	TCRBD02-01*01	TCRBJ02-03*01
CAGCGCACACAGCAGGAGGACTCCGCCGTGTATCTCTGTGCCAGCAGCGTACTAGCGGGAAGGACAGATACGCAGTATTTTGGCCCA	CASSVLAGRTDTQYF	6	5.32099e-05	TCRBV07-08*01	TCRBD02-01*02	TCRBJ02-03*01
CACCTACACACCCTGCAGCCAGAAGACTCGGCCCTGTATCTCTGTGCCAGCAGCTTATTGGGGAGGCCACCCCTCCACTTTGGGAAC	CASSLLGRPPLHF	6	5.32099e-05	TCRBV04-02*01	TCRBD02-01*02	TCRBJ01-06*01
CTTGACATCCGCTCACCAGGCCTGGGGGACGCAGCCATGTACCTGTGTGCCACCAGCAGAGATTTTTCACCCCTCCACTTTGGGAAC	CATSRDFSPLHF	6	5.32099e-05	TCRBV15-01*01	unknown	TCRBJ01-06*01
ATCCAGCCCTCAGAACCCAGGGACTCAGCTGTGTATTTTTGTGCTAGTGCCCCGAGTACAGCTTCCTACGAGCAGTACTTCGGGCCG	CASAPSTASYEQYF	6	5.32099e-05	TCRBV12-05*01	TCRBD01-01*01	TCRBJ02-07*01
AGGCTGGAGTTGGCTGCTCCCTCCCAGACATCTGTGTACTTCTGTGCCAGCAGACAAGGGATGAACACTGAAGCTTTCTTTGGACAA	CASRQGMNTEAFF	6	5.32099e-05	TCRBV06-06	unknown	TCRBJ01-01*01
ATCCAGCAGGTAGTGCGAGGAGATTCGGCAGCTTATTTCTGTGCCAGCTCCTCCGGGACGAACAACTATGGCTACACCTTCGGTTCG	CASSSGTNNYGYTF	6	5.32099e-05	TCRBV18-01*01	unknown	TCRBJ01-02*01
ACAAAGCTGGAGGACTCAGCCATGTACTTCTGTGCCAGCAATGACAAGACAGAGGCCACAACTAATGAAAAACTGTTTTTTGGCAGT	CASNDKTEATTNEKLFF	6	5.32099e-05	TCRBV02-01*01	TCRBD01-01*01	TCRBJ01-04*01
AGCACCTTGGAGCTGGGGGACTCGGCCCTTTATCTTTGCGCCAGCAGCACCGACAGGGTCGGTAATTCACCCCTCCACTTTGGGAAC	CASSTDRVGNSPLHF	6	5.32099e-05	TCRBV05-01*01	TCRBD01-01*01	TCRBJ01-06*01
GCTGCTCCCTCCCAGACATCTGTGTACTTGTGTGCCAGCAGCCGAAGGTGTCTAGCGGGGGGCCGGTACGAGCAGTACTTCGGGCCG	CASSRRCLAGGRYEQYF	6	5.32099e-05	TCRBV06-08*01	TCRBD02-01*01	TCRBJ02-07*01
CCCCTCACTCTGGAGTCAGCTACCCGCTCCCAGACATCTGTGTATTTCTGCGCCAGCAGTGGCCACTACGAGCAGTACTTCGGGCCG	CASSGHYEQYF	6	5.32099e-05	TCRBV10-02*01	unknown	TCRBJ02-07*01
CTGACTGTGAGCAACATGAGCCCTGAAGACAGCAGCATATATCTCTGCAGCGTTGAAAGGCAGAACACTGAAGCTTTCTTTGGACAA	CSVERQNTEAFF	6	5.32099e-05	TCRBV29-01*01	unknown	TCRBJ01-01*01
GTGACCAGTGCCCATCCTGAAGACAGCAGCTTCTACATCTGCAGTGCTAGCGGGGGTACAACTAATGAAAAACTGTTTTTTGGCAGT	CSASGGTTNEKLFF	6	5.32099e-05	TCRBV20	TCRBD02-01*01	TCRBJ01-04*01
CTGGAGTCGGCTGCTCCCTCCCAGACATCTGTGTACTTCTGTGCCAGCAGTGGACAGGTCGGGGTCGGACCCCTCCACTTTGGGAAC	CASSGQVGVGPLHF	6	5.32099e-05	TCRBV06-01*01	TCRBD01-01*01	TCRBJ01-06*01
CACGCCCTGCAGCCAGAAGACTCAGCCCTGTATCTCTGCGCCAGCAGCCAAGCGGACACAAACACCGGGGAGCTGTTTTTTGGAGAA	CASSQADTNTGELFF	6	5.32099e-05	TCRBV04-01*01	TCRBD01-01*01	TCRBJ02-02*01
CAGCCCTCAGAACCCAGGGACTCAGCTGTGTACTTCTGTGCCAGCAGCTCAGGGACAGGAGCAACCTACGAGCAGTACTTCGGGCCG	CASSSGTGATYEQYF	6	5.32099e-05	TCRBV12	TCRBD01-01*01	TCRBJ02-07*01
GTGAACGCCTTGGAGCTGGACGACTCGGCCCTGTATCTCTGCGCCAGCAGCCAGTTCGGGGGGGCTTACGAGCAGTACTTCGGGCCG	CASSQFGGAYEQYF	6	5.32099e-05	TCRBV05-04*01	TCRBD02-01*01	TCRBJ02-07*01
CGCACACAGCAGGAGGACTCGGCCGTGTATCTCTGTGCCAGCAGCACCCGGGACCCGAGCTCTGGAAACACCATATATTTTGGAGAG	CASSTRDPSSGNTIYF	6	5.32099e-05	TCRBV07-02*01	unknown	TCRBJ01-03*01
CCCAGCCCCAACCAGACCTCTCTGTACTTCTGTGCCAGCAGTTTGGGACAGGGGGCTAATAGCAATCAGCCCCAGCATTTTGGTGAT	CASSLGQGANSNQPQHF	6	5.32099e-05	TCRBV27-01*01	TCRBD01-01*01	TCRBJ01-05*01
AAGATCCAGCCTGCAAAGCTTGAGGACTCGGCCGTGTATCTCTGTGCCAGCAGCTCCGGCAGGGTCAATGAGCAGTTCTTCGGGCCA	CASSSGRVNEQFF	6	5.32099e-05	TCRBV11-02*02	TCRBD01-01*01	TCRBJ02-01*01
ATCCAGCGCACAGAGCGGGGGGACTCAGCCGTGTATCTCTGTGCCAGCAGCTCCGGACAGGGAACAGCGGAGCAGTACTTCGGGCCG	CASSSGQGTAEQYF	6	5.32099e-05	TCRBV07-03*01	TCRBD01-01*01	TCRBJ02-07*01
ACCAGTGCCCATCCTGAAGACAGCAGCTTCTACATCTGCAGTGCTAGAGGTCTGGCGGGGGGCTACAATGAGCAGTTCTTCGGGCCA	CSARGLAGGYNEQFF	6	5.32099e-05	TCRBV20	TCRBD02-01*01	TCRBJ02-01*01
CTGAAGATCCAGCCCTCAGAACCCAGGGACTCAGCTGTGTATTTTTGTGCTAGTGGTCCCCAGGGGCCTGAAGCTTTCTTTGGACAA	CASGPQGPEAFF	6	5.32099e-05	TCRBV12-05*01	TCRBD01-01*01	TCRBJ01-01*01
GTGAACGCCTTGTTGCTGGGGGACTCGGCCCTCTATCTCTGTGCCAGCAGTTGGAGGGTTGGTACCCAGCCCCAGCATTTTGGTGAT	CASSWRVGTQPQHF	6	5.32099e-05	TCRBV05-06*01	TCRBD02-01*02	TCRBJ01-05*01
CTGAGCTCTCTGGAGCTGGGGGACTCAGCTTTGTATTTCTGTGCCAGCAGCGTAGTGGTTCCGGTGCACGAGCAGTACTTCGGGCCG	CASSVVVPVHEQYF	6	5.32099e-05	TCRBV09-01	TCRBD02-01	TCRBJ02-07*01
CACACCCTGCAGCCAGAAGACTCGGCCCTGTATCTCTGCGCCGGAACTGAACCAGGGTTGGAGAGGACTGAAGCTTTCTTTGGACAA	CAGTEPGLERTEAFF	6	5.32099e-05	TCRBV04-03*01	TCRBD01-01*01	TCRBJ01-01*01
ACGGAGTCAGGGGACACAGCACTGTATTTCTGTGCCAGCAGCAATAGTCACCTGAGCTCCTATAATTCACCCCTCCACTTTGGGAAC	CASSNSHLSSYNSPLHF	6	5.32099e-05	TCRBV21-01*01	TCRBD02-01	TCRBJ01-06*01
ACATCGGCCCAAAAGAACCCGACAGCTTTCTATCTCTGTGCCAGTAGTATCGGACCTTATAGCAATCAGCCCCAGCATTTTGGTGAT	CASSIGPYSNQPQHF	6	5.32099e-05	TCRBV19-01	unknown	TCRBJ01-05*01
GCTGCCTCCTCCCAGACATCTGTATATTTCTGCGCCAGCAGAGGCAGGGGGGGAGGGGAACCCACCAATGAGCAGTTCTTCGGGCCA	CASRGRGGGEPTNEQFF	6	5.32099e-05	TCRBV10-01	unknown	TCRBJ02-01*01
TTGTTGCTGGGGGACTCGGCCCTCTATCTCTGTGCCAGCAGCTTTTTTCTGGGGCTAGCGGACCACAATGAGCAGTTCTTCGGGCCA	CASSFFLGLADHNEQFF	6	5.32099e-05	TCRBV05-06*01	TCRBD02-01	TCRBJ02-01*01
CTGAGCTCTCTGGAGCTGGGGGACTCAGCTTTGTATTTCTGTGCCAGCAGCGTAACGGGACAGCGTGAAAAACTGTTTTTTGGCAGT	CASSVTGQREKLFF	6	5.32099e-05	TCRBV09-01	TCRBD01-01*01	TCRBJ01-04*01
AATTCCCTGGAGCTTGGTGACTCTGCTGTGTATTTCTGTGCCAGCAGCCAAGGCCCAGCGGAGGGCTATGGCTACACCTTCGGTTCG	CASSQGPAEGYGYTF	6	5.32099e-05	TCRBV03	TCRBD02-01*02	TCRBJ01-02*01
AAGATCCAGCCTGCAAAGCTTGAGGACTCGGCCGTGTATCTCTGTGCCAGCAGCTTAGATCAGGGCCGGGGCTACACCTTCGGTTCG	CASSLDQGRGYTF	6	5.32099e-05	TCRBV11-02*02	TCRBD01-01*01	TCRBJ01-02*01
CACGCCCTGCAGCCAGAAGACTCAGCCCTGTATCTCTGCGCCAGCAGCCAAGTACAGGGGTTCAATCAGCCCCAGCATTTTGGTGAT	CASSQVQGFNQPQHF	6	5.32099e-05	TCRBV04-01*01	TCRBD01-01*01	TCRBJ01-05*01
GAGTCTGCCAGGCCCTCACATACCTCTCAGTACCTCTGTGCCAGCAGTGAAGCACTAGCGTCATACAATGAGCAGTTCTTCGGGCCA	CASSEALASYNEQFF	6	5.32099e-05	TCRBV25-01*01	TCRBD02-01	TCRBJ02-01*01
AATGCCTTGGAGCTGGAGGACTCGGCCCTGTATCTCTGTGCCAGCAGCTCCGGACTAGCGGGTCGCCACGAGCAGTACTTCGGGCCG	CASSSGLAGRHEQYF	6	5.32099e-05	TCRBV05-08*01	TCRBD02-01	TCRBJ02-07*01
GTGACATCGGCCCAAAAGAACCCGACAGCTTTCTATCTCTGTGCCAGTACCCGGGACAGCTCCTACAATGAGCAGTTCTTCGGGCCA	CASTRDSSYNEQFF	6	5.32099e-05	TCRBV19-01	TCRBD01-01*01	TCRBJ02-01*01
CGGTCCACAAAGCTGGAGGACTCAGCCATGTACTTCTGTGCCAGCAGTGAAACTGGGTTGGTGACTCAGCCCCAGCATTTTGGTGAT	CASSETGLVTQPQHF	6	5.32099e-05	TCRBV02-01*01	unknown	TCRBJ01-05*01
CTGATCCTGGAGTCGCCCAGCCCCAACCAGACCTCTCTGTACTTCTGTGCCAGCAGTACGATACAGGGGCTGGAGTATTTTGGCCCA	CASSTIQGLEYF	6	5.32099e-05	TCRBV27-01*01	TCRBD01-01*01	TCRBJ02-03*01
GTGAACGCCTTGTTGCTGGGGGACTCGGCCCTCTATCTCTGTGCCAGCACCTTGGGGGATTTGGACTATGGCTACACCTTCGGTTCG	CASTLGDLDYGYTF	6	5.32099e-05	TCRBV05-06*01	unknown	TCRBJ01-02*01
AATGTGAACGCCTTGGAGCTGGACGACTCGGCCCTGTATCTCTGTGCCAGCAGCTTATTGGGGAGGCCACCCCTCCACTTTGGGAAC	CASSLLGRPPLHF	6	5.32099e-05	TCRBV05-04*01	TCRBD02-01*02	TCRBJ01-06*01
CAAAAGAACCCGACAGCTTTCTATCTCTGTGCCAGTAGTATAGGGTGGGGACTACCCGCGAACACCGGGGAGCTGTTTTTTGGAGAA	CASSIGWGLPANTGELFF	6	5.32099e-05	TCRBV19-01	TCRBD02-01	TCRBJ02-02*01
GTGAACGCCTTGTTGCTGGGGGACTCGGCCCTCTATCTCTGTGCCAGCAGGGGGAGTAGGGCCCTAGGGACCCAGTACTTCGGGCCA	CASRGSRALGTQYF	6	5.32099e-05	TCRBV05-06*01	TCRBD02-01*02	TCRBJ02-05*01
AGGCTGGAGTTGGCTGCTCCCTCCCAGACATCTGTGTACTTCTGTGCCAGCAGCCTGGCGGGGATAGGTACGCAGTATTTTGGCCCA	CASSLAGIGTQYF	6	5.32099e-05	TCRBV06-06	TCRBD02-01*01	TCRBJ02-03*01
CAGCGCACACAGCAGGAGGACTCGGCCGTGTATCTCTGTGCCAGCAGCTTAGATCATCACGGACTCTACGAGCAGTACTTCGGGCCG	CASSLDHHGLYEQYF	6	5.32099e-05	TCRBV07-02*01	TCRBD02-01	TCRBJ02-07*01
AAGATCCAGCCTGCAAAGCTTGAGGACTCGGCCGTGTATCTCTGTGCCAGCAGCTTAGGTGTAGCGGGCGAGCAGTACTTCGGGCCG	CASSLGVAGEQYF	6	5.32099e-05	TCRBV11-02*02	TCRBD02-01	TCRBJ02-07*01
GTGACATCGGCCCAAAAGAACCCGACAGCTTTCTATCTCTGTGCCAGTAGCCCGGTGACAGGGTCCGGGGAGCTGTTTTTTGGAGAA	CASSPVTGSGELFF	6	5.32099e-05	TCRBV19-01	TCRBD01-01*01	TCRBJ02-02*01
ATCCAGCGCACAGAGCAGGGGGACTCGGCCATGTATCTCTGTGCCAGCAGCTTAGGGACTAGCGCCTTTGAGCAGTTCTTCGGGCCA	CASSLGTSAFEQFF	6	5.32099e-05	TCRBV07-09	TCRBD02-01	TCRBJ02-01*01
CAGCGCACACAGCAGGAGGACTCGGCCGTGTATCTCTGTGCCAGCAGCTTAGGGGACAGGAGAAACACTGAAGCTTTCTTTGGACAA	CASSLGDRRNTEAFF	6	5.32099e-05	TCRBV07-02*01	TCRBD01-01*01	TCRBJ01-01*01
AGCCCCAACCAGACCTCTCTGTACTTCTGTGCCAGCAGTTTATCTCAACACAGAAGGGATGTGGCAGATACGCAGTATTTTGGCCCA	CASSLSQHRRDVADTQYF	6	5.32099e-05	TCRBV27-01*01	unknown	TCRBJ02-03*01
ACACAGCAGGAGGACTCGGCCGTGTATCTCTGTGCCAGCAGCCCAAGTGGGGCTAGCGGGAGCCTACAAGGGCAGTTCTTCGGGCCA	CASSPSGASGSLQGQFF	6	5.32099e-05	TCRBV07-02*01	TCRBD02-01*02	TCRBJ02-01*01
CTGAAGATCCAGCCCTCAGAACCCAGGGACTCAGCTGTGTACTTCTGTGCCAGCAGTTTAGCTGGAAACACCATATATTTTGGAGAG	CASSLAGNTIYF	6	5.32099e-05	TCRBV12	unknown	TCRBJ01-03*01
CGGTCCACAAAGCTGGAGGACTCAGCCATGTACTTCTGTGCCAGCAGCGTATTGACAGGGTTGAACACTGAAGCTTTCTTTGGACAA	CASSVLTGLNTEAFF	6	5.32099e-05	TCRBV02-01*01	TCRBD01-01*01	TCRBJ01-01*01
CAGCAGGTAGTGCGAGGAGATTCGGCAGCTTATTTCTGTGCCAGCTCACCACCGGCGAAGGGGCGGACTGAAGCTTTCTTTGGACAA	CASSPPAKGRTEAFF	6	5.32099e-05	TCRBV18-01*01	TCRBD01-01*01	TCRBJ01-01*01
GCCCAAAAGAACCCGACAGCTTTCTATCTCTGTGCCAGTAGTTCGTTCTCCGGGACAGATGTCGAGCAGCCCCAGCATTTTGGTGAT	CASSSFSGTDVEQPQHF	6	5.32099e-05	TCRBV19-01	TCRBD01-01*01	TCRBJ01-05*01
CACGCCCTGCAGCCAGAAGACTCAGCCCTGTATCTCTGCGCCAGCAGCCTATCGGGACAGGGGGCGTACGAGCAGTACTTCGGGCCG	CASSLSGQGAYEQYF	6	5.32099e-05	TCRBV04-01*01	TCRBD01-01*01	TCRBJ02-07*01
ACCAGTGCCCATCCTGAAGACAGCAGCTTCTACATCTGCAGAGCAGCCCGGGGGGGGGCGCAGGGCACTGAAGCTTTCTTTGGACAA	CRAARGGAQGTEAFF	6	5.32099e-05	TCRBV20	TCRBD02-01*01	TCRBJ01-01*01
AGGATCCAGCAGGTAGTGCGAGGAGATTCGGCAGCTTATTTCTGTGCCAGCTCACCACTCCGGGACACTGAAGCTTTCTTTGGACAA	CASSPLRDTEAFF	6	5.32099e-05	TCRBV18-01*01	TCRBD02-01	TCRBJ01-01*01
TCGGCTGCTCCCTCCCAGACATCTGTGTACTTCTGTGCCAGCAGTGAATACGGGGGGCCCTCCTACAATGAGCAGTTCTTCGGGCCA	CASSEYGGPSYNEQFF	6	5.32099e-05	TCRBV06-01*01	TCRBD02-01*01	TCRBJ02-01*01
CAGCGCACACAGCAGGAGGACTCGGCCGTGTATCTCTGTGCCAGCAGCTTAAACCCGAACGTTAACTATGGCTACACCTTCGGTTCG	CASSLNPNVNYGYTF	6	5.32099e-05	TCRBV07-02*01	unknown	TCRBJ01-02*01
AGCACCTTGGAGCTGGGGGACTCGGCCCTTTATCTTTGCGCCAGCAGCTTGGACCCACAGGGGAACACTGAAGCTTTCTTTGGACAA	CASSLDPQGNTEAFF	6	5.32099e-05	TCRBV05-01*01	TCRBD01-01*01	TCRBJ01-01*01
GAGTTGGCTGCTCCCTCCCAGACATCTGTGTACTTCTGTGCCAGCAGTTACGTTCAGGGGGTTTCCTACGAGCAGTACTTCGGGCCG	CASSYVQGVSYEQYF	6	5.32099e-05	TCRBV06-06	TCRBD01-01*01	TCRBJ02-07*01
ACCCTGGAGTCTGCCAGGCCCTCACATACCTCTCAGTACCTCTGTGCCAGCACCCGGGGGGGCGGCAATACGCAGTATTTTGGCCCA	CASTRGGGNTQYF	6	5.32099e-05	TCRBV25-01*01	TCRBD02-01*01	TCRBJ02-03*01
CTGGAGTTGGCTGCTCCCTCCCAGACATCTGTGTACTTCTGTGCCAGCAGAAACGGTCTTCCGCCCCGGGAGCAGTACTTCGGGCCG	CASRNGLPPREQYF	6	5.32099e-05	TCRBV06-06	TCRBD02-01	TCRBJ02-07*01
GAGTCGGCTGCTCCCTCCCAAACATCTGTGTACTTCTGTGCCAGCAGTTACTATACCGGAGGGAATCAGCCCCAGCATTTTGGTGAT	CASSYYTGGNQPQHF	6	5.32099e-05	TCRBV06	TCRBD02-01*02	TCRBJ01-05*01
CTGAAGATCCAGCCCTCAGAACCCAGGGACTCAGCTGTGTACTTCTGTGCCAGCAACCTAGGGAATCAGCCCCAGCATTTTGGTGAT	CASNLGNQPQHF	6	5.32099e-05	TCRBV12	unknown	TCRBJ01-05*01
CACATCAATTCCCTGGAGCTTGGTGACTCTGCTGTGTATTTCTGTGCCAGCAGCCATCGGACGACCAACGTCCTGACTTTCGGGGCC	CASSHRTTNVLTF	6	5.32099e-05	TCRBV03	unknown	TCRBJ02-06*01
GTGACCAGTGCCCATCCTGAAGACAGCAGCTTCTACATCTGCAGTGCTAGAGGGGGACAGGAGAACAATGAGCAGTTCTTCGGGCCA	CSARGGQENNEQFF	6	5.32099e-05	TCRBV20	TCRBD01-01*01	TCRBJ02-01*01
AGCTCCTTGGAGCTGGGGGACTCAGCCCTGTACTTCTGTGCCAGCAAGCCACTTACCGAGGGCTACTATGGCTACACCTTCGGTTCG	CASKPLTEGYYGYTF	6	5.32099e-05	TCRBV13-01*01	TCRBD02-01*02	TCRBJ01-02*01
GGGTTGGAGTCGGCTGCTCCCTCCCAAACATCTGTGTACTTCTGTGCCAGCAGTTCGACTGCTAACTATGGCTACACCTTCGGTTCG	CASSSTANYGYTF	6	5.32099e-05	TCRBV06	TCRBD02-01	TCRBJ01-02*01
CGCACACAGCAGGAGGACTCGGCCGTGTATCTCTGTGCCAGCAGCTTATTTGCGCGGGGGGGCGCAGAGACCCAGTACTTCGGGCCA	CASSLFARGGAETQYF	6	5.32099e-05	TCRBV07-02*01	TCRBD02-01*01	TCRBJ02-05*01
ATCCAGCCCTCAGAACCCAGGGACTCAGCTGTGTACTTCTGTGCCAGCAGTTTCCGGACTAGCGATGATACGCAGTATTTTGGCCCA	CASSFRTSDDTQYF	6	5.32099e-05	TCRBV12	TCRBD02-01	TCRBJ02-03*01
AGGCTGCTGTCGGCTGCTCCCTCCCAGACATCTGTGTACTTCTGTGCCAGCAAATTAGAAGGACACACTGAAGCTTTCTTTGGACAA	CASKLEGHTEAFF	6	5.32099e-05	TCRBV06-05*01	unknown	TCRBJ01-01*01
GTGAATGCCTTGGAGCTGGAGGACTCGGCCCTGTATCTCTGTGCCAGCACGGGGGGGACATCCTACAATGAGCAGTTCTTCGGGCCA	CASTGGTSYNEQFF	6	5.32099e-05	TCRBV05-08*01	TCRBD02-01*01	TCRBJ02-01*01
ACCTTGGAGCTGGGGGACTCGGCCCTTTATCTTTGCGCCAGCAGCTTGGGGGGGACAGGGGCCCAAGAGACCCAGTACTTCGGGCCA	CASSLGGTGAQETQYF	6	5.32099e-05	TCRBV05-01*01	TCRBD01-01*01	TCRBJ02-05*01
GAGTCGCCCAGCCCCAACCAGACCTCTCTGTACTTCTGTGCCAGCAGTCGGCAGGGGGCGCACACCGGGGAGCTGTTTTTTGGAGAA	CASSRQGAHTGELFF	6	5.32099e-05	TCRBV27-01*01	TCRBD01-01*01	TCRBJ02-02*01
GGGGACTCGGCCATGTATCTCTGTGCCAGCAGCTTATCCTCCTCGGGCCCCCAAGGTCAGACTGGAAACACCATATATTTTGGAGAG	CASSLSSSGPQGQTGNTIYF	6	5.32099e-05	unknown	unknown	TCRBJ01-03*01
CTGAAGATCCGGTCCACAAAGCTGGAGGACTCAGCCATGTACTTCTGTGCCAGCAAAATAAACAGGGACCCCCAGTACTTCGGGCCA	CASKINRDPQYF	6	5.32099e-05	TCRBV02-01*01	TCRBD01-01*01	TCRBJ02-05*01
GAGTCAGCTGCTCCCTCCCAGACATCTGTGTACTTCTGTGCCAGCAGTTATCAGTCTAGCGGGGGAGAGACCCAGTACTTCGGGCCA	CASSYQSSGGETQYF	6	5.32099e-05	TCRBV06-09*01	TCRBD02-01*01	TCRBJ02-05*01
GCAGAACTGGAGGATTCTGGAGTTTATTTCTGTGCCAGCAGCCACATCAGGACGGTTAGTAAGGTCTATGGCTACACCTTCGGTTCG	CASSHIRTVSKVYGYTF	6	5.32099e-05	TCRBV14-01*01	unknown	TCRBJ01-02*01
GTGACCAGTGCCCATCCTGAAGACAGCAGCTTCTACATCTGCAGTGCTAGAGATCTGGGGGTTGGAGGGGGACTGTTTTTTGGCAGT	CSARDLGVGGGLFF	6	5.32099e-05	TCRBV20	unknown	TCRBJ01-04*01
GCAGAACTGGAGGATTCTGGAGTTTATTTCTGTGCCAGCAGCCAGGCTAGCGGGGGGGCTTATCCCTACGAGCAGTACTTCGGGCCG	CASSQASGGAYPYEQYF	6	5.32099e-05	TCRBV14-01*01	TCRBD02-01*01	TCRBJ02-07*01
ACGATCCAGCGCACACAGCAGGAGGACTCGGCCGTGTATCTCTGTGCCAGCAGCTACAGCTCTGGAAACACCATATATTTTGGAGAG	CASSYSSGNTIYF	6	5.32099e-05	TCRBV07-02*01	TCRBD01-01*01	TCRBJ01-03*01
CTGGAGTCCGCTACCAGCTCCCAGACATCTGTGTACTTCTGTGCCATCAGTCCGAGGGACAGTTACACTGAAGCTTTCTTTGGACAA	CAISPRDSYTEAFF	6	5.32099e-05	TCRBV10-03*01	TCRBD01-01*01	TCRBJ01-01*01
CATCCGCTCACCAGGCCTGGGGACGCAGCCATGTACCTGTGTGCCACCAGCAGAGGACAGGGCCGTACACCCCTCCACTTTGGGAAC	CATSRGQGRTPLHF	6	5.32099e-05	TCRBV15-01*01	TCRBD01-01*01	TCRBJ01-06*01
ATCCTGGAGTCGCCCAGCCCCAACCAGACCTCTCTGTACTTCTGTGCCAGCAGTTTAACCCCGGCACAGCCCCAGCATTTTGGTGAT	CASSLTPAQPQHF	6	5.32099e-05	TCRBV27-01*01	unknown	TCRBJ01-05*01
ATCCAGCGCACACAGCAGGAGGACTCCGCCGTGTATCTCTGTGCCAGCAGCCTAGGGCTAAACGCAGATACGCAGTATTTTGGCCCA	CASSLGLNADTQYF	6	5.32099e-05	TCRBV07-08*01	unknown	TCRBJ02-03*01
ATCCAGCGCACAGAGCAGGGGGACTCGGCCATGTATCTCTGTGCCAGCAGATTAAACGCGGCCTCTGGGACCCAGTACTTCGGGCCA	CASRLNAASGTQYF	6	5.32099e-05	TCRBV07-09	TCRBD02-01	TCRBJ02-05*01
ACGTTGGCGTCTGCTGTACCCTCTCAGACATCTGTGTACTTCTGTGCCAGCAGTGAGGGGAACACCGGGGAGCTGTTTTTTGGAGAA	CASSEGNTGELFF	6	5.32099e-05	TCRBV06-04	unknown	TCRBJ02-02*01
GTGACCAGTGCCCATCCTGAAGACAGCAGCTTCTACATCTGCAGTGCTGGGGGACTAGCGGGGTACAATGAGCAGTTCTTCGGGCCA	CSAGGLAGYNEQFF	6	5.32099e-05	TCRBV20	TCRBD02-01*01	TCRBJ02-01*01
AATGTGAACGCCTTGTTGCTGGGGGACTCGGCCCTGTATCTCTGTGCCAGCAGCTTGGCCGGCGCCTACGAGCAGTACTTCGGGCCG	CASSLAGAYEQYF	6	5.32099e-05	TCRBV05-05*01	unknown	TCRBJ02-07*01
CTACACGCCCTGCAGCCAGAAGACTCAGCCCTGTATCTCTGTGCCAGCAGCCAAGGGGGGGTCACAGATACGCAGTATTTTGGCCCA	CASSQGGVTDTQYF	6	5.32099e-05	TCRBV04-01*01	TCRBD02-01*01	TCRBJ02-03*01
GTGCGAGGAGATTCGGCAGCTTATTTCTGTGCCAGCTCACCTCCGGGTGATACAACTCGATCTAATGAAAAACTGTTTTTTGGCAGT	CASSPPGDTTRSNEKLFF	6	5.32099e-05	TCRBV18-01*01	TCRBD02-01	TCRBJ01-04*01
CTGCTGTCGGCTGCTCCCTCCCAGACATCTGTGTACTTCTGTGCCAGCAGTTCCCGGACTCAAATCTACGAGCAGTACTTCGGGCCG	CASSSRTQIYEQYF	6	5.32099e-05	TCRBV06-05*01	TCRBD02-01	TCRBJ02-07*01
GTGACATCGGCCCAAAAGAACCCGACAGCTTTCTATCTCTGTGCCAGTAGTATACAGAGATTCAATCAGCCCCAGCATTTTGGTGAT	CASSIQRFNQPQHF	6	5.32099e-05	TCRBV19-01	unknown	TCRBJ01-05*01
TTGGAGTCGGCTGCTCCCTCCCAAACATCTGTGTACTTCTGTGCCAGCAGTTACCCCGCTCCTCGGGGCGAGCAGTACTTCGGGCCG	CASSYPAPRGEQYF	6	5.32099e-05	TCRBV06	TCRBD02-01*01	TCRBJ02-07*01
TCCACAAAGCTGGAGGACTCAGCCATGTACTTCTGTGCCAGCAGTGCCCCCGACGGGGGGGCAACAGATACGCAGTATTTTGGCCCA	CASSAPDGGATDTQYF	6	5.32099e-05	TCRBV02-01*01	TCRBD02-01*01	TCRBJ02-03*01
CTGAGCTCTCTGGAGCTGGGGGACTCAGCTTTGTATTTCTGTGCCAGCAGCGTAGGGACTCTCCAAGAGACCCAGTACTTCGGGCCA	CASSVGTLQETQYF	6	5.32099e-05	TCRBV09-01	TCRBD02-01	TCRBJ02-05*01
CTGAAGATCCAGCGCACACAGCAGGAGGACTCCGCCGTGTATCTCTGTGCCGTGGGACAGGGGGCAAATACGCAGTATTTTGGCCCA	CAVGQGANTQYF	6	5.32099e-05	TCRBV07-08*01	TCRBD01-01*01	TCRBJ02-03*01
CTGCAGCCAGAAGACTCGGCCCTGTATCTCTGCGCCAGCAGCCAAGGTGGTAGTGGGACAGATAATGAAAAACTGTTTTTTGGCAGT	CASSQGGSGTDNEKLFF	6	5.32099e-05	TCRBV04-03*01	TCRBD01-01*01	TCRBJ01-04*01
ACATCGGCCCAAAAGAACCCGACAGCTTTCTATCTCTGTGCCAGTAGCTCCCGGGACAGCTCTGGAAACACCATATATTTTGGAGAG	CASSSRDSSGNTIYF	6	5.32099e-05	TCRBV19-01	TCRBD01-01*01	TCRBJ01-03*01
GAGTCGCCCAGCCCCAACCAGACCTCTCTGTACTTCTGTGCCAGCAGCCTAGGACCGGGACAGGCCTATGGCTACACCTTCGGTTCG	CASSLGPGQAYGYTF	6	5.32099e-05	TCRBV27-01*01	TCRBD01-01*01	TCRBJ01-02*01
GTGACCAGTGCCCATCCTGAAGACAGCAGCTTCTACATCTGCAGTGCCGGGCCGGGGACGCGGAATGAAAAACTGTTTTTTGGCAGT	CSAGPGTRNEKLFF	6	5.32099e-05	TCRBV20	unknown	TCRBJ01-04*01
AGGCTGCTGTCGGCTGCTCCCTCCCAGACATCTGTGTACTTCTGTGCCAGCATGGGCAGTTCTAATGAAAAACTGTTTTTTGGCAGT	CASMGSSNEKLFF	6	5.32099e-05	TCRBV06-05*01	TCRBD01-01*01	TCRBJ01-04*01
CTTCACCTACACACCCTGCAGCCAGAAGACTCGGCCCTGTATCTCTGCGCCAGCAAGGGGGGCACAGATACGCAGTATTTTGGCCCA	CASKGGTDTQYF	6	5.32099e-05	TCRBV04-03*01	TCRBD01-01*01	TCRBJ02-03*01
AACGCCTTGTTGCTGGGGGACTCGGCCCTCTATCTCTGTGCCAGCAGCTTGCAGACTAGCGGGTTCTACGAGCAGTACTTCGGGCCG	CASSLQTSGFYEQYF	6	5.32099e-05	TCRBV05-06*01	TCRBD02-01	TCRBJ02-07*01
AGTGCCCATCCTGAAGACAGCAGCTTCTACATCTGCAGTCCTCAGGTGGGGGGGGTAAGATGGAACACTGAAGCTTTCTTTGGACAA	CSPQVGGVRWNTEAFF	6	5.32099e-05	TCRBV20	TCRBD02-01*01	TCRBJ01-01*01
AATTCCCTGGAGCTTGGTGACTCTGCTGTGTATTTCTGTGCCAGCAGACACACTAGCGGGGGCGGCGGGGAGCTGTTTTTTGGAGAA	CASRHTSGGGGELFF	6	5.32099e-05	TCRBV03	TCRBD02-01*01	TCRBJ02-02*01
TCCCTAGAGTCTGCCATCCCCAACCAGACAGCTCTTTACTTCTGTGCCCCGATGGGACGGGTCAAGTTCGAGCAGTACTTCGGGCCG	CAPMGRVKFEQYF	6	5.32099e-05	TCRBV24	unknown	TCRBJ02-07*01
TCGGCTGCTCCCTCCCAGACATCTGTGTACTTCTGTGCCAGCAGTGGCAGATCGGGACAGCTTAACACTGAAGCTTTCTTTGGACAA	CASSGRSGQLNTEAFF	6	5.32099e-05	TCRBV06-01*01	TCRBD01-01*01	TCRBJ01-01*01
ATCCAGCCTGCAAAGCTTGAGGACTCGGCCGTGTATCTCTGTGCCAGCAGCTCCGATCACTCAGAACAGCCCCAGCATTTTGGTGAT	CASSSDHSEQPQHF	6	5.32099e-05	TCRBV11-02*02	unknown	TCRBJ01-05*01
CTGAAGATCCAGCCCTCAGAACCCAGGGACTCAGCTGTGTACTTCTGTGCCAGCAGCCAGACAGTCAATGAGCAGTTCTTCGGGCCA	CASSQTVNEQFF	6	5.32099e-05	TCRBV12	TCRBD01-01*01	TCRBJ02-01*01
ACCTTGGAGCTGGGGGACTCGGCCCTTTATCTTTGCGCCAGCAGTCCCGGGACGGGCCCAACTAATGAAAAACTGTTTTTTGGCAGT	CASSPGTGPTNEKLFF	6	5.32099e-05	TCRBV05-01*01	unknown	TCRBJ01-04*01
CTGACAGTGACCAGTGCCCATCCTGAAGACAGCAGCTTCTACATCTGCAGCCCAGGGGGAATGAACACTGAAGCTTTCTTTGGACAA	CSPGGMNTEAFF	6	5.32099e-05	TCRBV20	TCRBD01-01*01	TCRBJ01-01*01
ACCAGTGCCCATCCTGAAGACAGCAGCTTCTACATCTGCAGTGCTAGAGATGGGGGGCAGGGTAGTTCACCCCTCCACTTTGGGAAC	CSARDGGQGSSPLHF	6	5.32099e-05	TCRBV20	unknown	TCRBJ01-06*01
ACCTTGGAGCTGGGGGACTCGGCCCTTTATCTTTGCGCCAGCAGTTTAACTAGCGGGGGATCCTACAATGAGCAGTTCTTCGGGCCA	CASSLTSGGSYNEQFF	6	5.32099e-05	TCRBV05-01*01	TCRBD02-01*01	TCRBJ02-01*01
ACAGTGACCAGTGCCCATCCTGAAGACAGCAGCTTCTACATCTGCAGTGCTAGAGTCGGGGACCTCGGGGGCTACACCTTCGGTTCG	CSARVGDLGGYTF	6	5.32099e-05	TCRBV20	unknown	TCRBJ01-02*01
AATGCCTTGGAGCTGGAGGACTCGGCCCTGTATCTCTGTGCCAGCAGCCGAGGGTCCTCGTACCAAGAGACCCAGTACTTCGGGCCA	CASSRGSSYQETQYF	6	5.32099e-05	TCRBV05-08*01	TCRBD02-01*02	TCRBJ02-05*01
AGCACCTTGGAGCTGGGGGACTCGGCCCTTTATCTTTGCGCCAGCAGCTTGCTAGCGGACAGGAGGGATGAGCAGTTCTTCGGGCCA	CASSLLADRRDEQFF	6	5.32099e-05	TCRBV05-01*01	unknown	TCRBJ02-01*01
ACCAACCAGACATCTATGTACCTCTGTGCCAGCCCACCGTGGAAGGGACAGGGAGCTTCTAGCACAGATACGCAGTATTTTGGCCCA	CASPPWKGQGASSTDTQYF	6	5.32099e-05	TCRBV28-01*01	TCRBD01-01*01	TCRBJ02-03*01
AACGCCTTGGAGCTGGACGACTCGGCCCTGTATCTCTGTGCCAGCAACCCGAGGGGCAGGGAGGCTTATGGCTACACCTTCGGTTCG	CASNPRGREAYGYTF	6	5.32099e-05	TCRBV05-04*01	TCRBD02-01*02	TCRBJ01-02*01
ATCCGCTCACCAGGCCTGGGGGACGCAGCCATGTACCTGTGTGCCACCAGCAGAAAGCGGGGGGCGTACGAGCAGTACTTCGGGCCG	CATSRKRGAYEQYF	6	5.32099e-05	TCRBV15-01*01	TCRBD02-01*01	TCRBJ02-07*01
AGTGCCCATCCTGAAGACAGCAGCTTCTACATCTGCAGTGCTAGAGATCGGGACGGGGGTTCCCAAGAGACCCAGTACTTCGGGCCA	CSARDRDGGSQETQYF	6	5.32099e-05	TCRBV20	TCRBD02-01*01	TCRBJ02-05*01
TCCACAAAGCTGGAGGACTCAGCCATGTACTTCTGTGCCAGCAGTGAAGCGCTTCCAGGGGCCGGCTATGGCTACACCTTCGGTTCG	CASSEALPGAGYGYTF	6	5.32099e-05	TCRBV02-01*01	TCRBD01-01*01	TCRBJ01-02*01
GAGTTGGCTGCTCCCTCCCAGACATCTGTGTACTTCTGTGCCAGCAGATCCCCGGGACAGGGGAACACTGAAGCTTTCTTTGGACAA	CASRSPGQGNTEAFF	6	5.32099e-05	TCRBV06-06	TCRBD01-01*01	TCRBJ01-01*01
CCTGCAAAGCTTGAGGACTCGGCCGTGTATCTCTGTGCCAGCAGCTTAGGAGTGGCGGCTTCCTACAATGAGCAGTTCTTCGGGCCA	CASSLGVAASYNEQFF	6	5.32099e-05	TCRBV11-02*02	TCRBD02-01	TCRBJ02-01*01
CAGCCCTCAGAACCCAGGGACTCAGCTGTGTACTTCTGTGCCAGCAGTTTAGTGAGGACACTCAACACTGAAGCTTTCTTTGGACAA	CASSLVRTLNTEAFF	6	5.32099e-05	TCRBV12	TCRBD01-01*01	TCRBJ01-01*01
CTCAAGATCCAGCCTGCAGAGCTTGGGGACTCGGCCATGTATCTCTGTGCCAGCAGCTTATATGGGGGAGAGCAGTACTTCGGGCCG	CASSLYGGEQYF	6	5.32099e-05	TCRBV11-01*01	unknown	TCRBJ02-07*01
ACTGTGACATCGGCCCAAAAGAACCCGACAGCTTTCTATCTCTGTGCCAGTAGTCTCGGGGGGAACAATGAGCAGTTCTTCGGGCCA	CASSLGGNNEQFF	6	5.32099e-05	TCRBV19-01	TCRBD02-01*01	TCRBJ02-01*01
CTGACGATCCAGCGCACAGAGCAGCGGGACTCGGCCATGTATCGCTGTGCCAGCAGCTTAGGTAGAAGTGAGCAGTTCTTCGGGCCA	CASSLGRSEQFF	6	5.32099e-05	TCRBV07-06*01	TCRBD02-01	TCRBJ02-01*01
GGGTTGGAGTCGGCTGCTCCCTCCCAAACATCTGTGTACTTCTGTGCCAGCAGTTACGGCAGATTAGGGGAGCAGTTCTTCGGGCCA	CASSYGRLGEQFF	6	5.32099e-05	TCRBV06	unknown	TCRBJ02-01*01
CAGCCCTCAGAACCCAGGGACTCAGCTGTGTATTTTTGTGCTAGTGGTCCTCAGGGATATAGCAATCAGCCCCAGCATTTTGGTGAT	CASGPQGYSNQPQHF	6	5.32099e-05	TCRBV12-05*01	TCRBD01-01*01	TCRBJ01-05*01
AACATGAGCTCCTTGGAGCTGGGGGACTCAGCCCTGTACTTCTGTGCCAGCAGCACGACAGGGATCACTGAAGCTTTCTTTGGACAA	CASSTTGITEAFF	6	5.32099e-05	TCRBV13-01*01	TCRBD01-01*01	TCRBJ01-01*01
TGTACCTTGGAGATCCAGTCCACGGAGTCAGGGGACACAGCACTGTATTTCTGTGCCAGCAGCGGAGACGAGCAGTACTTCGGGCCG	CASSGDEQYF	6	5.32099e-05	TCRBV21-01*01	TCRBD02-01*02	TCRBJ02-07*01
CAGCCTGCAGAACTGGAGGATTCTGGAGTTTATTTCTGTGCCAGCAGCCAGTCGACAGGGGGCGCGTATGGCTACACCTTCGGTTCG	CASSQSTGGAYGYTF	6	5.32099e-05	TCRBV14-01*01	TCRBD01-01*01	TCRBJ01-02*01
CGCTCACCAGGCCTGGGGGACGCAGCCATGTACCTGTGTGCCACCAGCAGAGACCCCAGCGCAGAGAACGGAGCTTTCTTTGGACAA	CATSRDPSAENGAFF	6	5.32099e-05	TCRBV15-01*01	TCRBD02-01	TCRBJ01-01*01
CTGGAGCTGGGGGACTCAGCTTTGTATTTCTGTGCCAGCAGCGCGTCCCGGGACAGGGTAGGCACAGATACGCAGTATTTTGGCCCA	CASSASRDRVGTDTQYF	6	5.32099e-05	TCRBV09-01	TCRBD01-01*01	TCRBJ02-03*01
CAGCCCTCAGAACCCAGGGACTCAGCTGTGTACTTCTGTGCCAGCAGTCCCGGACAGGGGACCATCTATGGCTACACCTTCGGTTCG	CASSPGQGTIYGYTF	6	5.32099e-05	TCRBV12	TCRBD01-01*01	TCRBJ01-02*01
AACCTGAGCTCTCTGGAGCTGGGGGACTCAGCTTTGTATTTCTGTGCCAGCAGCGTAGAAGTACAAGCTGAAGCTTTCTTTGGACAA	CASSVEVQAEAFF	6	5.32099e-05	TCRBV09-01	TCRBD01-01*01	TCRBJ01-01*01
CTGGAGTCCGCCAGCACCAACCAGACATCTATGTACCTCTGTGCCAGCAGTTTAAGAGCGGGGAATTCACCCCTCCACTTTGGGAAC	CASSLRAGNSPLHF	6	5.32099e-05	TCRBV28-01*01	TCRBD02-01*01	TCRBJ01-06*01
ATCCAGCCCTCAGAACCCAGGGACTCAGCTGTGTATTTTTGTGCTAGTGCCCCGGGACAGGTCTACAATGAGCAGTTCTTCGGGCCA	CASAPGQVYNEQFF	6	5.32099e-05	TCRBV12-05*01	TCRBD01-01*01	TCRBJ02-01*01
CTGGGGTTGGAGTCGGCTGCTCCCTCCCAAACATCTGTGTACTTCTGTGCCAGCGCGACTAGTTCGGAGACCCAGTACTTCGGGCCA	CASATSSETQYF	6	5.32099e-05	TCRBV06	TCRBD02-01	TCRBJ02-05*01
CTACACGCCCTGCAGCCAGAAGACTCAGCCCTGTATCTCTGCGCCAGCAGCGCTGGTCTTCAGCAGGGTAGCTACACCTTCGGTTCG	CASSAGLQQGSYTF	6	5.32099e-05	TCRBV04-01*01	TCRBD01-01*01	TCRBJ01-02*01
AGCTCCTTGGAGCTGGGGGACTCAGCCCTGTACTTCTGTGCCAGCAGCTCACAGGGCAAACTCACAGATACGCAGTATTTTGGCCCA	CASSSQGKLTDTQYF	6	5.32099e-05	TCRBV13-01*01	TCRBD01-01*01	TCRBJ02-03*01
AACCTGAGCTCTCTGGAGCTGGGGGACTCAGCTTTGTATTTCTGTGCCAGCAGCGTAGCTGCAGGGCTAGAGCAGTACTTCGGGCCG	CASSVAAGLEQYF	6	5.32099e-05	TCRBV09-01	TCRBD01-01*01	TCRBJ02-07*01
GCCCATCCTGAAGACAGCAGCTTCTACATCTGCAGTGCTAGTGACCTTCAGGGGGTAAGCTCCTACAATGAGCAGTTCTTCGGGCCA	CSASDLQGVSSYNEQFF	6	5.32099e-05	TCRBV20	TCRBD01-01*01	TCRBJ02-01*01
CACACCCTGCAGCCAGAAGACTCGGCCCTGTATCTCTGTGCCAGCAGCCAAGATCGACAGGGATTCAATGAGCAGTTCTTCGGGCCA	CASSQDRQGFNEQFF	6	5.32099e-05	TCRBV04-02*01	TCRBD01-01*01	TCRBJ02-01*01
AGCACCTTGGAGCTGGGGGACTCGGCCCTTTATCTTTGCGCCAGCAGCTTGGGCCTAGCGGGGACCTACGAGCAGTACTTCGGGCCG	CASSLGLAGTYEQYF	6	5.32099e-05	TCRBV05-01*01	TCRBD02-01*01	TCRBJ02-07*01
ACGATCCAGCGCACAGAGCAGCGGGACTCGGCCATGTATCGCTGTGCCAGCAGCTTAGAACACGACTATGGCTACACCTTCGGTTCG	CASSLEHDYGYTF	6	5.32099e-05	TCRBV07-06*01	TCRBD01-01*01	TCRBJ01-02*01
ACTCTGAAGATCCAGCGCACACAGCAGGAGGACTCCGCCGTGTATCTCTGTGCCAGCAGCCGTAAGAACGAGCAGTACTTCGGGCCG	CASSRKNEQYF	6	5.32099e-05	TCRBV07-08*01	unknown	TCRBJ02-07*01
AATGCCTTGGAGCTGGAGGACTCGGCCCTGTATCTCTGTGCCAGCAGCCCTAGACAGCAGAATCAAGAGACCCAGTACTTCGGGCCA	CASSPRQQNQETQYF	6	5.32099e-05	TCRBV05-08*01	TCRBD01-01*01	TCRBJ02-05*01
AGGATCCAGCAGGTAGTGCGAGGAGATTCGGCAGCTTATTTCTGTGCCAGCTCACTTAAGGTTCCCTATGGCTACACCTTCGGTTCG	CASSLKVPYGYTF	6	5.32099e-05	TCRBV18-01*01	unknown	TCRBJ01-02*01
GAGTCAGGGGACACAGCACTGTATTTCTGTGCCAGCAGCAAGGACCGGGACAGGGGGCCCTCTGGAAACACCATATATTTTGGAGAG	CASSKDRDRGPSGNTIYF	6	5.32099e-05	TCRBV21-01*01	TCRBD01-01*01	TCRBJ01-03*01
GCTCCCTCCCAGACATCTGTGTACTTCTGTGCCAGCAGTGGAACGTATAAGCGGACCGTATTCCCAGAGACCCAGTACTTCGGGCCA	CASSGTYKRTVFPETQYF	6	5.32099e-05	TCRBV06-01*01	TCRBD02-01	TCRBJ02-05*01
GAGATGAATGTGAGTGCCTTGGAGCTGGGGGACTCGGCCCTGTATCTCTGTGCCAGAAGCTTACGCGAGACCCAGTACTTCGGGCCA	CARSLRETQYF	6	5.32099e-05	TCRBV05-03	unknown	TCRBJ02-05*01
CTCACTCTGGAGTCTGCTGCCTCCTCCCAGACATCTGTATATTTCTGCGCCAGCAGTGAGGGACAGGGGGCGGCTTTCTTTGGACAA	CASSEGQGAAFF	6	5.32099e-05	TCRBV10-01	TCRBD01-01*01	TCRBJ01-01*01
TCGCCCAGCCCCAACCAGACCTCTCTGTACTTCTGTGCCAGCAGTTCTCAGGTCGGGGGCGGTGGCACTGAAGCTTTCTTTGGACAA	CASSSQVGGGGTEAFF	6	5.32099e-05	TCRBV27-01*01	unknown	TCRBJ01-01*01
CTGGAGTTGGCTGCTCCCTCCCAGACATCTGTGTACTTCTGTGCCAGCAGACTCGCCGACGGTACCTATGGCTACACCTTCGGTTCG	CASRLADGTYGYTF	6	5.32099e-05	TCRBV06-06	unknown	TCRBJ01-02*01
CAGCGCACACAGCAGGAGGACTCCGCCGTGTATCTCTGTGCCAGCAGCCCCACAGGGGTTGGCGCCGGGGAGCTGTTTTTTGGAGAA	CASSPTGVGAGELFF	6	5.32099e-05	TCRBV07-08*01	TCRBD01-01*01	TCRBJ02-02*01
TCCGCTACCAGCTCCCAGACATCTGTGTACTTCTGTGCCATCGGCCGGGGACTGGAGGCTAGCACAGATACGCAGTATTTTGGCCCA	CAIGRGLEASTDTQYF	6	5.32099e-05	TCRBV10-03*01	TCRBD02-01	TCRBJ02-03*01
ACTCTGACAGTGACCAGTGCCCATCCTGAAGACAGCAGCTTCTACATCTGCAGTGCGGGGGGTTCAGATACGCAGTATTTTGGCCCA	CSAGGSDTQYF	6	5.32099e-05	TCRBV20-01*01	TCRBD02-01*01	TCRBJ02-03*01
CTCAGGCTGCTGTCGGCTGCTCCCTCCCAGACATCTGTGTACTTCTGTGCCACCGAACAAGACACCGGGGAGCTGTTTTTTGGAGAA	CATEQDTGELFF	6	5.32099e-05	TCRBV06-05*01	TCRBD01-01*01	TCRBJ02-02*01
GTAGTGCGAGGAGATTCGGCAGCTTATTTCTGTGCCAGCTCACCGTGGGCCACCGGGACAGCGAAAAACACCATATATTTTGGAGAG	CASSPWATGTAKNTIYF	6	5.32099e-05	TCRBV18-01*01	TCRBD01-01*01	TCRBJ01-03*01
TTGTTGCTGGGGGACTCGGCCCTCTATCTCTGTGCCAGCAGCCAAGGGAGGGGGCGGTGGTCAAATGAAAAACTGTTTTTTGGCAGT	CASSQGRGRWSNEKLFF	6	5.32099e-05	TCRBV05-06*01	unknown	TCRBJ01-04*01
GCCTTGTTGCTGGGGGACTCGGCCCTCTATCTCTGTGCCAGCAGCCGCTCCGGGACTAGCGGCTACTACGAGCAGTACTTCGGGCCG	CASSRSGTSGYYEQYF	6	5.32099e-05	TCRBV05-06*01	TCRBD02-01	TCRBJ02-07*01
CTCAGGCTGGAGTTGGCTGCTCCCTCCCAGACATCTGTGTACTTCTGTGCCAGCAAGGCGGGACAGGGGCAGCAGTACTTCGGGCCG	CASKAGQGQQYF	6	5.32099e-05	TCRBV06-06	TCRBD01-01*01	TCRBJ02-07*01
AAGATCCAGCGCACAGAGCGGGGGGACTCAGCCGTGTATCTCTGTGCCAGCAGCTTAGGAGGGGTAGAGACCCAGTACTTCGGGCCA	CASSLGGVETQYF	6	5.32099e-05	TCRBV07-03*01	TCRBD02-01*02	TCRBJ02-05*01
CTGTCGGCTGCTCCCTCCCAGACATCTGTGTACTTCTGTGCCAGCAGTTCCCAAGCAGGGGGCGGTCAGCCCCAGCATTTTGGTGAT	CASSSQAGGGQPQHF	6	5.32099e-05	TCRBV06-05*01	TCRBD01-01*01	TCRBJ01-05*01
GTGAGCACCTTGGAGCTGGGGGACTCGGCCCTTTATCTTTGCGCCAGCAGCTTGCTGGACAGTTACACTGAAGCTTTCTTTGGACAA	CASSLLDSYTEAFF	6	5.32099e-05	TCRBV05-01*01	TCRBD01-01*01	TCRBJ01-01*01
ACCCTGCAGCCAGAAGACTCGGCCCTGTATCTCTGCGCCAGCAGCCAAGTAGGGGCCCGTTTTAACTATGGCTACACCTTCGGTTCG	CASSQVGARFNYGYTF	6	5.32099e-05	TCRBV04-03*01	TCRBD01-01*01	TCRBJ01-02*01
ACAGTGACCAGTGCCCATCCTGAAGACAGCAGCTTCTACATCTGCAGTGCTACAGGACAGGGGGCATACGAGCAGTACTTCGGGCCG	CSATGQGAYEQYF	6	5.32099e-05	TCRBV20	TCRBD01-01*01	TCRBJ02-07*01
GTACCCTCTCAGACATCTGTGTACTTCTGTGCCAGCAGCCTCGGACAGAGATTCAATTATAGCAATCAGCCCCAGCATTTTGGTGAT	CASSLGQRFNYSNQPQHF	6	5.32099e-05	TCRBV06-04	TCRBD01-01*01	TCRBJ01-05*01
ATCCAGCCTGCAAAGCTTGAGGACTCGGCCGTGTATCTCTGTGCCAGCAGCTCCAATTGGGCCCTTTACGAGCAGTACTTCGGGCCG	CASSSNWALYEQYF	6	5.32099e-05	TCRBV11-02*02	TCRBD01-01*01	TCRBJ02-07*01
CACGCCCTGCAGCCAGAAGACTCAGCCCTGTATCTCTGCGCCAGCAGCCAAGGAGGCAGGGTGGATTCACCCCTCCACTTTGGGAAC	CASSQGGRVDSPLHF	6	5.32099e-05	TCRBV04-01*01	TCRBD01-01*01	TCRBJ01-06*01
ACCCTGCAGCCAGAAGACTCGGCCCTGTATCTCTGCGCCAGCAGCCAAGACCGAGGTAGCGGGACAGATACGCAGTATTTTGGCCCA	CASSQDRGSGTDTQYF	6	5.32099e-05	TCRBV04-03*01	TCRBD02-01	TCRBJ02-03*01
CGCACAGAGCAGGGGGACTCGGCCATGTATCTCTGTGCCAGCAGCCCAAAGGGGGGGCCTTCCTACAATGAGCAGTTCTTCGGGCCA	CASSPKGGPSYNEQFF	6	5.32099e-05	TCRBV07-09	TCRBD02-01*01	TCRBJ02-01*01
CTGACTGTGAGCAACATGAGCCCTGAAGACAGCAGCATATATCTCTGCAGCGTTGAGATCCAGAACACTGAAGCTTTCTTTGGACAA	CSVEIQNTEAFF	6	5.32099e-05	TCRBV29-01*01	unknown	TCRBJ01-01*01
CACACCCTGCAGCCAGAAGACTCGGCCCTGTATCTCTGCGCCAGCAGCCAAGGTGCGGGGAGTCAAGAGACCCAGTACTTCGGGCCA	CASSQGAGSQETQYF	6	5.32099e-05	TCRBV04-03*01	TCRBD02-01*01	TCRBJ02-05*01
CAGCGCACACAGCAGGAGGACTCGGCCGTGTATCTCTGTGCCAGCAGCTTTCAGTTTACTAGCACAGATACGCAGTATTTTGGCCCA	CASSFQFTSTDTQYF	6	5.32099e-05	TCRBV07-02*01	unknown	TCRBJ02-03*01
GCGTCTGCTGTACCCTCTCAGACATCTGTGTACTTCTGTGCCAGCAGTGGACTAGCGGGGGGGCTCAATGAGCAGTTCTTCGGGCCA	CASSGLAGGLNEQFF	6	5.32099e-05	TCRBV06-04	TCRBD02-01*01	TCRBJ02-01*01
AAGATCCAGCGCACACAGCAGGAGGACTCCGCCGTGTATCTCTGTGCCAGCAGCTTAGGTAAAGGGGAGACCCAGTACTTCGGGCCA	CASSLGKGETQYF	6	5.32099e-05	TCRBV07-08*01	unknown	TCRBJ02-05*01
CTGAAGATCCAGCCCTCAGAACCCAGGGACTCAGCTGTGTACTTCTGTGCCAGCAGTTTAAACGTCTACGAGCAGTACTTCGGGCCG	CASSLNVYEQYF	6	5.32099e-05	TCRBV12	unknown	TCRBJ02-07*01
CTTGGTGACTCTGCTGTGTATTTCTGTGCCAGCAGTTCGATCGGGACTAGCCGGGATGGAGGATGGGAGACCCAGTACTTCGGGCCA	CASSSIGTSRDGGWETQYF	6	5.32099e-05	TCRBV03	TCRBD02-01	TCRBJ02-05*01
ATCCAGCCTGCAAAGCTTGAGGACTCGGCCGTGTATCTCTGTGCCAGCAGCTTACAGGCCGGGGGGCGGGAGCAGTACTTCGGGCCG	CASSLQAGGREQYF	6	5.32099e-05	TCRBV11-02*02	TCRBD02-01*01	TCRBJ02-07*01
GTGCAGCCTGCAGAACTGGAGGATTCTGGAGTTTATTTCTGTGCCAGCAGCCCTGGGACAGGGCGTTCACCCCTCCACTTTGGGAAC	CASSPGTGRSPLHF	6	5.32099e-05	TCRBV14-01*01	TCRBD01-01*01	TCRBJ01-06*01
GTGAACGCCTTGGAGCTGGACGACTCGGCCCTGTATCTCTGTGCCAGCAGCTTGTCGTTCGGGCGCAATGAGCAGTTCTTCGGGCCA	CASSLSFGRNEQFF	6	5.32099e-05	TCRBV05-04*01	unknown	TCRBJ02-01*01
ACGATCCAGCGCACACAGCAGGAGGACTCGGCCGTGTATCTCTGTGCCAGCAGCTTAGACGGGTTGGGGGGCTACACCTTCGGTTCG	CASSLDGLGGYTF	6	5.32099e-05	TCRBV07-02*01	unknown	TCRBJ01-02*01
ACCAGTGCCCATCCTGAAGACAGCAGCTTCTACATCTGCAGTGCTGGCCGCAGGGAATTTGGCACAGATACGCAGTATTTTGGCCCA	CSAGRREFGTDTQYF	6	5.32099e-05	TCRBV20	TCRBD01-01*01	TCRBJ02-03*01
GTGAACGCCTTGGAGCTGGACGACTCGGCCCTGTATCTCTGTGCCAGCAGGGAAACAGTCGCCCACAATGAGCAGTTCTTCGGGCCA	CASRETVAHNEQFF	6	5.32099e-05	TCRBV05-04*01	TCRBD01-01*01	TCRBJ02-01*01
TCGGCCCAAAAGAACCCGACAGCTTTCTATCTCTGTGCCAGTAGTATTCCCGGGACAGGGGGAGGGAAGACCCAGTACTTCGGGCCA	CASSIPGTGGGKTQYF	6	5.32099e-05	TCRBV19-01	TCRBD01-01*01	TCRBJ02-05*01
CACACCCTGCAGCCAGAAGACTCGGCCCTGTATCTCTGTGCCAGCAGCTTGCAGACTAGCGGGTTCTACGAGCAGTACTTCGGGCCG	CASSLQTSGFYEQYF	6	5.32099e-05	TCRBV04-02*01	TCRBD02-01	TCRBJ02-07*01
CAGGTAGTGCGAGGAGATTCGGCAGCTTATTTCTGTGCCAGCTCACCCATCTGGACGGACCGAATTTCACCCCTCCACTTTGGGAAC	CASSPIWTDRISPLHF	6	5.32099e-05	TCRBV18-01*01	unknown	TCRBJ01-06*01
AGCAACATGAGCCCTGAAGACAGCAGCATATATCTCTGCAGCGTTGGAAGGCAGGGGGCACTCGCAGATACGCAGTATTTTGGCCCA	CSVGRQGALADTQYF	6	5.32099e-05	TCRBV29-01*01	TCRBD01-01*01	TCRBJ02-03*01
AATTCCCTGGAGCTTGGTGACTCTGCTGTGTATTTCTGTGCCAGCAGCCTAACCGGGACTGGCACAGATACGCAGTATTTTGGCCCA	CASSLTGTGTDTQYF	6	5.32099e-05	TCRBV03	TCRBD02-01	TCRBJ02-03*01
CGCACAGAGCGGGGGGACTCAGCCGTGTATCTCTGTGCCAGCAGCTTAACCCCTGGCGGGGGGAAGAGTAGGCAGTACTTCGGGCCG	CASSLTPGGGKSRQYF	6	5.32099e-05	TCRBV07-03*01	TCRBD02-01*01	TCRBJ02-07*01
CTCAAGATCCAGCCTGCAAAGCTTGAGGACTCGGCCGTGTATCTCTGTGCCAGCAGCTACGCCACAGATACGCAGTATTTTGGCCCA	CASSYATDTQYF	6	5.32099e-05	TCRBV11-02*02	unknown	TCRBJ02-03*01
CTGAGCTCTCTGGAGCTGGGGGACTCAGCTTTGTATTTCTGTGCCAGCAGCCCGACAGGGGGCTCGGAGACCCAGTACTTCGGGCCA	CASSPTGGSETQYF	6	5.32099e-05	TCRBV09-01	TCRBD01-01*01	TCRBJ02-05*01
GAGTCGGCTGCTCCCTCCCAGACATCTGTGTACTTCTGTGCCAGCAGATCCCCGGGACAGGGGAACACTGAAGCTTTCTTTGGACAA	CASRSPGQGNTEAFF	6	5.32099e-05	TCRBV06-01*01	TCRBD01-01*01	TCRBJ01-01*01
ATCCAGCAGGTAGTGCGAGGAGATTCGGCAGCTTATTTCTGTGCCAGCTCGCACAGGGGGCCACCCTGTGAAGCTTTCTTTGGACAA	CASSHRGPPCEAFF	6	5.32099e-05	TCRBV18-01*01	TCRBD01-01*01	TCRBJ01-01*01
CACGCCCTGCAGCCAGAAGACTCAGCCCTGTATCTCTGCGCCAGCAGCCTAGGCTTATTGGGCGGGGAGACCCAGTACTTCGGGCCA	CASSLGLLGGETQYF	6	5.32099e-05	TCRBV04-01*01	TCRBD02-01	TCRBJ02-05*01
CTAAACCTGAGCTCTCTGGAGCTGGGGGACTCAGCTTTGTATTTCTGTGCCAGCAGCCTGGACAGGGGCGGCTACACCTTCGGTTCG	CASSLDRGGYTF	6	5.32099e-05	TCRBV09-01	TCRBD01-01*01	TCRBJ01-02*01
AAGATCCAGCCCTCAGAACCCAGGGACTCAGCTGTGTACTTCTGTGCCAGCAGTTTATCAGGGAAGAGCGAGCAGTACTTCGGGCCG	CASSLSGKSEQYF	6	5.32099e-05	TCRBV12	TCRBD01-01*01	TCRBJ02-07*01
ATGAATGTGAGCACCTTGGAGCTGGGGGACTCGGCCCTTTATCTTTGCGCCAGCAGCTTGGCCGTTCAGCCCCAGCATTTTGGTGAT	CASSLAVQPQHF	6	5.32099e-05	TCRBV05-01*01	TCRBD02-01	TCRBJ01-05*01
ACATCGGCCCAAAAGAACCCGACAGCTTTCTATCTCTGTGCCAGCCGAGGACAGGCCGCGAACACCGGGGAGCTGTTTTTTGGAGAA	CASRGQAANTGELFF	6	5.32099e-05	TCRBV19-01	TCRBD01-01*01	TCRBJ02-02*01
GTGACATCGGCCCAAAAGAACCCGACAGCTTTCTATCTCTGTGCCAGTACCTCGACAGGGGAGGCTTCACCCCTCCACTTTGGGAAC	CASTSTGEASPLHF	6	5.32099e-05	TCRBV19-01	TCRBD01-01*01	TCRBJ01-06*01
GTGACCAGTGCCCATCCTGAAGACAGCAGCTTCTACATCTGCAGTGCTAGAGCCGGACAGGTCAATCAGCCCCAGCATTTTGGTGAT	CSARAGQVNQPQHF	6	5.32099e-05	TCRBV20	TCRBD01-01*01	TCRBJ01-05*01
CTGGAGTCGCCCAGCCCCAACCAGACCTCTCTGTACTTCTGTGCCAGCACCCCTCTTCAGGGGGCTACTGAAGCTTTCTTTGGACAA	CASTPLQGATEAFF	6	5.32099e-05	TCRBV27-01*01	TCRBD01-01*01	TCRBJ01-01*01
AAGATCCAGCCCTCAGAACCCAGGGACTCAGCTGTGTACTTCTGTGCCAGCAAGGGGGGAGGCACAGATACGCAGTATTTTGGCCCA	CASKGGGTDTQYF	6	5.32099e-05	TCRBV12	unknown	TCRBJ02-03*01
ACATCGGCCCAAAAGAACCCGACAGCTTTCTATCTCTGTGCCAGTAGTATAGGACTGGCCTCGGGGGAGGGCTACACCTTCGGTTCG	CASSIGLASGEGYTF	6	5.32099e-05	TCRBV19-01	TCRBD02-01*01	TCRBJ01-02*01
CTGCAGCCAGAAGACTCGGCCCTGTATCTCTGCGCCAGCAGCCAATCGACAGGGAGTAATACTGGAAACACCATATATTTTGGAGAG	CASSQSTGSNTGNTIYF	6	5.32099e-05	TCRBV04-03*01	TCRBD01-01*01	TCRBJ01-03*01
ACTCTGAAGATCCGGTCCACAAAGCTGGAGGACTCAGCCATGTACTTCTGTGCCAGCAGGAAGAACACTGAAGCTTTCTTTGGACAA	CASRKNTEAFF	6	5.32099e-05	TCRBV02-01*01	unknown	TCRBJ01-01*01
CAGCGCACAGAGCAGGGGGACTCGGCCATGTATCTCTGTGCCAGCAGCTTAGTGACAGGGGATAATTCACCCCTCCACTTTGGGAAC	CASSLVTGDNSPLHF	6	5.32099e-05	TCRBV07-09	TCRBD01-01*01	TCRBJ01-06*01
GTGAGCAACATGAGCCCTGAAGACAGCAGCATATATCTCTGCAGCGTGGAGTCCGGGACTACCACCGGGGAGCTGTTTTTTGGAGAA	CSVESGTTTGELFF	6	5.32099e-05	TCRBV29-01*01	TCRBD02-01	TCRBJ02-02*01
CAGCGCACACAGCAGGAGGACTCGGCCGTGTATCTCTGTGCCAGCAGCTTAGCGCTAACCGTGGAAGAGACCCAGTACTTCGGGCCA	CASSLALTVEETQYF	6	5.32099e-05	TCRBV07-02*01	TCRBD02-01	TCRBJ02-05*01
CTGGAGCTGGGGGACTCAGCTTTGTATTTCTGTGCCAGCAGCGTATTAGGAGGGCGGGGGCGACCAGATACGCAGTATTTTGGCCCA	CASSVLGGRGRPDTQYF	6	5.32099e-05	TCRBV09-01	TCRBD02-01*01	TCRBJ02-03*01
AGGCTGGAGTCGGCTGCTCCCTCCCAGACATCTGTGTACTTCTGTGCCAGCAGTGCCGGAGGAGGGTACGAGCAGTACTTCGGGCCG	CASSAGGGYEQYF	6	5.32099e-05	TCRBV06-01*01	TCRBD02-01*02	TCRBJ02-07*01
AGTGCCCATCCTGAAGACAGCAGCTTCTACATCTGCAGTGCTAGAGATCGGCAACGGGGGCTCGGGGATGAGCAGTTCTTCGGGCCA	CSARDRQRGLGDEQFF	6	5.32099e-05	TCRBV20	unknown	TCRBJ02-01*01
AAGATCCGGTCCACAAAGCTGGAGGACTCAGCCATGTACTTCTGTGCCAGCAGTCAGGGGGAGATGACTGAAGCTTTCTTTGGACAA	CASSQGEMTEAFF	6	5.32099e-05	TCRBV02-01*01	TCRBD01-01*01	TCRBJ01-01*01
CTGACAGTGACCAGTGCCCATCCTGAAGACAGCAGCTTCTACATCTGCAGTGCCCCTCGCGGGGGCGGGGAGCTGTTTTTTGGAGAA	CSAPRGGGELFF	6	5.32099e-05	TCRBV20	TCRBD02-01*01	TCRBJ02-02*01
GTGAGCACCTTGGAGCTGGGGGACTCGGCCCTTTATCTTTGCGCCAGCAGCCGGGACACACTCAACACTGAAGCTTTCTTTGGACAA	CASSRDTLNTEAFF	6	5.32099e-05	TCRBV05-01*01	TCRBD01-01*01	TCRBJ01-01*01
AAGATCCGGTCCACAAAGCTGGAGGACTCAGCCATGTACTTCTGTGCCAGCAGCACAGGTTCAACCTACGAGCAGTACTTCGGGCCG	CASSTGSTYEQYF	6	5.32099e-05	TCRBV02-01*01	TCRBD01-01*01	TCRBJ02-07*01
TCGCCCAGCCCCAACCAGACCTCTCTGTACTTCTGTGCCAGCAGCCTGGACAAGTCCGCAGCTAACTATGGCTACACCTTCGGTTCG	CASSLDKSAANYGYTF	6	5.32099e-05	TCRBV27-01*01	TCRBD01-01*01	TCRBJ01-02*01
CAGCGCACACAGCAGGAGGACTCGGCCGTGTATCTCTGTGCCAGCAGCTTAGACTATAATCCACTCTATGGCTACACCTTCGGTTCG	CASSLDYNPLYGYTF	6	5.32099e-05	TCRBV07-02*01	TCRBD02-01	TCRBJ01-02*01
CAGTCCACGGAGTCAGGGGACACAGCACTGTATTTCTGTGCCAGCAGGCGGACTAGCGGGGGAAGGGAGACCCAGTACTTCGGGCCA	CASRRTSGGRETQYF	6	5.32099e-05	TCRBV21-01*01	TCRBD02-01*01	TCRBJ02-05*01
GTGAACGCCTTGGAGCTGGACGACTCGGCCCTGTATCTCTGTGCCAGCAGCTTGGTGGGGGTAGAAACTGAAGCTTTCTTTGGACAA	CASSLVGVETEAFF	6	5.32099e-05	TCRBV05-04*01	unknown	TCRBJ01-01*01
ACAGTGACCAGTGCCCATCCTGAAGACAGCAGCTTCTACATCTGCAGTGCTACCGCCGGGACCCAGAATGAGCAGTTCTTCGGGCCA	CSATAGTQNEQFF	6	5.32099e-05	TCRBV20	unknown	TCRBJ02-01*01
CTGTCGGCTGCTCCCTCCCAGACATCTGTGTACTTCTGTGCCAGCAGTAAAGCAGACAGTCGCTGGAAGACCCAGTACTTCGGGCCA	CASSKADSRWKTQYF	6	5.32099e-05	TCRBV06	TCRBD01-01*01	TCRBJ02-05*01
AGTGCCCATCCTGAAGACAGCAGCTTCTACATCTGCAGTGCTAGAGATGCGGTACAGGGGGGGACCGGGGAGCTGTTTTTTGGAGAA	CSARDAVQGGTGELFF	6	5.32099e-05	TCRBV20	TCRBD01-01*01	TCRBJ02-02*01
CTGACGATCCAGCGCACACAGCAGGAGGACTCGGCCGTGTATCTCTGTGCCAGCAGCCTTGACACCGGGGAGCTGTTTTTTGGAGAA	CASSLDTGELFF	6	5.32099e-05	TCRBV07-02*01	TCRBD02-01	TCRBJ02-02*01
GAGTCGGCTGCTCCCTCCCAAACATCTGTGTACTTCTGTGCCAGCAGTTTGGGGCCGGGGCCCACCGGGGAGCTGTTTTTTGGAGAA	CASSLGPGPTGELFF	6	5.32099e-05	TCRBV06	unknown	TCRBJ02-02*01
GCAGAACTGGAGGATTCTGGAGTTTATTTCTGTGCCAGCAGCCAAACTAGAGGGCAGGCTTCCGTTTCACCCCTCCACTTTGGGAAC	CASSQTRGQASVSPLHF	6	5.32099e-05	TCRBV14-01*01	TCRBD02-01	TCRBJ01-06*01
GTGACATCGGCCCAAAAGAACCCGACAGCTTTCTATCTCTGTGCCAGTAACCCCAAGGGCTGGAATCAGCCCCAGCATTTTGGTGAT	CASNPKGWNQPQHF	6	5.32099e-05	TCRBV19-01	unknown	TCRBJ01-05*01
ACGGAGTCAGGGGACACAGCACTGTATTTCTGTGCCAGCAGCGCTGCACCTCTGGGGGGCGTGAATCAGCCCCAGCATTTTGGTGAT	CASSAAPLGGVNQPQHF	6	5.32099e-05	TCRBV21-01*01	unknown	TCRBJ01-05*01
ACAGAGCAGGGGGACTCGGCCATGTATCTCTGTGCCAGCAGCCCCCGGGTGCTAGCGGGGGGGATAAGAGAGCAGTTCTTCGGGCCA	CASSPRVLAGGIREQFF	6	5.32099e-05	TCRBV07-09	TCRBD02-01*01	TCRBJ02-01*01
ACCAGTGCCCATCCTGAAGACAGCAGCTTCTACATCTGCAGTGCTAGAGCTCCGCGGGATGGTGGCGATACGCAGTATTTTGGCCCA	CSARAPRDGGDTQYF	6	5.32099e-05	TCRBV20	TCRBD02-01*02	TCRBJ02-03*01
CTGTCGGCTGCTCCCTCCCAGACATCTGTGTACTTCTGTGCCAGCATCATCTCGGCCACCTCCTACAATGAGCAGTTCTTCGGGCCA	CASIISATSYNEQFF	6	5.32099e-05	TCRBV06-05*01	unknown	TCRBJ02-01*01
CAGCCTGCAGAGCTTGGGGACTCGGCCGTGTATCTCTGTGCCAGCAGCTTAGATCATCACGGACTCTACGAGCAGTACTTCGGGCCG	CASSLDHHGLYEQYF	6	5.32099e-05	TCRBV11-03*01	TCRBD02-01	TCRBJ02-07*01
ACCAGCTCCCAGACATCTGTGTACTTCTGTGCCATCAGTGAGGTTCCGGGACTGAGCTCCTATAATTCACCCCTCCACTTTGGGAAC	CAISEVPGLSSYNSPLHF	6	5.32099e-05	TCRBV10-03*01	TCRBD02-01	TCRBJ01-06*01
CTGGAGCTGGGGGACTCAGCTTTGTATTTCTGTGCCAGCAGCGAGCCCCCGGGGGCAGGGGAGCAGAATGAGCAGTTCTTCGGGCCA	CASSEPPGAGEQNEQFF	6	5.32099e-05	TCRBV09-01	unknown	TCRBJ02-01*01
CAGCAGGTAGTGCGAGGAGATTCGGCAGCTTATTTCTGTGCCAGCTTAAGCCGGGGGGGCGTCAAAGATACGCAGTATTTTGGCCCA	CASLSRGGVKDTQYF	6	5.32099e-05	TCRBV18-01*01	TCRBD02-01*01	TCRBJ02-03*01
CACGCCCTGCAGCCAGAAGACTCAGCCCTGTATCTCTGCGCCAGCAGCCAAGAAGACGACCGACTCGGTGAAGCTTTCTTTGGACAA	CASSQEDDRLGEAFF	6	5.32099e-05	TCRBV04-01*01	TCRBD02-01	TCRBJ01-01*01
GTGAGCACCTTGGAGCTGGGGGACTCGGCCCTTTATCTTTGCGCCAGCAGCTTGGCCGTCGACCACAATGAGCAGTTCTTCGGGCCA	CASSLAVDHNEQFF	6	5.32099e-05	TCRBV05-01*01	unknown	TCRBJ02-01*01
CTGCTGTCGGCTGCTCCCTCCCAGACATCTGTGTACTTCTGTGCCAGCAGGAAGGAGGGGCCTAACACTGAAGCTTTCTTTGGACAA	CASRKEGPNTEAFF	6	5.32099e-05	TCRBV06-05*01	TCRBD02-01*02	TCRBJ01-01*01
CTGTCGGCTGCTCCCTCCCAGACATCTGTGTACTTCTGTGCCAGCAGACCCGGAGGGGGGGCACACACTGAAGCTTTCTTTGGACAA	CASRPGGGAHTEAFF	6	5.32099e-05	TCRBV06-05*01	TCRBD02-01*01	TCRBJ01-01*01
CGGTCCACAAAGCTGGAGGACTCAGCCATGTACTTCTGTGCCAGCAAGAGGGCAGGGGGCGAGAACACTGAAGCTTTCTTTGGACAA	CASKRAGGENTEAFF	6	5.32099e-05	TCRBV02-01*01	TCRBD01-01*01	TCRBJ01-01*01
AAGATCCAGCCTGCAAAGCTTGAGGACTCGGCCGTGTATCTCTGTGCCAGCAGCTTAGAGCCGGCCAGCGAGCAGTTCTTCGGGCCA	CASSLEPASEQFF	6	5.32099e-05	TCRBV11-02*02	unknown	TCRBJ02-01*01
CGCACAGAGCAGGGGGACTCGGCCATGTATCTCTGTGCCAGCAGCTTAGATCCGGGCCTTAGCTCCTACGAGCAGTACTTCGGGCCG	CASSLDPGLSSYEQYF	6	5.32099e-05	TCRBV07-09	unknown	TCRBJ02-07*01
CTGGAGCTTGGTGACTCTGCTGTGTATTTCTGTGCCAGCAGCCAAGATGGACAGGGGTGTGGGAACACTGAAGCTTTCTTTGGACAA	CASSQDGQGCGNTEAFF	6	5.32099e-05	TCRBV03	TCRBD01-01*01	TCRBJ01-01*01
AAGATCCAGCGCACAGAGCGGGGGGACTCAGCCGTGTATCTCTGTGCCAGCAGCCCAGGACCTAACAATGAGCAGTTCTTCGGGCCA	CASSPGPNNEQFF	6	5.32099e-05	TCRBV07-03*01	unknown	TCRBJ02-01*01
CAGCCTGCAAAGCTTGAGGACTCGGCCGTGTATCTCTGTGCCAGCAGCTGGACTAGCGGGACGAACAATGAGCAGTTCTTCGGGCCA	CASSWTSGTNNEQFF	6	5.32099e-05	TCRBV11-02*02	TCRBD02-01*02	TCRBJ02-01*01
ACTGTGACATCGGCCCAAAAGAACCCGACAGCTTTCTATCTCTGTGCCAGTAGTATAGATAAGGGGAACATTCAGTACTTCGGCGCC	CASSIDKGNIQYF	6	5.32099e-05	TCRBV19-01	TCRBD01-01*01	TCRBJ02-04*01
GCCTTGGAGCTGGACGACTCGGCCCTGTATCTCTGTGCCAGCAGCATTGGACAGTCGAGCTCTGGAAACACCATATATTTTGGAGAG	CASSIGQSSSGNTIYF	6	5.32099e-05	TCRBV05-04*01	TCRBD01-01*01	TCRBJ01-03*01
CAGCCCTCAGAACCCAGGGACTCAGCTGTGTACTTCTGTGCCAGCAGTTTAAGCCCCGTGGGCACCGGGGAGCTGTTTTTTGGAGAA	CASSLSPVGTGELFF	6	5.32099e-05	TCRBV12	unknown	TCRBJ02-02*01
GCCCAAAAGAACCCGACAGCTTTCTATCTCTGTGCCAGTAGTATAGATCGGGCTGGCTTGTCGGTAGATACGCAGTATTTTGGCCCA	CASSIDRAGLSVDTQYF	6	5.32099e-05	TCRBV19-01	unknown	TCRBJ02-03*01
CTCAGGCTGCTGTCGGCTGCTCCCTCCCAGACATCTGTGTACTTCTGTGCCAGCAGGGACCGTGGGGAGACCCAGTACTTCGGGCCA	CASRDRGETQYF	6	5.32099e-05	TCRBV06-05*01	unknown	TCRBJ02-05*01
TCCGCCAGCACCAACCAGACATCTATGTACCTCTGTGCCAGCAGTGACCTAAGGACAGGGGGTTCCTATGGCTACACCTTCGGTTCG	CASSDLRTGGSYGYTF	6	5.32099e-05	TCRBV28-01*01	TCRBD01-01*01	TCRBJ01-02*01
GCCTTGTTGCTGGGGGACTCGGCCCTCTATCTCTGTGCCAGCAGCTCCGCCGGGACAGGGCCCGGCACTGAAGCTTTCTTTGGACAA	CASSSAGTGPGTEAFF	6	5.32099e-05	TCRBV05-06*01	TCRBD01-01*01	TCRBJ01-01*01
TCCCTGGAGCTTGGTGACTCTGCTGTGTATTTCTGTGCCAGCAGCCAGGGAATGGGGGCGAGAAATCAGCCCCAGCATTTTGGTGAT	CASSQGMGARNQPQHF	6	5.32099e-05	TCRBV03	TCRBD01-01*01	TCRBJ01-05*01
AAGGTGCAGCCTGCAGAACTGGAGGATTCTGGAGTTTATTTCTGTGCCAGCAGCCAAGGAGGGGTCACTGAAGCTTTCTTTGGACAA	CASSQGGVTEAFF	6	5.32099e-05	TCRBV14-01*01	unknown	TCRBJ01-01*01
CTGGAGTCGCCCAGCCCCAACCAGACCTCTCTGTACTTCTGTGCCAGCAGTTTCGGGGGACAGCACGAGACCCAGTACTTCGGGCCA	CASSFGGQHETQYF	6	5.32099e-05	TCRBV27-01*01	TCRBD01-01*01	TCRBJ02-05*01
TCTCTGGAGCTGGGGGACTCAGCTTTGTATTTCTGTGCCAGCAGCGTTCTGGGACAGGGGTGGAGGGATACGCAGTATTTTGGCCCA	CASSVLGQGWRDTQYF	6	5.32099e-05	TCRBV09-01	TCRBD01-01*01	TCRBJ02-03*01
GCTGCTCCCTCCCAGACATCTGTGTACTTCTGTGCCAGCAGTTATTCCGGGACGGCCAGCTCCTACAATGAGCAGTTCTTCGGGCCA	CASSYSGTASSYNEQFF	6	5.32099e-05	TCRBV06	unknown	TCRBJ02-01*01
CAGCGGGACTCGGCCATGTATCGCTGTGCCAGCAGCTTACCAAAAGGGACAGGGGGTTCATCGAACACTGAAGCTTTCTTTGGACAA	CASSLPKGTGGSSNTEAFF	6	5.32099e-05	TCRBV07-06*01	TCRBD01-01*01	TCRBJ01-01*01
AATGCCTTGGAGCTGGAGGACTCGGCCCTGTATCTCTGTGCCAGCAGCTTGCAGACTAGCGGGTTCTACGAGCAGTACTTCGGGCCG	CASSLQTSGFYEQYF	6	5.32099e-05	TCRBV05-08*01	TCRBD02-01	TCRBJ02-07*01
TCTGAACTAAACCTGAGCTCTCTGGAGCTGGGGGACTCAGCTTTGTATTTCTGTGCCAGCAGCGTAGAGACCCAGTACTTCGGGCCA	CASSVETQYF	6	5.32099e-05	TCRBV09-01	unknown	TCRBJ02-05*01
GCAAAGCTTGAGGACTCGGCCGTGTATCTCTGTGCCAGCAGCTACGTCCCGGGACAGGGAGGGGGTGGAGAGCAGTACTTCGGGCCG	CASSYVPGQGGGGEQYF	6	5.32099e-05	TCRBV11-02*02	TCRBD01-01*01	TCRBJ02-07*01
ATCCGGTCCACAAAGCTGGAGGACTCAGCCATGTACTTCTGTGCCAGCAGTTCAGGGTATGCCAAAAACATTCAGTACTTCGGCGCC	CASSSGYAKNIQYF	6	5.32099e-05	TCRBV02-01*01	TCRBD01-01*01	TCRBJ02-04*01
ATCCGGTCCACAAAGCTGGAGGACTCAGCCATGTACTTCTGTGCCAGCAATCATTTACGGGGTGACTATGGCTACACCTTCGGTTCG	CASNHLRGDYGYTF	6	5.32099e-05	TCRBV02-01*01	TCRBD02-01*01	TCRBJ01-02*01
ATCCAGCCTGCAGAGCTTGGGGACTCGGCCATGTATCTCTGTGCCAGCAGTACGACAGGGAACCGCTACGAGCAGTACTTCGGGCCG	CASSTTGNRYEQYF	6	5.32099e-05	TCRBV11-01*01	TCRBD01-01*01	TCRBJ02-07*01
CTGACAGTGACCAGTGCCCATCCTGAAGACAGCAGCTTCTACATCTGCAGTGCTACCACCAGGGCCCCTGGCTACACCTTCGGTTCG	CSATTRAPGYTF	6	5.32099e-05	TCRBV20	TCRBD01-01*01	TCRBJ01-02*01
AGCTCTCTGGAGCTGGGGGACTCAGCTTTGTATTTCTGTGCCAGCAGCGTAGAGTCTGGGAGAAACTATGGCTACACCTTCGGTTCG	CASSVESGRNYGYTF	6	5.32099e-05	TCRBV09-01	TCRBD02-01*02	TCRBJ01-02*01
CTCACTCTGGAGTCAGCTACCCGCTCCCAGACATCTGTGTATTTCTGCGCCACTGAACGGGATGACTATGGCTACACCTTCGGTTCG	CATERDDYGYTF	6	5.32099e-05	TCRBV10-02*01	TCRBD02-01*02	TCRBJ01-02*01
GTGAGCAACATGAGCCCTGAAGACAGCAGCATATATCTCTGCAGCGTCCAGCCCGGGACAGTCTCCTACGAGCAGTACTTCGGGCCG	CSVQPGTVSYEQYF	6	5.32099e-05	TCRBV29-01*01	TCRBD01-01*01	TCRBJ02-07*01
ACAGTGACCAGTGCCCATCCTGAAGACAGCAGCTTCTACATCTGCAGTGCTAGAGACAGGGAGGATTCACCCCTCCACTTTGGGAAC	CSARDREDSPLHF	6	5.32099e-05	TCRBV20	TCRBD02-01*02	TCRBJ01-06*01
AACGCCTTGTTGCTGGGGGACTCGGCCCTCTATCTCTGTGCCAGCAGCCGAGGGTTAGACCCCAATCAGCCCCAGCATTTTGGTGAT	CASSRGLDPNQPQHF	6	5.32099e-05	TCRBV05-06*01	TCRBD02-01*02	TCRBJ01-05*01
CTCAGGCTGCTGTCGGCTGCTCCCTCCCAGACATCTGTGTACTTCTGTGCCAGCAGGGACAGGGGTGAAAAACTGTTTTTTGGCAGT	CASRDRGEKLFF	6	5.32099e-05	TCRBV06-05*01	TCRBD01-01*01	TCRBJ01-04*01
CACCTACACGCCCTGCAGCCAGAAGACTCAGCCCTGTATCTCTGCGCCAGCAGCCATCATCAGGGGTATGAGCAGTTCTTCGGGCCA	CASSHHQGYEQFF	6	5.32099e-05	TCRBV04-01*01	TCRBD01-01*01	TCRBJ02-01*01
AATGTGAACGCCTTGTTGCTGGGGGACTCGGCCCTGTATCTCTGTGCCAGCAGCCTCGTCTATAATTCACCCCTCCACTTTGGGAAC	CASSLVYNSPLHF	6	5.32099e-05	TCRBV05-05*01	TCRBD02-01	TCRBJ01-06*01
CACACCCTGCAGCCAGAAGACTCGGCCCTGTATCTCTGCGCCAGCAGCCAAGTGGGCCATACGCGAGAAAAACTGTTTTTTGGCAGT	CASSQVGHTREKLFF	6	5.32099e-05	TCRBV04-03*01	TCRBD01-01*01	TCRBJ01-04*01
ACGAAGCTTGAGGATTCAGCAGTGTATTTTTGTGCCAGCAGCCAATTGGAACTAGGGACGGGGAACTACGAGCAGTACTTCGGGCCG	CASSQLELGTGNYEQYF	6	5.32099e-05	TCRBV16-01	unknown	TCRBJ02-07*01
GTGAGCACCTTGGAGCTGGGGGACTCGGCCCTTTATCTTTGCGCCAGCAGCTTGCAGACAGCGAACACTGAAGCTTTCTTTGGACAA	CASSLQTANTEAFF	6	5.32099e-05	TCRBV05-01*01	TCRBD01-01*01	TCRBJ01-01*01
GAGTCGGCTGCTCCCTCCCAGACATCTGTGTACTTCTGTGCCAGCAGTTACGTTCAGGGGGTTTCCTACGAGCAGTACTTCGGGCCG	CASSYVQGVSYEQYF	6	5.32099e-05	TCRBV06-05*01	TCRBD01-01*01	TCRBJ02-07*01
TCTGCTGTACCCTCTCAGACATCTGTGTACTTCTGTGCCAGCAGTGACGGGGGGCCGTATAGCAATCAGCCCCAGCATTTTGGTGAT	CASSDGGPYSNQPQHF	6	5.32099e-05	TCRBV06-04	unknown	TCRBJ01-05*01
ACTCTGGAGTCAGCTACCCGCTCCCAGACATCTGTGTATTTCTGCGCCAGCAGCCGACAGGGGAGAGGCGAGCAGTACTTCGGGCCG	CASSRQGRGEQYF	6	5.32099e-05	TCRBV10-02*01	TCRBD01-01*01	TCRBJ02-07*01
CATCCTGAAGACAGCAGCTTCTACATCTGCAGTGCTAGAGCACCGAAGAGAGTGATAGCGGGGGGGCGGGAGCAGTACTTCGGGCCG	CSARAPKRVIAGGREQYF	6	5.32099e-05	TCRBV20	TCRBD02-01*01	TCRBJ02-07*01
ACTGTGAGCAACATGAGCCCTGAAGACAGCAGCATATATCTCTGCAGCGTTGCTTGGGGGGCAGGCACTGAAGCTTTCTTTGGACAA	CSVAWGAGTEAFF	6	5.32099e-05	TCRBV29-01*01	unknown	TCRBJ01-01*01
GAGTCGGCTGCTCCCTCCCAGACATCTGTGTACTTCTGTGCCAGCAGTGAGCAGGGAGTAGCCAAAAACATTCAGTACTTCGGCGCC	CASSEQGVAKNIQYF	6	5.32099e-05	TCRBV06-01*01	unknown	TCRBJ02-04*01
GAGTCGGCTGCTCCCTCCCAAACATCTGTGTACTTCTGTGCCAGCAGTTTCCGACAGGCTAGCTCCTACGAGCAGTACTTCGGGCCG	CASSFRQASSYEQYF	6	5.32099e-05	TCRBV06	TCRBD01-01*01	TCRBJ02-07*01
AGCTCTCTGGAGCTGGGGGACTCAGCTTTGTATTTCTGTGCCAGCAGCGTGGCGGGGGGTCCTCAAGAGACCCAGTACTTCGGGCCA	CASSVAGGPQETQYF	6	5.32099e-05	TCRBV09-01	TCRBD02-01*01	TCRBJ02-05*01
CTGGAGCTGGGGGACTCAGCTTTGTATTTCTGTGCCAGCAGCGCCGGGACTAGCGGGCGGCTTGCAGATACGCAGTATTTTGGCCCA	CASSAGTSGRLADTQYF	6	5.32099e-05	TCRBV09-01	TCRBD02-01	TCRBJ02-03*01
CTGGAGTCCGCTACCAGCTCCCAGACATCTGTGTACTTCTGTGCCGGGAGGTCGGGCGTCGGCGCGAACGAGCAGTACTTCGGGCCG	CAGRSGVGANEQYF	6	5.32099e-05	TCRBV10-03*01	TCRBD02-01*02	TCRBJ02-07*01
TCGGCTGCTCCCTCCCAGACATCTGTGTACTTCTGTGCCAGCAGTTACTCGAAGGCATTACAGAACACTGAAGCTTTCTTTGGACAA	CASSYSKALQNTEAFF	6	5.32099e-05	TCRBV06-05*01	unknown	TCRBJ01-01*01
TCGCCCAGCCCCAACCAGACCTCTCTGTACTTCTGTGCCAGCAGTTTATGGAGCGGGGGAAACACCGGGGAGCTGTTTTTTGGAGAA	CASSLWSGGNTGELFF	6	5.32099e-05	TCRBV27-01*01	TCRBD02-01*01	TCRBJ02-02*01
ATCAATTCCCTGGAGCTTGGTGACTCTGCTGTGTATTTCTGTGCCAGCAGCCAATCTTACTCTGGAAACACCATATATTTTGGAGAG	CASSQSYSGNTIYF	6	5.32099e-05	TCRBV03	TCRBD02-01	TCRBJ01-03*01
GCCTTGGAGCTGGACGACTCGGCCCTGTATCTCTGTGCCAGCAGCTGGGGGGGGAGACAGCATCGGGACACCATATATTTTGGAGAG	CASSWGGRQHRDTIYF	6	5.32099e-05	TCRBV05-04*01	TCRBD02-01*01	TCRBJ01-03*01
GAATGTGAACGCCTTGTTGCTGGGGACTCGGCCCTGTATCTCTGTGCCAGCAGCTTATTGGGGAGGCCACCCCTCCACTTTGGGAAC	CASSLLGRPPLHF	6	5.32099e-05	TCRBV05-05*01	TCRBD02-01*02	TCRBJ01-06*01
ACAGTGACCAGTGCCCATCCTGAAGACAGCAGCTTCTACATCTGCAGTGCCAAAGGGGCGGGGGACACTGAAGCTTTCTTTGGACAA	CSAKGAGDTEAFF	6	5.32099e-05	TCRBV20	TCRBD02-01*01	TCRBJ01-01*01
AGGCTGGAGTTGGCTGCTCCCTCCCAGACATCTGTGTACTTCTGTGCCAGCAGTTACTCGGGCAATCAGCCCCAGCATTTTGGTGAT	CASSYSGNQPQHF	6	5.32099e-05	TCRBV06-06	unknown	TCRBJ01-05*01
TCCACAAAGCTGGAGGACTCAGCCATGTACTTCTGTGCCAGCAGACCCGGACAGGGATCGAACACCGGGGAGCTGTTTTTTGGAGAA	CASRPGQGSNTGELFF	6	5.32099e-05	TCRBV02-01*01	TCRBD01-01*01	TCRBJ02-02*01
CGCACAGAGCAGCGGGACTCGGCCATGTATCGCTGTGCCAGCAGCTTAGAGGGAGGGTTAGCGGGGGACGAGCAGTACTTCGGGCCG	CASSLEGGLAGDEQYF	6	5.32099e-05	TCRBV07-06*01	TCRBD02-01*01	TCRBJ02-07*01
ACAGTGACCAGTGCCCATCCTGAAGACAGCAGCTTCTACATCTGCAGTGCTTGGGACAGTTCAAGATATGGCTACACCTTCGGTTCG	CSAWDSSRYGYTF	6	5.32099e-05	TCRBV20	TCRBD01-01*01	TCRBJ01-02*01
CATCCTGAAGACAGCAGCTTCTACATCTGCAGTGCTAGAGGTCGGAGCAGATCCGGGAGTTATAATTCACCCCTCCACTTTGGGAAC	CSARGRSRSGSYNSPLHF	6	5.32099e-05	TCRBV20	TCRBD02-01*02	TCRBJ01-06*01
CAGCGCACAGAGCAGGGGGACTCGGCCATGTATCTCTGTGCCAGCAGCTTCCCCGGACAGGGGGCTTACGAGCAGTACTTCGGGCCG	CASSFPGQGAYEQYF	6	5.32099e-05	TCRBV07-09	TCRBD01-01*01	TCRBJ02-07*01
ACCTTGGAGCTGGGGGACTCGGCCCTTTATCTTTGCGCCAGCAGCTTGGGGGGGACTAGCGGCACAGATACGCAGTATTTTGGCCCA	CASSLGGTSGTDTQYF	6	5.32099e-05	TCRBV05-01*01	TCRBD02-01	TCRBJ02-03*01
CAGCCTGCAGAGCTTGGGGACTCGGCCGTGTATCTCTGTGCCAGCAGCTTAGATCCTGGGGCTAACTATGGCTACACCTTCGGTTCG	CASSLDPGANYGYTF	6	5.32099e-05	TCRBV11-03*01	unknown	TCRBJ01-02*01
TCTGCCAGGCCCTCACATACCTCTCAGTACCTCTGTGCCAGCAGTGAACACGGGACAGGGGCTAACTATGGCTACACCTTCGGTTCG	CASSEHGTGANYGYTF	6	5.32099e-05	TCRBV25-01*01	TCRBD01-01*01	TCRBJ01-02*01
CTGTCGGCTGCTCCCTCCCAGACATCTGTGTACTTCTGTGCCAGCAGTTACGTTGGGGGCCTCCAAGAGACCCAGTACTTCGGGCCA	CASSYVGGLQETQYF	6	5.32099e-05	TCRBV06-05*01	TCRBD01-01*01	TCRBJ02-05*01
AGCAACATGAGCCCTGAAGACAGCAGCATATATCTCTGCAGCGTTGAAGACTGGACCCTAACGGGCACTGAAGCTTTCTTTGGACAA	CSVEDWTLTGTEAFF	6	5.32099e-05	TCRBV29-01*01	unknown	TCRBJ01-01*01
ATCCAGCCCTCAGAACCCAGGGACTCAGCTGTGTATTTTTGTGCTAGTGGTTCCCCCCGGGACTACTACGAGCAGTACTTCGGGCCG	CASGSPRDYYEQYF	5	4.43416e-05	TCRBV12-05*01	TCRBD02-01	TCRBJ02-07*01
AATGTGAATGCCTTGGAGCTGGAGGACTCGGCCCTGTATCTCTGTGCCAGTAAACCGGGACCGGGCTCACCCCTCCACTTTGGGAAC	CASKPGPGSPLHF	5	4.43416e-05	TCRBV05-08*01	unknown	TCRBJ01-06*01
CTACACGCCCTGCAGCCAGAAGACTCAGCCCTGTATCTCTGCGCCAGCAGCCAAGGACAGGCATCCTACGAGCAGTACTTCGGGCCG	CASSQGQASYEQYF	5	4.43416e-05	TCRBV04-01*01	TCRBD01-01*01	TCRBJ02-07*01
ACCAGTGCCCATCCTGAAGACAGCAGCTTCTACATCTGCAGTGCTAGAGATGCGGCTAGCCGATCCAATGAGCAGTTCTTCGGGCCA	CSARDAASRSNEQFF	5	4.43416e-05	TCRBV20	TCRBD02-01	TCRBJ02-01*01
TCGGCTGCTCCCTCCCAGACATCTGTGTACTTCTGTGCCAGCAGTTACAGACAGGGGGGGCTGAGTGAAAAACTGTTTTTTGGCAGT	CASSYRQGGLSEKLFF	5	4.43416e-05	TCRBV06-05*01	TCRBD01-01*01	TCRBJ01-04*01
TTGCTGGGGGACTCGGCCCTCTATCTCTGTGCCAGCAGAACCTGGGGACAGGGGACCTCTGGGGCCAACGTCCTGACTTTCGGGGCC	CASRTWGQGTSGANVLTF	5	4.43416e-05	TCRBV05-06*01	TCRBD01-01*01	TCRBJ02-06*01
GTGAACGCCTTGTTGCTGGGGGACTCGGCCCTGTATCTCTGTGCCAGCAGCTCCGGGACAGGGGTAGACGAGCAGTACTTCGGGCCG	CASSSGTGVDEQYF	5	4.43416e-05	TCRBV05-05*01	TCRBD01-01*01	TCRBJ02-07*01
CTGAGGATCCAGCAGGTAGTGCGAGGAGATTCGGCAGCTTATTTCTGTGCCAGCTCACCACTCATTACTGAAGCTTTCTTTGGACAA	CASSPLITEAFF	5	4.43416e-05	TCRBV18-01*01	TCRBD01-01*01	TCRBJ01-01*01
CCTGCAAAGCTTGAGGACTCGGCCGTGTATCTCTGTGCCAGCAGCTACCCAACGACAGGGGACAATGAAAAACTGTTTTTTGGCAGT	CASSYPTTGDNEKLFF	5	4.43416e-05	TCRBV11-02*02	TCRBD01-01*01	TCRBJ01-04*01
GTGAGCACCTTGGAGCTGGGGGACTCGGCCCTTTATCTTTGCGCCAGCAGCGATCAGGGAATTCAGACTGAAGCTTTCTTTGGACAA	CASSDQGIQTEAFF	5	4.43416e-05	TCRBV05-01*01	TCRBD01-01*01	TCRBJ01-01*01
GCTCCCTCCCAGACATCTGTGTACTTCTGTGCCAGCGGTAAAAAGGGACAGGCGCGTCCCGGGTCCTACGAGCAGTACTTCGGGCCG	CASGKKGQARPGSYEQYF	5	4.43416e-05	TCRBV06	TCRBD01-01*01	TCRBJ02-07*01
ACCCTGCAGCCAGAAGACTCGGCCCTGTATCTCTGCGCCAGCAGCCAGCTTACAGGGGCGCCGAGGACTGAAGCTTTCTTTGGACAA	CASSQLTGAPRTEAFF	5	4.43416e-05	TCRBV04-03*01	TCRBD01-01*01	TCRBJ01-01*01
ATCCAGCGCACAGAGCAGGGGGACTCGGCCATGTATCTCTGTGCCAGCAGCCCCCAGGGAAGTTCTTCACCCCTCCACTTTGGGAAC	CASSPQGSSSPLHF	5	4.43416e-05	TCRBV07-09	TCRBD01-01*01	TCRBJ01-06*01
CGCACAGAGCGGGGGGACTCAGCCGTGTATCTCTGTGCCAGCAGCTTACTGCCCTCTTTTATGAACACTGAAGCTTTCTTTGGACAA	CASSLLPSFMNTEAFF	5	4.43416e-05	TCRBV07-03*01	unknown	TCRBJ01-01*01
ACCTTGGAGCTGGGGGACTCGGCCCTTTATCTTTGCGCCAGCAGCCACCCCAAGGAGGGGTACACCGGGGAGCTGTTTTTTGGAGAA	CASSHPKEGYTGELFF	5	4.43416e-05	TCRBV05-01*01	TCRBD02-01*02	TCRBJ02-02*01
CCAGAAGACTCGGCCCTGTATCTCTGTGCCAGCAGCCAACTACCGGGACTAGCGGGGGGCCTCCAAGAGACCCAGTACTTCGGGCCA	CASSQLPGLAGGLQETQYF	5	4.43416e-05	TCRBV04-02*01	TCRBD02-01*01	TCRBJ02-05*01
CAGCGCACACAGCAGGAGGACTCCGCCGTGTATCTCTGTGCCAGCAGCTTTGCGGGGGCCAGCACAGATACGCAGTATTTTGGCCCA	CASSFAGASTDTQYF	5	4.43416e-05	TCRBV07-08*01	TCRBD02-01*01	TCRBJ02-03*01
CAGCCCTCAGAACCCAGGGACTCAGCTGTGTACTTCTGTGCCAGCAGTTTAGCGACAGGGGGCTTTCAGCCCCAGCATTTTGGTGAT	CASSLATGGFQPQHF	5	4.43416e-05	TCRBV12	TCRBD01-01*01	TCRBJ01-05*01
ATCCAGCGCACACAGCAGGAGGACTCGGCCGTGTATCTCTGTGCCAGCAGCTTGACAGGGGTGGGTGAAAAACTGTTTTTTGGCAGT	CASSLTGVGEKLFF	5	4.43416e-05	TCRBV07-02*01	TCRBD01-01*01	TCRBJ01-04*01
TGTGAGCACCTTGGAGCTGGGGACTCGGCCCTTTATCTTTGCGCCAGCAGCTGGGGACAGGGGGCCGGGGAGCTGTTTTTTGGAGAA	CASSWGQGAGELFF	5	4.43416e-05	TCRBV05-01*01	TCRBD01-01*01	TCRBJ02-02*01
CACATCAATTCCCTGGAGCTTGGTGACTCTGCTGTGTATTTCTGTGCCAGCAGCCAACCCCAGGGGGCCGCGCAGTATTTTGGCCCA	CASSQPQGAAQYF	5	4.43416e-05	TCRBV03	TCRBD01-01*01	TCRBJ02-03*01
GAGTCGGCTGCTCCCTCCCAAACATCTGTGTACTTCTGTGCCAGCAGTTACGTTCAGGGGGTTTCCTACGAGCAGTACTTCGGGCCG	CASSYVQGVSYEQYF	5	4.43416e-05	TCRBV06	TCRBD01-01*01	TCRBJ02-07*01
TTGGAGCTGGGGGACTCGGCCCTTTATCTTTGCGCCAGCAGCTTTGGGACTAGCGGGGGGGAGACAGATACGCAGTATTTTGGCCCA	CASSFGTSGGETDTQYF	5	4.43416e-05	TCRBV05-01*01	TCRBD02-01*01	TCRBJ02-03*01
GTGAGCAACATGAGCCCTGAAGACAGCAGCATATATCTCTGCAGCGTAGCCAAGAGCGAATCGGGAACTGAAGCTTTCTTTGGACAA	CSVAKSESGTEAFF	5	4.43416e-05	TCRBV29-01*01	TCRBD02-01*02	TCRBJ01-01*01
GAGTCAGCTGCTCCCTCCCAGACATCTGTGTACTTCTGTGCCAGCCCCGGGGGCGGGGGGGCCCAAGAGACCCAGTACTTCGGGCCA	CASPGGGGAQETQYF	5	4.43416e-05	TCRBV06	TCRBD02-01*01	TCRBJ02-05*01
AAGATCCAGCCCTCAGAACCCAGGGACTCAGCTGTGTACTTCTGTGCCAGCGGAGACAGGGCGGGCTATGGCTACACCTTCGGTTCG	CASGDRAGYGYTF	5	4.43416e-05	TCRBV12	TCRBD01-01*01	TCRBJ01-02*01
ATCCAGCCTGCAAAGCTTGAGGACTCGGCCGTGTATCTCTGTGCCAGCAGCTTCCCGGGACAGGGGAACGAGCAGTACTTCGGGCCG	CASSFPGQGNEQYF	5	4.43416e-05	TCRBV11-02*02	TCRBD01-01*01	TCRBJ02-07*01
CTACACGCCCTGCAGCCAGAAGACTCAGCCCTGTATCTCTGCGCCAGCAGCCAAGTACGGTTTAATCAGCCCCAGCATTTTGGTGAT	CASSQVRFNQPQHF	5	4.43416e-05	TCRBV04-01*01	TCRBD02-01	TCRBJ01-05*01
TCTGCCATCCCCAACCAGACAGCTCTTTACTTCTGTGCCACCAGTGATTCCCAGGGGGCATCCTACAATGAGCAGTTCTTCGGGCCA	CATSDSQGASYNEQFF	5	4.43416e-05	TCRBV24	TCRBD01-01*01	TCRBJ02-01*01
CAGCGCACAGAGCAGCGGGACTCAGCCATGTATCGCTGTGCCAGCAGCTTAGCTTTCGGGGTCGAACATACGCAGTATTTTGGCCCA	CASSLAFGVEHTQYF	5	4.43416e-05	TCRBV07-07*01	TCRBD02-01*01	TCRBJ02-03*01
CTACACACCCTGCAGCCAGAAGACTCGGCCCTGTATCTCTGCGCCAGCAGCCGGCAACAGGGGGCGGATACGCAGTATTTTGGCCCA	CASSRQQGADTQYF	5	4.43416e-05	TCRBV04-03*01	TCRBD01-01*01	TCRBJ02-03*01
CAGCGCACAGAGCAGGGGGACTCGGCCATGTATCTCTGTGCCAGCAGCCCAGAGGGAATTAGCAATCAGCCCCAGCATTTTGGTGAT	CASSPEGISNQPQHF	5	4.43416e-05	TCRBV07-09	TCRBD02-01*02	TCRBJ01-05*01
GTGAGCACCTTGGAGCTGGGGGACTCGGCCCTTTATCTTTGCGCCAGCAGCTTGGGACATGGGAACTACGAGCAGTACTTCGGGCCG	CASSLGHGNYEQYF	5	4.43416e-05	TCRBV05-01*01	unknown	TCRBJ02-07*01
GCTGCTCCCTCCCAGACATCTGTGTACTTCTGTGCCAGCACCTCCTCGGCCGGCAGGGGTACGTCCGGGGAGCTGTTTTTTGGAGAA	CASTSSAGRGTSGELFF	5	4.43416e-05	TCRBV06	TCRBD01-01*01	TCRBJ02-02*01
CTGACAGTGACCAGTGCCCATCCTGAAGACAGCAGCTTCTACATCTGCAGTGCTAGAGTACCCGGCAATGAGCAGTTCTTCGGGCCA	CSARVPGNEQFF	5	4.43416e-05	TCRBV20	TCRBD02-01	TCRBJ02-01*01
AAGATCCAGCCTGCAAAGCTTGAGGACTCGGCCGTGTATCTCTGTGCCAGCAGCTTAGGGGCCACCTACGAGCAGTACTTCGGGCCG	CASSLGATYEQYF	5	4.43416e-05	TCRBV11-02*02	TCRBD01-01*01	TCRBJ02-07*01
AACATGAGCTCCTTGGAGCTGGGGGACTCAGCCCTGTACTTCTGTGCCAGCAGCTTAGGCAGGGGGCGCGAGCAGTACTTCGGGCCG	CASSLGRGREQYF	5	4.43416e-05	TCRBV13-01*01	TCRBD01-01*01	TCRBJ02-07*01
ACTGTGAGCAACATGAGCCCTGAAGACAGCAGCATATATCTCTGCAGCGCCCGGGCGGGGTTGAACACTGAAGCTTTCTTTGGACAA	CSARAGLNTEAFF	5	4.43416e-05	TCRBV29-01*01	TCRBD02-01*01	TCRBJ01-01*01
GTGACCAGTGCCCATCCTGAAGACAGCAGCTTCTACATCTGCAGTGCTAAGGCAAACAGGGGGGACTATGGCTACACCTTCGGTTCG	CSAKANRGDYGYTF	5	4.43416e-05	TCRBV20	TCRBD01-01*01	TCRBJ01-02*01
GAGATCCAGCGCACAGAGCAGGGGGACTCGGCCATGTATCTCTGTGCCAGCAGTGTAGTCGGTACCTACGAGCAGTACTTCGGGCCG	CASSVVGTYEQYF	5	4.43416e-05	TCRBV07-09	TCRBD02-01	TCRBJ02-07*01
AAGATCCGGTCCACAAAGCTGGAGGACTCAGCCATGTACTTCTGTGCCAGCAGTGAAGCGCTGGGGAATGAGCAGTTCTTCGGGCCA	CASSEALGNEQFF	5	4.43416e-05	TCRBV02-01*01	unknown	TCRBJ02-01*01
CGGTCCACAAAGCTGGAGGACTCAGCCATGTACTTCTGTGCCAGCAAGGTGGGGCAGAGGAACACCGGGGAGCTGTTTTTTGGAGAA	CASKVGQRNTGELFF	5	4.43416e-05	TCRBV02-01*01	TCRBD01-01*01	TCRBJ02-02*01
ATCAATTCCCTGGAGCTTGGTGACTCTGCTGTGTATTTCTGTGCCAGCAGCCAACAATCCTCTGGGTACGAGCAGTACTTCGGGCCG	CASSQQSSGYEQYF	5	4.43416e-05	TCRBV03	unknown	TCRBJ02-07*01
TCGGCTGCTCCCTCCCAAACATCTGTGTACTTCTGTGCCAGCAGTTACCCGGAGCAGCCCTTGAATCAGCCCCAGCATTTTGGTGAT	CASSYPEQPLNQPQHF	5	4.43416e-05	TCRBV06	TCRBD02-01*02	TCRBJ01-05*01
GCAAAGCTTGAGGACTCGGCCGTGTATCTCTGTGCCAGCAGCTTAGAGGTCGGCAGGGGGCGGGCAGATACGCAGTATTTTGGCCCA	CASSLEVGRGRADTQYF	5	4.43416e-05	TCRBV11-02*02	TCRBD01-01*01	TCRBJ02-03*01
ATCCAGCGCACAGAGCAGGGGGACTCGGCCATGTATCTCTGTGCCAGCAGCTGGGCCGGGACTGTGAATGAAGCTTTCTTTGGACAA	CASSWAGTVNEAFF	5	4.43416e-05	TCRBV07-09	TCRBD02-01	TCRBJ01-01*01
CCCTCAGAACCCAGGGACTCAGCTGTGTACTTCTGTGCCAGCAGTGCTGGGACTAGCGGGGGGGGAGAGACCCAGTACTTCGGGCCA	CASSAGTSGGGETQYF	5	4.43416e-05	TCRBV12	TCRBD02-01*01	TCRBJ02-05*01
GCTCCCTCCCAGACATCTGTGTACTTCTGTGCCAGCAGTTACTCGAACAGGGGGGAGTATAGCAATCAGCCCCAGCATTTTGGTGAT	CASSYSNRGEYSNQPQHF	5	4.43416e-05	TCRBV06	TCRBD01-01*01	TCRBJ01-05*01
CTGGAGTCCGCTACCAGCTCCCAGACATCTGTGTACTTCTGTGCCATCAGTGACGTCAACAGGGACACTGAAGCTTTCTTTGGACAA	CAISDVNRDTEAFF	5	4.43416e-05	TCRBV10-03*01	TCRBD01-01*01	TCRBJ01-01*01
TCCCTAGAGTCTGCCATCCCCAACCAGACAGCTCTTTACTTCTGTGCCACCAGTGCCGGCAGTAACTATGGCTACACCTTCGGTTCG	CATSAGSNYGYTF	5	4.43416e-05	TCRBV24	unknown	TCRBJ01-02*01
CGCACAGAGCAGGGGGACTCGGCCATGTATCTCTGTGCCAGCAGCTCACGGGCGAGACTAGCGGGTGAGACCCAGTACTTCGGGCCA	CASSSRARLAGETQYF	5	4.43416e-05	TCRBV07-09	TCRBD02-01	TCRBJ02-05*01
TTGTTGCTGGGGGACTCGGCCCTCTATCTCTGTGCCAGCAGCTTGACGGGACAGTCGTTCTCTGGAAACACCATATATTTTGGAGAG	CASSLTGQSFSGNTIYF	5	4.43416e-05	TCRBV05-06*01	TCRBD01-01*01	TCRBJ01-03*01
GCTCCCTCCCAGACATCTGTGTACTTCTGTGCCAGCAGTTACTCGAACCGGGACAGATTTAGCAATCAGCCCCAGCATTTTGGTGAT	CASSYSNRDRFSNQPQHF	5	4.43416e-05	TCRBV06	TCRBD01-01*01	TCRBJ01-05*01
ATCCTGGAGTCGCCCAGCCCCAACCAGACCTCTCTGTACTTCTGTGCCAGCAGTTTAAGGGGGAGCACTGAAGCTTTCTTTGGACAA	CASSLRGSTEAFF	5	4.43416e-05	TCRBV27-01*01	TCRBD01-01*01	TCRBJ01-01*01
CAGCCTGCAAAGCTTGAGGACTCGGCCGTGTATCTCTGTGCCAGCAGCATTCAGCGGGGGGGCCAAGAGACCCAGTACTTCGGGCCA	CASSIQRGGQETQYF	5	4.43416e-05	TCRBV11-02*02	TCRBD02-01*01	TCRBJ02-05*01
AGGATCCAGCAGGTAGTGCGAGGAGATTCGGCAGCTTATTTCTGTGCCAGCTCACCACCGGGACTAGCTGAGCAGTACTTCGGGCCG	CASSPPGLAEQYF	5	4.43416e-05	TCRBV18-01*01	TCRBD02-01	TCRBJ02-07*01
ATCCAGCCCTCAGAACCCAGGGACTCAGCTGTGTACTTCTGTGCCAGCAGTTTACTTATGAGCTCCTACGAGCAGTACTTCGGGCCG	CASSLLMSSYEQYF	5	4.43416e-05	TCRBV12	TCRBD02-01*02	TCRBJ02-07*01
TCTCTGGAGCTGGGGGACTCAGCTTTGTATTTCTGTGCCAGCAGCCCCCGGGACAGGGTGGCTTCTAATGGCTACACCTTCGGTTCG	CASSPRDRVASNGYTF	5	4.43416e-05	TCRBV09-01	TCRBD01-01*01	TCRBJ01-02*01
CAGCGCACACAGCAGGAGGACTCCGCCGTGTATCTCTGTGCCAGCAGCATGGGGGGTGTCCGCTACAATGAGCAGTTCTTCGGGCCA	CASSMGGVRYNEQFF	5	4.43416e-05	TCRBV07-08*01	TCRBD02-01*01	TCRBJ02-01*01
CTGGAGTCGCCCAGCCCCAACCAGACCTCTCTGTACTTCTGTGCCAGCAGTTCCTTTAGGGATAATGAAAAACTGTTTTTTGGCAGT	CASSSFRDNEKLFF	5	4.43416e-05	TCRBV27-01*01	unknown	TCRBJ01-04*01
ACGATCCAGCGCACACAGCAGGAGGACTCGGCCGTGTATCTCTGTGCCAGCAGCTTAGACCAGAATCGTCCGCAGTTCTTCGGGCCA	CASSLDQNRPQFF	5	4.43416e-05	TCRBV07-02*01	TCRBD01-01*01	TCRBJ02-01*01
CAGCGCACAGAGCAGGGGGACTCGGCCATGTATCTCTGTGCCAGCAGCTTAGAGAGGCTACTCTACAATGAGCAGTTCTTCGGGCCA	CASSLERLLYNEQFF	5	4.43416e-05	TCRBV07-09	TCRBD02-01*02	TCRBJ02-01*01
TCCCAGACATCTGTGTACTTCTGTGCCAGCAGTGCGACAGGACAGGGGAGGCGGATCGGCGGATCCTACGAGCAGTACTTCGGGCCG	CASSATGQGRRIGGSYEQYF	5	4.43416e-05	TCRBV06-01*01	TCRBD01-01*01	TCRBJ02-07*01
GAGTCCGCTACCAGCTCCCAGACATCTGTGTACTTCTGTGCCATCAGTGAGTCCGGGAGGAGTAATTCACCCCTCCACTTTGGGAAC	CAISESGRSNSPLHF	5	4.43416e-05	TCRBV10-03*01	TCRBD02-01*02	TCRBJ01-06*01
AAGATCCGGTCCACAAAGCTGGAGGACTCAGCCATGTACTTCTGTGCCAGCAAGCAGGACAGCTCCTACGAGCAGTACTTCGGGCCG	CASKQDSSYEQYF	5	4.43416e-05	TCRBV02-01*01	TCRBD01-01*01	TCRBJ02-07*01
AACGCCTTGTTGCTGGGGGACTCGGCCCTCTATCTCTGTGCCAGCAGCTTCGAGCGGACAGGGGGTAATGAGCAGTTCTTCGGGCCA	CASSFERTGGNEQFF	5	4.43416e-05	TCRBV05-06*01	TCRBD01-01*01	TCRBJ02-01*01
AACGCCTTGTTGCTGGGGGACTCGGCCCTGTATCTCTGTGCCAGCAGCTTGGCCTCCGCCTTCGACTACGAGCAGTACTTCGGGCCG	CASSLASAFDYEQYF	5	4.43416e-05	TCRBV05-05*01	unknown	TCRBJ02-07*01
CTGCAGCCAGAAGACTCGGCCCTGTATCTCTGCGCCAGCAGCCAAGATAACCGGGGGGGAAACTACAATGAGCAGTTCTTCGGGCCA	CASSQDNRGGNYNEQFF	5	4.43416e-05	TCRBV04-03*01	TCRBD02-01*01	TCRBJ02-01*01
TCTCTGGAGCTGGGGGACTCAGCTTTGTATTTCTGTGCCAGCAGCGTACCCGGGGCGGGGGCCGAAGATACGCAGTATTTTGGCCCA	CASSVPGAGAEDTQYF	5	4.43416e-05	TCRBV09-01	TCRBD02-01*01	TCRBJ02-03*01
CAGCCTGCAGAGCTTGGGGACTCGGCCGTGTATCTCTGTGCCAGCAGCTTACTAGCGGGGGGCTTCCATGAGCAGTTCTTCGGGCCA	CASSLLAGGFHEQFF	5	4.43416e-05	TCRBV11-03*01	TCRBD02-01*01	TCRBJ02-01*01
CTACACGCCCTGCAGCCAGAAGACTCAGCCCTGTATCTCTGCGCCAGCAGCCAAGATCCGGGCCCGGAGACCCAGTACTTCGGGCCA	CASSQDPGPETQYF	5	4.43416e-05	TCRBV04-01*01	unknown	TCRBJ02-05*01
CTGATTCTGGAGTCCGCCAGCACCAACCAGACATCTATGTACCTCTGTGCCAGCAGTTTTGAGGGCTCTGAAGCTTTCTTTGGACAA	CASSFEGSEAFF	5	4.43416e-05	TCRBV28-01*01	TCRBD02-01*02	TCRBJ01-01*01
ACTCTGAAGATCCAGCGCACACAGCAGGAGGACTCCGCCGTGTATCTCTGTGCCAGCAGCTCAAAAACTGAAGCTTTCTTTGGACAA	CASSSKTEAFF	5	4.43416e-05	TCRBV07-08*01	TCRBD01-01*01	TCRBJ01-01*01
CAGCCCTCAGAACCCAGGGACTCAGCTGTGTACTTCTGTGCCAGCAGTTTAATGAAGGGGAGCACAGATACGCAGTATTTTGGCCCA	CASSLMKGSTDTQYF	5	4.43416e-05	TCRBV12	TCRBD01-01*01	TCRBJ02-03*01
ACTGTGAGCAACATGAGCCCTGAAGACAGCAGCATATATCTCTGCAGCGGCGGACAACTATCCCCAGAGACCCAGTACTTCGGGCCA	CSGGQLSPETQYF	5	4.43416e-05	TCRBV29-01*01	TCRBD01-01*01	TCRBJ02-05*01
CAGCGCACACAGCAGGAGGACTCGGCCGTGTATCTCTGTGCCAGCAGCGAAGGGACAGCTTTAGACGGTGAGCAGTTCTTCGGGCCA	CASSEGTALDGEQFF	5	4.43416e-05	TCRBV07-02*01	TCRBD01-01*01	TCRBJ02-01*01
TCGCCCAGCCCCAACCAGACCTCTCTGTACTTCTGTGCCAGCAGTCCCGGACTAGCGGTAGCCACAGATACGCAGTATTTTGGCCCA	CASSPGLAVATDTQYF	5	4.43416e-05	TCRBV27-01*01	TCRBD02-01	TCRBJ02-03*01
CAGCGCACAGAGCAGGGGGACTCGGCCATGTATCTCTGTGCCAGCAGCCTATTCTCGGGCGGCGGCACTGAAGCTTTCTTTGGACAA	CASSLFSGGGTEAFF	5	4.43416e-05	TCRBV07-09	unknown	TCRBJ01-01*01
CAGCGCACAGAGCGGGGGGACTCAGCCGTGTATCTCTGTGCCAGCAGCCCCGCCAGGACTAGGTCGGAGACCCAGTACTTCGGGCCA	CASSPARTRSETQYF	5	4.43416e-05	TCRBV07-03*01	TCRBD02-01	TCRBJ02-05*01
CTACACGCCCTGCAGCCAGAAGACTCAGCCCTGTATCTCTGCGCCAGCAGCCGGGACAGGGAAGACTCACCCCTCCACTTTGGGAAC	CASSRDREDSPLHF	5	4.43416e-05	TCRBV04-01*01	TCRBD01-01*01	TCRBJ01-06*01
GAGTCGGCTGCTCCCTCCCAGACATCTGTGTACTTCTGTGCCAGCATCCAAAGGGGGGGCGCAGGCTATGGCTACACCTTCGGTTCG	CASIQRGGAGYGYTF	5	4.43416e-05	TCRBV06-01*01	TCRBD02-01*01	TCRBJ01-02*01
GGGTTGGAGTCGGCTGCTCCCTCCCAAACATCTGTGTACTTCTGTGCCAGCAGTTACGGGCAGCCCAGCGAGCAGTACTTCGGGCCG	CASSYGQPSEQYF	5	4.43416e-05	TCRBV06	TCRBD01-01*01	TCRBJ02-07*01
GTGACCAGTGCCCATCCTGAAGACAGCAGCTTCTACATCTGCAGTGCTAGGGCGGTGGGAATCAATCAGCCCCAGCATTTTGGTGAT	CSARAVGINQPQHF	5	4.43416e-05	TCRBV20	unknown	TCRBJ01-05*01
ACCAGTGCCCATCCTGAAGACAGCAGCTTCTACATCTGCAGTGCTAGAGTTAGGGGGCGCGTTAATGAAAAACTGTTTTTTGGCAGT	CSARVRGRVNEKLFF	5	4.43416e-05	TCRBV20	TCRBD01-01*01	TCRBJ01-04*01
ACCAGTGCCCATCCTGAAGACAGCAGCTTCTACATCTGCAGTGCCCTTCCCCCGACAGGGGAGCCCGGGGAGCTGTTTTTTGGAGAA	CSALPPTGEPGELFF	5	4.43416e-05	TCRBV20	TCRBD01-01*01	TCRBJ02-02*01
AGTGCCCATCCTGAAGACAGCAGCTTCTACATCTGCAGTGCCCCAAGTCACACGGGGGACCACCAAGAGACCCAGTACTTCGGGCCA	CSAPSHTGDHQETQYF	5	4.43416e-05	TCRBV20	TCRBD02-01*01	TCRBJ02-05*01
CTGAGCTCTCTGGAGCTGGGGGACTCAGCTTTGTATTTCTGTGCCAGCAGCGCGGGGACTATACAAGAGACCCAGTACTTCGGGCCA	CASSAGTIQETQYF	5	4.43416e-05	TCRBV09-01	TCRBD02-01	TCRBJ02-05*01
AATTCCCTGGAGCTTGGTGACTCTGCTGTGTATTTCTGTGCCAGCAGCCATGGACTGTTGGACATCCGCGAGCAGTACTTCGGGCCG	CASSHGLLDIREQYF	5	4.43416e-05	TCRBV03	unknown	TCRBJ02-07*01
CTGAAGATCCAGCCCTCAGAACCCAGGGACTCAGCTGTGTACTTCTGTGCCAGCAGTTTGGGTGGCTCGCCCCAGCATTTTGGTGAT	CASSLGGSPQHF	5	4.43416e-05	TCRBV12	unknown	TCRBJ01-05*01
GAGATCCAGCGCACAGAGCAGGGGGACTCGGCCATGTATCTCTGTGCCAGCAGCTTGAACAGGGACCGAGGCTACACCTTCGGTTCG	CASSLNRDRGYTF	5	4.43416e-05	TCRBV07-09	TCRBD01-01*01	TCRBJ01-02*01
CTGAAGATCCGGTCCACAAAGCTGGAGGACTCAGCCATGTACTTCTGTGCCAGCATAAGGCAGGGCAATGAGCAGTTCTTCGGGCCA	CASIRQGNEQFF	5	4.43416e-05	TCRBV02-01*01	TCRBD01-01*01	TCRBJ02-01*01
ACTCTGGAGTCTGCTGCCTCCTCCCAGACATCTGTATATTTCTGCGCCAGCAGAGACAGGGCGAGCTATGGCTACACCTTCGGTTCG	CASRDRASYGYTF	5	4.43416e-05	TCRBV10-01	TCRBD01-01*01	TCRBJ01-02*01
AGCACCTTGGAGCTGGGGGACTCGGCCCTTTATCTTTGCGCCAGCAGCCCCGGACAGGGGTTAAACACTGAAGCTTTCTTTGGACAA	CASSPGQGLNTEAFF	5	4.43416e-05	TCRBV05-01*01	TCRBD01-01*01	TCRBJ01-01*01
CAGCCAGAAGACTCGGCCCTGTATCTCTGTGCCAGCAGCCAAGGAGGGACAGGGCCGAGGGCGAAAGAGACCCAGTACTTCGGGCCA	CASSQGGTGPRAKETQYF	5	4.43416e-05	TCRBV04-02*01	TCRBD01-01*01	TCRBJ02-05*01
CTGGAGGACTCAGCCATGTACTTCTGTGCCAGCAGTCCCCCCGGGGGCTGGGGATCTCTAGCCAAAAACATTCAGTACTTCGGCGCC	CASSPPGGWGSLAKNIQYF	5	4.43416e-05	TCRBV02-01*01	unknown	TCRBJ02-04*01
GAGTCAGCTACCCGCTCCCAGACATCTGTGTATTTCTGCGCCAGCAGTGAGTCCAGTGGACTGAACTATGGCTACACCTTCGGTTCG	CASSESSGLNYGYTF	5	4.43416e-05	TCRBV10-02*01	TCRBD02-01	TCRBJ01-02*01
ATCCGGTCCACAAAGCTGGAGGACTCAGCCATGTACTTCTGTGCCAGCAGTGACAGGGGCCGGTCCTACGAGCAGTACTTCGGGCCG	CASSDRGRSYEQYF	5	4.43416e-05	TCRBV02-01*01	TCRBD01-01*01	TCRBJ02-07*01
CAGCGCACAGAGCGGGGGGACTCAGCCGTGTATCTCTGTGCCAGCAGCTCCAGCGGGACCTCCTACAATGAGCAGTTCTTCGGGCCA	CASSSSGTSYNEQFF	5	4.43416e-05	TCRBV07-03*01	TCRBD02-01*02	TCRBJ02-01*01
ATCAATTCCCTGGAGCTTGGTGACTCTGCTGTGTATTTCTGTGCCAGCAGCCAAGAGGGACAGGGTTGGGGCTACACCTTCGGTTCG	CASSQEGQGWGYTF	5	4.43416e-05	TCRBV03	TCRBD01-01*01	TCRBJ01-02*01
ACAGTGACCAGTGCCCATCCTGAAGACAGCAGCTTCTACATCTGCAGTGCTAGAGGACAGGGGAACTACGAGCAGTACTTCGGGCCG	CSARGQGNYEQYF	5	4.43416e-05	TCRBV20	TCRBD01-01*01	TCRBJ02-07*01
GTGAACGCCTTGGAGCTGGACGACTCGGCCCTGTATCTCTGTGCCAGCAGCGAACAGGGATCCCTCTACGAGCAGTACTTCGGGCCG	CASSEQGSLYEQYF	5	4.43416e-05	TCRBV05-04*01	TCRBD01-01*01	TCRBJ02-07*01
CTGGAGTCAGCTACCCGCTCCCAGACATCTGTGTATTTCTGCGCCAGCAGTGGACAGGGTATAAGGGAGACCCAGTACTTCGGGCCA	CASSGQGIRETQYF	5	4.43416e-05	TCRBV10-02*01	TCRBD01-01*01	TCRBJ02-05*01
GTGAGCACCTTGGAGCTGGGGGACTCGGCCCTTTATCTTTGCGCCAGCAGCTTGGGGTTCGGACAAGAGACCCAGTACTTCGGGCCA	CASSLGFGQETQYF	5	4.43416e-05	TCRBV05-01*01	unknown	TCRBJ02-05*01
ATCCGGTCCACAAAGCTGGAGGACTCAGCCATGTACTTCTGTGCCAGCAGTGACTTGCGGGATTCCCACGAGCAGTACTTCGGGCCG	CASSDLRDSHEQYF	5	4.43416e-05	TCRBV02-01*01	TCRBD02-01*02	TCRBJ02-07*01
ATCCAGCGCACAGAGCGGGGGGACTCAGCCGTGTATCTCTGTGCCAGCAGCTTATCCCAGGGAGACAATGAGCAGTTCTTCGGGCCA	CASSLSQGDNEQFF	5	4.43416e-05	TCRBV07-03*01	unknown	TCRBJ02-01*01
CGCACAGAGCAGGGGGACTCGGCCATGTATCTCTGTGCCAGCAGCTTAGCCGCGGGGGGGCCGAACGGGGAGCTGTTTTTTGGAGAA	CASSLAAGGPNGELFF	5	4.43416e-05	TCRBV07-09	TCRBD02-01*01	TCRBJ02-02*01
TCAGCTGTGTACTTCTGTGCCAGCAGTTTAATTCGGCTAGTCGGGCGGAACTCCATATATACCACAGATACGCAGTATTTTGGCCCA	CASSLIRLVGRNSIYTTDTQYF	5	4.43416e-05	TCRBV12	unknown	TCRBJ02-03*01
GAGTCTGCCATCCCCAACCAGACAGCTCTTTACTTCTGTGCCACCAGTGATTCCGGGGCCCGCACAGATACGCAGTATTTTGGCCCA	CATSDSGARTDTQYF	5	4.43416e-05	TCRBV24	unknown	TCRBJ02-03*01
GAGTCCGCTACCAGCTCCCAGACATCTGTGTACTTCTGTGCCATCAGTGACCAGGGCCTCTCCTACAATGAGCAGTTCTTCGGGCCA	CAISDQGLSYNEQFF	5	4.43416e-05	TCRBV10-03*01	TCRBD01-01*01	TCRBJ02-01*01
AAGATCCAGCGCACACAGCAGGAGGACTCCGCCGTGTATCTCTGTGCCAGCAGTCCAAGCAGGGTTGAGACCCAGTACTTCGGGCCA	CASSPSRVETQYF	5	4.43416e-05	TCRBV07-08*01	TCRBD01-01*01	TCRBJ02-05*01
CACACCCTGCAGCCAGAAGACTCGGCCCTGTATCTCTGTGCCAGCAGTGCGACAGGGGGCTCCTACAATGAGCAGTTCTTCGGGCCA	CASSATGGSYNEQFF	5	4.43416e-05	TCRBV04-02*01	TCRBD01-01*01	TCRBJ02-01*01
AATGTGAGCACCTTGGAGCTGGGGGACTCGGCCCTTTATCTTTGCGCCAGCAGCTTGGAGGGGCGCTATGGCTACACCTTCGGTTCG	CASSLEGRYGYTF	5	4.43416e-05	TCRBV05-01*01	TCRBD01-01*01	TCRBJ01-02*01
CTGGAGCTTGGTGACTCTGCTGTGTATTTCTGTGCCAGCAGCCAACTTAGCGGGGGCGGGACCAAAAACATTCAGTACTTCGGCGCC	CASSQLSGGGTKNIQYF	5	4.43416e-05	TCRBV03	TCRBD02-01*01	TCRBJ02-04*01
CTGGAGTCTGCCAGGCCCTCACATACCTCTCAGTACCTCTGTGCCAGCAGTGAACATCCGGGAGCGGGGGAGCAGTACTTCGGGCCG	CASSEHPGAGEQYF	5	4.43416e-05	TCRBV25-01*01	TCRBD02-01*01	TCRBJ02-07*01
GTGACCAGTGCCCATCCTGAAGACAGCAGCTTCTACATCTGCAGTGCTAGGGACAGGGCTAGCACAGATACGCAGTATTTTGGCCCA	CSARDRASTDTQYF	5	4.43416e-05	TCRBV20	TCRBD01-01*01	TCRBJ02-03*01
ACGATCCAGCGCACACAGCAGGAGGACTCGGCCGTGTATCTCTGTGCCAGCAGCTTAGGGGGGCAAGAGACCCAGTACTTCGGGCCA	CASSLGGQETQYF	5	4.43416e-05	TCRBV07-02*01	unknown	TCRBJ02-05*01
ACCAGTGCCCATCCTGAAGACAGCAGCTTCTACATCTGCAGTGCTAGAGATCGGGGCAGGGCAAATCAGCCCCAGCATTTTGGTGAT	CSARDRGRANQPQHF	5	4.43416e-05	TCRBV20	unknown	TCRBJ01-05*01
TCGCTCAGGCTGGAGTCGGCTGCTCCCTCCCAGACATCTGTGTACTTCTGTGCCACGGGACAGGGCTACGAGCAGTACTTCGGGCCG	CATGQGYEQYF	5	4.43416e-05	TCRBV06-01*01	TCRBD01-01*01	TCRBJ02-07*01
CAGCGCACACAGCAGGAGGACTCGGCCGTGTATCTCTGTGCCAGCAGCTTAGCGGGACTGGGGAATTCACCCCTCCACTTTGGGAAC	CASSLAGLGNSPLHF	5	4.43416e-05	TCRBV07-02*01	TCRBD02-01	TCRBJ01-06*01
CAGCGCACACAGCAGGAGGACTCGGCCGTGTATCTCTGTGCCAGCAGCTTAAACAGGGGGCGCGGTGAAAAACTGTTTTTTGGCAGT	CASSLNRGRGEKLFF	5	4.43416e-05	TCRBV07-02*01	TCRBD01-01*01	TCRBJ01-04*01
CTGACAGTGACCAGTGCCCATCCTGAAGACAGCAGCTTCTACATCTGCAGTGCTAGAGATGGGGGGTCACCCCTCCACTTTGGGAAC	CSARDGGSPLHF	5	4.43416e-05	TCRBV20	TCRBD02-01*01	TCRBJ01-06*01
AAGATCCGGTCCACAAAGCTGGAGGACTCAGCCATGTACTTCTGTGCCAGCGGTCGGGGGCGGGGCACTGAAGCTTTCTTTGGACAA	CASGRGRGTEAFF	5	4.43416e-05	TCRBV02-01*01	unknown	TCRBJ01-01*01
CTCAGGCTGGAGTCGGCTGCTCCCTCCCAGACATCTGTGTACTTCTGTGCCAGCAGTGGAACAGGGGCGAGCTACACCTTCGGTTCG	CASSGTGASYTF	5	4.43416e-05	TCRBV06-01*01	TCRBD01-01*01	TCRBJ01-02*01
CTGAGCTCTCTGGAGCTGGGGGACTCAGCTTTGTATTTCTGTGCCAGCAGCGCCGGGACTATTCAAGAGACCCAGTACTTCGGGCCA	CASSAGTIQETQYF	5	4.43416e-05	TCRBV09-01	TCRBD02-01	TCRBJ02-05*01
GAGCTGGGGGACTCGGCCCTTTATCTTTGCGCCAGCAGCCCCCACCGCGGGGCGGGCAACTCTCAAGAGACCCAGTACTTCGGGCCA	CASSPHRGAGNSQETQYF	5	4.43416e-05	TCRBV05-01*01	TCRBD02-01*01	TCRBJ02-05*01
ACGATCCAGCGCACACAGCAGGAGGACTCGGCCGTGTATCTCTGTGCCAGCAGCCAAGGACAGAACAATGAGCAGTTCTTCGGGCCA	CASSQGQNNEQFF	5	4.43416e-05	TCRBV07-02*01	TCRBD01-01*01	TCRBJ02-01*01
CTGGAGCTTGGTGACTCTGCTGTGTATTTCTGTGCCAGCAGCCAAGATTGGACGGGAAGAGGAAATGAAAAACTGTTTTTTGGCAGT	CASSQDWTGRGNEKLFF	5	4.43416e-05	TCRBV03	TCRBD02-01*02	TCRBJ01-04*01
CGGTCCACAAAGCTGGAGGACTCAGCCATGTACTTCTGTGCCAGCAGCCCCGAGGGGGCCCTCACCTACGAGCAGTACTTCGGGCCG	CASSPEGALTYEQYF	5	4.43416e-05	TCRBV02-01*01	TCRBD01-01*01	TCRBJ02-07*01
AAGATCCAGCCTGCAGAGCTTGGGGACTCGGCCGTGTATCTCTGTGCCAGCAGCTTAGGGTTTGCTGCTGAAGCTTTCTTTGGACAA	CASSLGFAAEAFF	5	4.43416e-05	TCRBV11-03*01	unknown	TCRBJ01-01*01
ACATCGGCCCAAAAGAACCCGACAGCTTTCTATCTCTGTGCCAGTATTCCTTCCTCCAGGGCGAATCAGCCCCAGCATTTTGGTGAT	CASIPSSRANQPQHF	5	4.43416e-05	TCRBV19-01	TCRBD01-01*01	TCRBJ01-05*01
AGCTCTCTGGAGCTGGGGGACTCAGCTTTGTATTTCTGTGCCAGCAGCGTAGGGTCCGGGACCGTTGAAAAACTGTTTTTTGGCAGT	CASSVGSGTVEKLFF	5	4.43416e-05	TCRBV09-01	unknown	TCRBJ01-04*01
ACTCTGGAGTCAGCTACCCGCTCCCAGACATCTGTGTATTTCTGCGCCAGCTCATCCTCTGGGGCCAACGTCCTGACTTTCGGGGCC	CASSSSGANVLTF	5	4.43416e-05	TCRBV10-02*01	TCRBD01-01*01	TCRBJ02-06*01
AACCTGAGCTCTCTGGAGCTGGGGGACTCAGCTTTGTATTTCTGTGCCAGCAGCGTAGTCGTTGGGACTGAAGCTTTCTTTGGACAA	CASSVVVGTEAFF	5	4.43416e-05	TCRBV09-01	unknown	TCRBJ01-01*01
ATCCGGTCCACAAAGCTGGAGGACTCAGCCATGTACTTCTGTGCCAGCAAGCAGGGAGAGGGTCCTGAGACCCAGTACTTCGGGCCA	CASKQGEGPETQYF	5	4.43416e-05	TCRBV02-01*01	unknown	TCRBJ02-05*01
AAGATCCGGTCCACAAAGCTGGAGGACTCAGCCATGTACTTCTGTGCCAGCGGCAGGGGAAGTGATCAGCCCCAGCATTTTGGTGAT	CASGRGSDQPQHF	5	4.43416e-05	TCRBV02-01*01	TCRBD01-01*01	TCRBJ01-05*01
CTGGAGCTGGGGGACTCAGCTTTGTATTTCTGTGCCAGCAGCGTCCCCCGGGACTCCCAATCCTACAATGAGCAGTTCTTCGGGCCA	CASSVPRDSQSYNEQFF	5	4.43416e-05	TCRBV09-01	TCRBD02-01	TCRBJ02-01*01
CGCACACAGCAGGAGGACTCCGCCGTGTATCTCTGTGCCAGCAGCTTAGGGACTAGCGGGGCGGGGGAGACCCAGTACTTCGGGCCA	CASSLGTSGAGETQYF	5	4.43416e-05	TCRBV07-08*01	TCRBD02-01*01	TCRBJ02-05*01
TCGGCTGCTCCCTCCCAGACATCTGTGTACTTCTGTGCCAGCAGTTACTCCCGGACAGGGGGCATGCAGCCCCAGCATTTTGGTGAT	CASSYSRTGGMQPQHF	5	4.43416e-05	TCRBV06-05*01	TCRBD01-01*01	TCRBJ01-05*01
AAGAACCCGACAGCTTTCTATCTCTGTGCCAGTATCCCGGGACAGCCTAGCGGGGGGGTGTCCTACAATGAGCAGTTCTTCGGGCCA	CASIPGQPSGGVSYNEQFF	5	4.43416e-05	TCRBV19-01	TCRBD02-01*01	TCRBJ02-01*01
ACATCGGCCCAAAAGAACCCGACAGCTTTCTATCTCTGTGCCAGTAGAGGAGGGACCTCGAGGGAGGACGGCTACACCTTCGGTTCG	CASRGGTSREDGYTF	5	4.43416e-05	TCRBV19-01	TCRBD02-01*02	TCRBJ01-02*01
AAGATCCGGTCCACAAAGCTGGAGGACTCAGCCATGTACTTCTGTGCCAGCTCCGGACGTCTCGGAAACACCATATATTTTGGAGAG	CASSGRLGNTIYF	5	4.43416e-05	TCRBV02-01*01	unknown	TCRBJ01-03*01
AATTCCCTGGAGCTTGGTGACTCTGCTGTGTATTTCTGTGCCAGCAGCCCCAGACTAGGCCGCACAGATACGCAGTATTTTGGCCCA	CASSPRLGRTDTQYF	5	4.43416e-05	TCRBV03	TCRBD02-01	TCRBJ02-03*01
CCTGCAAAGCTTGAGGACTCGGCCGTGTATCTCTGTGCCAGCAGCTCCGTCTACCTCTCCCCCGACAATGAGCAGTTCTTCGGGCCA	CASSSVYLSPDNEQFF	5	4.43416e-05	TCRBV11-02*02	TCRBD02-01	TCRBJ02-01*01
CTCAGGCTGGAGTTGGCTGCTCCCTCCCAGACATCTGTGTACTTCTGTGCCAGCCGGAGCTACCCGGGGGGCTACACCTTCGGTTCG	CASRSYPGGYTF	5	4.43416e-05	TCRBV06-06	TCRBD02-01*01	TCRBJ01-02*01
AGCACCTTGGAGCTGGGGGACTCGGCCCTTTATCTTTGCGCCAGCAGCTTGGGAGGGACATCTCATTACGAGCAGTACTTCGGGCCG	CASSLGGTSHYEQYF	5	4.43416e-05	TCRBV05-01*01	TCRBD01-01*01	TCRBJ02-07*01
ACCTTGGAGCTGGGGGACTCGGCCCTTTATCTTTGCGCCAGCAGCTTGGGCGGGACTAGCGGGACAGATACGCAGTATTTTGGCCCA	CASSLGGTSGTDTQYF	5	4.43416e-05	TCRBV05-01*01	TCRBD02-01	TCRBJ02-03*01
ATCCAGCGCACAGAGCAGGGGGACTCGGCCATGTATCTCTGTGCCAGCAGCTTGGGACAGAATAACTATGGCTACACCTTCGGTTCG	CASSLGQNNYGYTF	5	4.43416e-05	TCRBV07-09	TCRBD01-01*01	TCRBJ01-02*01
CTGCTGGGGTTGGAGTCGGCTGCTCCCTCCCAAACATCTGTGTACTTCTGTGCCAGCAAAAATGATAGAGGAGCTTTCTTTGGACAA	CASKNDRGAFF	5	4.43416e-05	TCRBV06	TCRBD02-01*02	TCRBJ01-01*01
GAGATCCAGCGCACAGAGCAGGGGGACTCGGCCATGTATCTCTGTGCCAGCAGCATCCGAGGGGATCAGCCCCAGCATTTTGGTGAT	CASSIRGDQPQHF	5	4.43416e-05	TCRBV07-09	unknown	TCRBJ01-05*01
ACCTTGGAGCTGGGGGACTCGGCCCTTTATCTTTGCGCCAGCAGCTTGGACCAGAGCTCCTATAATTCACCCCTCCACTTTGGGAAC	CASSLDQSSYNSPLHF	5	4.43416e-05	TCRBV05-01*01	unknown	TCRBJ01-06*01
CAGGAGGACTCCGCCGTGTATCTCTGTGCCAGCAGCTTAGCGTTCGCGACTAGCGGGGGGACCAAAAACATTCAGTACTTCGGCGCC	CASSLAFATSGGTKNIQYF	5	4.43416e-05	TCRBV07-08*01	TCRBD02-01*01	TCRBJ02-04*01
CAGCCTGCAGAACTGGAGGATTCTGGAGTTTATTTCTGTGCCAGCAGCCTATTGGGGCCGGTCACCGGGGAGCTGTTTTTTGGAGAA	CASSLLGPVTGELFF	5	4.43416e-05	TCRBV14-01*01	TCRBD01-01*01	TCRBJ02-02*01
AAGATCCAGCCCTCAGAACCCAGGGACTCAGCTGTGTACTTCTGTGCCAGCAGTTTTAGCAACAGGGATGGCTACACCTTCGGTTCG	CASSFSNRDGYTF	5	4.43416e-05	TCRBV12	TCRBD01-01*01	TCRBJ01-02*01
CCTGCAGAACTGGAGGATTCTGGAGTTTATTTCTGTGCCAGCAGCGGCGGGGGGGCGAGCTCCTACAATGAGCAGTTCTTCGGGCCA	CASSGGGASSYNEQFF	5	4.43416e-05	TCRBV14-01*01	TCRBD02-01*01	TCRBJ02-01*01
TCGGCTGCTCCCTCCCAGACATCTGTGTACTTCTGTGCCAGCAGTTACATACGGACAGGGGGCGGCTATGGCTACACCTTCGGTTCG	CASSYIRTGGGYGYTF	5	4.43416e-05	TCRBV06-05*01	TCRBD01-01*01	TCRBJ01-02*01
ATCCAGCGCACAGAGCAGCGGGACTCGGCCATGTATCGCTGTGCCAGCAGCAAGACGGCGGACTCTTATGGCTACACCTTCGGTTCG	CASSKTADSYGYTF	5	4.43416e-05	TCRBV07-06*01	TCRBD02-01	TCRBJ01-02*01
ATCCAGCAGGTAGTGCGAGGAGATTCGGCAGCTTATTTCTGTGCCAGCTCACCACCCGCCAGACAAGAGACCCAGTACTTCGGGCCA	CASSPPARQETQYF	5	4.43416e-05	TCRBV18-01*01	TCRBD01-01*01	TCRBJ02-05*01
ATCCGGTCCACAAAGCTGGAGGACTCAGCCATGTACTTCTGTGCCAGCAGTGAACAGGGGGCAAGCTACGAGCAGTACTTCGGGCCG	CASSEQGASYEQYF	5	4.43416e-05	TCRBV02-01*01	TCRBD01-01*01	TCRBJ02-07*01
GAGTCAGCTACCCGCTCCCAGACATCTGTGTATTTCTGCGCCAGCAGTGAGCTAGCGGGGGGCTACAATGAGCAGTTCTTCGGGCCA	CASSELAGGYNEQFF	5	4.43416e-05	TCRBV10-02*01	TCRBD02-01*01	TCRBJ02-01*01
ACAGTGACCAGTGCCCATCCTGAAGACAGCAGCTTCTACATCTGCAGTGCTAGAGATAGGGCGGCCTACGAGCAGTACTTCGGGCCG	CSARDRAAYEQYF	5	4.43416e-05	TCRBV20	unknown	TCRBJ02-07*01
CTGAATGTGAACGCCTTGTTGCTGGGGGACTCGGCCCTGTATCTCTGTGCCAGCAGCGGAGATGGAGCTGAGCAGTTCTTCGGGCCA	CASSGDGAEQFF	5	4.43416e-05	TCRBV05-05*01	TCRBD02-01*02	TCRBJ02-01*01
TCCCTGGAGCTTGGTGACTCTGCTGTGTATTTCTGTGCCAGCAGCCAAGAACAACCACTAGTATCGGGTGAGCAGTTCTTCGGGCCA	CASSQEQPLVSGEQFF	5	4.43416e-05	TCRBV03	TCRBD02-01	TCRBJ02-01*01
CTGAAGATCCGGTCCACAAAGCTGGAGGACTCAGCCATGTACTTCTGTGCCAGCGGCACAGGGCATATTAGAGCTTTCTTTGGACAA	CASGTGHIRAFF	5	4.43416e-05	TCRBV02-01*01	TCRBD01-01*01	TCRBJ01-01*01
CTGTCGGCTGCTCCCTCCCAGACATCTGTGTACTTCTGTGCCAGCCGGGAGGGACAGGGGGATAACTATGGCTACACCTTCGGTTCG	CASREGQGDNYGYTF	5	4.43416e-05	TCRBV06-05*01	TCRBD01-01*01	TCRBJ01-02*01
AAGATCCGGTCCACAAAGCTGGAGGACTCAGCCATGTACTTCTGTGCCAGCGGACGGACAGATAATTCACCCCTCCACTTTGGGAAC	CASGRTDNSPLHF	5	4.43416e-05	TCRBV02-01*01	TCRBD01-01*01	TCRBJ01-06*01
CTGAGCTCTCTGGAGCTGGGGGACTCAGCTTTGTATTTCTGTGCCAGCAGCGGGACAGGGGGTGGGGAGACCCAGTACTTCGGGCCA	CASSGTGGGETQYF	5	4.43416e-05	TCRBV09-01	TCRBD01-01*01	TCRBJ02-05*01
AGTGCCCATCCTGAAGACAGCAGCTTCTACATCTGCAGTGCTAGAGACCTTAGACTAGCGGAATACAATGAGCAGTTCTTCGGGCCA	CSARDLRLAEYNEQFF	5	4.43416e-05	TCRBV20	TCRBD02-01	TCRBJ02-01*01
AAGATCCAGCGCACAGAGCGGGGGGACTCAGCCGTGTATCTCTGTGCCAGCAGCTCGACAGGCACAGATACGCAGTATTTTGGCCCA	CASSSTGTDTQYF	5	4.43416e-05	TCRBV07-03*01	TCRBD01-01*01	TCRBJ02-03*01
ACTCTGAAGATCCGGTCCACAAAGCTGGAGGACTCAGCCATGTACTTCTGTGCCAGCACTGCGTGGGAACGAGCTTTCTTTGGACAA	CASTAWERAFF	5	4.43416e-05	TCRBV02-01*01	unknown	TCRBJ01-01*01
CTGACTGTGAGCAACATGAGCCCTGAAGACAGCAGCATATATCTCTGCAGCGTTGATAAGACCCGAGATACGCAGTATTTTGGCCCA	CSVDKTRDTQYF	5	4.43416e-05	TCRBV29-01*01	unknown	TCRBJ02-03*01
TCGGCTGCTCCCTCCCAGACATCTGTGTACTTCTGTGCCAGCAGTTCCGCGGTGGGAGGGATGAACACTGAAGCTTTCTTTGGACAA	CASSSAVGGMNTEAFF	5	4.43416e-05	TCRBV06-05*01	TCRBD02-01*02	TCRBJ01-01*01
TCTCTGGAGCTGGGGGACTCAGCTTTGTATTTCTGTGCCAGCAGCGTCGGACAGGGTAGCTCCTACAATGAGCAGTTCTTCGGGCCA	CASSVGQGSSYNEQFF	5	4.43416e-05	TCRBV09-01	TCRBD01-01*01	TCRBJ02-01*01
GAGTTGGCTGCTCCCTCCCAGACATCTGTGTACTTCTGTGCCAGCACCCAGTGGGGCGGGGTATCCTACGAGCAGTACTTCGGGCCG	CASTQWGGVSYEQYF	5	4.43416e-05	TCRBV06-06	TCRBD02-01*01	TCRBJ02-07*01
GCCATCCCCAACCAGACAGCTCTTTACTTCTGTGCCACCAGTGATTTGCAACAGGGGGCTAGTGACTATGGCTACACCTTCGGTTCG	CATSDLQQGASDYGYTF	5	4.43416e-05	TCRBV24	TCRBD01-01*01	TCRBJ01-02*01
GTGACCAGTGCCCATCCTGAAGACAGCAGCTTCTACATCTGCAGTGCCCCTAAGATAGGGGAACCCTACGAGCAGTACTTCGGGCCG	CSAPKIGEPYEQYF	5	4.43416e-05	TCRBV20	TCRBD01-01*01	TCRBJ02-07*01
ACTCTGACAGTGACCAGTGCCCATCCTGAAGACAGCAGCTTCTACATCTGCAGTGCTAGTCGAGGCACTGAAGCTTTCTTTGGACAA	CSASRGTEAFF	5	4.43416e-05	TCRBV20-01*01	TCRBD02-01*02	TCRBJ01-01*01
ACATCGGCCCAAAAGAACCCGACAGCTTTCTATCTCTGTGCCAGTAGTATTTGGGGGGCAGGGCAACAGCCCCAGCATTTTGGTGAT	CASSIWGAGQQPQHF	5	4.43416e-05	TCRBV19-01	unknown	TCRBJ01-05*01
TCACCAGGCCTGGGGGACGCAGCCATGTACCTGTGTGCCACCAGCAGAGGGACAGGAACTAGCACAGATACGCAGTATTTTGGCCCA	CATSRGTGTSTDTQYF	5	4.43416e-05	TCRBV15-01*01	TCRBD01-01*01	TCRBJ02-03*01
GCCTTGGAGCTGGAGGACTCGGCCCTGTATCTCTGTGCCAGCAGCTCCTCACTTGGATCTAGCACAGATACGCAGTATTTTGGCCCA	CASSSSLGSSTDTQYF	5	4.43416e-05	TCRBV05-08*01	unknown	TCRBJ02-03*01
ACAGTGACCAGTGCCCATCCTGAAGACAGCAGCTTCTACATCTGCAGTGCTAGAGACTCTCTCACAGATACGCAGTATTTTGGCCCA	CSARDSLTDTQYF	5	4.43416e-05	TCRBV20	TCRBD02-01	TCRBJ02-03*01
GTGAACGCCTTGTTGCTGGGGGACTCGGCCCTCTATCTCTGTGCCAGCAGCTTGTCCCTAGAACGCAATGAGCAGTTCTTCGGGCCA	CASSLSLERNEQFF	5	4.43416e-05	TCRBV05-06*01	TCRBD02-01	TCRBJ02-01*01
AATGTGAACGCCTTGGAGCTGGACGACTCGGCCCTGTATCTCTGTGCCAGCGGGCAGCAGACCGGCGACACCATATATTTTGGAGAG	CASGQQTGDTIYF	5	4.43416e-05	TCRBV05-04*01	TCRBD01-01*01	TCRBJ01-03*01
CTCAGGCTGGAGTCGGCTGCTCCCTCCCAGACATCTGTGTACTTCTGTGCCAGCAGTGAGATCGGAATGACGCAGTATTTTGGCCCA	CASSEIGMTQYF	5	4.43416e-05	TCRBV06-01*01	unknown	TCRBJ02-03*01
CTGCTGTCGGCTGCTCCCTCCCAGACATCTGTGTACTTCTGTGCCAGCAGAGCCGACAGCTACACCGGGGAGCTGTTTTTTGGAGAA	CASRADSYTGELFF	5	4.43416e-05	TCRBV06-05*01	TCRBD01-01*01	TCRBJ02-02*01
CAGCCTGCAAAGCTTGAGGACTCGGCCGTGTATCTCTGTGCCAGCAGCTTAGTCGGCACTCACTCCTACGAGCAGTACTTCGGGCCG	CASSLVGTHSYEQYF	5	4.43416e-05	TCRBV11-02*02	unknown	TCRBJ02-07*01
TCCACAAAGCTGGAGGACTCAGCCATGTACTTCTGTGCCAGCGGGGCCCCCGGGGCGGCACCAAACAATGAGCAGTTCTTCGGGCCA	CASGAPGAAPNNEQFF	5	4.43416e-05	TCRBV02-01*01	unknown	TCRBJ02-01*01
TCCCTGGAGCTTGGTGACTCTGCTGTGTATTTCTGTGCCAGCAGCCCCCGTATGGGCCGGGGCACAGATACGCAGTATTTTGGCCCA	CASSPRMGRGTDTQYF	5	4.43416e-05	TCRBV03	unknown	TCRBJ02-03*01
CTTCACATCAATTCCCTGGAGCTTGGTGACTCTGCTGTGTATTTCTGTGCCAGCAGCCAAGATACAGGGTTAATGGTTTTTGGCAGT	CASSQDTGLMVF	5	4.43416e-05	TCRBV03	TCRBD01-01*01	TCRBJ01-04*01
CAGCGCACACAGCAGGAGGACTCGGCCGTGTATCTCTGTGCCAGCAGCAAAAGGACAGCAAAGAACACTGAAGCTTTCTTTGGACAA	CASSKRTAKNTEAFF	5	4.43416e-05	TCRBV07-02*01	TCRBD01-01*01	TCRBJ01-01*01
GTGCAGCCTGCAGAACTGGAGGATTCTGGAGTTTATTTCTGTGCCAGCAGCCAAGGTGACAGGGCGGGAGGCTACACCTTCGGTTCG	CASSQGDRAGGYTF	5	4.43416e-05	TCRBV14-01*01	TCRBD01-01*01	TCRBJ01-02*01
CTGACAGTGACCAGTGCCCATCCTGAAGACAGCAGCTTCTACATCTGCAGTGCTAGAGACTCTGGAAACACCATATATTTTGGAGAG	CSARDSGNTIYF	5	4.43416e-05	TCRBV20	unknown	TCRBJ01-03*01
CAGCGCACACAGCAGGAGGACTCGGCCGTGTATCTCTGTGCCAGCAGCTCACGGGTCCAGGGGGCTTCACCCCTCCACTTTGGGAAC	CASSSRVQGASPLHF	5	4.43416e-05	TCRBV07-02*01	TCRBD01-01*01	TCRBJ01-06*01
GAGTCGGCTGCTCCCTCCCAGACATCTGTGTACTTCTGTGCCAGCAGTGAGACTAGCGGGGGGCAAGAGACCCAGTACTTCGGGCCA	CASSETSGGQETQYF	5	4.43416e-05	TCRBV06-01*01	TCRBD02-01*01	TCRBJ02-05*01
ACTCTGACAGTGACCAGTGCCCATCCTGAAGACAGCAGCTTCTACATCTGCAGTGCCCCGGACTACCCTGGCTACACCTTCGGTTCG	CSAPDYPGYTF	5	4.43416e-05	TCRBV20-01*01	TCRBD02-01	TCRBJ01-02*01
AAGATCCGGTCCACAAAGCTGGAGGACTCAGCCATGTACTTCTGTGCCAGCAGGTACAGGGGCACCGGGGAGCTGTTTTTTGGAGAA	CASRYRGTGELFF	5	4.43416e-05	TCRBV02-01*01	TCRBD01-01*01	TCRBJ02-02*01
GACTCTGCTGTGTATTTCTGTGCCAGCAGCCAAGATCGTAAGGGATTAGCGGGAGAAACAGATCAAGAGACCCAGTACTTCGGGCCA	CASSQDRKGLAGETDQETQYF	5	4.43416e-05	TCRBV03	TCRBD02-01*02	TCRBJ02-05*01
CTGGAGTCGCCCAGCCCCAACCAGACCTCTCTGTACTTCTGTGCCAGCAGTTTTCGAGGGGCCAATCAGCCCCAGCATTTTGGTGAT	CASSFRGANQPQHF	5	4.43416e-05	TCRBV27-01*01	unknown	TCRBJ01-05*01
AGGCTGGAGTTGGCTGCTCCCTCCCAGACATCTGTGTACTTCTGTGCCAGCAGTTACTCAGACTGGAAAGAGCAGTACTTCGGGCCG	CASSYSDWKEQYF	5	4.43416e-05	TCRBV06-06	TCRBD02-01	TCRBJ02-07*01
AATGTGAACGCCTTGGAGCTGGAGGACTCGGCCCTGTATCTCTGTGCCAGCAGCTTATTGGGGAGGCCACCCCTCCACTTTGGGAAC	CASSLLGRPPLHF	5	4.43416e-05	TCRBV05-08*01	TCRBD02-01*02	TCRBJ01-06*01
ACATCGGCCCAAAAGAACCCGACAGCTTTCTATCTCTGTGCCAGTAGTCAAAATCTGGGAAATAATTCACCCCTCCACTTTGGGAAC	CASSQNLGNNSPLHF	5	4.43416e-05	TCRBV19-01	unknown	TCRBJ01-06*01
AATTCCCTGGAGCTTGGTGACTCTGCTGTGTATTTCTGTGCCAGCAGCCAAGATCTGACTAGCAGCTACGAGCAGTACTTCGGGCCG	CASSQDLTSSYEQYF	5	4.43416e-05	TCRBV03	TCRBD02-01	TCRBJ02-07*01
ACACAGCAGGAGGACTCGGCCGTGTATCTCTGTGCCAGCAGCTTAGAAGGGACTAGCGGGGGATACAATGAGCAGTTCTTCGGGCCA	CASSLEGTSGGYNEQFF	5	4.43416e-05	TCRBV07-02*01	TCRBD02-01*01	TCRBJ02-01*01
GCTGCTCCCTCCCAGACATCTGTGTACTTCTGTGCCAGCAGTTACACAGTACAGGGAGGGAGCACAGATACGCAGTATTTTGGCCCA	CASSYTVQGGSTDTQYF	5	4.43416e-05	TCRBV06	TCRBD02-01*02	TCRBJ02-03*01
TCACCAGGCCTGGGGGACGCAGCCATGTACCTGTGTGCCACCAGCGGTAGCGGGGGGGGACCCGGCGAGACCCAGTACTTCGGGCCA	CATSGSGGGPGETQYF	5	4.43416e-05	TCRBV15-01*01	TCRBD02-01*01	TCRBJ02-05*01
ACAGTGACCAGTGCCCATCCTGAAGACAGCAGCTTCTACATCTGCAGCCAACTTACAGGGGAGGACACTGAAGCTTTCTTTGGACAA	CSQLTGEDTEAFF	5	4.43416e-05	TCRBV20	TCRBD01-01*01	TCRBJ01-01*01
AACGCCTTGGAGCTGGACGACTCGGCCCTGTATCTCTGTGCCAGCAGCTTCGGGACAGGGGAAAATGGAAAACTGTTTTTTGGCAGT	CASSFGTGENGKLFF	5	4.43416e-05	TCRBV05-04*01	TCRBD01-01*01	TCRBJ01-04*01
CGCACAGAGCAGGGGGACTCGGCCATGTATCTCTGTGCCAGCAGCCCCTTATTAGAAGGGGAGAACTATGGCTACACCTTCGGTTCG	CASSPLLEGENYGYTF	5	4.43416e-05	TCRBV07-09	unknown	TCRBJ01-02*01
ATCCAGCGCACACAGCAGGAGGACTCGGCCGTGTATCTCTGTGCCAGCAGCTCTATTCCGGAGAGTAATGAGCAGTTCTTCGGGCCA	CASSSIPESNEQFF	5	4.43416e-05	TCRBV07-02*01	TCRBD02-01*02	TCRBJ02-01*01
ACGATCCAGCGCACACAGCAGGAGGACTCGGCCGTGTATCTCTGTGCCAGCAGCTTGGGAATACCAGAGACCCAGTACTTCGGGCCA	CASSLGIPETQYF	5	4.43416e-05	TCRBV07-02*01	unknown	TCRBJ02-05*01
AAGATCCAGCCTGCAGAGCTTGGGGACTCGGCCGTGTATCTCTGTGCCAGCAGCTTAGAAGGGGCCGGGGAGCTGTTTTTTGGAGAA	CASSLEGAGELFF	5	4.43416e-05	TCRBV11-03*01	TCRBD01-01*01	TCRBJ02-02*01
CAGCGCACACAGCAGGAGGACTCGGCCGTGTATCTCTGTGCCAGCAGTGGAGGTCGGGGAAACACAGATACGCAGTATTTTGGCCCA	CASSGGRGNTDTQYF	5	4.43416e-05	TCRBV07-02*01	TCRBD02-01	TCRBJ02-03*01
GCCTTGTTGCTGGGGGACTCGGCCCTCTATCTCTGTGCCAGCAGCTTTGACACAGGCCGCGTCGTAAACGAGCAGTACTTCGGGCCG	CASSFDTGRVVNEQYF	5	4.43416e-05	TCRBV05-06*01	TCRBD01-01*01	TCRBJ02-07*01
TCGGCTGCTCCCTCCCAGACATCTGTGTACTTCTGTGCCAGCAGTGAATCACTAGCGGGGGGCACAGATACGCAGTATTTTGGCCCA	CASSESLAGGTDTQYF	5	4.43416e-05	TCRBV06-01*01	TCRBD02-01*01	TCRBJ02-03*01
GTGACCAGTGCCCATCCTGAAGACAGCAGCTTCTACATCTGCAGTGCTAGAGATGACAGAACTGGAAACACCATATATTTTGGAGAG	CSARDDRTGNTIYF	5	4.43416e-05	TCRBV20	TCRBD01-01*01	TCRBJ01-03*01
GAGATCCAGCGCACAGAGCAGGGGGACTCGGCCATGTATCTCTGTGCCAGCAGCTTACTAGTCACCGGGGAGCTGTTTTTTGGAGAA	CASSLLVTGELFF	5	4.43416e-05	TCRBV07-09	TCRBD02-01	TCRBJ02-02*01
CTGGAGTCGCCCAGCCCCAACCAGACCTCTCTGTACTTCTGTGCCAGCAGTTTGGGGGGGTCCTACAATGAGCAGTTCTTCGGGCCA	CASSLGGSYNEQFF	5	4.43416e-05	TCRBV27-01*01	TCRBD02-01*01	TCRBJ02-01*01
ACATCGGCCCAAAAGAACCCGACAGCTTTCTATCTCTGTGCCAGTAGTACGACAGGGTGGACCTACAATGAGCAGTTCTTCGGGCCA	CASSTTGWTYNEQFF	5	4.43416e-05	TCRBV19-01	TCRBD01-01*01	TCRBJ02-01*01
TCAGAACCCAGGGACTCAGCTGTGTACTTCTGTGCCAGCAGCTTCGGACAGGGAGATGTGAGCAATCAGCCCCAGCATTTTGGTGAT	CASSFGQGDVSNQPQHF	5	4.43416e-05	TCRBV12	TCRBD01-01*01	TCRBJ01-05*01
GAGTCTGCTGCCTCCTCCCAGACATCTGTATATTTCTGCGCCAGCAGTGAGTCTGGACAGGGGATCACTGAAGCTTTCTTTGGACAA	CASSESGQGITEAFF	5	4.43416e-05	TCRBV10-01	TCRBD01-01*01	TCRBJ01-01*01
CGGTCCACAAAGCTGGAGGACTCAGCCATGTACTTCTGTGCCAGCAGACCTCGGGACAATTGGAACTATGGCTACACCTTCGGTTCG	CASRPRDNWNYGYTF	5	4.43416e-05	TCRBV02-01*01	TCRBD01-01*01	TCRBJ01-02*01
[truncated: 60,977 more rows]
